# Supplementary material for: Genome-wide analysis of long non-coding RNA expression profile in porcine circovirus 2-infected intestinal porcine epithelial cell line by RNA sequencing
Source: PeerJ. 2019 Mar 6;7:e6577. doi: 10.7717/peerj.6577 (PMC6408913; doi:10.7717/peerj.6577)
Supplement: Supplemental Information 4 [file peerj-07-6577-s004.xlsx]

## Sheet: Sheet1
Sample	Valid reads	Mapped reads	Unique Mapped reads	Multi Mapped reads	PE Mapped reads	Mapped left reads	Mapped right reads	Reads map to sense strand	Reads map to antisense strand	Non-splice reads	Splice reads
IPEC_A1_A	80878312	60119471(74.33%)	52015259(64.31%)	8104212(10.02%)	27152817(33.57%)	30734662(38.00%)	29384809(36.33%)	26137880(32.32%)	25877379(32.00%)	36561251(45.21%)	15454008(19.11%)
IPEC_A2_A	118735944	83276775(70.14%)	68919533(58.04%)	14357242(12.09%)	35811843(30.16%)	44287013(37.30%)	38989762(32.84%)	34891043(29.39%)	34028490(28.66%)	50572058(42.59%)	18347475(15.45%)
IPEC_A3_A	95957212	68392797(71.27%)	57387960(59.81%)	11004837(11.47%)	29565816(30.81%)	36233251(37.76%)	32159546(33.51%)	29089594(30.32%)	28298366(29.49%)	41144423(42.88%)	16243537(16.93%)
IPEC_B1_B	61536282	43649123(70.93%)	36629990(59.53%)	7019133(11.41%)	18831182(30.60%)	23264864(37.81%)	20384259(33.13%)	18558081(30.16%)	18071909(29.37%)	26187663(42.56%)	10442327(16.97%)
IPEC_B2_B	104564024	72601902(69.43%)	60890349(58.23%)	11711553(11.20%)	31120092(29.76%)	38705852(37.02%)	33896050(32.42%)	30809259(29.46%)	30081090(28.77%)	44092696(42.17%)	16797653(16.06%)
IPEC_B3_B	78821436	55065299(69.86%)	46457702(58.94%)	8607597(10.92%)	24358094(30.90%)	28986126(36.77%)	26079173(33.09%)	23515554(29.83%)	22942148(29.11%)	33579852(42.60%)	12877850(16.34%)
