# Supplementary material for: Genome-wide analysis of long non-coding RNA expression profile in porcine circovirus 2-infected intestinal porcine epithelial cell line by RNA sequencing
Source: PeerJ. 2019 Mar 6;7:e6577. doi: 10.7717/peerj.6577 (PMC6408913; doi:10.7717/peerj.6577)
Supplement: Supplemental Information 5 [file peerj-07-6577-s005.xlsx]

## Sheet: Sheet1
Samples	IPEC_A1_A	IPEC_A2_A	IPEC_A3_A	IPEC_B1_B	IPEC_B2_B	IPEC_B3_B
exon	67.02	59.28	63.17	63.22	61.7	62.37
intron	15	13.98	12.91	12.05	13.14	13.48
intergenic	17.98	26.74	23.92	24.73	25.16	24.15
