# Supplementary material for: Genome-wide analysis of long non-coding RNA expression profile in porcine circovirus 2-infected intestinal porcine epithelial cell line by RNA sequencing
Source: PeerJ. 2019 Mar 6;7:e6577. doi: 10.7717/peerj.6577 (PMC6408913; doi:10.7717/peerj.6577)
Supplement: Supplemental Information 6 [file peerj-07-6577-s006.xlsx]

## Sheet: Sheet1
Table1
Item*	Number
Total	36224
SampleFilter	13520
CPCFilter(score<=-1)	14001
CNCIFilter((length>=200)&(exon>=1)&(score<=0))	13520
* LCB utilized the class code with "u","i","x","j","o" as the candidate novel lncRNA with several filter with length, exon number, expression level in sample, and their potional function filter including CPC and CNCI filter
Table2
Sample	class code "i"	class code "j"	class code "o"	class code "u"	class code "x"	class code "="
IPEC_A1_A	1559	13	47	7881	223	0
IPEC_A2_A	785	12	45	4254	187	0
IPEC_A3_A	865	14	44	4596	190	0
IPEC_B1_B	1049	12	41	5591	202	0
IPEC_B2_B	788	14	42	4426	179	0
IPEC_B3_B	1009	14	43	5434	205	0
All(novel)	2182	14	48	10975	301
All(known)						0
