# Supplementary material for: Genome-wide analysis of long non-coding RNA expression profile in porcine circovirus 2-infected intestinal porcine epithelial cell line by RNA sequencing
Source: PeerJ. 2019 Mar 6;7:e6577. doi: 10.7717/peerj.6577 (PMC6408913; doi:10.7717/peerj.6577)
Supplement: Supplemental Information 7 [file peerj-07-6577-s007.xlsx]

## Sheet: Sheet1
t_id	class_code	Known/Novel	CPC_Score	CNCI_Score	chr	strand	start	end	t_name	num_exons	length	gene_id	gene_name	cov.IPEC_A1_A	FPKM.IPEC_A1_A	cov.IPEC_A2_A	FPKM.IPEC_A2_A	cov.IPEC_A3_A	FPKM.IPEC_A3_A	cov.IPEC_B1_B	FPKM.IPEC_B1_B	cov.IPEC_B2_B	FPKM.IPEC_B2_B	cov.IPEC_B3_B	FPKM.IPEC_B3_B
207	u	novel	-1.2259	-0.0319488	chr1	-	12129427	12132151	MSTRG.100.1	1	2725	MSTRG.100	.	9.02826	1.34728	0	0	0	0	0	0	4.3636	0.541703	0	0
18063	u	novel	-1.19956	-0.0004096	chr14	-	42074767	42075090	MSTRG.10000.1	1	324	MSTRG.10000	.	16.2901	2.43097	0	0	0	0	0	0	0	0	5.59259	0.919274
18064	u	novel	-1.08896	-0.02048	chr14	-	42076552	42077275	MSTRG.10001.1	1	724	MSTRG.10001	.	8.31768	1.24124	0	0	0	0	0	0	12.4309	1.5432	0	0
18060	i	novel	-1.49572	-0.0004096	chr14	-	42051479	42051741	MSTRG.10004.1	1	263	MSTRG.10004	TRAFD1	10.9087	1.62791	6.45274	0.717265	0	0	0	0	0	0	0	0
18083	u	novel	-1.1488	-0.073728	chr14	+	42363147	42366415	MSTRG.10009.1	2	1320	MSTRG.10009	.	9.82197	1.46573	2.70029	0.300155	0	0	3.3205	0.670751	2.92377	0.362961	5.50917	0.90556
18102	u	novel	-1.35785	-0.190874	chr14	-	42861593	42861864	MSTRG.10014.1	1	272	MSTRG.10014	.	9.38235	1.40013	0	0	13.2022	1.73549	8.51838	1.72074	0	0	8.82353	1.45035
18092	i	novel	-1.14895	-0.0004096	chr14	+	42583635	42583906	MSTRG.10016.1	1	272	MSTRG.10016	BICDL1	0	0	0	0	0	0	6.61765	1.33678	0	0	2.22059	0.365006
1843	i	novel	-1.22584	-0.0147456	chr1	-	114162051	114165128	MSTRG.1002.1	1	3078	MSTRG.1002	ENSSSCG00000004530	10.6092	1.5832	0	0	8.7498	1.1502	0	0	13.7047	1.70132	11.9493	1.96415
18109	u	novel	-1.05032	-0.14336	chr14	+	42901883	42902899	MSTRG.10026.1	1	1017	MSTRG.10026	.	0	0	0	0	9.52121	1.25161	5.84494	1.1807	0	0	0	0
18127	u	novel	-1.27616	-0.12288	chr14	+	43142500	43142771	MSTRG.10036.1	1	272	MSTRG.10036	.	9.99265	1.4912	0	0	3.30882	0.434961	0	0	0	0	0	0
18128	u	novel	-1.09572	-0.0004096	chr14	+	43143533	43144017	MSTRG.10037.1	1	485	MSTRG.10037	.	9.34021	1.39383	0	0	0	0	0	0	0	0	0	0
18129	u	novel	-1.17738	-0.0004096	chr14	+	43153799	43154040	MSTRG.10038.1	1	242	MSTRG.10038	.	11.8554	1.76917	0	0	0	0	2.47934	0.500834	0	0	0	0
1854	u	novel	-1.12689	-0.0004096	chr1	-	115113173	115113479	MSTRG.1004.1	1	307	MSTRG.1004	.	0	0	0	0	0.977199	0.128458	0	0	11.2378	1.39508	18.1987	2.99138
18136	i	novel	-1.04263	-0.0004096	chr14	-	43253622	43253979	MSTRG.10044.1	1	358	MSTRG.10044	SPPL3	13.4972	2.01418	0	0	4.18994	0.550789	0.837989	0.169276	0	0	1.68715	0.277323
18138	i	novel	-1.21876	-0.045056	chr14	-	43266790	43267901	MSTRG.10046.1	1	1112	MSTRG.10046	SPPL3	13.1718	1.96562	6.55396	0.728516	2.96493	0.389754	2.56025	0.517179	0	0	0	0
18139	i	novel	-1.45702	-0.0004096	chr14	-	43270414	43270736	MSTRG.10047.1	1	323	MSTRG.10047	SPPL3	0	0	0	0	0	0	3.25077	0.656666	0	0	9.79567	1.61015
18140	i	novel	-1.17104	-0.466944	chr14	-	43277297	43277695	MSTRG.10048.1	1	399	MSTRG.10048	SPPL3	0	0	0	0	0	0	6.75439	1.36441	0	0	0	0
18141	i	novel	-1.2968	-0.103629	chr14	-	43334234	43335351	MSTRG.10049.1	1	1118	MSTRG.10049	SPPL3	0	0	0	0	0	0	7.44902	1.50472	0	0	0	0
1861	u	novel	-1.1698	-0.0004096	chr1	-	115229638	115230189	MSTRG.1005.1	1	552	MSTRG.1005	.	10.3949	1.55123	0	0	0	0	0	0	0	0	1.06159	0.174498
1862	u	novel	-1.13966	-0.057344	chr1	-	115233482	115234321	MSTRG.1006.1	1	840	MSTRG.1006	.	9.88691	1.47542	0	0	0	0	5.71429	1.1543	0	0	0	0
18188	u	novel	-1.34385	-0.0978944	chr14	-	44271546	44271765	MSTRG.10064.1	1	220	MSTRG.10064	.	9.60909	1.43396	9.20454	1.02315	15.9955	2.10268	10.5682	2.13481	14.3182	1.77748	4.80455	0.789739
1863	u	novel	-1.25435	-0.0004096	chr1	-	115238565	115239449	MSTRG.1007.1	1	885	MSTRG.1007	.	10.4079	1.55317	0	0	0	0	0	0	0	0	0	0
18209	x	novel	-1.07473	-0.0339968	chr14	+	44806038	44806820	MSTRG.10077.1	1	783	MSTRG.10077	ENSSSCG00000009945	0	0	0	0	0	0	0	0	4.76884	0.592011	0	0
18219	u	novel	-1.43344	-0.0004096	chr14	+	45774865	45775290	MSTRG.10079.1	1	426	MSTRG.10079	.	11.3357	1.69162	0	0	0	0	0	0	0	0	0	0
18238	x	novel	-1.1396	-0.0352256	chr14	+	46980711	46981536	MSTRG.10086.1	1	826	MSTRG.10086	TFIP11	44.9637	6.70991	67.0763	7.45598	64.9165	8.53359	27.0472	5.46362	65.8341	8.17275	46.7809	7.68953
18256	u	novel	-1.466	-0.0004096	chr14	+	48191937	48192244	MSTRG.10087.1	1	308	MSTRG.10087	.	0	0	0	0	0	0	0	0	1.94805	0.241834	0	0
18249	u	novel	-1.07943	-0.0004096	chr14	+	48147186	48151915	MSTRG.10090.1	1	4730	MSTRG.10090	.	4.01945	0.599821	7.24588	0.805428	0	0	0	0	5.09937	0.633043	0	0
18250	u	novel	-1.00846	-0.125747	chr14	+	48154739	48155553	MSTRG.10091.1	1	815	MSTRG.10091	.	9.99386	1.49138	0	0	0	0	2.75583	0.556686	0	0	0	0
18252	u	novel	-1.21626	-0.0004096	chr14	+	48158250	48158547	MSTRG.10093.1	1	298	MSTRG.10093	.	21.7886	3.2515	0	0	0	0	0	0	0	0	3.04027	0.499739
18253	u	novel	-1.04932	-0.0004096	chr14	+	48163111	48163330	MSTRG.10094.1	1	220	MSTRG.10094	.	13.8955	2.07361	0	0	0	0	0	0	0	0	0	0
18254	u	novel	-1.07794	-0.0004096	chr14	+	48178051	48178535	MSTRG.10095.1	1	485	MSTRG.10095	.	9.0433	1.34953	0	0	0	0	0	0	0	0	0	0
18255	u	novel	-1.14369	-0.0004096	chr14	+	48179773	48180044	MSTRG.10096.1	1	272	MSTRG.10096	.	0	0	0	0	11.0294	1.44987	2.20588	0.445595	1.65441	0.205381	0	0
18264	u	novel	-1.2246	-0.053248	chr14	-	48936315	48936548	MSTRG.10097.1	1	234	MSTRG.10097	.	14.1966	2.11855	14.9413	1.66082	7.69231	1.01119	5.64103	1.1395	11.5385	1.4324	15	2.4656
208	u	novel	-1.20924	-0.0495616	chr1	-	12132934	12134252	MSTRG.101.1	1	1319	MSTRG.101	.	11.558	1.7248	13.0531	1.45094	11.696	1.53749	1.93328	0.390529	8.74905	1.08612	4.34799	0.714694
1864	u	novel	-1.0153	-0.278528	chr1	-	115286302	115286927	MSTRG.1010.1	1	626	MSTRG.1010	.	10.0607	1.50135	0	0	0	0	2.35144	0.474998	0.71885	0.089239	0	0
18270	u	novel	-1.23557	-0.0004096	chr14	+	49167332	49167773	MSTRG.10105.1	1	442	MSTRG.10105	.	10.2489	1.52944	0	0	0	0	0	0	0	0	0	0
1865	u	novel	-1.32695	-0.0004096	chr1	-	115339174	115339456	MSTRG.1011.1	1	283	MSTRG.1011	.	9.60424	1.43324	4.24028	0.471336	0	0	0	0	1.06007	0.131599	0	0
1866	u	novel	-1.21528	-0.0004096	chr1	-	115339976	115340268	MSTRG.1012.1	1	293	MSTRG.1012	.	9.27645	1.38432	0	0	0	0	0	0	0	0	0	0
18320	u	novel	-1.0619	-0.0909312	chr14	-	49905668	49906228	MSTRG.10123.1	1	561	MSTRG.10123	.	10.4171	1.55454	22.3565	2.48508	10.3422	1.35954	11.4973	2.32249	30.5455	3.79196	21.5508	3.54238
18322	i	novel	-1.38975	-0.032768	chr14	+	49973958	49974218	MSTRG.10126.1	1	261	MSTRG.10126	MTMR3	21.954	3.27619	12.6437	1.40543	0	0	8.03448	1.62299	30.4023	3.77419	18.3908	3.02296
1867	u	novel	-1.14343	-0.0004096	chr1	-	115429806	115430094	MSTRG.1013.1	1	289	MSTRG.1013	.	11.4948	1.71537	0	0	0	0	0	0	0	0	0	0
18338	i	novel	-1.25693	-0.200704	chr14	+	50419170	50419381	MSTRG.10134.1	1	212	MSTRG.10134	ENSSSCG00000010002	3.56132	0.531455	0	0	1.94284	0.255396	4.23113	0.854702	0	0	14.9575	2.45862
1868	u	novel	-1.01217	-0.0004096	chr1	-	115436777	115437003	MSTRG.1014.1	1	227	MSTRG.1014	.	13.7181	2.04714	0	0	0	0	0	0	0	0	0	0
1870	u	novel	-1.23653	-0.0004096	chr1	-	116079952	116080217	MSTRG.1015.1	1	266	MSTRG.1015	.	10.7857	1.60955	2.80827	0.312158	2.25564	0.296515	1.69173	0.341734	0	0	0.864662	0.142127
18378	i	novel	-1.38125	-0.206848	chr14	+	50763527	50763773	MSTRG.10155.1	1	247	MSTRG.10155	OSBP2	6.7247	1.00352	2.8664	0.318619	5.4413	0.715285	7.28745	1.47209	5.46559	0.678506	12.1457	1.99644
18381	u	novel	-1.02638	-0.004096	chr14	+	50911486	50922114	MSTRG.10158.1	2	9051	MSTRG.10158	.	48.5881	7.25079	44.5738	4.95468	33.031	4.34209	30.473	6.15565	28.2369	3.50537	19.5066	3.20637
18382	u	novel	-1.01436	-0.004096	chr14	+	50911486	50922114	MSTRG.10158.2	3	7397	MSTRG.10158	.	5.95026	0.887955	17.965	1.99693	19.3731	2.54669	2.90111	0.586033	4.66929	0.579653	10.8482	1.78316
18383	u	novel	-1.00389	-0.004096	chr14	+	50911909	50921600	MSTRG.10158.3	3	6371	MSTRG.10158	.	2.23688	0.333808	1.92635	0.214127	0.303411	0.039885	6.67738	1.34885	1.18492	0.147097	0.930898	0.153015
18384	u	novel	-1.20849	-0.0004096	chr14	-	50955982	50956371	MSTRG.10159.1	1	390	MSTRG.10159	.	0	0	21.2051	2.35709	11.7538	1.5451	8.83077	1.78384	10.124	1.25681	0	0
1871	u	novel	-1.26572	-0.0352256	chr1	-	116081123	116081441	MSTRG.1016.1	1	319	MSTRG.1016	.	9.94044	1.48341	1.41066	0.156804	6.4326	0.845597	0.940439	0.189972	2.82132	0.350243	0	0
18400	x	novel	-1.03916	-0.0004096	chr14	+	51161497	51173929	MSTRG.10166.2	2	864	MSTRG.10166	PIK3IP1	0.288061	0.042987	0.406489	0.045184	0.382289	0.050254	9.25232	1.869	0.427418	0.05306	0.748908	0.123101
18401	u	novel	-1.06926	-0.028672	chr14	+	51162471	51163962	MSTRG.10167.1	1	1492	MSTRG.10167	.	0	0	5.67694	0.631031	0	0	2.18834	0.442051	0	0	8.67829	1.42648
1872	u	novel	-1.27998	-0.06144	chr1	+	116119129	116119526	MSTRG.1017.1	1	398	MSTRG.1017	.	0	0	0	0	0	0	6.63317	1.33992	0	0	0	0
18411	u	novel	-1.00444	-0.028672	chr14	-	51350538	51354561	MSTRG.10171.1	1	4024	MSTRG.10171	.	10.3385	1.54281	0	0	4.26447	0.560586	0	0	0	0	0	0
18412	u	novel	-1.18315	-0.0344064	chr14	-	51354823	51355978	MSTRG.10172.1	1	1156	MSTRG.10172	.	12.2388	1.82638	0	0	10.282	1.35162	3.64017	0.735324	0	0	3.11938	0.512743
18413	u	novel	-1.36463	-0.0004096	chr14	-	51356309	51357133	MSTRG.10173.1	1	825	MSTRG.10173	.	0	0	0	0	14.4436	1.89869	0	0	0	0	0	0
18414	u	novel	-1.20984	-0.02048	chr14	-	51357666	51359701	MSTRG.10174.1	1	2036	MSTRG.10174	.	12.0727	1.8016	0	0	0	0	0	0	0	0	0	0
18415	u	novel	-1.13072	-0.0004096	chr14	-	51360233	51361343	MSTRG.10175.1	1	1111	MSTRG.10175	.	13.4392	2.00553	0	0	0	0	0	0	0	0	0	0
18423	u	novel	-1.23106	-0.167936	chr14	+	51548963	51550379	MSTRG.10177.1	1	1417	MSTRG.10177	.	0	0	0	0	8.34298	1.09672	3.59915	0.72704	0	0	5.48271	0.901212
18438	i	novel	-1.06474	-0.0004096	chr14	+	51864031	51869754	MSTRG.10183.1	2	4916	MSTRG.10183	YWHAH	25.7716	3.84589	35.5572	3.95242	26.9121	3.53773	15.3378	3.09828	21.8214	2.70893	19.9276	3.27557
18439	u	novel	-1.33127	-0.0004096	chr14	+	51903569	51903835	MSTRG.10189.1	1	267	MSTRG.10189	.	8.46067	1.26258	0	0	2.24719	0.295404	0	0	0	0	11.8764	1.95216
1874	u	novel	-1.02642	-0.0004096	chr1	+	116168664	116169010	MSTRG.1019.1	1	347	MSTRG.1019	.	11.5706	1.72668	19.6571	2.18501	13.6369	1.79264	0	0	0	0	0	0
18447	x	novel	-1.00824	-0.0659456	chr14	-	52255721	52287116	MSTRG.10197.1	2	2576	MSTRG.10197	IGLV-9	9.4179	1.40543	10.7108	1.19058	11.6533	1.53189	4.70714	0.950857	0	0	4.93268	0.810802
209	u	novel	-1.23122	-0.189645	chr1	+	12184860	12188106	MSTRG.102.1	1	3247	MSTRG.102	.	12.9874	1.9381	0	0	0	0	0	0	5.24607	0.651255	0	0
1875	u	novel	-1.31429	-0.241664	chr1	+	116169911	116170450	MSTRG.1020.1	1	540	MSTRG.1020	.	0	0	0	0	11.237	1.47716	2.5	0.505008	13.6056	1.68901	4.7537	0.781383
18471	i	novel	-1.22016	-0.217088	chr14	-	52617594	52618098	MSTRG.10204.1	2	289	MSTRG.10204	RAB36	0	0	0	0	0	0	0	0	15.2768	1.89649	0	0
18474	u	novel	-1.02749	-0.126976	chr14	+	52650319	52650544	MSTRG.10206.1	1	226	MSTRG.10206	.	18.6903	2.78914	0	0	0	0	0	0	0	0	0	0
1876	u	novel	-1.22433	-0.49152	chr1	-	116335805	116336040	MSTRG.1021.1	1	236	MSTRG.1021	.	8.87288	1.3241	0	0	7.56356	0.994267	6.94915	1.40375	7.62712	0.946842	0	0
18484	i	novel	-1.17173	-0.14336	chr14	+	52923702	52924002	MSTRG.10210.2	1	301	MSTRG.10210	ADORA2A	139.658	20.8411	191.179	21.2509	174.807	22.9793	101.884	20.5808	143.85	17.8578	143.884	23.6507
18485	u	novel	-1.15945	-0.0290816	chr14	-	52965016	52965277	MSTRG.10211.1	1	262	MSTRG.10211	.	8.64504	1.2901	4.00763	0.445476	3.43512	0.451563	3.77863	0.763294	8.38931	1.04146	11.5267	1.89469
18492	u	novel	-1.24622	-0.036864	chr14	+	53045595	53046024	MSTRG.10215.1	1	430	MSTRG.10215	.	11.2279	1.67554	0	0	0	0	0	0	0	0	0.702326	0.115444
1877	u	novel	-1.26924	-0.04096	chr1	-	116571069	116574007	MSTRG.1022.1	1	2939	MSTRG.1022	.	53.3862	7.9668	34.2445	3.8065	31.1036	4.08872	20.8144	4.20457	37.7885	4.69113	25.711	4.2262
18543	u	novel	-1.03252	-0.038912	chr14	+	53520089	53520928	MSTRG.10230.1	1	840	MSTRG.10230	.	10.7357	1.60209	0	0	11.6762	1.53489	5.33929	1.07855	15.1417	1.87971	0	0
18544	u	novel	-1.26098	-0.090112	chr14	-	53524191	53525587	MSTRG.10231.1	1	1397	MSTRG.10231	.	7.54259	1.12558	0	0	0	0	7.58912	1.53303	0	0	4.69077	0.771037
18545	u	novel	-1.15414	-0.0512	chr14	-	53527595	53530613	MSTRG.10232.1	1	3019	MSTRG.10232	.	9.30904	1.38918	0	0	2.48525	0.326699	0	0	14.7002	1.8249	0	0
18546	u	novel	-1.05058	-0.0004096	chr14	-	53530928	53531463	MSTRG.10233.1	1	536	MSTRG.10233	.	10.1362	1.51262	0	0	0	0	0	0	0	0	0	0
18547	u	novel	-1.16631	-0.002048	chr14	-	53533192	53539239	MSTRG.10234.1	1	6048	MSTRG.10234	.	6.42874	0.959358	5.27629	0.586495	6.03836	0.793772	4.09919	0.828048	10.8254	1.34388	0	0
18548	u	novel	-1.06291	-0.0004096	chr14	+	53555299	53555698	MSTRG.10235.1	1	400	MSTRG.10235	.	0	0	0	0	0	0	0	0	0	0	9.06	1.48922
18550	u	novel	-1.23649	-0.110592	chr14	+	53558364	53560006	MSTRG.10237.1	1	1643	MSTRG.10237	.	9.07486	1.35424	0	0	0	0	3.36701	0.680147	0	0	0	0
18551	u	novel	-1.12458	-0.032768	chr14	+	53561062	53563034	MSTRG.10238.1	1	1973	MSTRG.10238	.	0	0	0	0	0	0	0	0	11.8231	1.46774	0	0
1879	u	novel	-1.00904	-0.053248	chr1	+	116767898	116768214	MSTRG.1024.1	1	317	MSTRG.1024	.	12.8707	1.92068	0	0	0	0	0	0	0	0	0	0
18570	u	novel	-1.02368	-0.0720896	chr14	+	53806787	53807220	MSTRG.10249.1	1	434	MSTRG.10249	.	0	0	0	0	0	0	8.60829	1.7389	0	0	0	0
1880	u	novel	-1.19672	-0.045056	chr1	+	116770071	116770450	MSTRG.1025.1	1	380	MSTRG.1025	.	0	0	0	0	13.0263	1.71237	0	0	0	0	0	0
18571	u	novel	-1.27716	-0.0004096	chr14	+	53807527	53807884	MSTRG.10250.1	1	358	MSTRG.10250	.	4.53911	0.677369	0	0	0	0	0	0	10.8939	1.35238	0	0
18572	u	novel	-1.05621	-0.0151552	chr14	+	53808813	53809168	MSTRG.10251.1	1	356	MSTRG.10251	.	0.848315	0.126594	4.58146	0.50926	7.58427	0.996989	6.63483	1.34026	5.37079	0.666738	4.24157	0.697202
18587	u	novel	-1.26674	-0.0274432	chr14	-	53962639	53962892	MSTRG.10253.1	1	254	MSTRG.10253	.	18.3898	2.7443	31.1339	3.46074	19.4016	2.55043	8.26772	1.6701	32.4173	4.02433	29.6181	4.86843
18588	u	novel	-1.3147	-0.0782336	chr14	-	53963763	53963974	MSTRG.10254.1	1	212	MSTRG.10254	.	0	0	4.24528	0.471892	0	0	0	0	0	0	11.1698	1.83602
1881	u	novel	-1.0922	-0.06144	chr1	+	116770703	116771061	MSTRG.1026.1	1	359	MSTRG.1026	.	9.25348	1.38089	0	0	0	0	10.0279	2.02566	0	0	11.7772	1.93585
18608	i	novel	-1.31053	-0.121651	chr14	-	54075961	54076190	MSTRG.10261.1	1	230	MSTRG.10261	P2RX6	10.5043	1.56756	0	0	0	0	0	0	1.95652	0.242886	0	0
18610	u	novel	-1.03579	-0.045056	chr14	-	54151869	54152237	MSTRG.10262.1	1	369	MSTRG.10262	.	15.3455	2.29001	21.2656	2.36381	7.88889	1.03703	0	0	14.2927	1.77432	0	0
18603	i	novel	-1.05221	-0.028672	chr14	+	54053096	54054090	MSTRG.10269.1	1	995	MSTRG.10269	LRRC74B	0	0	0	0	0	0	3.27839	0.662245	0	0	0	0
18624	u	novel	-1.02438	-0.0004096	chr14	-	54316780	54317115	MSTRG.10281.1	1	336	MSTRG.10281	.	0	0	16.1696	1.79737	1.90538	0.250471	2.23214	0.4509	10.3393	1.28354	0	0
18635	x	novel	-1.30446	-0.0847872	chr14	-	54450111	54450527	MSTRG.10287.1	1	417	MSTRG.10287	TSSK2	8.69065	1.2969	0	0	0	0	0	0	0	0	14.3405	2.3572
18639	u	novel	-1.27205	-0.151552	chr14	-	54478952	54479655	MSTRG.10288.1	1	704	MSTRG.10288	.	7.72159	1.15229	0	0	6.71449	0.882652	0	0	0	0	8.74006	1.43663
1886	u	novel	-1.31766	-0.0028672	chr1	-	117231902	117232184	MSTRG.1029.1	1	283	MSTRG.1029	.	9.07067	1.35361	0	0	0	0	0	0	0	0	0	0
18650	u	novel	-1.16574	-0.032768	chr14	-	54545526	54545963	MSTRG.10294.1	1	438	MSTRG.10294	.	4.13699	0.617361	0	0	0	0	6.98173	1.41033	0	0	0	0
18652	u	novel	-1.10654	-0.24576	chr14	-	54577648	54577886	MSTRG.10296.1	1	239	MSTRG.10296	.	12.0042	1.79138	0	0	0	0	0	0	0	0	0	0
210	u	novel	-1.38296	-0.0004096	chr1	+	12188361	12188832	MSTRG.103.1	1	472	MSTRG.103	.	14.3898	2.14739	0	0	0	0	0	0	0	0	0	0
18683	x	novel	-1.18168	-0.0995328	chr14	+	54778516	54778794	MSTRG.10305.1	1	279	MSTRG.10305	CLDN5	0	0	0	0	10.172	1.33716	0	0	0	0	0.541219	0.088962
18729	u	novel	-1.37452	-0.079872	chr14	-	55356364	55356601	MSTRG.10320.1	1	238	MSTRG.10320	.	3.80672	0.568076	20.1261	2.23715	0	0	1.2605	0.254626	0.630252	0.07824	0	0
18732	u	novel	-1.19472	-0.0905216	chr14	-	55525846	55526048	MSTRG.10321.1	1	203	MSTRG.10321	.	14.0739	2.10024	0	0	0	0	0	0	0	0	0.743842	0.122268
18733	u	novel	-1.08095	-0.0212992	chr14	-	56208680	56209098	MSTRG.10322.1	1	419	MSTRG.10322	.	0	0	0	0	0	0	7.82816	1.58131	0	0	0	0
18734	u	novel	-1.19966	-0.0004096	chr14	-	56215757	56217412	MSTRG.10323.1	1	1656	MSTRG.10323	.	11.7989	1.76075	0	0	0	0	0	0	0	0	0	0
18735	u	novel	-1.30135	-0.0004096	chr14	-	56222085	56222748	MSTRG.10324.1	1	664	MSTRG.10324	.	13.4172	2.00224	11.2018	1.24516	0	0	6.77711	1.369	11.2801	1.40033	4.99849	0.82162
18736	u	novel	-1.22334	-0.090112	chr14	-	56223623	56225303	MSTRG.10325.1	1	1681	MSTRG.10325	.	0	0	10.99	1.22161	0	0	7.38429	1.49165	0	0	8.18739	1.34579
18737	u	novel	-1.30548	-0.0004096	chr14	-	56225730	56226379	MSTRG.10326.1	1	650	MSTRG.10326	.	8.82308	1.31666	0	0	3.67692	0.48335	2.40154	0.485118	0	0	0	0
18738	u	novel	-1.2096	-0.126976	chr14	-	56227723	56231096	MSTRG.10327.1	1	3374	MSTRG.10327	.	12.4855	1.8632	11.5516	1.28404	10.7359	1.41129	6.0083	1.21369	14.0922	1.74942	8.6799	1.42675
18739	u	novel	-1.2425	-0.036864	chr14	+	56231420	56231748	MSTRG.10328.1	1	329	MSTRG.10328	.	0	0	0	0	0	0	4.55927	0.920986	16.4134	2.03758	0	0
18740	u	novel	-1.32571	-0.0004096	chr14	+	56234202	56234485	MSTRG.10329.1	1	284	MSTRG.10329	.	17.4472	2.60364	10.25	1.13936	6.74296	0.886395	0	0	8.97887	1.11465	0	0
18741	u	novel	-1.15282	-0.0004096	chr14	+	56235012	56235862	MSTRG.10330.1	1	851	MSTRG.10330	.	17.8837	2.66877	0	0	5.46416	0.718291	4.396	0.888006	0	0	6.51234	1.07045
18743	u	novel	-1.03855	-0.200704	chr14	+	56239766	56242313	MSTRG.10332.1	1	2548	MSTRG.10332	.	9.39246	1.40163	0	0	0	0	0	0	0	0	0	0
18746	u	novel	-1.13821	-0.08192	chr14	-	56258415	56266338	MSTRG.10335.1	1	7924	MSTRG.10335	.	11.4262	1.70512	8.07572	0.897671	0	0	10.0261	2.02531	0	0	10.3954	1.70872
18749	u	novel	-1.20077	-0.104038	chr14	+	56356503	56356828	MSTRG.10338.1	1	326	MSTRG.10338	.	4.16871	0.622095	20.3482	2.26184	8.51227	1.11898	6.8773	1.38924	11.362	1.41049	8.69018	1.42843
1897	u	novel	-1.12198	-0.086016	chr1	+	117531493	117531762	MSTRG.1034.1	1	270	MSTRG.1034	.	11.1852	1.66916	0	0	0.555556	0.073031	0	0	0	0	0	0
18752	u	novel	-1.0784	-0.0167936	chr14	+	56398630	56400149	MSTRG.10341.1	1	1520	MSTRG.10341	.	7.15263	1.06738	16.1132	1.79109	0	0	0	0	12.4053	1.54001	11.9987	1.97226
18753	u	novel	-1.38205	-0.0004096	chr14	+	56401374	56403004	MSTRG.10342.1	1	1631	MSTRG.10342	.	9.2802	1.38488	0	0	0	0	0	0	0	0	0	0
18755	u	novel	-1.11204	-0.0638976	chr14	+	56410707	56411714	MSTRG.10344.1	1	1008	MSTRG.10344	.	0	0	0	0	0	0	6.52579	1.31823	0	0	0	0
18757	u	novel	-1.18379	-0.0004096	chr14	+	56414960	56415607	MSTRG.10346.1	1	648	MSTRG.10346	.	10.9336	1.63162	0	0	7.63889	1.00417	0	0	0	0	5.59259	0.919274
18758	u	novel	-1.25574	-0.0004096	chr14	+	56421753	56422094	MSTRG.10347.1	1	342	MSTRG.10347	.	0	0	0	0	0	0	6.54386	1.32188	0	0	0	0
18759	u	novel	-1.31613	-0.0909312	chr14	+	56428717	56429155	MSTRG.10348.1	1	439	MSTRG.10348	.	0	0	0	0	2.93394	0.385681	0	0	3.41686	0.424174	8.48975	1.39549
18761	u	novel	-1.16753	-0.0004096	chr14	+	56432415	56432874	MSTRG.10350.1	1	460	MSTRG.10350	.	0	0	0	0	0	0	0	0	0	0	8.53478	1.40289
18763	u	novel	-1.06267	-0.0004096	chr14	+	56443618	56444055	MSTRG.10352.1	1	438	MSTRG.10352	.	12.0662	1.80064	0	0	0.684932	0.090038	0	0	0	0	0	0
18764	u	novel	-1.31112	-0.0004096	chr14	+	56448551	56449101	MSTRG.10353.1	1	551	MSTRG.10353	.	10.2468	1.52913	0	0	3.26679	0.429435	0	0	0	0	0	0
18766	u	novel	-1.17884	-0.053248	chr14	+	56455217	56456192	MSTRG.10355.1	1	976	MSTRG.10355	.	11.4139	1.7033	0	0	0	0	7.9416	1.60423	0	0	0	0
18767	u	novel	-1.35989	-0.0004096	chr14	+	56457521	56457845	MSTRG.10356.1	1	325	MSTRG.10356	.	0	0	0	0	0	0	11.04	2.23011	0	0	0	0
1898	u	novel	-1.07969	-0.065536	chr1	+	117534436	117534939	MSTRG.1036.1	1	504	MSTRG.1036	.	11.3849	1.69897	0	0	0	0	0	0	0	0	0	0
18771	u	novel	-1.42245	-0.02048	chr14	+	56494104	56494480	MSTRG.10360.1	1	377	MSTRG.10360	.	0	0	0	0	0	0	13.9151	2.8109	13.122	1.62899	15.6101	2.56588
18772	u	novel	-1.16857	-0.0004096	chr14	+	56501324	56501858	MSTRG.10361.1	1	535	MSTRG.10361	.	0	0	0	0	0	0	6.61682	1.33662	4.48598	0.556896	0	0
18773	u	novel	-1.224	-0.0004096	chr14	+	56502270	56502936	MSTRG.10362.1	1	667	MSTRG.10362	.	8.7931	1.31219	0	0	0	0	0	0	0	0	0	0
18774	u	novel	-1.05015	-0.0004096	chr14	+	56508699	56509053	MSTRG.10363.1	1	355	MSTRG.10363	.	10.6338	1.58688	0	0	5.06197	0.665421	0	0	0	0	0	0
18775	u	novel	-1.23204	-0.0004096	chr14	+	56528844	56529975	MSTRG.10364.1	1	1132	MSTRG.10364	.	0	0	0	0	6.76699	0.889553	10.4664	2.11425	1.94956	0.242022	0	0
18776	u	novel	-1.14585	-0.0004096	chr14	+	56532464	56532818	MSTRG.10365.1	1	355	MSTRG.10365	.	15.738	2.34858	0	0	0	0	0	0	0	0	6.65916	1.09459
18778	u	novel	-1.23235	-0.0004096	chr14	+	56538490	56539180	MSTRG.10367.1	1	691	MSTRG.10367	.	3.34662	0.499415	1.73227	0.192554	2.15774	0.283646	0	0	0	0	8.29522	1.36351
18779	u	novel	-1.26501	-0.0249856	chr14	+	56540432	56540745	MSTRG.10368.1	1	314	MSTRG.10368	.	0	0	6.96815	0.774557	0	0	0	0	0	0	10.0987	1.65996
1899	u	novel	-1.16238	-0.090112	chr1	-	117586070	117590112	MSTRG.1037.1	1	4043	MSTRG.1037	.	1.72955	0.258101	5.59139	0.621521	4.24017	0.557391	6.76923	1.3674	9.7393	1.20905	0	0
18781	u	novel	-1.10175	-0.0004096	chr14	+	56630809	56631106	MSTRG.10370.1	1	298	MSTRG.10370	.	10.6409	1.58794	0.879195	0.097728	0	0	0	0	0	0	0	0
18807	i	novel	-1.38184	-0.022528	chr14	+	59037387	59037720	MSTRG.10373.1	1	334	MSTRG.10373	ENSSSCG00000023708	10.3982	1.55172	0	0	0	0	0	0	0	0	0	0
1900	u	novel	-1.12995	-0.0004096	chr1	-	117590418	117590708	MSTRG.1038.1	1	291	MSTRG.1038	.	9.62543	1.4364	0	0	0	0	0	0	2.57732	0.319952	0	0
18815	i	novel	-1.48381	-0.0004096	chr14	+	59303648	59303865	MSTRG.10380.1	1	218	MSTRG.10380	ENSSSCG00000024830	0	0	0	0	0	0	0	0	0	0	8.31193	1.36626
18827	u	novel	-1.10383	-0.006144	chr14	-	59818871	59819497	MSTRG.10383.1	1	627	MSTRG.10383	.	9.39234	1.40162	0	0	0	0	0	0	0	0	0	0
18828	u	novel	-1.0928	-0.0217088	chr14	-	59820241	59820565	MSTRG.10384.1	1	325	MSTRG.10384	.	0	0	0	0	0	0	7.6	1.53522	0	0	0	0
18829	u	novel	-1.02656	-0.008192	chr14	-	59826918	59827198	MSTRG.10385.1	1	281	MSTRG.10385	.	0	0	7.4306	0.825962	12.7438	1.67523	9.06406	1.83097	0	0	0	0
18831	u	novel	-1.38849	-0.141312	chr14	+	59857451	59857662	MSTRG.10386.1	1	212	MSTRG.10386	.	0	0	2.83019	0.314595	2.83019	0.372042	6.32547	1.27777	0	0	12.8208	2.10739
18833	u	novel	-1.2937	-0.0004096	chr14	-	59951879	59952329	MSTRG.10390.1	1	451	MSTRG.10390	.	0	0	0	0	3.65854	0.480933	6.98448	1.41089	0	0	0	0
18850	u	novel	-1.10195	-0.0004096	chr14	+	60021359	60021747	MSTRG.10393.1	1	389	MSTRG.10393	.	10.0925	1.50611	0	0	0	0	3.85604	0.778932	0	0	0	0
18837	u	novel	-1.00596	-0.0303104	chr14	-	59975573	59976490	MSTRG.10394.1	1	918	MSTRG.10394	.	11.6166	1.73354	0	0	0	0	0	0	0	0	0	0
18838	u	novel	-1.14925	-0.0004096	chr14	-	59977140	59977758	MSTRG.10395.1	1	619	MSTRG.10395	.	0	0	0	0	10.8998	1.43284	0	0	0	0	0	0
18840	u	novel	-1.23294	-0.0004096	chr14	-	59980383	59980599	MSTRG.10397.1	1	217	MSTRG.10397	.	9.74194	1.45379	0	0	0	0	0	0	0	0	0	0
18841	u	novel	-1.14813	-0.0004096	chr14	-	59981895	59982404	MSTRG.10398.1	1	510	MSTRG.10398	.	0	0	0	0	0	0	0	0	0	0	11.1157	1.82712
18842	u	novel	-1.1458	-0.106496	chr14	-	59982835	59983168	MSTRG.10399.1	1	334	MSTRG.10399	.	9.93713	1.48291	0	0	0	0	10.2994	2.08051	0	0	0	0
211	u	novel	-1.27358	-0.012288	chr1	+	12191182	12192063	MSTRG.104.1	1	882	MSTRG.104	.	0	0	0	0	10.7755	1.41649	0	0	0	0	0	0
18843	u	novel	-1.31699	-0.004096	chr14	-	59985125	59986176	MSTRG.10400.1	1	1052	MSTRG.10400	.	10.02	1.49527	0	0	0	0	7.47909	1.5108	9.56747	1.18772	0	0
18844	u	novel	-1.03061	-0.012288	chr14	-	59988040	59989345	MSTRG.10401.1	1	1306	MSTRG.10401	.	9.134	1.36306	0	0	0	0	4.8193	0.973512	0	0	1.4988	0.246363
18848	u	novel	-1.04628	-0.02048	chr14	-	60005441	60005903	MSTRG.10404.1	1	463	MSTRG.10404	.	0	0	12.1638	1.35209	9.5378	1.25379	8.09935	1.63609	0	0	0	0
18849	u	novel	-1.16225	-0.233472	chr14	-	60006499	60007325	MSTRG.10405.1	1	827	MSTRG.10405	.	11.1342	1.66155	0	0	0	0	0	0	0	0	0	0
18851	u	novel	-1.17813	-0.139264	chr14	+	60024244	60024492	MSTRG.10406.1	1	249	MSTRG.10406	.	9.70281	1.44795	0	0	0	0	0	0	0	0	0.606426	0.09968
18852	u	novel	-1.03427	-0.117555	chr14	-	60028689	60032606	MSTRG.10407.1	1	3918	MSTRG.10407	.	11.584	1.72867	17.0814	1.89871	9.45993	1.24355	6.73941	1.36138	13.6072	1.68922	11.6687	1.91803
18855	u	novel	-1.1496	-0.0352256	chr14	+	60036102	60037050	MSTRG.10409.1	1	949	MSTRG.10409	.	5.8451	0.872262	9.47102	1.05277	8.31507	1.09306	5.78714	1.16902	12.1686	1.51063	0	0
18856	u	novel	-1.19555	-0.02048	chr14	+	60051796	60052425	MSTRG.10410.1	1	630	MSTRG.10410	.	9.09365	1.35704	0	0	0	0	0	0	0	0	0	0
18857	u	novel	-1.20432	-0.0004096	chr14	+	60058665	60059384	MSTRG.10411.1	1	720	MSTRG.10411	.	3.93126	0.58666	0	0	0	0	0	0	8.12603	1.00878	9.02639	1.4837
18858	u	novel	-1.42477	-0.0004096	chr14	+	60065844	60066194	MSTRG.10412.1	1	351	MSTRG.10412	.	9.89459	1.47656	0	0	0	0	1.28205	0.258978	0	0	0	0
18859	u	novel	-1.13526	-0.0004096	chr14	+	60067335	60068340	MSTRG.10413.1	1	1006	MSTRG.10413	.	0	0	0	0	0	0	0	0	8.49901	1.05508	7.11829	1.17006
18868	u	novel	-1.16814	-0.024576	chr14	+	60233438	60236725	MSTRG.10421.1	2	2982	MSTRG.10421	.	25.4768	3.80189	33.5392	3.72811	31.3375	4.11947	18.941	3.82614	30.9581	3.84318	22.8366	3.75373
18874	u	novel	-1.2729	-0.0151552	chr14	+	60811171	60811936	MSTRG.10425.1	1	766	MSTRG.10425	.	11.5078	1.71731	0	0	0	0	0	0	0	0	0	0
18876	u	novel	-1.10316	-0.06144	chr14	+	61400994	61401228	MSTRG.10426.1	1	235	MSTRG.10426	.	10.8213	1.61485	22.9149	2.54714	15.8468	2.08314	8.28511	1.67362	10.7915	1.33967	15.3319	2.52016
18885	i	novel	-1.34923	-0.098304	chr14	-	61786641	61786863	MSTRG.10430.1	1	223	MSTRG.10430	PCNX2	0.654709	0.097702	0	0	1.32735	0.174487	1.34529	0.271753	0	0	12.7982	2.10369
18886	i	novel	-1.13253	-0.0794624	chr14	+	61852675	61852965	MSTRG.10431.1	1	291	MSTRG.10431	PCNX2	0	0	4.50172	0.500396	4.63917	0.609842	0	0	7.17526	0.890747	10.378	1.70587
18903	i	novel	-1.13078	-0.0577536	chr14	+	63431116	63431324	MSTRG.10437.1	1	209	MSTRG.10437	DISC1	0	0	14.2775	1.58704	1.43541	0.188691	1.43541	0.289957	0	0	10.799	1.77508
18904	u	novel	-1.14418	-0.0548864	chr14	-	63561820	63562139	MSTRG.10438.1	1	320	MSTRG.10438	.	0	0	0	0	0.459375	0.060387	0	0	0.46875	0.058191	9.35	1.53689
18913	i	novel	-1.04258	-0.253952	chr14	-	63855110	63855500	MSTRG.10443.1	1	391	MSTRG.10443	SPRTN	11.5857	1.72893	0	0	0	0	2.68542	0.542463	0	0	0	0
18923	u	novel	-1.00188	-0.045056	chr14	+	63933024	63933838	MSTRG.10446.1	1	815	MSTRG.10446	.	0	0	5.32024	0.591381	0	0	9.97546	2.01507	17.5828	2.18276	7.16319	1.17744
1913	u	novel	-1.02937	-0.04096	chr1	+	118035025	118035411	MSTRG.1045.1	1	387	MSTRG.1045	.	9.36434	1.39744	0	0	0	0	0	0	0	0	0	0
18958	u	novel	-1.17953	-0.0004096	chr14	-	65130390	65130593	MSTRG.10460.1	1	204	MSTRG.10460	.	0.740196	0.110459	0	0	0	0	0	0	0	0	8.88235	1.46002
18965	u	novel	-1.20467	-0.253952	chr14	-	65312931	65313231	MSTRG.10467.1	1	301	MSTRG.10467	.	10.0332	1.49725	8.89369	0.988593	6.45515	0.848561	1.49502	0.301998	0	0	0	0
18969	u	novel	-1.42835	-0.0004096	chr14	-	65563439	65563805	MSTRG.10469.1	1	367	MSTRG.10469	.	0	0	0	0	0	0	8.33787	1.68428	0	0	0	0
1926	u	novel	-1.0093	-0.0004096	chr1	-	118546480	118546722	MSTRG.1047.1	1	243	MSTRG.1047	.	11.1852	1.66916	0	0	0	0	0	0	0	0	0	0
18978	x	novel	-1.48084	-0.0004096	chr14	-	65837851	65838070	MSTRG.10478.1	1	220	MSTRG.10478	ENSSSCG00000010196	9.60909	1.43396	0	0	0	0	0	0	0	0	0	0
18979	i	novel	-1.11597	-0.0004096	chr14	-	65850752	65851093	MSTRG.10479.1	1	342	MSTRG.10479	ENSSSCG00000010196	9.67252	1.44343	0	0	0	0	0	0	0	0	0	0
1927	u	novel	-1.12214	-0.106496	chr1	-	118550072	118550309	MSTRG.1048.1	1	238	MSTRG.1048	.	12.0546	1.79891	0	0	0	0	0	0	0	0	0	0
18982	u	novel	-1.19846	-0.141312	chr14	+	65898579	65899777	MSTRG.10481.1	1	1199	MSTRG.10481	.	0	0	0	0	7.75146	1.01897	6.4854	1.31007	10.9942	1.36483	9.30109	1.52885
18983	u	novel	-1.27725	-0.0004096	chr14	+	65901000	65902439	MSTRG.10482.1	1	1440	MSTRG.10482	.	7.22431	1.07808	0	0	0	0	0	0	0	0	0	0
18991	u	novel	-1.38696	-0.024576	chr14	-	66460273	66460759	MSTRG.10484.1	1	487	MSTRG.10484	.	0	0	0	0	0	0	4.62012	0.933279	0	0	10.1294	1.665
18994	i	novel	-1.0322	-0.0004096	chr14	-	66467275	66467590	MSTRG.10486.1	1	316	MSTRG.10486	FXYD4	3.82279	0.570473	0	0	0	0	0.949367	0.191775	1.66456	0.206641	0	0
18995	u	novel	-1.24814	-0.0667648	chr14	-	66472922	66473273	MSTRG.10487.1	1	352	MSTRG.10487	.	9.86648	1.47237	19.4261	2.15935	14.3409	1.88518	0	0	5.95739	0.739559	7.22443	1.18751
19001	u	novel	-1.24405	-0.077824	chr14	-	66515049	66519305	MSTRG.10489.1	2	4135	MSTRG.10489	.	12.806	1.91104	3.18767	0.354331	13.7892	1.81266	3.39086	0.684964	21.2677	2.64021	18.1216	2.97872
1928	u	novel	-1.18189	-0.028672	chr1	-	118553701	118554351	MSTRG.1049.1	1	651	MSTRG.1049	.	9.97389	1.4884	9.57757	1.06461	7.32719	0.963195	5.71429	1.1543	8.06452	1.00114	0	0
19002	u	novel	-1.12434	-0.028672	chr14	+	66519924	66521007	MSTRG.10490.1	1	1084	MSTRG.10490	.	7.24354	1.08095	11.4483	1.27256	0	0	3.59779	0.726764	10.4354	1.29547	9.87915	1.62387
19004	u	novel	-1.09696	-0.121242	chr14	+	66523573	66523895	MSTRG.10492.1	1	323	MSTRG.10492	.	12.6223	1.88362	0	0	0	0	6.50155	1.31333	11.5542	1.43435	22.4396	3.68848
19005	u	novel	-1.42277	-0.0045056	chr14	+	66526712	66526962	MSTRG.10493.1	1	251	MSTRG.10493	.	4.81275	0.718205	0	0	0	0	0	0	0	0	8.42231	1.3844
19009	u	novel	-1.09136	-0.028672	chr14	+	66625615	66631865	MSTRG.10497.1	1	6251	MSTRG.10497	.	12.9288	1.92936	13.1445	1.4611	0	0	0	0	0	0	0	0
19010	u	novel	-1.05127	-0.0159744	chr14	+	66635782	66643074	MSTRG.10498.1	1	7293	MSTRG.10498	.	13.8515	2.06705	9.47415	1.05312	10.6589	1.40116	4.51392	0.911825	0	0	5.52473	0.908119
212	u	novel	-1.23069	-0.0004096	chr1	+	12208921	12209601	MSTRG.105.1	1	681	MSTRG.105	.	0	0	0	0	0	0	0	0	0	0	7.46843	1.22761
1929	u	novel	-1.34319	-0.0004096	chr1	-	118567556	118567780	MSTRG.1050.1	1	225	MSTRG.1050	.	0	0	12.6667	1.40799	0	0	0	0	0	0	0	0
19048	u	novel	-1.30782	-0.0401408	chr14	-	68881845	68882168	MSTRG.10505.1	1	324	MSTRG.10505	.	11.1852	1.66916	0	0	0	0	0	0	0	0	0	0
19043	i	novel	-1.09927	-0.057344	chr14	+	68578573	68578778	MSTRG.10508.1	1	206	MSTRG.10508	ANK3	31.3883	4.68407	27.4757	3.05411	17.1602	2.25579	5.81068	1.17378	16.5583	2.05557	14.5583	2.39299
19049	u	novel	-1.08034	-0.0004096	chr14	-	68898803	68899272	MSTRG.10509.1	1	470	MSTRG.10509	.	4.49787	0.671216	0	0	9.45106	1.24239	1.58936	0.321056	12.6468	1.56999	5.65106	0.928885
19051	u	novel	-1.34543	-0.0004096	chr14	-	68987937	68988385	MSTRG.10510.1	1	449	MSTRG.10510	.	10.4254	1.55578	0	0	0	0	0.668151	0.134969	0	0	4.03564	0.663351
19050	u	novel	-1.08383	-0.0004096	chr14	-	68907756	68908175	MSTRG.10511.1	1	420	MSTRG.10511	.	7.55	1.12668	0	0	0	0	0	0	0	0	0	0
19052	u	novel	-1.27283	-0.0004096	chr14	-	69029999	69030358	MSTRG.10512.1	1	360	MSTRG.10512	.	10.0667	1.50225	0	0	0	0	0	0	0	0	0	0
19054	u	novel	-1.41476	-0.0004096	chr14	-	69194227	69194506	MSTRG.10514.1	1	280	MSTRG.10514	.	0	0	0	0	0	0	0	0	0	0	8.62857	1.41831
19056	u	novel	-1.35969	-0.131072	chr14	-	69223789	69224033	MSTRG.10516.1	1	245	MSTRG.10516	.	2.46531	0.367897	6.22041	0.69144	5.49796	0.722734	2.44898	0.494701	4.25918	0.528741	11.0531	1.81683
19062	u	novel	-1.14576	-0.0004096	chr14	+	69290911	69291460	MSTRG.10519.1	1	550	MSTRG.10519	.	6.31455	0.942317	0	0	10.6364	1.3982	0	0	0	0	0	0
1931	u	novel	-1.28871	-0.0004096	chr1	-	118581160	118581929	MSTRG.1052.1	1	770	MSTRG.1052	.	0	0	0	0	3.65455	0.480408	6.6039	1.33401	4.48873	0.557237	0	0
19063	u	novel	-1.2035	-0.1024	chr14	+	69292653	69293967	MSTRG.10520.1	1	1315	MSTRG.10520	.	9.84639	1.46937	0	0	0	0	0	0	0	0	0	0
19066	u	novel	-1.06318	-0.26624	chr14	+	69298786	69300022	MSTRG.10523.1	1	1237	MSTRG.10523	.	9.63541	1.43789	17.1625	1.90773	0	0	3.654	0.738119	2.8941	0.359278	3.55699	0.584675
19067	u	novel	-1.08327	-0.012288	chr14	+	69301992	69307871	MSTRG.10524.1	1	5880	MSTRG.10524	.	1.40102	0.209074	12.9459	1.43903	6.98503	0.918217	2.95374	0.596665	1.65493	0.205446	5.71735	0.93978
19068	u	novel	-1.12822	-0.0217088	chr14	+	69308396	69312459	MSTRG.10525.1	1	4064	MSTRG.10525	.	10.6959	1.59614	13.2943	1.47775	4.9909	0.656078	2.71407	0.548251	1.7687	0.219569	3.43627	0.564831
19069	u	novel	-1.12935	-0.0004096	chr14	+	69315493	69315737	MSTRG.10526.1	1	245	MSTRG.10526	.	16.5184	2.46503	0	0	0	0	0	0	0	0	0	0
19072	u	novel	-1.28455	-0.0004096	chr14	+	69375732	69376078	MSTRG.10529.1	1	347	MSTRG.10529	.	9.13833	1.36371	6.317	0.702177	4.27666	0.562187	2.16138	0.436606	0	0	0	0
1932	u	novel	-1.02288	-0.004096	chr1	-	118584187	118584418	MSTRG.1053.1	1	232	MSTRG.1053	.	5.38362	0.803396	16.7802	1.86523	0	0	3.23276	0.653027	0	0	0	0
19075	i	novel	-1.15755	-0.06144	chr14	+	69419981	69420297	MSTRG.10532.1	1	317	MSTRG.10532	ENSSSCG00000028327	9.52681	1.42168	0	0	0	0	0	0	0.946372	0.117484	0	0
19077	i	novel	-1.19354	-0.14295	chr14	-	69456498	69456819	MSTRG.10534.1	1	322	MSTRG.10534	ENSSSCG00000010215	12.1801	1.81763	0	0	4.19255	0.551131	3.72671	0.752806	4.1118	0.510445	0	0
1938	u	novel	-1.19107	-0.0724992	chr1	+	118690771	118692016	MSTRG.1054.1	1	1246	MSTRG.1054	.	4.59865	0.686255	0	0	0	0	0	0	0	0	8.83226	1.45179
19087	u	novel	-1.09262	-0.024576	chr14	+	70571435	70574182	MSTRG.10542.1	1	2748	MSTRG.10542	.	0	0	0	0	8.33869	1.09616	0	0	0	0	0	0
19088	u	novel	-1.13371	-0.012288	chr14	+	70574602	70576906	MSTRG.10543.1	1	2305	MSTRG.10543	.	5.89328	0.879451	10.6304	1.18164	7.73276	1.01651	4.89588	0.988982	0	0	9.34143	1.53548
19089	u	novel	-1.18539	-0.0004096	chr14	+	70581164	70581988	MSTRG.10544.1	1	825	MSTRG.10544	.	9.51273	1.41958	0	0	7.09091	0.932135	0	0	0	0	6.34424	1.04282
19098	u	novel	-1.27092	-0.0004096	chr14	-	70803635	70803877	MSTRG.10548.1	1	243	MSTRG.10548	.	11.1605	1.66548	0	0	0	0	4.32099	0.872853	0	0	4.69136	0.771135
19099	u	novel	-1.10262	-0.0356352	chr14	-	70806147	70806667	MSTRG.10551.1	1	521	MSTRG.10551	.	1.40691	0.209953	5.47025	0.608055	9.48944	1.24743	0.575816	0.116317	0	0	0.869482	0.14292
19105	u	novel	-1.1515	-0.0897024	chr14	-	71117459	71117698	MSTRG.10554.1	1	240	MSTRG.10554	.	3.14583	0.469451	6.51458	0.72414	3.7125	0.488026	9.12292	1.84286	7.275	0.903129	20.1333	3.30938
19106	u	novel	-1.41118	-0.0274432	chr14	-	71446799	71447069	MSTRG.10555.1	1	271	MSTRG.10555	.	52.1877	7.78796	53.5775	5.9555	44.9456	5.90831	37.0221	7.47858	44.1208	5.47723	34.8708	5.73184
19109	u	novel	-1.17052	-0.016384	chr14	+	71615121	71629699	MSTRG.10556.2	3	4300	MSTRG.10556	.	13.2555	1.97812	11.1757	1.24225	4.19664	0.551669	6.92008	1.39788	12.6282	1.56769	11.3142	1.85976
19111	u	novel	-1.22563	-0.06144	chr14	+	71640749	71643081	MSTRG.10557.1	1	2333	MSTRG.10557	.	0	0	0	0	0	0	6.49164	1.31133	0	0	0	0
19112	u	novel	-1.07995	-0.049152	chr14	+	71643366	71644603	MSTRG.10558.1	1	1238	MSTRG.10558	.	8.72294	1.30172	7.84572	0.872105	4.08562	0.537075	4.27625	0.863816	10.9313	1.35703	6.53958	1.07493
19114	u	novel	-1.31529	-0.0004096	chr14	+	71652401	71652621	MSTRG.10560.1	1	221	MSTRG.10560	.	12.2986	1.83532	0	0	0	0	0	0	0	0	0	0
19115	u	novel	-1.22261	-0.02048	chr14	+	71653534	71657393	MSTRG.10561.1	1	3860	MSTRG.10561	.	0	0	7.08562	0.787614	0	0	0	0	7.55207	0.937526	8.04171	1.32184
19119	u	novel	-1.07557	-0.0004096	chr14	+	71676182	71676646	MSTRG.10565.1	1	465	MSTRG.10565	.	0	0	0	0	2.19355	0.288353	8.13978	1.64426	0	0	0	0
19120	u	novel	-1.32731	-0.131072	chr14	+	71679222	71680982	MSTRG.10566.1	1	1761	MSTRG.10566	.	13.5361	2.01998	0	0	0	0	0	0	0	0	0	0
19121	u	novel	-1.28786	-0.0004096	chr14	+	71681612	71681843	MSTRG.10567.1	1	232	MSTRG.10567	.	0	0	14.2241	1.58111	9.97541	1.31132	3.87931	0.783632	1.98258	0.246121	0	0
19123	u	novel	-1.1289	-0.2048	chr14	+	71689497	71693206	MSTRG.10571.1	1	3710	MSTRG.10571	.	0	0	7.53842	0.837946	7.11092	0.934765	4.85903	0.981539	10.5798	1.31339	5.51898	0.907174
19124	u	novel	-1.08607	-0.0004096	chr14	+	71694073	71694339	MSTRG.10572.1	1	267	MSTRG.10572	.	10.618	1.58452	0	0	0	0	0	0	0	0	0	0
19126	u	novel	-1.17346	-0.110592	chr14	+	71698189	71703097	MSTRG.10574.1	1	4909	MSTRG.10574	.	7.89567	1.17827	0.746181	0.082943	0.886739	0.116566	5.55633	1.1224	8.40008	1.0428	6.98941	1.14887
19127	u	novel	-1.1547	-0.0372736	chr14	+	71703608	71711640	MSTRG.10575.1	1	8033	MSTRG.10575	.	12.1758	1.81699	9.68341	1.07638	9.53604	1.25356	0	0	14.4378	1.79233	9.51575	1.56414
19130	u	novel	-1.33778	-0.0004096	chr14	+	71719977	71720332	MSTRG.10578.1	1	356	MSTRG.10578	.	9.33146	1.39253	0	0	4.12956	0.542851	0	0	0	0	0	0
19131	u	novel	-1.20228	-0.024576	chr14	+	71722585	71723557	MSTRG.10579.1	1	973	MSTRG.10579	.	6.10278	0.910715	0	0	0	0	5.80062	1.17174	13.8684	1.72165	0	0
19134	u	novel	-1.14999	-0.008192	chr14	+	71731752	71732659	MSTRG.10580.1	1	908	MSTRG.10580	.	0	0	0	0	6.77313	0.890361	9.73678	1.96686	11.9416	1.48245	0	0
19135	u	novel	-1.03737	-0.016384	chr14	+	71733747	71734764	MSTRG.10581.1	1	1018	MSTRG.10581	.	0	0	0	0	0	0	0	0	10.7564	1.33531	9.70825	1.59578
19140	u	novel	-1.06722	-0.086016	chr14	+	71755073	71756320	MSTRG.10586.1	1	1248	MSTRG.10586	.	12.4575	1.85903	6.3141	0.701855	6.09295	0.800948	5.94551	1.20101	8.16506	1.01362	5.79647	0.952786
19142	u	novel	-1.06232	-0.0925696	chr14	+	71777497	71777722	MSTRG.10588.1	1	226	MSTRG.10588	.	10.0221	1.4956	0	0	0	0	0	0	0	0	0	0
19143	u	novel	-1.22334	-0.0475136	chr14	+	71779585	71779956	MSTRG.10589.1	1	372	MSTRG.10589	.	0	0	0	0	0	0	18.1774	3.67189	8.89198	1.10386	0	0
19144	u	novel	-1.30508	-0.0004096	chr14	+	71783904	71784188	MSTRG.10590.1	1	285	MSTRG.10590	.	10.0667	1.50225	0	0	0	0	0	0	0	0	0	0
19145	u	novel	-1.35354	-0.0004096	chr14	+	71787064	71787658	MSTRG.10591.1	1	595	MSTRG.10591	.	9.6437	1.43912	0	0	0	0	0	0	3.23025	0.401008	0	0
19147	u	novel	-1.31863	-0.252314	chr14	+	71799573	71799973	MSTRG.10593.1	1	401	MSTRG.10593	.	2.25935	0.337162	0	0	8.24688	1.08409	0	0	5.41147	0.671788	9.03741	1.48551
19148	u	novel	-1.01611	-0.0004096	chr14	+	71809863	71810258	MSTRG.10594.1	1	396	MSTRG.10594	.	0	0	0	0	0	0	7.19697	1.45381	0	0	0	0
19163	u	novel	-1.0281	-0.0004096	chr14	-	71977302	71977793	MSTRG.10596.1	1	492	MSTRG.10596	.	7.33333	1.09435	0	0	0	0	0.609756	0.123173	0	0	0	0
19164	u	novel	-1.44415	-0.0004096	chr14	-	71979148	71979468	MSTRG.10597.1	1	321	MSTRG.10597	.	15.9751	2.38395	0	0	0	0	2.80374	0.566364	0	0	0	0
19166	u	novel	-1.08019	-0.0004096	chr14	-	71997535	71997886	MSTRG.10600.1	1	352	MSTRG.10600	.	9.86648	1.47237	0	0	0	0	0	0	0	0	0	0
19167	u	novel	-1.11765	-0.024576	chr14	-	71999700	72000438	MSTRG.10601.1	1	739	MSTRG.10601	.	0	0	0	0	10.3018	1.35422	0	0	0	0	0	0
19169	u	novel	-1.26679	-0.26624	chr14	-	72006090	72006572	MSTRG.10603.1	1	483	MSTRG.10603	.	4.37681	0.65315	0	0	8.62319	1.13356	8.38509	1.69381	0	0	1.86956	0.307307
19170	u	novel	-1.32734	-0.0004096	chr14	-	72008279	72008502	MSTRG.10604.1	1	224	MSTRG.10604	.	0	0	16.2723	1.80878	0	0	4.01786	0.811619	0	0	0	0
19171	u	novel	-1.19229	-0.421888	chr14	-	72009142	72009857	MSTRG.10605.1	1	716	MSTRG.10605	.	10.9665	1.63652	4.18575	0.465275	2.93296	0.385552	1.67598	0.338553	2.30447	0.28608	3.3743	0.554646
19172	u	novel	-1.35352	-0.0004096	chr14	-	72013087	72013415	MSTRG.10606.1	1	329	MSTRG.10606	.	0	0	0	0	0	0	0	0	0	0	8.72036	1.4334
19186	u	novel	-1.26016	-0.0004096	chr14	-	72070590	72070825	MSTRG.10607.1	1	236	MSTRG.10607	.	10.2373	1.52771	0	0	0	0	0	0	1.27119	0.157807	0	0
19187	u	novel	-1.04864	-0.0004096	chr14	-	72075556	72076356	MSTRG.10608.1	1	801	MSTRG.10608	.	5.65168	0.843399	1.81773	0.202053	2.99626	0.393872	6.74157	1.36182	0	0	3.57803	0.588133
19173	u	novel	-1.31995	-0.294912	chr14	-	72021796	72023372	MSTRG.10609.1	1	1577	MSTRG.10609	.	0	0	0	0	11.8548	1.55837	0	0	0	0	0	0
19174	u	novel	-1.39446	-0.045056	chr14	-	72024993	72025473	MSTRG.10610.1	1	481	MSTRG.10610	.	14.1185	2.1069	0	0	0	0	0	0	9.35551	1.16141	0	0
19175	u	novel	-1.26364	-0.105677	chr14	-	72031535	72032571	MSTRG.10611.1	1	1037	MSTRG.10611	.	14.8496	2.21599	0	0	4.29753	0.564931	0	0	0	0	0	0
19176	u	novel	-1.42605	-0.018432	chr14	-	72038893	72039705	MSTRG.10612.1	1	813	MSTRG.10612	.	11.5006	1.71623	0	0	0	0	7.37638	1.49005	0	0	0	0
19179	u	novel	-1.05797	-0.02048	chr14	-	72047357	72047842	MSTRG.10615.1	1	486	MSTRG.10615	.	12.8395	1.91603	0	0	0	0	0	0	0	0	0	0
19180	u	novel	-1.32577	-0.0004096	chr14	-	72048544	72049712	MSTRG.10616.1	1	1169	MSTRG.10616	.	11.7459	1.75284	0	0	0	0	0	0	0	0	0	0
19184	u	novel	-1.24495	-0.0004096	chr14	-	72057297	72057532	MSTRG.10620.1	1	236	MSTRG.10620	.	0	0	0	0	0	0	0	0	0	0	12.7373	2.09367
19185	u	novel	-1.29788	-0.0933888	chr14	-	72062612	72063148	MSTRG.10621.1	1	537	MSTRG.10621	.	12.0912	1.80437	0	0	0	0	0	0	0	0	1.40596	0.231102
19188	u	novel	-1.20269	-0.0004096	chr14	-	72132072	72133210	MSTRG.10622.1	1	1139	MSTRG.10622	.	9.93679	1.48286	0	0	0	0	0	0	0	0	4.23968	0.696891
19189	u	novel	-1.12234	-0.0004096	chr14	-	72136050	72136656	MSTRG.10623.1	1	607	MSTRG.10623	.	12.7364	1.90065	0	0	0	0	7.04212	1.42253	0	0	0	0
19190	u	novel	-1.22382	-0.0004096	chr14	-	72138858	72139395	MSTRG.10624.1	1	538	MSTRG.10624	.	9.40706	1.40381	5.85502	0.650825	8.63197	1.13471	3.34572	0.675847	7.2119	0.895296	1.96468	0.322942
19192	u	novel	-1.16895	-0.206848	chr14	-	72146696	72147199	MSTRG.10626.1	1	504	MSTRG.10626	.	11.6845	1.74368	0	0	0	0	0	0	6.52778	0.810368	0	0
19193	u	novel	-1.29402	-0.16384	chr14	-	72147782	72148184	MSTRG.10627.1	1	403	MSTRG.10627	.	0	0	0	0	0	0	0	0	13.4739	1.67268	0	0
19194	u	novel	-1.05272	-0.0004096	chr14	-	72148843	72149501	MSTRG.10628.1	1	659	MSTRG.10628	.	9.12747	1.36209	0	0	0	0	0	0	0	0	2.97876	0.489628
19195	u	novel	-1.39978	-0.0004096	chr14	-	72150900	72151361	MSTRG.10629.1	1	462	MSTRG.10629	.	12.5996	1.88023	6.85261	0.761713	0	0	1.94805	0.393512	0	0	0	0
1922	u	novel	-1.09013	-0.0004096	chr1	+	118410930	118411357	MSTRG.1063.1	1	428	MSTRG.1063	.	0	0	0	0	2.02804	0.266595	6.65888	1.34511	0	0	0	0
19196	u	novel	-1.25436	-0.0004096	chr14	-	72154014	72154444	MSTRG.10630.1	1	431	MSTRG.10630	.	11.9118	1.7776	6.96056	0.773713	0	0	1.39211	0.281211	0	0	1.75174	0.287939
19198	u	novel	-1.17795	-0.0004096	chr14	-	72165295	72165690	MSTRG.10632.1	1	396	MSTRG.10632	.	0	0	0	0	0	0	0	0	0	0	8.23737	1.354
19199	u	novel	-1.13479	-0.0004096	chr14	-	72169627	72169858	MSTRG.10633.1	1	232	MSTRG.10633	.	9.76293	1.45692	0	0	0	0	0	0	0	0	0	0
19201	u	novel	-1.05254	-0.0004096	chr14	-	72174557	72175838	MSTRG.10635.1	1	1282	MSTRG.10635	.	9.64977	1.44003	0	0	5.24883	0.689984	0	0	0	0	0	0
19203	u	novel	-1.1666	-0.0004096	chr14	-	72181147	72181414	MSTRG.10637.1	1	268	MSTRG.10637	.	20.6903	3.0876	0	0	8.93284	1.17426	0	0	0	0	0	0
19219	u	novel	-1.27396	-0.0004096	chr14	+	72273054	72273344	MSTRG.10638.1	1	291	MSTRG.10638	.	0	0	0	0	0	0	4.12371	0.833002	11.3402	1.40779	0	0
19204	u	novel	-1.23783	-0.172032	chr14	-	72188973	72190975	MSTRG.10639.1	1	2003	MSTRG.10639	.	10.4348	1.55719	0	0	5.22273	0.686554	2.39641	0.484081	0	0	5.18772	0.852723
19206	u	novel	-1.07419	-0.0004096	chr14	-	72197935	72198791	MSTRG.10641.1	1	857	MSTRG.10641	.	10	1.4923	0	0	0	0	2.10035	0.424277	0	0	0	0
19207	u	novel	-1.25731	-0.282624	chr14	-	72200098	72203743	MSTRG.10642.1	1	3646	MSTRG.10642	.	13.5334	2.01958	0	0	9.46998	1.24487	2.67416	0.540189	0	0	0	0
19210	u	novel	-1.16042	-0.0004096	chr14	-	72212135	72212879	MSTRG.10645.1	1	745	MSTRG.10645	.	9.01879	1.34587	10.4698	1.16379	3.97852	0.522996	3.42282	0.69142	0	0	0	0
19211	u	novel	-1.20629	-0.0004096	chr14	-	72216737	72217595	MSTRG.10646.1	1	859	MSTRG.10646	.	13.0012	1.94016	0	0	0	0	0	0	0	0	0	0
19212	u	novel	-1.06964	-0.004096	chr14	-	72218962	72227513	MSTRG.10647.1	1	8552	MSTRG.10647	.	0	0	0	0	11.5284	1.51546	0	0	0	0	0	0
19213	u	novel	-1.10908	-0.069632	chr14	-	72228388	72229360	MSTRG.10648.1	1	973	MSTRG.10648	.	15.1418	2.25961	0	0	0	0	0	0	0	0	0	0
19214	u	novel	-1.26276	-0.237568	chr14	-	72229772	72230260	MSTRG.10649.1	1	489	MSTRG.10649	.	0	0	11.638	1.29365	0	0	0	0	0	0	0	0
19215	u	novel	-1.09212	-0.077824	chr14	-	72231146	72232935	MSTRG.10650.1	1	1790	MSTRG.10650	.	0	0	6.72894	0.747967	10.8425	1.42529	0	0	0	0	0	0
19216	u	novel	-1.18504	-0.176128	chr14	-	72233494	72237510	MSTRG.10651.1	1	4017	MSTRG.10651	.	12.7827	1.90755	0	0	11.5365	1.51652	0	0	8.99975	1.11724	7.57107	1.24448
19218	u	novel	-1.00187	-0.2048	chr14	+	72253601	72255205	MSTRG.10653.1	2	1050	MSTRG.10653	.	17.1897	2.56521	32.1552	3.57427	23.9333	3.14615	17.1352	3.46137	22.419	2.78313	11.9213	1.95954
19223	u	novel	-1.16395	-0.038912	chr14	-	72419739	72419974	MSTRG.10655.1	1	236	MSTRG.10655	.	1.27966	0.190963	7.62712	0.847806	1.25848	0.165433	6.99153	1.41231	1.89407	0.235132	5.08475	0.835797
19231	u	novel	-1.3435	-0.094208	chr14	-	76931871	76932152	MSTRG.10656.1	1	282	MSTRG.10656	.	17.0922	2.55066	22.2234	2.47028	15.3262	2.01471	18.5745	3.7521	30.539	3.79116	23.4716	3.85811
19236	u	novel	-1.15199	-0.0004096	chr14	+	77085232	77086771	MSTRG.10658.1	1	1540	MSTRG.10658	.	9.2487	1.38018	0	0	0	0	0	0	0	0	0	0
19237	u	novel	-1.0049	-0.110592	chr14	+	77088815	77089414	MSTRG.10659.1	1	600	MSTRG.10659	.	11.8233	1.76439	0	0	5.39667	0.709418	0	0	12.295	1.52632	10.52	1.72921
19240	u	novel	-1.1383	-0.0004096	chr14	+	77178313	77178582	MSTRG.10662.1	1	270	MSTRG.10662	.	9.78519	1.46024	0	0	3.31481	0.435749	1.66667	0.336672	0	0	0	0
19241	u	novel	-1.28464	-0.0004096	chr14	+	77180887	77182219	MSTRG.10663.1	1	1333	MSTRG.10663	.	13.5011	2.01477	0	0	0	0	0	0	0	0	0	0
19278	u	novel	-1.14062	-0.0004096	chr14	-	77714563	77714903	MSTRG.10673.1	1	341	MSTRG.10673	.	15.4985	2.31284	0	0	0	0	0	0	0	0	3	0.49312
19283	u	novel	-1.28609	-0.126976	chr14	+	77885042	77886568	MSTRG.10676.1	1	1527	MSTRG.10676	.	0	0	0	0	3.83885	0.504636	0	0	3.71843	0.461611	0	0
19288	u	novel	-1.24061	-0.208896	chr14	+	77923471	77924146	MSTRG.10679.1	1	676	MSTRG.10679	.	9.8284	1.46669	1.10947	0.123325	0	0	0	0	0	0	0	0
19294	x	novel	-1.11354	-0.004096	chr14	-	78037568	78054811	MSTRG.10682.1	4	1354	MSTRG.10682	DDX21	2.9925	0.446569	10.2887	1.14366	5.10477	0.671047	5.60009	1.13123	12.0841	1.50014	11.0979	1.82421
19295	x	novel	-1.2611	-0.086016	chr14	-	78044276	78054824	MSTRG.10682.2	4	1770	MSTRG.10682	DDX21	13.3127	1.98665	10.6616	1.18511	12.1283	1.59433	11.3181	2.28628	17.1219	2.12554	14.8183	2.43573
19308	u	novel	-1.03755	-0.0004096	chr14	+	78358050	78358280	MSTRG.10688.1	1	231	MSTRG.10688	.	11.7662	1.75587	0	0	0	0	0	0	0	0	0	0
1947	u	novel	-1.16827	-0.0004096	chr1	+	118839925	118840598	MSTRG.1069.1	1	674	MSTRG.1069	.	1.39954	0.208852	0	0	0	0	7.86053	1.58785	0	0	0	0
214	u	novel	-1.2184	-0.0004096	chr1	+	12215688	12215959	MSTRG.107.1	1	272	MSTRG.107	.	0	0	0	0	0	0	6.61765	1.33678	0	0	0	0
19339	x	novel	-1.04494	-0.06144	chr14	-	79621022	79629368	MSTRG.10703.1	2	940	MSTRG.10703	SGPL1	10.6223	1.58517	5.12277	0.569431	5.00623	0.658093	3.74406	0.756312	3.13298	0.388933	2.02354	0.332617
19342	u	novel	-1.07372	-0.0638976	chr14	+	79636670	79636885	MSTRG.10706.1	1	216	MSTRG.10706	.	1.32407	0.197591	0	0	5.30556	0.697441	7.625	1.54027	0	0	0	0
19349	u	novel	-1.40394	-0.119194	chr14	+	79705699	79705962	MSTRG.10710.1	1	264	MSTRG.10710	.	21.1629	3.15813	10.1705	1.13051	18.8561	2.47872	11.3295	2.2886	18.1553	2.25383	16.0814	2.64336
19355	i	novel	-1.08738	-0.049152	chr14	+	80030354	80031018	MSTRG.10716.1	1	665	MSTRG.10716	UNC5B	10.218	1.52483	0	0	0	0	0	0	0	0	0	0
1950	i	novel	-1.0495	-0.0004096	chr1	-	118953472	118953806	MSTRG.1072.1	1	335	MSTRG.1072	ENSSSCG00000004560	9.34925	1.39519	0	0	0	0	0	0	0	0	0	0
19361	i	novel	-1.05023	-0.0004096	chr14	+	80049295	80049690	MSTRG.10722.1	1	396	MSTRG.10722	UNC5B	14.4899	2.16232	0	0	0	0	0	0	0	0	0	0
19367	i	novel	-1.14273	-0.159744	chr14	+	80502877	80503139	MSTRG.10726.1	1	263	MSTRG.10726	ENSSSCG00000010278	3.44487	0.514076	14.8289	1.64833	21.3916	2.81203	3.9924	0.806476	29.9087	3.71292	27.9049	4.58683
19375	u	novel	-1.02041	-0.0651264	chr14	-	80817677	80826318	MSTRG.10730.1	1	8642	MSTRG.10730	.	8.45407	1.2616	15.5494	1.72843	10.9267	1.43636	0	0	11.1727	1.387	9.66097	1.58801
19377	u	novel	-1.20517	-0.0004096	chr14	-	80979063	80979304	MSTRG.10731.1	1	242	MSTRG.10731	.	10.5248	1.57061	0	0	0	0	0	0	0	0	0	0
19385	u	novel	-1.26399	-0.004096	chr14	-	81123118	81124192	MSTRG.10734.1	1	1075	MSTRG.10734	.	0	0	1.81395	0.201633	8.92744	1.17356	3.34884	0.676475	14.0112	1.73937	7.53581	1.23869
19386	u	novel	-1.28652	-0.0876544	chr14	+	81124275	81124532	MSTRG.10735.1	1	258	MSTRG.10735	.	0	0	0	0	0	0	7.44961	1.50484	4.72732	0.586857	0	0
19387	u	novel	-1.02729	-0.0188416	chr14	+	81124944	81127187	MSTRG.10736.1	1	2244	MSTRG.10736	.	280.904	41.9192	374.335	41.6099	0	0	350.512	70.8044	711.114	88.2788	413.988	68.0487
1953	u	novel	-1.39693	-0.0004096	chr1	-	119118666	119118937	MSTRG.1074.1	1	272	MSTRG.1074	.	0	0	12.8566	1.4291	0	0	0	0	0	0	0	0
19398	u	novel	-1.352	-0.0004096	chr14	+	81545533	81545747	MSTRG.10742.1	1	215	MSTRG.10742	.	11.2372	1.67692	0	0	0	0	0	0	0	0	0	0
19399	u	novel	-1.46191	-0.14336	chr14	-	81573443	81574013	MSTRG.10743.1	1	571	MSTRG.10743	.	11.1436	1.66296	0	0	0	0	3.15236	0.636787	2.08757	0.259154	0	0
19401	u	novel	-1.05299	-0.024576	chr14	+	81585091	81589196	MSTRG.10745.2	2	2960	MSTRG.10745	.	52.2248	7.79349	59.143	6.57414	48.8969	6.42774	19.5192	3.94294	29.9031	3.71221	26.9421	4.42857
19405	u	novel	-1.22306	-0.0262144	chr14	+	81663891	81670838	MSTRG.10748.1	1	6948	MSTRG.10748	.	27.8847	4.16122	24.0477	2.67306	21.5573	2.83381	8.55872	1.72889	0	0	10.4688	1.72079
19408	u	novel	-1.33079	-0.0004096	chr14	+	81722063	81723993	MSTRG.10749.1	1	1931	MSTRG.10749	.	12.5748	1.87654	0	0	10.566	1.38896	1.29311	0.261213	5.78612	0.718298	6.3071	1.03672
19407	u	novel	-1.19118	-0.008192	chr14	+	81706964	81711428	MSTRG.10752.1	2	4343	MSTRG.10752	.	2.64946	0.395377	12.794	1.42214	13.1009	1.72217	1.39282	0.281354	5.62741	0.698596	6.02525	0.990392
19410	u	novel	-1.20639	-0.016384	chr14	+	81731865	81733154	MSTRG.10753.1	1	1290	MSTRG.10753	.	12.0527	1.79862	9.80775	1.0902	0	0	3.46279	0.699494	6.73566	0.836175	0	0
19412	u	novel	-1.21696	-0.237568	chr14	+	81738506	81740208	MSTRG.10755.1	1	1703	MSTRG.10755	.	10.3288	1.54137	0	0	0	0	0	0	0	0	0	0
19437	u	novel	-1.01802	-0.022528	chr14	-	82178024	82180727	MSTRG.10758.1	1	2704	MSTRG.10758	.	0	0	0	0	10.6807	1.40403	4.39331	0.887461	0	0	0	0
19438	u	novel	-1.16014	-0.032768	chr14	-	82185120	82188342	MSTRG.10759.1	1	3223	MSTRG.10759	.	11.4803	1.7132	0	0	6.94109	0.91244	4.24403	0.857306	0	0	0	0
19432	u	novel	-1.21705	-0.0004096	chr14	+	82091177	82092139	MSTRG.10767.1	1	963	MSTRG.10767	.	0	0	0	0	0	0	7.4839	1.51177	0	0	0	0
19443	u	novel	-1.2161	-0.0724992	chr14	-	82327061	82328133	MSTRG.10770.1	1	1073	MSTRG.10770	.	0	0	0	0	0	0	2.47717	0.500395	0	0	8.71668	1.43279
19459	u	novel	-1.13562	-0.0172032	chr14	+	82431239	82431575	MSTRG.10776.1	1	337	MSTRG.10776	.	11.4184	1.70396	0	0	0	0	0.747774	0.151053	0	0	0	0
19464	u	novel	-1.18261	-0.131072	chr14	-	82545287	82545608	MSTRG.10779.1	1	322	MSTRG.10779	.	0	0	20.4596	2.27422	0	0	0	0	8.38509	1.04094	0	0
19465	u	novel	-1.42003	-0.0004096	chr14	-	82545937	82546228	MSTRG.10780.1	1	292	MSTRG.10780	.	10.3425	1.5434	0	0	0	0	0	0	0	0	0	0
19466	u	novel	-1.43606	-0.0790528	chr14	-	82546648	82546988	MSTRG.10781.1	1	341	MSTRG.10781	.	17.2698	2.57716	0	0	0	0	0	0	0	0	0	0
19467	u	novel	-1.27129	-0.0004096	chr14	-	82547934	82548342	MSTRG.10782.1	1	409	MSTRG.10782	.	9.22983	1.37736	0	0	0	0	0	0	0	0	1.84597	0.303428
19468	u	novel	-1.03838	-0.0004096	chr14	-	82554800	82555056	MSTRG.10783.1	1	257	MSTRG.10783	.	9.40078	1.40287	2.33463	0.25951	0	0	0	0	0	0	0	0
19469	u	novel	-1.24992	-0.0004096	chr14	-	82556394	82556722	MSTRG.10784.1	1	329	MSTRG.10784	.	21.6505	3.23089	2.20223	0.244793	8.32458	1.09431	0	0	0	0	0	0
19471	u	novel	-1.46257	-0.0004096	chr14	+	82567038	82567243	MSTRG.10786.1	1	206	MSTRG.10786	.	5.86408	0.875094	14.5631	1.61879	0	0	4.97087	1.00413	18.2233	2.26227	4.09709	0.673452
19497	u	novel	-1.28044	-0.0004096	chr14	+	82774037	82774285	MSTRG.10789.1	1	249	MSTRG.10789	.	5.89157	0.879196	1.20482	0.133924	1.20482	0.158379	7.22892	1.46026	2.69076	0.334035	0	0
1965	u	novel	-1.15702	-0.0004096	chr1	+	119585982	119586550	MSTRG.1079.1	1	569	MSTRG.1079	.	0	0	0	0	0	0	0	0	14.7575	1.83201	0	0
19516	u	novel	-1.05866	-0.128205	chr14	-	83783308	83783523	MSTRG.10797.1	1	216	MSTRG.10797	.	13.8519	2.06711	0	0	0	0	0	0	0	0	8.38889	1.37891
19524	u	novel	-1.13673	-0.069632	chr14	-	83872315	83872575	MSTRG.10801.1	1	261	MSTRG.10801	.	20.7816	3.10123	8.47127	0.941638	10.0805	1.32513	12.6322	2.55174	12.069	1.49826	14.8621	2.44293
19525	u	novel	-1.20589	-0.0004096	chr14	-	83877216	83877452	MSTRG.10802.1	1	237	MSTRG.10802	.	80.4937	12.012	97.5696	10.8455	75.9156	9.97948	52.3122	10.5672	74.6709	9.26975	70.903	11.6546
19531	u	novel	-1.0505	-0.0729088	chr14	+	86025919	86026131	MSTRG.10804.1	1	213	MSTRG.10804	.	5.67136	0.846335	12.662	1.40746	5.6338	0.740591	5.6338	1.13804	22.0704	2.73986	14.8873	2.44708
19543	u	novel	-1.09346	-0.0004096	chr14	-	86909118	86909336	MSTRG.10805.1	1	219	MSTRG.10805	.	0	0	31.3059	3.47987	25.3425	3.33139	17.2877	3.49216	23.3333	2.89663	51.379	8.44534
19509	u	novel	-1.40102	-0.077824	chr14	+	83444477	83444940	MSTRG.10809.1	1	464	MSTRG.10809	.	9.28017	1.38488	2.90302	0.32269	0	0	0	0	0	0	0	0
1969	u	novel	-1.01334	-0.536576	chr1	+	119628860	119629777	MSTRG.1081.1	1	918	MSTRG.1081	.	4.1122	0.613662	8.4902	0.943743	0	0	2.12418	0.429091	6.51416	0.808678	0	0
19556	u	novel	-1.39438	-0.012288	chr14	-	87122781	87123080	MSTRG.10813.1	1	300	MSTRG.10813	.	51.0733	7.62165	73.9167	8.21633	35.9467	4.72537	12.47	2.51898	24.5	3.04147	13.59	2.23384
19547	u	novel	-1.27625	-0.0004096	chr14	-	87004886	87005205	MSTRG.10814.1	1	320	MSTRG.10814	.	8.02187	1.1971	0	0	6.89387	0.906233	0	0	15.8187	1.96376	0	0
19566	u	novel	-1.50936	-0.0540672	chr14	-	88438589	88438794	MSTRG.10817.1	1	206	MSTRG.10817	.	0	0	1.45631	0.161879	0.728155	0.09572	0	0	0	0	8.79612	1.44585
19572	u	novel	-1.29624	-0.0004096	chr14	+	88496267	88496623	MSTRG.10821.1	1	357	MSTRG.10821	.	4.61905	0.689299	0	0	0	0	0	0	11.7647	1.46049	0	0
19585	u	novel	-1.13603	-0.155648	chr14	-	88738906	88739606	MSTRG.10823.1	1	701	MSTRG.10823	.	0	0	6.97717	0.77556	0	0	6.80457	1.37454	0	0	0	0
19590	u	novel	-1.32503	-0.0004096	chr14	-	88756800	88757343	MSTRG.10828.1	1	544	MSTRG.10828	.	0	0	0	0	4.41176	0.579948	7.44485	1.50388	0	0	0	0
19591	u	novel	-1.0941	-0.016384	chr14	-	88757995	88762210	MSTRG.10829.1	1	4216	MSTRG.10829	.	7.26281	1.08383	0	0	0	0	1.34757	0.272213	9.67507	1.20108	12.5104	2.05638
1971	u	novel	-1.07522	-0.0004096	chr1	-	119636274	119636790	MSTRG.1083.1	1	517	MSTRG.1083	.	0	0	0	0	0	0	7.25338	1.46521	0	0	0	0
19592	u	novel	-1.02151	-0.0004096	chr14	-	88762583	88763305	MSTRG.10830.1	1	723	MSTRG.10830	.	0	0	13.6362	1.51576	9.95851	1.30909	0	0	0	0	0	0
19593	u	novel	-1.09751	-0.0249856	chr14	-	88763641	88764101	MSTRG.10831.1	1	461	MSTRG.10831	.	2.29284	0.34216	0	0	0	0	6.7679	1.36714	0	0	0	0
19594	u	novel	-1.21634	-0.0004096	chr14	-	88764731	88765331	MSTRG.10832.1	1	601	MSTRG.10832	.	13.0649	1.94967	0	0	3.69132	0.485242	0	0	0	0	0	0
19595	u	novel	-1.07644	-0.024576	chr14	-	88765702	88768487	MSTRG.10833.1	1	2786	MSTRG.10833	.	9.2308	1.37751	0	0	0	0	8.29505	1.67562	12.1637	1.51002	10.6339	1.74793
19602	i	novel	-1.19626	-0.086016	chr14	+	88807460	88808076	MSTRG.10837.1	1	617	MSTRG.10837	DYDC2	8.40032	1.25358	0	0	5.1799	0.680924	3.79579	0.76676	0	0	10.9481	1.79958
19607	u	novel	-1.07462	-0.06144	chr14	-	88842423	88856737	MSTRG.10842.1	3	2568	MSTRG.10842	.	2.36838	0.353432	3.28492	0.365141	3.37119	0.443159	4.69335	0.948072	13.0239	1.61681	1.80883	0.297323
19623	u	novel	-1.09647	-0.0004096	chr14	-	89099725	89100242	MSTRG.10846.1	1	518	MSTRG.10846	.	9.61969	1.43554	0	0	0	0	0	0	0	0	0	0
19626	u	novel	-1.18403	-0.0004096	chr14	-	89165015	89165381	MSTRG.10848.1	1	367	MSTRG.10848	.	7.68392	1.14667	0	0	0	0	0	0	1.22616	0.152217	0	0
19629	u	novel	-1.15002	-0.0004096	chr14	-	89179014	89179289	MSTRG.10851.1	1	276	MSTRG.10851	.	9.84783	1.46959	0	0	0.543478	0.071443	0	0	4.34783	0.539746	0	0
19630	u	novel	-1.14591	-0.0221184	chr14	-	89180070	89181161	MSTRG.10852.1	1	1092	MSTRG.10852	.	3.73352	0.557151	7.92582	0.881009	0	0	0	0	4.25824	0.528625	8.00183	1.31529
19632	u	novel	-1.17744	-0.075776	chr14	-	89191403	89191760	MSTRG.10854.1	1	358	MSTRG.10854	.	0	0	0	0	0	0	4.82682	0.975031	0	0	0	0
19634	u	novel	-1.1261	-0.012288	chr14	-	89205479	89208879	MSTRG.10856.1	1	3401	MSTRG.10856	.	0	0	0	0	0	0	0	0	5.44075	0.675423	8.44399	1.38797
19635	u	novel	-1.08967	-0.0208896	chr14	-	89210918	89213150	MSTRG.10857.1	1	2233	MSTRG.10857	.	9.58979	1.43108	0	0	0	0	0	0	0	0	0	0
19636	u	novel	-1.02744	-0.161382	chr14	-	89216335	89217956	MSTRG.10858.1	1	1622	MSTRG.10858	.	9.78052	1.45954	0	0	0	0	0	0	0	0	5.02713	0.826326
19637	u	novel	-1.26425	-0.065536	chr14	-	89218929	89221553	MSTRG.10859.1	1	2625	MSTRG.10859	.	10.6766	1.59326	0	0	0	0	0	0	0	0	0	0
19639	u	novel	-1.24524	-0.0004096	chr14	-	89245940	89246409	MSTRG.10861.1	1	470	MSTRG.10861	.	11.2255	1.67518	0	0	0.319149	0.041954	0	0	0	0	0	0
19641	u	novel	-1.05131	-0.0004096	chr14	-	89255950	89256334	MSTRG.10863.1	1	385	MSTRG.10863	.	0	0	1.94805	0.216539	0	0	0	0	11.2987	1.40264	6.26753	1.03022
19642	u	novel	-1.17077	-0.032768	chr14	-	89261972	89263522	MSTRG.10864.1	1	1551	MSTRG.10864	.	1.73718	0.259239	0	0	0	0	0	0	3.33508	0.414021	0	0
19643	u	novel	-1.21359	-0.0004096	chr14	-	89273828	89275564	MSTRG.10865.1	1	1737	MSTRG.10865	.	13.7835	2.05691	0	0	0	0	6.18307	1.249	0	0	9.38572	1.54276
19644	u	novel	-1.08704	-0.0004096	chr14	-	89280613	89280905	MSTRG.10866.1	1	293	MSTRG.10866	.	11.3379	1.69195	2.55973	0.284531	0	0	0	0	0	0	0	0
19646	u	novel	-1.2222	-0.0602112	chr14	-	89284035	89284577	MSTRG.10868.1	1	543	MSTRG.10868	.	0	0	0	0	0	0	8.01105	1.61826	0	0	0	0
19647	u	novel	-1.16591	-0.178586	chr14	-	89286643	89287447	MSTRG.10869.1	1	805	MSTRG.10869	.	11.8919	1.77463	0	0	0	0	0	0	0	0	0	0
19648	u	novel	-1.21442	-0.0679936	chr14	-	89287891	89288501	MSTRG.10870.1	1	611	MSTRG.10870	.	9.13584	1.36334	0	0	0	0	5.40098	1.09102	5.73813	0.712341	7.41408	1.21868
19649	u	novel	-1.15974	-0.0004096	chr14	-	89294070	89294843	MSTRG.10871.1	1	774	MSTRG.10871	.	9.93411	1.48246	0	0	0	0	0	0	0	0	0	0
19650	u	novel	-1.01747	-0.126976	chr14	-	89295659	89297805	MSTRG.10872.1	1	2147	MSTRG.10872	.	10.3037	1.53761	0	0	0	0	3.02003	0.610055	0	0	0	0
19651	u	novel	-1.06791	-0.0520192	chr14	-	89298620	89299357	MSTRG.10873.1	1	738	MSTRG.10873	.	13.4173	2.00226	5.72974	0.636899	0	0	0	0	0	0	5.64228	0.92744
19653	u	novel	-1.27876	-0.0270336	chr14	-	89305309	89305522	MSTRG.10875.1	1	214	MSTRG.10875	.	0	0	0	0	0	0	0	0	13.2897	1.64981	0	0
19654	u	novel	-1.05868	-0.0004096	chr14	+	89308007	89308490	MSTRG.10876.1	1	484	MSTRG.10876	.	11.186	1.66928	0	0	0	0	0	0	0	0	0	0
19655	u	novel	-1.24459	-0.0004096	chr14	+	89396440	89396948	MSTRG.10877.1	1	509	MSTRG.10877	.	5.33988	0.796869	0	0	0	0	4.12574	0.833411	0	0	0	0
19656	u	novel	-1.30745	-0.0004096	chr14	+	89520993	89521377	MSTRG.10878.1	1	385	MSTRG.10878	.	0	0	0	0	0	0	0	0	0	0	12.3532	2.03055
19657	u	novel	-1.32879	-0.12288	chr14	+	89730102	89730315	MSTRG.10879.1	1	214	MSTRG.10879	.	0	0	0	0	4.90654	0.644989	2.80374	0.566364	20.1589	2.50255	0	0
19658	u	novel	-1.22796	-0.0004096	chr14	+	90121302	90121531	MSTRG.10880.1	1	230	MSTRG.10880	.	9.1913	1.37162	0	0	0	0	0	0	0	0	0	0
19680	u	novel	-1.01881	-0.008192	chr14	+	92547597	92547875	MSTRG.10885.1	1	279	MSTRG.10885	.	11.9068	1.77685	0	0	0	0	0	0	0	0	0	0
19681	u	novel	-1.28612	-0.0004096	chr14	+	92810961	92811201	MSTRG.10886.1	1	241	MSTRG.10886	.	12.5311	1.87001	0	0	1.24481	0.163637	0	0	0	0	0	0
19700	u	novel	-1.18043	-0.069632	chr14	+	94997803	94998064	MSTRG.10889.1	1	262	MSTRG.10889	.	11.4427	1.7076	0	0	0	0	0	0	0	0	0	0
19701	u	novel	-1.08288	-0.0458752	chr14	+	94998534	95000619	MSTRG.10890.1	1	2086	MSTRG.10890	.	14.5872	2.17685	0	0	0	0	0	0	0	0	0	0
19702	u	novel	-1.37496	-0.111821	chr14	+	95002640	95002979	MSTRG.10891.1	1	340	MSTRG.10891	.	0	0	0	0	12.2471	1.60994	0	0	0	0	0	0
19703	u	novel	-1.14435	-0.0004096	chr14	+	95005919	95006593	MSTRG.10892.1	1	675	MSTRG.10892	.	0	0	0	0	10.2121	1.34243	8.87111	1.79199	4.88889	0.606914	4.73016	0.777512
19704	u	novel	-1.24747	-0.028672	chr14	+	95007356	95009947	MSTRG.10893.1	1	2592	MSTRG.10893	.	9.76234	1.45683	0	0	0	0	0	0	0	0	4.23958	0.696875
19705	u	novel	-1.08837	-0.0892928	chr14	+	95012774	95013279	MSTRG.10894.1	1	506	MSTRG.10894	.	0	0	0	0	0	0	6.52174	1.31741	0	0	0	0
19711	u	novel	-1.14266	-0.032768	chr14	+	95040399	95041947	MSTRG.10895.1	1	1549	MSTRG.10895	.	0	0	0	0	10.6449	1.39933	0	0	5.03034	0.624474	4.19948	0.690283
19706	u	novel	-1.06328	-0.0057344	chr14	+	95018197	95021536	MSTRG.10896.1	1	3340	MSTRG.10896	.	13.0886	1.95321	0	0	0	0	0	0	0	0	4.28742	0.704739
19708	u	novel	-1.52344	-0.0004096	chr14	+	95025989	95026296	MSTRG.10898.1	1	308	MSTRG.10898	.	11.7662	1.75587	0	0	0	0	2.92208	0.590269	0	0	0	0
19709	u	novel	-1.26584	-0.0004096	chr14	+	95037795	95038846	MSTRG.10899.1	1	1052	MSTRG.10899	.	12.5228	1.86878	5.56084	0.618124	5.96578	0.784231	0	0	0	0	3.30133	0.542651
216	u	novel	-1.17062	-0.139264	chr1	+	12249484	12250019	MSTRG.109.1	1	536	MSTRG.109	.	0	0	0	0	0	0	0	0	0	0	10.3377	1.69924
19712	u	novel	-1.07494	-0.0004096	chr14	+	95050008	95050492	MSTRG.10901.1	1	485	MSTRG.10901	.	13.0763	1.95137	1.85567	0.20627	0	0	0	0	0	0	0	0
19714	u	novel	-1.24879	-0.0004096	chr14	+	95054652	95055168	MSTRG.10903.1	1	517	MSTRG.10903	.	0	0	0	0	13.6132	1.78952	0	0	0	0	0	0
19715	u	novel	-1.24879	-0.0004096	chr14	+	95057356	95057740	MSTRG.10904.1	1	385	MSTRG.10904	.	12.5506	1.87293	0	0	0	0	0	0	0	0	0	0
19717	u	novel	-1.23464	-0.0004096	chr14	+	95075749	95076349	MSTRG.10906.1	1	601	MSTRG.10906	.	11.0549	1.64972	0	0	0	0	0	0	0.449251	0.055771	0	0
19718	u	novel	-1.2587	-0.065536	chr14	+	95087343	95087652	MSTRG.10907.1	1	310	MSTRG.10907	.	8.33548	1.2439	6.05161	0.672678	8.73871	1.14875	10.1516	2.05066	0	0	0	0
19719	u	novel	-1.39759	-0.131072	chr14	+	95094156	95094417	MSTRG.10908.1	1	262	MSTRG.10908	.	8.78626	1.31117	0	0	0	0	0	0	0	0	4.61069	0.757874
19720	u	novel	-1.0055	-0.0004096	chr14	+	95094943	95095253	MSTRG.10909.1	1	311	MSTRG.10909	.	0	0	0	0	0	0	8.68167	1.75372	0	0	0	0
1983	u	novel	-1.08252	-0.032768	chr1	-	120036768	120037173	MSTRG.1091.1	1	406	MSTRG.1091	.	0.743842	0.111003	0	0	1.47783	0.194268	1.10837	0.223895	3.32512	0.412786	10.835	1.78098
19725	u	novel	-1.32171	-0.057344	chr14	-	95219340	95219617	MSTRG.10913.1	1	278	MSTRG.10913	.	0	0	1.62015	0.18009	0	0	0	0	0	0	10.3201	1.69636
19737	u	novel	-1.23785	-0.016384	chr14	+	95630321	95630676	MSTRG.10916.1	1	356	MSTRG.10916	.	10.3792	1.54889	0.842697	0.093671	5.05618	0.66466	0.842697	0.170227	0	0	0.848315	0.13944
19739	u	novel	-1.10196	-0.004096	chr14	+	95654293	95654601	MSTRG.10918.1	1	309	MSTRG.10918	.	6.35275	0.948019	0	0	0	0	0	0	0	0	0	0
1984	u	novel	-1.25242	-0.002048	chr1	-	120040831	120041597	MSTRG.1092.1	1	767	MSTRG.1092	.	0	0	0	0	5.08475	0.668415	0	0	0	0	0	0
19755	u	novel	-1.39911	-0.158925	chr14	-	95869934	95870171	MSTRG.10920.1	1	238	MSTRG.10920	.	10.7857	1.60955	10.7143	1.19097	11.3445	1.4913	0.630252	0.127313	10.0714	1.25028	3.80672	0.625724
19756	u	novel	-1.43379	-0.0004096	chr14	-	96068170	96068743	MSTRG.10921.1	1	574	MSTRG.10921	.	0	0	0	0	0	0	7.31707	1.47807	0	0	0	0
19758	u	novel	-1.04785	-0.0004096	chr14	-	96076895	96077237	MSTRG.10924.1	1	343	MSTRG.10924	.	9.68513	1.44531	0	0	0	0	0	0	0	0	10.8484	1.78319
19759	u	novel	-1.1706	-0.0208896	chr14	-	96086557	96086885	MSTRG.10925.1	1	329	MSTRG.10925	.	9.17933	1.36983	0	0	0	0	0	0	0	0	0	0
19773	u	novel	-1.14416	-0.0004096	chr14	-	96821236	96821729	MSTRG.10928.1	1	494	MSTRG.10928	.	12.7935	1.90917	0	0	0	0	0	0	0	0	8.83198	1.45174
19774	u	novel	-1.20674	-0.0004096	chr14	-	96841205	96841415	MSTRG.10929.1	1	211	MSTRG.10929	.	11.0995	1.65638	0	0	0	0	0	0	0	0	0	0
1985	u	novel	-1.20074	-0.0364544	chr1	-	120049073	120049313	MSTRG.1093.1	1	241	MSTRG.1093	.	0	0	0	0	0	0	4.97925	1.00582	0	0	8.77178	1.44185
19778	u	novel	-1.17941	-0.0004096	chr14	-	96940302	96940674	MSTRG.10932.1	1	373	MSTRG.10932	.	11.3298	1.69074	2.14194	0.238091	0	0	0	0	0	0	12.1448	1.99628
19781	i	novel	-1.29596	-0.0004096	chr14	+	96986244	96986527	MSTRG.10934.1	1	284	MSTRG.10934	ENSSSCG00000010381	11.1655	1.66622	0	0	2.11268	0.277722	1.05634	0.213383	0	0	0	0
1986	u	novel	-1.2162	-0.04096	chr1	-	120055378	120056606	MSTRG.1094.1	1	1229	MSTRG.1094	.	10.2783	1.53382	0	0	0	0	0	0	4.11554	0.510909	0	0
19813	i	novel	-1.11498	-0.178995	chr14	-	98598070	98598387	MSTRG.10942.1	1	318	MSTRG.10942	MSMB	10.3522	1.54486	0.943396	0.104865	0	0	0	0	0	0	0	0
19814	i	novel	-1.41802	-0.0004096	chr14	-	98602775	98603049	MSTRG.10943.1	1	275	MSTRG.10943	MSMB	12.0218	1.79401	0	0	6.54545	0.860432	1.09091	0.220367	4.35273	0.540354	0	0
19815	i	novel	-1.08154	-0.049152	chr14	-	98607481	98612178	MSTRG.10944.1	1	4698	MSTRG.10944	MSMB	7.308	1.09057	8.37016	0.930399	4.14517	0.544903	3.22252	0.650959	5.76458	0.715624	7.02086	1.15404
19816	i	novel	-1.39706	-0.0872448	chr14	-	98615315	98615736	MSTRG.10945.1	1	422	MSTRG.10945	MSMB	0	0	10.4628	1.16301	0	0	0	0	0	0	13.1777	2.16607
19817	i	novel	-1.22663	-0.028672	chr14	-	98619990	98620365	MSTRG.10946.1	1	376	MSTRG.10946	MSMB	13.2527	1.97769	0	0	0	0	0	0	0	0	0	0
19825	i	novel	-1.52567	-0.0004096	chr14	+	98770345	98770584	MSTRG.10950.1	1	240	MSTRG.10950	MARCH8	0	0	0	0	0	0	0	0	0	0	8.80833	1.44786
19826	i	novel	-1.35621	-0.016384	chr14	+	98777663	98777993	MSTRG.10951.1	1	331	MSTRG.10951	MARCH8	0	0	0	0	0	0	0	0	0	0	9.10574	1.49674
19827	i	novel	-1.1167	-0.0004096	chr14	+	98828802	98829054	MSTRG.10952.1	1	253	MSTRG.10952	MARCH8	9.54941	1.42505	0	0	0	0	0	0	0	0	0	0
19860	u	novel	-1.07159	-0.0004096	chr14	+	100634582	100638689	MSTRG.10959.1	3	763	MSTRG.10959	.	9.55701	1.42619	8.69418	0.966417	4.44242	0.583978	4.31821	0.872292	5.41908	0.672733	4.5971	0.755641
19861	u	novel	-1.24116	-0.028672	chr14	-	100673101	100673426	MSTRG.10960.1	1	326	MSTRG.10960	.	7.98773	1.19201	0	0	0	0	9.28834	1.87627	0	0	5.88037	0.966576
19863	x	novel	-1.17201	-0.0004096	chr14	+	100716505	100716745	MSTRG.10961.1	1	241	MSTRG.10961	ZNF32	10.6515	1.58951	0	0	0	0	0	0	0	0	1.25311	0.205978
19865	x	novel	-1.15844	-0.0004096	chr14	+	100717275	100717649	MSTRG.10963.1	1	375	MSTRG.10963	ZNF32	11.6773	1.7426	0	0	0	0	2.8	0.565609	3.6	0.446909	0	0
19867	u	novel	-1.1788	-0.0004096	chr14	+	100767182	100767402	MSTRG.10965.1	1	221	MSTRG.10965	.	11.6154	1.73336	0	0	0	0	0	0	0	0	0	0
19872	u	novel	-1.29955	-0.21463	chr14	+	101155185	101155393	MSTRG.10969.1	1	209	MSTRG.10969	.	14.7871	2.20667	0	0	6.41627	0.84345	0	0	0	0	1.42823	0.234763
19873	u	novel	-1.37976	-0.032768	chr14	+	101784184	101784425	MSTRG.10970.1	1	242	MSTRG.10970	.	42.657	6.36569	90.3719	10.0454	75.2149	9.88736	26.5992	5.37311	45.4545	5.6428	36.5744	6.01186
19877	u	novel	-1.53471	-0.196608	chr14	+	104052514	104052728	MSTRG.10972.1	1	215	MSTRG.10972	.	14.0465	2.09616	4.88372	0.542858	0	0	2.7907	0.563729	0	0	3.51163	0.577218
19879	i	novel	-1.10639	-0.0004096	chr14	-	104841935	104842159	MSTRG.10975.1	1	225	MSTRG.10975	PCDH15	16.1067	2.40359	0	0	0	0	0	0	0	0	0	0
19880	u	novel	-1.29693	-0.0004096	chr14	-	104859939	104861182	MSTRG.10976.1	1	1244	MSTRG.10976	.	3.07556	0.458965	5.78537	0.643083	4.44373	0.58415	0	0	0	0	9.68167	1.59141
19881	u	novel	-1.03702	-0.0004096	chr14	-	104861680	104862030	MSTRG.10977.1	1	351	MSTRG.10977	.	9.03419	1.34817	0	0	0	0	0	0	0	0	0	0
19882	u	novel	-1.21245	-0.0004096	chr14	-	104864125	104864827	MSTRG.10978.1	1	703	MSTRG.10978	.	11.3883	1.69948	0	0	0	0	0	0	11.8805	1.47487	0	0
1996	u	novel	-1.48167	-0.0729088	chr1	-	120264105	120264337	MSTRG.1098.1	1	233	MSTRG.1098	.	0	0	0	0	15.4378	2.02937	1.28755	0.26009	0	0	5.83262	0.958727
19892	u	novel	-1.17731	-0.176128	chr14	-	106857392	106857643	MSTRG.10982.1	1	252	MSTRG.10982	.	0.599206	0.089419	0	0	0	0	8.33333	1.68336	0	0	0	0
19897	u	novel	-1.39413	-0.0004096	chr14	+	107204473	107204687	MSTRG.10985.1	1	215	MSTRG.10985	.	0.702326	0.104808	0	0	2.7907	0.366851	2.76279	0.558092	6.97674	0.866103	18.2605	3.00154
19898	u	novel	-1.2658	-0.0004096	chr14	-	107334114	107334715	MSTRG.10986.1	1	602	MSTRG.10986	.	0	0	0	0	1.49502	0.196527	8.34884	1.68649	0	0	2.37541	0.390455
19900	u	novel	-1.21255	-0.0978944	chr14	-	107367480	107367845	MSTRG.10988.1	1	366	MSTRG.10988	.	0	0	0	0	0	0	0.409836	0.082788	7.2541	0.900535	0	0
19901	u	novel	-1.1147	-0.0004096	chr14	-	107372571	107372853	MSTRG.10989.1	1	283	MSTRG.10989	.	0	0	0	0	0	0	0	0	8.46997	1.05147	0	0
19902	u	novel	-1.12661	-0.188416	chr14	-	107373515	107374594	MSTRG.10990.1	1	1080	MSTRG.10990	.	3.57407	0.533358	4.30556	0.478591	4.3	0.565256	6.35556	1.28384	0	0	0	0
19904	u	novel	-1.14024	-0.0004096	chr14	-	107389530	107390042	MSTRG.10992.1	1	513	MSTRG.10992	.	5.29824	0.790655	4.38596	0.48753	3.16569	0.416146	3.74269	0.756035	14.2885	1.7738	4.41521	0.725742
19906	u	novel	-1.33659	-0.0004096	chr14	-	107397630	107398222	MSTRG.10994.1	1	593	MSTRG.10994	.	9.91062	1.47896	0	0	0	0	0	0	0	0	0	0
19908	u	novel	-1.32339	-0.002048	chr14	-	107407683	107408379	MSTRG.10996.1	1	697	MSTRG.10996	.	0	0	0	0	0	0	0	0	0	0	9.48637	1.55931
19909	u	novel	-1.0807	-0.0004096	chr14	-	107414585	107414823	MSTRG.10997.1	1	239	MSTRG.10997	.	11.1632	1.66588	3.76569	0.418582	0	0	0	0	0	0	0	0
19910	u	novel	-1.33468	-0.0004096	chr14	-	107415893	107416266	MSTRG.10998.1	1	374	MSTRG.10998	.	9.68984	1.44601	0.802139	0.089163	0	0	1.20321	0.243052	0	0	0	0
19912	u	novel	-1.21901	-0.0004096	chr14	-	107429399	107429726	MSTRG.11000.1	1	328	MSTRG.11000	.	11.5091	1.71751	0	0	0	0	0	0	0	0	0	0
19915	u	novel	-1.12936	-0.02048	chr14	-	107457210	107459429	MSTRG.11003.1	1	2220	MSTRG.11003	.	4.21712	0.629319	0	0	0	0	3.51081	0.709195	10.2856	1.27687	5.5	0.904054
19916	u	novel	-1.16816	-0.106496	chr14	-	107462344	107462961	MSTRG.11004.1	1	618	MSTRG.11004	.	0	0	0	0	2.18447	0.287159	0	0	11.1408	1.38303	0	0
19917	u	novel	-1.16371	-0.0004096	chr14	-	107476795	107477209	MSTRG.11005.1	1	415	MSTRG.11005	.	10.5518	1.57464	0	0	0	0	0	0	0	0	0	0
19918	u	novel	-1.21874	-0.028672	chr14	-	107478908	107479393	MSTRG.11006.1	1	486	MSTRG.11006	.	0	0	0	0	0	0	6.79012	1.37163	0	0	0	0
19919	u	novel	-1.36784	-0.0004096	chr14	-	107482656	107483323	MSTRG.11007.1	1	668	MSTRG.11007	.	0	0	6.26946	0.696893	0	0	3.76347	0.760233	16.9192	2.10037	4.03443	0.663153
19920	u	novel	-1.15632	-0.069632	chr14	-	107483703	107487294	MSTRG.11008.1	1	3592	MSTRG.11008	.	0	0	0	0	3.7665	0.495124	2.83241	0.572154	11.8859	1.47553	0	0
19921	u	novel	-1.1745	-0.0004096	chr14	-	107493852	107497006	MSTRG.11009.1	1	3155	MSTRG.11009	.	4.4878	0.669712	0	0	0	0	0	0	14.3468	1.78103	0	0
19929	u	novel	-1.43418	-0.0004096	chr14	-	108116609	108117025	MSTRG.11014.1	1	417	MSTRG.11014	.	12.2638	1.83012	2.86728	0.318717	0	0	0	0	9.70504	1.2048	0	0
19930	u	novel	-1.07643	-0.233472	chr14	-	108117515	108117869	MSTRG.11015.1	1	355	MSTRG.11015	.	8.50704	1.2695	0	0	7.58028	0.996465	1.26761	0.25606	2.53521	0.314725	0	0
19931	u	novel	-1.38799	-0.0004096	chr14	-	108122495	108122863	MSTRG.11016.1	1	369	MSTRG.11016	.	0	0	3.25203	0.361485	10.523	1.3833	1.62602	0.32846	0	0	0	0
19933	u	novel	-1.37315	-0.0004096	chr14	-	108126292	108127010	MSTRG.11018.1	1	719	MSTRG.11018	.	12.395	1.8497	0	0	12.1001	1.59062	7.48818	1.51263	11.4186	1.41753	0	0
19934	u	novel	-1.0666	-0.012288	chr14	-	108128849	108131964	MSTRG.11019.1	1	3116	MSTRG.11019	.	11.3495	1.69368	9.41335	1.04636	0	0	4.80642	0.970912	6.74904	0.837836	5.65725	0.929902
19935	u	novel	-1.13097	-0.08192	chr14	-	108133289	108133915	MSTRG.11020.1	1	627	MSTRG.11020	.	0	0	0	0	0	0	0	0	0	0	9.874	1.62302
19936	u	novel	-1.1333	-0.0004096	chr14	-	108138812	108139112	MSTRG.11021.1	1	301	MSTRG.11021	.	0	0	0	0	0	0	6.97674	1.40932	0	0	0	0
19937	u	novel	-1.20352	-0.077824	chr14	-	108141092	108141910	MSTRG.11022.1	1	819	MSTRG.11022	.	10.3248	1.54076	9.37729	1.04235	0	0	0	0	0	0	0	0
19938	u	novel	-1.22669	-0.0004096	chr14	-	108143952	108144194	MSTRG.11023.1	1	243	MSTRG.11023	.	10.3128	1.53897	0	0	0.617284	0.081145	0	0	0	0	0	0
19939	u	novel	-1.23268	-0.053248	chr14	-	108150785	108186738	MSTRG.11024.1	3	524	MSTRG.11024	.	8.53626	1.27386	9.90304	1.10079	7.02004	0.922818	8.33206	1.6831	6.52428	0.809934	10.6527	1.75102
19940	u	novel	-1.17055	-0.0004096	chr14	-	108222417	108222769	MSTRG.11025.1	1	353	MSTRG.11025	.	0	0	0	0	0	0	1.69972	0.343348	0	0	12.8329	2.10938
19942	u	novel	-1.20387	-0.0004096	chr14	-	108289925	108290465	MSTRG.11027.1	1	541	MSTRG.11027	.	8.60813	1.28459	0	0	0	0	0	0	0	0	0	0
19943	u	novel	-1.10071	-0.0004096	chr14	-	108294411	108294800	MSTRG.11028.1	1	390	MSTRG.11028	.	9.25641	1.38133	0	0	0	0	0	0	0	0	0	0
19944	u	novel	-1.16189	-0.057344	chr14	-	108298707	108299081	MSTRG.11029.1	1	375	MSTRG.11029	.	0	0	0	0	1.952	0.2566	0.4	0.080801	0	0	7.64267	1.25625
19945	u	novel	-1.28791	-0.0004096	chr14	-	108303041	108303436	MSTRG.11030.1	1	396	MSTRG.11030	.	10.6212	1.585	0	0	0	0	0	0	0	0	0	0
19946	u	novel	-1.05581	-0.008192	chr14	-	108305282	108305739	MSTRG.11031.1	1	458	MSTRG.11031	.	9.89083	1.47601	0	0	0	0	0	0	0	0	0	0
19947	u	novel	-1.22622	-0.0782336	chr14	-	108310090	108310475	MSTRG.11032.1	1	386	MSTRG.11032	.	2.34715	0.350264	0	0	0	0	1.1658	0.235496	0	0	8.93264	1.46829
19948	u	novel	-1.24878	-0.090112	chr14	-	108315943	108316288	MSTRG.11033.1	1	346	MSTRG.11033	.	9.60116	1.43278	2.16763	0.240947	0	0	0	0	2.16763	0.269093	1.74567	0.286941
19950	u	novel	-1.15582	-0.0004096	chr14	-	108375463	108375735	MSTRG.11035.1	1	273	MSTRG.11035	.	12.1685	1.8159	0	0	0	0	0	0	15.2527	1.8935	0	0
19951	u	novel	-1.22453	-0.0004096	chr14	-	108378980	108379626	MSTRG.11036.1	1	647	MSTRG.11036	.	0	0	0	0	0	0	6.93045	1.39997	7.41886	0.920988	9.51314	1.56371
19952	u	novel	-1.12468	-0.131072	chr14	-	108381034	108382182	MSTRG.11037.1	1	1149	MSTRG.11037	.	6.56484	0.979668	10.4334	1.15975	5.35248	0.70361	4.88338	0.986457	0	0	11.2942	1.85646
19954	u	novel	-1.31216	-0.0753664	chr14	-	108384568	108385412	MSTRG.11039.1	1	845	MSTRG.11039	.	0	0	7.09704	0.788884	6.20828	0.816109	4.97041	1.00404	12.4213	1.542	7.10177	1.16734
19955	u	novel	-1.29541	-0.0004096	chr14	+	108420824	108421132	MSTRG.11040.1	1	309	MSTRG.11040	.	7.80582	1.16486	9.21359	1.02415	4.85437	0.638131	10.1942	2.05925	4.35922	0.54116	3.90938	0.642599
19967	x	novel	-1.15859	-0.167936	chr14	-	108789393	108793381	MSTRG.11045.1	1	3989	MSTRG.11045	PAPSS2	15.0995	2.2533	15.8145	1.75789	12.3841	1.62794	8.39308	1.69543	9.73903	1.20902	11.9564	1.96531
19972	u	novel	-1.06465	-0.0692224	chr14	+	108909729	108911216	MSTRG.11049.1	1	1488	MSTRG.11049	.	0	0	0	0	0	0	0	0	8.9543	1.1116	13.5101	2.2207
19974	u	novel	-1.18134	-0.0004096	chr14	+	109006193	109008523	MSTRG.11051.1	1	2331	MSTRG.11051	.	14.7958	2.20797	0	0	0	0	5.57658	1.12648	0	0	0	0
19975	u	novel	-1.21809	-0.045056	chr14	+	109016160	109016374	MSTRG.11052.1	1	215	MSTRG.11052	.	0	0	8.14884	0.905798	14.4093	1.89417	1.82326	0.368303	0.697674	0.08661	0	0
19978	u	novel	-1.06221	-0.0004096	chr14	-	109491272	109491533	MSTRG.11053.1	1	262	MSTRG.11053	.	10.3397	1.54299	0	0	0	0	0	0	0	0	0	0
19979	u	novel	-1.24353	-0.0004096	chr14	-	109495288	109495560	MSTRG.11054.1	1	273	MSTRG.11054	.	0	0	0	0	10.1538	1.33477	0.549451	0.110991	0	0	1.10623	0.181834
19981	u	novel	-1.32841	-0.0004096	chr14	-	109522631	109523090	MSTRG.11056.1	1	460	MSTRG.11056	.	10.5043	1.56756	0	0	0	0	0	0	0.978261	0.121443	0	0
19983	u	novel	-1.29451	-0.110592	chr14	+	109538215	109538635	MSTRG.11058.1	1	421	MSTRG.11058	.	10.5297	1.57134	0	0	0	0	2.49406	0.503808	0	0	1.20665	0.198341
19984	u	novel	-1.14896	-0.180224	chr14	-	109567931	109568707	MSTRG.11059.1	1	777	MSTRG.11059	.	9.13385	1.36304	0	0	1.92535	0.253097	2.50965	0.506958	0	0	0	0
19993	i	novel	-1.03223	-0.049152	chr14	+	109786214	109786484	MSTRG.11064.1	1	271	MSTRG.11064	STAMBPL1	10.5277	1.57104	0	0	2.16974	0.285223	0	0	0	0	0	0
2024	i	novel	-1.30393	-0.0004096	chr1	+	123142454	123142817	MSTRG.1107.1	1	364	MSTRG.1107	RORA	0	0	2.37363	0.263845	0	0	6.58791	1.33078	0	0	9.53297	1.56697
20006	u	novel	-1.451	-0.0004096	chr14	-	110212215	110212434	MSTRG.11070.1	1	220	MSTRG.11070	.	12.3545	1.84366	0	0	0	0	0	0	1.36364	0.169284	0	0
20008	i	novel	-1.49351	-0.0004096	chr14	-	110224260	110224632	MSTRG.11072.1	1	373	MSTRG.11072	IFIT1	3.23056	0.482096	0	0	0	0	7.23861	1.46222	1.18767	0.147439	0	0
20009	i	novel	-1.38885	-0.0888832	chr14	-	110230054	110230426	MSTRG.11073.1	1	373	MSTRG.11073	IFIT1	0	0	0	0	0	0	0	0	0	0	9.62467	1.58204
20015	u	novel	-1.02997	-0.0380928	chr14	-	110372168	110372399	MSTRG.11076.1	1	232	MSTRG.11076	.	12.2371	1.82613	4.52586	0.50308	0	0	0	0	2.58621	0.321056	1.30172	0.213969
20024	u	novel	-1.3627	-0.196198	chr14	-	110943766	110943980	MSTRG.11077.1	1	215	MSTRG.11077	.	0	0	0	0	0	0	0	0	60.307	7.4866	62.6372	10.2959
20025	u	novel	-1.12472	-0.0004096	chr14	-	111449278	111449513	MSTRG.11078.1	1	236	MSTRG.11078	.	0	0	0	0	0	0	0	0	3.16525	0.392939	10.2373	1.68274
2025	i	novel	-1.11298	-0.0004096	chr1	+	123163906	123164222	MSTRG.1108.1	1	317	MSTRG.1108	RORA	10.0032	1.49277	0	0	0.946372	0.124405	0	0	0	0	0	0
20019	u	novel	-1.04029	-0.0118784	chr14	-	110481505	110498891	MSTRG.11081.1	3	8323	MSTRG.11081	.	12.7276	1.89934	17.525	1.94802	13.8038	1.81458	1.96731	0.397403	1.70291	0.211402	0.94365	0.155111
20050	i	novel	-1.01772	-0.0004096	chr14	-	113339036	113339353	MSTRG.11093.1	1	318	MSTRG.11093	CPEB3	9.49686	1.41721	0	0	0	0	0	0	0	0	0	0
20051	i	novel	-1.25652	-0.0024576	chr14	-	113347572	113348027	MSTRG.11094.1	1	456	MSTRG.11094	CPEB3	9.60307	1.43306	0	0	0	0	0.986842	0.199345	0	0	0	0
20059	u	novel	-1.27605	-0.012288	chr14	-	113790870	113792405	MSTRG.11098.1	1	1536	MSTRG.11098	.	7.73828	1.15478	0	0	10.3997	1.3671	0	0	0	0	0	0
218	u	novel	-1.20548	-0.053248	chr1	+	12257366	12257910	MSTRG.111.1	1	545	MSTRG.111	.	10.5284	1.57116	0	0	0	0	0	0	0	0	0	0
20062	u	novel	-1.06309	-0.0065536	chr14	+	113963212	113963475	MSTRG.11101.1	1	264	MSTRG.11101	.	13.6705	2.04004	0	0	0	0	0.568182	0.114774	0	0	0	0
20069	u	novel	-1.14016	-0.2048	chr14	-	114350881	114351173	MSTRG.11105.1	1	293	MSTRG.11105	.	0	0	0	0	0	0	8.19113	1.65463	0	0	0	0
20092	i	novel	-1.06241	-0.0405504	chr14	-	114849025	114849455	MSTRG.11115.1	1	431	MSTRG.11115	PDE6C	12.6125	1.88216	0	0	0	0	0	0	0	0	0	0
20093	i	novel	-1.40757	-0.0004096	chr14	-	114849855	114850366	MSTRG.11116.1	1	512	MSTRG.11116	PDE6C	7.66797	1.14429	0	0	0	0	0.585938	0.118361	0	0	11.3242	1.8614
20094	x	novel	-1.18475	-0.0004096	chr14	-	114853426	114853980	MSTRG.11117.1	1	555	MSTRG.11117	PDE6C	10.8865	1.62459	0	0	0	0	0	0	3.0457	0.378097	0	0
20101	i	novel	-1.4038	-0.0294912	chr14	+	115513482	115513691	MSTRG.11121.1	1	210	MSTRG.11121	PLCE1	0	0	0	0	0	0	0	0	0	0	14.3333	2.35602
20128	o	novel	-1.16195	-0.090112	chr14	-	116329666	116369204	MSTRG.11130.5	3	847	MSTRG.11130	ENSSSCG00000010491	0.376268	0.05615	1.38075	0.153479	4.43579	0.583107	2.04768	0.413637	17.2804	2.14522	1.57771	0.259333
20133	u	novel	-1.30588	-0.0004096	chr14	+	116450567	116450916	MSTRG.11132.1	1	350	MSTRG.11132	.	12.08	1.80269	0	0	0	0	1.28571	0.259718	2.09714	0.260342	0	0
20139	u	novel	-1.21802	-0.016384	chr14	-	116687497	116687940	MSTRG.11135.1	1	444	MSTRG.11135	.	0	0	0	0	0	0	0	0	6.09234	0.756312	9.88964	1.62559
20140	u	novel	-1.13495	-0.0110592	chr14	-	116692671	116692874	MSTRG.11136.1	1	204	MSTRG.11136	.	8.88235	1.32551	0	0	0	0	0	0	0	0	0	0
20142	u	novel	-1.10155	-0.0004096	chr14	-	116712186	116712420	MSTRG.11138.1	1	235	MSTRG.11138	.	12.8511	1.91776	0	0	0	0	0	0	0	0	0	0
20144	u	novel	-1.34744	-0.1024	chr14	-	116733763	116734260	MSTRG.11140.1	1	498	MSTRG.11140	.	0	0	3.31325	0.36829	5.42169	0.712707	1.07229	0.216606	0	0	9.70281	1.59488
20145	u	novel	-1.01002	-0.0229376	chr14	-	116738069	116738393	MSTRG.11141.1	1	325	MSTRG.11141	.	4.48	0.668549	0	0	0	0	6.89539	1.39289	0	0	0	0
20147	u	novel	-1.42822	-0.0241664	chr14	+	116771564	116771777	MSTRG.11143.1	1	214	MSTRG.11143	.	0	0	12.3738	1.37543	12.5888	1.65486	0	0	7.69626	0.955426	5.56075	0.914039
20165	i	novel	-1.31725	-0.138035	chr14	-	116979728	116980007	MSTRG.11149.1	1	280	MSTRG.11149	ENTPD1	9.46429	1.41235	15.7304	1.74853	11.775	1.54788	6.29286	1.27118	2.14286	0.266017	10.2464	1.68424
20184	i	novel	-1.53261	-0.016384	chr14	-	117439934	117440210	MSTRG.11153.1	1	277	MSTRG.11153	OPALIN	4.36101	0.650792	7.03971	0.782511	11.3718	1.49488	11.9134	2.40653	22.7437	2.82343	7.08664	1.16486
20186	i	novel	-1.07758	-0.043008	chr14	+	117458536	117458767	MSTRG.11155.1	1	232	MSTRG.11155	TLL2	27.1034	4.04464	42.4612	4.71985	23.9224	3.14472	16.6379	3.36091	24.5388	3.04628	31.8922	5.24224
20209	u	novel	-1.29608	-0.073728	chr14	+	117997455	117997911	MSTRG.11160.1	1	457	MSTRG.11160	.	1.32166	0.197231	0	0	11.4705	1.50785	0	0	0	0	4.94529	0.812875
20202	u	novel	-1.19879	-0.069632	chr14	+	117938847	117941438	MSTRG.11161.1	2	1439	MSTRG.11161	.	19.057	2.84387	19.4114	2.15771	18.91	2.48581	8.19597	1.65561	17.4104	2.16135	1.06462	0.174996
20205	u	novel	-1.27376	-0.016384	chr14	+	117979048	117982631	MSTRG.11164.1	1	3584	MSTRG.11164	.	8.11479	1.21097	5.77986	0.64247	8.51925	1.1199	0	0	0	0	0	0
20207	u	novel	-1.09766	-0.0004096	chr14	+	117993426	117993796	MSTRG.11166.1	1	371	MSTRG.11166	.	12.6173	1.88287	0	0	0	0	0	0	0	0	5.69811	0.936618
20208	u	novel	-1.07519	-0.372736	chr14	+	117994766	117995310	MSTRG.11167.1	1	545	MSTRG.11167	.	4.43303	0.661539	0	0	0	0	7.43119	1.50112	0	0	0	0
20218	u	novel	-1.32999	-0.0004096	chr14	+	118048953	118052143	MSTRG.11169.1	1	3191	MSTRG.11169	.	123.373	18.4109	76.4749	8.5007	76.5071	10.0572	52.146	10.5337	85.6882	10.6375	0	0
20227	u	novel	-1.26352	-0.101581	chr14	+	118325779	118326192	MSTRG.11173.1	1	414	MSTRG.11173	.	0	0	7.83092	0.870459	3.26087	0.428657	7.57488	1.53015	10.4589	1.29839	10.7778	1.77158
20245	i	novel	-1.25085	-0.0929792	chr14	+	118403194	118403449	MSTRG.11180.1	1	256	MSTRG.11180	UBTD1	0.589844	0.088022	0	0	0	0	0	0	0	0	15.5039	2.54843
20246	i	novel	-1.45539	-0.045056	chr14	+	118414327	118414578	MSTRG.11181.1	1	252	MSTRG.11181	UBTD1	4.19444	0.625935	0	0	1.78571	0.234741	7.14286	1.44288	0	0	0	0
20247	i	novel	-1.35513	-0.258048	chr14	+	118425798	118426143	MSTRG.11182.1	1	346	MSTRG.11182	UBTD1	13.5289	2.01891	0	0	0.867052	0.113978	1.7341	0.350294	0	0	0	0
20288	u	novel	-1.30414	-0.0004096	chr14	+	120177668	120177892	MSTRG.11196.1	1	225	MSTRG.11196	.	13.4222	2.00299	0	0	0	0	0	0	0	0	0	0
20292	u	novel	-1.0214	-0.0299008	chr14	+	120252241	120257665	MSTRG.11198.1	1	5425	MSTRG.11198	.	0	0	11.2037	1.24537	8.74028	1.14895	8.87299	1.79237	12.5425	1.55704	0	0
20293	u	novel	-1.25418	-0.0352256	chr14	+	120259513	120261815	MSTRG.11199.1	1	2303	MSTRG.11199	.	0	0	0	0	4.29527	0.564634	6.42944	1.29877	0	0	9.63396	1.58357
20294	u	novel	-1.21792	-0.0004096	chr14	+	120268067	120268316	MSTRG.11200.1	1	250	MSTRG.11200	.	9.664	1.44216	0	0	0	0	0	0	1.2	0.14897	0	0
20312	i	novel	-1.13388	-0.0004096	chr14	-	120589936	120590214	MSTRG.11208.1	1	279	MSTRG.11208	DNMBP	2.10753	0.314505	0	0	1.6129	0.212024	1.07527	0.217208	2.68817	0.333714	13.5305	2.22405
20315	i	novel	-1.13249	-0.0602112	chr14	+	120702669	120702955	MSTRG.11210.1	1	287	MSTRG.11210	ENSSSCG00000010546	12.6272	1.88435	23.2317	2.58236	14.446	1.899	13.3972	2.70628	30.3972	3.77356	21.2857	3.49881
20330	i	novel	-1.30768	-0.107315	chr14	+	120915691	120915915	MSTRG.11213.1	1	225	MSTRG.11213	PKD2L1	41.8444	6.24443	86.6311	9.62963	81.24	10.6794	35.9733	7.26672	89.88	11.1578	85.4044	14.0382
20337	u	novel	-1.39911	-0.197018	chr14	-	121023623	121023860	MSTRG.11218.1	1	238	MSTRG.11218	.	5.71008	0.852114	2.05042	0.227918	1.2605	0.165699	3.15126	0.636564	6.26891	0.778232	11.3697	1.86888
20332	u	novel	-1.37867	-0.0335872	chr14	+	120963892	120964169	MSTRG.11219.1	1	278	MSTRG.11219	.	10.2338	1.52719	0	0	5.87323	0.772064	0	0	5.25228	0.652025	1.14606	0.188382
20342	u	novel	-1.01435	-0.02048	chr14	-	121404230	121407317	MSTRG.11222.1	1	3088	MSTRG.11222	.	9.40577	1.40362	0	0	0	0	2.47539	0.500036	0	0	0	0
20358	u	novel	-1.13961	-0.215859	chr14	+	121692261	121692639	MSTRG.11225.1	1	379	MSTRG.11225	.	2.58971	0.386461	6.32454	0.703015	4.49868	0.591374	10.4881	2.11863	15.8193	1.96383	10.3588	1.70272
20353	u	novel	-1.42087	-0.192512	chr14	-	121660544	121660773	MSTRG.11226.1	1	230	MSTRG.11226	.	9.1913	1.37162	0	0	0	0	0	0	0	0	0	0
20368	u	novel	-1.26557	-0.0004096	chr14	-	121773560	121773843	MSTRG.11230.1	1	284	MSTRG.11230	.	0	0	0	0	0	0	4.75352	0.960226	10.5634	1.31135	14.2923	2.34927
20369	u	novel	-1.19243	-0.158925	chr14	-	121794995	121795337	MSTRG.11237.1	1	343	MSTRG.11237	.	10.1254	1.511	0	0	0	0	0	0	0	0	0	0
20372	u	novel	-1.17633	-0.0004096	chr14	-	121824003	121824444	MSTRG.11239.1	1	442	MSTRG.11239	.	0	0	9.42081	1.04719	11.5385	1.51679	0	0	0	0	7.08824	1.16512
20374	u	novel	-1.08413	-0.0303104	chr14	+	121829655	121830132	MSTRG.11241.1	1	478	MSTRG.11241	.	10.4247	1.55567	0	0	7.84519	1.03129	6.59414	1.33204	4.06485	0.504617	6.4341	1.0576
20380	u	novel	-1.38532	-0.024576	chr14	+	122044640	122045018	MSTRG.11244.1	1	379	MSTRG.11244	.	9.562	1.42693	0	0	0	0	0	0	0	0	0	0
20381	u	novel	-1.22341	-0.0090112	chr14	+	122058324	122058669	MSTRG.11245.1	1	346	MSTRG.11245	.	8.29191	1.2374	0	0	0	0	0	0	0	0	8.29191	1.36297
20382	u	novel	-1.05505	-0.134349	chr14	+	122069854	122070405	MSTRG.11246.1	1	552	MSTRG.11246	.	12.029	1.79508	13.0435	1.44987	7.04348	0.9259	1.62319	0.327889	5.69928	0.707517	4.09783	0.673574
20383	u	novel	-1.42326	-0.192512	chr14	+	122075148	122075394	MSTRG.11247.1	1	247	MSTRG.11247	.	0	0	0	0	1.79757	0.236299	6.68016	1.34941	0	0	0	0
20384	u	novel	-1.16926	-0.0270336	chr14	+	122084482	122084714	MSTRG.11248.1	1	233	MSTRG.11248	.	9.03004	1.34755	0	0	0	0	0	0	0	0	0	0
20385	u	novel	-1.0995	-0.049152	chr14	+	122093779	122094326	MSTRG.11249.1	1	548	MSTRG.11249	.	0	0	0	0	0	0	0	0	0	0	8.5	1.39717
2074	i	novel	-1.1116	-0.0221184	chr1	+	125139707	125140753	MSTRG.1125.1	1	1047	MSTRG.1125	ENSSSCG00000004592	0	0	24.6772	2.74303	0	0	9.2149	1.86144	0	0	0	0
20386	u	novel	-1.07788	-0.0421888	chr14	+	122118493	122118955	MSTRG.11250.1	1	463	MSTRG.11250	.	4.23974	0.632695	13.2829	1.47649	7.12743	0.936936	0	0	0	0	0	0
20398	u	novel	-1.18396	-0.0344064	chr14	+	122524632	122524948	MSTRG.11252.1	1	317	MSTRG.11252	.	10.9464	1.63352	19.6688	2.18632	14.1735	1.86318	5.20505	1.05143	8.30915	1.03151	10.9558	1.80085
20396	u	novel	-1.30641	-0.121242	chr14	+	122482841	122483399	MSTRG.11257.1	1	559	MSTRG.11257	.	0	0	0	0	13.9159	1.82932	0	0	0	0	0	0
20397	u	novel	-1.19618	-0.0397312	chr14	+	122484406	122486313	MSTRG.11258.1	1	1908	MSTRG.11258	.	5.63941	0.841567	12.8438	1.42768	0	0	3.5304	0.713151	4.12998	0.512702	3.22746	0.530509
2075	i	novel	-1.23646	-0.012288	chr1	+	125145025	125145536	MSTRG.1126.1	1	512	MSTRG.1126	ENSSSCG00000004592	11.2567	1.67983	21.0294	2.33756	15.1816	1.9957	0	0	0	0	0	0
20408	i	novel	-1.27816	-0.0004096	chr14	-	122759573	122760062	MSTRG.11262.1	1	490	MSTRG.11262	C10orf76	0	0	0	0	0.918367	0.120724	0	0	0	0	11.3367	1.86346
20418	u	novel	-1.27032	-0.0507904	chr14	-	122984700	122984937	MSTRG.11264.1	1	238	MSTRG.11264	.	20.2857	3.02723	15.6429	1.73881	13.7899	1.81275	7.52521	1.52012	13.7815	1.71086	24	3.94496
20431	u	novel	-1.13565	-0.0004096	chr14	+	123061345	123061600	MSTRG.11265.1	1	256	MSTRG.11265	.	17.6367	2.63192	21.668	2.40854	14.0625	1.84858	7.61719	1.53869	12.8789	1.59881	19.7969	3.25408
20439	u	novel	-1.41152	-0.057344	chr14	-	123257442	123257835	MSTRG.11267.1	1	394	MSTRG.11267	.	0	0	0	0	0	0	0	0	0	0	15.7132	2.58283
20449	x	novel	-1.1137	-0.138854	chr14	+	123271254	123271576	MSTRG.11271.1	1	323	MSTRG.11271	PSD	0	0	10.6842	1.18762	0	0	10.6811	2.15762	0	0	1.40248	0.23053
20474	u	novel	-1.07758	-0.0012288	chr14	-	123535430	123536132	MSTRG.11276.1	1	703	MSTRG.11276	.	0	0	0	0	0	0	7.46799	1.50856	0	0	0	0
2060	i	novel	-1.38239	-0.1024	chr1	-	125026848	125027329	MSTRG.1128.1	1	482	MSTRG.1128	RNF111	0	0	0	0	0	0	7.71784	1.55903	0	0	0	0
20478	i	novel	-1.0681	-0.0004096	chr14	+	123610952	123614372	MSTRG.11280.1	1	3421	MSTRG.11280	ENSSSCG00000024308	6.70798	1.00103	11.5168	1.28017	8.15814	1.07243	5.62993	1.13726	9.77989	1.21409	9.05525	1.48844
20454	i	novel	-1.06622	-0.237568	chr14	+	123322546	123322747	MSTRG.11283.1	1	202	MSTRG.11283	MFSD13A	0	0	0	0	0	0	8.71287	1.76003	6.51485	0.808764	0	0
20456	u	novel	-1.53613	-0.086016	chr14	-	123355194	123355429	MSTRG.11285.1	1	236	MSTRG.11285	.	30.4364	4.54202	41.8898	4.65634	36.6356	4.81593	30.589	6.17907	61.8941	7.68362	35.6822	5.86521
20458	i	novel	-1.07481	-0.0004096	chr14	+	123359982	123360398	MSTRG.11287.1	1	417	MSTRG.11287	SUFU	0	0	0	0	6.42446	0.844527	0	0	0	0	11.2182	1.84398
20460	i	novel	-1.22304	-0.0004096	chr14	+	123376498	123376858	MSTRG.11289.1	1	361	MSTRG.11289	SUFU	9.86981	1.47287	0	0	0	0	0	0	0	0	0	0
2061	i	novel	-1.09089	-0.0004096	chr1	-	125028579	125030649	MSTRG.1129.1	1	2071	MSTRG.1129	RNF111	9.74457	1.45418	0	0	3.40415	0.447493	3.17431	0.641221	4.59268	0.570143	0	0
20461	i	novel	-1.16743	-0.008192	chr14	+	123401376	123402930	MSTRG.11290.1	1	1555	MSTRG.11290	SUFU	0	0	0	0	10.7833	1.41752	0	0	3.4	0.422081	5.71383	0.939201
20463	i	novel	-1.16392	-0.0299008	chr14	+	123405485	123407358	MSTRG.11292.1	1	1874	MSTRG.11292	SUFU	6.18356	0.922771	0	0	0	0	0	0	0	0	10.1249	1.66426
20466	i	novel	-1.13434	-0.299008	chr14	+	123427594	123428097	MSTRG.11295.1	1	504	MSTRG.11295	SUFU	8.46429	1.26312	0	0	0	0	0	0	0	0	0	0
20470	u	novel	-1.16512	-0.0004096	chr14	+	123482097	123491019	MSTRG.11296.1	2	379	MSTRG.11296	.	12.2452	1.82734	12.094	1.34433	12.0422	1.58301	3.20317	0.647049	8.49077	1.05406	5.9314	0.974964
221	u	novel	-1.34241	-0.0004096	chr1	+	12314173	12314746	MSTRG.113.1	1	574	MSTRG.113	.	0	0	6.58614	0.732094	8.55575	1.1247	0	0	0	0	0	0
2062	i	novel	-1.19854	-0.0004096	chr1	-	125031800	125032501	MSTRG.1130.1	1	702	MSTRG.1130	RNF111	8.17165	1.21945	12.9915	1.44409	7.05128	0.926925	0	0	0	0	4.27208	0.702216
20511	u	novel	-1.21558	-0.036864	chr14	-	124163152	124164231	MSTRG.11303.1	1	1080	MSTRG.11303	.	10.5667	1.57686	8.51111	0.946067	6.85926	0.901683	7.60278	1.53578	0	0	7.11667	1.16979
20516	u	novel	-1.2498	-0.0815104	chr14	+	124221802	124225932	MSTRG.11306.1	1	4131	MSTRG.11306	.	14.0511	2.09684	17.0864	1.89927	13.6253	1.79111	9.88138	1.99607	15.6633	1.94446	15.0228	2.46934
20517	u	novel	-1.14333	-0.0004096	chr14	+	124226251	124227207	MSTRG.11307.1	1	957	MSTRG.11307	.	9.13062	1.36256	0	0	9.02612	1.18653	7.11808	1.43787	12.0805	1.49969	10.931	1.79677
20518	u	novel	-1.0345	-0.0589824	chr14	+	124227532	124240374	MSTRG.11308.1	1	12843	MSTRG.11308	.	8.87721	1.32474	10.6142	1.17984	0	0	0	0	0	0	11.9766	1.96863
2063	i	novel	-1.12956	-0.036864	chr1	-	125094297	125094976	MSTRG.1131.1	1	680	MSTRG.1131	RNF111	5.03824	0.751854	0	0	0	0	0	0	0	0	9.03677	1.4854
20503	u	novel	-1.30436	-0.0008192	chr14	+	124134865	124139489	MSTRG.11312.1	3	2424	MSTRG.11312	.	0	0	0	0	0.112753	0.014822	11.3156	2.28579	0	0	0.100502	0.01652
20504	u	novel	-1.27292	-0.004096	chr14	+	124135360	124138395	MSTRG.11312.2	3	1479	MSTRG.11312	.	8.93327	1.33311	5.98857	0.66567	6.19429	0.814269	0.711855	0.143797	17.5797	2.18237	16.347	2.68701
20505	u	novel	-1.12558	-0.106496	chr14	-	124139755	124140732	MSTRG.11313.1	1	978	MSTRG.11313	.	9.5726	1.42851	0	0	3.57486	0.469933	0	0	0	0	0	0
20508	u	novel	-1.07713	-0.0004096	chr14	-	124143563	124146859	MSTRG.11316.1	1	3297	MSTRG.11316	.	7.83045	1.16854	8.65727	0.962313	6.01456	0.790643	5.11222	1.03269	6.8805	0.854155	7.52988	1.23771
20510	u	novel	-1.08754	-0.004096	chr14	-	124161755	124162057	MSTRG.11318.1	1	303	MSTRG.11318	.	0	0	0	0	0	0	0	0	0	0	8.42244	1.38443
2064	i	novel	-1.04484	-0.0077824	chr1	-	125096326	125098074	MSTRG.1132.1	1	1749	MSTRG.1132	RNF111	3.53974	0.528234	0	0	5.20263	0.683911	5.02802	1.01568	9.12293	1.13253	7.53859	1.23914
20525	u	novel	-1.02102	-0.0004096	chr14	+	124805895	124806166	MSTRG.11320.1	1	272	MSTRG.11320	.	17.3824	2.59396	9.32353	1.03637	0	0	7.43382	1.50165	4.96324	0.616143	14.4338	2.37254
20542	u	novel	-1.23444	-0.0159744	chr14	-	125216693	125217249	MSTRG.11326.1	1	557	MSTRG.11326	.	10.5727	1.57776	0	0	0	0	0	0	0.5386	0.066863	1.08438	0.178243
20561	u	novel	-1.14706	-0.0004096	chr14	-	129119059	129119474	MSTRG.11328.1	1	416	MSTRG.11328	.	11.4423	1.70753	0	0	0	0	2.88462	0.582701	0	0	0	0
20562	u	novel	-1.12795	-0.04096	chr14	-	129119645	129123389	MSTRG.11329.1	2	527	MSTRG.11329	.	6.66793	0.995053	3.99322	0.443873	4.10108	0.539108	8.36243	1.68924	1.10659	0.137373	4.98482	0.819372
2065	i	novel	-1.00076	-0.0004096	chr1	-	125099098	125099505	MSTRG.1133.1	1	408	MSTRG.1133	RNF111	13.1887	1.96815	0	0	0	0	1.47059	0.297063	0	0	0	0
20569	u	novel	-1.34187	-0.004096	chr14	-	131218195	131218465	MSTRG.11330.1	1	271	MSTRG.11330	.	20.5424	3.06554	25.2103	2.8023	22.0221	2.89492	19.8229	4.00428	43.8303	5.44115	40.0148	6.57736
20570	u	novel	-1.03591	-0.0811008	chr14	+	131232211	131232456	MSTRG.11331.1	1	246	MSTRG.11331	.	28.2358	4.21361	8.50813	0.945736	10.9594	1.44066	10.7073	2.16291	24.9106	3.09244	12.7195	2.09075
20566	i	novel	-1.36817	-0.0004096	chr14	-	131189845	131190261	MSTRG.11334.1	1	417	MSTRG.11334	XPNPEP1	9.05276	1.35094	0	0	0	0	0	0	2.15827	0.267931	0	0
20567	i	novel	-1.3806	-0.053248	chr14	-	131201239	131201896	MSTRG.11335.1	1	658	MSTRG.11335	XPNPEP1	0	0	0	0	0	0	0	0	0	0	8.95137	1.47137
20568	i	novel	-1.14524	-0.0704512	chr14	-	131202190	131202458	MSTRG.11336.1	1	269	MSTRG.11336	XPNPEP1	0	0	0	0	0	0	7.68773	1.55295	0	0	3.92937	0.645884
2066	i	novel	-1.12338	-0.167936	chr1	-	125100114	125101504	MSTRG.1134.1	1	1391	MSTRG.1134	RNF111	0	0	2.43638	0.27082	0	0	0	0	7.44069	0.923698	7.00503	1.15144
20576	u	novel	-1.01129	-0.0262144	chr14	-	131600749	131601087	MSTRG.11340.1	1	339	MSTRG.11340	.	15.1445	2.26001	0.442478	0.049184	0.884956	0.116332	0	0	0	0	1.78171	0.292866
20578	x	novel	-1.06516	-0.0004096	chr14	-	131604918	131605213	MSTRG.11342.1	1	296	MSTRG.11342	ENSSSCG00000022128	0	0	0	0	8.76351	1.15201	7.09459	1.43313	0	0	0	0
20579	i	novel	-1.09946	-0.172032	chr14	-	131606486	131606944	MSTRG.11343.1	1	459	MSTRG.11343	ENSSSCG00000022128	14.7778	2.20528	8.77996	0.975951	0	0	0	0	0	0	0	0
20584	u	novel	-1.13026	-0.045056	chr14	-	131776576	131776826	MSTRG.11345.1	1	251	MSTRG.11345	.	0	0	0	0	0	0	1.19522	0.241438	0	0	9.0239	1.48329
20585	u	novel	-1.21431	-0.0004096	chr14	-	131785609	131790861	MSTRG.11346.1	2	203	MSTRG.11346	.	11.9458	1.78267	7.08772	0.787848	3.99803	0.525561	2.27907	0.460378	4.40969	0.547426	7.51494	1.23526
2067	i	novel	-1.06834	-0.036864	chr1	-	125103021	125103360	MSTRG.1135.1	1	340	MSTRG.1135	RNF111	0	0	0	0	0	0	4.83235	0.97615	0	0	12.8794	2.11703
20594	i	novel	-1.42319	-0.049152	chr14	+	132103568	132103807	MSTRG.11351.1	1	240	MSTRG.11351	RBM20	12.5458	1.87221	0	0	16.8292	2.21228	0	0	5.6	0.695192	8.78333	1.44375
20603	i	novel	-1.16841	-0.036864	chr14	-	132271531	132273863	MSTRG.11354.1	1	2333	MSTRG.11354	ENSSSCG00000029207	9.12045	1.36104	0.566088	0.062924	0	0	0	0	1.5993	0.19854	2.51993	0.41421
20604	x	novel	-1.08789	-0.0274432	chr14	+	132274739	132275672	MSTRG.11355.1	1	934	MSTRG.11355	ENSSSCG00000029207	0	0	11.5096	1.27937	0	0	4.17238	0.842833	4.92291	0.611138	4.68844	0.770654
20609	u	novel	-1.25928	-0.0004096	chr14	-	132916758	132916972	MSTRG.11356.1	1	215	MSTRG.11356	.	10.5349	1.57212	0	0	0	0	0	0	0	0	0	0
20610	u	novel	-1.14672	-0.090112	chr14	-	132921042	132922948	MSTRG.11357.1	2	927	MSTRG.11357	.	0	0	7.03883	0.782414	2.75081	0.361607	8.22654	1.66179	4.13986	0.513928	5.19094	0.853252
2068	i	novel	-1.50031	-0.0004096	chr1	-	125104834	125105256	MSTRG.1136.1	1	423	MSTRG.1136	RNF111	3.10638	0.463564	0	0	0	0	5.9078	1.19339	0	0	9.93853	1.63363
20612	u	novel	-1.25381	-0.0004096	chr14	-	133047660	133047959	MSTRG.11360.1	1	300	MSTRG.11360	.	9.06	1.35202	0	0	0	0	0	0	0	0	0	0
20613	u	novel	-1.29328	-0.0004096	chr14	-	133052321	133052551	MSTRG.11361.1	1	231	MSTRG.11361	.	12.4199	1.85342	0	0	0	0	3.24675	0.655854	0	0	0	0
20614	u	novel	-1.13042	-0.0004096	chr14	-	133057504	133057720	MSTRG.11362.1	1	217	MSTRG.11362	.	16.7005	2.4922	0	0	0	0	0	0	0	0	0	0
20615	u	novel	-1.19303	-0.0004096	chr14	-	133062024	133062320	MSTRG.11363.1	1	297	MSTRG.11363	.	14.7037	2.19423	0	0	0	0	0	0	0	0	0	0
20616	u	novel	-1.18229	-0.16384	chr14	-	133163203	133163830	MSTRG.11364.1	1	628	MSTRG.11364	.	10.5796	1.57879	0	0	0	0	2.84554	0.574808	0	0	0	0
20619	u	novel	-1.10795	-0.0397312	chr14	-	133213254	133213493	MSTRG.11367.1	1	240	MSTRG.11367	.	9.4375	1.40836	0	0	0	0	0	0	0	0	0	0
20620	u	novel	-1.16174	-0.028672	chr14	-	133273385	133273793	MSTRG.11368.1	1	409	MSTRG.11368	.	0	0	5.13447	0.570731	0	0	0	0	13.5501	1.68213	0	0
20621	u	novel	-1.04044	-0.0004096	chr14	-	133279636	133279899	MSTRG.11369.1	1	264	MSTRG.11369	.	17.4583	2.6053	0	0	0.765152	0.100583	0	0	0	0	0	0
20622	u	novel	-1.28743	-0.0004096	chr14	-	133298096	133298372	MSTRG.11370.1	1	277	MSTRG.11370	.	9.81227	1.46428	0	0	0	0	0	0	0	0	0	0
20623	u	novel	-1.19055	-0.049152	chr14	-	133308416	133309694	MSTRG.11371.1	1	1279	MSTRG.11371	.	0	0	4.89758	0.544399	0	0	6.79437	1.37248	7.97029	0.989444	3.97107	0.652739
20625	u	novel	-1.3341	-0.0335872	chr14	-	133319209	133319676	MSTRG.11373.1	1	468	MSTRG.11373	.	0	0	14.3462	1.59467	0	0	6.39316	1.29144	17.3077	2.1486	7.71795	1.26863
20628	u	novel	-1.1964	-0.0004096	chr14	-	133342423	133342674	MSTRG.11376.1	1	252	MSTRG.11376	.	9.5873	1.43071	0	0	0	0	0	0	0	0	0	0
20629	u	novel	-1.41356	-0.0507904	chr14	-	133367009	133367235	MSTRG.11377.1	1	227	MSTRG.11377	.	9.20705	1.37396	0	0	3.26432	0.42911	0	0	0	0	0	0
20630	u	novel	-1.04137	-0.0782336	chr14	-	133369592	133369843	MSTRG.11378.1	1	252	MSTRG.11378	.	0	0	0	0	0	0	0	0	11.3095	1.40398	0	0
20632	u	novel	-1.12667	-0.159744	chr14	-	133379987	133380477	MSTRG.11380.1	1	491	MSTRG.11380	.	9.73523	1.45278	0	0	0	0	0	0	7.48404	0.929079	2.46028	0.404405
20634	u	novel	-1.35674	-0.0004096	chr14	-	133389314	133389530	MSTRG.11382.1	1	217	MSTRG.11382	.	2.78341	0.415367	0	0	0	0	0	0	0	0	0	0
20636	u	novel	-1.05151	-0.0897024	chr14	-	133412110	133412865	MSTRG.11384.1	1	756	MSTRG.11384	.	0	0	0	0	10.3175	1.35628	0	0	0	0	0	0
20637	u	novel	-1.12939	-0.077824	chr14	-	133416182	133417174	MSTRG.11385.1	1	993	MSTRG.11385	.	9.72306	1.45097	0	0	0	0	2.26586	0.457711	0	0	0	0
20638	u	novel	-1.05891	-0.04096	chr14	-	133425926	133426334	MSTRG.11386.1	1	409	MSTRG.11386	.	0	0	0	0	0	0	7.25183	1.46489	0	0	0	0
20641	u	novel	-1.13229	-0.128205	chr14	-	133451147	133451761	MSTRG.11389.1	1	615	MSTRG.11389	.	9.57561	1.42897	0	0	11.3724	1.49495	6.58537	1.33026	0	0	0	0
20642	u	novel	-1.3109	-0.0004096	chr14	-	133456712	133457056	MSTRG.11390.1	1	345	MSTRG.11390	.	0	0	0	0	12.5884	1.65481	2.17391	0.439137	0	0	0	0
20643	u	novel	-1.19138	-0.1024	chr14	-	133459373	133460084	MSTRG.11391.1	1	712	MSTRG.11391	.	14.8287	2.21287	0	0	0	0	0	0	0	0	0	0
20644	u	novel	-1.25375	-0.14336	chr14	-	133460561	133461032	MSTRG.11392.1	1	472	MSTRG.11392	.	2.87924	0.429667	0	0	0	0	0	0	12.0763	1.49917	0	0
222	u	novel	-1.48533	-0.0004096	chr1	+	12712959	12713202	MSTRG.114.1	1	244	MSTRG.114	.	11.1393	1.66232	0	0	0	0	0	0	0	0	0	0
20662	u	novel	-1.48818	-0.0004096	chr14	+	134224884	134225148	MSTRG.11401.1	1	265	MSTRG.11401	.	9.11698	1.36052	1.69811	0.188757	0	0	0	0	0	0	0	0
20663	u	novel	-1.00218	-0.123699	chr14	+	134237788	134238291	MSTRG.11402.1	1	504	MSTRG.11402	.	8.98809	1.34129	0	0	2.375	0.312205	3.41667	0.690177	0	0	0	0
20664	u	novel	-1.01592	-0.0004096	chr14	+	134248158	134248648	MSTRG.11403.1	1	491	MSTRG.11403	.	0	0	0	0	0	0	0	0	0	0	8.80041	1.44655
20665	u	novel	-1.31142	-0.0004096	chr14	+	134270205	134270609	MSTRG.11404.1	1	405	MSTRG.11404	.	9.69383	1.44661	0	0	0	0	0	0	0	0	0	0
20668	u	novel	-1.4546	-0.0004096	chr14	+	134334098	134334320	MSTRG.11407.1	1	223	MSTRG.11407	.	3.38565	0.505239	0	0	0	0	2.01794	0.407629	0	0	8.80269	1.44693
20669	u	novel	-1.12381	-0.0004096	chr14	+	134385882	134386100	MSTRG.11408.1	1	219	MSTRG.11408	.	0	0	0	0	0	0	8.21918	1.6603	0	0	0	0
20670	u	novel	-1.01078	-0.229376	chr14	+	134427344	134457901	MSTRG.11409.1	2	1819	MSTRG.11409	.	8.46124	1.26267	0.020891	0.002322	3.92798	0.516352	8.06084	1.62831	11.3176	1.40498	3.97306	0.653066
20686	i	novel	-1.09976	-0.124518	chr14	+	135158175	135158406	MSTRG.11412.1	1	232	MSTRG.11412	HABP2	7.125	1.06326	7.74569	0.860986	8.40517	1.1049	5.17241	1.04484	3.23276	0.40132	8.44397	1.38796
20695	u	novel	-1.25224	-0.0004096	chr14	+	135364989	135365726	MSTRG.11413.1	1	738	MSTRG.11413	.	16.1125	2.40446	20.5488	2.28414	14.2276	1.87029	8.13008	1.6423	19.374	2.40511	0	0
20698	u	novel	-1.35415	-0.0151552	chr14	-	135497845	135498138	MSTRG.11419.1	1	294	MSTRG.11419	.	9.2449	1.37961	0	0	0	0	1.16326	0.234983	0	0	1.02721	0.168846
2087	u	novel	-1.06556	-0.0004096	chr1	+	125395930	125396246	MSTRG.1142.1	1	317	MSTRG.1142	.	13.5757	2.0259	0	0	0	0	0	0	0	0	0	0
20700	u	novel	-1.16334	-0.0581632	chr14	+	135578889	135579119	MSTRG.11420.1	1	231	MSTRG.11420	.	5.22944	0.780387	9.35065	1.03939	16.2164	2.13173	6.49351	1.31171	0	0	0	0
20708	u	novel	-1.00954	-0.057344	chr14	-	135874543	135875419	MSTRG.11423.1	1	877	MSTRG.11423	.	9.64196	1.43887	0	0	0	0	0	0	0	0	7.40365	1.21696
20677	i	novel	-1.23977	-0.0290816	chr14	+	134671890	134673488	MSTRG.11427.1	1	1599	MSTRG.11427	TCF7L2	0	0	12.339	1.37156	5.30675	0.697599	4.7237	0.954202	0	0	0	0
20711	u	novel	-1.08602	-0.117555	chr14	-	136263792	136264058	MSTRG.11431.1	1	267	MSTRG.11431	.	22.6217	3.37583	29.0974	3.23437	22.4607	2.95256	13.4831	2.72364	35.6405	4.42446	15.6067	2.56533
20712	u	novel	-1.15975	-0.0004096	chr14	+	136275020	136275294	MSTRG.11432.1	1	275	MSTRG.11432	.	59.1636	8.82897	81.7091	9.08252	61.7455	8.11674	42.3709	8.55905	70.0255	8.69307	46.2727	7.60601
20718	u	novel	-1.10589	-0.0004096	chr14	-	136341287	136341752	MSTRG.11434.1	1	466	MSTRG.11434	.	9.89914	1.47724	0	0	0	0	0	0	0	0	0.648069	0.106525
20713	u	novel	-1.23684	-0.0004096	chr14	-	136280968	136281302	MSTRG.11435.1	1	335	MSTRG.11435	.	3.60597	0.538118	0	0	0	0	0	0	0	0	8.56418	1.40772
20720	u	novel	-1.45434	-0.0004096	chr14	-	136377013	136377290	MSTRG.11438.1	1	278	MSTRG.11438	.	0	0	0	0	0	0	7.01439	1.41693	0	0	0	0
2090	u	novel	-1.22832	-0.057344	chr1	+	125430699	125431424	MSTRG.1144.1	1	726	MSTRG.1144	.	8.04959	1.20124	0	0	0	0	0	0	0	0	0	0
20724	i	novel	-1.0942	-0.0294912	chr14	+	136415887	136416562	MSTRG.11440.1	1	676	MSTRG.11440	TRUB1	12.2589	1.82939	12.1538	1.35098	6.20858	0.816148	1.77515	0.358585	11.5059	1.42836	8.98225	1.47644
20725	i	novel	-1.08344	-0.131072	chr14	+	136417313	136417579	MSTRG.11441.1	1	267	MSTRG.11441	TRUB1	11.3109	1.68792	35.9026	3.99082	28.9813	3.80973	5.603	1.13182	16.2809	2.02114	17.4419	2.86699
20732	u	novel	-1.09303	-0.008192	chr14	+	136891136	136892709	MSTRG.11443.1	1	1574	MSTRG.11443	.	14.1569	2.11263	0	0	0	0	0	0	5.96696	0.740748	8.71664	1.43278
20733	u	novel	-1.10989	-0.024576	chr14	+	136894889	136896425	MSTRG.11444.1	1	1537	MSTRG.11444	.	8.42746	1.25763	3.12297	0.347139	0	0	2.7326	0.551993	5.66038	0.702688	0	0
20734	u	novel	-1.08139	-0.0004096	chr14	+	136897882	136898462	MSTRG.11445.1	1	581	MSTRG.11445	.	15.3339	2.28827	0	0	0	0	4.13081	0.834436	0	0	0	0
20735	u	novel	-1.3886	-0.0004096	chr14	+	136904143	136904362	MSTRG.11446.1	1	220	MSTRG.11446	.	11.6682	1.74124	17.0455	1.89472	13.6364	1.79257	8.86364	1.79048	6.13636	0.761777	10.2955	1.6923
20737	u	novel	-1.1514	-0.0004096	chr14	+	136937448	136937916	MSTRG.11450.1	1	469	MSTRG.11450	.	10.6247	1.58553	0	0	0	0	0	0	0.639659	0.079408	0	0
20738	u	novel	-1.37186	-0.028672	chr14	+	136939396	136940139	MSTRG.11451.1	1	744	MSTRG.11451	.	5.74459	0.857262	0	0	0	0	0	0	0	0	9.94489	1.63468
20740	u	novel	-1.3285	-0.0004096	chr14	+	136945105	136945589	MSTRG.11453.1	1	485	MSTRG.11453	.	12.1423	1.81199	0	0	1.23711	0.162625	2.7835	0.562276	0	0	5.27629	0.867282
20741	u	novel	-1.22844	-0.036864	chr14	+	136959941	136961280	MSTRG.11454.1	1	1340	MSTRG.11454	.	0	0	13.291	1.47739	0	0	6.26866	1.26629	0	0	0	0
20747	u	novel	-1.30481	-0.0315392	chr14	+	136995795	136997920	MSTRG.11456.1	1	2126	MSTRG.11456	.	12.5771	1.87688	0	0	7.37253	0.969155	5.68768	1.14893	0	0	9.10348	1.49637
20744	u	novel	-1.29505	-0.077824	chr14	+	136975649	136990789	MSTRG.11458.1	1	15141	MSTRG.11458	.	13.8256	2.06318	2.25051	0.25016	2.85113	0.374795	0	0	1.56066	0.193743	6.76438	1.11189
20745	u	novel	-1.14941	-0.012288	chr14	+	136991990	136993794	MSTRG.11459.1	1	1805	MSTRG.11459	.	10.3551	1.54529	0	0	0	0	0	0	0	0	0	0
20746	u	novel	-1.31564	-0.0004096	chr14	+	136994302	136995235	MSTRG.11460.1	1	934	MSTRG.11460	.	11.9604	1.78484	0	0	10.0396	1.31976	5.29979	1.07057	12.2313	1.51841	0	0
20748	u	novel	-1.16707	-0.073728	chr14	+	137000548	137003081	MSTRG.11461.1	1	2534	MSTRG.11461	.	12.8942	1.9242	10.6227	1.18078	10.6326	1.39771	3.83149	0.773973	0	0	6.88398	1.13154
20750	u	novel	-1.12644	-0.0004096	chr14	+	137004794	137005352	MSTRG.11463.1	1	559	MSTRG.11463	.	9.70483	1.44825	0	0	0	0	0	0	0	0	0	0
20751	u	novel	-1.09241	-0.0004096	chr14	+	137006961	137007220	MSTRG.11464.1	1	260	MSTRG.11464	.	13.3346	1.98992	0	0	2.84615	0.374141	1.73077	0.349621	0	0	0	0
20752	u	novel	-1.37559	-0.0004096	chr14	+	137009381	137010618	MSTRG.11465.1	1	1238	MSTRG.11465	.	12.5299	1.86983	0	0	9.81422	1.29013	0	0	0	0	7.14944	1.17518
20753	u	novel	-1.12711	-0.196608	chr14	+	137011762	137013261	MSTRG.11466.1	1	1500	MSTRG.11466	.	17.4893	2.60993	13.0313	1.44852	11.826	1.55459	8.27933	1.67245	1.89733	0.235538	7.542	1.2397
20754	u	novel	-1.23489	-0.110592	chr14	+	137013538	137015877	MSTRG.11467.1	2	2007	MSTRG.11467	.	14.2987	2.13379	10.9636	1.21868	8.9637	1.17832	4.16188	0.840712	8.57349	1.06433	5.96402	0.980327
20756	u	novel	-1.15982	-0.0004096	chr14	+	137027672	137028345	MSTRG.11469.1	1	674	MSTRG.11469	.	6.9285	1.03394	0	0	0	0	0	0	0	0	10.0356	1.64959
2095	i	novel	-1.15292	-0.170803	chr1	+	125542908	125543145	MSTRG.1147.1	1	238	MSTRG.1147	ENSSSCG00000004596	69.5126	10.3733	103.647	11.5211	90.9244	11.9525	23.1345	4.67323	37.626	4.67095	47.1471	7.74972
20757	u	novel	-1.30603	-0.0004096	chr14	+	137029615	137031682	MSTRG.11470.1	1	2068	MSTRG.11470	.	9.2147	1.37511	0	0	0	0	2.9007	0.585951	0	0	0	0
20758	u	novel	-1.23624	-0.0393216	chr14	+	137032627	137040769	MSTRG.11471.1	1	8143	MSTRG.11471	.	13.6235	2.03303	0	0	8.71858	1.1461	0	0	2.49844	0.31016	1.74634	0.287053
20766	u	novel	-1.00098	-0.0004096	chr14	+	137056328	137056612	MSTRG.11472.1	1	285	MSTRG.11472	.	13.2246	1.9735	9.47368	1.05306	0	0	0.526316	0.106317	1.57895	0.196013	0	0
20759	u	novel	-1.30251	-0.0004096	chr14	+	137041173	137041962	MSTRG.11473.1	1	790	MSTRG.11473	.	11.4481	1.7084	0	0	0	0	0	0	0	0	0	0
20760	u	novel	-1.18449	-0.038912	chr14	+	137042432	137043080	MSTRG.11474.1	1	649	MSTRG.11474	.	12.7627	1.90457	0	0	0	0	4.84438	0.978579	0	0	4.11402	0.676236
20761	u	novel	-1.44472	-0.0004096	chr14	+	137043364	137043618	MSTRG.11475.1	1	255	MSTRG.11475	.	11.8039	1.7615	11.1569	1.24016	0	0	7.61961	1.53918	7.01961	0.871425	0	0
20762	u	novel	-1.16086	-0.142541	chr14	+	137044766	137045047	MSTRG.11476.1	1	282	MSTRG.11476	.	0	0	4.78723	0.532133	0	0	8.51064	1.71917	0	0	0	0
20763	u	novel	-1.32481	-0.049152	chr14	+	137045928	137048747	MSTRG.11477.1	1	2820	MSTRG.11477	.	13.066	1.94983	0	0	5.69327	0.748408	0	0	3.40849	0.423135	0	0
20764	u	novel	-1.35773	-0.02048	chr14	+	137050460	137053087	MSTRG.11478.1	1	2628	MSTRG.11478	.	11.1796	1.66833	0	0	0	0	0	0	0	0	0	0
20765	u	novel	-1.44537	-0.0004096	chr14	+	137054443	137054975	MSTRG.11479.1	1	533	MSTRG.11479	.	17.3058	2.58254	0	0	6.19137	0.813886	0	0	0	0	1.69418	0.278479
2096	u	novel	-1.07115	-0.129434	chr1	-	125670671	125670881	MSTRG.1148.1	1	211	MSTRG.1148	.	0	0	0.7109	0.079021	4.2654	0.560708	9.24171	1.86685	11.3744	1.41204	10.5498	1.7341
20767	u	novel	-1.07729	-0.11223	chr14	+	137058071	137058628	MSTRG.11480.1	1	558	MSTRG.11480	.	14.8656	2.21839	15.0215	1.66974	0	0	0	0	0	0	7.84767	1.28995
20768	u	novel	-1.08271	-0.0311296	chr14	+	137061006	137063513	MSTRG.11481.1	1	2508	MSTRG.11481	.	11.0845	1.65414	5.4047	0.600769	0	0	3.16986	0.640321	4.29665	0.533393	1.85766	0.305349
20769	u	novel	-1.11667	-0.028672	chr14	+	137068666	137075101	MSTRG.11482.1	1	6436	MSTRG.11482	.	12.7617	1.90442	5.77269	0.641673	6.98104	0.917692	4.46022	0.900979	0	0	4.0129	0.659613
20770	u	novel	-1.30876	-0.0004096	chr14	+	137082307	137082639	MSTRG.11483.1	1	333	MSTRG.11483	.	18.5916	2.77442	0	0	0	0	3.15315	0.636946	7.20721	0.894714	5.44144	0.894428
20771	u	novel	-1.38606	-0.1024	chr14	+	137084255	137084842	MSTRG.11484.1	1	588	MSTRG.11484	.	11.2364	1.6768	0	0	8.38776	1.10261	1.53061	0.309188	0.961968	0.11942	0	0
20772	u	novel	-1.22299	-0.0004096	chr14	+	137103718	137104143	MSTRG.11485.1	1	426	MSTRG.11485	.	10.6338	1.58688	0	0	2.11268	0.277722	0	0	2.46479	0.305983	1.06338	0.174791
20773	u	novel	-1.14305	-0.0618496	chr14	+	137113973	137114850	MSTRG.11486.1	1	878	MSTRG.11486	.	14.4271	2.15295	3.75854	0.417787	0	0	2.65604	0.536527	0	0	0	0
20774	u	novel	-1.22137	-0.0004096	chr14	+	137115707	137115954	MSTRG.11487.1	1	248	MSTRG.11487	.	0	0	0	0	0	0	0	0	12.0968	1.50171	8.52419	1.40115
20776	u	novel	-1.06654	-0.0192512	chr14	+	137117457	137119181	MSTRG.11489.1	1	1725	MSTRG.11489	.	12.1252	1.80944	0	0	0	0	3.9113	0.790095	0	0	0	0
2101	u	novel	-1.20703	-0.12329	chr1	+	126373299	126373533	MSTRG.1149.1	1	235	MSTRG.1149	.	12.7319	1.89998	0	0	2.54043	0.333951	9.48511	1.91602	0	0	10.1957	1.67591
20777	u	novel	-1.10096	-0.08192	chr14	+	137121043	137121933	MSTRG.11490.1	1	891	MSTRG.11490	.	10.1425	1.51357	0	0	3.7037	0.48687	6.89562	1.39294	6.38496	0.792639	0	0
20778	u	novel	-1.4316	-0.0004096	chr14	+	137122426	137122660	MSTRG.11491.1	1	235	MSTRG.11491	.	2.57021	0.383552	0	0	10.8511	1.42643	1.2766	0.257876	5.10638	0.633914	0.642553	0.105619
20782	u	novel	-1.03345	-0.0004096	chr14	+	137147840	137148439	MSTRG.11492.1	1	600	MSTRG.11492	.	14.01	2.09071	0	0	0	0	1.75	0.353505	0	0	0	0
20783	u	novel	-1.15333	-0.18432	chr14	+	137153117	137154149	MSTRG.11493.1	1	1033	MSTRG.11493	.	9.82962	1.46687	0	0	0	0	6.67957	1.34929	0	0	0	0
20781	u	novel	-1.28338	-0.0192512	chr14	+	137145722	137147161	MSTRG.11496.1	1	1440	MSTRG.11496	.	9.01806	1.34576	9.46111	1.05167	0	0	4.68542	0.946468	0	0	4.29306	0.705664
20785	u	novel	-1.12221	-0.217088	chr14	+	137164551	137165471	MSTRG.11498.1	1	921	MSTRG.11498	.	10.6374	1.58741	0	0	0	0	3.38111	0.682994	0	0	0	0
20786	u	novel	-1.10895	-0.0004096	chr14	+	137167542	137167922	MSTRG.11499.1	1	381	MSTRG.11499	.	0	0	0	0	0	0	2.28347	0.461267	0	0	11.4541	1.88274
229	u	novel	-1.37078	-0.0712704	chr1	-	13775076	13775326	MSTRG.115.1	1	251	MSTRG.115	.	35.3745	5.27892	27.3785	3.0433	26.2948	3.45658	19.5697	3.95314	28.6853	3.56103	32.9283	5.41254
20787	u	novel	-1.22071	-0.0004096	chr14	+	137169434	137170195	MSTRG.11500.1	1	762	MSTRG.11500	.	9.30578	1.3887	0	0	2.93577	0.385921	0	0	0	0	0	0
20788	u	novel	-1.30195	-0.0188416	chr14	+	137178848	137180427	MSTRG.11501.1	1	1580	MSTRG.11501	.	12.0475	1.79784	0	0	0	0	0	0	0	0	4.73797	0.778797
20789	u	novel	-1.38368	-0.0004096	chr14	+	137184413	137184665	MSTRG.11502.1	1	253	MSTRG.11502	.	1.82769	0.272746	0	0	0	0	10.0079	2.02163	0	0	0	0
20790	u	novel	-1.49001	-0.0004096	chr14	+	137197551	137197758	MSTRG.11503.1	1	208	MSTRG.11503	.	0	0	0	0	0	0	0	0	0	0	9.61538	1.58051
20791	u	novel	-1.41046	-0.08192	chr14	+	137207686	137207931	MSTRG.11504.1	1	246	MSTRG.11504	.	0	0	0	0	12.7724	1.67899	0	0	13.4146	1.66531	0	0
20792	u	novel	-1.15358	-0.069632	chr14	+	137209330	137209659	MSTRG.11505.1	1	330	MSTRG.11505	.	0	0	3.18182	0.353681	13.4303	1.76548	0	0	0	0	0	0
20793	u	novel	-1.13623	-0.008192	chr14	+	137244999	137245617	MSTRG.11506.1	1	619	MSTRG.11506	.	0	0	12.6494	1.40607	0	0	0	0	0	0	0	0
20794	u	novel	-1.1347	-0.008192	chr14	+	137247807	137248462	MSTRG.11507.1	1	656	MSTRG.11507	.	10.128	1.51141	0	0	0	0	0	0	0	0	0	0
20806	u	novel	-1.09586	-0.083968	chr14	+	137293988	137294440	MSTRG.11508.1	1	453	MSTRG.11508	.	10.2605	1.53117	0	0	2.60706	0.342711	2.55629	0.516379	0	0	0	0
20795	u	novel	-1.34436	-0.0004096	chr14	+	137258570	137258857	MSTRG.11509.1	1	288	MSTRG.11509	.	0	0	0	0	0	0	7.10417	1.43506	0	0	0	0
2104	x	novel	-1.12588	-0.0004096	chr1	+	126393961	126424548	MSTRG.1151.1	4	691	MSTRG.1151	MYZAP	14.2967	2.13349	4.7377	0.526627	12.152	1.59743	2.8987	0.585546	13.0003	1.61387	13.9899	2.29956
20796	u	novel	-1.11238	-0.0004096	chr14	+	137259497	137260041	MSTRG.11510.1	1	545	MSTRG.11510	.	16.6018	2.47749	0	0	0	0	0	0	0	0	0	0
20797	u	novel	-1.12664	-0.032768	chr14	+	137262352	137263613	MSTRG.11511.1	1	1262	MSTRG.11511	.	5.38431	0.803499	0	0	0	0	2.37718	0.480197	0	0	0	0
20798	u	novel	-1.12283	-0.0004096	chr14	+	137265861	137266147	MSTRG.11512.1	1	287	MSTRG.11512	.	0	0	0	0	0	0	0	0	0	0	9.94773	1.63514
20799	u	novel	-1.11423	-0.0004096	chr14	+	137267051	137267283	MSTRG.11513.1	1	233	MSTRG.11513	.	11.5021	1.71646	0	0	4.50644	0.592393	0	0	0	0	2.59227	0.426101
20800	u	novel	-1.22189	-0.065536	chr14	+	137268412	137269123	MSTRG.11514.1	1	712	MSTRG.11514	.	0	0	0	0	0	0	9.05899	1.82994	0	0	0	0
20801	u	novel	-1.34663	-0.0004096	chr14	+	137270040	137270463	MSTRG.11515.1	1	424	MSTRG.11515	.	14.9434	2.23	0	0	6.7217	0.8836	8.12264	1.6408	0	0	8.54717	1.40493
20802	u	novel	-1.46423	-0.0004096	chr14	+	137276105	137276318	MSTRG.11516.1	1	214	MSTRG.11516	.	0	0	0	0	0	0	0.584112	0.117992	0	0	0	0
20803	u	novel	-1.37675	-0.0004096	chr14	+	137283628	137284080	MSTRG.11517.1	1	453	MSTRG.11517	.	0	0	0	0	0	0	8.5894	1.73509	0	0	0	0
20805	u	novel	-1.32608	-0.077824	chr14	+	137288308	137288575	MSTRG.11519.1	1	268	MSTRG.11519	.	0	0	0	0	0	0	5.59701	1.13061	0	0	0	0
20807	u	novel	-1.09527	-0.0004096	chr14	+	137311280	137311552	MSTRG.11520.1	1	273	MSTRG.11520	.	0	0	0	0	0	0	0	0	10.9304	1.35692	0	0
20816	u	novel	-1.25141	-0.0004096	chr14	+	138146381	138146586	MSTRG.11522.1	1	206	MSTRG.11522	.	10.9951	1.6408	12.1845	1.35438	0	0	0	0	2.91262	0.361577	3.66505	0.602437
20820	u	novel	-1.47478	-0.0520192	chr14	-	138269346	138269567	MSTRG.11523.1	1	222	MSTRG.11523	.	29.2477	4.36463	9.85586	1.09554	2.7027	0.355284	0.675676	0.136489	6.72072	0.83432	7.48198	1.22984
20824	i	novel	-1.21228	-0.0004096	chr14	+	138346589	138346917	MSTRG.11526.1	1	329	MSTRG.11526	ENO4	10.0973	1.50681	1.82371	0.202717	0	0	0	0	0	0	0	0
20827	i	novel	-1.28558	-0.06144	chr14	-	138388649	138389101	MSTRG.11529.1	1	453	MSTRG.11529	SHTN1	0	0	0	0	0	0	0	0	0	0	15.2958	2.51422
20836	u	novel	-1.12094	-0.126976	chr14	-	138795953	138797162	MSTRG.11531.1	1	1210	MSTRG.11531	.	54.5331	8.13795	0	0	0	0	0	0	0	0	38.41	6.31358
20838	u	novel	-1.18321	-0.0233472	chr14	-	139028049	139034462	MSTRG.11535.1	2	6234	MSTRG.11535	.	26.3009	3.92488	19.6022	2.17891	18.3037	2.40611	18.4929	3.73562	28.2278	3.50424	27.7709	4.5648
20839	u	novel	-1.16409	-0.0233472	chr14	-	139028049	139034462	MSTRG.11535.2	2	3935	MSTRG.11535	.	11.0396	1.64743	12.5923	1.39972	10.6166	1.3956	3.01484	0.609006	17.8008	2.20981	16.7759	2.7575
20847	u	novel	-1.0011	-0.086016	chr14	+	139075026	139075809	MSTRG.11540.1	1	784	MSTRG.11540	.	0	0	0	0	0	0	0	0	5.73597	0.712072	0	0
20848	u	novel	-1.17782	-0.0004096	chr14	+	139079288	139079603	MSTRG.11541.1	1	316	MSTRG.11541	.	12.3449	1.84223	0	0	4.74683	0.623995	0	0	0	0	0	0
20849	u	novel	-1.06564	-0.0688128	chr14	+	139084751	139085489	MSTRG.11542.1	1	739	MSTRG.11542	.	0	0	0	0	0	0	8.32206	1.68108	0	0	11.2165	1.8437
20851	u	novel	-1.05238	-0.0004096	chr14	+	139087400	139087718	MSTRG.11544.1	1	319	MSTRG.11544	.	0.946708	0.141277	0	0	0	0	1.88088	0.379943	0	0	7.77116	1.27737
20855	u	novel	-1.30616	-0.109363	chr14	+	139307365	139307579	MSTRG.11547.1	1	215	MSTRG.11547	.	4.91628	0.733654	15.307	1.70147	0	0	5.54419	1.11994	15.3256	1.90254	3.51163	0.577218
20856	u	novel	-1.14055	-0.01024	chr14	-	139310237	139312607	MSTRG.11548.1	2	2244	MSTRG.11548	.	0	0	11.6626	1.29638	1.71272	0.225145	1.66236	0.335802	11.8472	1.47073	4.03879	0.66387
20859	u	novel	-1.18794	-0.024576	chr14	-	139330971	139332256	MSTRG.11550.1	1	1286	MSTRG.11550	.	2.69829	0.402665	2.15708	0.239774	3.10887	0.408676	8.61353	1.73996	22.4067	2.7816	7.13453	1.17273
20862	u	novel	-1.30317	-0.0004096	chr14	-	139582891	139583625	MSTRG.11553.1	1	735	MSTRG.11553	.	0	0	0	0	25.0327	3.29067	0	0	0	0	0	0
20871	u	novel	-1.17794	-0.0004096	chr14	-	140193456	140193959	MSTRG.11557.1	1	504	MSTRG.11557	.	0	0	14.123	1.56987	0	0	0	0	0	0	0	0
20874	u	novel	-1.10083	-0.045056	chr14	+	140278589	140278817	MSTRG.11559.1	1	229	MSTRG.11559	.	0	0	0	0	14.5022	1.90638	0	0	4.58515	0.569208	5.26201	0.864934
20881	u	novel	-1.41202	-0.0004096	chr14	+	140538135	140538859	MSTRG.11565.1	1	725	MSTRG.11565	.	0	0	0	0	7.03448	0.924717	0	0	0	0	8.53931	1.40364
2111	u	novel	-1.12035	-0.0004096	chr1	-	126720298	126720570	MSTRG.1157.1	1	273	MSTRG.1157	.	9.40293	1.4032	0	0	0	0	0	0	0	0	0	0
20901	u	novel	-1.31831	-0.22528	chr14	+	141077161	141077530	MSTRG.11573.1	1	370	MSTRG.11573	.	4.48919	0.66992	13.6486	1.51714	6.44324	0.846996	1.62162	0.327573	6.41081	0.795848	2.30811	0.379392
2112	u	novel	-1.1613	-0.180224	chr1	-	126732032	126732255	MSTRG.1158.1	1	224	MSTRG.1158	.	9.4375	1.40836	0	0	0	0	0	0	0	0	0	0
20935	u	novel	-1.10282	-0.024576	chr14	+	142867148	142867443	MSTRG.11584.1	1	296	MSTRG.11584	.	12.8986	1.92486	0	0	1.01351	0.133231	1.01351	0.204733	0	0	0	0
20966	u	novel	-1.10923	-0.0004096	chr14	+	143279276	143279659	MSTRG.11586.1	1	384	MSTRG.11586	.	3.93229	0.586814	8.17708	0.908938	12.0938	1.58978	2.92969	0.591806	9.36458	1.16253	8.77735	1.44276
2113	u	novel	-1.31869	-0.049152	chr1	-	126748216	126748649	MSTRG.1159.1	1	434	MSTRG.1159	.	7.64747	1.14123	0	0	0	0	6.91244	1.39633	0	0	0	0
21039	i	novel	-1.24043	-0.026624	chr14	-	144136587	144138133	MSTRG.11609.1	1	1547	MSTRG.11609	IKZF5	0	0	0	0	16.8494	2.21493	0	0	0	0	15.3387	2.52128
21059	u	novel	-1.4335	-0.0004096	chr14	-	145283378	145283578	MSTRG.11615.1	1	201	MSTRG.11615	.	13.5224	2.01794	0	0	0	0	0	0	0	0	0	0
2175	i	novel	-1.33882	-0.086016	chr1	+	127630235	127630515	MSTRG.1162.1	1	281	MSTRG.1162	ZNF280D	0	0	0	0	0	0	0	0	0	0	8.59787	1.41326
21069	u	novel	-1.27529	-0.069632	chr14	-	145626296	145626749	MSTRG.11622.1	1	454	MSTRG.11622	.	0	0	0	0	10.5727	1.38983	0	0	0	0	3.56388	0.585807
21073	u	novel	-1.29232	-0.110182	chr14	-	145754024	145754236	MSTRG.11625.1	1	213	MSTRG.11625	.	9.80751	1.46357	0	0	0	0	0	0	0	0	0	0
21074	u	novel	-1.35683	-0.0753664	chr14	-	145762235	145762564	MSTRG.11626.1	1	330	MSTRG.11626	.	1.81818	0.271327	19.0455	2.11703	12.3091	1.61809	9.97273	2.01452	17.5545	2.17925	11.8	1.93961
21082	u	novel	-1.0297	-0.024576	chr14	-	145974158	145974731	MSTRG.11632.1	1	574	MSTRG.11632	.	11.3049	1.68702	0	0	0	0	0	0	0	0	0	0
21085	u	novel	-1.0209	-0.022528	chr14	+	146039132	146040111	MSTRG.11635.1	1	980	MSTRG.11635	.	0	0	0	0	5.96326	0.7839	2.87755	0.581274	9.74592	1.20987	8.3	1.3643
21087	u	novel	-1.10192	-0.014336	chr14	+	146044287	146045201	MSTRG.11637.1	1	915	MSTRG.11637	.	15.6503	2.33548	0	0	0	0	10.8197	2.18561	0	0	0	0
21091	u	novel	-1.09792	-0.116736	chr14	-	146307654	146307860	MSTRG.11641.1	1	207	MSTRG.11641	.	11.6715	1.74173	0	0	0	0	3.62319	0.731895	0	0	0	0
21110	i	novel	-1.02367	-0.233882	chr14	-	146894051	146894259	MSTRG.11649.1	1	209	MSTRG.11649	FANK1	0	0	0	0	0	0	4.30622	0.86987	3.57416	0.443702	11.5359	1.89619
21119	u	novel	-1.14958	-0.045056	chr14	-	147831014	147831388	MSTRG.11651.1	1	375	MSTRG.11651	.	9.656	1.44096	0	0	0	0	0	0	0	0	0	0
21120	u	novel	-1.31893	-0.0212992	chr14	-	147835366	147835751	MSTRG.11652.1	1	386	MSTRG.11652	.	0	0	0	0	10.4249	1.3704	0	0	0	0	2.34715	0.385809
21121	u	novel	-1.25193	-0.090112	chr14	-	147841034	147841353	MSTRG.11653.1	1	320	MSTRG.11653	.	0	0	0	0	0	0	6.075	1.22717	12.1875	1.51297	0	0
21127	u	novel	-1.25326	-0.0004096	chr14	+	148092138	148092357	MSTRG.11659.1	1	220	MSTRG.11659	.	2.74546	0.409703	1.36364	0.151577	4.02727	0.529405	7.5	1.51502	0	0	0	0
2183	i	novel	-1.33457	-0.106496	chr1	-	128005841	128006286	MSTRG.1166.1	1	446	MSTRG.1166	TEX9	0	0	0	0	12.4439	1.63582	0	0	8.40807	1.04379	3.98879	0.655651
21129	u	novel	-1.16525	-0.0004096	chr14	-	148200994	148201328	MSTRG.11661.1	1	335	MSTRG.11661	.	9.46567	1.41256	0	0	0	0	0	0	0	0	0	0
21130	u	novel	-1.18269	-0.114688	chr14	-	148203673	148203923	MSTRG.11662.1	1	251	MSTRG.11662	.	9.6255	1.43641	0	0	0	0	0	0	0	0	0	0
21131	u	novel	-1.13076	-0.036864	chr14	-	148210586	148211168	MSTRG.11664.1	1	583	MSTRG.11664	.	0	0	0	0	8.4494	1.11071	0	0	0	0	0	0
21132	u	novel	-1.00642	-0.188416	chr14	-	148216979	148217335	MSTRG.11665.1	1	357	MSTRG.11665	.	10.9972	1.64111	0	0	0.840336	0.110466	1.68067	0.339501	0	0	0	0
21136	i	novel	-1.19007	-0.0315392	chr14	-	148232836	148240977	MSTRG.11668.1	1	8142	MSTRG.11668	FAM196A	0	0	13.1462	1.46128	0	0	2.86858	0.579462	0	0	5.82093	0.956806
2184	i	novel	-1.01692	-0.04096	chr1	-	128015008	128015642	MSTRG.1167.1	1	635	MSTRG.1167	TEX9	0	0	0	0	0	0	0	0	0	0	10.7008	1.75893
21138	i	novel	-1.0702	-0.131072	chr14	-	148248380	148249040	MSTRG.11670.1	1	661	MSTRG.11670	FAM196A	0	0	0	0	0	0	2.72315	0.550084	0	0	10.0514	1.65219
21142	u	novel	-1.239	-0.028672	chr14	-	148332595	148333058	MSTRG.11672.1	1	464	MSTRG.11672	.	11.3642	1.69588	0	0	0	0	1.93965	0.391816	0	0	0	0
21150	i	novel	-1.06473	-0.0004096	chr14	+	149075343	149075575	MSTRG.11674.1	1	233	MSTRG.11674	PTPRE	9.07296	1.35396	0	0	0	0	0.643777	0.130045	2.57511	0.319678	0	0
21179	i	novel	-1.07337	-0.0339968	chr14	+	150609242	150613174	MSTRG.11683.1	1	3933	MSTRG.11683	MGMT	0	0	0	0	8.64277	1.13613	0	0	5.81744	0.722186	0	0
21181	i	novel	-1.04871	-0.028672	chr14	+	150625317	150626071	MSTRG.11685.1	1	755	MSTRG.11685	MGMT	18.1629	2.71044	19.3854	2.15482	8.92715	1.17352	7.73245	1.56198	5.30861	0.659019	9.58676	1.57581
21183	i	novel	-1.23944	-0.098304	chr14	+	150629485	150629854	MSTRG.11687.1	1	370	MSTRG.11687	MGMT	9.38649	1.40074	0	0	0	0	0	0	0	0	0	0
21184	i	novel	-1.23273	-0.0004096	chr14	+	150640472	150641641	MSTRG.11688.1	1	1170	MSTRG.11688	MGMT	11.9701	1.78629	0	0	0	0	0	0	0	0	0	0
21194	u	novel	-1.12522	-0.0761856	chr14	-	151130047	151166669	MSTRG.11689.1	4	1172	MSTRG.11689	.	49.7679	7.42685	54.5802	6.06696	56.0448	7.36736	25.1502	5.08041	3.89463	0.483485	27.0307	4.44313
2186	i	novel	-1.08341	-0.0004096	chr1	-	128023137	128023490	MSTRG.1169.1	1	354	MSTRG.1169	TEX9	0	0	19.2825	2.14338	0	0	12.2881	2.48224	24.4661	3.03726	6.82486	1.12183
21198	j	novel	-1.18043	-0.0315392	chr14	+	152168605	152169820	MSTRG.11694.1	2	607	MSTRG.11694	ENSSSCG00000027988	7.28664	1.08738	17.7277	1.97056	11.0238	1.44914	3.70267	0.74795	13.4881	1.67443	6.06096	0.99626
21213	u	novel	-1.20537	-0.0823296	chr14	+	152522653	152522880	MSTRG.11698.1	1	228	MSTRG.11698	.	13.2456	1.97664	0	0	0	0	0	0	2.63158	0.326688	0	0
21215	u	novel	-1.0925	-0.0585728	chr14	+	152536834	152537603	MSTRG.11700.1	1	770	MSTRG.11700	.	0	0	0	0	12.6623	1.66453	4.09091	0.826376	0	0	9.4948	1.56069
21223	u	novel	-1.25827	-0.069632	chr14	-	153167151	153167432	MSTRG.11702.1	1	282	MSTRG.11702	.	14.4291	2.15325	14.8156	1.64685	10.922	1.43575	1.92199	0.388247	10.6383	1.32065	3.11702	0.512355
2188	i	novel	-1.18359	-0.028672	chr1	-	128035718	128037661	MSTRG.1171.1	1	1944	MSTRG.1171	TEX9	11.758	1.75464	12.7891	1.42159	10.0859	1.32584	0	0	12.4712	1.54819	6.91255	1.13624
21240	x	novel	-1.04661	-0.047104	chr14	+	153201810	153203353	MSTRG.11717.1	2	1396	MSTRG.11717	TUBGCP2	4.38841	0.654881	3.17908	0.353376	4.53041	0.595544	4.83088	0.975852	11.7572	1.45955	4.94484	0.812801
2190	u	novel	-1.18424	-0.107315	chr1	-	128134073	128135776	MSTRG.1172.1	1	1704	MSTRG.1172	.	9.10739	1.35909	0	0	0	0	0	0	0	0	0	0
21271	u	novel	-1.02715	-0.0679936	chr14	+	153835024	153838835	MSTRG.11722.1	1	3812	MSTRG.11722	.	0.826076	0.123275	0.836569	0.09299	0	0	2.47901	0.500768	14.6068	1.81331	0	0
21276	u	novel	-1.00716	-0.024576	chr15	-	479215	479484	MSTRG.11726.1	1	270	MSTRG.11726	.	19.4185	2.89782	17.6	1.95636	8.87778	1.16703	2.77778	0.56112	1.11111	0.137935	3.35556	0.551564
21279	u	novel	-1.30418	-0.016384	chr15	+	994188	1002101	MSTRG.11728.1	2	7817	MSTRG.11728	.	57.9995	8.65524	62.3961	6.93575	48.8276	6.41862	32.3725	6.53935	79.916	9.92089	45.2369	7.43575
21283	u	novel	-1.0177	-0.0004096	chr15	-	1519629	1520042	MSTRG.11730.1	1	414	MSTRG.11730	.	9.11836	1.36073	0	0	0.724638	0.095257	0	0	0	0	0	0
21284	u	novel	-1.20431	-0.0004096	chr15	-	1675443	1675730	MSTRG.11731.1	1	288	MSTRG.11731	.	10.4861	1.56484	0	0	1.61111	0.211788	0	0	0	0	1.04861	0.172364
21287	u	novel	-1.1974	-0.0004096	chr15	-	1825685	1826079	MSTRG.11734.1	1	395	MSTRG.11734	.	9.12911	1.36233	0	0	0	0	0	0	0	0	0	0
21299	i	novel	-1.30798	-0.0004096	chr15	+	3355959	3356446	MSTRG.11739.1	1	488	MSTRG.11739	ENSSSCG00000015667	2.47541	0.369404	0	0	0	0	7.68443	1.55228	0	0	4.6168	0.75888
21300	u	novel	-1.18373	-0.0004096	chr15	+	3402639	3403256	MSTRG.11740.1	1	618	MSTRG.11740	.	2.6877	0.401085	0	0	0	0	8.00971	1.61799	11.3754	1.41216	0	0
21301	u	novel	-1.04147	-0.0004096	chr15	+	3405677	3405930	MSTRG.11741.1	1	254	MSTRG.11741	.	0	0	0	0	0	0	0	0	0	0	9.51181	1.56349
21302	u	novel	-1.40871	-0.0004096	chr15	+	3414471	3414752	MSTRG.11742.1	1	282	MSTRG.11742	.	0	0	3.14894	0.350025	1.06383	0.139846	7.97872	1.61173	0	0	0	0
21303	u	novel	-1.21416	-0.036864	chr15	-	3480615	3481540	MSTRG.11743.1	1	926	MSTRG.11743	.	8.60367	1.28392	0	0	0	0	0	0	0	0	0	0
21304	u	novel	-1.15538	-0.0004096	chr15	+	3527693	3528036	MSTRG.11744.1	1	344	MSTRG.11744	.	0	0	0	0	0	0	6.97674	1.40932	0	0	0	0
21306	u	novel	-1.22491	-0.0004096	chr15	-	3534613	3534981	MSTRG.11746.1	1	369	MSTRG.11746	.	9.41192	1.40454	0	0	0	0	3.60434	0.728087	0	0	0	0
21307	u	novel	-1.26423	-0.0004096	chr15	-	3561702	3561917	MSTRG.11747.1	1	216	MSTRG.11747	.	0	0	0	0	0	0	0	0	0	0	12.5833	2.06837
21308	u	novel	-1.39365	-0.233472	chr15	+	3583259	3583670	MSTRG.11748.1	1	412	MSTRG.11748	.	0	0	0	0	0.728155	0.09572	6.91748	1.39735	0	0	3.25911	0.535711
2202	u	novel	-1.02435	-0.0004096	chr1	+	128264112	128265627	MSTRG.1175.1	1	1516	MSTRG.1175	.	10.1596	1.51612	0	0	8.10026	1.06482	9.77704	1.97499	10.9743	1.36236	0	0
21310	u	novel	-1.19326	-0.0004096	chr15	+	3595626	3596093	MSTRG.11750.1	1	468	MSTRG.11750	.	11.8953	1.77513	0	0	0	0	0	0	0	0	0	0
21311	u	novel	-1.17697	-0.0004096	chr15	-	3664812	3665658	MSTRG.11751.1	1	847	MSTRG.11751	.	9.62692	1.43662	0	0	4.58914	0.603265	0	0	0	0	5.5856	0.918123
21312	u	novel	-1.10769	-0.045056	chr15	-	3666696	3667211	MSTRG.11752.1	1	516	MSTRG.11752	.	0	0	0	0	8.13954	1.06998	3.19767	0.64594	0	0	6.43798	1.05823
21313	u	novel	-1.03478	-0.132301	chr15	-	3669844	3670174	MSTRG.11753.1	1	331	MSTRG.11753	.	0	0	0	0	0	0	0	0	1.78881	0.222065	10.4924	1.72468
21314	u	novel	-1.32245	-0.0004096	chr15	-	3671793	3672318	MSTRG.11754.1	1	526	MSTRG.11754	.	0	0	0	0	0	0	0	0	0	0	8.31939	1.36749
21315	u	novel	-1.22432	-0.0528384	chr15	-	3672687	3673287	MSTRG.11755.1	1	601	MSTRG.11755	.	0	0	0	0	1.4975	0.196854	0	0	0	0	8.77371	1.44216
21316	u	novel	-1.12884	-0.0004096	chr15	-	3673591	3674044	MSTRG.11756.1	1	454	MSTRG.11756	.	0	0	0	0	0	0	4.95595	1.00112	0	0	0	0
21317	u	novel	-1.26588	-0.0004096	chr15	-	3675075	3676313	MSTRG.11757.1	1	1239	MSTRG.11757	.	10.1493	1.51458	0	0	0	0	0	0	0	0	0	0
21318	u	novel	-1.29078	-0.0004096	chr15	-	3676652	3677369	MSTRG.11758.1	1	718	MSTRG.11758	.	0	0	0	0	0	0	13.0251	2.6311	0	0	0	0
21319	u	novel	-1.09146	-0.012288	chr15	-	3682185	3683339	MSTRG.11759.1	1	1155	MSTRG.11759	.	0	0	0	0	0	0	0	0	9.18662	1.14044	7.31861	1.20299
21320	u	novel	-1.06607	-0.024576	chr15	-	3685613	3686980	MSTRG.11760.1	1	1368	MSTRG.11760	.	11.8107	1.7625	0	0	10.5409	1.38566	6.4364	1.30017	0	0	0	0
21321	u	novel	-1.25714	-0.094208	chr15	-	3688241	3690122	MSTRG.11761.1	1	1882	MSTRG.11761	.	0	0	0	0	0	0	0	0	0	0	8.37566	1.37674
21322	u	novel	-1.11114	-0.0004096	chr15	-	3690750	3691350	MSTRG.11762.1	1	601	MSTRG.11762	.	11.8087	1.7622	0	0	0	0	0	0	0	0	0	0
21323	u	novel	-1.15927	-0.018432	chr15	-	3694450	3694929	MSTRG.11763.1	1	480	MSTRG.11763	.	13.8208	2.06248	0	0	0	0	0	0	0	0	6.92083	1.1376
21325	u	novel	-1.19002	-0.0167936	chr15	-	3703286	3707998	MSTRG.11765.1	1	4713	MSTRG.11765	.	0	0	0	0	0	0	6.9635	1.40665	5.06456	0.628722	4.99791	0.821524
21326	u	novel	-1.14874	-0.0053248	chr15	-	3710614	3711260	MSTRG.11766.1	1	647	MSTRG.11766	.	9.80216	1.46277	0	0	0	0	0	0	13.8903	1.72436	0	0
21327	u	novel	-1.0949	-0.073728	chr15	-	3716872	3722585	MSTRG.11768.1	1	5714	MSTRG.11768	.	9.41617	1.40517	0	0	0	0	0	0	8.90215	1.10513	0	0
21328	u	novel	-1.44741	-0.0004096	chr15	-	3722921	3724545	MSTRG.11769.1	1	1625	MSTRG.11769	.	11.6634	1.74052	0	0	0	0	4.15385	0.839089	9.68261	1.20201	3.89571	0.640351
2204	u	novel	-1.27113	-0.0077824	chr1	+	128270100	128270377	MSTRG.1177.1	1	278	MSTRG.1177	.	0	0	0	0	7.54317	0.991586	0	0	13.4892	1.67457	0.543165	0.089282
21330	u	novel	-1.21176	-0.036864	chr15	-	3729898	3737927	MSTRG.11771.1	1	8030	MSTRG.11771	.	9.94737	1.48444	7.76364	0.862981	0	0	0	0	9.70548	1.20485	5.62853	0.925181
21340	u	novel	-1.25545	-0.159744	chr15	-	8031700	8034526	MSTRG.11777.1	1	2827	MSTRG.11777	.	6.21012	0.926733	3.0612	0.340273	2.76265	0.363163	9.12345	1.84296	19.0269	2.36203	12.3166	2.02452
21343	u	novel	-1.15263	-0.0004096	chr15	+	8049145	8051183	MSTRG.11780.1	1	2039	MSTRG.11780	.	5.89554	0.879789	0	0	4.14762	0.545225	4.88573	0.986932	12.1339	1.50632	4.86131	0.799071
21347	u	novel	-1.23611	-0.0004096	chr15	-	8210189	8210689	MSTRG.11785.1	1	501	MSTRG.11785	.	12.6587	1.88905	6.28742	0.69889	0	0	4.45908	0.900748	3.89222	0.483186	0	0
21348	u	novel	-1.22065	-0.0004096	chr15	-	8216693	8217907	MSTRG.11786.1	1	1215	MSTRG.11786	.	0	0	0	0	0	0	0	0	0	0	10.1597	1.66998
21349	u	novel	-1.29907	-0.0356352	chr15	-	8218338	8219899	MSTRG.11787.1	1	1562	MSTRG.11787	.	10.0211	1.49545	0	0	0	0	3.93726	0.795339	0	0	0	0
21350	u	novel	-1.1677	-0.057344	chr15	-	8220304	8220996	MSTRG.11788.1	1	693	MSTRG.11788	.	9.0303	1.34759	0	0	0	0	0	0	0	0	10.3564	1.70232
21351	u	novel	-1.04543	-0.0016384	chr15	-	8221276	8225732	MSTRG.11789.1	2	3630	MSTRG.11789	.	15.4897	2.31153	16.4785	1.83169	13.2583	1.74286	10.1626	2.05288	16.6198	2.06321	14.7355	2.42213
21352	u	novel	-1.30044	-0.151552	chr15	-	8229030	8229617	MSTRG.11790.1	1	588	MSTRG.11790	.	1.79762	0.268258	0	0	0	0	6.61224	1.33569	0	0	0	0
21353	u	novel	-1.38825	-0.0004096	chr15	-	8230490	8230883	MSTRG.11791.1	1	394	MSTRG.11791	.	0	0	0	0	0	0	0	0	0	0	8.32741	1.36881
21355	u	novel	-1.35697	-0.0004096	chr15	-	8280652	8281092	MSTRG.11792.1	1	441	MSTRG.11792	.	8.78005	1.31024	3.40136	0.378084	2.38095	0.312988	0	0	0	0	0	0
21360	u	novel	-1.4105	-0.0004096	chr15	+	8427948	8428318	MSTRG.11795.1	1	371	MSTRG.11795	.	15.4663	2.30803	0	0	0	0	0	0	0	0	0	0
21361	u	novel	-1.08172	-0.0004096	chr15	+	8432388	8432678	MSTRG.11796.1	1	291	MSTRG.11796	.	9.34021	1.39383	0	0	3.31959	0.436376	0	0	0	0	6.8283	1.12239
21363	u	novel	-1.17642	-0.0004096	chr15	+	8462016	8462417	MSTRG.11798.1	1	402	MSTRG.11798	.	9.38308	1.40023	0.746269	0.082953	1.48507	0.19522	4.10448	0.829117	0	0	0	0
2192	u	novel	-1.19086	-0.0004096	chr1	-	128185227	128185970	MSTRG.1180.1	1	744	MSTRG.1180	.	10.1075	1.50834	4.43548	0.493034	0	0	0.403226	0.081453	0	0	5.11955	0.841517
21371	u	novel	-1.37012	-0.111002	chr15	+	9956039	9956266	MSTRG.11800.1	1	228	MSTRG.11800	.	10.5219	1.57018	15.7719	1.75316	20.9298	2.75133	1.96053	0.396032	6.42982	0.798208	7.77632	1.27822
21376	u	novel	-1.07655	-0.0004096	chr15	+	10509301	10511529	MSTRG.11805.1	1	2229	MSTRG.11805	.	0	0	0	0	11.7304	1.54201	0	0	0	0	5.3598	0.881009
21377	u	novel	-1.17945	-0.0004096	chr15	+	10511938	10513191	MSTRG.11806.1	1	1254	MSTRG.11806	.	0	0	11.4786	1.27592	8.95375	1.17701	0	0	0	0	0	0
21378	u	novel	-1.01321	-0.180224	chr15	+	10513553	10535425	MSTRG.11807.1	1	21873	MSTRG.11807	.	20.6881	3.08727	14.8004	1.64517	12.0928	1.58965	5.52352	1.11577	15.2757	1.89635	7.32182	1.20351
21379	u	novel	-1.14863	-0.0004096	chr15	+	10535860	10540609	MSTRG.11808.1	1	4750	MSTRG.11808	.	13.3602	1.99374	12.3691	1.3749	9.70421	1.27567	4.26042	0.860618	12.8149	1.59087	5.508	0.905369
21380	u	novel	-1.27766	-0.098304	chr15	+	10540878	10542841	MSTRG.11809.1	1	1964	MSTRG.11809	.	12.5117	1.86712	7.87882	0.875784	0	0	2.43126	0.491123	0	0	0	0
2193	u	novel	-1.19608	-0.0843776	chr1	-	128189060	128190782	MSTRG.1181.1	1	1723	MSTRG.1181	.	0	0	0	0	1.2188	0.160218	2.67447	0.540251	0	0	0	0
21382	u	novel	-1.16801	-0.028672	chr15	+	10554154	10558121	MSTRG.11811.1	1	3968	MSTRG.11811	.	13.438	2.00535	8.87878	0.986936	6.15197	0.808706	3.42742	0.692349	9.27797	1.15178	5.32182	0.874767
21383	u	novel	-1.20783	-0.136806	chr15	+	10558559	10564286	MSTRG.11812.1	1	5728	MSTRG.11812	.	16.6837	2.4897	10.3439	1.1498	6.52479	0.857716	3.3867	0.684123	2.29467	0.284864	5.45182	0.896134
21389	u	novel	-1.38486	-0.0004096	chr15	+	10610806	10611970	MSTRG.11814.1	1	1165	MSTRG.11814	.	12.4661	1.86031	11.4163	1.269	8.06867	1.06067	5.35622	1.08197	7.92361	0.983648	0	0
21390	u	novel	-1.2527	-0.077824	chr15	+	10612629	10615138	MSTRG.11815.1	1	2510	MSTRG.11815	.	12.0908	1.80431	0	0	0	0	0	0	0	0	5.09124	0.836864
21392	u	novel	-1.0897	-0.073728	chr15	+	10617364	10619469	MSTRG.11817.1	1	2106	MSTRG.11817	.	9.58262	1.43001	0	0	6.89791	0.906764	0	0	9.90883	1.2301	4.87417	0.801184
21396	u	novel	-1.10457	-0.0004096	chr15	+	10630353	10630663	MSTRG.11818.1	1	311	MSTRG.11818	.	6.77813	1.0115	0	0	4.34084	0.570624	2.89389	0.584575	0	0	8.73955	1.43655
21393	u	novel	-1.37438	-0.0172032	chr15	+	10620190	10622003	MSTRG.11819.1	1	1814	MSTRG.11819	.	16.5882	2.47545	6.42337	0.714001	5.28886	0.695247	3.04355	0.614806	9.42062	1.16949	4.3269	0.711228
2194	u	novel	-1.04228	-0.090112	chr1	-	128196694	128198856	MSTRG.1182.1	2	727	MSTRG.1182	.	10.2847	1.53479	3.54042	0.393542	1.62347	0.213413	2.22425	0.449305	4.22971	0.525083	2.49243	0.40969
21385	u	novel	-1.12753	-0.0561152	chr15	+	10567517	10577910	MSTRG.11822.1	1	10394	MSTRG.11822	.	15.9705	2.38327	9.77933	1.08704	0	0	5.05542	1.02121	0	0	0	0
21386	u	novel	-1.03802	-0.045056	chr15	+	10579240	10593356	MSTRG.11823.1	1	14117	MSTRG.11823	.	17.1915	2.56549	8.60988	0.957047	3.71332	0.488134	0	0	9.94624	1.23474	3.21746	0.528865
21388	u	novel	-1.10919	-0.0151552	chr15	+	10604915	10608943	MSTRG.11825.1	1	4029	MSTRG.11825	.	11.3343	1.69142	0	0	0	0	0	0	0	0	1.05237	0.172982
21397	u	novel	-1.25144	-0.217088	chr15	+	10631291	10633061	MSTRG.11826.1	1	1771	MSTRG.11826	.	14.1366	2.10961	0	0	3.28684	0.432072	2.70412	0.546241	7.40316	0.91904	4.05647	0.666775
21399	u	novel	-1.27108	-0.110592	chr15	+	10645507	10647318	MSTRG.11828.1	1	1812	MSTRG.11828	.	8.33168	1.24333	0	0	0	0	0	0	0	0	0	0
21402	u	novel	-1.4719	-0.0004096	chr15	+	10730952	10731228	MSTRG.11831.1	1	277	MSTRG.11831	.	10.3574	1.54563	0	0	0	0	0	0	0	0	0	0
21403	u	novel	-1.13239	-0.0004096	chr15	+	10735101	10735553	MSTRG.11832.1	1	453	MSTRG.11832	.	19.521	2.91311	4.30464	0.478489	0	0	0	0	0	0	2.66667	0.438329
21404	u	novel	-1.14116	-0.823296	chr15	+	10789040	10789364	MSTRG.11833.1	1	325	MSTRG.11833	.	0	0	0	0	10.7631	1.41486	0	0	11.3846	1.4133	4.64615	0.763704
21407	u	novel	-1.24028	-0.0139264	chr15	+	12614257	12614502	MSTRG.11835.1	1	246	MSTRG.11835	.	17.1504	2.55935	35.7724	3.97634	36.9512	4.85742	10.3659	2.09393	16.1395	2.00358	15.9268	2.61795
21408	u	novel	-1.19338	-0.113869	chr15	+	12752705	12753013	MSTRG.11836.1	1	309	MSTRG.11836	.	4.88673	0.729245	9.1521	1.01732	14.0777	1.85058	6.54369	1.32184	8.67961	1.0775	8.30744	1.36552
21412	u	novel	-1.1323	-0.0524288	chr15	-	14978351	14978708	MSTRG.11837.1	1	358	MSTRG.11837	.	46.3939	6.92334	47.2626	5.25355	44.3911	5.83542	13.4078	2.70842	22.933	2.84693	18.5251	3.04504
21417	i	novel	-1.09977	-0.0004096	chr15	-	15302621	15302905	MSTRG.11839.1	1	285	MSTRG.11839	SPOPL	1.05965	0.158131	0	0	0	0	7.86667	1.58909	0	0	0	0
2198	i	novel	-1.13353	-0.0598016	chr1	+	128202737	128213919	MSTRG.1184.1	1	11183	MSTRG.1184	ENSSSCG00000024210	14.1048	2.10485	12.9045	1.43442	11.6052	1.52556	0	0	0	0	8.30877	1.36574
21418	i	novel	-1.05206	-0.053248	chr15	-	15328025	15328485	MSTRG.11840.1	1	461	MSTRG.11840	SPOPL	3.59617	0.536655	0	0	0	0	6.50759	1.31455	0	0	0	0
21419	i	novel	-1.33684	-0.1024	chr15	-	15330541	15330945	MSTRG.11841.1	1	405	MSTRG.11841	SPOPL	10.5407	1.57299	0	0	0	0	0	0	0	0	0	0
21420	i	novel	-1.217	-0.008192	chr15	-	15336455	15336789	MSTRG.11842.1	1	335	MSTRG.11842	SPOPL	12.6209	1.88341	0	0	0	0	0	0	0	0	0	0
21421	i	novel	-1.14393	-0.0004096	chr15	-	15343217	15343787	MSTRG.11843.1	1	571	MSTRG.11843	SPOPL	12.1646	1.81532	0	0	0	0	0	0	6.71804	0.833987	0	0
21422	i	novel	-1.24394	-0.0004096	chr15	-	15344831	15345134	MSTRG.11844.1	1	304	MSTRG.11844	SPOPL	5.90618	0.881377	0	0	7.36842	0.968615	13.3224	2.69116	0	0	0	0
21423	i	novel	-1.1023	-0.094208	chr15	-	15348320	15350127	MSTRG.11845.1	1	1808	MSTRG.11845	SPOPL	1.37837	0.205694	0	0	0	0	0	0	0	0	0	0
21424	u	novel	-1.33014	-0.0221184	chr15	+	15352129	15353149	MSTRG.11846.1	1	1021	MSTRG.11846	.	0	0	0	0	10.2752	1.35073	0	0	0	0	0	0
21426	u	novel	-1.41348	-0.012288	chr15	+	15365562	15365848	MSTRG.11848.1	1	287	MSTRG.11848	.	0	0	0	0	1.58595	0.208481	0	0	0	0	9.96864	1.63858
21427	u	novel	-1.34089	-0.014336	chr15	+	15368301	15368618	MSTRG.11849.1	1	318	MSTRG.11849	.	0	0	0	0	0	0	9.42138	1.90315	6.10377	0.757732	0	0
2199	i	novel	-1.05306	-0.065536	chr1	+	128216354	128224409	MSTRG.1185.1	1	8056	MSTRG.1185	ENSSSCG00000024210	11.1888	1.6697	11.9852	1.33224	8.57063	1.12665	0	0	12.2289	1.51811	7.81691	1.28489
21428	u	novel	-1.12116	-0.0679936	chr15	+	15372720	15373360	MSTRG.11850.1	1	641	MSTRG.11850	.	10.3557	1.54538	0	0	0	0	0	0	0	0	1.92788	0.316892
21429	u	novel	-1.08936	-0.155238	chr15	+	15375790	15376097	MSTRG.11851.1	1	308	MSTRG.11851	.	11.276	1.68271	15.5844	1.73231	0	0	0	0	0	0	0	0
21434	u	novel	-1.22002	-0.0004096	chr15	-	18083279	18083505	MSTRG.11854.1	1	227	MSTRG.11854	.	3.99119	0.595604	0	0	0	0	3.30396	0.667411	13.2159	1.64064	8.1395	1.33792
21435	u	novel	-1.26983	-0.10281	chr15	+	18084871	18085093	MSTRG.11855.1	1	223	MSTRG.11855	.	0.67713	0.101048	7.66816	0.852368	0.672646	0.088423	7.38565	1.49192	13.4529	1.67006	3.88341	0.638329
21438	u	novel	-1.46847	-0.117555	chr15	+	18257546	18257767	MSTRG.11856.1	1	222	MSTRG.11856	.	13.4955	2.01393	22.9054	2.54609	23.6486	3.10873	17.536	3.54233	10.1351	1.25819	19.6126	3.22379
21440	u	novel	-1.11623	-0.0004096	chr15	+	18421355	18421592	MSTRG.11858.1	1	238	MSTRG.11858	.	0	0	12.5546	1.39553	5.04202	0.662798	0	0	0	0	0	0
21441	u	novel	-1.33777	-0.0004096	chr15	+	18427617	18427856	MSTRG.11859.1	1	240	MSTRG.11859	.	10.0667	1.50225	0	0	0	0	1.08333	0.218837	0	0	0	0
2200	i	novel	-1.16793	-0.016384	chr1	+	128229945	128231647	MSTRG.1186.1	1	1703	MSTRG.1186	ENSSSCG00000024210	0	0	10.8884	1.21032	0	0	8.05344	1.62682	13.8456	1.71881	0	0
21443	u	novel	-1.0198	-0.0004096	chr15	-	18465719	18465947	MSTRG.11860.1	1	229	MSTRG.11860	.	13.3428	1.99114	14.5459	1.61687	17.4978	2.30017	7.53275	1.52164	15.2948	1.89871	22.5699	3.70989
21449	u	novel	-1.39608	-0.0004096	chr15	-	18637707	18638240	MSTRG.11865.1	1	534	MSTRG.11865	.	0	0	0	0	0	0	0	0	0	0	8.48315	1.3944
21450	u	novel	-1.04801	-0.0004096	chr15	-	18644156	18644496	MSTRG.11866.1	1	341	MSTRG.11866	.	0	0	0	0	0	0	0	0	0	0	1.07315	0.176397
2208	u	novel	-1.05647	-0.1024	chr1	-	128358448	128358680	MSTRG.1187.1	1	233	MSTRG.1187	.	10.8069	1.61271	18.5064	2.05712	22.4034	2.94504	13.0858	2.64338	37.897	4.70459	27.0086	4.43949
21486	u	novel	-1.08223	-0.0004096	chr15	+	18839454	18839686	MSTRG.11870.1	1	233	MSTRG.11870	.	14.2575	2.12764	6.41202	0.712739	1.93133	0.253883	0	0	0	0	0	0
21488	i	novel	-1.30563	-0.0004096	chr15	-	19008323	19008571	MSTRG.11872.1	1	249	MSTRG.11872	ZRANB3	13.3414	1.99093	0	0	1.80723	0.237569	0	0	0	0	0	0
21490	u	novel	-1.41736	-0.0004096	chr15	-	19198475	19198700	MSTRG.11873.1	1	226	MSTRG.11873	.	0	0	0	0	3.31858	0.436244	6.63717	1.34073	0	0	0	0
21472	i	novel	-1.02266	-0.229376	chr15	-	18758583	18759871	MSTRG.11878.1	1	1289	MSTRG.11878	ENSSSCG00000015692	9.01319	1.34503	0	0	5.0993	0.670328	0	0	0	0	0.750274	0.123325
21473	i	novel	-1.34896	-0.0004096	chr15	-	18761024	18761274	MSTRG.11879.1	1	251	MSTRG.11879	ENSSSCG00000015692	13.1554	1.96317	0	0	0	0	0	0	0	0	0	0
21475	i	novel	-1.06836	-0.110592	chr15	-	18766834	18767944	MSTRG.11881.1	1	1111	MSTRG.11881	ENSSSCG00000015692	0	0	0	0	8.86049	1.16475	0	0	1.89019	0.234651	0	0
21476	i	novel	-1.14399	-0.208896	chr15	-	18769952	18772420	MSTRG.11882.1	1	2469	MSTRG.11882	ENSSSCG00000015692	9.33779	1.39347	0	0	8.02847	1.05538	0	0	0	0	5.84285	0.96041
21477	i	novel	-1.12812	-0.0208896	chr15	-	18774362	18776759	MSTRG.11883.1	1	2398	MSTRG.11883	ENSSSCG00000015692	14.8636	2.21809	13.2077	1.46812	7.74896	1.01864	1.39788	0.282376	0	0	0	0
21478	i	novel	-1.05925	-0.0004096	chr15	-	18777834	18778299	MSTRG.11884.1	1	466	MSTRG.11884	ENSSSCG00000015692	26.1438	3.90143	14.1631	1.57432	0	0	6.33906	1.28051	13.2811	1.64874	1.62017	0.266313
21479	i	novel	-1.21456	-0.004096	chr15	-	18778576	18779697	MSTRG.11885.1	1	1122	MSTRG.11885	ENSSSCG00000015692	0	0	12.8476	1.4281	0	0	0	0	0	0	0	0
21480	i	novel	-1.14838	-0.008192	chr15	-	18781195	18785569	MSTRG.11886.1	1	4375	MSTRG.11886	ENSSSCG00000015692	0	0	14.0059	1.55686	7.98354	1.04948	4.05486	0.819093	5.93051	0.736223	0	0
21481	i	novel	-1.17243	-0.065536	chr15	-	18785942	18791975	MSTRG.11887.1	1	6034	MSTRG.11887	ENSSSCG00000015692	0	0	14.9148	1.65788	1.34229	0.176451	4.07176	0.822508	0	0	4.96031	0.815344
21482	i	novel	-1.34908	-0.049152	chr15	-	18794382	18796612	MSTRG.11888.1	1	2231	MSTRG.11888	ENSSSCG00000015692	16.4957	2.46165	0	0	12.266	1.61242	3.61945	0.73114	5.59964	0.695148	0	0
21483	i	novel	-1.10748	-0.024576	chr15	-	18797313	18798925	MSTRG.11889.1	1	1613	MSTRG.11889	ENSSSCG00000015692	13.9492	2.08163	0	0	0	0	0	0	0	0	0	0
2219	u	novel	-1.31347	-0.0004096	chr1	+	128529604	128530159	MSTRG.1189.1	1	556	MSTRG.1189	.	4.34532	0.648451	0	0	2.63309	0.346133	3.14748	0.635801	6.38489	0.79263	8.39209	1.37944
21495	u	novel	-1.23834	-0.0004096	chr15	-	19276717	19277536	MSTRG.11893.1	1	820	MSTRG.11893	.	10.6805	1.59384	4.8493	0.539032	0	0	0	0	4.86341	0.603751	0	0
21496	u	novel	-1.12914	-0.0233472	chr15	-	19278498	19279255	MSTRG.11894.1	1	758	MSTRG.11894	.	0	0	0	0	0	0	7.3219	1.47905	0	0	7.13984	1.1736
21497	u	novel	-1.12308	-0.028672	chr15	-	19280579	19282344	MSTRG.11895.1	1	1766	MSTRG.11895	.	9.30804	1.38904	0	0	0	0	0	0	0	0	0	0
21498	u	novel	-1.41118	-0.057344	chr15	-	19284447	19284859	MSTRG.11896.1	1	413	MSTRG.11896	.	12.0654	1.80051	2.34824	0.261023	7.99031	1.05037	0	0	0	0	0	0
21499	u	novel	-1.24766	-0.0466944	chr15	+	19287626	19290690	MSTRG.11897.1	1	3065	MSTRG.11897	.	9.92137	1.48056	0	0	6.69886	0.880598	4.72887	0.955247	0	0	5.11452	0.840691
21500	u	novel	-1.16415	-0.0004096	chr15	+	19294611	19294844	MSTRG.11898.1	1	234	MSTRG.11898	.	0	0	13.4274	1.49254	0	0	0	0	0	0	0	0
237	u	novel	-1.08416	-0.0192512	chr1	-	14319832	14320172	MSTRG.119.1	1	341	MSTRG.119	.	73.5073	10.9695	106.416	11.8289	76.7214	10.0854	100.411	20.2832	196.534	24.398	123.191	20.2493
21502	u	novel	-1.07933	-0.0004096	chr15	+	19297964	19298182	MSTRG.11900.1	1	219	MSTRG.11900	.	9.65297	1.44051	0	0	0	0	0	0	0	0	0	0
21503	u	novel	-1.14744	-0.0004096	chr15	+	19298852	19299221	MSTRG.11901.1	1	370	MSTRG.11901	.	7.34595	1.09623	9.17739	1.02013	0	0	9.31351	1.88136	0	0	0	0
21504	u	novel	-1.01328	-0.0004096	chr15	+	19314306	19314647	MSTRG.11902.1	1	342	MSTRG.11902	.	5.73977	0.856543	0	0	0	0	0	0	0	0	0	0
21506	u	novel	-1.21598	-0.0262144	chr15	+	19328550	19330501	MSTRG.11904.1	1	1952	MSTRG.11904	.	12.1906	1.81919	0	0	0	0	0	0	0	0	8.09016	1.32981
21507	u	novel	-1.23833	-0.065536	chr15	+	19331750	19334416	MSTRG.11905.1	1	2667	MSTRG.11905	.	6.9955	1.04394	0	0	0	0	4.09599	0.827402	0	0	7.21072	1.18525
21508	u	novel	-1.08244	-0.0913408	chr15	+	19334864	19335445	MSTRG.11906.1	1	582	MSTRG.11906	.	0	0	17.9141	1.99127	0	0	9.51031	1.92111	6.36942	0.790709	0	0
2212	i	novel	-1.22596	-0.0004096	chr1	+	128413442	128413665	MSTRG.1191.1	1	224	MSTRG.1191	ENSSSCG00000029459	4.71875	0.704177	0	0	10.683	1.40434	4.58036	0.925246	3.34821	0.415652	0	0
21512	u	novel	-1.15806	-0.032768	chr15	-	19341533	19341789	MSTRG.11910.1	1	257	MSTRG.11910	.	0	0	14.4669	1.6081	4.45136	0.585153	2.85603	0.576927	5.25292	0.652105	7.48249	1.22992
21527	u	novel	-1.33269	-0.055296	chr15	+	19498991	19501585	MSTRG.11911.1	1	2595	MSTRG.11911	.	0	0	2.94335	0.327174	2.39422	0.314732	2.65896	0.537118	9.55133	1.18572	15.8143	2.59944
21518	i	novel	-1.00226	-0.0004096	chr15	-	19450385	19450676	MSTRG.11916.1	1	292	MSTRG.11916	ENSSSCG00000015697	63.1644	9.426	45.4829	5.05573	0	0	19.8082	4.00132	6.50826	0.807946	39.2397	6.44997
21520	u	novel	-1.14947	-0.01024	chr15	+	19473911	19483087	MSTRG.11917.1	2	990	MSTRG.11917	.	6.34921	0.947489	0	0	7.62929	1.00291	16.0098	3.23404	2.32166	0.288215	3.92998	0.645985
21519	u	novel	-1.15474	-0.0499712	chr15	+	19473911	19482801	MSTRG.11917.2	2	729	MSTRG.11917	.	0	0	6.59636	0.73323	0	0	0.588374	0.118853	2.30058	0.285597	32.1349	5.28212
21521	u	novel	-1.11456	-0.028672	chr15	+	19473987	19481585	MSTRG.11917.3	2	1294	MSTRG.11917	.	1.517	0.226382	4.48085	0.498077	0	0	6.61393	1.33603	6.83125	0.848042	11.5606	1.90026
21522	u	novel	-1.12508	-0.135168	chr15	+	19483355	19484212	MSTRG.11918.1	1	858	MSTRG.11918	.	7.03963	1.05052	0	0	0	0	17.5373	3.54259	0	0	0	0
21523	u	novel	-1.35941	-0.0004096	chr15	+	19484522	19484894	MSTRG.11919.1	1	373	MSTRG.11919	.	0	0	0	0	0	0	11.6542	2.35418	0	0	0	0
21526	u	novel	-1.23997	-0.0483328	chr15	+	19498211	19498616	MSTRG.11922.1	1	406	MSTRG.11922	.	0	0	0	0	0.738916	0.097134	1.47783	0.298527	2.95567	0.366921	12.2044	2.00608
21533	i	novel	-1.33588	-0.032768	chr15	-	19531505	19532519	MSTRG.11925.1	1	1015	MSTRG.11925	ACMSD	0	0	0	0	0.44335	0.058281	1.28867	0.260315	0	0	8.58128	1.41053
21547	u	novel	-1.10254	-0.008192	chr15	-	20285910	20286846	MSTRG.11927.1	1	937	MSTRG.11927	.	9.15688	1.36648	0	0	0	0	0	0	0	0	0	0
21548	u	novel	-1.02433	-0.0442368	chr15	-	20294763	20295343	MSTRG.11928.1	1	581	MSTRG.11928	.	1.55938	0.232706	0	0	12.1343	1.59511	0.516351	0.104304	2.54733	0.31623	0	0
21549	u	novel	-1.03419	-0.0004096	chr15	-	20299070	20299401	MSTRG.11929.1	1	332	MSTRG.11929	.	0	0	0	0	0	0	0.451807	0.091266	0	0	8.61446	1.41599
2214	i	novel	-1.27314	-0.0004096	chr1	-	128439106	128439802	MSTRG.1193.1	1	697	MSTRG.1193	ENSSSCG00000029459	10.2956	1.5364	0	0	2.7977	0.367772	0	0	0	0	0	0
21551	u	novel	-1.33636	-0.049152	chr15	-	20306118	20306413	MSTRG.11933.1	1	296	MSTRG.11933	.	0	0	0	0	8.57432	1.12714	0	0	0	0	0	0
21552	u	novel	-1.16999	-0.0282624	chr15	-	20315838	20316428	MSTRG.11934.1	1	591	MSTRG.11934	.	10.4704	1.56249	0	0	0	0	0	0	0	0	0	0
21555	u	novel	-1.27923	-0.114688	chr15	-	20330779	20331623	MSTRG.11937.1	1	845	MSTRG.11937	.	5.3574	0.799482	0	0	8.52071	1.12009	2.13018	0.430302	0	0	1.88757	0.310267
2215	i	novel	-1.04433	-0.077824	chr1	+	128496790	128497406	MSTRG.1194.1	1	617	MSTRG.1194	ENSSSCG00000029459	9.04538	1.34984	0	0	0	0	1.9449	0.392875	0	0	0	0
21558	u	novel	-1.25014	-0.159744	chr15	-	20339967	20340976	MSTRG.11940.1	1	1010	MSTRG.11940	.	6.48119	0.967185	0	0	0	0	0	0	0	0	0	0
21559	u	novel	-1.25237	-0.0651264	chr15	-	20341814	20342775	MSTRG.11941.1	1	962	MSTRG.11941	.	9.60499	1.43335	0	0	6.16632	0.810593	0	0	3.58316	0.444819	0	0
21560	u	novel	-1.24571	-0.258048	chr15	-	20347123	20349153	MSTRG.11942.1	1	2031	MSTRG.11942	.	12.031	1.79538	0	0	0	0	0	0	0	0	0	0
21564	u	novel	-1.22838	-0.0004096	chr15	-	20367270	20367512	MSTRG.11945.1	1	243	MSTRG.11945	.	10.5638	1.57643	0	0	0	0	0	0	0	0	0	0
21569	u	novel	-1.20361	-0.0004096	chr15	-	22136077	22136885	MSTRG.11949.1	1	809	MSTRG.11949	.	8.39926	1.25342	0.341162	0.037922	0	0	0.741656	0.149817	0	0	1.1199	0.184082
2216	i	novel	-1.31737	-0.110592	chr1	+	128497891	128498613	MSTRG.1195.1	1	723	MSTRG.1195	ENSSSCG00000029459	8.5574	1.27702	6.18811	0.68785	0	0	0	0	0	0	0	0
21570	u	novel	-1.12035	-0.0004096	chr15	-	22151879	22152164	MSTRG.11950.1	1	286	MSTRG.11950	.	10.0315	1.49699	0	0	0	0	0	0	0	0	0	0
21572	u	novel	-1.06534	-0.073728	chr15	-	22181476	22182095	MSTRG.11951.1	1	620	MSTRG.11951	.	0	0	0	0	0	0	0	0	0	0	2.67903	0.440362
21573	u	novel	-1.21195	-0.0004096	chr15	-	22188497	22188855	MSTRG.11952.1	1	359	MSTRG.11952	.	10.4708	1.56255	0	0	0	0	0	0	0	0	0	0
21590	u	novel	-1.16326	-0.004096	chr15	-	22288209	22289566	MSTRG.11956.1	1	1358	MSTRG.11956	.	9.30486	1.38856	0	0	0	0	3.86598	0.780939	0	0	0	0
21574	u	novel	-1.22177	-0.18432	chr15	-	22241235	22241571	MSTRG.11957.1	1	337	MSTRG.11957	.	0	0	0	0	0	0	0.890208	0.179825	11.1276	1.3814	1.34421	0.220953
21575	u	novel	-1.19063	-0.045056	chr15	-	22245799	22246821	MSTRG.11958.1	1	1023	MSTRG.11958	.	0	0	12.4301	1.38169	0	0	0	0	0	0	0	0
2217	i	novel	-1.27519	-0.0004096	chr1	+	128507796	128508072	MSTRG.1196.1	1	277	MSTRG.1196	ENSSSCG00000029459	10.3574	1.54563	0	0	0	0	0	0	0	0	0	0
21577	u	novel	-1.34167	-0.0131072	chr15	-	22251696	22252561	MSTRG.11960.1	1	866	MSTRG.11960	.	11.6386	1.73682	14.1478	1.57262	13.7771	1.81107	4.50346	0.909714	11.0785	1.3753	8.25173	1.35637
21578	u	novel	-1.07487	-0.0004096	chr15	-	22253546	22253754	MSTRG.11961.1	1	209	MSTRG.11961	.	11.5598	1.72507	2.15311	0.239333	0	0	0	0	0	0	2.88995	0.475031
21579	u	novel	-1.20696	-0.053248	chr15	-	22255471	22256361	MSTRG.11962.1	1	891	MSTRG.11962	.	0	0	0	0	11.7396	1.54323	0	0	3.367	0.417985	0	0
21580	u	novel	-1.16255	-0.0004096	chr15	-	22258292	22258507	MSTRG.11963.1	1	216	MSTRG.11963	.	9.78704	1.46052	0	0	0	0	0	0	0	0	0	0
21582	u	novel	-1.13002	-0.02048	chr15	-	22267136	22269612	MSTRG.11965.1	1	2477	MSTRG.11965	.	0	0	0	0	0	0	0	0	6.21598	0.771661	0	0
21583	u	novel	-1.30027	-0.053248	chr15	-	22270918	22272293	MSTRG.11966.1	1	1376	MSTRG.11966	.	10.5283	1.57114	0	0	0	0	0	0	5.9005	0.732497	0	0
21584	u	novel	-1.07045	-0.0004096	chr15	-	22272951	22273257	MSTRG.11967.1	1	307	MSTRG.11967	.	12.2964	1.83499	0	0	0	0	0	0	0	0	0	0
21585	u	novel	-1.13986	-0.0004096	chr15	-	22273899	22274294	MSTRG.11968.1	1	396	MSTRG.11968	.	0	0	0	0	0	0	0	0	0	0	9.82828	1.61551
21592	u	novel	-1.15274	-0.0004096	chr15	-	22292754	22294126	MSTRG.11971.1	1	1373	MSTRG.11971	.	0	0	0	0	0	0	0	0	0	0	5.80553	0.954276
21594	u	novel	-1.04862	-0.036864	chr15	-	22307985	22315924	MSTRG.11973.1	1	7940	MSTRG.11973	.	10.6465	1.58877	0	0	4.48367	0.589401	4.76778	0.963105	5.01902	0.623068	7.14005	1.17363
21595	u	novel	-1.06957	-0.0249856	chr15	-	22316692	22318069	MSTRG.11974.1	1	1378	MSTRG.11974	.	0	0	15.5189	1.72503	11.8483	1.55752	5.87808	1.18739	8.81495	1.0943	7.1357	1.17292
21609	u	novel	-1.06289	-0.0004096	chr15	+	22596498	22596819	MSTRG.11977.1	1	322	MSTRG.11977	.	0	0	0	0	0	0	1.39752	0.282302	0	0	11.7236	1.92705
21602	u	novel	-1.20112	-0.0004096	chr15	+	22417727	22418075	MSTRG.11983.1	1	349	MSTRG.11983	.	2.59599	0.387398	0.851003	0.094595	0.429799	0.056499	6.87106	1.38797	0	0	0	0
21603	u	novel	-1.07346	-0.0749568	chr15	+	22424114	22425168	MSTRG.11984.1	1	1055	MSTRG.11984	.	0	0	0	0	0	0	4.66351	0.942043	2.68815	0.333711	8.5763	1.40972
21604	u	novel	-1.28777	-0.0004096	chr15	+	22427341	22428145	MSTRG.11985.1	1	805	MSTRG.11985	.	0	0	0	0	0	0	0	0	0.372671	0.046264	0	0
21605	u	novel	-1.53272	-0.0004096	chr15	+	22433008	22433268	MSTRG.11986.1	1	261	MSTRG.11986	.	9.25671	1.38138	0	0	0	0	0	0	0	0	0	0
21610	u	novel	-1.1237	-0.0004096	chr15	-	22701528	22724520	MSTRG.11987.1	2	1153	MSTRG.11987	.	5.98621	0.893321	5.16415	0.57403	4.7771	0.627974	5.48288	1.10756	7.10715	0.882293	10.4735	1.72157
21611	u	novel	-1.35637	-0.0380928	chr15	+	22701785	22702005	MSTRG.11988.1	1	221	MSTRG.11988	.	0	0	0	0	0	0	4.0724	0.822637	2.44796	0.303894	22.2398	3.65564
21614	u	novel	-1.04716	-0.04096	chr15	+	22794291	22795457	MSTRG.11991.1	1	1167	MSTRG.11991	.	11.7515	1.75367	0	0	2.44216	0.321034	0	0	0	0	0	0
21631	u	novel	-1.48933	-0.024576	chr15	+	27100013	27100256	MSTRG.11993.1	1	244	MSTRG.11993	.	27.1516	4.05183	24.7623	2.7525	40.3279	5.3013	17.877	3.61122	8.57377	1.06436	13.9549	2.29382
21632	u	novel	-1.08624	-0.0004096	chr15	-	27164649	27165478	MSTRG.11994.1	1	830	MSTRG.11994	.	0	0	5.75274	0.639455	5.22892	0.687367	11.2386	2.27022	0	0	9.47229	1.55699
21628	i	novel	-1.15243	-0.0004096	chr15	-	26899642	26899991	MSTRG.11996.1	1	350	MSTRG.11996	CCDC93	0	0	0	0	0	0	0	0	0	0	10.2686	1.68788
21634	u	novel	-1.2805	-0.057344	chr15	+	27815602	27815842	MSTRG.11998.1	1	241	MSTRG.11998	.	8.77178	1.30901	1.24481	0.138369	4.35685	0.572729	13.6722	2.76183	9.92531	1.23214	12.4938	2.05364
21640	i	novel	-1.10163	-0.036864	chr15	-	28462424	28462706	MSTRG.12000.1	1	283	MSTRG.12000	STEAP3	25.5724	3.81616	27.6855	3.07743	32.8746	4.32152	38.576	7.79246	76.2262	9.46283	84.5477	13.8974
21645	u	novel	-1.20608	-0.073728	chr15	+	28587256	28588036	MSTRG.12001.1	1	781	MSTRG.12001	.	14.8054	2.2094	15.0653	1.67461	0	0	0	0	0	0	0	0
21646	u	novel	-1.10784	-0.0004096	chr15	+	28599414	28599725	MSTRG.12004.1	1	312	MSTRG.12004	.	5.80769	0.86668	0	0	8.53846	1.12242	0	0	0	0	0	0
21648	u	novel	-1.14461	-0.606208	chr15	-	28713904	28714223	MSTRG.12005.1	1	320	MSTRG.12005	.	2.83125	0.422506	2.8125	0.312628	16.8563	2.21584	4.21875	0.8522	2.8125	0.349148	3.30313	0.542946
21650	u	novel	-1.19736	-0.171213	chr15	+	28746941	28747185	MSTRG.12006.1	1	245	MSTRG.12006	.	0	0	0	0	10.4082	1.3682	0	0	0	0	0	0
21652	u	novel	-1.1386	-0.0561152	chr15	-	28761413	28766184	MSTRG.12010.1	2	4312	MSTRG.12010	.	0	0	0.09824	0.01092	0	0	0	0	0.105915	0.013148	6.7107	1.10306
21653	u	novel	-1.14332	-0.0561152	chr15	-	28761534	28766054	MSTRG.12010.2	1	4521	MSTRG.12010	.	8.34727	1.24566	0.678169	0.075383	0	0	5.96549	1.20505	0.671312	0.083338	0.284893	0.046829
21668	u	novel	-1.25319	-0.0454656	chr15	+	32650051	32650292	MSTRG.12013.1	1	242	MSTRG.12013	.	9.42218	1.40607	1.33058	0.147903	0	0	0.206612	0.041736	1.02686	0.127476	0.511708	0.084111
21671	u	novel	-1.01647	-0.0004096	chr15	-	34663797	34664078	MSTRG.12015.1	1	282	MSTRG.12015	.	4.28369	0.639253	6.84397	0.760754	0	0	1.06383	0.214897	0	0	10.5106	1.72767
21676	u	novel	-1.12074	-0.0045056	chr15	+	34695854	34698601	MSTRG.12020.1	1	2748	MSTRG.12020	.	10.8108	1.61329	0.506073	0.056253	6.34789	0.834461	0	0	0	0	0	0
21677	u	novel	-1.00508	-0.0528384	chr15	+	34699939	34700356	MSTRG.12021.1	1	418	MSTRG.12021	.	9.75359	1.45552	0	0	0	0	0	0	0	0	0	0
21714	u	novel	-1.05839	-0.118784	chr15	-	36233898	36234602	MSTRG.12034.1	1	705	MSTRG.12034	.	0	0	13.8525	1.5398	0	0	0	0	0	0	0	0
21720	u	novel	-1.34898	-0.012288	chr15	+	36457312	36459549	MSTRG.12038.1	1	2238	MSTRG.12038	.	0	0	0	0	4.71116	0.619306	5.46783	1.10452	0	0	10.2869	1.69089
2120	i	novel	-1.18309	-0.069632	chr1	-	126988326	126990501	MSTRG.1204.1	1	2176	MSTRG.1204	CH242-58J12.2	0	0	0	0	0	0	0	0	0	0	4.21737	0.693224
21731	u	novel	-1.24306	-0.0815104	chr15	-	37095820	37096060	MSTRG.12044.1	1	241	MSTRG.12044	.	6.26556	0.935007	15.0124	1.66874	4.35685	0.572729	1.24481	0.251456	3.60996	0.448146	7.46058	1.22632
21738	u	novel	-1.40411	-0.028672	chr15	+	37812219	37812488	MSTRG.12049.1	1	270	MSTRG.12049	.	117.204	17.4903	137.859	15.324	129.407	17.0112	102.859	20.7779	193.541	24.0264	152.77	25.1114
2121	i	novel	-1.07644	-0.0253952	chr1	-	126990818	126992146	MSTRG.1205.1	1	1329	MSTRG.1205	CH242-58J12.2	0	0	11.0612	1.22953	6.19812	0.814773	0	0	0	0	0	0
21750	u	novel	-1.1124	-0.012288	chr15	-	38557946	38559337	MSTRG.12050.1	1	1392	MSTRG.12050	.	0	0	17.0079	1.89054	0	0	10.5568	2.1325	0	0	13.5524	2.22766
21751	u	novel	-1.17598	-0.043008	chr15	+	38561360	38562454	MSTRG.12051.1	1	1095	MSTRG.12051	.	11.6338	1.73611	3.79448	0.421782	0	0	0	0	0	0	0	0
21752	u	novel	-1.12129	-0.0106496	chr15	-	38592475	38600345	MSTRG.12055.1	2	526	MSTRG.12055	.	7.44903	1.11162	8.34316	0.927399	13.9886	1.83887	6.59213	1.33163	6.62728	0.822721	6.22023	1.02244
21753	u	novel	-1.1881	-0.0004096	chr15	-	38617654	38617856	MSTRG.12056.1	1	203	MSTRG.12056	.	10.4138	1.55405	0	0	0	0	0.738916	0.149263	0	0	0	0
21754	u	novel	-1.00979	-0.012288	chr15	-	38633551	38634402	MSTRG.12057.1	1	852	MSTRG.12057	.	9.92488	1.48109	0	0	0	0	0	0	0	0	2.12676	0.349583
21755	u	novel	-1.14174	-0.02048	chr15	-	38644624	38645872	MSTRG.12058.1	1	1249	MSTRG.12058	.	11.9808	1.78789	0	0	5.58687	0.734421	2.07686	0.419532	0	0	2.29704	0.377572
21756	u	novel	-1.17222	-0.0004096	chr15	+	38697608	38698165	MSTRG.12059.1	1	558	MSTRG.12059	.	16.0412	2.39383	3.43369	0.381678	0	0	2.68817	0.543019	0	0	4.7957	0.788285
2122	i	novel	-1.37805	-0.0421888	chr1	-	126992461	126993300	MSTRG.1206.1	1	840	MSTRG.1206	CH242-58J12.2	4.63424	0.691566	0	0	0	0	5.88571	1.18893	4.45714	0.553316	0	0
21767	u	novel	-1.00058	-0.0335872	chr15	+	38813851	38816536	MSTRG.12064.1	1	2686	MSTRG.12064	.	5.81832	0.868265	0	0	0	0	0	0	11.4914	1.42656	0	0
21768	u	novel	-1.07221	-0.0004096	chr15	+	38824502	38824731	MSTRG.12065.1	1	230	MSTRG.12065	.	11.1609	1.66553	0	0	0	0	0	0	0	0	0	0
21760	u	novel	-1.29544	-0.18391	chr15	+	38782680	38783290	MSTRG.12068.1	1	611	MSTRG.12068	.	0	0	0	0	0	0	7.11457	1.43716	0	0	0	0
21761	u	novel	-1.28078	-0.0004096	chr15	+	38784081	38784695	MSTRG.12069.1	1	615	MSTRG.12069	.	0	0	0	0	0	0	0	0	10.9268	1.35647	5.40163	0.887884
2123	i	novel	-1.26317	-0.0004096	chr1	-	126995407	126997373	MSTRG.1207.1	1	1967	MSTRG.1207	CH242-58J12.2	14.6151	2.18101	0	0	0	0	0	0	7.0914	0.880338	0	0
21763	u	novel	-1.13432	-0.012288	chr15	+	38799648	38800622	MSTRG.12071.1	1	975	MSTRG.12071	.	5.15077	0.768647	0	0	0	0	6.45231	1.30339	17.2451	2.14084	5.84718	0.961121
21770	u	novel	-1.25624	-0.0004096	chr15	+	38990614	38991043	MSTRG.12073.1	1	430	MSTRG.12073	.	0	0	0	0	0.348837	0.045856	2.09302	0.422797	13.0814	1.62394	7.57674	1.24541
21771	u	novel	-1.03692	-0.0004096	chr15	+	39000183	39000389	MSTRG.12074.1	1	207	MSTRG.12074	.	10.942	1.63288	0	0	0	0	0	0	2.89855	0.35983	0.512077	0.084172
21772	u	novel	-1.09095	-0.0004096	chr15	+	39005730	39006153	MSTRG.12075.1	1	424	MSTRG.12075	.	10.191	1.5208	0	0	0	0	0	0	0	0	0	0
21773	u	novel	-1.05225	-0.0004096	chr15	+	39026835	39027108	MSTRG.12076.1	1	274	MSTRG.12076	.	0	0	0	0	0	0	6.56934	1.32703	0	0	1.65328	0.271756
21780	i	novel	-1.29563	-0.02048	chr15	+	42702594	42703488	MSTRG.12079.1	1	895	MSTRG.12079	ANGPT2	12.4715	1.86112	0	0	5.85587	0.769782	1.50838	0.304697	0	0	0	0
21781	i	novel	-1.31301	-0.0004096	chr15	+	42705622	42706030	MSTRG.12080.1	1	409	MSTRG.12080	ANGPT2	9.22249	1.37627	0	0	5.41809	0.712235	0.366748	0.074084	4.01956	0.498994	1.89242	0.311064
21782	i	novel	-1.15484	-0.049152	chr15	+	42709808	42710255	MSTRG.12081.1	1	448	MSTRG.12081	ANGPT2	9.09375	1.35706	0	0	0	0	0	0	2.67857	0.332522	0	0
21786	u	novel	-1.16143	-0.0004096	chr15	+	42809940	42810240	MSTRG.12084.1	1	301	MSTRG.12084	.	10.0332	1.49725	0	0	0	0	0	0	0	0	0	0
21788	u	novel	-1.02184	-0.0323584	chr15	-	43009920	43013323	MSTRG.12086.1	1	3404	MSTRG.12086	.	13.8672	2.0694	0	0	0	0	5.24089	1.05868	5.23869	0.650339	6.7312	1.10643
2126	i	novel	-1.10576	-0.0004096	chr1	-	127039421	127039676	MSTRG.1209.1	1	256	MSTRG.1209	CH242-58J12.2	0	0	0	0	0	0	0	0	0	0	8.25781	1.35736
21818	u	novel	-1.42601	-0.0004096	chr15	+	44818973	44819363	MSTRG.12097.1	1	391	MSTRG.12097	.	11.5857	1.72893	0	0	0	0	0	0	0	0	0	0
21819	u	novel	-1.14586	-0.14336	chr15	+	44819980	44821105	MSTRG.12098.1	1	1126	MSTRG.12098	.	10.7291	1.6011	6.19716	0.688856	0	0	0	0	3.73357	0.463491	1.60924	0.264516
21820	u	novel	-1.19524	-0.0004096	chr15	+	44822688	44823008	MSTRG.12099.1	1	321	MSTRG.12099	.	10.7632	1.60619	0	0	14.9439	1.96445	0	0	9.33645	1.15904	3.76324	0.618577
2127	i	novel	-1.33522	-0.0004096	chr1	-	127041184	127041494	MSTRG.1210.1	1	311	MSTRG.1210	CH242-58J12.2	9.71061	1.44911	0	0	0	0	0	0	0	0	0	0
21821	u	novel	-1.02591	-0.0004096	chr15	+	44823537	44824237	MSTRG.12100.1	1	701	MSTRG.12100	.	7.10842	1.06079	0	0	0	0	0	0	2.1398	0.265638	0	0
21823	u	novel	-1.10289	-0.152371	chr15	+	44830238	44830831	MSTRG.12102.1	1	594	MSTRG.12102	.	8.58249	1.28076	0	0	0	0	0	0	0	0	0	0
21827	u	novel	-1.06518	-0.126976	chr15	+	47350829	47351062	MSTRG.12104.1	1	234	MSTRG.12104	.	5.79487	0.864766	19.1197	2.12528	12.7265	1.67296	3.84615	0.776935	8.71795	1.08226	7.74359	1.27284
21826	i	novel	-1.16414	-0.0004096	chr15	-	45615576	45615801	MSTRG.12106.1	1	226	MSTRG.12106	AGA	13.3628	1.99413	0	0	0	0	0	0	0	0	0	0
21859	u	novel	-1.03014	-0.0151552	chr15	+	51424600	51424948	MSTRG.12108.1	1	349	MSTRG.12108	.	9.51862	1.42046	14.149	1.57276	11.6046	1.52548	9.31805	1.88227	19.8453	2.46362	16.8166	2.76421
21864	u	novel	-1.09627	-0.06144	chr15	-	51507871	51508140	MSTRG.12109.1	1	270	MSTRG.12109	.	2.22593	0.332174	3.87778	0.431041	0	0	0	0	0	0	8.27037	1.35943
2128	i	novel	-1.05526	-0.0004096	chr1	-	127048328	127048637	MSTRG.1211.1	1	310	MSTRG.1211	CH242-58J12.2	11.6903	1.74454	0	0	0	0	0	0	0	0	0	0
21867	u	novel	-1.26765	-0.024576	chr15	-	51587772	51589722	MSTRG.12113.1	1	1951	MSTRG.12113	.	35.3993	5.28262	28.632	3.18264	25.8375	3.39647	21.9698	4.43796	42.8042	5.31378	30.4126	4.99902
21841	i	novel	-1.12075	-0.032768	chr15	+	51255148	51264203	MSTRG.12118.1	1	9056	MSTRG.12118	WWC2	4.8337	0.721331	6.39521	0.71087	11.8891	1.56289	0	0	3.76125	0.466927	7.12721	1.17152
21842	i	novel	-1.0785	-0.0421888	chr15	+	51265498	51266066	MSTRG.12119.1	1	569	MSTRG.12119	WWC2	8.95606	1.33651	0	0	0	0	8.17223	1.65082	0	0	3.74111	0.614939
2129	i	novel	-1.22828	-0.057344	chr1	-	127053360	127053694	MSTRG.1212.1	1	335	MSTRG.1212	CH242-58J12.2	0	0	0	0	0	0	0	0	0	0	9.01492	1.48181
21844	i	novel	-1.14055	-0.032768	chr15	+	51271276	51272404	MSTRG.12121.1	1	1129	MSTRG.12121	WWC2	0	0	11.5049	1.27884	4.09743	0.538627	3.31798	0.670242	0	0	3.74136	0.614981
21845	i	novel	-1.31705	-0.094208	chr15	+	51275419	51278695	MSTRG.12122.1	1	3277	MSTRG.12122	WWC2	9.05127	1.35072	11.7458	1.30563	0	0	3.22551	0.651563	6.38701	0.792894	5.69118	0.935479
21846	i	novel	-1.05889	-0.0524288	chr15	+	51281586	51284779	MSTRG.12123.1	1	3194	MSTRG.12123	WWC2	9.50939	1.41908	0	0	6.44427	0.847131	1.67666	0.33869	0	0	0	0
21848	i	novel	-1.1532	-0.0892928	chr15	+	51296470	51296947	MSTRG.12125.1	1	478	MSTRG.12125	WWC2	9.14854	1.36523	0	0	0	0	0	0	0	0	0	0
21850	i	novel	-1.15176	-0.045056	chr15	+	51311122	51311609	MSTRG.12127.1	1	488	MSTRG.12127	WWC2	10.5205	1.56997	0	0	0	0	3.375	0.68176	0	0	3.63525	0.597538
21851	i	novel	-1.34285	-0.077824	chr15	+	51316608	51316826	MSTRG.12128.1	1	219	MSTRG.12128	WWC2	10.3425	1.5434	0	0	0	0	0	0	0	0	0	0
21852	i	novel	-1.23397	-0.04096	chr15	+	51317133	51319505	MSTRG.12129.1	1	2373	MSTRG.12129	WWC2	10.3228	1.54047	10.8719	1.20848	10.4716	1.37654	3.43616	0.694114	6.68816	0.830278	7.05183	1.15913
2130	i	novel	-1.24224	-0.0831488	chr1	-	127061463	127063322	MSTRG.1213.1	1	1860	MSTRG.1213	CH242-58J12.2	9.31183	1.3896	0	0	0	0	0	0	0	0	0	0
21853	i	novel	-1.00733	-0.0114688	chr15	+	51321714	51325084	MSTRG.12130.1	1	3371	MSTRG.12130	WWC2	8.64017	1.28937	4.71943	0.524596	0	0	2.46722	0.498386	0	0	0	0
21857	u	novel	-1.14155	-0.0004096	chr15	+	51418620	51418997	MSTRG.12132.1	1	378	MSTRG.12132	.	9.5873	1.43071	1.19048	0.132329	0	0	0	0	0	0	0	0
21874	u	novel	-1.02696	-0.012288	chr15	-	51696080	51697966	MSTRG.12137.1	1	1887	MSTRG.12137	.	10.5909	1.58047	0	0	0	0	0	0	0	0	0	0
21878	u	novel	-1.04341	-0.151552	chr15	+	51704240	51705504	MSTRG.12141.1	1	1265	MSTRG.12141	.	10.1138	1.50928	12.2285	1.35928	0	0	3.46719	0.700384	4.46798	0.554662	4.65534	0.765213
21879	u	novel	-1.21115	-0.0024576	chr15	+	51706485	51708549	MSTRG.12142.1	1	2065	MSTRG.12142	.	15.1564	2.26179	24.3535	2.70706	13.4746	1.7713	6.95303	1.40453	7.7322	0.959887	11.9027	1.95648
21880	u	novel	-1.19699	-0.0708608	chr15	+	51732461	51733975	MSTRG.12143.1	1	1515	MSTRG.12143	.	9.2363	1.37833	0	0	3.45941	0.454756	0	0	0	0	0.59802	0.098299
21882	u	novel	-1.27082	-0.034816	chr15	+	51749709	51749996	MSTRG.12144.1	1	288	MSTRG.12144	.	0	0	0	0	0	0	0	0	0	0	10.0556	1.65287
21883	u	novel	-1.25088	-0.0004096	chr15	+	51754753	51755169	MSTRG.12145.1	1	417	MSTRG.12145	.	0	0	0	0	0	0	8.56595	1.73035	0	0	0	0
21884	u	novel	-1.35181	-0.0282624	chr15	+	51757131	51757553	MSTRG.12146.1	1	423	MSTRG.12146	.	0	0	0	0	0	0	0	0	0	0	8.47991	1.39387
21885	u	novel	-1.26116	-0.057344	chr15	+	51771451	51771897	MSTRG.12147.1	1	447	MSTRG.12147	.	10.8098	1.61315	0	0	7.12668	0.936837	0	0	0	0	0	0
21886	u	novel	-1.48698	-0.0004096	chr15	+	51792173	51792398	MSTRG.12148.1	1	226	MSTRG.12148	.	0	0	0	0	0	0	6.63717	1.34073	0	0	0	0
21887	u	novel	-1.15908	-0.0004096	chr15	+	51797571	51797912	MSTRG.12149.1	1	342	MSTRG.12149	.	0	0	0	0	0	0	6.57895	1.32897	0	0	0	0
2132	i	novel	-1.11966	-0.036864	chr1	-	127066102	127066777	MSTRG.1215.1	1	676	MSTRG.1215	CH242-58J12.2	8.26479	1.23335	0	0	15.2663	2.00683	0	0	0	0	0	0
21900	u	novel	-1.17991	-0.045056	chr15	+	52038860	52039668	MSTRG.12154.1	1	809	MSTRG.12154	.	0	0	0	0	10.6156	1.39547	3.52287	0.71163	6.23733	0.774312	0	0
21911	u	novel	-1.03168	-0.0004096	chr15	-	52272795	52273024	MSTRG.12159.1	1	230	MSTRG.12159	.	0	0	9.78261	1.0874	13.0435	1.71463	0	0	5.21739	0.647695	3.8	0.624619
2133	i	novel	-1.09697	-0.0004096	chr1	-	127067609	127067876	MSTRG.1216.1	1	268	MSTRG.1216	CH242-58J12.2	13.6493	2.03687	0	0	0	0	0	0	0	0	0	0
21906	i	novel	-1.27674	-0.0004096	chr15	-	52219825	52220103	MSTRG.12161.1	1	279	MSTRG.12161	IRF2	0	0	0	0	4.30107	0.565397	0	0	15.0538	1.8688	0	0
21907	i	novel	-1.35213	-0.0004096	chr15	-	52221467	52221723	MSTRG.12162.1	1	257	MSTRG.12162	IRF2	11.751	1.75359	0	0	0	0	0	0	3.50195	0.434737	3.52529	0.579464
21908	i	novel	-1.27008	-0.151552	chr15	-	52222266	52222689	MSTRG.12163.1	1	424	MSTRG.12163	IRF2	13.5189	2.01742	0	0	0	0	0	0	0	0	0	0
21910	i	novel	-1.29083	-0.139264	chr15	-	52229510	52230980	MSTRG.12165.1	1	1471	MSTRG.12165	IRF2	9.54657	1.42463	0	0	0	0	0	0	0	0	0	0
2134	i	novel	-1.15144	-0.0978944	chr1	-	127068547	127069925	MSTRG.1217.1	1	1379	MSTRG.1217	CH242-58J12.2	0	0	1.03776	0.115354	0	0	0	0	0	0	0	0
21922	u	novel	-1.25028	-0.0192512	chr15	-	52902443	52902685	MSTRG.12171.1	1	243	MSTRG.12171	.	5.58025	0.832738	15.0864	1.67696	7.37448	0.969412	6.14815	1.24195	0	0	6.76543	1.11206
21924	x	novel	-1.25783	-0.0053248	chr15	-	52926864	52928142	MSTRG.12173.1	1	1279	MSTRG.12173	SLC25A4	10.025	1.49603	0	0	4.92572	0.64751	0	0	0	0	0	0
2135	i	novel	-1.33826	-0.105677	chr1	-	127070323	127071239	MSTRG.1218.1	1	917	MSTRG.1218	CH242-58J12.2	9.76227	1.45682	0	0	5.80126	0.762604	0	0	0	0	0	0
21943	u	novel	-1.26539	-0.0004096	chr15	+	53353612	53354118	MSTRG.12183.1	1	507	MSTRG.12183	.	13.1045	1.95558	0	0	0	0	0	0	0	0	0	0
21963	u	novel	-1.06886	-0.0004096	chr15	+	53662774	53663008	MSTRG.12184.1	1	235	MSTRG.12184	.	14.7106	2.19526	0	0	0	0	0	0	0	0	5.78298	0.950568
21970	u	novel	-1.04068	-0.008192	chr15	+	53682037	53682373	MSTRG.12188.1	1	337	MSTRG.12188	.	0	0	0	0	10.2374	1.34576	0	0	0	0	0	0
21967	u	novel	-1.00931	-0.02048	chr15	+	53676554	53677780	MSTRG.12189.1	1	1227	MSTRG.12189	.	8.84923	1.32057	12.7009	1.41179	5.86552	0.771052	4.84841	0.979394	6.2282	0.773178	7.86308	1.29248
21968	u	novel	-1.37193	-0.0004096	chr15	+	53679006	53679549	MSTRG.12190.1	1	544	MSTRG.12190	.	9.57537	1.42893	0	0	0	0	0	0	0	0	0	0
21972	u	novel	-1.20444	-0.0004096	chr15	+	53685985	53686400	MSTRG.12193.1	1	416	MSTRG.12193	.	9.07452	1.35419	0	0	0	0	0	0	0	0	11.2139	1.84327
21973	u	novel	-1.21117	-0.0004096	chr15	+	53686986	53687336	MSTRG.12194.1	1	351	MSTRG.12194	.	9.89459	1.47656	0	0	0	0	0	0	0	0	0	0
21980	u	novel	-1.11219	-0.045056	chr15	-	53832425	53833101	MSTRG.12197.1	1	677	MSTRG.12197	.	0	0	0	0	0.886263	0.116504	0	0	0	0	8.25258	1.35651
2137	i	novel	-1.02805	-0.110592	chr1	-	127075096	127075993	MSTRG.1220.1	1	898	MSTRG.1220	CH242-58J12.2	11.9187	1.77862	0	0	7.98998	1.05032	1.16926	0.236195	0	0	0	0
21950	u	novel	-1.18614	-0.0004096	chr15	-	53478582	53479278	MSTRG.12201.1	1	697	MSTRG.12201	.	9.099	1.35784	0	0	3.01291	0.396062	0	0	2.15208	0.267162	0	0
21951	u	novel	-1.09803	-0.0528384	chr15	-	53482368	53482817	MSTRG.12202.1	1	450	MSTRG.12202	.	11.0667	1.65147	0	0	0	0	0	0	0	0	3.69111	0.606721
21952	u	novel	-1.1793	-0.028672	chr15	-	53487001	53488864	MSTRG.12203.1	1	1864	MSTRG.12203	.	7.68938	1.14748	0	0	0	0	0	0	0	0	0.324034	0.053263
21953	u	novel	-1.0122	-0.02048	chr15	-	53490170	53491123	MSTRG.12204.1	1	954	MSTRG.12204	.	9.02516	1.34682	10.6143	1.17985	0	0	1.88365	0.380503	0	0	2.2652	0.372338
21954	u	novel	-1.17366	-0.0004096	chr15	-	53497636	53497862	MSTRG.12205.1	1	227	MSTRG.12205	.	0	0	0	0	0	0	6.60793	1.33482	0	0	0	0
21955	u	novel	-1.26821	-0.049152	chr15	-	53500458	53501749	MSTRG.12206.1	1	1292	MSTRG.12206	.	10.1656	1.51701	0	0	0	0	0	0	0	0	3.27245	0.537903
21956	u	novel	-1.14269	-0.032768	chr15	-	53502629	53504158	MSTRG.12207.1	1	1530	MSTRG.12207	.	12.7255	1.89902	7.39404	0.821897	0	0	1.15425	0.233162	3.62353	0.44983	0	0
21957	u	novel	-1.26113	-0.139264	chr15	-	53506700	53510122	MSTRG.12208.1	1	3423	MSTRG.12208	.	12.4405	1.8565	6.26979	0.696929	4.88875	0.64265	0	0	0	0	0	0
21958	u	novel	-1.01869	-0.0065536	chr15	-	53510906	53513261	MSTRG.12209.1	1	2356	MSTRG.12209	.	9.60993	1.43409	0	0	0	0	2.86503	0.578744	1.08107	0.134206	4.23727	0.696494
2138	i	novel	-1.45362	-0.0282624	chr1	-	127076989	127077213	MSTRG.1221.1	1	225	MSTRG.1221	CH242-58J12.2	12.08	1.80269	0	0	0	0	0	0	0	0	0	0
21959	u	novel	-1.24792	-0.077824	chr15	-	53513654	53514800	MSTRG.12210.1	1	1147	MSTRG.12210	.	11.0235	1.64504	0	0	0	0	0	0	0	0	1.97036	0.323874
21961	u	novel	-1.05296	-0.0385024	chr15	-	53540489	53584819	MSTRG.12211.2	3	4224	MSTRG.12211	.	17.6803	2.63842	16.8148	1.86908	8.88205	1.16759	1.65953	0.33523	4.02891	0.500155	5.68298	0.934131
21962	u	novel	-1.1572	-0.0004096	chr15	-	53570645	53571986	MSTRG.12212.1	2	1028	MSTRG.12212	.	9.69163	1.44628	12.566	1.39679	1.42845	0.187777	1.60506	0.324227	3.3045	0.410226	4.02934	0.662316
22000	u	novel	-1.19028	-0.0036864	chr15	-	54592641	54594883	MSTRG.12215.1	1	2243	MSTRG.12215	.	12.7488	1.9025	11.1284	1.237	8.18101	1.07543	0	0	0	0	10.5114	1.72779
21998	i	novel	-1.4082	-0.098304	chr15	+	54551940	54552201	MSTRG.12217.1	1	262	MSTRG.12217	ADAM32	7.47805	1.11595	13.9686	1.5527	16.0429	2.10892	7.98855	1.61371	13.1221	1.629	11.2732	1.85302
22008	u	novel	-1.09945	-0.098304	chr15	+	54707302	54707589	MSTRG.12219.1	1	288	MSTRG.12219	.	1.57292	0.234726	9.8125	1.09073	0	0	9.3125	1.88115	0	0	7.86458	1.29273
2139	i	novel	-1.0265	-0.0004096	chr1	-	127077857	127078173	MSTRG.1222.1	1	317	MSTRG.1222	CH242-58J12.2	0	0	0	0	0	0	0	0	0	0	8.57413	1.40936
22011	u	novel	-1.05324	-0.04096	chr15	-	54769404	54770702	MSTRG.12225.1	1	1299	MSTRG.12225	.	39.8959	5.95365	48.9307	5.43898	0	0	23.3818	4.7232	39.8868	4.95161	31.3487	5.1529
22020	u	novel	-1.33363	-0.121651	chr15	-	55010260	55010476	MSTRG.12232.1	1	217	MSTRG.12232	.	13.2212	1.97299	3.45622	0.384182	0	0	0	0	0	0	0	0
2141	i	novel	-1.15661	-0.0270336	chr1	-	127079812	127081368	MSTRG.1224.1	1	1557	MSTRG.1224	CH242-58J12.2	14.9332	2.22848	0	0	0	0	0	0	0	0	0	0
22063	x	novel	-1.23545	-0.221184	chr15	-	55509850	55511835	MSTRG.12244.1	1	1986	MSTRG.12244	STAR	0	0	18.4396	2.04968	17.7341	2.33124	7.76586	1.56873	9.88268	1.22685	8.3993	1.38062
22067	u	novel	-1.26401	-0.090112	chr15	-	55554349	55555450	MSTRG.12247.1	1	1102	MSTRG.12247	.	0	0	0	0	0	0	0	0	12.3358	1.53138	0	0
2142	i	novel	-1.34187	-0.016384	chr1	-	127084564	127085779	MSTRG.1225.1	1	1216	MSTRG.1225	CH242-58J12.2	11.3002	1.68632	0	0	0	0	0	0	0	0	0	0
2143	i	novel	-1.04644	-0.0004096	chr1	-	127086251	127086651	MSTRG.1226.1	1	401	MSTRG.1226	CH242-58J12.2	0	0	0	0	0	0	7.00249	1.41453	0	0	0	0
22092	u	novel	-1.4164	-0.0937984	chr15	-	57819151	57819412	MSTRG.12261.1	1	262	MSTRG.12261	.	13.8321	2.06415	27.2812	3.03249	13.7061	1.80174	10.271	2.07477	18.7824	2.33168	10.3588	1.70271
22094	u	novel	-1.37182	-0.024576	chr15	-	59459763	59460115	MSTRG.12262.1	1	353	MSTRG.12262	.	0	0	4.24079	0.471393	0	0	6.79037	1.37167	0	0	2.56657	0.421876
22095	u	novel	-1.24099	-0.0004096	chr15	-	59469502	59469780	MSTRG.12263.1	1	279	MSTRG.12263	.	10.8244	1.61532	0	0	5.37634	0.706747	5.91398	1.19464	0	0	0	0
22111	u	novel	-1.25396	-0.0253952	chr15	+	59568186	59569193	MSTRG.12269.1	1	1008	MSTRG.12269	.	9.38294	1.40021	0	0	0	0	0	0	0	0	0	0
22120	u	novel	-1.27345	-0.028672	chr15	+	59730863	59731095	MSTRG.12273.1	1	233	MSTRG.12273	.	18.7382	2.79629	24.7082	2.74648	8.25751	1.08549	11.0472	2.23157	17.7167	2.19938	10.0515	1.6522
22115	o	novel	-1.18222	-0.114688	chr15	-	59631661	59683791	MSTRG.12278.1	4	6554	MSTRG.12278	U6	10.1545	1.51535	9.08974	1.01039	4.4422	0.583949	15.4019	3.11123	21.842	2.7115	25.2494	4.15033
22116	u	novel	-1.00318	-0.06144	chr15	-	59631680	59680050	MSTRG.12278.2	4	5668	MSTRG.12278	.	2.47773	0.36975	4.74099	0.526993	4.21835	0.554522	3.58333	0.723844	9.81639	1.21862	4.94295	0.812489
22117	o	novel	-1.1627	-0.0401408	chr15	-	59632101	59683754	MSTRG.12278.3	5	3860	MSTRG.12278	U6	2.51913	0.375929	1.15862	0.128788	0.74902	0.098462	0	0	0	0	0	0
22147	u	novel	-1.00327	-0.147866	chr15	-	60176184	60176998	MSTRG.12281.1	1	815	MSTRG.12281	.	9.07853	1.35478	0	0	0	0	0	0	0	0	2.22331	0.365454
22123	i	novel	-1.26962	-0.0004096	chr15	+	59929467	59930002	MSTRG.12283.1	1	536	MSTRG.12283	ENSSSCG00000025008	9.29664	1.38733	0	0	1.95896	0.257514	0.559702	0.113061	0	0	0.563433	0.092613
22125	i	novel	-1.45673	-0.0004096	chr15	-	59945115	59945502	MSTRG.12285.1	1	388	MSTRG.12285	ENSSSCG00000025008	9.72938	1.45191	0	0	0	0	0	0	1.10359	0.137001	0	0
22126	i	novel	-1.21512	-0.049152	chr15	-	59947063	59947906	MSTRG.12286.1	1	844	MSTRG.12286	ENSSSCG00000025008	10.5557	1.57522	0	0	0	0	1.24408	0.251307	0	0	0	0
22128	i	novel	-1.43626	-0.0004096	chr15	-	59951887	59952134	MSTRG.12288.1	1	248	MSTRG.12288	ENSSSCG00000025008	0	0	0	0	0	0	4.83871	0.977434	10.8871	1.35154	0	0
2146	i	novel	-1.1081	-0.086016	chr1	-	127102271	127109438	MSTRG.1229.1	1	7168	MSTRG.1229	CH242-58J12.2	0	0	1.12082	0.124587	0	0	3.14076	0.634444	0	0	5.53292	0.909466
22131	i	novel	-1.00723	-0.073728	chr15	-	59963369	59963844	MSTRG.12290.1	1	476	MSTRG.12290	ENSSSCG00000025008	17.5651	2.62124	0	0	0	0	5.96218	1.20438	0	0	0.634454	0.104287
22132	i	novel	-1.02451	-0.139264	chr15	-	59965081	59966673	MSTRG.12291.1	1	1593	MSTRG.12291	ENSSSCG00000025008	11.8487	1.76818	0	0	10.968	1.44179	0	0	0	0	7.97866	1.31148
22134	i	novel	-1.20991	-0.0004096	chr15	-	59998632	59998991	MSTRG.12293.1	1	360	MSTRG.12293	ENSSSCG00000025008	11.7444	1.75262	2.08333	0.231576	0	0	0	0	0	0	0	0
22135	i	novel	-1.06291	-0.0004096	chr15	-	60007980	60008520	MSTRG.12294.1	1	541	MSTRG.12294	ENSSSCG00000025008	9.03697	1.34858	0	0	0	0	1.62847	0.328955	0	0	2.50647	0.411997
22136	i	novel	-1.12049	-0.0004096	chr15	-	60010574	60010813	MSTRG.12295.1	1	240	MSTRG.12295	ENSSSCG00000025008	10.6458	1.58867	0	0	0	0	0	0	0	0	1.25833	0.206836
22137	i	novel	-1.29902	-0.0004096	chr15	+	60015009	60015643	MSTRG.12296.1	1	635	MSTRG.12296	ENSSSCG00000025008	10.4268	1.55598	0	0	0	0	0	0	0	0	0	0
22138	i	novel	-1.27716	-0.0004096	chr15	-	60029286	60029837	MSTRG.12297.1	1	552	MSTRG.12297	ENSSSCG00000025008	9.02717	1.34712	0	0	0	0	2.71739	0.548921	0	0	1.6413	0.269787
22139	i	novel	-1.1487	-0.0004096	chr15	-	60035509	60036682	MSTRG.12298.1	1	1174	MSTRG.12298	ENSSSCG00000025008	11.9489	1.78313	7.6184	0.846836	8.01192	1.05321	0	0	0	0	3.2155	0.528543
22140	u	novel	-1.10001	-0.032768	chr15	-	60045184	60047883	MSTRG.12299.1	1	2700	MSTRG.12299	.	10.8081	1.6129	0	0	0	0	0	0	0	0	0	0
22141	u	novel	-1.00455	-0.0024576	chr15	-	60050705	60051632	MSTRG.12300.1	1	928	MSTRG.12300	.	9.31358	1.38986	0	0	0	0	0	0	0	0	0	0
22142	u	novel	-1.11464	-0.217088	chr15	-	60054143	60056007	MSTRG.12301.1	1	1865	MSTRG.12301	.	9.95871	1.48613	0	0	0	0	0	0	0	0	0	0
22143	u	novel	-1.20615	-0.053248	chr15	+	60058439	60059127	MSTRG.12302.1	1	689	MSTRG.12302	.	9.99855	1.49208	0	0	0	0	0	0	0	0	0.657475	0.108071
22148	u	novel	-1.29927	-0.0004096	chr15	-	60191922	60192352	MSTRG.12303.1	1	431	MSTRG.12303	.	11.2111	1.67303	0	0	0	0	0	0	0	0	0	0
22149	u	novel	-1.21205	-0.0659456	chr15	-	60192655	60198513	MSTRG.12304.1	1	5859	MSTRG.12304	.	12.0922	1.80451	14.5643	1.61892	12.2345	1.60829	6.10394	1.23301	9.64567	1.19743	5.31388	0.87346
22182	u	novel	-1.23754	-0.114688	chr15	-	62237171	62237571	MSTRG.12310.1	1	401	MSTRG.12310	.	10.9202	1.62962	0	0	9.71072	1.27652	2.61845	0.528936	0	0	5.9947	0.98537
22188	u	novel	-1.27823	-0.032768	chr15	-	62275237	62275702	MSTRG.12314.1	1	466	MSTRG.12314	.	0	0	0	0	14.1567	1.86096	0	0	7.71888	0.958234	0	0
22194	u	novel	-1.53363	-0.024576	chr15	+	62817431	62817671	MSTRG.12317.1	1	241	MSTRG.12317	.	2.48133	0.370288	9.73859	1.08251	9.94606	1.30746	6.19917	1.25225	0	0	8.51591	1.39979
2150	i	novel	-1.25462	-0.0004096	chr1	-	127141036	127141403	MSTRG.1232.1	1	368	MSTRG.1232	CH242-58J12.2	0	0	0	0	0	0	0	0	0	0	12.7038	2.08817
22175	u	novel	-1.09428	-0.0385024	chr15	+	61931374	61932573	MSTRG.12325.1	1	1200	MSTRG.12325	.	10.57	1.57736	0	0	0	0	0	0	5.34112	0.663055	5.03333	0.827346
2151	i	novel	-1.30373	-0.0475136	chr1	-	127143387	127145194	MSTRG.1233.1	1	1808	MSTRG.1233	CH242-58J12.2	0	0	0	0	8.94469	1.17582	7.38496	1.49178	6.88108	0.854228	6.76327	1.1117
22200	u	novel	-1.14113	-0.069632	chr15	-	63524178	63524730	MSTRG.12330.1	1	553	MSTRG.12330	.	9.53888	1.42348	0	0	0	0	0	0	0	0	0	0
22202	u	novel	-1.09736	-0.0004096	chr15	-	63595692	63595896	MSTRG.12332.1	1	205	MSTRG.12332	.	11.7854	1.75873	10.2439	1.13868	4.37073	0.574554	4.39024	0.886843	0	0	2.94634	0.4843
22203	u	novel	-1.16903	-0.0303104	chr15	-	63608900	63610603	MSTRG.12333.1	1	1704	MSTRG.12333	.	9.19014	1.37144	0	0	0	0	0	0	0	0	0	0
22204	u	novel	-1.29454	-0.0004096	chr15	-	63613589	63614068	MSTRG.12334.1	1	480	MSTRG.12334	.	0	0	0	0	0	0	0	0	0	0	5.6625	0.930764
22207	u	novel	-1.32308	-0.0004096	chr15	-	63627816	63628897	MSTRG.12337.1	1	1082	MSTRG.12337	.	9.42329	1.40623	4.02033	0.446887	5.53789	0.727983	4.57209	0.923576	7.47874	0.928422	5.4427	0.894635
22208	u	novel	-1.42083	-0.0004096	chr15	+	63690048	63690653	MSTRG.12338.1	1	606	MSTRG.12338	.	7.43564	1.10962	0	0	0	0	0	0	0	0	0	0
22209	u	novel	-1.10004	-0.0581632	chr15	+	63695060	63695310	MSTRG.12339.1	1	251	MSTRG.12339	.	0	0	0	0	4.18327	0.549911	0	0	0	0	8.42231	1.3844
2152	i	novel	-1.26313	-0.0004096	chr1	-	127151272	127151937	MSTRG.1234.1	1	666	MSTRG.1234	CH242-58J12.2	12.47	1.86089	0	0	0	0	5.63063	1.1374	0	0	0	0
22210	u	novel	-1.22094	-0.036864	chr15	+	63698116	63698491	MSTRG.12340.1	1	376	MSTRG.12340	.	9.2367	1.37839	4.7633	0.529473	0	0	0	0	0	0	0	0
22212	u	novel	-1.37289	-0.0004096	chr15	+	63701843	63702117	MSTRG.12342.1	1	275	MSTRG.12342	.	9.82545	1.46625	0	0	0	0	0	0	0	0	0	0
22213	u	novel	-1.02119	-0.0004096	chr15	+	63708795	63709071	MSTRG.12343.1	1	277	MSTRG.12343	.	0	0	0	0	0	0	0	0	0	0	8.72202	1.43367
22214	u	novel	-1.006	-0.086016	chr15	-	63711884	63714381	MSTRG.12344.1	1	2498	MSTRG.12344	.	17.8339	2.66134	20.0893	2.23306	17.4552	2.29457	13.2186	2.67019	21.0653	2.61507	12.7462	2.09514
2153	i	novel	-1.3334	-0.0004096	chr1	-	127154168	127154756	MSTRG.1235.1	1	589	MSTRG.1235	CH242-58J12.2	10.7623	1.60606	0	0	0	0	3.04075	0.61424	0	0	0	0
22233	u	novel	-1.12923	-0.0004096	chr15	-	65322072	65322324	MSTRG.12352.1	1	253	MSTRG.12352	.	1.19368	0.178132	0	0	2.37154	0.311751	9.48617	1.91623	0	0	3.58103	0.588626
22236	u	novel	-1.01459	-0.0114688	chr15	-	65587479	65588229	MSTRG.12353.1	1	751	MSTRG.12353	.	9.16911	1.3683	11.6851	1.29888	0	0	6.88882	1.39156	11.0672	1.3739	1.30976	0.215289
22234	u	novel	-1.04047	-0.0004096	chr15	-	65356316	65364773	MSTRG.12355.1	2	202	MSTRG.12355	.	0	0	25.2718	2.80912	46.9347	6.16979	13.6666	2.76069	562.447	69.823	442.827	72.789
22238	u	novel	-1.21549	-0.016384	chr15	-	65613048	65613824	MSTRG.12357.1	1	777	MSTRG.12357	.	0	0	13.4125	1.49089	7.61519	1.00105	1.83398	0.370469	0	0	4.45302	0.731959
2154	i	novel	-1.23333	-0.036864	chr1	-	127159084	127160467	MSTRG.1236.1	1	1384	MSTRG.1236	CH242-58J12.2	12.8663	1.92004	0	0	2.821	0.370834	0	0	2.08643	0.259013	1.8526	0.304518
2155	i	novel	-1.21263	-0.0004096	chr1	-	127166834	127167099	MSTRG.1237.1	1	266	MSTRG.1237	CH242-58J12.2	9.08271	1.35541	0	0	0	0	0	0	0	0	0	0
22263	u	novel	-1.22183	-0.0004096	chr15	-	66204789	66205037	MSTRG.12371.1	1	249	MSTRG.12371	.	7.27711	1.08596	0	0	0	0	6.62651	1.33857	2.40964	0.299136	0	0
22273	u	novel	-1.06377	-0.026624	chr15	-	66253439	66254354	MSTRG.12375.1	1	916	MSTRG.12375	.	0	0	0	0	0	0	4.36245	0.881227	0	0	0	0
22275	u	novel	-1.11163	-0.0208896	chr15	-	66263593	66266275	MSTRG.12378.1	1	2683	MSTRG.12378	.	8.70853	1.29957	11.6295	1.2927	0	0	4.84681	0.979071	6.40216	0.794774	6.09281	1.0015
22305	u	novel	-1.155	-0.0229376	chr15	-	69552629	69552867	MSTRG.12385.1	1	239	MSTRG.12385	.	7.58159	1.1314	20.3431	2.26127	12.5523	1.65006	5.64854	1.14102	8.78661	1.09078	8.84519	1.45391
22309	u	novel	-1.27114	-0.139674	chr15	+	70711657	70711892	MSTRG.12386.1	1	236	MSTRG.12386	.	0	0	0	0	0	0	0	0	13.3093	1.65224	0	0
22310	u	novel	-1.38374	-0.13312	chr15	+	70746820	70747024	MSTRG.12387.1	1	205	MSTRG.12387	.	9.57561	1.42897	2.80976	0.312323	0.731707	0.096186	0	0	0	0	0	0
22311	u	novel	-1.13358	-0.0094208	chr15	-	70751678	70751879	MSTRG.12388.1	1	202	MSTRG.12388	.	10.4653	1.56174	0	0	0	0	0	0	0	0	0	0
22312	u	novel	-1.37974	-0.175718	chr15	+	70759443	70759684	MSTRG.12389.1	1	242	MSTRG.12389	.	37.814	5.64298	61.4917	6.83522	54.9587	7.22459	20.7934	4.20033	35.0579	4.35213	39	6.41056
2157	i	novel	-1.04212	-0.0004096	chr1	-	127181755	127182852	MSTRG.1239.1	1	1098	MSTRG.1239	CH242-58J12.2	9.74681	1.45451	0	0	8.4918	1.11629	0	0	7.19035	0.89262	3.57559	0.587732
22318	u	novel	-1.31054	-0.02048	chr15	-	70991030	70991263	MSTRG.12390.1	1	234	MSTRG.12390	.	9.03419	1.34817	15.3718	1.70868	0	0	0	0	1.91026	0.237142	0	0
22326	u	novel	-1.2093	-0.045056	chr15	-	71795962	71796736	MSTRG.12397.1	1	775	MSTRG.12397	.	1.75355	0.261681	5.18968	0.576868	2.90323	0.381643	3.48387	0.703753	3.19742	0.396932	8.35226	1.37289
22328	u	novel	-1.29416	-0.0004096	chr15	-	71802876	71803081	MSTRG.12399.1	1	206	MSTRG.12399	.	10.2621	1.53141	0	0	0	0	0	0	0	0	0	0
246	i	novel	-1.13694	-0.032768	chr1	+	15602768	15603454	MSTRG.124.1	1	687	MSTRG.124	RGS17	6.80495	1.0155	0	0	0	0	7.20524	1.45548	0	0	0	0
22329	u	novel	-1.03817	-0.004096	chr15	-	71807896	71808251	MSTRG.12400.1	1	356	MSTRG.12400	.	7.16854	1.06976	9.5309	1.05942	0	0	7.58427	1.53205	10.0983	1.25362	10.5674	1.737
22330	u	novel	-1.35408	-0.126976	chr15	-	71812442	71812810	MSTRG.12401.1	1	369	MSTRG.12401	.	11.4499	1.70866	0	0	0	0	0	0	0	0	0	0
22331	u	novel	-1.31121	-0.0004096	chr15	-	71820016	71820374	MSTRG.12402.1	1	359	MSTRG.12402	.	0	0	0	0	11.6992	1.53791	0	0	0	0	0	0
22332	u	novel	-1.08295	-0.0569344	chr15	-	71822602	71823102	MSTRG.12403.1	1	501	MSTRG.12403	.	10.2475	1.52923	0	0	0	0	0	0	0	0	0	0
22337	i	novel	-1.14889	-0.0004096	chr15	+	72443244	72443571	MSTRG.12406.1	1	328	MSTRG.12406	ENSSSCG00000015876	9.20732	1.374	0	0	5.4878	0.721399	0	0	0	0	1.3811	0.227016
22366	u	novel	-1.05851	-0.014336	chr15	-	73091543	73091834	MSTRG.12408.1	1	292	MSTRG.12408	.	19.0822	2.84763	17.9658	1.99701	19.4966	2.56292	6.62671	1.33862	5.63356	0.699359	0	0
22368	u	novel	-1.26059	-0.0073728	chr15	-	73124487	73126369	MSTRG.12410.1	1	1883	MSTRG.12410	.	8.9368	1.33364	7.21774	0.8023	0	0	0	0	0	0	3.57143	0.587048
22369	u	novel	-1.11121	-0.053248	chr15	-	73126942	73189346	MSTRG.12411.1	3	361	MSTRG.12411	.	12.1468	1.81266	8.84765	0.983475	2.55055	0.335282	7.1108	1.4364	7.21884	0.896157	2.76404	0.454334
22340	i	novel	-1.14338	-0.004096	chr15	+	72663482	72675516	MSTRG.12418.1	1	12035	MSTRG.12418	ENSSSCG00000015878	15.0522	2.24623	12.3177	1.3692	10.6023	1.39373	5.63357	1.138	12.8118	1.59048	9.26165	1.52237
22341	i	novel	-1.16877	-0.008192	chr15	+	72675880	72679021	MSTRG.12419.1	1	3142	MSTRG.12419	ENSSSCG00000015878	11.1448	1.66314	11.6257	1.29228	10.577	1.3904	5.65022	1.14136	0	0	6.80554	1.11865
2160	i	novel	-1.01668	-0.012288	chr1	-	127204277	127204910	MSTRG.1242.1	1	634	MSTRG.1242	CH242-58J12.2	0	0	0	0	10.1735	1.33736	0	0	0	0	0	0
22344	i	novel	-1.00757	-0.0421888	chr15	+	72692935	72694167	MSTRG.12422.1	1	1233	MSTRG.12422	ENSSSCG00000015878	9.65775	1.44122	0	0	11.1906	1.47106	0	0	0	0	8.61557	1.41617
22345	i	novel	-1.28273	-0.0004096	chr15	+	72700152	72700556	MSTRG.12423.1	1	405	MSTRG.12423	ENSSSCG00000015878	0	0	0	0	0	0	0	0	0	0	4.75309	0.781281
22347	i	novel	-1.21096	-0.0888832	chr15	+	72704885	72707494	MSTRG.12425.1	1	2610	MSTRG.12425	ENSSSCG00000015878	7.241	1.08057	4.11954	0.457915	5.741	0.754682	2.81111	0.567853	6.53908	0.811771	3.40881	0.560318
22348	i	novel	-1.14015	-0.126976	chr15	+	72710448	72712706	MSTRG.12426.1	1	2259	MSTRG.12426	ENSSSCG00000015878	10.3192	1.53993	0	0	0	0	0	0	0	0	0	0
22349	i	novel	-1.34816	-0.0004096	chr15	+	72713141	72713466	MSTRG.12427.1	1	326	MSTRG.12427	ENSSSCG00000015878	0	0	0	0	12.8834	1.69359	0	0	0	0	0	0
22350	i	novel	-1.14565	-0.008192	chr15	+	72717157	72723371	MSTRG.12428.1	1	6215	MSTRG.12428	ENSSSCG00000015878	10.0464	1.49922	10.3953	1.15551	0	0	0	0	11.2897	1.40152	0	0
22351	i	novel	-1.19995	-0.098304	chr15	+	72724206	72727658	MSTRG.12429.1	1	3453	MSTRG.12429	ENSSSCG00000015878	12.1775	1.81725	10.0116	1.11285	7.94266	1.0441	0	0	0	0	0	0
22384	u	novel	-1.08635	-0.0258048	chr15	-	73694050	73720933	MSTRG.12431.1	2	431	MSTRG.12431	.	7.05685	1.05309	2.6193	0.291153	8.26334	1.08626	5.40255	1.09133	1.6343	0.202884	4.76682	0.783539
22385	u	novel	-1.37952	-0.0004096	chr15	-	73794206	73794830	MSTRG.12432.1	1	625	MSTRG.12432	.	0	0	6	0.66694	0	0	3.12	0.63025	3.12	0.387322	9.9056	1.62822
22391	i	novel	-1.34553	-0.0004096	chr15	+	73939404	73939657	MSTRG.12435.1	1	254	MSTRG.12435	CD302	0	0	0	0	0	0	6.49606	1.31222	0	0	0	0
22397	u	novel	-1.41697	-0.012288	chr15	+	74089313	74089673	MSTRG.12439.1	1	361	MSTRG.12439	.	0	0	15.1138	1.68	18.5801	2.44245	3.69792	0.746992	13.0416	1.619	9.35591	1.53786
2162	i	novel	-1.15242	-0.016384	chr1	-	127212740	127213408	MSTRG.1244.1	1	669	MSTRG.1244	CH242-58J12.2	0	0	0	0	17.2407	2.26637	4.89985	0.989785	10.0897	1.25255	0	0
22399	i	novel	-1.14886	-0.0745472	chr15	+	74142896	74143157	MSTRG.12441.1	1	262	MSTRG.12441	PLA2R1	0	0	0	0	2.29008	0.301042	1.14504	0.231301	11.4351	1.41957	1.15267	0.189469
22402	u	novel	-1.19365	-0.073728	chr15	+	74359703	74360064	MSTRG.12443.1	1	362	MSTRG.12443	.	0	0	14.442	1.60532	0	0	0	0	0	0	2.06524	0.33947
22415	u	novel	-1.36865	-0.0004096	chr15	-	74556649	74557625	MSTRG.12446.1	1	977	MSTRG.12446	.	4.77891	0.713156	2.4565	0.273057	5.36131	0.70477	4.60594	0.930413	13.2794	1.64853	0	0
22416	u	novel	-1.02388	-0.159744	chr15	-	74558278	74559967	MSTRG.12447.1	1	1690	MSTRG.12447	.	10.2787	1.53389	0	0	0	0	0	0	0	0	0	0
22417	u	novel	-1.27096	-0.004096	chr15	-	74562944	74568885	MSTRG.12448.1	1	5942	MSTRG.12448	.	6.67099	0.995509	5.54679	0.616563	0	0	4.94413	0.998729	13.1548	1.63306	0	0
2163	i	novel	-1.17721	-0.2048	chr1	-	127214888	127221867	MSTRG.1245.1	1	6980	MSTRG.1245	CH242-58J12.2	12.996	1.93939	10.319	1.14702	2.52994	0.332573	2.07393	0.418939	8.94715	1.11071	0	0
22410	i	novel	-1.15297	-0.0479232	chr15	-	74462391	74464038	MSTRG.12452.1	1	1648	MSTRG.12452	RBMS1	0	0	12.5073	1.39027	0	0	0	0	0	0	0	0
22412	i	novel	-1.02805	-0.0217088	chr15	-	74473269	74491243	MSTRG.12454.1	1	17975	MSTRG.12454	RBMS1	15.5354	2.31834	15.7459	1.75027	11.4394	1.50376	0	0	0	0	7.59243	1.24799
22424	u	novel	-1.04891	-0.0393216	chr15	+	74712216	74713194	MSTRG.12458.1	1	979	MSTRG.12458	.	0	0	0	0	0	0	0	0	0	0	11.0945	1.82364
2164	i	novel	-1.21194	-0.0135168	chr1	-	127222833	127224831	MSTRG.1246.1	1	1999	MSTRG.1246	CH242-58J12.2	13.0525	1.94782	13.4357	1.49347	0	0	3.74887	0.757284	11.1526	1.3845	0	0
22452	u	novel	-1.36783	-0.02048	chr15	-	76414765	76414996	MSTRG.12464.1	1	232	MSTRG.12464	.	0	0	4.52586	0.50308	0	0	1.03448	0.208969	0	0	11.7155	1.92572
22465	u	novel	-1.03503	-0.0004096	chr15	+	77959277	77959569	MSTRG.12469.1	1	293	MSTRG.12469	.	0	0	0	0	0	0	0	0	0	0	9.20819	1.51358
22466	u	novel	-1.29997	-0.0356352	chr15	+	77991851	77993685	MSTRG.12470.1	1	1835	MSTRG.12470	.	0	0	0	0	0	0	6.77112	1.36779	0	0	0	0
22470	u	novel	-1.28708	-0.0004096	chr15	+	78010868	78011476	MSTRG.12474.1	1	609	MSTRG.12474	.	0	0	3.38916	0.376728	0	0	7.31034	1.47671	8.12808	1.00903	0	0
22471	u	novel	-1.35711	-0.0004096	chr15	+	78019669	78019997	MSTRG.12475.1	1	329	MSTRG.12475	.	12.3921	1.84927	0	0	0.911854	0.119868	1.82371	0.368395	0	0	0	0
22472	u	novel	-1.13413	-0.024576	chr15	+	78025003	78025221	MSTRG.12476.1	1	219	MSTRG.12476	.	10.3425	1.5434	0	0	0	0	0	0	0	0	0	0
22473	u	novel	-1.10502	-0.0188416	chr15	+	78028526	78028999	MSTRG.12477.1	1	474	MSTRG.12477	.	3.18565	0.475394	1.26582	0.140705	2.53165	0.332797	5.37975	1.08672	9.4346	1.17122	0	0
22474	u	novel	-1.0852	-0.004096	chr15	-	78032726	78033864	MSTRG.12478.1	1	1139	MSTRG.12478	.	0	0	0	0	0	0	0	0	11.9456	1.48294	4.37138	0.718538
22475	u	novel	-1.11808	-0.0004096	chr15	-	78037017	78037822	MSTRG.12479.1	1	806	MSTRG.12479	.	3.55955	0.531191	2.17122	0.241345	0	0	0	0	0	0	9.63275	1.58337
22476	u	novel	-1.04478	-0.049152	chr15	+	78037888	78047816	MSTRG.12480.1	1	9929	MSTRG.12480	.	15.9483	2.37996	13.1752	1.46452	0	0	0	0	16.0185	1.98856	12.0543	1.98141
22478	u	novel	-1.28571	-0.221184	chr15	+	78054988	78057849	MSTRG.12482.1	1	2862	MSTRG.12482	.	7.82285	1.1674	0	0	6.66527	0.876182	4.98847	1.00769	0	0	8.28512	1.36185
22479	u	novel	-1.29787	-0.028672	chr15	+	78063487	78065803	MSTRG.12483.1	1	2317	MSTRG.12483	.	0	0	10.9845	1.221	0	0	0	0	0	0	0	0
22480	u	novel	-1.22213	-0.024576	chr15	+	78067052	78069586	MSTRG.12484.1	1	2535	MSTRG.12484	.	9.71716	1.45009	5.64576	0.627564	5.42051	0.712553	6.33215	1.27911	0	0	5.83274	0.958748
22481	u	novel	-1.19533	-0.303104	chr15	+	78071246	78075327	MSTRG.12485.1	1	4082	MSTRG.12485	.	8.04091	1.19994	0	0	0	0	3.64821	0.73695	7.34787	0.912175	0	0
22482	u	novel	-1.25645	-0.0004096	chr15	+	78079750	78080622	MSTRG.12486.1	1	873	MSTRG.12486	.	10.0321	1.49708	0	0	0	0	0	0	0	0	0	0
22485	u	novel	-1.18458	-0.0004096	chr15	+	78103699	78103964	MSTRG.12488.1	1	266	MSTRG.12488	.	10.7857	1.60955	0	0	1.12782	0.148257	0	0	0	0	0	0
22486	u	novel	-1.27828	-0.0004096	chr15	+	78104467	78104765	MSTRG.12489.1	1	299	MSTRG.12489	.	9.0903	1.35654	1.00334	0.111529	1.00334	0.131895	0	0	3.01003	0.37367	0	0
2167	i	novel	-1.06694	-0.0004096	chr1	-	127256064	127257031	MSTRG.1249.1	1	968	MSTRG.1249	CH242-58J12.2	0	0	0	0	6.05682	0.796198	2.83347	0.57237	0	0	0	0
22487	u	novel	-1.26028	-0.0004096	chr15	+	78108005	78108214	MSTRG.12490.1	1	210	MSTRG.12490	.	10.0667	1.50225	0	0	0	0	0	0	0	0	0	0
22488	u	novel	-1.0897	-0.0004096	chr15	+	78119389	78119603	MSTRG.12491.1	1	215	MSTRG.12491	.	11.9395	1.78173	0	0	0	0	4.18605	0.845594	0	0	0	0
22490	u	novel	-1.29866	-0.0004096	chr15	-	78136631	78137162	MSTRG.12493.1	1	532	MSTRG.12493	.	9.07707	1.35457	0	0	0	0	0	0	0	0	0	0
22491	u	novel	-1.34891	-0.0004096	chr15	-	78145329	78145540	MSTRG.12494.1	1	212	MSTRG.12494	.	0	0	0	0	0	0	0	0	0	0	1.42453	0.234155
22492	u	novel	-1.34215	-0.032768	chr15	-	78156463	78157105	MSTRG.12495.1	1	643	MSTRG.12495	.	7.7605	1.1581	0	0	0	0	0	0	13.0078	1.61481	0	0
22493	u	novel	-1.2093	-0.0004096	chr15	-	78159549	78160425	MSTRG.12496.1	1	877	MSTRG.12496	.	10.675	1.59303	6.15735	0.684431	3.91562	0.514728	0	0	13.4698	1.67216	7.90992	1.30018
22494	u	novel	-1.14504	-0.0233472	chr15	-	78167659	78172530	MSTRG.12497.1	1	4872	MSTRG.12497	.	3.22003	0.480524	0	0	5.08169	0.668013	0	0	11.7732	1.46154	4.47208	0.735092
22495	u	novel	-1.35467	-0.0004096	chr15	-	78173463	78173822	MSTRG.12498.1	1	360	MSTRG.12498	.	18.0361	2.69152	0	0	0	0	0	0	0	0	0	0
22496	u	novel	-1.096	-0.04096	chr15	-	78178477	78178935	MSTRG.12499.1	1	459	MSTRG.12499	.	0	0	0	0	0	0	8.97603	1.81319	0	0	0	0
247	i	novel	-1.21927	-0.065536	chr1	+	15607122	15607773	MSTRG.125.1	1	652	MSTRG.125	RGS17	0	0	0	0	0	0	7.36196	1.48714	0	0	0	0
2168	i	novel	-1.16745	-0.0045056	chr1	-	127268033	127277926	MSTRG.1250.1	1	9894	MSTRG.1250	CH242-58J12.2	11.6063	1.73201	4.08708	0.454307	0	0	4.26491	0.861524	0	0	0	0
22497	u	novel	-1.25926	-0.249446	chr15	-	78182996	78183591	MSTRG.12500.1	1	596	MSTRG.12500	.	0	0	10.5336	1.17088	0	0	0	0	0	0	0	0
22498	u	novel	-1.0681	-0.118784	chr15	-	78186321	78188620	MSTRG.12501.1	1	2300	MSTRG.12501	.	0	0	0	0	0	0	0	0	12.9509	1.60774	0	0
22499	u	novel	-1.3173	-0.212992	chr15	-	78190837	78195644	MSTRG.12502.1	1	4808	MSTRG.12502	.	8.79576	1.31259	0	0	0	0	3.1391	0.634107	11.9765	1.48678	0	0
22507	u	novel	-1.39675	-0.0004096	chr15	-	78473913	78474127	MSTRG.12504.1	1	215	MSTRG.12504	.	0	0	12.5163	1.39127	0	0	6.93023	1.39993	0	0	3.51163	0.577218
22502	u	novel	-1.2996	-0.0004096	chr15	-	78208228	78208479	MSTRG.12506.1	1	252	MSTRG.12506	.	1.60523	0.239548	0	0	0	0	8.33333	1.68336	0	0	0	0
22504	u	novel	-1.16031	-0.0221184	chr15	-	78212551	78225443	MSTRG.12508.1	1	12893	MSTRG.12508	.	8.81556	1.31554	7.08889	0.787977	7.04886	0.926608	4.80679	0.970987	14.1387	1.7552	6.32312	1.03935
22505	u	novel	-1.1305	-0.0434176	chr15	-	78225905	78246117	MSTRG.12509.1	2	1163	MSTRG.12509	.	9.70421	1.44816	10.1337	1.12643	3.88199	0.510307	3.14875	0.636058	13.9897	1.7367	8.55116	1.40558
22516	u	novel	-1.09529	-0.2048	chr15	-	80038592	80039094	MSTRG.12511.1	1	503	MSTRG.12511	.	0	0	0	0	0.590457	0.077618	8.04374	1.62486	18.1551	2.2538	15.2326	2.50384
22519	i	novel	-1.1396	-0.128205	chr15	-	80400149	80400375	MSTRG.12513.1	1	227	MSTRG.12513	SCN2A	4.63877	0.692241	0	0	0	0	6.59471	1.33215	0	0	9.81938	1.61405
2170	i	novel	-1.07214	-0.0004096	chr1	-	127336740	127337101	MSTRG.1252.1	1	362	MSTRG.1252	CH242-58J12.2	10.8267	1.61566	0	0	0	0	0	0	0	0	0	0
22542	u	novel	-1.12961	-0.216678	chr15	+	81603864	81604086	MSTRG.12522.1	1	223	MSTRG.12522	.	5.41704	0.808383	4.03587	0.448615	16.1435	2.12214	4.70852	0.951135	6.72646	0.835033	0	0
22541	i	novel	-1.02834	-0.0004096	chr15	-	81532035	81532318	MSTRG.12524.1	1	284	MSTRG.12524	SCN7A	11.5528	1.72402	15.162	1.68535	16.2113	2.13105	3.4331	0.693496	13.588	1.68684	18.3151	3.01052
22552	u	novel	-1.04615	-0.0004096	chr15	+	82909835	82910072	MSTRG.12527.1	1	238	MSTRG.12527	.	0	0	0	0	0	0	0	0	0	0	1.02521	0.168517
22553	u	novel	-1.43239	-0.0004096	chr15	-	82966834	82967043	MSTRG.12528.1	1	210	MSTRG.12528	.	11.5048	1.71685	0	0	0	0	0	0	0	0	0	0
22554	u	novel	-1.202	-0.0004096	chr15	+	83093715	83094011	MSTRG.12529.1	1	297	MSTRG.12529	.	10.0875	1.50536	0	0	0	0	0	0	0	0	0	0
2171	i	novel	-1.06694	-0.0004096	chr1	-	127402133	127403100	MSTRG.1253.1	1	968	MSTRG.1253	CH242-58J12.2	0	0	0	0	6.05682	0.796198	2.83347	0.57237	0	0	0	0
22561	u	novel	-1.35214	-0.0004096	chr15	-	83689952	83690156	MSTRG.12532.1	1	205	MSTRG.12532	.	0	0	0	0	0	0	0	0	0	0	8.83902	1.4529
22562	u	novel	-1.38101	-0.0004096	chr15	-	83709642	83709941	MSTRG.12533.1	1	300	MSTRG.12533	.	12.02	1.79374	0	0	5.5	0.723002	0	0	0	0	0	0
22563	u	novel	-1.21089	-0.0004096	chr15	-	83713863	83714342	MSTRG.12534.1	1	480	MSTRG.12534	.	12.2771	1.8321	0	0	0	0	0	0	0	0	0	0
22576	u	novel	-1.17449	-0.079872	chr15	-	84957635	84957893	MSTRG.12538.1	1	259	MSTRG.12538	.	37.278	5.56298	19.6255	2.1815	19.6911	2.58849	28.2201	5.70054	41.1004	5.10226	40.1969	6.6073
2172	i	novel	-1.16873	-0.0045056	chr1	-	127413481	127423999	MSTRG.1254.1	1	10519	MSTRG.1254	CH242-58J12.2	12.2505	1.82813	3.84424	0.427313	0	0	4.5376	0.916609	9.50423	1.17987	0	0
22595	u	novel	-1.09445	-0.0004096	chr15	+	85176270	85176502	MSTRG.12544.1	1	233	MSTRG.12544	.	0	0	0	0	0	0	0	0	0	0	8.42489	1.38483
22600	u	novel	-1.00424	-0.0004096	chr15	+	85299211	85299484	MSTRG.12546.1	1	274	MSTRG.12546	.	1.10219	0.164479	0	0	10.4015	1.36732	0	0	0	0	0	0
22628	i	novel	-1.317	-0.0004096	chr15	-	86943962	86944181	MSTRG.12556.1	1	220	MSTRG.12556	METTL8	0	0	0	0	0	0	0	0	0	0	9.94091	1.63402
22651	u	novel	-1.03822	-0.008192	chr15	-	87561164	87562006	MSTRG.12564.1	1	843	MSTRG.12564	.	0	0	0	0	5.14828	0.676767	0	0	0	0	8.59431	1.41267
22652	u	novel	-1.08494	-0.0004096	chr15	-	87564786	87565236	MSTRG.12565.1	1	451	MSTRG.12565	.	0	0	11.3902	1.2661	0	0	0	0	0	0	1.99335	0.327653
22653	u	novel	-1.4134	-0.0004096	chr15	-	87569309	87569803	MSTRG.12566.1	1	495	MSTRG.12566	.	10.0667	1.50225	0	0	4.24242	0.557687	1.21212	0.244852	0	0	0	0
22655	u	novel	-1.15424	-0.008192	chr15	-	87576654	87577462	MSTRG.12568.1	1	809	MSTRG.12568	.	0	0	10.9257	1.21446	0	0	0	0	0	0	3.911	0.642865
2226	u	novel	-1.04274	-0.0004096	chr1	+	128732012	128732439	MSTRG.1257.1	1	428	MSTRG.1257	.	16.1238	2.40615	0	0	9.45561	1.24299	6.99533	1.41308	0	0	4.92523	0.809577
22660	u	novel	-1.1145	-0.0036864	chr15	-	87657746	87658068	MSTRG.12570.1	1	323	MSTRG.12570	.	9.34985	1.39527	0	0	0	0	0	0	0	0	0	0
22670	u	novel	-1.22435	-0.004096	chr15	+	87902463	87905245	MSTRG.12571.1	1	2783	MSTRG.12571	.	6.85735	1.02332	5.88322	0.65396	4.92454	0.647355	5.95544	1.20302	11.9368	1.48185	9.6572	1.58739
22672	u	novel	-1.37764	-0.0004096	chr15	+	87952061	87952296	MSTRG.12573.1	1	236	MSTRG.12573	.	0	0	0.635593	0.07065	0	0	0	0	0	0	9.59746	1.57757
22673	u	novel	-1.34928	-0.0077824	chr15	-	88003024	88003439	MSTRG.12574.1	1	416	MSTRG.12574	.	0	0	10.7416	1.194	0	0	0	0	10.5937	1.31512	11.2043	1.84169
22691	u	novel	-1.17013	-0.036864	chr15	-	89222066	89222408	MSTRG.12579.1	1	343	MSTRG.12579	.	0.440233	0.065696	0	0	4.36152	0.573343	9.9242	2.00472	11.3703	1.41152	7.81341	1.28432
22696	u	novel	-1.37444	-0.0004096	chr15	-	89295137	89296704	MSTRG.12583.1	1	1568	MSTRG.12583	.	13.5421	2.02088	10.6448	1.18324	8.11926	1.06732	6.88201	1.39019	1.24362	0.154385	9.68814	1.59247
22697	u	novel	-1.14689	-0.0344064	chr15	+	89323374	89323593	MSTRG.12584.1	1	220	MSTRG.12584	.	0	0	5.45455	0.606309	1.36364	0.179257	0	0	0	0	12.2545	2.01432
22698	u	novel	-1.21205	-0.0004096	chr15	-	89387677	89388006	MSTRG.12586.1	1	330	MSTRG.12586	.	0	0	0	0	0	0	7.1303	1.44034	0	0	0	0
22699	u	novel	-1.21197	-0.0004096	chr15	-	89389073	89389823	MSTRG.12587.1	1	751	MSTRG.12587	.	14.4687	2.15916	11.0173	1.22465	6.58722	0.865922	5.57523	1.12621	6.19174	0.768652	0	0
22716	u	novel	-1.22533	-0.016384	chr15	+	89880097	89880506	MSTRG.12595.1	1	410	MSTRG.12595	.	13.3878	1.99786	5.4878	0.610006	0	0	5.4878	1.10855	0	0	8.26585	1.35869
22720	i	novel	-1.27315	-0.049152	chr15	-	89901533	89902130	MSTRG.12597.1	1	598	MSTRG.12597	ENSSSCG00000015969	0	0	0	0	2.25752	0.296763	6.52174	1.31741	0	0	1.01003	0.166023
248	i	novel	-1.35006	-0.0004096	chr1	+	15615580	15615881	MSTRG.126.1	1	302	MSTRG.126	RGS17	10.5	1.56691	0	0	0	0	0	0	0	0	0	0
22727	u	novel	-1.13556	-0.02048	chr15	-	90044288	90044696	MSTRG.12600.1	1	409	MSTRG.12600	.	0	0	14.291	1.58854	4.40098	0.57853	0	0	1.58749	0.197073	0	0
22728	u	novel	-1.21729	-0.077824	chr15	-	90048846	90049337	MSTRG.12601.1	1	492	MSTRG.12601	.	6.48577	0.967869	0	0	0	0	0	0	12.8923	1.60047	0	0
22729	u	novel	-1.16253	-0.057344	chr15	-	90053704	90055251	MSTRG.12602.1	1	1548	MSTRG.12602	.	7.51486	1.12144	10.9548	1.2177	0	0	0	0	6.81589	0.846135	0	0
22731	u	novel	-1.15824	-0.0004096	chr15	-	90109780	90110919	MSTRG.12604.1	1	1140	MSTRG.12604	.	9.93772	1.483	0	0	0	0	0	0	0	0	6.63684	1.09092
22732	u	novel	-1.14695	-0.024576	chr15	-	90112396	90112805	MSTRG.12605.1	1	410	MSTRG.12605	.	6.26098	0.934323	0	0	0	0	8.41463	1.69978	11.3415	1.40795	0	0
22733	u	novel	-1.16757	-0.0004096	chr15	-	90202874	90203167	MSTRG.12606.1	1	294	MSTRG.12606	.	11.2891	1.68467	0	0	1.53061	0.201206	0	0	0	0	0	0
22737	u	novel	-1.03558	-0.169574	chr15	-	90311229	90311563	MSTRG.12609.1	1	335	MSTRG.12609	.	12.6209	1.88341	0	0	0	0	0	0	0	0	0	0
22745	u	novel	-1.30965	-0.376832	chr15	+	91126553	91126777	MSTRG.12611.1	1	225	MSTRG.12611	.	2.01333	0.300449	17.3333	1.92672	0	0	0	0	6.66667	0.82761	0	0
22751	u	novel	-1.15419	-0.0004096	chr15	-	91364886	91365149	MSTRG.12615.1	1	264	MSTRG.12615	.	0	0	0	0	0	0	0	0	0	0	9.15151	1.50427
22767	x	novel	-1.10364	-0.0544768	chr15	-	91441685	91455278	MSTRG.12619.1	2	3158	MSTRG.12619	HOXD1	8.58647	1.28136	13.1378	1.46036	4.19685	0.551697	4.63868	0.937029	0.455265	0.056517	3.59938	0.591642
22768	u	novel	-1.00938	-0.012288	chr15	-	91444267	91445907	MSTRG.12619.2	2	442	MSTRG.12619	.	0	0	0.528287	0.058723	11.2323	1.47654	0.68552	0.138477	0.90425	0.112255	0.640271	0.105244
22769	u	novel	-1.21968	-0.069632	chr15	+	91445990	91446753	MSTRG.12620.1	2	596	MSTRG.12620	.	2.01739	0.301055	0	0	2.11866	0.278508	3.11365	0.628968	0	0	8.80034	1.44654
22770	u	novel	-1.11493	-0.167936	chr15	-	91454536	91454886	MSTRG.12621.1	1	351	MSTRG.12621	.	0	0	0	0	9.69801	1.27485	10.2051	2.06147	0	0	9.02279	1.48311
22775	i	novel	-1.03164	-0.159744	chr15	+	91541725	91542677	MSTRG.12624.1	1	953	MSTRG.12624	MTX2	0	0	0	0	6.61595	0.869699	0	0	0	0	0	0
22776	i	novel	-1.13769	-0.0004096	chr15	+	91546080	91546380	MSTRG.12625.1	1	301	MSTRG.12625	MTX2	0	0	0	0	11.8339	1.55562	0	0	11.2783	1.4001	0	0
22777	i	novel	-1.14343	-0.0004096	chr15	+	91546633	91546887	MSTRG.12626.1	1	255	MSTRG.12626	MTX2	0	0	6.51845	0.724569	0	0	0	0	0	0	10.6275	1.74687
22795	u	novel	-1.07199	-0.0008192	chr15	+	92473954	92476097	MSTRG.12630.1	2	1066	MSTRG.12630	.	0.757505	0.113042	0	0	0	0	0	0	0	0	0	0
22793	u	novel	-1.33186	-0.0512	chr15	+	92469142	92469875	MSTRG.12633.1	1	734	MSTRG.12633	.	2.88011	0.429798	4.83651	0.537611	0	0	4.29155	0.866907	0	0	9.46321	1.5555
22796	u	novel	-1.40956	-0.20521	chr15	+	92570042	92570253	MSTRG.12634.1	1	212	MSTRG.12634	.	11.9811	1.78794	2.81604	0.313022	0	0	0	0	1.59906	0.198509	0	0
22803	u	novel	-1.25987	-0.0004096	chr15	+	93413362	93413598	MSTRG.12638.1	1	237	MSTRG.12638	.	0	0	13.2911	1.4774	0	0	0	0	0	0	0	0
22804	u	novel	-1.26299	-0.114278	chr15	+	93444531	93444759	MSTRG.12639.1	1	229	MSTRG.12639	.	9.20524	1.37369	0	0	3.93013	0.516635	0.563319	0.113792	0	0	0	0
22806	u	novel	-1.20328	-0.012288	chr15	-	93483772	93484156	MSTRG.12640.1	1	385	MSTRG.12640	.	0	0	0	0	0	0	0	0	0	0	10.5896	1.74065
22807	u	novel	-1.32437	-0.0004096	chr15	-	93519429	93519657	MSTRG.12641.1	1	229	MSTRG.12641	.	11.2096	1.67281	0	0	0	0	0	0	0	0	0	0
22808	u	novel	-1.38713	-0.0622592	chr15	-	93522257	93522501	MSTRG.12642.1	1	245	MSTRG.12642	.	9.86122	1.47159	0	0	0	0	0	0	0	0	0	0
22812	i	novel	-1.42069	-0.0004096	chr15	+	93598978	93599224	MSTRG.12645.1	1	247	MSTRG.12645	OSBPL6	15.247	2.2753	1.21457	0.135008	0	0	0	0	0	0	0	0
22816	i	novel	-1.16383	-0.0004096	chr15	-	93703792	93704086	MSTRG.12647.1	1	295	MSTRG.12647	FKBP7	11.261	1.68048	0	0	0	0	1.01695	0.205427	0	0	0	0
22821	u	novel	-1.34085	-0.0004096	chr15	-	94369165	94369400	MSTRG.12651.1	1	236	MSTRG.12651	.	10.2373	1.52771	0	0	0	0	0	0	0	0	0	0
22822	u	novel	-1.04493	-0.0004096	chr15	-	94369839	94370259	MSTRG.12652.1	1	421	MSTRG.12652	.	15.0261	2.24234	0	0	0	0	0	0	0	0	0	0
22823	u	novel	-1.03405	-0.192922	chr15	-	94387921	94388403	MSTRG.12653.1	1	483	MSTRG.12653	.	9.06625	1.35295	7.14493	0.794207	0	0	0	0	0	0	5.32712	0.875637
22832	u	novel	-1.25076	-0.0004096	chr15	-	96066632	96067306	MSTRG.12656.1	1	675	MSTRG.12656	.	14.1985	2.11884	0	0	6.44444	0.847154	0	0	0	0	0	0
22834	u	novel	-1.02173	-0.0032768	chr15	-	96090062	96090515	MSTRG.12658.1	1	454	MSTRG.12658	.	0	0	0	0	11.2335	1.4767	0	0	0	0	1.9956	0.328023
22835	u	novel	-1.35027	-0.0004096	chr15	-	96099537	96100081	MSTRG.12659.1	1	545	MSTRG.12659	.	0	0	0	0	0	0	0	0	0	0	8.2844	1.36174
22837	u	novel	-1.25349	-0.12288	chr15	-	96116199	96118042	MSTRG.12661.1	1	1844	MSTRG.12661	.	9.74078	1.45361	0	0	0	0	0	0	0.861616	0.106962	0	0
22838	u	novel	-1.30908	-0.0004096	chr15	-	96127689	96127923	MSTRG.12662.1	1	235	MSTRG.12662	.	0	0	0	0	0	0	0	0	14.0426	1.74326	0	0
22839	u	novel	-1.11909	-0.0004096	chr15	-	96131821	96132858	MSTRG.12663.1	1	1038	MSTRG.12663	.	10.0096	1.49373	0	0	0	0	0	0	4.04624	0.502307	0	0
22840	u	novel	-1.07945	-0.0487424	chr15	-	96137508	96138630	MSTRG.12664.1	1	1123	MSTRG.12664	.	9.27516	1.38413	0	0	3.38914	0.445519	1.46928	0.296799	0	0	0	0
22841	u	novel	-1.15771	-0.045056	chr15	-	96139044	96140477	MSTRG.12665.1	1	1434	MSTRG.12665	.	12.5112	1.86704	0	0	0	0	7.20223	1.45487	0	0	4.70153	0.772807
22842	u	novel	-1.32995	-0.077824	chr15	-	96140770	96142108	MSTRG.12666.1	1	1339	MSTRG.12666	.	0	0	0	0	10.6311	1.39751	2.91262	0.588358	0	0	3.03137	0.498276
22849	u	novel	-1.18016	-0.0045056	chr15	-	96159734	96161456	MSTRG.12668.1	1	1723	MSTRG.12668	.	7.60766	1.13529	12.3326	1.37085	9.90133	1.30158	3.3935	0.685497	7.22055	0.896369	5.16425	0.848865
22845	u	novel	-1.11831	-0.0004096	chr15	-	96152765	96153368	MSTRG.12670.1	1	604	MSTRG.12670	.	0	0	9.68543	1.0766	0	0	4.96689	1.00333	0	0	0	0
22846	u	novel	-1.26274	-0.002048	chr15	-	96153742	96154780	MSTRG.12671.1	1	1039	MSTRG.12671	.	12.0895	1.80411	7.50722	0.834478	0	0	0	0	0	0	5.19538	0.853982
22847	u	novel	-1.23832	-0.0004096	chr15	-	96155162	96156876	MSTRG.12672.1	1	1715	MSTRG.12672	.	17.0991	2.5517	0	0	0	0	0	0	0	0	0	0
22848	u	novel	-1.33937	-0.063488	chr15	-	96158195	96158867	MSTRG.12673.1	1	673	MSTRG.12673	.	7.40416	1.10492	0	0	0	0	0	0	0	0	9.38781	1.54311
22856	u	novel	-1.10826	-0.19497	chr15	+	96798236	96798462	MSTRG.12674.1	1	227	MSTRG.12674	.	3.99119	0.595604	0	0	0	0	8.59031	1.73527	0	0	2.66079	0.437364
22857	u	novel	-1.21507	-0.0856064	chr15	+	96825272	96825496	MSTRG.12675.1	1	225	MSTRG.12675	.	9.39555	1.4021	3.33333	0.370522	12.6667	1.66509	7.41333	1.49752	1.33333	0.165522	1.34222	0.220626
22859	u	novel	-1.03328	-0.077824	chr15	+	96999704	97002400	MSTRG.12677.1	1	2697	MSTRG.12677	.	10.112	1.50901	0	0	0	0	0	0	0	0	0	0
22860	u	novel	-1.19762	-0.0004096	chr15	+	97007687	97008079	MSTRG.12678.1	1	393	MSTRG.12678	.	11.9109	1.77747	0	0	0	0	0.763359	0.154201	3.56927	0.443095	3.84224	0.631562
22876	i	novel	-1.07662	-0.0004096	chr15	+	98120635	98120938	MSTRG.12684.1	1	304	MSTRG.12684	DUSP19	11.9211	1.77897	0	0	0.986842	0.129725	0.986842	0.199345	0.493421	0.061254	0.993421	0.163292
22878	u	novel	-1.01919	-0.0004096	chr15	+	98132004	98132275	MSTRG.12686.1	1	272	MSTRG.12686	.	11.1029	1.65689	0	0	0	0	0	0	0	0	0	0
22864	u	novel	-1.1952	-0.012288	chr15	-	97218480	97220815	MSTRG.12687.1	1	2336	MSTRG.12687	.	0	0	0	0	9.04152	1.18855	0	0	0	0	0	0
22865	u	novel	-1.27065	-0.053248	chr15	-	97222141	97222885	MSTRG.12688.1	1	745	MSTRG.12688	.	10.3369	1.54257	0	0	0	0	0.604027	0.122015	0	0	0.608054	0.099948
2270	u	novel	-1.24027	-0.012288	chr1	+	132228271	132229886	MSTRG.1269.1	1	1616	MSTRG.1269	.	3.17698	0.4741	0	0	0	0	0	0	0	0	9.01547	1.4819
22887	u	novel	-1.40493	-0.0667648	chr15	+	101481691	101481943	MSTRG.12693.1	1	253	MSTRG.12693	.	17.3083	2.58291	31.664	3.51967	13.4822	1.7723	6.47431	1.30783	18.3557	2.27871	27.9249	4.59011
22890	u	novel	-1.35548	-0.110592	chr15	+	101533831	101534797	MSTRG.12695.1	1	967	MSTRG.12695	.	0	0	0	0	9.25957	1.21721	0	0	0	0	8.50879	1.39862
22891	u	novel	-1.05289	-0.106496	chr15	+	101535558	101537822	MSTRG.12696.1	1	2265	MSTRG.12696	.	9.68609	1.44545	0	0	6.1099	0.803177	5.03311	1.0167	8.18013	1.01549	4.46455	0.733853
22893	u	novel	-1.11804	-0.0004096	chr15	+	101543422	101543656	MSTRG.12698.1	1	235	MSTRG.12698	.	10.2809	1.53421	0	0	0	0	0	0	0	0	0	0
249	i	novel	-1.06599	-0.028672	chr1	+	15636017	15636296	MSTRG.127.1	1	280	MSTRG.127	RGS17	0	0	0	0	0	0	0	0	0	0	8.52857	1.40187
2271	u	novel	-1.13549	-0.047104	chr1	+	132237463	132238763	MSTRG.1270.1	1	1301	MSTRG.1270	.	17.9055	2.67202	0	0	0	0	0	0	0	0	0	0
22919	i	novel	-1.3105	-0.0909312	chr15	+	103648787	103649022	MSTRG.12704.1	1	236	MSTRG.12704	GULP1	10.1356	1.51253	0	0	0	0	0	0	0	0	3.83898	0.631027
22923	u	novel	-1.31104	-0.0004096	chr15	-	104360304	104360511	MSTRG.12706.1	1	208	MSTRG.12706	.	12.3413	1.84169	0	0	0	0	0	0	0	0	0	0
22924	u	novel	-1.30052	-0.0004096	chr15	-	104460437	104460660	MSTRG.12707.1	1	224	MSTRG.12707	.	10.7857	1.60955	0	0	0	0	0	0	0	0	0	0
22925	u	novel	-1.08195	-0.0004096	chr15	-	104469953	104470220	MSTRG.12708.1	1	268	MSTRG.12708	.	10.1418	1.51346	0	0	0	0	0	0	0	0	5.63433	0.926134
22926	u	novel	-1.24769	-0.0004096	chr15	-	104487596	104487806	MSTRG.12709.1	1	211	MSTRG.12709	.	10.019	1.49513	1.4218	0.158043	0.7109	0.093451	0	0	0	0	0	0
22947	i	novel	-1.00901	-0.04096	chr15	-	105386571	105387825	MSTRG.12716.1	1	1255	MSTRG.12716	OSGEPL1	0.84731	0.126444	12.6454	1.40562	10.9912	1.44485	9.29482	1.87758	0	0	7.15697	1.17642
22948	u	novel	-1.18499	-0.0004096	chr15	-	105394451	105394886	MSTRG.12717.1	1	436	MSTRG.12717	.	9.69725	1.44712	0	0	0	0	0	0	0	0	0	0
22956	u	novel	-1.33887	-0.0004096	chr15	-	105959718	105960037	MSTRG.12721.1	1	320	MSTRG.12721	.	11.325	1.69003	0	0	0	0	0	0	0	0	0.8625	0.141772
22962	u	novel	-1.1257	-0.0004096	chr15	-	106212035	106212280	MSTRG.12726.1	1	246	MSTRG.12726	.	11.6626	1.74041	0.609756	0.067778	0	0	0.609756	0.123173	0	0	0	0
2274	u	novel	-1.20606	-0.0684032	chr1	+	132257352	132257933	MSTRG.1273.1	1	582	MSTRG.1273	.	16.5498	2.46972	0	0	3.60825	0.474322	2.31959	0.468564	9.78007	1.21411	3.58076	0.588581
22970	i	novel	-1.1055	-0.094208	chr15	-	106515500	106516791	MSTRG.12732.1	1	1292	MSTRG.12732	NEMP2	10.1215	1.51043	0	0	0	0	0	0	0	0	0	0
22971	u	novel	-1.16295	-0.0004096	chr15	+	106588516	106588882	MSTRG.12733.1	1	367	MSTRG.12733	.	0	0	4.06632	0.451999	0	0	6.53951	1.321	0	0	0	0
22975	u	novel	-1.08154	-0.032768	chr15	+	106816423	106822662	MSTRG.12735.1	1	6240	MSTRG.12735	.	26.6809	3.98158	27.6313	3.0714	18.5115	2.43343	10.4676	2.11449	21.1221	2.62213	15.6971	2.58019
22980	u	novel	-1.32003	-0.0004096	chr15	+	106877212	106877463	MSTRG.12736.1	1	252	MSTRG.12736	.	0	0	0	0	0	0	0	0	0	0	10.4048	1.71027
22984	u	novel	-1.37939	-0.0004096	chr15	-	106902462	106902836	MSTRG.12739.1	1	375	MSTRG.12739	.	12.4747	1.86159	0	0	0	0	6.384	1.28959	0	0	0	0
2275	u	novel	-1.27277	-0.0004096	chr1	+	132260732	132261465	MSTRG.1274.1	1	734	MSTRG.1274	.	9.64033	1.43862	0	0	0	0	0	0	0	0	0	0
22983	i	novel	-1.21218	-0.077824	chr15	+	106898342	106898831	MSTRG.12741.1	1	490	MSTRG.12741	STAT1	8.32041	1.24165	12.5694	1.39717	10.8714	1.4291	6.68163	1.34971	10.9061	1.3539	10.4653	1.72022
22986	i	novel	-1.49	-0.0864256	chr15	+	106916519	106916735	MSTRG.12743.1	1	217	MSTRG.12743	STAT4	27.4194	4.09178	51.0507	5.67463	39.4009	5.17944	39.0922	7.89674	69.3733	8.6121	69.5023	11.4243
22988	u	novel	-1.18403	-0.069632	chr15	+	107185096	107185919	MSTRG.12744.1	1	824	MSTRG.12744	.	4.03155	0.601627	8.40049	0.933771	11.4709	1.5079	5.76214	1.16397	11.4248	1.41829	8.50243	1.39757
22990	u	novel	-1.05737	-0.024576	chr15	+	107192962	107194683	MSTRG.12746.1	1	1722	MSTRG.12746	.	11.5494	1.72351	0	0	0	0	6.87689	1.38915	9.2259	1.14532	0	0
22991	u	novel	-1.1448	-0.008192	chr15	+	107201919	107202583	MSTRG.12747.1	1	665	MSTRG.12747	.	10.4451	1.55872	0	0	0	0	0	0	0	0	7.26617	1.19436
22992	u	novel	-1.00638	-0.090112	chr15	+	107203802	107205076	MSTRG.12748.1	1	1275	MSTRG.12748	.	9.35137	1.3955	12.7137	1.41322	8.5851	1.12855	0	0	13.3475	1.65697	6.59843	1.08461
22993	u	novel	-1.05866	-0.0004096	chr15	+	107255535	107255807	MSTRG.12749.1	1	273	MSTRG.12749	.	0	0	0	0	0	0	0	0	11.8462	1.4706	0	0
2276	u	novel	-1.07298	-0.0106496	chr1	+	132268599	132268960	MSTRG.1275.1	1	362	MSTRG.1275	.	10.4171	1.55454	0	0	4.40608	0.5792	0	0	0	0	0	0
22994	u	novel	-1.28889	-0.0004096	chr15	+	107257500	107257916	MSTRG.12750.1	1	417	MSTRG.12750	.	9.76259	1.45687	0	0	0	0	0	0	0	0	0	0
22996	i	novel	-1.21662	-0.0004096	chr15	+	107267775	107268220	MSTRG.12752.1	1	446	MSTRG.12752	ENSSSCG00000020860	0	0	0	0	0	0	0	0	0	0	12.5	2.05467
23000	u	novel	-1.2496	-0.0004096	chr15	+	107292005	107292220	MSTRG.12756.1	1	216	MSTRG.12756	.	9.77315	1.45844	4.12963	0.459036	0.694444	0.091288	2.56481	0.5181	0	0	0	0
23002	u	novel	-1.2993	-0.024576	chr15	+	107324402	107325142	MSTRG.12758.1	1	741	MSTRG.12758	.	0	0	0	0	0	0	9.40621	1.90008	0	0	0	0
23003	u	novel	-1.16459	-0.139264	chr15	+	107325731	107327070	MSTRG.12759.1	1	1340	MSTRG.12759	.	0	0	0	0	0	0	0	0	0	0	7.1806	1.1803
2277	u	novel	-1.0663	-0.04096	chr1	+	132286266	132287076	MSTRG.1276.1	1	811	MSTRG.1276	.	9.1233	1.36147	0	0	0	0	1.2947	0.261533	0	0	0	0
23004	u	novel	-1.23826	-0.0004096	chr15	+	107328942	107329209	MSTRG.12760.1	1	268	MSTRG.12760	.	9.57836	1.42938	10.1269	1.12567	0	0	0	0	0	0	2.75	0.452027
23017	u	novel	-1.12882	-0.417792	chr15	+	107536856	107537132	MSTRG.12761.1	1	277	MSTRG.12761	.	39.7798	5.93632	18.787	2.0883	21.1083	2.77479	9.19495	1.85741	18.9314	2.35017	10.3574	1.70248
23005	u	novel	-1.34559	-0.0004096	chr15	+	107337910	107338278	MSTRG.12762.1	1	369	MSTRG.12762	.	0	0	9.56098	1.06277	10.5691	1.38936	0	0	0	0	0	0
23007	u	novel	-1.21973	-0.024576	chr15	+	107343267	107344800	MSTRG.12764.1	1	1534	MSTRG.12764	.	2.21953	0.331219	0	0	0	0	0	0	0	0	8.63885	1.42
23008	u	novel	-1.01338	-0.196608	chr15	+	107345410	107345814	MSTRG.12765.1	1	405	MSTRG.12765	.	1.49136	0.222555	8.51111	0.946067	0	0	0	0	0	0	0	0
23009	u	novel	-1.0657	-0.024576	chr15	+	107346829	107347530	MSTRG.12766.1	1	702	MSTRG.12766	.	10.1097	1.50866	0	0	0	0	0	0	0	0	8.5869	1.41146
23024	u	novel	-1.00071	-0.0004096	chr15	+	107681456	107681683	MSTRG.12768.1	1	228	MSTRG.12768	.	9.27193	1.38365	0	0	0	0	0	0	0	0	0	0
2278	u	novel	-1.02138	-0.016384	chr1	+	132300764	132301124	MSTRG.1277.1	1	361	MSTRG.1277	.	11.2936	1.68534	0	0	0	0	0	0	0	0	0.836565	0.137509
23019	u	novel	-1.0606	-0.0004096	chr15	-	107634877	107635172	MSTRG.12770.1	1	296	MSTRG.12770	.	9.69257	1.44642	0	0	0	0	0	0	0	0	0	0
23020	u	novel	-1.14462	-0.0004096	chr15	-	107656060	107656475	MSTRG.12771.1	1	416	MSTRG.12771	.	13.4303	2.0042	0	0	0	0	0	0	0	0	0	0
23029	u	novel	-1.21012	-0.057344	chr15	-	108839591	108840091	MSTRG.12773.1	1	501	MSTRG.12773	.	0	0	1.79641	0.199683	0	0	0	0	4.19162	0.520354	9.25349	1.52103
23032	u	novel	-1.33073	-0.0004096	chr15	-	108849977	108850380	MSTRG.12776.1	1	404	MSTRG.12776	.	20.1609	3.0086	9.59406	1.06644	0	0	2.9703	0.600009	0	0	4.82673	0.793387
23033	u	novel	-1.3919	-0.0004096	chr15	-	108852457	108852733	MSTRG.12777.1	1	277	MSTRG.12777	.	17.444	2.60317	0	0	0	0	0	0	0	0	4.36101	0.716834
23034	u	novel	-1.23494	-0.0004096	chr15	-	108853158	108853744	MSTRG.12778.1	1	587	MSTRG.12778	.	10.0324	1.49713	1.78876	0.198832	0	0	0.76661	0.154858	0	0	0	0
23035	u	novel	-1.37332	-0.0630784	chr15	-	108856665	108857213	MSTRG.12779.1	1	549	MSTRG.12779	.	0	0	0	0	0	0	0	0	0	0	8.5173	1.40002
23037	u	novel	-1.22026	-0.0405504	chr15	-	108865429	108866655	MSTRG.12781.1	1	1227	MSTRG.12781	.	16.8427	2.51343	0	0	0	0	0	0	0	0	0	0
23043	u	novel	-1.42377	-0.135168	chr15	+	109689129	109689375	MSTRG.12782.1	1	247	MSTRG.12782	.	9.78138	1.45967	0	0	0	0	0	0	0	0	0	0
23038	u	novel	-1.16669	-0.0004096	chr15	-	108867702	108868467	MSTRG.12783.1	1	766	MSTRG.12783	.	21.0183	3.13655	14.6449	1.62788	5.67885	0.746513	4.06005	0.820143	6.84987	0.850353	12.2089	2.00682
23039	u	novel	-1.07422	-0.0053248	chr15	-	108869503	108894720	MSTRG.12784.1	3	3661	MSTRG.12784	.	13.1227	1.9583	2.73978	0.304545	6.42127	0.844107	5.54848	1.12081	8.71224	1.08155	10.5561	1.73515
23040	u	novel	-1.32564	-0.0004096	chr15	-	108870281	108874692	MSTRG.12784.2	2	2338	MSTRG.12784	.	8.44388	1.26008	7.46889	0.830218	3.06758	0.403248	5.55774	1.12268	6.02181	0.747557	5.03475	0.82758
23047	u	novel	-1.04193	-0.036864	chr15	-	111537204	111537853	MSTRG.12787.1	1	650	MSTRG.12787	.	9.87308	1.47336	1.36923	0.152199	0	0	0	0	0	0	0.929231	0.152741
23057	u	novel	-1.30669	-0.0004096	chr15	+	111831343	111831618	MSTRG.12791.1	1	276	MSTRG.12791	.	12.0362	1.79616	1.63044	0.181234	3.26087	0.428657	5.42391	1.09565	3.80435	0.472277	0	0
23061	u	novel	-1.09958	-0.0004096	chr15	+	111960374	111961034	MSTRG.12794.1	1	661	MSTRG.12794	.	10.2753	1.53338	0	0	0	0	0	0	3.177	0.394398	0.685325	0.112649
23062	u	novel	-1.39547	-0.053248	chr15	+	111964588	111965213	MSTRG.12795.1	1	626	MSTRG.12795	.	13.508	2.01579	0	0	4.53355	0.595957	2.14696	0.433693	1.67732	0.208225	1.92332	0.316143
23064	u	novel	-1.24106	-0.0262144	chr15	+	111994297	111994576	MSTRG.12797.1	1	280	MSTRG.12797	.	11.8643	1.7705	0	0	0	0	0	0	6.42857	0.798052	0	0
251	u	novel	-1.02412	-0.02048	chr1	-	15695636	15696423	MSTRG.128.1	1	788	MSTRG.128	.	4.98223	0.743497	0	0	0	0	7.71193	1.55783	0	0	0	0
23087	u	novel	-1.23457	-0.057344	chr15	-	112598340	112599014	MSTRG.12806.1	1	675	MSTRG.12806	.	0.223704	0.033383	5.11111	0.568134	3.74815	0.492712	0.660741	0.133472	3.32148	0.412334	9.83111	1.61597
23089	u	novel	-1.1188	-0.024576	chr15	-	112623166	112623434	MSTRG.12807.1	1	269	MSTRG.12807	.	0	0	10.5948	1.17768	0	0	0	0	6.69145	0.830687	0	0
23090	u	novel	-1.36004	-0.131891	chr15	-	112623805	112624844	MSTRG.12808.1	1	1040	MSTRG.12808	.	7.24615	1.08134	0	0	3.0579	0.401976	0	0	0	0	0	0
23091	u	novel	-1.29101	-0.192512	chr15	-	112625343	112627240	MSTRG.12809.1	1	1898	MSTRG.12809	.	121.542	18.1377	84.5411	9.39731	56.9289	7.48358	68.2966	13.7961	87.736	10.8917	95.2592	15.6581
23101	u	novel	-1.28096	-0.0004096	chr15	-	114102291	114102590	MSTRG.12811.1	1	300	MSTRG.12811	.	9.06	1.35202	0	0	0	0	0	0	0	0	0	0
23111	u	novel	-1.21326	-0.036864	chr15	+	114171209	114173221	MSTRG.12819.1	1	2013	MSTRG.12819	.	10.5867	1.57985	0	0	0	0	0	0	0	0	2.97566	0.489119
23112	u	novel	-1.10934	-0.0004096	chr15	-	114176891	114177425	MSTRG.12820.1	1	535	MSTRG.12820	.	0	0	2.42217	0.269241	0.841121	0.110569	2.80374	0.566364	9.98318	1.23933	0	0
23113	u	novel	-1.30384	-0.028672	chr15	-	114178304	114178710	MSTRG.12821.1	1	407	MSTRG.12821	.	11.7445	1.75262	0	0	0	0	2.2113	0.44669	0	0	0	0
23118	u	novel	-1.21865	-0.0004096	chr15	+	114250408	114251061	MSTRG.12824.1	1	654	MSTRG.12824	.	9.92813	1.48157	0	0	0	0	0	0	0	0	0	0
23119	u	novel	-1.013	-0.069632	chr15	+	114251835	114253066	MSTRG.12825.1	1	1232	MSTRG.12825	.	0	0	0	0	6.0763	0.798759	4.00649	0.809324	2.55682	0.317407	4.26705	0.701389
23120	u	novel	-1.20642	-0.077824	chr15	+	114253320	114255542	MSTRG.12826.1	1	2223	MSTRG.12826	.	9.82501	1.46618	0	0	0	0	0	0	0.849344	0.105439	0	0
23121	u	novel	-1.20187	-0.0004096	chr15	+	114255865	114256753	MSTRG.12827.1	1	889	MSTRG.12827	.	14.5287	2.16811	0	0	7.5928	0.998111	2.86839	0.579424	0	0	0	0
23122	u	novel	-1.26863	-0.0004096	chr15	+	114258123	114258411	MSTRG.12828.1	1	289	MSTRG.12828	.	10.9723	1.63739	0	0	0	0	0	0	0	0	0	0
23123	u	novel	-1.14626	-0.0004096	chr15	+	114258704	114259010	MSTRG.12829.1	1	307	MSTRG.12829	.	0	0	0	0	0	0	0	0	11.8893	1.47595	1.47557	0.242544
2291	u	novel	-1.25949	-0.036864	chr1	-	132807728	132808506	MSTRG.1283.1	1	779	MSTRG.1283	.	13.5584	2.02332	0	0	0	0	0	0	0	0	0	0
23126	u	novel	-1.20838	-0.0004096	chr15	-	114813093	114813370	MSTRG.12831.1	1	278	MSTRG.12831	.	11.8633	1.77036	0	0	4.31655	0.567431	1.07914	0.217989	0	0	2.16187	0.355354
23127	u	novel	-1.15217	-0.0004096	chr15	-	114813815	114814088	MSTRG.12832.1	1	274	MSTRG.12832	.	10.4708	1.56255	0	0	0	0	1.09489	0.221171	3.28467	0.407764	2.68248	0.440929
23156	i	novel	-1.31117	-0.004096	chr15	-	115369881	115370472	MSTRG.12838.1	1	592	MSTRG.12838	ENSSSCG00000016091	0.255068	0.038064	0	0	0	0	1.77365	0.358283	0	0	9.41892	1.54822
23138	u	novel	-1.16208	-0.0688128	chr15	+	115153382	115155638	MSTRG.12841.1	1	2257	MSTRG.12841	.	17.2796	2.57862	0	0	8.78982	1.15546	4.45281	0.899482	0	0	0	0
23141	u	novel	-1.36504	-0.0004096	chr15	+	115186042	115186294	MSTRG.12844.1	1	253	MSTRG.12844	.	0	0	0	0	0	0	0	0	0	0	8.8419	1.45337
23142	u	novel	-1.05003	-0.0004096	chr15	+	115186957	115187163	MSTRG.12845.1	1	207	MSTRG.12845	.	0	0	0	0	0	0	7.15942	1.44623	0	0	0	0
23144	u	novel	-1.06353	-0.0053248	chr15	+	115197173	115198806	MSTRG.12847.1	1	1634	MSTRG.12847	.	11.6285	1.73532	0	0	0	0	0	0	0	0	0	0
23146	u	novel	-1.1661	-0.0004096	chr15	+	115200324	115201299	MSTRG.12849.1	1	976	MSTRG.12849	.	10.1066	1.5082	0	0	0	0	0	0	0	0	0	0
23148	u	novel	-1.27112	-0.0139264	chr15	+	115207799	115208093	MSTRG.12851.1	1	295	MSTRG.12851	.	18.3186	2.73368	0	0	0	0	0	0	0	0	0	0
23150	u	novel	-1.30796	-0.131072	chr15	+	115212640	115212926	MSTRG.12853.1	1	287	MSTRG.12853	.	11.0348	1.64672	0	0	0	0	4.70383	0.950189	5.50523	0.683427	3.08711	0.507438
23172	u	novel	-1.19535	-0.0540672	chr15	-	115711208	115711461	MSTRG.12858.1	1	254	MSTRG.12858	.	10.1063	1.50816	0	0	0	0	0	0	0	0	0	0
23178	u	novel	-1.09051	-0.024576	chr15	-	115729758	115731451	MSTRG.12861.1	1	1694	MSTRG.12861	.	9.29516	1.38711	0	0	0	0	0	0	0	0	0	0
23186	u	novel	-1.12278	-0.045056	chr15	+	115956161	115957977	MSTRG.12868.1	1	1817	MSTRG.12868	.	76.8976	11.4754	86.6032	9.62653	82.7441	10.8771	44.5432	8.99786	66.1381	8.21049	59.5509	9.78859
23195	u	novel	-1.27922	-0.034816	chr15	-	116012254	116012568	MSTRG.12874.1	1	315	MSTRG.12874	.	0	0	2.36825	0.263247	10.4667	1.3759	3.6	0.727211	0	0	0	0
23196	u	novel	-1.26426	-0.180224	chr15	-	116013349	116013779	MSTRG.12875.1	1	431	MSTRG.12875	.	5.95592	0.888799	0	0	0	0	0	0	0	0	8.73782	1.43626
23208	u	novel	-1.01015	-0.073728	chr15	-	116101762	116102110	MSTRG.12879.1	1	349	MSTRG.12879	.	0	0	0	0	0	0	0	0	0	0	8.58453	1.41107
2297	i	novel	-1.06106	-0.0004096	chr1	+	132930926	132931758	MSTRG.1288.1	1	833	MSTRG.1288	LEO1	0	0	0	0	0	0	0	0	0	0	9.2413	1.51902
23219	u	novel	-1.0691	-0.585728	chr15	+	116211709	116213687	MSTRG.12882.1	1	1979	MSTRG.12882	.	19.9302	2.97417	27.5164	3.05864	24.5841	3.2317	22.3552	4.51583	37.9909	4.71625	28.9808	4.76367
23224	i	novel	-1.34914	-0.0004096	chr15	+	116336062	116336304	MSTRG.12886.1	1	243	MSTRG.12886	ENSSSCG00000028157	0	0	9.97333	1.1086	0	0	8.56379	1.72991	0	0	13.6708	2.24711
23229	u	novel	-1.17994	-0.08192	chr15	-	116462014	116462382	MSTRG.12888.1	1	369	MSTRG.12888	.	9.41192	1.40454	0	0	0	0	3.2439	0.655278	0	0	0	0
2305	u	novel	-1.08221	-0.294912	chr1	-	133012902	133013338	MSTRG.1289.1	1	437	MSTRG.1289	.	10.6568	1.5903	0	0	4.46224	0.586584	0	0	0.686499	0.085223	7.33638	1.20591
23240	u	novel	-1.48824	-0.0004096	chr15	-	116757572	116758068	MSTRG.12893.1	1	497	MSTRG.12893	.	11.161	1.66555	0	0	0	0	0	0	0	0	5.77264	0.948868
23243	u	novel	-1.27349	-0.659456	chr15	+	116828969	116829254	MSTRG.12896.1	1	286	MSTRG.12896	.	0	0	0	0	0.513986	0.067566	0	0	0	0	8.32867	1.36901
23245	u	novel	-1.08724	-0.114688	chr15	-	116869722	116869955	MSTRG.12898.1	1	234	MSTRG.12898	.	56.8761	8.48759	98.0171	10.8953	64.7436	8.51086	29.8034	6.02038	90.0299	11.1764	80.5726	13.244
23247	u	novel	-1.06634	-0.0352256	chr15	+	117062819	117063071	MSTRG.12899.1	1	253	MSTRG.12899	.	10.0356	1.49761	0	0	0	0	0.592885	0.119765	0	0	0	0
23253	u	novel	-1.26079	-0.1024	chr15	-	117237463	117239763	MSTRG.12902.1	1	2301	MSTRG.12902	.	143.66	21.4383	94.1573	10.4662	107.39	14.1169	63.7605	12.8798	95.4026	11.8434	74.1554	12.1892
23275	u	novel	-1.38114	-0.0004096	chr15	+	117860377	117860734	MSTRG.12911.1	1	358	MSTRG.12911	.	7.17039	1.07004	0	0	12.8101	1.68394	3.34357	0.675412	0	0	0	0
2306	u	novel	-1.2565	-0.0806912	chr1	-	133077273	133077703	MSTRG.1292.1	1	431	MSTRG.1292	.	0	0	0	0	0	0	0	0	0	0	8.39907	1.38058
23288	u	novel	-1.10544	-0.0237568	chr15	+	118226125	118228476	MSTRG.12920.1	1	2352	MSTRG.12920	.	9.93325	1.48233	13.9005	1.54513	10.4154	1.36915	12.2343	2.47136	13.1412	1.63136	11.8082	1.94096
23321	u	novel	-1.21434	-0.012288	chr15	+	120801077	120801313	MSTRG.12925.1	1	237	MSTRG.12925	.	26.6329	3.97442	51.0422	5.67368	0	0	34.0084	6.86981	0	0	61.5063	10.11
23327	u	novel	-1.15206	-0.032768	chr15	+	120930969	120931446	MSTRG.12926.1	1	478	MSTRG.12926	.	0	0	0	0	0	0	0	0	0	0	10.0126	1.6458
23326	u	novel	-1.16261	-0.0004096	chr15	+	120925453	120925782	MSTRG.12928.1	1	330	MSTRG.12928	.	11.8788	1.77267	0	0	0	0	0	0	0	0	0	0
23328	u	novel	-1.18119	-0.045056	chr15	+	120944934	120945217	MSTRG.12929.1	1	284	MSTRG.12929	.	9.57042	1.42819	0	0	0	0	0	0	0	0	0	0
23329	u	novel	-1.33189	-0.0004096	chr15	-	120956251	120956507	MSTRG.12930.1	1	257	MSTRG.12930	.	18.7121	2.79239	0	0	1.16732	0.153449	1.16732	0.235801	0	0	0	0
23350	u	novel	-1.20357	-0.01024	chr15	-	121901735	121902658	MSTRG.12938.1	1	924	MSTRG.12938	.	0	0	2.39774	0.266525	4.51732	0.593823	3.75541	0.758604	0	0	12.9232	2.12422
23354	u	novel	-1.24973	-0.0856064	chr15	-	121954360	121954581	MSTRG.12940.1	1	222	MSTRG.12940	.	0	0	3.15315	0.350494	6.74324	0.886432	5.40541	1.09191	10.7973	1.34039	2.70721	0.444993
23355	u	novel	-1.29625	-0.0004096	chr15	-	122058418	122058757	MSTRG.12942.1	1	340	MSTRG.12942	.	0	0	12.3529	1.37311	0	0	0	0	0	0	7.24412	1.19074
23356	u	novel	-1.07527	-0.077824	chr15	+	122159286	122159582	MSTRG.12943.1	1	297	MSTRG.12943	.	14.7441	2.20026	27.1919	3.02257	23.1111	3.03807	37.9327	7.66251	145.929	18.1159	64.9394	10.6743
23357	u	novel	-1.18983	-0.0004096	chr15	-	122228663	122229148	MSTRG.12945.1	1	486	MSTRG.12945	.	10.1564	1.51563	0	0	5.55556	0.730305	0	0	0	0	0	0
23359	u	novel	-1.20246	-0.0004096	chr15	-	122232466	122233236	MSTRG.12947.1	1	771	MSTRG.12947	.	0	0	0	0	0	0	7.3891	1.49262	0	0	0	0
23361	u	novel	-1.1362	-0.0094208	chr15	+	122250440	122254165	MSTRG.12949.1	2	2576	MSTRG.12949	.	14.656	2.18711	11.5921	1.28854	10.3532	1.36098	5.54791	1.1207	8.58284	1.06549	9.15373	1.50463
23371	u	novel	-1.42061	-0.0786432	chr15	-	122408320	122408591	MSTRG.12950.1	1	272	MSTRG.12950	.	10.5478	1.57404	2.20588	0.245199	0	0	0	0	0	0	0	0
23363	u	novel	-1.0736	-0.098304	chr15	-	122361764	122362067	MSTRG.12951.1	1	304	MSTRG.12951	.	9.4375	1.40836	0	0	0	0	1.97368	0.39869	0	0	0	0
23395	u	novel	-1.40643	-0.02048	chr15	-	123386303	123386546	MSTRG.12963.1	1	244	MSTRG.12963	.	46.3975	6.92389	26.3607	2.93016	33.7418	4.43553	28.6311	5.78358	32.7336	4.0636	44.3811	7.29508
23397	u	novel	-1.24079	-0.11264	chr15	-	124091139	124091368	MSTRG.12964.1	1	230	MSTRG.12964	.	9.1913	1.37162	20.4174	2.26953	9.13044	1.20024	2.6087	0.526965	7.56522	0.939157	3.93913	0.647488
23399	u	novel	-1.08101	-0.083968	chr15	+	124204252	124204496	MSTRG.12965.1	1	245	MSTRG.12965	.	61.5673	9.18767	59.3306	6.595	67.8653	8.92123	37.6449	7.60438	50.9184	6.32108	46.1755	7.59003
2312	u	novel	-1.11636	-0.0397312	chr1	+	133265870	133267067	MSTRG.1297.1	1	1198	MSTRG.1297	.	10.7679	1.6069	0	0	0	0	0.876461	0.177048	0	0	1.51252	0.248618
23420	u	novel	-1.10252	-0.0004096	chr15	-	124987501	124987808	MSTRG.12975.1	1	308	MSTRG.12975	.	0.980519	0.146322	0	0	0	0	0	0	4.38312	0.544127	9.80519	1.61171
23421	u	novel	-1.1712	-0.0004096	chr15	+	124998351	125000357	MSTRG.12976.1	1	2007	MSTRG.12976	.	5.76881	0.860877	7.78675	0.865549	8.44395	1.11	0	0	10.7778	1.33797	7.92725	1.30303
23429	u	novel	-1.33597	-0.0004096	chr15	-	127678635	127679263	MSTRG.12979.1	1	629	MSTRG.12979	.	0	0	25.3911	2.82239	0	0	6.10175	1.23257	12.8776	1.59864	0	0
23432	u	novel	-1.39813	-0.0004096	chr15	-	127749308	127749675	MSTRG.12981.1	1	368	MSTRG.12981	.	10.2582	1.53082	0	0	0	0	0.815217	0.164676	0	0	0	0
23433	u	novel	-1.47797	-0.045056	chr15	-	127753642	127754390	MSTRG.12982.1	1	749	MSTRG.12982	.	17.8625	2.66561	0	0	0	0	0	0	2.4032	0.298337	3.02403	0.49707
23434	u	novel	-1.24528	-0.0004096	chr15	-	127762308	127762746	MSTRG.12983.1	1	439	MSTRG.12983	.	14.1913	2.11777	5.12528	0.56971	0	0	0	0	0	0	2.69248	0.442573
23435	u	novel	-1.12296	-0.0004096	chr15	-	127769614	127770209	MSTRG.12984.1	1	596	MSTRG.12984	.	14.6946	2.19287	0	0	0	0	0	0	2.51678	0.312437	1.01342	0.16658
23436	u	novel	-1.23775	-0.004096	chr15	-	127771819	127773526	MSTRG.12985.1	1	1708	MSTRG.12985	.	9.68852	1.44582	0	0	0	0	0	0	0	0	0	0
23444	u	novel	-1.10668	-0.053248	chr15	-	127796307	127798608	MSTRG.12986.1	1	2302	MSTRG.12986	.	15.0004	2.23851	0	0	9.26325	1.2177	0	0	0	0	0	0
23438	u	novel	-1.40833	-0.0004096	chr15	-	127778363	127779260	MSTRG.12988.1	1	898	MSTRG.12988	.	10.7339	1.60181	0	0	0	0	0	0	0	0	5.0412	0.82864
23439	u	novel	-1.17534	-0.0589824	chr15	-	127779758	127781546	MSTRG.12989.1	1	1789	MSTRG.12989	.	0	0	0	0	8.75522	1.15092	0	0	0	0	0	0
23440	u	novel	-1.06353	-0.0004096	chr15	-	127781896	127783595	MSTRG.12990.1	1	1700	MSTRG.12990	.	12.3312	1.84018	0	0	0	0	0	0	3.79176	0.470715	1.94706	0.320045
23441	u	novel	-1.23276	-0.086016	chr15	-	127783981	127785174	MSTRG.12991.1	1	1194	MSTRG.12991	.	13.4054	2.00048	0	0	0	0	0	0	0	0	0	0
23442	u	novel	-1.07034	-0.004096	chr15	-	127788811	127789137	MSTRG.12992.1	1	327	MSTRG.12992	.	11.0826	1.65385	0	0	0	0	4.12844	0.833957	2.75229	0.341674	6.92661	1.13855
23443	u	novel	-1.39753	-0.0004096	chr15	-	127792836	127793745	MSTRG.12993.1	1	910	MSTRG.12993	.	11.2516	1.67908	0	0	0	0	0	0	0	0	3.58877	0.589899
23445	u	novel	-1.34705	-0.110592	chr15	-	127799482	127801209	MSTRG.12994.1	1	1728	MSTRG.12994	.	10.717	1.5993	0	0	0	0	2.0816	0.420489	0	0	0	0
23446	u	novel	-1.34052	-0.0004096	chr15	-	127804089	127805168	MSTRG.12995.1	1	1080	MSTRG.12995	.	12.5676	1.87546	0	0	0	0	2.5	0.505008	0	0	0	0
23447	u	novel	-1.32602	-0.02048	chr15	-	127805471	127808599	MSTRG.12996.1	1	3129	MSTRG.12996	.	16.582	2.47452	0	0	0	0	4.33652	0.875991	4.24864	0.527433	0	0
23448	u	novel	-1.15408	-0.086016	chr15	-	127808905	127815689	MSTRG.12997.1	1	6785	MSTRG.12997	.	0	0	0	0	0	0	3.28637	0.663856	0	0	0	0
23449	u	novel	-1.15071	-0.049152	chr15	-	127870073	127891325	MSTRG.12998.1	1	21253	MSTRG.12998	.	16.0308	2.39227	0	0	6.56147	0.862538	2.2339	0.451254	4.47838	0.555953	2.94548	0.484159
253	i	novel	-1.27047	-0.0004096	chr1	-	15698331	15698559	MSTRG.130.1	1	229	MSTRG.130	MTRF1L	0	0	0	0	0	0	0	0	0	0	9.89083	1.62579
23454	u	novel	-1.18703	-0.073728	chr15	+	128188272	128188536	MSTRG.13000.1	1	265	MSTRG.13000	.	0	0	0	0	0	0	6.79245	1.3721	0	0	0	0
23467	u	novel	-1.31712	-0.0503808	chr15	+	130320669	130320961	MSTRG.13004.1	1	293	MSTRG.13004	.	0	0	0	0	0	0	8.19113	1.65463	0	0	11.8532	1.94836
23476	u	novel	-1.09492	-0.0004096	chr15	+	130436006	130436401	MSTRG.13007.1	1	396	MSTRG.13007	.	4.57576	0.682839	0	0	0	0	0	0	11.7424	1.45772	6.00253	0.986655
23477	u	novel	-1.05592	-0.049152	chr15	+	130437023	130437302	MSTRG.13008.1	1	280	MSTRG.13008	.	0	0	12.8	1.42281	0	0	0	0	3.17857	0.394593	0	0
23478	u	novel	-1.07461	-0.08192	chr15	-	130437736	130438022	MSTRG.13009.1	1	287	MSTRG.13009	.	10.4669	1.56197	8.88502	0.98763	9.40766	1.23668	9.40766	1.90038	11.4983	1.42741	11.5749	1.90261
2324	u	novel	-1.01291	-0.0004096	chr1	-	134276118	134276398	MSTRG.1301.1	1	281	MSTRG.1301	.	12.8327	1.91502	0	0	0	0	0	0	0	0	0	0
23479	u	novel	-1.17036	-0.0278528	chr15	+	130494118	130494396	MSTRG.13011.1	1	279	MSTRG.13011	.	45.724	6.82338	55.3907	6.15705	44.5842	5.86081	46.1577	9.324	0	0	60.2939	9.91071
23482	u	novel	-1.03723	-0.0135168	chr15	-	130956153	130957498	MSTRG.13013.1	1	1346	MSTRG.13013	.	58.7192	8.76264	77.5712	8.62256	63.1789	8.30518	23.3782	4.72246	36.51	4.53241	34.9751	5.74898
23483	u	novel	-1.39327	-0.0004096	chr15	+	130981334	130981603	MSTRG.13014.1	1	270	MSTRG.13014	.	16.2185	2.42028	0	0	0	0	0	0	0	0	0	0
23484	u	novel	-1.20752	-0.221184	chr15	+	130996630	130996908	MSTRG.13015.1	1	279	MSTRG.13015	.	17.319	2.58451	0	0	3.22581	0.424048	0.537634	0.108604	0	0	0	0
23485	u	novel	-1.11327	-0.0004096	chr15	+	130998402	130998772	MSTRG.13016.1	1	371	MSTRG.13016	.	0	0	11.5148	1.27995	0	0	0	0	1.61725	0.200768	1.22102	0.200704
23486	u	novel	-1.23676	-0.008192	chr15	+	131009706	131010194	MSTRG.13017.1	1	489	MSTRG.13017	.	9.22699	1.37694	0	0	0	0	0	0	0	0	0	0
2325	u	novel	-1.13328	-0.0004096	chr1	-	134277185	134277691	MSTRG.1302.1	1	507	MSTRG.1302	.	14.5759	2.17516	0	0	0	0	2.36686	0.478114	0	0	0	0
23497	i	novel	-1.19691	-0.08192	chr15	-	131419646	131419901	MSTRG.13025.1	1	256	MSTRG.13025	MARCH4	10.4297	1.55642	16.3125	1.81324	16.5078	2.17003	4.67578	0.944522	18.6914	2.32038	11.0664	1.81902
23500	u	novel	-1.10305	-0.0151552	chr15	+	131559380	131562200	MSTRG.13028.1	1	2821	MSTRG.13028	.	12.1737	1.81668	22.2737	2.47587	16.9833	2.23254	22.7398	4.59351	22.9826	2.8531	26.3935	4.33839
23502	u	novel	-1.03719	-0.0004096	chr15	-	131568042	131569992	MSTRG.13030.1	1	1951	MSTRG.13030	.	17.96	2.68017	24.0041	2.66822	18.3275	2.40924	26.858	5.4254	26.4849	3.28787	30.0477	4.93904
23524	x	novel	-1.25429	-0.114688	chr15	+	133376912	133377460	MSTRG.13040.1	1	549	MSTRG.13040	ARPC2	0	0	20.3607	2.26322	20.4426	2.68728	3.63388	0.734055	15.6648	1.94466	11.1257	1.82877
23530	u	novel	-1.1362	-0.520192	chr15	+	133423202	133424961	MSTRG.13045.1	1	1760	MSTRG.13045	.	11.0324	1.64636	10.9778	1.22026	8.27074	1.08723	4.81449	0.972541	10.2423	1.2715	8.44148	1.38755
23538	u	novel	-1.08257	-0.079872	chr15	-	133436704	133438832	MSTRG.13046.1	1	2129	MSTRG.13046	.	7.41287	1.10622	12.8328	1.42645	10.5444	1.38611	6.90465	1.39476	10.9601	1.3606	10.1517	1.66867
23577	u	novel	-1.20261	-0.0004096	chr15	-	133858940	133859470	MSTRG.13062.1	1	531	MSTRG.13062	.	10.9473	1.63366	0	0	0	0	0	0	0	0	0.853107	0.140228
23580	u	novel	-1.11569	-0.0004096	chr15	-	133951390	133951723	MSTRG.13064.1	1	334	MSTRG.13064	.	0	0	0	0	0	0	0	0	0	0	8.10778	1.3327
23561	i	novel	-1.31024	-0.016384	chr15	+	133764688	133764961	MSTRG.13067.1	1	274	MSTRG.13067	ENSSSCG00000026964	17.0109	2.53854	27.9088	3.10225	14.2336	1.87107	11.4963	2.3223	17.6679	2.19332	14.2774	2.34682
23563	x	novel	-1.22253	-0.151552	chr15	+	133770655	133773436	MSTRG.13069.1	2	2638	MSTRG.13069	ENSSSCG00000026964	8.75824	1.30699	13.9126	1.54648	9.17872	1.20659	3.44555	0.696012	3.77008	0.468024	4.85675	0.79832
23628	i	novel	-1.26474	-0.012288	chr15	-	134367447	134367683	MSTRG.13081.1	1	237	MSTRG.13081	PTPRN	16.5654	2.47205	12.4051	1.37891	3.79747	0.499196	6.32911	1.2785	6.32911	0.785706	6.37131	1.04727
2337	u	novel	-1.38955	-0.0004096	chr1	+	134693200	134693429	MSTRG.1309.1	1	230	MSTRG.1309	.	0	0	0	0	0	0	6.52174	1.31741	0	0	1.31304	0.215829
23652	u	novel	-1.06354	-0.0118784	chr15	+	135538426	135575116	MSTRG.13106.1	2	3793	MSTRG.13106	.	2.27967	0.340195	1.77429	0.197225	0.804141	0.105708	7.6701	1.54938	7.60177	0.943695	5.46663	0.898569
23653	u	novel	-1.1324	-0.016384	chr15	+	135538471	135572422	MSTRG.13106.2	2	786	MSTRG.13106	.	0	0	0.04733	0.005261	0.016539	0.002174	4.81083	0.971803	10.3086	1.27973	0.100579	0.016533
23654	u	novel	-1.12362	-0.024576	chr15	+	135538478	135572406	MSTRG.13106.3	2	746	MSTRG.13106	.	0	0	0.174263	0.019371	0.751315	0.098764	0	0	0	0	0.460828	0.075748
23655	u	novel	-1.0339	-0.0090112	chr15	+	135539536	135544040	MSTRG.13107.1	1	4505	MSTRG.13107	.	5.56138	0.829922	5.20133	0.578163	4.29323	0.564366	6.97248	1.40846	21.8147	2.7081	2.60289	0.427845
23657	u	novel	-1.0959	-0.0401408	chr15	+	135549541	135554436	MSTRG.13109.1	1	4896	MSTRG.13109	.	2.73019	0.407425	5.46262	0.607207	3.64297	0.478887	8.27635	1.67185	20.1787	2.50502	8.94771	1.47077
23658	u	novel	-1.27226	-0.0004096	chr15	+	135575176	135576093	MSTRG.13110.1	1	918	MSTRG.13110	.	0	0	2.94118	0.326932	0.816993	0.107398	4.41176	0.89119	14.8268	1.84062	7.88889	1.29672
23660	u	novel	-1.13713	-0.0004096	chr15	+	135645030	135645248	MSTRG.13112.1	1	219	MSTRG.13112	.	0	0	0	0	0	0	10.9589	2.21373	0	0	0	0
23663	u	novel	-1.06884	-0.0004096	chr15	+	135927558	135927846	MSTRG.13113.1	1	289	MSTRG.13113	.	0	0	0	0	0	0	9.34256	1.88723	0	0	1.04498	0.171767
23667	u	novel	-1.43737	-0.0004096	chr15	+	137128108	137128326	MSTRG.13114.1	1	219	MSTRG.13114	.	11.032	1.6463	2.73973	0.304539	0	0	0	0	0	0	0	0
23668	u	novel	-1.00023	-0.0499712	chr15	+	137233299	137233613	MSTRG.13115.1	1	315	MSTRG.13115	.	13.9016	2.07453	0	0	0	0	0	0	0	0	0	0
23669	u	novel	-1.16804	-0.069632	chr15	+	137417808	137418056	MSTRG.13116.1	1	249	MSTRG.13116	.	11.5221	1.71944	0	0	0	0	7.78313	1.57222	0	0	1.80723	0.29706
23686	u	novel	-1.27053	-0.0004096	chr15	+	138647695	138647934	MSTRG.13122.1	1	240	MSTRG.13122	.	16.6542	2.48529	0	0	0	0	6.25	1.26252	0	0	0	0
23694	u	novel	-1.17756	-0.0004096	chr15	+	139117195	139117424	MSTRG.13124.1	1	230	MSTRG.13124	.	0	0	0	0	0	0	6.52174	1.31741	0	0	0	0
23690	u	novel	-1.33921	-0.0528384	chr15	+	139068477	139069190	MSTRG.13125.1	1	714	MSTRG.13125	.	14.3641	2.14356	16.1176	1.79158	12.3025	1.61723	12.1134	2.44695	16.2227	2.01391	16.8207	2.76488
23703	u	novel	-1.46526	-0.0004096	chr15	-	139620282	139620541	MSTRG.13132.1	1	260	MSTRG.13132	.	0	0	0	0	0	0	1.46696	0.29633	0	0	15.0692	2.47698
23707	u	novel	-1.40494	-0.08192	chr15	+	140862964	140863230	MSTRG.13134.1	1	267	MSTRG.13134	.	10.1648	1.51689	17.779	1.97626	0	0	10.1124	2.04273	12.9213	1.60408	0	0
23713	u	novel	-1.09586	-0.0241664	chr15	+	141914497	141915749	MSTRG.13135.1	1	1253	MSTRG.13135	.	19.2945	2.87931	21.5188	2.39195	0	0	9.99242	2.0185	32.3384	4.01454	15.2646	2.50909
23714	u	novel	-1.10339	-0.141312	chr15	+	141916263	141916608	MSTRG.13136.1	1	346	MSTRG.13136	.	5.4552	0.814078	0	0	14.7399	1.93763	7.90752	1.59734	0	0	0	0
23715	u	novel	-1.49793	-0.0004096	chr15	-	142006589	142006898	MSTRG.13137.1	1	310	MSTRG.13137	.	0	0	0	0	0	0	1.93548	0.390974	0	0	8.28064	1.36112
23716	u	novel	-1.22344	-0.0495616	chr15	-	142015429	142016668	MSTRG.13138.1	1	1240	MSTRG.13138	.	4.87016	0.726772	9.24436	1.02757	5.08064	0.667876	0	0	0	0	0	0
23723	u	novel	-1.12039	-0.0004096	chr15	+	142103562	142103887	MSTRG.13142.1	1	326	MSTRG.13142	.	0	0	1.29329	0.143758	0	0	0	0	0	0	8.59202	1.4123
23724	u	novel	-1.21349	-0.0004096	chr15	+	142105182	142105451	MSTRG.13143.1	1	270	MSTRG.13143	.	9.50741	1.41879	0.555556	0.061754	0	0	1.11111	0.224448	0	0	0	0
23725	u	novel	-1.1216	-0.0004096	chr15	+	142108478	142109267	MSTRG.13144.1	1	790	MSTRG.13144	.	5.92532	0.884233	0	0	0	0	1.47595	0.298146	5.87089	0.728821	0	0
23726	u	novel	-1.08636	-0.1024	chr15	+	142111706	142112399	MSTRG.13145.1	1	694	MSTRG.13145	.	0	0	0	0	0	0	5.33141	1.07696	0	0	11.9611	1.96609
23727	u	novel	-1.13002	-0.172032	chr15	+	142112804	142113165	MSTRG.13146.1	1	362	MSTRG.13146	.	0	0	0	0	0	0	7.45856	1.50665	0	0	0	0
23728	u	novel	-1.14555	-0.0004096	chr15	+	142113690	142114143	MSTRG.13147.1	1	454	MSTRG.13147	.	12.5022	1.8657	0	0	0	0	0	0	0	0	0	0
23729	u	novel	-1.04648	-0.0004096	chr15	+	142136575	142136784	MSTRG.13148.1	1	210	MSTRG.13148	.	10.8	1.61168	0	0	0	0	0	0	0	0	0	0
23730	u	novel	-1.1747	-0.049152	chr15	+	142146679	142151351	MSTRG.13149.1	1	4673	MSTRG.13149	.	11.9752	1.78705	13.22	1.46949	10.5924	1.39243	8.19591	1.6556	19.4592	2.4157	11.5132	1.89246
23733	u	novel	-1.2655	-0.053248	chr15	+	142254963	142255402	MSTRG.13152.1	1	440	MSTRG.13152	.	11.325	1.69003	0	0	0	0	0	0	0	0	0	0
23736	u	novel	-1.02964	-0.065536	chr15	-	142266034	142266416	MSTRG.13155.1	1	383	MSTRG.13155	.	14.0783	2.1009	0	0	0	0	0	0	0	0	0	0
23737	u	novel	-1.16639	-0.06144	chr15	+	142271652	142272591	MSTRG.13156.1	1	940	MSTRG.13156	.	9.31702	1.39038	0	0	4.41489	0.580359	0	0	9.4117	1.16838	6.56064	1.07839
23742	u	novel	-1.19154	-0.0909312	chr15	-	142541602	142541820	MSTRG.13158.1	1	219	MSTRG.13158	.	10.9224	1.62994	6.6484	0.739015	2.73973	0.36015	1.36986	0.276717	0	0	0	0
23745	u	novel	-1.25462	-0.0004096	chr15	+	142556923	142557334	MSTRG.13159.1	1	412	MSTRG.13159	.	16.0971	2.40216	0	0	0	0	0	0	0	0	0	0
23743	u	novel	-1.1741	-0.0004096	chr15	-	142551621	142552867	MSTRG.13160.1	1	1247	MSTRG.13160	.	18.9856	2.83321	11.5395	1.28269	13.3015	1.74855	0	0	8	0.993132	10.2029	1.67708
23744	u	novel	-1.21413	-0.0507904	chr15	-	142553420	142554738	MSTRG.13161.1	1	1319	MSTRG.13161	.	10.3889	1.55034	1.55944	0.173343	0	0	0	0	0	0	0	0
23754	u	novel	-1.24765	-0.057344	chr15	+	142715541	142717242	MSTRG.13165.1	1	1702	MSTRG.13165	.	9.39718	1.40234	13.2873	1.47697	10.8108	1.42113	0	0	10.7908	1.33959	12.5023	2.05505
23755	u	novel	-1.3776	-0.196608	chr15	+	142717711	142719992	MSTRG.13166.1	1	2282	MSTRG.13166	.	12.4202	1.85347	2.36167	0.262516	6.39525	0.840687	0	0	0	0	8.45399	1.38961
23756	u	novel	-1.32936	-0.032768	chr15	+	142726007	142727041	MSTRG.13167.1	1	1035	MSTRG.13167	.	9.75266	1.45538	0	0	0	0	0	0	0	0	0	0
23757	u	novel	-1.37946	-0.073728	chr15	+	142728179	142729338	MSTRG.13168.1	1	1160	MSTRG.13168	.	10.6741	1.5929	0	0	0	0	0	0	3.09108	0.383731	0	0
23759	u	novel	-1.28759	-0.016384	chr15	+	142736256	142739850	MSTRG.13170.1	1	3595	MSTRG.13170	.	12.8503	1.91765	0	0	0	0	0.145994	0.029491	5.2057	0.646244	0.943548	0.155094
23760	u	novel	-1.17242	-0.008192	chr15	+	142740861	142743607	MSTRG.13171.1	1	2747	MSTRG.13171	.	10.4343	1.5571	13.2144	1.46887	0	0	3.80706	0.769038	6.54969	0.813089	6.66727	1.09592
23768	u	novel	-1.01028	-0.086016	chr15	+	142910161	142910380	MSTRG.13174.1	1	220	MSTRG.13174	.	9.97727	1.4889	16.5727	1.84217	11.0682	1.45497	2.72727	0.550917	3.29091	0.408538	5.29545	0.870432
23769	u	novel	-1.27648	-0.0876544	chr15	+	142921851	142922946	MSTRG.13175.1	1	1096	MSTRG.13175	.	12.4453	1.8572	10.4562	1.16228	5.61735	0.738428	4.18704	0.845796	1.91606	0.237862	7.2646	1.19411
23781	u	novel	-1.50489	-0.113869	chr15	+	144713526	144713766	MSTRG.13180.1	1	241	MSTRG.13180	.	12.8008	1.91026	24.4232	2.71481	17.3527	2.2811	11.1535	2.25305	17.9627	2.22991	9.96681	1.63828
23817	u	novel	-1.09609	-0.0004096	chr15	+	145777092	145777516	MSTRG.13191.1	1	425	MSTRG.13191	.	9.15294	1.36589	0	0	0	0	1.05882	0.213886	0	0	0	0
23827	x	novel	-1.28208	-0.0004096	chr15	-	145944857	145945084	MSTRG.13199.1	1	228	MSTRG.13199	ENSSSCG00000016275	0	0	0	0	14.1579	1.86112	0.640351	0.129353	5.22807	0.64902	9.82456	1.6149
255	u	novel	-1.28096	-0.004096	chr1	-	15716207	15717338	MSTRG.132.1	1	1132	MSTRG.132	.	0	0	16.6564	1.85147	0	0	2.96025	0.597979	0	0	0	0
23836	u	novel	-1.03086	-0.0004096	chr15	-	146177682	146177929	MSTRG.13206.1	1	248	MSTRG.13206	.	0	0	0	0	0	0	0	0	0	0	14.6129	2.40197
23841	u	novel	-1.33308	-0.0135168	chr15	-	146335024	146335320	MSTRG.13207.1	1	297	MSTRG.13207	.	22.3704	3.33832	15.5623	1.72985	13.6263	1.79124	4.54545	0.918196	9.44613	1.17266	8.13468	1.33712
23840	i	novel	-1.0812	-0.036864	chr15	+	146205797	146206985	MSTRG.13209.1	1	1189	MSTRG.13209	ENSSSCG00000022392	9.77376	1.45853	0	0	0	0	0	0	9.95963	1.2364	0	0
23851	u	novel	-1.26256	-0.0004096	chr15	-	146761301	146761649	MSTRG.13214.1	1	349	MSTRG.13214	.	10.384	1.54959	0	0	0	0	0	0	0	0	0	0
23868	i	novel	-1.38615	-0.120013	chr15	+	147103666	147103932	MSTRG.13218.1	1	267	MSTRG.13218	EFHD1	7.90262	1.17931	12.3596	1.37385	9.21348	1.21116	3.37079	0.680909	3.66292	0.454721	6.22097	1.02256
23869	i	novel	-1.40384	-0.292864	chr15	-	147107356	147107605	MSTRG.13219.1	1	250	MSTRG.13219	EFHD1	25.304	3.77611	9.51	1.0571	18.576	2.44191	6.552	1.32352	14.388	1.78615	12.819	2.1071
23870	u	novel	-1.2378	-0.117555	chr15	+	147133977	147135575	MSTRG.13223.1	1	1599	MSTRG.13223	.	8.73608	1.30368	14.6423	1.62759	11.5566	1.51917	7.04941	1.424	7.9656	0.988862	7.54284	1.23984
23871	u	novel	-1.31888	-0.647168	chr15	-	147136536	147136902	MSTRG.13224.1	1	367	MSTRG.13224	.	9.85014	1.46993	3.26158	0.362547	0	0	1.6267	0.328599	4.86376	0.603794	4.93733	0.811566
23872	u	novel	-1.25868	-0.036864	chr15	-	147140975	147141299	MSTRG.13225.1	1	325	MSTRG.13225	.	0	0	13.8369	1.53807	0	0	2.30769	0.466161	0	0	0	0
2372	u	novel	-1.31667	-0.0229376	chr1	+	136408339	136409314	MSTRG.1323.1	1	976	MSTRG.1323	.	5.10553	0.761897	0	0	0	0	4.91803	0.993458	0	0	7.22009	1.18679
23879	u	novel	-1.12545	-0.004096	chr15	+	147199237	147229958	MSTRG.13230.1	2	9767	MSTRG.13230	.	2.33429	0.348346	16.5329	1.83774	13.6487	1.79419	1.01403	0.204837	4.987	0.619093	10.6152	1.74485
23884	u	novel	-1.13361	-0.18391	chr15	+	147572271	147572482	MSTRG.13231.1	1	212	MSTRG.13231	.	12.6698	1.89071	0.707547	0.078649	0	0	1.40094	0.282995	0	0	0	0
23894	u	novel	-1.32416	-0.17367	chr15	+	147856356	147856597	MSTRG.13235.1	1	242	MSTRG.13235	.	13.1033	1.9554	0	0	0	0	4.33884	0.876459	0	0	0	0
23902	u	novel	-1.03581	-0.036864	chr15	+	148010591	148011076	MSTRG.13240.1	1	486	MSTRG.13240	.	6.21399	0.927312	12.428	1.38145	8.53189	1.12156	5.55556	1.12224	3.39506	0.421468	10.6142	1.74469
23904	u	novel	-1.06172	-0.0503808	chr15	-	148042885	148043256	MSTRG.13242.1	1	372	MSTRG.13242	.	10.5753	1.57814	26.1667	2.9086	28.2231	3.71007	10.8817	2.19814	18.0618	2.24222	9.74731	1.6022
23905	u	novel	-1.14457	-0.109363	chr15	-	148043665	148043906	MSTRG.13243.1	1	242	MSTRG.13243	.	12.4132	1.85242	0	0	0	0	6.19835	1.25208	0.619835	0.076947	0	0
23909	u	novel	-1.39658	-0.104038	chr15	-	148086739	148086969	MSTRG.13245.1	1	231	MSTRG.13245	.	0	0	14.1645	1.57448	0	0	0	0	2.5974	0.322446	1.14286	0.187855
23929	u	novel	-1.30802	-0.028672	chr15	+	148489828	148490333	MSTRG.13248.1	1	506	MSTRG.13248	.	10.0435	1.49878	0	0	6.52174	0.857314	0	0	1.92688	0.239205	0	0
2374	u	novel	-1.19371	-0.147456	chr1	+	136412193	136412758	MSTRG.1325.1	1	566	MSTRG.1325	.	11.2314	1.67606	0	0	0	0	0	0	0	0	0	0
23948	u	novel	-1.15067	-0.111002	chr15	+	149489062	149489311	MSTRG.13258.1	1	250	MSTRG.13258	.	38.532	5.75012	68.384	7.60134	57.576	7.56865	37.076	7.48947	56.6	7.02641	37.2	6.11469
23950	i	novel	-1.11672	-0.053248	chr15	+	149883169	149883395	MSTRG.13260.1	1	227	MSTRG.13260	ENSSSCG00000024859	0	0	0	0	0	0	3.96476	0.800893	12.5551	1.55861	0	0
23952	i	novel	-1.42194	-0.04096	chr15	+	149945089	149945664	MSTRG.13262.1	1	576	MSTRG.13262	ENSSSCG00000024859	4.19444	0.625935	0	0	0	0	0.78125	0.157815	11.7188	1.45478	0	0
23956	u	novel	-1.24767	-0.014336	chr15	-	150132743	150133016	MSTRG.13265.1	1	274	MSTRG.13265	.	0	0	0	0	0	0	0	0	0	0	9.36861	1.53995
23961	u	novel	-1.0547	-0.094208	chr15	+	150433830	150434132	MSTRG.13268.1	1	303	MSTRG.13268	.	0	0	0	0	0	0	6.93069	1.40002	0	0	0	0
2365	x	novel	-1.21305	-0.0004096	chr1	-	136318584	136319038	MSTRG.1327.1	1	455	MSTRG.1327	COPS2	10.6	1.58183	0	0	0	0	0	0	6.8044	0.844708	0	0
23975	u	novel	-1.12815	-0.0507904	chr15	+	151692425	151710285	MSTRG.13274.1	1	17861	MSTRG.13274	.	8.06898	1.20413	19.5118	2.16887	12.893	1.69485	6.36336	1.28542	12.1895	1.51323	10.21	1.67825
23977	u	novel	-1.03478	-0.0364544	chr15	+	151718090	151723519	MSTRG.13276.1	1	5430	MSTRG.13276	.	6.99908	1.04447	0	0	0	0	3.11676	0.629595	0	0	0	0
23978	u	novel	-1.15807	-0.024576	chr15	+	151725144	151725575	MSTRG.13277.1	1	432	MSTRG.13277	.	0	0	0	0	0	0	7.29167	1.47294	0	0	0	0
23979	u	novel	-1.07601	-0.0425984	chr15	+	151728885	151730680	MSTRG.13278.1	1	1796	MSTRG.13278	.	0	0	12.7473	1.41695	0	0	2.60536	0.526291	0	0	0	0
23980	u	novel	-1.20249	-0.0475136	chr15	+	151731518	151732410	MSTRG.13279.1	1	893	MSTRG.13279	.	10.1366	1.51268	0	0	0	0	0	0	0	0	0	0
2367	i	novel	-1.15693	-0.0004096	chr1	+	136323910	136324277	MSTRG.1329.1	1	368	MSTRG.1329	COPS2	12.3098	1.83698	0	0	0	0	0	0	3.15217	0.391316	0	0
24008	i	novel	-1.31336	-0.24576	chr15	+	152144239	152144488	MSTRG.13291.1	1	250	MSTRG.13291	ENSSSCG00000016337	27.58	4.11575	45.736	5.08387	23.528	3.09287	27.56	5.5672	51.438	6.38559	42.746	7.02631
24012	u	novel	-1.10035	-0.0761856	chr15	-	152219915	152221807	MSTRG.13295.1	1	1893	MSTRG.13295	.	22.9773	3.42889	26.1696	2.90892	28.0069	3.68164	24.1606	4.88051	43.8473	5.44327	30.3539	4.98938
24016	i	novel	-1.31336	-0.24576	chr15	-	152254461	152254710	MSTRG.13298.1	1	250	MSTRG.13298	ENSSSCG00000020996	27.58	4.11575	45.736	5.08387	23.528	3.09287	27.56	5.5672	51.438	6.38559	42.746	7.02631
24018	u	novel	-1.40857	-0.0397312	chr15	+	152304431	152304653	MSTRG.13299.1	1	223	MSTRG.13299	.	9.47982	1.41467	0	0	0	0	0	0	0	0	0	0
24025	u	novel	-1.00309	-0.0028672	chr15	-	152428680	152429419	MSTRG.13304.1	1	740	MSTRG.13304	.	7.71892	1.15189	0	0	0	0	5.47297	1.10556	0	0	0	0
24029	i	novel	-1.15033	-0.028672	chr15	+	152591628	152591863	MSTRG.13307.1	1	236	MSTRG.13307	TWIST2	10.2373	1.52771	0	0	0	0	0	0	0	0	0	0
24033	u	novel	-1.20707	-0.0393216	chr15	-	153135455	153135850	MSTRG.13309.1	1	396	MSTRG.13309	.	0	0	0	0	0	0	6.62879	1.33903	0	0	0	0
24045	u	novel	-1.04231	-0.06144	chr15	-	153315078	153315323	MSTRG.13315.1	1	246	MSTRG.13315	.	0.613821	0.0916	0	0	0	0	1.21951	0.246345	11.5854	1.43823	0	0
24046	u	novel	-1.20429	-0.075776	chr15	-	153321916	153322124	MSTRG.13316.1	1	209	MSTRG.13316	.	18.0622	2.69542	0	0	0	0	0	0	0	0	0	0
24047	u	novel	-1.11202	-0.0618496	chr15	-	153322509	153322805	MSTRG.13317.1	1	297	MSTRG.13317	.	19.3199	2.8831	0	0	0	0	0	0	0	0	0	0
24048	u	novel	-1.08959	-0.08192	chr15	-	153333498	153334674	MSTRG.13318.1	1	1177	MSTRG.13318	.	8.21071	1.22528	14.4053	1.60124	0	0	0	0	7.25404	0.900527	2.78165	0.457229
24049	u	novel	-1.45233	-0.026624	chr15	-	153336094	153336481	MSTRG.13319.1	1	388	MSTRG.13319	.	0	0	0	0	10.817	1.42195	0	0	0	0	0	0
2380	i	novel	-1.29853	-0.02048	chr1	-	136672456	136672664	MSTRG.1332.1	1	209	MSTRG.1332	SHC4	0	0	0	0	0	0	6.45933	1.3048	0	0	20.0287	3.29219
24085	u	novel	-1.06043	-0.0147456	chr15	+	154743220	154743560	MSTRG.13329.1	1	341	MSTRG.13329	.	13.1085	1.95618	12.7478	1.417	0	0	0	0	0	0	0	0
24089	i	novel	-1.32656	-0.02048	chr15	-	154751612	154751925	MSTRG.13333.1	1	314	MSTRG.13333	ENSSSCG00000016368	0	0	0	0	0	0	8.12102	1.64047	0	0	0	0
24101	u	novel	-1.05893	-0.065536	chr15	-	154849402	154849874	MSTRG.13345.1	1	473	MSTRG.13345	.	10.8541	1.61976	0	0	0	0	0	0	4.18541	0.519584	0	0
24104	x	novel	-1.04789	-0.0606208	chr15	-	154991332	154992395	MSTRG.13348.1	1	1064	MSTRG.13348	SNED1	3.40602	0.508278	0	0	4.07143	0.535209	0	0	0	0	8.27632	1.36041
2385	i	novel	-1.16865	-0.0004096	chr1	+	136733180	136733481	MSTRG.1335.1	1	302	MSTRG.1335	CEP152	19.8742	2.96582	0	0	0	0	0	0	7.9106	0.982033	10.851	1.78361
24122	u	novel	-1.25981	-0.024576	chr15	+	155268390	155268632	MSTRG.13353.1	1	243	MSTRG.13353	.	29.1646	4.35222	44.856	4.98604	36.7284	4.82813	12.6173	2.54873	40.2181	4.99274	27.2922	4.48611
24144	u	novel	-1.00035	-0.034816	chr15	-	157111739	157111947	MSTRG.13359.1	1	209	MSTRG.13359	.	4.33493	0.6469	5.74163	0.638221	11.4833	1.50953	1.43541	0.289957	0	0	0	0
24150	u	novel	-1.22407	-0.0004096	chr15	+	157430697	157430972	MSTRG.13362.1	1	276	MSTRG.13362	.	0	0	0	0	11.9457	1.57031	0	0	0	0	0	0
24160	u	novel	-1.15401	-0.110182	chr16	-	6444	16003	MSTRG.13366.1	2	3102	MSTRG.13366	.	60.0643	8.96337	44.0373	4.89505	67.6571	8.89385	11.0462	2.23136	34.0217	4.22351	49.7616	8.17949
24161	u	novel	-1.20786	-0.129843	chr16	-	11924	15733	MSTRG.13366.2	2	3615	MSTRG.13366	.	8.47091	1.26411	45.2379	5.0285	6.41399	0.843151	10.2367	2.06785	29.3428	3.64266	4.03261	0.662854
24155	u	novel	-1.16508	-0.036864	chr15	+	157459580	157461590	MSTRG.13367.1	1	2011	MSTRG.13367	.	9.63998	1.43857	8.9279	0.992396	6.70612	0.881552	3.28195	0.662964	0	0	8.33565	1.37016
24152	u	novel	-1.04963	-0.0413696	chr15	+	157445299	157449608	MSTRG.13368.1	1	4310	MSTRG.13368	.	12.1183	1.80841	10.4297	1.15933	7.86817	1.03431	2.55143	0.515397	0	0	4.62336	0.759957
24153	u	novel	-1.0584	-0.094208	chr15	+	157445312	157446939	MSTRG.13368.2	2	1164	MSTRG.13368	.	0	0	0	0	0	0	0.198454	0.040088	0	0	0.167526	0.027537
24154	u	novel	-1.03296	-0.0892928	chr15	+	157449901	157450197	MSTRG.13369.1	1	297	MSTRG.13369	.	3.0505	0.455226	0	0	0	0	0	0	0	0	12.0539	1.98134
2388	x	novel	-1.0595	-0.045056	chr1	-	137267498	137267888	MSTRG.1337.1	1	391	MSTRG.1337	FBN1	0	0	0	0	1.53453	0.201721	7.67263	1.5499	0	0	0	0
24171	u	novel	-1.05775	-0.126976	chr16	-	3514595	3514823	MSTRG.13372.1	1	229	MSTRG.13372	.	7.91266	1.1808	0	0	0	0	0	0	0	0	0	0
24173	u	novel	-1.36858	-0.0004096	chr16	-	3684708	3684998	MSTRG.13374.1	1	291	MSTRG.13374	.	1.5567	0.232306	0	0	11.8454	1.55713	0.505155	0.102043	1.03093	0.127981	2.0756	0.341174
24174	u	novel	-1.03995	-0.0811008	chr16	-	3693505	3693739	MSTRG.13375.1	1	235	MSTRG.13375	.	13.417	2.00222	4.41702	0.490982	0	0	0	0	1.91489	0.237718	0	0
24187	u	novel	-1.08385	-0.0487424	chr16	-	4066100	4067293	MSTRG.13377.1	1	1194	MSTRG.13377	.	13.7814	2.05659	0	0	0	0	0	0	1.00503	0.124765	0	0
24188	u	novel	-1.22808	-0.0004096	chr16	-	4071172	4072102	MSTRG.13378.1	1	931	MSTRG.13378	.	12.8281	1.91434	0	0	12.6885	1.66797	6.11923	1.2361	6.11278	0.75885	0	0
24189	u	novel	-1.1154	-0.0278528	chr16	-	4074809	4076298	MSTRG.13379.1	1	1490	MSTRG.13379	.	3.89732	0.581595	16.2027	1.80104	14.155	1.86075	4.27987	0.864546	0	0	6.73087	1.10638
2389	u	novel	-1.06874	-0.065536	chr1	-	137373124	137373713	MSTRG.1338.1	1	590	MSTRG.1338	.	9.72542	1.45132	2.89695	0.322016	0	0	2.0339	0.410854	0	0	0	0
24175	u	novel	-1.05118	-0.0417792	chr16	-	3834907	3836207	MSTRG.13380.1	1	1301	MSTRG.13380	.	0	0	0	0	13.9324	1.83148	4.73405	0.956293	0	0	1.9731	0.324325
24179	i	novel	-1.15329	-0.0094208	chr16	+	3864730	3871923	MSTRG.13383.1	1	7194	MSTRG.13383	ENSSSCG00000029792	16.4655	2.45714	18.2826	2.03223	13.8204	1.81676	6.57631	1.32844	0	0	8.41312	1.38289
24196	u	novel	-1.17016	-0.0004096	chr16	-	4202618	4203589	MSTRG.13391.1	1	972	MSTRG.13391	.	20.7999	3.10396	13.3354	1.48232	0	0	0	0	2.19597	0.272611	10.0453	1.65118
24199	u	novel	-1.01701	-0.110182	chr16	+	4210960	4211814	MSTRG.13394.1	1	855	MSTRG.13394	.	5.65146	0.843366	15.1064	1.67918	10.7591	1.41433	2.21988	0.448423	0	0	0	0
24201	u	novel	-1.12987	-0.008192	chr16	+	4215370	4216149	MSTRG.13396.1	1	780	MSTRG.13396	.	9.4859	1.41558	0	0	0	0	0	0	0	0	0	0
24230	u	novel	-1.07786	-0.08192	chr16	-	6347845	6348071	MSTRG.13400.1	1	227	MSTRG.13400	.	10.8855	1.62443	0	0	0	0	0	0	0	0	0	0
24223	i	novel	-1.00091	-0.0004096	chr16	-	6232408	6232683	MSTRG.13402.1	1	276	MSTRG.13402	FAM134B	0	0	0	0	0	0	0	0	0	0	11.9928	1.97129
24224	i	novel	-1.2253	-0.012288	chr16	-	6248260	6248958	MSTRG.13403.1	1	699	MSTRG.13403	FAM134B	10.7468	1.60374	0	0	0	0	4.71245	0.951928	14.0644	1.74597	7.84406	1.28936
24225	i	novel	-1.06766	-0.024576	chr16	-	6249494	6249967	MSTRG.13404.1	1	474	MSTRG.13404	FAM134B	10.1667	1.51717	0	0	0	0	0	0	0	0	0	0
24226	i	novel	-1.31761	-0.0004096	chr16	-	6252012	6252317	MSTRG.13405.1	1	306	MSTRG.13405	FAM134B	10.2843	1.53472	0	0	0	0	1.96078	0.396084	0	0	2.71242	0.445849
24227	i	novel	-1.19842	-0.0004096	chr16	-	6269891	6270142	MSTRG.13406.1	1	252	MSTRG.13406	FAM134B	9.36508	1.39755	0	0	0	0	3.57143	0.72144	0	0	5.39286	0.886442
24229	i	novel	-1.3234	-0.0004096	chr16	-	6293268	6293500	MSTRG.13408.1	1	233	MSTRG.13408	FAM134B	11.0215	1.64473	0.643777	0.07156	0	0	0	0	0	0	0.648069	0.106525
2394	u	novel	-1.28103	-0.0503808	chr1	+	137491199	137507051	MSTRG.1341.1	3	2983	MSTRG.1341	.	18.6782	2.78734	20.5203	2.28097	11.8421	1.5567	16.5424	3.34162	27.8961	3.46306	20.697	3.40203
24243	u	novel	-1.41658	-0.129434	chr16	-	6730714	6730949	MSTRG.13410.1	1	236	MSTRG.13410	.	32.6314	4.86956	37.9915	4.22301	36.1017	4.74575	15.2542	3.0814	15.8898	1.97259	20.4746	3.36548
24246	i	novel	-1.30043	-0.002048	chr16	-	6848264	6852619	MSTRG.13412.1	1	4356	MSTRG.13412	ENSSSCG00000016795	11.6676	1.74115	19.7835	2.19907	13.6809	1.79842	8.62626	1.74253	16.3994	2.03585	12.7355	2.09338
24248	u	novel	-1.24207	-0.158925	chr16	+	6895807	6898175	MSTRG.13414.1	1	2369	MSTRG.13414	.	8.89658	1.32763	0	0	0	0	0	0	10.8696	1.34936	0	0
24249	u	novel	-1.16663	-0.008192	chr16	+	6898730	6901903	MSTRG.13415.1	1	3174	MSTRG.13415	.	0	0	0	0	9.05986	1.19096	0	0	4.98645	0.619026	0	0
24251	u	novel	-1.22065	-0.0004096	chr16	-	7146815	7147038	MSTRG.13416.1	1	224	MSTRG.13416	.	0	0	7.36607	0.818788	10.7143	1.40844	0	0	0	0	0	0
24258	u	novel	-1.48029	-0.161382	chr16	-	11613686	11613911	MSTRG.13417.1	1	226	MSTRG.13417	.	8.0177	1.19648	0	0	14.6018	1.91947	0	0	4.37168	0.542707	4.00885	0.658948
24259	u	novel	-1.06525	-0.0856064	chr16	+	11942567	11942807	MSTRG.13418.1	1	241	MSTRG.13418	.	16.917	2.52452	27.3361	3.03859	10.9751	1.44273	6.12448	1.23716	0	0	8.77178	1.44185
24265	u	novel	-1.35222	-0.0806912	chr16	-	15913741	15913969	MSTRG.13419.1	1	229	MSTRG.13419	.	13.0131	1.94194	11.0131	1.22418	12.9432	1.70145	0	0	1.31004	0.162631	2.59389	0.426366
24267	u	novel	-1.20367	-0.0004096	chr16	-	16344574	16344800	MSTRG.13420.1	1	227	MSTRG.13420	.	0	0	0	0	0	0	0	0	6.60793	0.820318	9.31278	1.53077
24270	u	novel	-1.38807	-0.057344	chr16	-	17714188	17714401	MSTRG.13421.1	1	214	MSTRG.13421	.	27.5187	4.1066	27.2617	3.03032	20.3271	2.6721	11.8318	2.39005	9.11215	1.1312	11.2477	1.84882
24271	u	novel	-1.21773	-0.0679936	chr16	-	18342559	18342793	MSTRG.13422.1	1	235	MSTRG.13422	.	10.2468	1.52913	0	0	0	0	1.2766	0.257876	2.55319	0.316957	3.85532	0.633712
24231	u	novel	-1.07585	-0.323584	chr16	-	6348513	6348893	MSTRG.13423.1	1	381	MSTRG.13423	.	10.3045	1.53773	14.5092	1.61279	4.72441	0.621047	3.42782	0.69243	0	0	3.1706	0.521163
24238	u	novel	-1.35728	-0.04096	chr16	-	6555840	6590964	MSTRG.13425.1	2	1170	MSTRG.13425	.	7.45787	1.11293	42.3719	4.70992	6.93615	0.911791	7.61878	1.53902	4.51994	0.561112	8.37843	1.37719
24239	u	novel	-1.09752	-0.0929792	chr16	-	6569200	6590959	MSTRG.13425.2	2	1928	MSTRG.13425	.	19.6885	2.9381	15.8141	1.75784	34.7513	4.56823	11.3574	2.29424	6.43923	0.799376	14.542	2.39032
24241	u	novel	-1.22315	-0.0954368	chr16	-	6582833	6590984	MSTRG.13425.3	2	1367	MSTRG.13425	.	94.5547	14.1104	123.839	13.7655	86.4957	11.3703	30.9727	6.25657	71.322	8.85402	66.4951	10.93
24240	u	novel	-1.28805	-0.0008192	chr16	-	6579731	6581610	MSTRG.13426.1	1	1880	MSTRG.13426	.	16.225	2.42125	15.3484	1.70608	13.1404	1.72737	4.78404	0.966391	7.59947	0.943409	9.40532	1.54598
2414	u	novel	-1.17643	-0.02048	chr1	+	140438404	140441884	MSTRG.1343.1	1	3481	MSTRG.1343	.	0	0	5.97213	0.663843	0	0	0	0	0	0	7.86642	1.29303
24285	i	novel	-1.15495	-0.0004096	chr16	+	18654600	18654831	MSTRG.13430.1	1	232	MSTRG.13430	DROSHA	9.11207	1.35979	13.972	1.55308	0	0	0	0	0	0	0	0
24294	i	novel	-1.21844	-0.0004096	chr16	-	19257133	19257432	MSTRG.13435.1	1	300	MSTRG.13435	PDZD2	6.04	0.901347	10.2767	1.14232	0	0	9.32667	1.88401	12.49	1.55053	0	0
24295	i	novel	-1.32956	-0.139264	chr16	+	19258721	19261029	MSTRG.13436.1	1	2309	MSTRG.13436	PDZD2	8.75401	1.30636	9.24296	1.02742	8.34431	1.0969	3.82503	0.772668	0	0	5.90949	0.971362
24297	i	novel	-1.22541	-0.090112	chr16	+	19262648	19266190	MSTRG.13438.1	1	3543	MSTRG.13438	PDZD2	11.0062	1.64245	7.55687	0.839997	9.302	1.22279	6.86029	1.3858	11.0739	1.37474	11.266	1.85183
24298	i	novel	-1.23576	-0.0004096	chr16	+	19267709	19268424	MSTRG.13439.1	1	716	MSTRG.13439	PDZD2	0	0	0	0	0	0	0	0	0	0	14.9008	2.4493
24299	u	novel	-1.21821	-0.0864256	chr16	+	19293381	19293917	MSTRG.13440.1	1	537	MSTRG.13440	.	11.2477	1.67849	0	0	0	0	3.35195	0.677105	6.70391	0.832234	10.1117	1.6621
24302	u	novel	-1.30865	-0.0118784	chr16	+	19303932	19304752	MSTRG.13443.1	1	821	MSTRG.13443	.	7.17296	1.07042	0	0	0	0	3.65408	0.738135	3.10597	0.38558	0	0
24305	u	novel	-1.20824	-0.02048	chr16	+	19313971	19315903	MSTRG.13444.1	1	1933	MSTRG.13444	.	10.9022	1.62694	12.3637	1.37431	8.45473	1.11142	3.4775	0.702465	9.14485	1.13526	7.10502	1.16788
24308	u	novel	-1.48092	-0.008192	chr16	+	19331679	19331933	MSTRG.13447.1	1	255	MSTRG.13447	.	27.2667	4.06899	31.349	3.48466	21.7529	2.85953	36.7608	7.42579	49.549	6.15109	50.8118	8.3521
24311	u	novel	-1.29384	-0.0004096	chr16	-	19395374	19395697	MSTRG.13450.1	1	324	MSTRG.13450	.	0	0	0	0	0	0	9.25	1.86853	9.16207	1.13739	0	0
24313	u	novel	-1.17339	-0.0499712	chr16	-	19401316	19404610	MSTRG.13452.1	1	3295	MSTRG.13452	.	9.61153	1.43433	10.5587	1.17367	6.47375	0.851006	0	0	9.47603	1.17637	0	0
24320	u	novel	-1.24901	-0.0004096	chr16	-	19478016	19478528	MSTRG.13459.1	1	513	MSTRG.13459	.	10.5906	1.58044	9.83135	1.09282	0	0	0	0	0	0	0	0
24334	u	novel	-1.1962	-0.0004096	chr16	+	20568577	20568806	MSTRG.13464.1	1	230	MSTRG.13464	.	2.62609	0.39189	12.7087	1.41266	0	0	3.91304	0.790447	1.30435	0.161924	8.46522	1.39146
24329	i	novel	-1.18087	-0.049152	chr16	+	20331900	20335965	MSTRG.13469.1	1	4066	MSTRG.13469	ADAMTS12	14.6714	2.18941	15.9122	1.76875	12.7339	1.67393	0	0	33.7756	4.19296	15.1445	2.48936
2408	i	novel	-1.36822	-0.0004096	chr1	+	137675478	137675692	MSTRG.1347.1	1	215	MSTRG.1347	SLC24A5	16.1535	2.41058	0.697674	0.077551	0	0	0	0	3.48837	0.433052	0	0
24341	u	novel	-1.05379	-0.0622592	chr16	+	20983772	20987448	MSTRG.13471.1	2	478	MSTRG.13471	.	3.14854	0.469855	1.51731	0.16866	2.8933	0.380339	4.11088	0.83041	10.0795	1.25128	2.49582	0.410246
24342	u	novel	-1.07262	-0.108954	chr16	+	21006444	21006699	MSTRG.13472.1	1	256	MSTRG.13472	.	4.71875	0.704177	12.8281	1.42593	0	0	5.85938	1.18361	0	0	10.3594	1.70281
24359	i	novel	-1.32771	-0.0004096	chr16	-	21369479	21369694	MSTRG.13477.1	1	216	MSTRG.13477	TTC23L	0	0	0	0	0	0	0	0	0.694444	0.086209	10.4861	1.72364
24361	u	novel	-1.22372	-0.1024	chr16	-	21395937	21400964	MSTRG.13479.1	1	5028	MSTRG.13479	.	12.5362	1.87077	12.3737	1.37542	0	0	4.13107	0.834488	0	0	4.57359	0.751776
24362	u	novel	-1.04645	-0.188416	chr16	-	21402149	21402394	MSTRG.13480.1	1	246	MSTRG.13480	.	14.0935	2.10317	0	0	6.03252	0.793004	0	0	1.21951	0.151392	1.84146	0.302688
24372	u	novel	-1.39784	-0.098304	chr16	-	21824363	21824597	MSTRG.13483.1	1	235	MSTRG.13483	.	1.92766	0.287664	1.26383	0.140483	1.2766	0.167815	7.65958	1.54726	1.25957	0.156365	0	0
24373	u	novel	-1.32387	-0.170803	chr16	+	21962721	21962934	MSTRG.13484.1	1	214	MSTRG.13484	.	0	0	0	0	11.215	1.47426	0	0	0	0	2.82243	0.463932
24375	i	novel	-1.41387	-0.0741376	chr16	+	22154012	22154248	MSTRG.13487.1	1	237	MSTRG.13487	SPEF2	0	0	8.81856	0.980243	4.43038	0.582395	0	0	16.9114	2.09941	12.2954	2.02103
2422	i	novel	-1.26802	-0.0155648	chr1	-	140716884	140718380	MSTRG.1349.1	1	1497	MSTRG.1349	ENSSSCG00000030710	1e-06	0	0	0	1.8e-05	2e-06	3.70742	0.748909	11.2224	1.39317	0	0
24402	u	novel	-1.0659	-0.012288	chr16	+	23176434	23177445	MSTRG.13494.1	1	1012	MSTRG.13494	.	2.5336	0.378088	2.81225	0.312601	1.48221	0.194844	5.18478	1.04734	12.8953	1.60084	0	0
24403	u	novel	-1.17168	-0.0004096	chr16	-	23228945	23230476	MSTRG.13497.1	1	1532	MSTRG.13497	.	12.6162	1.88271	2.08682	0.231964	0	0	1.85835	0.375393	0	0	4.03916	0.663931
24404	u	novel	-1.00785	-0.0643072	chr16	-	23231498	23234565	MSTRG.13498.1	2	2974	MSTRG.13498	.	34.4061	5.13441	32.3564	3.59663	28.9005	3.79911	23.1903	4.68451	43.9428	5.45513	30.6891	5.04448
24405	u	novel	-1.04322	-0.121242	chr16	+	23234223	23238420	MSTRG.13499.1	2	474	MSTRG.13499	.	51.2468	7.64755	52.0385	5.78443	52.9797	6.96445	0.07384	0.014916	0.559883	0.069505	33.4068	5.49119
24406	u	novel	-1.17456	-0.126976	chr16	+	23234240	23236389	MSTRG.13499.2	2	1815	MSTRG.13499	.	13.0964	1.95437	10.0335	1.11529	8.96113	1.17798	17.1151	3.45731	28.6689	3.559	7.53896	1.2392
2423	u	novel	-1.11588	-0.0004096	chr1	-	140745708	140745984	MSTRG.1350.1	1	277	MSTRG.1350	.	0	0	0	0	0	0	0	0	0	0	8.59928	1.41349
24407	u	novel	-1.2759	-0.069632	chr16	+	23239791	23240947	MSTRG.13500.1	1	1157	MSTRG.13500	.	9.8038	1.46302	0	0	9.34399	1.22831	6.51167	1.31538	0	0	7.36992	1.21142
24408	u	novel	-1.28379	-0.004096	chr16	+	23313709	23318002	MSTRG.13501.1	1	4294	MSTRG.13501	.	9.96844	1.48759	7.534	0.837455	6.74243	0.886326	3.0836	0.622898	9.07685	1.12681	6.48346	1.06571
24410	u	novel	-1.19662	-0.172032	chr16	+	23320562	23322419	MSTRG.13503.1	1	1858	MSTRG.13503	.	10.3208	1.54017	7.53068	0.837086	0	0	7.37513	1.4898	8.58504	1.06576	8.01399	1.31729
24411	u	novel	-1.02988	-0.0004096	chr16	+	23323761	23324363	MSTRG.13504.1	1	603	MSTRG.13504	.	18.0249	2.68985	13.6584	1.51822	0	0	7.78773	1.57315	0	0	0	0
24412	u	novel	-1.16382	-0.131072	chr16	+	23325382	23327896	MSTRG.13505.1	1	2515	MSTRG.13505	.	10.7384	1.60248	0	0	1.4539	0.191122	7.94036	1.60398	0	0	7.25805	1.19303
24413	u	novel	-1.34008	-0.0663552	chr16	+	23328570	23329898	MSTRG.13506.1	1	1329	MSTRG.13506	.	0	0	0	0	10.1144	1.32958	0	0	12.0166	1.49175	0	0
24414	u	novel	-1.16208	-0.323584	chr16	+	23330636	23336854	MSTRG.13507.1	1	6219	MSTRG.13507	.	0	0	0	0	3.36871	0.442833	5.54752	1.12061	7.10719	0.882298	2.30715	0.379234
24415	u	novel	-1.09452	-0.192512	chr16	+	23337521	23338426	MSTRG.13508.1	1	906	MSTRG.13508	.	0	0	0	0	6.29139	0.827034	7.11921	1.4381	5.70695	0.708469	0	0
24417	u	novel	-1.27884	-0.0012288	chr16	+	23344862	23346441	MSTRG.13510.1	1	1580	MSTRG.13510	.	11.7323	1.7508	9.34304	1.03854	6.73671	0.885573	7.16202	1.44675	9.07911	1.12709	7.64367	1.25642
24418	u	novel	-1.28639	-0.069632	chr16	+	23349003	23349586	MSTRG.13511.1	1	584	MSTRG.13511	.	8.68664	1.2963	0	0	5.39384	0.709046	6.67295	1.34796	7.80236	0.968597	8.22774	1.35242
24419	u	novel	-1.18552	-0.0004096	chr16	+	23351243	23351748	MSTRG.13512.1	1	506	MSTRG.13512	.	0	0	9.48024	1.05379	6.81818	0.896283	6.93478	1.40085	0	0	0	0
24421	u	novel	-1.42751	-0.0004096	chr16	+	23353996	23354217	MSTRG.13514.1	1	222	MSTRG.13514	.	0	0	0	0	0	0	0	0	0	0	10.6126	1.74443
24437	u	novel	-1.14969	-0.0004096	chr16	-	23668522	23668757	MSTRG.13518.1	1	236	MSTRG.13518	.	9.59746	1.43223	0	0	2.33898	0.307471	0	0	0	0	0	0
24438	u	novel	-1.31514	-0.0004096	chr16	-	23669562	23669957	MSTRG.13519.1	1	396	MSTRG.13519	.	12.8636	1.91964	0	0	0	0	5.30303	1.07123	0	0	8.38889	1.37891
24446	u	novel	-1.3115	-0.0004096	chr16	-	24188035	24188287	MSTRG.13525.1	1	253	MSTRG.13525	.	0.596838	0.089066	0	0	0	0	1.18577	0.239529	0	0	14.2292	2.33891
24447	u	novel	-1.19613	-0.012288	chr16	+	24260624	24262945	MSTRG.13526.1	1	2322	MSTRG.13526	.	10.0547	1.50046	16.9472	1.8838	12.0284	1.58119	7.7991	1.57544	8.54931	1.06132	8.68346	1.42733
2427	u	novel	-1.27337	-0.0475136	chr1	-	140886615	140887161	MSTRG.1353.1	1	547	MSTRG.1353	.	0	0	0	0	0	0	6.84826	1.38337	0	0	0	0
24453	u	novel	-1.00995	-0.028672	chr16	-	24314152	24318107	MSTRG.13532.1	1	3956	MSTRG.13532	.	0	0	1.97913	0.219993	0	0	0	0	0	0	0	0
24454	u	novel	-1.1383	-0.032768	chr16	-	24318396	24328155	MSTRG.13533.1	2	9026	MSTRG.13533	.	11.4238	1.70477	13.2406	1.47178	11.5213	1.51453	5.01265	1.01257	8.35722	1.03748	6.70707	1.10246
24455	u	novel	-1.06487	-0.028672	chr16	-	24328239	24331521	MSTRG.13534.1	1	3283	MSTRG.13534	.	11.424	1.7048	13.2355	1.47121	0	0	6.08346	1.22888	6.71276	0.833332	0	0
24457	u	novel	-1.36562	-0.0847872	chr16	+	24339488	24340600	MSTRG.13536.1	1	1113	MSTRG.13536	.	6.2336	0.930238	0	0	12.7125	1.67112	5.70081	1.15158	0	0	0	0
24461	u	novel	-1.15342	-0.065536	chr16	+	24422078	24422967	MSTRG.13540.1	1	890	MSTRG.13540	.	0	0	0	0	5.65281	0.743089	2.02247	0.408545	0	0	8.86629	1.45738
24463	u	novel	-1.2159	-0.065536	chr16	+	24426353	24426949	MSTRG.13542.1	1	597	MSTRG.13542	.	6.07035	0.905876	9.10218	1.01177	0	0	7.43384	1.50166	5.47236	0.679347	0	0
24464	u	novel	-1.00458	-0.0004096	chr16	+	24431954	24432248	MSTRG.13543.1	1	295	MSTRG.13543	.	10.7492	1.60409	9.15254	1.01737	0	0	1.01695	0.205427	3.05085	0.378737	5.11864	0.841369
24465	u	novel	-1.02414	-0.065536	chr16	+	24432976	24434472	MSTRG.13544.1	1	1497	MSTRG.13544	.	5.02338	0.749637	9.31129	1.03501	5.20641	0.684408	0	0	6.89913	0.856469	0	0
24467	u	novel	-1.43985	-0.0344064	chr16	-	24467337	24467798	MSTRG.13546.1	1	462	MSTRG.13546	.	0	0	0	0	4.22078	0.554842	7.46753	1.50846	0	0	0	0
24468	u	novel	-1.40936	-0.0004096	chr16	-	24490019	24490648	MSTRG.13547.1	1	630	MSTRG.13547	.	9.82698	1.46648	0	0	0	0	3.57143	0.72144	4.28571	0.532035	2.15714	0.354577
24470	u	novel	-1.03389	-0.0004096	chr16	-	24505509	24505986	MSTRG.13549.1	1	478	MSTRG.13549	.	0	0	12.8389	1.42713	0	0	0	0	0	0	0	0
24471	u	novel	-1.14297	-0.04096	chr16	-	24511220	24511551	MSTRG.13550.1	1	332	MSTRG.13550	.	8.68072	1.29542	0	0	0	0	0	0	0	0	0	0
24472	u	novel	-1.01757	-0.02048	chr16	-	24512261	24513462	MSTRG.13551.1	1	1202	MSTRG.13551	.	10.6398	1.58777	0	0	9.25474	1.21658	0	0	0	0	6.54825	1.07636
24474	u	novel	-1.46647	-0.0004096	chr16	-	24518276	24518491	MSTRG.13553.1	1	216	MSTRG.13553	.	9.02315	1.34652	0	0	0	0	0	0	0	0	0	0
24475	u	novel	-1.18543	-0.065536	chr16	-	24519171	24519432	MSTRG.13554.1	1	262	MSTRG.13554	.	0	0	0	0	0	0	8.01527	1.61911	0	0	0	0
24476	u	novel	-1.19232	-0.053248	chr16	-	24524549	24525348	MSTRG.13555.1	1	800	MSTRG.13555	.	12.5687	1.87563	0	0	0	0	5.165	1.04335	0	0	0	0
24477	u	novel	-1.13831	-0.008192	chr16	-	24526065	24531560	MSTRG.13556.1	1	5496	MSTRG.13556	.	8.70997	1.29979	0	0	3.3437	0.439546	1.2913	0.260847	0	0	0	0
24479	u	novel	-1.09186	-0.004096	chr16	-	24535277	24535944	MSTRG.13558.1	1	668	MSTRG.13558	.	9.71108	1.44918	0	0	0	0	0	0	0	0	0	0
24480	u	novel	-1.22552	-0.0004096	chr16	-	24538711	24539189	MSTRG.13559.1	1	479	MSTRG.13559	.	10.0459	1.49915	0	0	11.1608	1.46714	0	0	0	0	3.54573	0.582823
24481	u	novel	-1.32827	-0.12288	chr16	-	24543223	24544311	MSTRG.13560.1	1	1089	MSTRG.13560	.	16.0165	2.39014	0	0	0	0	0	0	6.87144	0.853031	5.40771	0.888884
24483	u	novel	-1.23382	-0.0004096	chr16	-	24564087	24564319	MSTRG.13562.1	1	233	MSTRG.13562	.	11.6652	1.7408	0	0	0	0	0	0	0	0	0	0
24484	u	novel	-1.05563	-0.192512	chr16	-	24565471	24566563	MSTRG.13563.1	1	1093	MSTRG.13563	.	10.4748	1.56316	0	0	0	0	0	0	0	0	0	0
24491	u	novel	-1.25574	-0.073728	chr16	-	24585768	24586426	MSTRG.13564.1	1	659	MSTRG.13564	.	0	0	0	0	0	0	0	0	0	0	8.478	1.39356
24486	u	novel	-1.31382	-0.0253952	chr16	-	24571858	24573022	MSTRG.13566.1	1	1165	MSTRG.13566	.	1.92532	0.287315	0	0	0	0	0	0	8.95107	1.1112	8.41545	1.38328
24487	u	novel	-1.14181	-0.069632	chr16	-	24574401	24574709	MSTRG.13567.1	1	309	MSTRG.13567	.	9.28479	1.38557	0	0	0	0	0	0	0	0	0	0
24488	u	novel	-1.1982	-0.0004096	chr16	-	24575457	24575792	MSTRG.13568.1	1	336	MSTRG.13568	.	12.5833	1.87781	0	0	0	0	3.57143	0.72144	1.47544	0.183163	0	0
2434	u	novel	-1.03198	-0.176128	chr1	+	140943328	140944771	MSTRG.1357.1	1	1444	MSTRG.1357	.	3.93698	0.587514	0	0	0	0	0	0	12.6676	1.57257	0	0
24490	u	novel	-1.2531	-0.111411	chr16	-	24580879	24583157	MSTRG.13570.1	1	2279	MSTRG.13570	.	0	0	1.43729	0.159764	0	0	2.69241	0.543875	0	0	0	0
24492	u	novel	-1.43542	-0.0004096	chr16	-	24588634	24588913	MSTRG.13571.1	1	280	MSTRG.13571	.	11.325	1.69003	0	0	0	0	0	0	0	0	0	0
24494	u	novel	-1.31052	-0.0004096	chr16	-	24589879	24590458	MSTRG.13573.1	1	580	MSTRG.13573	.	10.8414	1.61786	0	0	0	0	0	0	0	0	0	0
24495	u	novel	-1.23575	-0.0004096	chr16	-	24595492	24595723	MSTRG.13574.1	1	232	MSTRG.13574	.	0	0	0	0	0	0	8.25431	1.6674	0	0	0	0
24496	u	novel	-1.21669	-0.0004096	chr16	-	24604875	24605172	MSTRG.13575.1	1	298	MSTRG.13575	.	9.12081	1.36109	0	0	0	0	0	0	0	0	0	0
24497	u	novel	-1.23454	-0.0004096	chr16	+	24630721	24630932	MSTRG.13577.1	1	212	MSTRG.13577	.	0	0	0	0	0	0	9.68396	1.95619	0	0	0	0
24498	u	novel	-1.11546	-0.0618496	chr16	+	24642574	24648439	MSTRG.13578.1	1	5866	MSTRG.13578	.	6.06955	0.905757	7.57347	0.841843	0	0	1.30683	0.263983	13.0621	1.62154	3.44791	0.566745
24500	u	novel	-1.0626	-0.008192	chr16	+	24656827	24658512	MSTRG.13580.1	1	1686	MSTRG.13580	.	6.61981	0.987872	6.12752	0.681115	0	0	2.09134	0.422457	8.75089	1.08635	0	0
24503	o	novel	-1.01023	-0.0028672	chr16	+	24664115	24706835	MSTRG.13583.1	5	6450	MSTRG.13583	EGFLAM	9.39471	1.40197	9.14102	1.01609	6.82686	0.897425	6.28178	1.26894	13.6341	1.69256	8.90625	1.46395
24504	x	novel	-1.10697	-0.012288	chr16	+	24667102	24669724	MSTRG.13584.1	1	2623	MSTRG.13584	ENSSSCG00000019645	6.10103	0.910454	6.37454	0.708573	0	0	0	0	12.5738	1.56093	8.20397	1.34851
2436	u	novel	-1.13901	-0.167936	chr1	+	140948058	140948304	MSTRG.1359.1	1	247	MSTRG.1359	.	0	0	0	0	12.753	1.67645	0	0	0	0	0	0
24516	u	novel	-1.17076	-0.004096	chr16	-	25271208	25271766	MSTRG.13590.1	1	559	MSTRG.13590	.	9.45438	1.41087	0	0	0	0	0.536673	0.10841	0	0	0.810376	0.133204
24541	u	novel	-1.00619	-0.0004096	chr16	+	26018567	26018776	MSTRG.13596.1	1	210	MSTRG.13596	.	0	0	0.714286	0.079398	1.42857	0.187793	0	0	0	0	9.69524	1.59364
24535	u	novel	-1.32198	-0.1024	chr16	-	25729851	25730340	MSTRG.13599.1	1	490	MSTRG.13599	.	9.80408	1.46306	0	0	0	0	0	0	0	0	0	0
24549	i	novel	-1.40091	-0.0339968	chr16	-	27093993	27094204	MSTRG.13603.1	1	212	MSTRG.13603	C7	2.75	0.410381	0	0	10.0047	1.31517	7.05189	1.4245	11.8821	1.47506	9.64151	1.58481
24565	u	novel	-1.05666	-0.04096	chr16	-	29094121	29094350	MSTRG.13607.1	1	230	MSTRG.13607	.	0	0	0	0	0	0	7.82609	1.58089	0	0	8.52174	1.40075
24570	u	novel	-1.05194	-0.057344	chr16	-	29270229	29272629	MSTRG.13609.2	3	1935	MSTRG.13609	.	54.9928	8.20655	31.9403	3.55038	22.0737	2.9017	19.1418	3.86671	27.6455	3.43195	35.6359	5.8576
2440	u	novel	-1.18461	-0.059392	chr1	+	141140973	141141371	MSTRG.1361.1	1	399	MSTRG.1361	.	0	0	0	0	9.30827	1.22362	0	0	10.8221	1.34347	8.70426	1.43075
24571	u	novel	-1.1359	-0.012288	chr16	+	29287225	29288587	MSTRG.13610.1	1	1363	MSTRG.13610	.	0	0	0	0	0	0	0	0	0	0	21.2605	3.49465
24574	u	novel	-1.24894	-0.129024	chr16	+	29346609	29346890	MSTRG.13611.1	1	282	MSTRG.13611	.	22.4894	3.35608	20.6596	2.29645	20.2128	2.65707	10.1064	2.04152	13.2979	1.65082	11.2447	1.84833
24576	i	novel	-1.26172	-0.024576	chr16	+	29348992	29350480	MSTRG.13613.1	1	1489	MSTRG.13613	ENSSSCG00000024680	10.5091	1.56826	0	0	8.85034	1.16342	0	0	0	0	0	0
24577	i	novel	-1.03915	-0.212992	chr16	+	29351185	29351634	MSTRG.13614.1	1	450	MSTRG.13614	ENSSSCG00000024680	12.7333	1.90019	0	0	0	0	5.66667	1.14468	0	0	7.38222	1.21344
24578	i	novel	-1.03058	-0.0004096	chr16	+	29353937	29354366	MSTRG.13615.1	1	430	MSTRG.13615	ENSSSCG00000024680	13.8651	2.06909	0	0	0	0	0	0	0	0	0.695349	0.114297
24587	u	novel	-1.21304	-0.045056	chr16	-	29556512	29557883	MSTRG.13620.1	1	1372	MSTRG.13620	.	8.80248	1.31359	0	0	0	0	2.68429	0.542235	0	0	0	0
24588	u	novel	-1.17744	-0.0004096	chr16	-	29559738	29560669	MSTRG.13621.1	1	932	MSTRG.13621	.	16.2318	2.42226	0	0	0	0	0	0	0	0	0	0
24589	u	novel	-1.23073	-0.057344	chr16	-	29561808	29564674	MSTRG.13622.1	1	2867	MSTRG.13622	.	10.4248	1.55569	0	0	1.52515	0.200489	0.27834	0.056226	4.48308	0.556537	5.20849	0.856137
24599	x	novel	-1.05112	-0.159744	chr16	+	29634683	29635005	MSTRG.13629.1	1	323	MSTRG.13629	PAIP1	134.737	20.1067	146.009	16.2299	0	0	66.9009	13.5142	154.528	19.1833	97.678	16.0557
2439	i	novel	-1.18799	-0.016384	chr1	+	141105560	141105808	MSTRG.1363.1	1	249	MSTRG.1363	SLC28A2	0	0	14.4056	1.60128	3.01205	0.395948	0	0	0	0	4.22892	0.695121
24606	u	novel	-1.15949	-0.016384	chr16	-	29943952	29944206	MSTRG.13632.1	1	255	MSTRG.13632	.	10.0667	1.50225	28.5725	3.17603	7.01961	0.922762	4.11765	0.831777	13.5294	1.67956	10.298	1.69272
24608	u	novel	-1.16893	-0.012288	chr16	-	30558561	30558773	MSTRG.13633.1	1	213	MSTRG.13633	.	0	0	0	0	11.2535	1.47933	5.6338	1.13804	0	0	0	0
24609	u	novel	-1.21882	-0.0004096	chr16	-	30598958	30599331	MSTRG.13634.1	1	374	MSTRG.13634	.	10.0936	1.50626	1.60428	0.178326	0	0	0	0	0	0	0	0
24610	u	novel	-1.24886	-0.0004096	chr16	-	30599854	30600231	MSTRG.13635.1	1	378	MSTRG.13635	.	9.18783	1.3711	5.15873	0.573428	0	0	0	0	0	0	0	0
24612	u	novel	-1.21136	-0.0004096	chr16	+	30785272	30785970	MSTRG.13637.1	1	699	MSTRG.13637	.	10.3691	1.54738	6.22318	0.691748	0	0	0	0	0	0	0	0
24613	u	novel	-1.41067	-0.200704	chr16	+	30791734	30792077	MSTRG.13638.1	1	344	MSTRG.13638	.	9.59884	1.43243	0	0	7.31395	0.961455	0	0	5.11214	0.634629	5.26744	0.865827
24614	u	novel	-1.10024	-0.0004096	chr16	+	30794862	30795358	MSTRG.13639.1	1	497	MSTRG.13639	.	10.5795	1.57877	0	0	0	0	0.603622	0.121933	0	0	0	0
2441	u	novel	-1.20009	-0.151552	chr1	-	141144703	141144944	MSTRG.1364.1	1	242	MSTRG.1364	.	0	0	9.26446	1.02981	0.603306	0.079308	9.38843	1.89649	5.53719	0.687395	3.11984	0.512818
24615	u	novel	-1.07607	-0.148275	chr16	+	30823974	30824196	MSTRG.13640.1	1	223	MSTRG.13640	.	9.47982	1.41467	0	0	0	0	0	0	0	0	0	0
24617	i	novel	-1.40147	-0.140493	chr16	-	31087347	31087590	MSTRG.13642.1	1	244	MSTRG.13642	ENSSSCG00000026527	0	0	15.608	1.73493	15.9944	2.10254	7.93579	1.60305	16.9191	2.10036	10.2066	1.6777
24626	i	novel	-1.11442	-0.0069632	chr16	+	31924568	31930500	MSTRG.13648.1	1	5933	MSTRG.13648	PARP8	9.49334	1.41669	0	0	5.42391	0.712999	6.05596	1.22332	10.3303	1.28242	1.51188	0.248512
24636	i	novel	-1.39171	-0.0069632	chr16	+	33956153	33958145	MSTRG.13653.1	1	1993	MSTRG.13653	ITGA1	12.4054	1.85126	0	0	0	0	0	0	0	0	0	0
24637	i	novel	-1.28628	-0.008192	chr16	+	33959905	33960199	MSTRG.13654.1	1	295	MSTRG.13654	ITGA1	0	0	0	0	0	0	0	0	0	0	11.6915	1.92178
24654	i	novel	-1.14778	-0.02048	chr16	-	34881861	34882353	MSTRG.13659.1	1	493	MSTRG.13659	ENSSSCG00000024947	11.0264	1.64546	0	0	0	0	0	0	1.5213	0.188856	1.83773	0.302074
24655	i	novel	-1.09788	-0.018432	chr16	-	34886331	34887016	MSTRG.13660.1	1	686	MSTRG.13660	ENSSSCG00000024947	9.66327	1.44205	0	0	3.93586	0.517388	0	0	3.71283	0.460916	1.98105	0.325632
24656	i	novel	-1.13061	-0.045056	chr16	-	34897865	34898178	MSTRG.13661.1	1	314	MSTRG.13661	ENSSSCG00000024947	0	0	0	0	0	0	6.6879	1.35098	0	0	0	0
24660	u	novel	-1.19425	-0.0004096	chr16	+	35003922	35004221	MSTRG.13663.1	1	300	MSTRG.13663	.	42.7833	6.38454	52.3267	5.81646	29.24	3.84374	67.7533	13.6864	118.463	14.7062	97.4667	16.0209
24662	u	novel	-1.21155	-0.0004096	chr16	-	35218377	35218776	MSTRG.13665.1	1	400	MSTRG.13665	.	10.57	1.57736	2.25	0.250103	0	0	0	0	0	0	0	0
24663	u	novel	-1.18373	-0.0004096	chr16	-	35221944	35222239	MSTRG.13666.1	1	296	MSTRG.13666	.	12.2432	1.82706	0	0	0	0	0	0	0	0	0	0
24667	i	novel	-1.14811	-0.0004096	chr16	-	35349777	35350346	MSTRG.13669.1	1	570	MSTRG.13669	ARL15	0	0	8.14737	0.905635	16.6035	2.18261	6.84211	1.38213	0	0	8.25789	1.35738
2443	i	novel	-1.26384	-0.0004096	chr1	-	141153320	141153554	MSTRG.1367.1	1	235	MSTRG.1367	SHF	8.99574	1.34243	15.166	1.6858	7.02128	0.922981	14.1362	2.85555	19.9574	2.47755	11.566	1.90114
24670	u	novel	-1.2369	-0.0004096	chr16	-	35500497	35500756	MSTRG.13670.1	1	260	MSTRG.13670	.	12.6692	1.89062	0.576923	0.064129	0	0	0	0	0	0	0	0
24672	u	novel	-1.21464	-0.0004096	chr16	+	35548054	35548347	MSTRG.13672.1	1	294	MSTRG.13672	.	0	0	0	0	0	0	7.14286	1.44288	0	0	0	0
24673	u	novel	-1.0367	-0.0004096	chr16	+	35549183	35549697	MSTRG.13673.1	1	515	MSTRG.13673	.	0	0	0	0	0	0	0	0	0	0	8.79029	1.44489
24674	u	novel	-1.01981	-0.0004096	chr16	-	35585183	35585416	MSTRG.13674.1	1	234	MSTRG.13674	.	9.03419	1.34817	0	0	0	0	0	0	0	0	0	0
24675	u	novel	-1.29534	-0.0004096	chr16	+	35597381	35597609	MSTRG.13675.1	1	229	MSTRG.13675	.	9.23144	1.3776	0	0	0	0	0	0	1.31004	0.162631	0	0
24707	u	novel	-1.41032	-0.012288	chr16	-	36880747	36881030	MSTRG.13682.1	1	284	MSTRG.13682	.	10.6338	1.58688	0	0	0	0	2.11268	0.426767	0	0	0	0
24723	i	novel	-1.23369	-0.065536	chr16	+	38139120	38141856	MSTRG.13690.1	1	2737	MSTRG.13690	MAP3K1	9.21337	1.37491	5.37084	0.597005	4.86628	0.639696	0	0	3.44867	0.428123	2.53782	0.417149
24725	i	novel	-1.50448	-0.0004096	chr16	+	38159242	38159491	MSTRG.13692.1	1	250	MSTRG.13692	MAP3K1	0	0	0	0	0	0	0	0	0	0	9.664	1.58851
24726	i	novel	-1.02661	-0.0004096	chr16	+	38178353	38179218	MSTRG.13693.1	1	866	MSTRG.13693	MAP3K1	9.58314	1.43009	10.1755	1.13108	8.097	1.06439	3.78522	0.764626	0	0	0	0
24734	u	novel	-1.31744	-0.012288	chr16	-	38329151	38329619	MSTRG.13694.1	1	469	MSTRG.13694	.	9.17591	1.36932	0	0	0	0	3.81876	0.771402	2.87846	0.357337	0	0
24735	u	novel	-1.19966	-0.004096	chr16	+	38433413	38433656	MSTRG.13695.1	1	244	MSTRG.13695	.	4.95082	0.738809	12.9098	1.43501	0	0	5.53279	1.11764	0	0	3.71312	0.610337
24733	u	novel	-1.0699	-0.0372736	chr16	+	38291447	38294454	MSTRG.13698.1	1	3008	MSTRG.13698	.	6.03757	0.900984	5.76463	0.640777	6.95678	0.914503	7.25765	1.46607	6.46476	0.802545	10.6955	1.75805
24743	u	novel	-1.27377	-0.0004096	chr16	+	38667372	38668640	MSTRG.13701.1	1	1269	MSTRG.13701	.	0	0	8.36643	0.929985	0	0	5.90386	1.1926	12.9393	1.60631	5.69503	0.936112
24745	u	novel	-1.0125	-0.038912	chr16	+	38715540	38716105	MSTRG.13703.1	1	566	MSTRG.13703	.	0	0	0	0	0	0	6.88516	1.39082	0	0	0	0
24746	u	novel	-1.1125	-0.012288	chr16	+	38718680	38719163	MSTRG.13704.1	1	484	MSTRG.13704	.	0	0	13.0103	1.44619	0	0	6.80579	1.37479	0	0	14.031	2.30632
24747	u	novel	-1.17823	-0.26624	chr16	+	38719570	38721416	MSTRG.13705.1	1	1847	MSTRG.13705	.	0	0	8.36492	0.929817	0	0	5.4447	1.09985	5.89063	0.731272	9.19978	1.5122
24748	u	novel	-1.48659	-0.0004096	chr16	+	38733899	38734130	MSTRG.13706.1	1	232	MSTRG.13706	.	9.71983	1.45049	0	0	0	0	2.58621	0.522422	0	0	0	0
24749	u	novel	-1.23657	-0.0004096	chr16	+	38738645	38738916	MSTRG.13707.1	1	272	MSTRG.13707	.	10.5478	1.57404	0	0	3.30882	0.434961	0	0	0	0	0	0
24750	u	novel	-1.06528	-0.0004096	chr16	+	38751920	38752351	MSTRG.13708.1	1	432	MSTRG.13708	.	2.7963	0.41729	0	0	10.75	1.41314	2.43056	0.49098	0	0	2.09722	0.344728
24751	u	novel	-1.26786	-0.0925696	chr16	+	38759782	38761399	MSTRG.13709.1	1	1618	MSTRG.13709	.	10.0569	1.50078	0	0	0	0	3.73205	0.753886	0	0	0	0
24754	u	novel	-1.20034	-0.0004096	chr16	-	38890893	38891138	MSTRG.13710.1	1	246	MSTRG.13710	.	0	0	0	0	0	0	0	0	0	0	8.5935	1.41254
24756	u	novel	-1.33732	-0.0004096	chr16	-	39578742	39578997	MSTRG.13712.1	1	256	MSTRG.13712	.	9.10938	1.35939	0	0	0	0	0	0	0	0	3.53906	0.581728
24757	u	novel	-1.16871	-0.0004096	chr16	-	39582215	39582479	MSTRG.13713.1	1	265	MSTRG.13713	.	10.2566	1.53059	0	0	0	0	0	0	0	0	0	0
24758	u	novel	-1.13159	-0.0270336	chr16	-	39587399	39588426	MSTRG.13714.1	1	1028	MSTRG.13714	.	6.90078	1.0298	0	0	0	0	1.46062	0.295049	0	0	0	0
24759	u	novel	-1.16359	-0.008192	chr16	-	39628601	39628854	MSTRG.13715.1	1	254	MSTRG.13715	.	11.2953	1.68559	0	0	0	0	0	0	0	0	0	0
24770	i	novel	-1.32899	-0.049152	chr16	-	40276428	40277047	MSTRG.13722.1	1	620	MSTRG.13722	RAB3C	11.9339	1.78089	0	0	0	0	7.68065	1.55151	14.9387	1.85451	0	0
24772	u	novel	-1.04979	-0.0004096	chr16	-	40670843	40671132	MSTRG.13723.1	1	290	MSTRG.13723	.	0	0	0	0	0	0	0	0	0	0	10.4138	1.71175
24773	u	novel	-1.154	-0.069632	chr16	-	40686997	40687277	MSTRG.13724.1	1	281	MSTRG.13724	.	2.02135	0.301646	0	0	4.54804	0.597862	8.00712	1.61746	4.80427	0.596409	0	0
24774	u	novel	-1.00883	-0.016384	chr16	-	40827829	40828291	MSTRG.13725.1	1	463	MSTRG.13725	.	3.26134	0.486688	2.21166	0.245841	0.647948	0.085176	7.12743	1.43976	0	0	2.28294	0.375254
24775	u	novel	-1.28811	-0.073728	chr16	-	40864598	40864915	MSTRG.13726.1	1	318	MSTRG.13726	.	3.79874	0.566885	15.2327	1.69322	4.24528	0.558063	1.84591	0.37288	2.83019	0.351344	1.89937	0.312206
24787	u	novel	-1.22521	-0.0004096	chr16	+	42603100	42603469	MSTRG.13729.1	1	370	MSTRG.13729	.	11.4189	1.70404	14.0757	1.56461	15.3162	2.01339	15.3162	3.09392	24.9703	3.09985	23	3.78059
24788	u	novel	-1.1313	-0.110592	chr16	-	42611194	42611673	MSTRG.13731.1	1	480	MSTRG.13731	.	9.41875	1.40556	0	0	0	0	0	0	0	0	0	0
24793	u	novel	-1.18215	-0.004096	chr16	+	42703759	42704526	MSTRG.13735.1	1	768	MSTRG.13735	.	0	0	10.7943	1.19986	14.2031	1.86707	3.90625	0.789074	0	0	4.32552	0.711001
24794	u	novel	-1.05754	-0.170803	chr16	-	42714851	42716242	MSTRG.13736.1	1	1392	MSTRG.13736	.	6.67816	0.996579	0	0	4.9569	0.651608	2.47845	0.500654	0	0	2.8204	0.463599
24795	u	novel	-1.32216	-0.0004096	chr16	-	42722705	42723179	MSTRG.13737.1	1	475	MSTRG.13737	.	9.71158	1.44925	0	0	0	0	2.52632	0.510324	0	0	0	0
24800	u	novel	-1.12503	-0.0004096	chr16	-	42798690	42799005	MSTRG.13742.1	1	316	MSTRG.13742	.	9.07911	1.35487	0	0	2.37342	0.311997	0.936709	0.189218	2.8481	0.353568	1.43354	0.235637
24801	u	novel	-1.08321	-0.024576	chr16	-	42802689	42803201	MSTRG.13743.1	1	513	MSTRG.13743	.	10.0078	1.49346	10.5263	1.17007	0	0	2.04678	0.413457	3.39181	0.421065	0	0
24802	u	novel	-1.24932	-0.067584	chr16	+	42805791	42806153	MSTRG.13744.1	1	363	MSTRG.13744	.	9.31956	1.39075	0	0	0	0	0	0	0	0	0	0
24803	u	novel	-1.00738	-0.0004096	chr16	+	42807384	42807692	MSTRG.13745.1	1	309	MSTRG.13745	.	0	0	0	0	0	0	0	0	0	0	9.69579	1.59373
24804	u	novel	-1.06977	-0.0004096	chr16	+	42808278	42808551	MSTRG.13746.1	1	274	MSTRG.13746	.	0	0	0	0	0	0	0	0	0	0	10.9197	1.79491
24805	u	novel	-1.29661	-0.0004096	chr16	+	42809748	42810124	MSTRG.13747.1	1	377	MSTRG.13747	.	0	0	0	0	0	0	0	0	0	0	9.20424	1.51293
2468	u	novel	-1.02585	-0.0192512	chr1	-	141628578	141629137	MSTRG.1375.1	1	560	MSTRG.1375	.	6.74107	1.00597	0	0	10.9643	1.44131	3.75	0.757511	6.12321	0.760145	3.11071	0.511319
24812	u	novel	-1.04758	-0.0561152	chr16	+	42882395	42910081	MSTRG.13752.1	4	1671	MSTRG.13752	.	26.5829	3.96695	25.1574	2.79641	23.6712	3.11169	13.9599	2.81994	25.7157	3.19239	17.9632	2.95267
24815	u	novel	-1.22588	-0.073728	chr16	+	43078055	43080516	MSTRG.13755.1	1	2462	MSTRG.13755	.	9.15516	1.36622	0	0	5.96791	0.784511	5.56784	1.12472	11.1101	1.37922	6.49553	1.06769
24816	u	novel	-1.19226	-0.028672	chr16	+	43080772	43090612	MSTRG.13756.1	1	9841	MSTRG.13756	.	10.7235	1.60026	11.7577	1.30695	9.63662	1.26678	7.1761	1.44959	14.6526	1.81899	10.9145	1.79406
24818	u	novel	-1.34546	-0.0258048	chr16	+	43104062	43104661	MSTRG.13758.1	1	600	MSTRG.13758	.	8.96667	1.33809	0	0	0	0	0	0	0	0	0	0
24819	u	novel	-1.18815	-0.126976	chr16	+	43104925	43106736	MSTRG.13759.1	1	1812	MSTRG.13759	.	0	0	0	0	0	0	6.55629	1.32439	0	0	8.79653	1.44592
24820	u	novel	-1.14564	-0.118784	chr16	+	43108984	43111194	MSTRG.13760.1	1	2211	MSTRG.13760	.	0	0	7.85979	0.873669	0	0	0	0	0	0	5.27356	0.866833
24822	u	novel	-1.34263	-0.0004096	chr16	+	43116754	43118535	MSTRG.13762.1	1	1782	MSTRG.13762	.	10.0499	1.49975	0	0	0	0	0	0	5.4571	0.677453	0	0
24824	u	novel	-1.24737	-0.0811008	chr16	+	43121269	43122083	MSTRG.13764.1	1	815	MSTRG.13764	.	0	0	1.77017	0.196767	0	0	14.1718	2.86274	0	0	0	0
24825	u	novel	-1.14733	-0.0004096	chr16	+	43122557	43123102	MSTRG.13765.1	1	546	MSTRG.13765	.	0	0	0	0	0	0	6.57143	1.32745	0	0	2.72769	0.448359
24826	u	novel	-1.22032	-0.065536	chr16	+	43125024	43128195	MSTRG.13766.1	1	3172	MSTRG.13766	.	0	0	2.01087	0.223522	0	0	0	0	8.08932	1.00422	0	0
24827	u	novel	-1.1051	-0.016384	chr16	+	43131388	43133796	MSTRG.13767.1	1	2409	MSTRG.13767	.	10.3944	1.55115	0	0	0	0	0	0	3.01743	0.374589	1.31612	0.216336
24828	u	novel	-1.15878	-0.0024576	chr16	+	43135318	43136757	MSTRG.13768.1	1	1440	MSTRG.13768	.	10.591	1.58049	10.8181	1.2025	4.68333	0.615647	5.16806	1.04396	10.8694	1.34935	0	0
24829	u	novel	-1.12813	-0.0253952	chr16	+	43139586	43140653	MSTRG.13769.1	1	1068	MSTRG.13769	.	10.6685	1.59206	0	0	0	0	0	0	0	0	0	0
24831	u	novel	-1.2235	-0.008192	chr16	+	43153089	43154321	MSTRG.13771.1	1	1233	MSTRG.13771	.	11.1322	1.66125	0	0	0	0	0	0	0	0	0	0
24832	u	novel	-1.17479	-0.0004096	chr16	+	43198593	43199309	MSTRG.13772.1	1	717	MSTRG.13772	.	0	0	0.751125	0.083493	2.00628	0.263735	4.33473	0.875628	0	0	0	0
24833	u	novel	-1.3044	-0.065536	chr16	+	43202689	43203681	MSTRG.13773.1	1	993	MSTRG.13773	.	9.0423	1.34938	0	0	0	0	0	0	0	0	0	0
24834	u	novel	-1.30735	-0.0004096	chr16	+	43206129	43206502	MSTRG.13774.1	1	374	MSTRG.13774	.	10.0561	1.50067	0	0	0	0	0	0	0	0	0	0
24837	u	novel	-1.20452	-0.024576	chr16	+	43221568	43222064	MSTRG.13777.1	1	497	MSTRG.13777	.	10.8833	1.62411	0	0	0	0	0	0	0	0	0	0
24838	u	novel	-1.22672	-0.0004096	chr16	+	43226575	43227146	MSTRG.13778.1	1	572	MSTRG.13778	.	10.021	1.49543	0	0	0	0	0	0	0	0	0	0
2485	u	novel	-1.18872	-0.0004096	chr1	+	142004561	142004814	MSTRG.1378.1	1	254	MSTRG.1378	.	0	0	0	0	0	0	0	0	1.1811	0.146624	8.32283	1.36805
24842	u	novel	-1.24925	-0.0004096	chr16	+	44183125	44183410	MSTRG.13780.1	1	286	MSTRG.13780	.	0	0	0	0	0	0	0	0	0	0	7.39161	1.21498
24843	u	novel	-1.2552	-0.0004096	chr16	+	44189667	44189975	MSTRG.13781.1	1	309	MSTRG.13781	.	11.2395	1.67726	0	0	0	0	2.42719	0.490299	4.36893	0.542366	0	0
24850	u	novel	-1.14476	-0.659456	chr16	+	44336836	44337384	MSTRG.13785.1	1	549	MSTRG.13785	.	10.4554	1.56025	3.00547	0.334078	0	0	0	0	0	0	7.34973	1.2081
24851	u	novel	-1.20709	-0.0004096	chr16	-	44403722	44404171	MSTRG.13786.1	1	450	MSTRG.13786	.	9.06	1.35202	1.28889	0.143269	0	0	1.32	0.266644	0	0	0	0
24853	u	novel	-1.1531	-0.032768	chr16	+	44470222	44471282	MSTRG.13787.1	1	1061	MSTRG.13787	.	0	0	0	0	0	0	6.5033	1.31369	0	0	3.70096	0.608339
24855	u	novel	-1.32801	-0.0004096	chr16	+	44480930	44481405	MSTRG.13789.1	1	476	MSTRG.13789	.	0	0	0	0	0	0	0	0	12.5357	1.5562	0	0
24856	u	novel	-1.23806	-0.0004096	chr16	-	44482645	44482915	MSTRG.13790.1	1	271	MSTRG.13790	.	15.6015	2.3282	2.76753	0.307629	0	0	2.21402	0.447239	0	0	0	0
24857	u	novel	-1.21135	-0.006144	chr16	+	44488506	44489725	MSTRG.13791.1	1	1220	MSTRG.13791	.	0	0	0	0	0	0	0	0	11.8623	1.4726	0	0
24858	u	novel	-1.18852	-0.0073728	chr16	+	44490130	44491050	MSTRG.13792.1	1	921	MSTRG.13792	.	0	0	0	0	0	0	0	0	10.9088	1.35423	0	0
24860	u	novel	-1.14767	-0.004096	chr16	+	44505225	44506431	MSTRG.13794.1	1	1207	MSTRG.13794	.	10.1284	1.51146	0	0	0	0	0	0	0	0	0	0
24861	u	novel	-1.20842	-0.0004096	chr16	+	44507788	44508220	MSTRG.13795.1	1	433	MSTRG.13795	.	0	0	0	0	0	0	0	0	0	0	9.76443	1.60501
24862	u	novel	-1.29696	-0.159744	chr16	+	44509646	44509898	MSTRG.13796.1	1	253	MSTRG.13796	.	0	0	0	0	2.37154	0.311751	0	0	0	0	10.7431	1.76588
24863	u	novel	-1.14981	-0.0004096	chr16	+	44510520	44510791	MSTRG.13797.1	1	272	MSTRG.13797	.	11.1029	1.65689	0	0	0	0	0	0	0	0	0	0
24864	u	novel	-1.27929	-0.012288	chr16	+	44593154	44593464	MSTRG.13798.1	1	311	MSTRG.13798	.	0.485531	0.072456	0	0	0	0	0.96463	0.194858	0	0	8.24116	1.35463
24865	u	novel	-1.14322	-0.127795	chr16	+	44597821	44598396	MSTRG.13799.1	1	576	MSTRG.13799	.	9.4375	1.40836	0	0	0	0	0	0	0	0	0	0
24866	u	novel	-1.10129	-0.0004096	chr16	+	44601015	44601341	MSTRG.13800.1	1	327	MSTRG.13800	.	11.0826	1.65385	3.21101	0.356925	0	0	0	0	6.2513	0.776046	7.30275	1.20038
24867	u	novel	-1.12227	-0.0004096	chr16	+	44603441	44603978	MSTRG.13801.1	1	538	MSTRG.13801	.	0	0	1.08922	0.121074	3.34572	0.439812	2.23048	0.450564	10.0242	1.24442	0	0
24868	u	novel	-1.11756	-0.0004096	chr16	+	44606283	44606557	MSTRG.13802.1	1	275	MSTRG.13802	.	12.08	1.80269	0	0	0	0	4.35273	0.879264	0	0	0	0
24870	u	novel	-1.314	-0.0004096	chr16	+	44618720	44618966	MSTRG.13804.1	1	247	MSTRG.13804	.	12.2267	1.82459	0	0	0	0	0	0	0	0	0	0
24871	u	novel	-1.13756	-0.0004096	chr16	+	44620719	44620989	MSTRG.13805.1	1	271	MSTRG.13805	.	0	0	0	0	0	0	7.19557	1.45353	0	0	0	0
24873	u	novel	-1.37715	-0.008192	chr16	+	44623962	44624249	MSTRG.13807.1	1	288	MSTRG.13807	.	11.4826	1.71355	0	0	0	0	0	0	0	0	0	0
24874	u	novel	-1.20123	-0.0004096	chr16	+	44627906	44628357	MSTRG.13808.1	1	452	MSTRG.13808	.	0	0	0	0	0	0	0	0	0	0	13.3628	2.19649
2472	i	novel	-1.34802	-0.0004096	chr1	-	141719173	141719404	MSTRG.1381.1	1	232	MSTRG.1381	ENSSSCG00000028089	14.319	2.13681	2.38582	0.265199	0	0	1.3753	0.277815	0	0	0	0
24876	u	novel	-1.42952	-0.0442368	chr16	+	44718995	44719338	MSTRG.13810.1	1	344	MSTRG.13810	.	0	0	0	0	6.97674	0.917127	13.75	2.77754	0	0	0	0
24879	i	novel	-1.44078	-0.0004096	chr16	+	45924371	45924585	MSTRG.13812.1	1	215	MSTRG.13812	RNF180	11.2372	1.67692	0	0	0	0	0	0	0	0	0	0
24889	u	novel	-1.02393	-0.024576	chr16	-	46898057	46898624	MSTRG.13815.1	1	568	MSTRG.13815	.	2.65845	0.39672	0	0	0	0	2.69177	0.543745	0	0	8.50176	1.39746
24882	x	novel	-1.20418	-0.0004096	chr16	-	46522083	46524995	MSTRG.13817.1	1	2913	MSTRG.13817	FAM159B	31.127	4.64507	0	0	0	0	21.7666	4.39691	33.7635	4.19145	0	0
2473	x	novel	-1.18641	-0.0004096	chr1	-	141720671	141720966	MSTRG.1382.1	1	296	MSTRG.1382	ENSSSCG00000028089	0	0	3.5473	0.394306	11.1486	1.46554	1.88514	0.380803	3.04054	0.377457	1.02027	0.167705
24893	i	novel	-1.35758	-0.0024576	chr16	-	47175762	47176126	MSTRG.13825.1	1	365	MSTRG.13825	ADAMTS6	3.30959	0.493889	0	0	4.52055	0.594248	0	0	0	0	0	0
24920	u	novel	-1.2448	-0.0004096	chr16	+	47764043	47764736	MSTRG.13835.1	1	694	MSTRG.13835	.	0	0	7.82853	0.870194	0	0	0	0	8.9121	1.10636	0	0
24939	u	novel	-1.2603	-0.0004096	chr16	+	48926172	48926434	MSTRG.13839.1	1	263	MSTRG.13839	.	0	0	0	0	11.0038	1.4465	1.71103	0.345633	0	0	16.0722	2.64185
24940	u	novel	-1.23405	-0.140083	chr16	+	48927167	48928225	MSTRG.13840.1	1	1059	MSTRG.13840	.	0	0	0	0	0	0	1.84136	0.37196	0	0	0	0
24941	u	novel	-1.05974	-0.0086016	chr16	+	48930428	48931779	MSTRG.13841.1	1	1352	MSTRG.13841	.	5.69822	0.850344	0	0	11.5725	1.52126	0	0	0	0	0	0
24942	u	novel	-1.12455	-0.106496	chr16	+	48935694	48936165	MSTRG.13842.1	1	472	MSTRG.13842	.	11.7924	1.75977	0	0	0	0	0	0	0	0	0	0
24943	u	novel	-1.23023	-0.0004096	chr16	+	48939524	48939780	MSTRG.13843.1	1	257	MSTRG.13843	.	16.358	2.44109	0	0	0	0	0	0	0	0	0	0
24944	u	novel	-1.11521	-0.0004096	chr16	+	48972629	48972836	MSTRG.13844.1	1	208	MSTRG.13844	.	10.1635	1.51669	0	0	0	0	0	0	0	0	0	0
24958	u	novel	-1.28982	-0.151552	chr16	+	50245021	50245270	MSTRG.13849.1	1	250	MSTRG.13849	.	0	0	0	0	0	0	0	0	0	0	8.996	1.4787
2477	i	novel	-1.14291	-0.0004096	chr1	-	141806688	141807066	MSTRG.1385.1	1	379	MSTRG.1385	ENSSSCG00000023996	17.5303	2.61605	0	0	0	0	1.58311	0.319794	0	0	0	0
24972	i	novel	-1.30762	-0.0004096	chr16	+	51281096	51281751	MSTRG.13856.1	1	656	MSTRG.13856	MRPS36	0	0	0	0	0	0	6.6311	1.3395	0	0	0	0
24974	i	novel	-1.18691	-0.0004096	chr16	-	51292269	51293041	MSTRG.13858.1	1	773	MSTRG.13858	MRPS36	0	0	0	0	6.20957	0.816279	0	0	0	0	9.34929	1.53678
24975	x	novel	-1.01528	-0.0004096	chr16	-	51297009	51303460	MSTRG.13859.1	2	353	MSTRG.13859	MRPS36	2.52146	0.376277	12.2805	1.36505	3.88102	0.510179	4.82719	0.975108	8.6119	1.06909	4.68272	0.769715
2478	i	novel	-1.12385	-0.0004096	chr1	-	141807895	141808790	MSTRG.1386.1	1	896	MSTRG.1386	ENSSSCG00000023996	9.58929	1.43101	0	0	0	0	2.50781	0.506586	0	0	0	0
24988	i	novel	-1.27001	-0.0004096	chr16	-	51377244	51377452	MSTRG.13866.1	1	209	MSTRG.13866	ENSSSCG00000016963	0	0	2.15311	0.239333	0	0	7.17703	1.44978	0	0	0	0
24989	i	novel	-1.33116	-0.0004096	chr16	-	51387857	51388198	MSTRG.13867.1	1	342	MSTRG.13867	ENSSSCG00000016963	12.3626	1.84486	0	0	0	0	0	0	0	0	0	0
24990	i	novel	-1.14073	-0.0004096	chr16	-	51388584	51388976	MSTRG.13868.1	1	393	MSTRG.13868	ENSSSCG00000016963	0	0	0	0	0	0	7.6056	1.53635	0	0	0	0
2479	i	novel	-1.24811	-0.065536	chr1	-	141811519	141812743	MSTRG.1387.1	1	1225	MSTRG.1387	ENSSSCG00000023996	0	0	7.8	0.867023	0	0	0	0	0	0	0	0
24992	x	novel	-1.24263	-0.008192	chr16	-	51395647	51398806	MSTRG.13870.1	1	3160	MSTRG.13870	ENSSSCG00000016963	26.4149	3.94188	0	0	16.6421	2.18768	0	0	0	0	20.4133	3.3554
25003	u	novel	-1.14525	-0.0004096	chr16	-	51677550	51677849	MSTRG.13877.1	1	300	MSTRG.13877	.	11.0733	1.65247	0	0	0	0	0	0	0	0	0	0
25009	u	novel	-1.27538	-0.0004096	chr16	+	51745822	51746197	MSTRG.13881.1	1	376	MSTRG.13881	.	6.3617	0.949354	17.4947	1.94465	4.76596	0.626508	12.367	2.49818	19.1489	2.37718	14.0559	2.31041
25010	u	novel	-1.39862	-0.132301	chr16	+	51747612	51747848	MSTRG.13882.1	1	237	MSTRG.13882	.	17.4599	2.60554	13.5053	1.5012	17.6733	2.32325	10.3882	2.09844	17.5506	2.17876	13.5844	2.23291
25019	u	novel	-1.08547	-0.028672	chr16	+	51942912	51944584	MSTRG.13884.1	1	1673	MSTRG.13884	.	199.716	29.8036	156.898	17.4403	0	0	106.453	21.5038	144.526	17.9417	113.896	18.7215
25020	u	novel	-1.07698	-0.053248	chr16	+	51969777	51970014	MSTRG.13885.1	1	238	MSTRG.13885	.	10.7857	1.60955	4.96218	0.55158	0	0	0	0	0	0	0	0
25023	u	novel	-1.11454	-0.024576	chr16	+	52232376	52232669	MSTRG.13888.1	1	294	MSTRG.13888	.	0	0	0	0	0	0	0	0	0	0	9.2449	1.51962
25024	u	novel	-1.44439	-0.0233472	chr16	+	52243953	52244237	MSTRG.13889.1	1	285	MSTRG.13889	.	7.41754	1.10692	20.1579	2.24069	13.0175	1.71122	16.1789	3.2682	20.8421	2.58737	9.91228	1.62932
2481	i	novel	-1.25746	-0.008192	chr1	-	141817235	141818608	MSTRG.1389.1	1	1374	MSTRG.1389	ENSSSCG00000023996	9.01965	1.346	2.73134	0.303607	0	0	0	0	0	0	0	0
25025	u	novel	-1.12927	-0.057344	chr16	+	52366042	52366285	MSTRG.13890.1	1	244	MSTRG.13890	.	1.23771	0.184702	0	0	2.45902	0.32325	0	0	0	0	9.13525	1.50159
25029	i	novel	-1.09561	-0.057344	chr16	+	52431781	52432311	MSTRG.13895.1	1	531	MSTRG.13895	MAP1B	4.17138	0.622493	10.1695	1.13041	10.7119	1.40813	10.452	2.11133	14.4011	1.78778	9.09981	1.49577
25030	i	novel	-1.20641	-0.094208	chr16	+	52435181	52436763	MSTRG.13896.1	1	1583	MSTRG.13896	MAP1B	9.10677	1.359	18.6639	2.07462	0	0	4.82881	0.975434	0	0	8.75616	1.43928
25040	u	novel	-1.08384	-0.135168	chr16	+	53110236	53116812	MSTRG.13899.1	1	6577	MSTRG.13899	.	10.5615	1.57609	14.9676	1.66375	0	0	3.34149	0.674992	2.54827	0.316346	0	0
25041	u	novel	-1.4117	-0.0004096	chr16	+	53119384	53119701	MSTRG.13900.1	1	318	MSTRG.13900	.	11.8711	1.77151	0	0	0.943396	0.124014	0	0	0	0	0	0
25043	u	novel	-1.13019	-0.02048	chr16	+	53233740	53234475	MSTRG.13901.1	1	736	MSTRG.13901	.	10.2582	1.53082	4.72554	0.525276	0	0	0.611413	0.123507	0	0	0.77761	0.127818
25050	u	novel	-1.33932	-0.21545	chr16	+	53397588	53397909	MSTRG.13905.1	1	322	MSTRG.13905	.	0	0	0	0	0	0	10.1242	2.04512	0	0	0	0
25051	u	novel	-1.39768	-0.0004096	chr16	+	53540007	53540253	MSTRG.13906.1	1	247	MSTRG.13906	.	10.3927	1.5509	0	0	0	0	0	0	0	0	0	0
25055	u	novel	-1.02263	-0.121651	chr16	+	53617752	53618022	MSTRG.13907.1	1	271	MSTRG.13907	.	0	0	0	0	0	0	6.59779	1.33277	0	0	0	0
25052	u	novel	-1.21204	-0.0016384	chr16	+	53611348	53611962	MSTRG.13908.1	1	615	MSTRG.13908	.	1.95935	0.292393	7.56336	0.840718	0	0	7.06341	1.42683	0	0	0	0
25053	u	novel	-1.38775	-0.0004096	chr16	+	53615303	53615505	MSTRG.13909.1	1	203	MSTRG.13909	.	17.8522	2.66408	0	0	0	0	0	0	0	0	0	0
25058	u	novel	-1.43029	-0.151552	chr16	-	53940421	53940683	MSTRG.13913.1	1	263	MSTRG.13913	.	0	0	1.14068	0.126795	0	0	7.3308	1.48084	3.9924	0.495622	4.01901	0.660619
25059	u	novel	-1.40159	-0.13271	chr16	-	54008970	54009212	MSTRG.13914.1	1	243	MSTRG.13914	.	12.9671	1.93507	27.4979	3.05658	12.9424	1.70134	7.40741	1.49632	7.39095	0.917523	9.88477	1.62479
25060	u	novel	-1.39196	-0.115507	chr16	+	54017403	54017624	MSTRG.13915.1	1	222	MSTRG.13915	.	12.2432	1.82706	0	0	0	0	0	0	0	0	0	0
25061	u	novel	-1.4113	-0.148685	chr16	-	54120971	54121223	MSTRG.13916.1	1	253	MSTRG.13916	.	5.37154	0.801593	3.85376	0.428371	1.77866	0.233813	8.88735	1.79527	5.57707	0.692347	16.7115	2.74692
25062	u	novel	-1.10075	-0.111411	chr16	-	54541547	54541770	MSTRG.13917.1	1	224	MSTRG.13917	.	3.88393	0.579597	0	0	6.02679	0.79225	10.7143	2.16432	16.7411	2.07826	12.1339	1.99449
25063	u	novel	-1.29916	-0.110592	chr16	-	54555799	54556022	MSTRG.13918.1	1	224	MSTRG.13918	.	9.4375	1.40836	6.44643	0.716564	13.3929	1.76056	5.35714	1.08216	6.69643	0.831305	7.41518	1.21886
25065	u	novel	-1.10965	-0.06144	chr16	+	54725431	54725829	MSTRG.13919.1	1	399	MSTRG.13919	.	58.5789	8.74171	120.424	13.3859	77.5088	10.1889	51.1992	10.3424	71.7118	8.90241	75.4837	12.4075
25074	u	novel	-1.07293	-0.0724992	chr16	-	54881445	54881749	MSTRG.13920.1	1	305	MSTRG.13920	.	36.6754	5.47306	73.1934	8.13594	59.5705	7.83083	27.1787	5.49018	56.0754	6.96129	44.1869	7.26315
25075	u	novel	-1.19745	-0.140083	chr16	+	54977507	54977738	MSTRG.13921.1	1	232	MSTRG.13921	.	1.30172	0.194256	9.05172	1.00616	1.2931	0.169985	7.75862	1.56726	19.0819	2.36885	12.3664	2.0327
25067	u	novel	-1.19734	-0.0004096	chr16	+	54798800	54799426	MSTRG.13923.1	1	627	MSTRG.13923	.	22.5869	3.37064	0	0	0	0	0	0	0	0	0	0
25069	u	novel	-1.08436	-0.057344	chr16	+	54805337	54809002	MSTRG.13924.2	4	930	MSTRG.13924	.	6.12917	0.914654	6.97505	0.775324	5.47247	0.719383	3.45151	0.697216	6.87119	0.853	5.32225	0.874836
25078	u	novel	-1.11799	-0.0004096	chr16	+	55009398	55009616	MSTRG.13927.1	1	219	MSTRG.13927	.	0	0	0	0	0	0	0	0	14.831	1.84115	0	0
25080	u	novel	-1.12851	-0.02048	chr16	+	55042300	55042575	MSTRG.13929.1	1	276	MSTRG.13929	.	4.34783	0.648824	0	0	6.52174	0.857314	8.1413	1.64457	0	0	0	0
25081	u	novel	-1.06923	-0.0151552	chr16	-	55061853	55062104	MSTRG.13930.1	1	252	MSTRG.13930	.	9.5873	1.43071	0	0	0	0	0	0	0.595238	0.073894	0	0
25082	u	novel	-1.03889	-0.0004096	chr16	-	55099370	55099684	MSTRG.13931.1	1	315	MSTRG.13931	.	0	0	0	0	0	0	0	0	12.381	1.53699	0	0
25085	u	novel	-1.21264	-0.0004096	chr16	-	55110253	55110461	MSTRG.13934.1	1	209	MSTRG.13934	.	9.39234	1.40162	0	0	0	0	0	0	0	0	0	0
25088	u	novel	-1.35401	-0.0008192	chr16	-	55149205	55149494	MSTRG.13937.1	1	290	MSTRG.13937	.	0	0	0	0	0.517241	0.067994	8.27586	1.67175	0	0	0	0
25094	u	novel	-1.13715	-0.002048	chr16	-	55285224	55285762	MSTRG.13940.1	1	539	MSTRG.13940	.	0	0	14.4527	1.60651	4.94991	0.650689	8.58071	1.73333	0	0	10.7143	1.76114
25095	u	novel	-1.04141	-0.0290816	chr16	-	55286612	55291501	MSTRG.13941.1	1	4890	MSTRG.13941	.	2.70982	0.404385	0	0	4.28548	0.563347	4.8319	0.976059	0	0	8.65337	1.42239
25102	u	novel	-1.02596	-0.024576	chr16	-	55531958	55534152	MSTRG.13948.1	1	2195	MSTRG.13948	.	0	0	0	0	1.7096	0.224735	3.12847	0.631961	0	0	0	0
25118	u	novel	-1.0766	-0.1024	chr16	-	55735539	55736690	MSTRG.13953.1	1	1152	MSTRG.13953	.	8.65104	1.29099	0	0	0	0	7.73698	1.56289	12.4913	1.55069	9.04427	1.48664
25133	u	novel	-1.24863	-0.294912	chr16	+	55853044	55853265	MSTRG.13959.1	1	222	MSTRG.13959	.	0	0	22.8041	2.53482	13.7703	1.81017	4.38514	0.885811	15.4324	1.9158	5.36937	0.882582
25145	u	novel	-1.27887	-0.101581	chr16	+	56247344	56247564	MSTRG.13965.1	1	221	MSTRG.13965	.	10.8416	1.61789	0	0	0	0	0	0	0	0	0	0
25147	u	novel	-1.33304	-0.04096	chr16	+	56278243	56279687	MSTRG.13966.1	1	1445	MSTRG.13966	.	0	0	0	0	4.23945	0.557296	0	0	0	0	9.80069	1.61097
25148	u	novel	-1.08782	-0.045056	chr16	+	56280671	56284210	MSTRG.13967.1	1	3540	MSTRG.13967	.	6.39746	0.95469	0	0	0	0	1.68898	0.34118	12.5251	1.55489	0	0
25141	u	novel	-1.11626	-0.04096	chr16	+	56126438	56127350	MSTRG.13971.1	1	913	MSTRG.13971	.	0	0	0	0	0	0	5.5816	1.1275	0	0	10.2574	1.68604
25149	u	novel	-1.19684	-0.0847872	chr16	+	56287357	56289566	MSTRG.13974.1	1	2210	MSTRG.13974	.	4.49728	0.671128	6.94525	0.772011	7.38009	0.970149	3.32579	0.67182	6.87421	0.853374	9.90769	1.62856
25150	u	novel	-1.24629	-0.110592	chr16	+	56291046	56292359	MSTRG.13975.1	1	1314	MSTRG.13975	.	0	0	0	0	0	0	0	0	11.3828	1.41308	0	0
25151	u	novel	-1.13297	-0.049152	chr16	+	56334751	56335782	MSTRG.13976.1	1	1032	MSTRG.13976	.	9.79845	1.46222	0	0	0	0	0	0	0	0	0	0
25164	u	novel	-1.08284	-0.0004096	chr16	+	56664225	56664427	MSTRG.13981.1	1	203	MSTRG.13981	.	0	0	0	0	9.60591	1.26274	0	0	0	0	0	0
25165	u	novel	-1.27631	-0.0004096	chr16	+	56665926	56666305	MSTRG.13982.1	1	380	MSTRG.13982	.	0	0	0	0	0	0	6.54737	1.32259	0	0	0	0
25162	u	novel	-1.23181	-0.004096	chr16	+	56654600	56656870	MSTRG.13985.1	1	2271	MSTRG.13985	.	0	0	0	0	0	0	0	0	0	0	7.74549	1.27315
25163	u	novel	-1.04758	-0.0004096	chr16	+	56658489	56658814	MSTRG.13986.1	1	326	MSTRG.13986	.	0	0	0	0	0	0	0	0	0	0	9.54294	1.56861
25172	u	novel	-1.18531	-0.0028672	chr16	-	56961576	56961852	MSTRG.13989.1	1	277	MSTRG.13989	.	0	0	31.1946	3.46749	0	0	15.1625	3.06286	0	0	0	0
2489	x	novel	-1.01708	-0.036864	chr1	-	142473435	142475484	MSTRG.1399.1	1	2050	MSTRG.1399	FRMD5	10.1629	1.51661	0	0	0	0	0	0	0	0	0	0
25171	u	novel	-1.19501	-0.0479232	chr16	-	56956624	56960744	MSTRG.13992.1	1	4121	MSTRG.13992	.	12.6722	1.89106	0	0	17.3227	2.27716	6.62048	1.33736	0	0	0	0
25183	i	novel	-1.05513	-0.106496	chr16	+	57168254	57168549	MSTRG.13995.1	1	296	MSTRG.13995	RANBP17	54.1993	8.08814	53.1554	5.90858	57.1081	7.50714	18.2432	3.68519	36.3311	4.5102	30.1351	4.95341
25188	x	novel	-1.01629	-0.045056	chr16	+	57502934	57556970	MSTRG.13998.1	4	2092	MSTRG.13998	KCNIP1	25.5856	3.81813	30.8351	3.42753	24.332	3.19856	12.9441	2.61474	25.5398	3.17055	16.0055	2.63088
25207	u	novel	-1.42996	-0.024576	chr16	-	58099413	58099639	MSTRG.14001.1	1	227	MSTRG.14001	.	3.95154	0.589687	0	0	1.32159	0.173729	0	0	3.30396	0.410159	10.5639	1.73642
25193	u	novel	-1.15654	-0.045056	chr16	-	58017281	58021758	MSTRG.14003.1	1	4478	MSTRG.14003	.	6.1341	0.915389	0	0	0	0	6.11512	1.23527	13.6367	1.69288	0	0
25194	u	novel	-1.32316	-0.0045056	chr16	-	58027877	58028255	MSTRG.14004.1	1	379	MSTRG.14004	.	0	0	0	0	0	0	9.75462	1.97046	0	0	0	0
25195	u	novel	-1.19959	-0.012288	chr16	-	58034170	58034778	MSTRG.14005.1	1	609	MSTRG.14005	.	0	0	14.401	1.60076	5.17241	0.679939	7.84893	1.58551	0	0	0	0
25196	x	novel	-1.01947	-0.0221184	chr16	-	58037728	58042468	MSTRG.14006.1	1	4741	MSTRG.14006	LCP2	5.9241	0.884052	0	0	0	0	0	0	9.44083	1.172	10.6429	1.74941
25204	x	novel	-1.2526	-0.0004096	chr16	-	58082110	58082358	MSTRG.14013.1	1	249	MSTRG.14013	LCP2	13.3414	1.99093	3.01205	0.334809	3.01205	0.395948	3.61446	0.730132	2.40964	0.299136	0	0
25222	u	novel	-1.26997	-0.02048	chr16	+	59886106	59886606	MSTRG.14015.1	1	501	MSTRG.14015	.	9.02994	1.34753	0	0	9.8503	1.29487	0	0	0	0	7.80639	1.28316
25223	u	novel	-1.1264	-0.0004096	chr16	+	59887570	59888212	MSTRG.14018.1	1	643	MSTRG.14018	.	0	0	0.108531	0.012064	7.9269	1.04203	6.10047	1.23231	6.68233	0.829554	8.86535	1.45723
25232	u	novel	-1.10776	-0.0004096	chr16	-	59973607	59974982	MSTRG.14023.1	1	1376	MSTRG.14023	.	0	0	8.50145	0.944994	0.993326	0.130578	2.39826	0.484455	0	0	3.84084	0.631332
25233	u	novel	-1.07654	-0.036864	chr16	-	59976532	59976908	MSTRG.14024.1	1	377	MSTRG.14024	.	9.2122	1.37473	0	0	0	0	0.795756	0.160745	0	0	0	0
25234	u	novel	-1.28129	-0.0004096	chr16	+	60053262	60053554	MSTRG.14025.1	1	293	MSTRG.14025	.	12.884	1.92267	0	0	0	0	0	0	0	0	0	0
25239	u	novel	-1.23957	-0.0004096	chr16	-	60098592	60099011	MSTRG.14030.1	1	420	MSTRG.14030	.	13.2595	1.97871	0	0	0	0	0	0	4.25759	0.528544	0	0
25241	u	novel	-1.13043	-0.0954368	chr16	-	60104375	60104630	MSTRG.14032.1	1	256	MSTRG.14032	.	12.9766	1.93649	0	0	0	0	1.75781	0.355083	0	0	1.17969	0.193909
25243	u	novel	-1.20566	-0.131072	chr16	-	60110129	60110764	MSTRG.14033.1	1	636	MSTRG.14033	.	9.83491	1.46766	0	0	0	0	0	0	2.83019	0.351344	0	0
25242	u	novel	-1.10426	-0.073728	chr16	-	60107563	60109253	MSTRG.14034.1	1	1691	MSTRG.14034	.	4.72442	0.705024	13.1626	1.46311	0	0	0	0	0	0	6.15553	1.01181
25244	u	novel	-1.10718	-0.0065536	chr16	-	60112154	60116528	MSTRG.14035.1	1	4375	MSTRG.14035	.	7.01211	1.04642	15.5913	1.73308	0	0	0	0	0	0	4.31132	0.708666
25246	u	novel	-1.18434	-0.08192	chr16	-	60119630	60120946	MSTRG.14037.1	1	1317	MSTRG.14037	.	6.58466	0.982627	0	0	0	0	0	0	3.46469	0.430112	0	0
25248	u	novel	-1.0039	-0.0270336	chr16	-	60123322	60127657	MSTRG.14039.1	1	4336	MSTRG.14039	.	7.81677	1.16649	12.7691	1.41938	7.05696	0.927673	3.67089	0.741532	6.61716	0.821464	5.41282	0.889724
25252	u	novel	-1.13753	-0.0212992	chr16	-	60148684	60150142	MSTRG.14043.1	1	1459	MSTRG.14043	.	12.6182	1.88301	18.281	2.03206	12.7286	1.67323	6.86909	1.38758	6.87731	0.85376	8.76148	1.44015
25277	u	novel	-1.38538	-0.0589824	chr16	-	64883579	64883786	MSTRG.14045.1	1	208	MSTRG.14045	.	0	0	0	0	0	0	6.80288	1.3742	0	0	0.816707	0.134245
25278	u	novel	-1.23258	-0.0417792	chr16	+	65059928	65060165	MSTRG.14046.1	1	238	MSTRG.14046	.	0	0	1.56303	0.173741	1.87815	0.246892	8.18067	1.65252	11.6345	1.44432	8.81513	1.44897
25279	u	novel	-1.04158	-0.053248	chr16	-	65083373	65084067	MSTRG.14047.1	1	695	MSTRG.14047	.	13.0043	1.94063	0	0	6.98561	0.918293	3.45324	0.697564	0	0	0	0
25280	u	novel	-1.18517	-0.004096	chr16	-	65084422	65085401	MSTRG.14048.1	1	980	MSTRG.14048	.	6.45102	0.962683	0	0	0	0	2.38054	0.480876	0	0	8.83571	1.45236
25281	u	novel	-1.11912	-0.0004096	chr16	-	65088216	65088491	MSTRG.14049.1	1	276	MSTRG.14049	.	5.47101	0.816437	10.8696	1.20823	10.8696	1.42886	0	0	0	0	18.0543	2.96766
25282	u	novel	-1.21301	-0.008192	chr16	-	65088847	65089749	MSTRG.14050.1	1	903	MSTRG.14050	.	14.6955	2.193	12.4075	1.37918	6.44297	0.84696	8.60465	1.73817	8.9546	1.11164	10.186	1.67431
25283	u	novel	-1.00236	-0.0004096	chr16	-	65091285	65091838	MSTRG.14051.1	1	554	MSTRG.14051	.	8.45307	1.26145	0	0	0	0	6.49819	1.31265	0	0	5.99639	0.985647
25308	u	novel	-1.42098	-0.04096	chr16	-	65400576	65400807	MSTRG.14055.1	1	232	MSTRG.14055	.	0	0	13.5776	1.50924	5.81897	0.764931	6.89224	1.39225	12.2845	1.52501	4.42672	0.727636
25310	u	novel	-1.17535	-0.0004096	chr16	+	66092156	66092599	MSTRG.14057.1	1	444	MSTRG.14057	.	9.07883	1.35483	0	0	0	0	0	0	0	0	0	0
25311	u	novel	-1.29279	-0.0626688	chr16	+	66099031	66099532	MSTRG.14058.1	1	502	MSTRG.14058	.	0	0	0	0	0	0	7.25896	1.46633	0	0	0	0
25312	u	novel	-1.14038	-0.0004096	chr16	+	66103068	66103416	MSTRG.14059.1	1	349	MSTRG.14059	.	14.1891	2.11744	0	0	0	0	0	0	0	0	0.432665	0.071119
25304	x	novel	-1.09341	-0.053248	chr16	+	65187492	65189483	MSTRG.14066.1	1	1992	MSTRG.14066	CCNG1	37.2505	5.55888	31.121	3.45931	25.5959	3.3647	17.2731	3.48922	24.7159	3.06826	22.3569	3.67489
25306	x	novel	-1.14815	-0.0004096	chr16	+	65190714	65190960	MSTRG.14068.1	1	247	MSTRG.14068	CCNG1	0	0	0	0	0	0	0	0	0	0	13.3279	2.19076
25313	u	novel	-1.26661	-0.0004096	chr16	-	66186180	66186450	MSTRG.14070.1	1	271	MSTRG.14070	.	9.47232	1.41355	0	0	0	0	0	0	1.10701	0.137426	0	0
25315	u	novel	-1.2162	-0.034816	chr16	+	66213823	66214124	MSTRG.14072.1	1	302	MSTRG.14072	.	11	1.64153	0	0	0	0	0	0	0	0	0	0
25317	u	novel	-1.21479	-0.073728	chr16	+	66235229	66235550	MSTRG.14074.1	1	322	MSTRG.14074	.	9.65528	1.44085	0	0	0	0	0	0	0	0	0	0
25318	u	novel	-1.02028	-0.0004096	chr16	+	66235976	66236232	MSTRG.14075.1	1	257	MSTRG.14075	.	1.1751	0.175359	1.16732	0.129755	0	0	6.96498	1.40695	0	0	0	0
25319	u	novel	-1.15604	-0.0004096	chr16	+	66284277	66284477	MSTRG.14076.1	1	201	MSTRG.14076	.	9.76617	1.4574	0	0	0	0	0	0	0	0	0	0
25320	u	novel	-1.37473	-0.0004096	chr16	+	66385053	66385253	MSTRG.14077.1	1	201	MSTRG.14077	.	0	0	2.98508	0.331811	0	0	0	0	11.194	1.38964	0	0
2538	u	novel	-1.40006	-0.0401408	chr1	+	143084540	143084914	MSTRG.1408.1	1	375	MSTRG.1408	.	12.4827	1.86278	0	0	0	0	0	0	0	0	0	0
25344	u	novel	-1.0643	-0.036864	chr16	+	68839860	68842270	MSTRG.14082.1	1	2411	MSTRG.14082	.	0	0	0	0	11.3279	1.4891	4.56781	0.922712	0	0	0	0
25357	u	novel	-1.21068	-0.0765952	chr16	-	69012730	69012968	MSTRG.14083.1	1	239	MSTRG.14083	.	20.7866	3.10198	22.4979	2.50079	19.4435	2.55594	14.3975	2.90834	40.7238	5.05552	36.6192	6.01923
25351	u	novel	-1.01881	-0.0335872	chr16	-	68943048	68944330	MSTRG.14086.1	1	1283	MSTRG.14086	.	9.01871	1.34586	0	0	0	0	0	0	0	0	0	0
25352	u	novel	-1.25619	-0.217088	chr16	+	68945979	68946594	MSTRG.14087.1	1	616	MSTRG.14087	.	9.31494	1.39006	0	0	3.40909	0.448142	0	0	0	0	0	0
25360	u	novel	-1.12129	-0.0004096	chr16	-	69508806	69509006	MSTRG.14090.1	1	201	MSTRG.14090	.	14.7363	2.19909	0	0	0	0	0	0	0	0	0	0
25361	u	novel	-1.11897	-0.032768	chr16	-	69853540	69853879	MSTRG.14091.1	1	340	MSTRG.14091	.	0	0	3.43824	0.382183	0.882353	0.11599	6.60882	1.335	0	0	0	0
25364	i	novel	-1.13646	-0.02048	chr16	-	69958300	69958944	MSTRG.14094.1	1	645	MSTRG.14094	IL12B	3.27752	0.489103	2.32558	0.258504	0	0	6.73023	1.35953	0	0	0	0
25366	u	novel	-1.1861	-0.0774144	chr16	+	70004028	70004277	MSTRG.14095.1	1	250	MSTRG.14095	.	65.232	9.73455	83.96	9.33272	80.24	10.5479	48.42	9.78099	63.876	7.92966	74.2	12.1965
25375	u	novel	-1.30637	-0.08192	chr16	-	70279596	70280408	MSTRG.14097.1	1	813	MSTRG.14097	.	14.6187	2.18154	0	0	0	0	0	0	11.23	1.39411	0	0
25369	u	novel	-1.07356	-0.28672	chr16	+	70064005	70065365	MSTRG.14101.1	1	1361	MSTRG.14101	.	10.7311	1.60139	16.3791	1.82065	13.1543	1.7292	7.14916	1.44415	15.3439	1.90481	10.4291	1.71427
25379	u	novel	-1.32392	-0.073728	chr16	+	71349002	71351655	MSTRG.14104.1	1	2654	MSTRG.14104	.	0	0	12.1613	1.35181	0	0	8.8214	1.78195	14.6745	1.82171	11.6402	1.91333
25380	u	novel	-1.02669	-0.090112	chr16	+	71352145	71368855	MSTRG.14105.1	1	16711	MSTRG.14105	.	10.0042	1.49292	0	0	5.01759	0.659587	6.57884	1.32895	11.0008	1.36565	7.30806	1.20125
25388	u	novel	-1.3077	-0.0004096	chr16	+	71410870	71411160	MSTRG.14106.1	1	291	MSTRG.14106	.	12.4536	1.85845	2.06186	0.229189	0	0	0	0	0	0	0	0
25381	u	novel	-1.01699	-0.069632	chr16	+	71370339	71371907	MSTRG.14107.1	1	1569	MSTRG.14107	.	8.52518	1.27221	0	0	0	0	0	0	10.9458	1.35883	0	0
25399	u	novel	-1.16609	-0.083968	chr16	-	71700255	71700505	MSTRG.14112.1	1	251	MSTRG.14112	.	10.8287	1.61596	26.8486	2.9844	24.4781	3.21776	6.55777	1.32469	4.18327	0.519317	6.01594	0.98886
25416	u	novel	-1.3712	-0.098304	chr16	-	72258390	72258607	MSTRG.14115.1	1	218	MSTRG.14115	.	11.0826	1.65385	16.8165	1.86927	0	0	1.84404	0.372501	10.4312	1.29494	1.38532	0.22771
25421	i	novel	-1.00058	-0.02048	chr16	+	74119064	74119481	MSTRG.14120.1	1	418	MSTRG.14120	ENSSSCG00000017065	0	0	13.11	1.45727	0	0	0	0	0	0	0	0
25425	i	novel	-1.13409	-0.0290816	chr16	-	74194704	74195417	MSTRG.14126.1	1	714	MSTRG.14126	ENSSSCG00000030001	0	0	13.4104	1.49065	6.30252	0.828497	0	0	0	0	0	0
25426	i	novel	-1.16669	-0.0004096	chr16	-	74195756	74196198	MSTRG.14127.1	1	443	MSTRG.14127	ENSSSCG00000030001	10.2257	1.52598	0	0	3.7246	0.489618	1.3544	0.273593	0	0	0	0
25427	i	novel	-1.29778	-0.0004096	chr16	-	74196696	74197117	MSTRG.14128.1	1	422	MSTRG.14128	ENSSSCG00000030001	0	0	0	0	0	0	0	0	0	0	9.66114	1.58803
25445	u	novel	-1.14292	-0.0651264	chr16	+	74405603	74405827	MSTRG.14131.1	1	225	MSTRG.14131	.	0	0	1.33333	0.148209	0	0	6.58667	1.33053	0	0	8.72444	1.43407
25446	u	novel	-1.46725	-0.135578	chr16	+	74424782	74424999	MSTRG.14132.1	1	218	MSTRG.14132	.	12.4679	1.86058	1.37615	0.152968	4.12844	0.542704	0	0	13.7615	1.70837	0.692661	0.113855
25467	u	novel	-1.09592	-0.127386	chr16	+	76397128	76397365	MSTRG.14140.1	1	238	MSTRG.14140	.	8.88235	1.32551	14.895	1.65568	6.15546	0.809166	5.02941	1.01596	3.01261	0.373989	2.48739	0.408862
25476	u	novel	-1.02663	-0.0004096	chr16	+	77536976	77537335	MSTRG.14147.1	1	360	MSTRG.14147	.	18.3056	2.73173	0	0	0	0	6.92778	1.39943	7.08333	0.879336	0	0
25484	u	novel	-1.24684	-0.0004096	chr16	-	77816569	77816824	MSTRG.14152.1	1	256	MSTRG.14152	.	11.207	1.67242	0	0	0	0	0	0	0	0	0	0
25485	u	novel	-1.18393	-0.024576	chr16	-	77824592	77824870	MSTRG.14153.1	1	279	MSTRG.14153	.	8.85663	1.32167	0.537634	0.059762	10.172	1.33716	4.26882	0.862314	7.44444	0.924165	3.24731	0.533772
25492	u	novel	-1.48451	-0.065536	chr16	+	78082098	78082331	MSTRG.14154.1	1	234	MSTRG.14154	.	11.4786	1.71295	22	2.44545	0	0	19.0085	3.83978	24.1453	2.99743	21.8547	3.59233
25502	u	novel	-1.00074	-0.0528384	chr16	+	78150641	78150984	MSTRG.14163.1	1	344	MSTRG.14163	.	4.82849	0.720553	10.8023	1.20075	0	0	7.39535	1.49388	6.44186	0.799702	9.21802	1.5152
25503	u	novel	-1.0558	-0.0004096	chr16	+	78163752	78163974	MSTRG.14164.1	1	223	MSTRG.14164	.	14.2197	2.12201	0	0	0	0	0	0	0	0	0	0
25506	x	novel	-1.20181	-0.0004096	chr16	-	78215090	78230291	MSTRG.14166.1	2	7198	MSTRG.14166	MARCH6	11.3292	1.69065	10.899	1.21149	2.09772	0.275755	9.46765	1.91249	20.869	2.59071	13.2765	2.18231
25507	x	novel	-1.24295	-0.0004096	chr16	-	78219372	78251833	MSTRG.14166.2	2	2641	MSTRG.14166	MARCH6	0.789664	0.117841	1.31589	0.14627	1.24409	0.163542	1.66111	0.33555	2.24453	0.27864	2.40975	0.396098
25508	x	novel	-1.15488	-0.0004096	chr16	-	78220450	78237545	MSTRG.14166.3	2	1990	MSTRG.14166	MARCH6	1.132	0.168928	4.52163	0.502609	3.20669	0.421536	2.66427	0.53819	7.8483	0.9743	3.59749	0.591331
25511	u	novel	-1.27476	-0.065536	chr16	-	78248388	78249093	MSTRG.14169.1	1	706	MSTRG.14169	.	0	0	0	0	5.94901	0.782026	0	0	15.7096	1.95022	0	0
25512	u	novel	-1.07625	-0.0004096	chr16	-	78252405	78252806	MSTRG.14170.1	1	402	MSTRG.14170	.	11.2687	1.68162	0	0	0	0	6.71642	1.35674	0	0	0	0
25514	u	novel	-1.13984	-0.04096	chr16	-	78267458	78268330	MSTRG.14172.1	1	873	MSTRG.14172	.	0	0	0	0	3.17839	0.417815	0	0	33.1198	4.11154	11.3292	1.86221
25527	u	novel	-1.35164	-0.131072	chr16	-	79542643	79542868	MSTRG.14173.1	1	226	MSTRG.14173	.	52.115	7.77711	47.7876	5.31191	59.8208	7.86374	47.1239	9.51917	0	0	64.8097	10.653
2543	u	novel	-1.10894	-0.08192	chr1	-	143129789	143130847	MSTRG.1418.1	1	1059	MSTRG.1418	.	0	0	0	0	0	0	0	0	0	0	8.52597	1.40144
25552	u	novel	-1.14361	-0.049152	chr16	+	81980608	82004068	MSTRG.14188.1	6	1129	MSTRG.14188	.	8.81747	1.31583	8.06438	0.896411	9.22887	1.21318	7.74743	1.565	8.74746	1.08592	10.4953	1.72514
25553	u	novel	-1.13188	-0.0004096	chr16	+	82060054	82060283	MSTRG.14189.1	1	230	MSTRG.14189	.	79.6696	11.8891	125.383	13.9371	106.157	13.9548	78.4174	15.8406	140.383	17.4273	120.474	19.8027
25564	u	novel	-1.15387	-0.0004096	chr16	+	82572312	82572538	MSTRG.14192.1	1	227	MSTRG.14192	.	6.65198	0.992673	23.1278	2.57081	27.0925	3.56144	13.8767	2.80313	13.2159	1.64064	16.3833	2.69297
25565	u	novel	-1.29884	-0.0200704	chr16	-	82603132	82603376	MSTRG.14193.1	1	245	MSTRG.14193	.	0	0	0	0	0	0	4.28571	0.865727	0	0	9.23265	1.5176
25558	u	novel	-1.17594	-0.094208	chr16	-	82540119	82541689	MSTRG.14194.1	1	1571	MSTRG.14194	.	0	0	0	0	10.429	1.37095	7.32336	1.47934	11.3552	1.40965	9.30936	1.53021
25560	u	novel	-1.13666	-0.14336	chr16	-	82547704	82548245	MSTRG.14196.1	1	542	MSTRG.14196	.	7.45203	1.11206	12.9557	1.44012	10.5166	1.38246	6.08856	1.22991	16.0517	1.99268	0	0
25562	u	novel	-1.0562	-0.026624	chr16	-	82551722	82552027	MSTRG.14198.1	1	306	MSTRG.14198	.	3.45425	0.515476	16.1765	1.79812	12.2451	1.60968	4.41176	0.89119	6.37255	0.791098	6.41503	1.05446
[truncated: 11,521 more rows]
