# Supplementary material for: Genome-wide analysis of long non-coding RNA expression profile in porcine circovirus 2-infected intestinal porcine epithelial cell line by RNA sequencing
Source: PeerJ. 2019 Mar 6;7:e6577. doi: 10.7717/peerj.6577 (PMC6408913; doi:10.7717/peerj.6577)
Supplement: Supplemental Information 8 [file peerj-07-6577-s008.xlsx]

## Sheet: Sheet1
t_id	t_name	num_exons	length	gene_id	gene_name	cov.IPEC_B1_B	FPKM.IPEC_B1_B	cov.IPEC_B2_B	FPKM.IPEC_B2_B	cov.IPEC_B3_B	FPKM.IPEC_B3_B	cov.IPEC_A1_A	FPKM.IPEC_A1_A	cov.IPEC_A2_A	FPKM.IPEC_A2_A	cov.IPEC_A3_A	FPKM.IPEC_A3_A	fc	log2(fc)	pval	qval	regulation	significant
50	MSTRG.15.1	1	490	MSTRG.15	.	8.82245	1.78216	21.7286	2.69742	0	0	18.4898	2.75922	21.6429	2.40575	19.5837	2.57437	0.592286	-0.755635	0.336667	0.690493	down	no
59	MSTRG.18.1	1	203	MSTRG.18	.	0	0	0.738916	0.09173	0	0	12.734	1.90029	0	0	0	0	0.814352	-0.296276	0.234924	0.613675	down	no
77	MSTRG.21.1	1	330	MSTRG.21	.	0	0	0	0	8.69394	1.42905	0	0	0	0	0	0	1.3764	0.460901	0.414641	0.718646	up	no
80	MSTRG.23.1	1	259	MSTRG.23	ENSSSCG00000026205	0	0	7.2278	0.89727	8.16216	1.34164	9.6332	1.43756	5.79151	0.643765	9.0193	1.18563	0.82602	-0.275751	0.580722	0.783968	down	no
92	MSTRG.31.1	1	231	MSTRG.31	.	6.49351	1.31171	0	0	0	0	0	0	0	0	0	0	1.32274	0.40353	0.456053	0.719252	up	no
117	MSTRG.41.1	2	1093	MSTRG.41	.	0	0	0.547343	0.067948	0	0	7.67786	1.14576	1.79844	0.199908	6.24656	0.821141	0.637073	-0.650468	0.0579169	0.459939	down	no
130	MSTRG.46.1	1	579	MSTRG.46	.	7.51295	1.51764	21.2435	2.6372	0	0	16.1641	2.41216	26.8946	2.98952	17.2815	2.27174	0.566123	-0.820814	0.282227	0.664002	down	no
132	MSTRG.47.1	1	302	MSTRG.47	.	15.1623	3.06282	14.1589	1.75771	24.8543	4.08539	11.4901	1.71466	40.404	4.49117	13.2616	1.7433	1.08759	0.12114	0.81741	0.918347	up	no
142	MSTRG.56.1	1	2025	MSTRG.56	.	8	1.61602	14.0252	1.74111	9.97235	1.63919	4.74025	0.707385	9.6642	1.07424	0	0	1.77758	0.829913	0.105408	0.459939	up	no
149	MSTRG.60.1	1	235	MSTRG.60	.	7.65958	1.54726	7.02128	0.871632	4.48511	0.737232	7.71064	1.15066	0	0	0.638298	0.083907	1.65626	0.727926	0.0569967	0.459939	up	no
156	MSTRG.66.1	1	968	MSTRG.66	ENSSSCG00000012314	2.1343	0.431135	0	0	0	0	5.92769	0.884586	0	0	6.04029	0.794026	0.782328	-0.354154	0.384993	0.718646	down	no
157	MSTRG.67.1	1	410	MSTRG.67	ENSSSCG00000012314	0	0	0	0	0	0	13.4415	2.00586	0	0	0.365854	0.048093	0.772382	-0.372613	0.0997165	0.459939	down	no
158	MSTRG.62.1	1	2732	MSTRG.62	.	14.6552	2.9604	22.3776	2.77798	17.7031	2.90993	27.7399	4.13962	30.9669	3.44218	30.381	3.99374	0.809688	-0.304561	0.0136779	0.269778	down	no
175	MSTRG.74.1	1	528	MSTRG.74	.	0	0	0	0	0.57197	0.094017	10.2955	1.53639	0	0	0	0	0.843113	-0.246202	0.0885066	0.459939	down	no
176	MSTRG.75.1	1	836	MSTRG.75	.	3.58852	0.724891	7.67823	0.953187	0	0	12.9569	1.93356	0	0	0	0	1.16446	0.219665	0.683147	0.845547	up	no
177	MSTRG.76.1	1	288	MSTRG.76	.	0	0	0	0	2.04167	0.335596	14.1285	2.10839	1.04167	0.115788	0.520833	0.068466	0.808943	-0.30589	0.0464076	0.434928	down	no
185	MSTRG.81.1	1	284	MSTRG.81	.	8.80986	1.77962	14.8099	1.83852	24.2324	3.98316	16.4824	2.45966	17.3169	1.92489	13.6479	1.79408	1.15807	0.211716	0.523538	0.747683	up	no
188	MSTRG.82.1	1	555	MSTRG.82	.	1.86306	0.376344	1.08108	0.134207	0	0	10.3171	1.53962	0	0	0	0	0.943565	-0.0838054	0.75286	0.884284	down	no
194	MSTRG.87.1	1	324	MSTRG.87	.	0	0	0	0	0	0	9.76234	1.45683	0	0	3.24074	0.426011	0.716175	-0.481616	0.089437	0.459939	down	no
198	MSTRG.91.1	1	940	MSTRG.91	.	0	0	0	0	0	0	10.5957	1.5812	6.82019	0.75811	0	0	0.651205	-0.618816	0.132288	0.479889	down	no
199	MSTRG.92.1	1	1035	MSTRG.92	.	0	0	8.67053	1.07637	5.24943	0.862866	15.2483	2.2755	6.7694	0.752465	5.98831	0.787192	0.773089	-0.371293	0.429971	0.719252	down	no
200	MSTRG.93.1	1	281	MSTRG.93	.	6.87545	1.38886	0	0	0	0	0	0	0	0	0	0	1.33732	0.419339	0.456053	0.719252	up	no
202	MSTRG.95.1	1	567	MSTRG.95	.	0.529101	0.10688	0.26455	0.032842	0	0	11.9788	1.7876	4.49735	0.499911	0	0	0.712202	-0.489641	0.149555	0.50927	down	no
203	MSTRG.96.1	1	269	MSTRG.96	.	0	0	15.6283	1.94012	0	0	8.42007	1.25652	0	0	0	0	1.16506	0.220406	0.773003	0.895784	up	no
204	MSTRG.97.1	1	4732	MSTRG.97	.	4.65237	0.939792	0	0	4.66716	0.767157	11.2802	1.68334	9.63714	1.07123	8.29628	1.09059	0.696204	-0.522418	0.194788	0.569759	down	no
205	MSTRG.98.1	1	430	MSTRG.98	.	0	0	0	0	0	0	13.2744	1.98094	0	0	0	0	0.788027	-0.343683	0.122334	0.459939	down	no
207	MSTRG.100.1	1	2725	MSTRG.100	.	0	0	4.3636	0.541703	0	0	9.02826	1.34728	0	0	0	0	0.947879	-0.0772257	0.840395	0.930022	down	no
208	MSTRG.101.1	1	1319	MSTRG.101	.	1.93328	0.390529	8.74905	1.08612	4.34799	0.714694	11.558	1.7248	13.0531	1.45094	11.696	1.53749	0.667837	-0.582431	0.0646874	0.459939	down	no
209	MSTRG.102.1	1	3247	MSTRG.102	.	0	0	5.24607	0.651255	0	0	12.9874	1.9381	0	0	0	0	0.921759	-0.117538	0.797827	0.908249	down	no
210	MSTRG.103.1	1	472	MSTRG.103	.	0	0	0	0	0	0	14.3898	2.14739	0	0	0	0	0.778743	-0.36078	0.122334	0.459939	down	no
211	MSTRG.104.1	1	882	MSTRG.104	.	0	0	0	0	0	0	0	0	0	0	10.7755	1.41649	0.709952	-0.494207	0.344931	0.690493	down	no
212	MSTRG.105.1	1	681	MSTRG.105	.	0	0	0	0	7.46843	1.22761	0	0	0	0	0	0	1.33417	0.415942	0.414641	0.718646	up	no
214	MSTRG.107.1	1	272	MSTRG.107	.	6.61765	1.33678	0	0	0	0	0	0	0	0	0	0	1.32751	0.408726	0.456053	0.719252	up	no
216	MSTRG.109.1	1	536	MSTRG.109	.	0	0	0	0	10.3377	1.69924	0	0	0	0	0	0	1.42966	0.515674	0.414641	0.718646	up	no
218	MSTRG.111.1	1	545	MSTRG.111	.	0	0	0	0	0	0	10.5284	1.57116	0	0	0	0	0.813858	-0.29715	0.122334	0.459939	down	no
221	MSTRG.113.1	1	574	MSTRG.113	.	0	0	0	0	0	0	0	0	6.58614	0.732094	8.55575	1.1247	0.601194	-0.734097	0.014866	0.279012	down	no
222	MSTRG.114.1	1	244	MSTRG.114	.	0	0	0	0	0	0	11.1393	1.66232	0	0	0	0	0.807697	-0.308114	0.122334	0.459939	down	no
229	MSTRG.115.1	1	251	MSTRG.115	.	19.5697	3.95314	28.6853	3.56103	32.9283	5.41254	35.3745	5.27892	27.3785	3.0433	26.2948	3.45658	1.14669	0.197473	0.204136	0.580485	up	no
237	MSTRG.119.1	1	341	MSTRG.119	.	100.411	20.2832	196.534	24.398	123.191	20.2493	73.5073	10.9695	106.416	11.8289	76.7214	10.0854	1.88063	0.91122	0.00484126	0.193076	up	no
246	MSTRG.124.1	1	687	MSTRG.124	RGS17	7.20524	1.45548	0	0	0	0	6.80495	1.0155	0	0	0	0	1.15833	0.21205	0.708576	0.859876	up	no
247	MSTRG.125.1	1	652	MSTRG.125	RGS17	7.36196	1.48714	0	0	0	0	0	0	0	0	0	0	1.35543	0.438754	0.456053	0.719252	up	no
248	MSTRG.126.1	1	302	MSTRG.126	RGS17	0	0	0	0	0	0	10.5	1.56691	0	0	0	0	0.814152	-0.29663	0.122334	0.459939	down	no
249	MSTRG.127.1	1	280	MSTRG.127	RGS17	0	0	0	0	8.52857	1.40187	0	0	0	0	0	0	1.37084	0.455056	0.414641	0.718646	up	no
251	MSTRG.128.1	1	788	MSTRG.128	.	7.71193	1.55783	0	0	0	0	4.98223	0.743497	0	0	0	0	1.21195	0.277333	0.639979	0.820371	up	no
253	MSTRG.130.1	1	229	MSTRG.130	MTRF1L	0	0	0	0	9.89083	1.62579	0	0	0	0	0	0	1.41553	0.501346	0.414641	0.718646	up	no
255	MSTRG.132.1	1	1132	MSTRG.132	.	2.96025	0.597979	0	0	0	0	0	0	16.6564	1.85147	0	0	0.774127	-0.369357	0.566411	0.774757	down	no
290	MSTRG.142.1	1	3402	MSTRG.142	.	0	0	6.46061	0.80203	0	0	11.9309	1.78045	0	0	0	0	0.958215	-0.0615782	0.901924	0.957496	down	no
291	MSTRG.144.1	1	5583	MSTRG.144	.	6.38904	1.29061	0	0	12.8408	2.11068	13.5572	2.02314	9.02669	1.00338	13.3781	1.75862	0.799616	-0.322621	0.592594	0.792264	down	no
293	MSTRG.146.1	1	502	MSTRG.146	.	0	0	0	0	0	0	18.0279	2.69029	7.61155	0.846075	8.34661	1.0972	0.443238	-1.17385	0.00160087	0.14508	down	yes
294	MSTRG.143.1	1	1608	MSTRG.143	.	0	0	6.23756	0.77434	4.85137	0.797436	9.06281	1.35244	0	0	5.2158	0.685642	0.997385	-0.00377695	0.993366	0.997315	down	no
295	MSTRG.147.1	1	271	MSTRG.147	.	0	0	0	0	0	0	10.3137	1.5391	0	0	0	0	0.816088	-0.293203	0.122334	0.459939	down	no
301	MSTRG.151.1	1	210	MSTRG.151	.	1.42857	0.288576	1.42857	0.177345	2.15714	0.354577	1.43809	0.214606	13.5714	1.50856	2.85714	0.375585	0.752484	-0.410268	0.284291	0.666483	down	no
311	MSTRG.154.1	1	327	MSTRG.154	.	5.50459	1.11194	17.8807	2.21974	10.893	1.79051	1.84709	0.275641	1.37615	0.152968	4.58716	0.603004	1.9832	0.987827	0.0326783	0.378775	up	no
313	MSTRG.157.1	1	210	MSTRG.157	.	0	0	0	0	0	0	9.34762	1.39494	0	0	0	0	0.826559	-0.274811	0.122334	0.459939	down	no
329	MSTRG.163.1	1	774	MSTRG.163	.	7.09302	1.43281	8.71318	1.08167	12.0956	1.9882	0	0	0	0	0	0	2.49759	1.32054	0.00452461	0.19163	up	yes
330	MSTRG.166.1	1	297	MSTRG.166	.	2.52525	0.510109	0	0	19.1919	3.15464	0	0	0	0	2.54982	0.335187	1.71262	0.776204	0.363866	0.707418	up	no
336	MSTRG.169.1	1	306	MSTRG.169	.	6.86275	1.3863	0	0	0	0	0	0	0	0	0	0	1.33684	0.418822	0.456053	0.719252	up	no
339	MSTRG.164.1	1	233	MSTRG.164	.	9.65665	1.95067	28.3133	3.51486	21.9571	3.60916	1.29614	0.193422	12.2318	1.35964	2.57511	0.33851	2.41846	1.27409	0.041636	0.415447	up	yes
371	MSTRG.182.1	1	208	MSTRG.182	.	0	0	0	0	9.74519	1.60185	0	0	1.44231	0.160322	1.34615	0.176959	1.24909	0.320879	0.597678	0.794902	up	no
375	MSTRG.186.1	1	345	MSTRG.186	ENSSSCG00000028974	1.73913	0.35131	0	0	12.2551	2.01441	0	0	3.00541	0.334071	0	0	1.46847	0.554313	0.408077	0.718646	up	no
378	MSTRG.188.1	1	558	MSTRG.188	.	0	0	0	0	0	0	10.2778	1.53375	0	0	0	0	0.816464	-0.292539	0.122334	0.459939	down	no
391	MSTRG.193.1	1	724	MSTRG.193	.	0	0	13.4586	1.67077	7.36188	1.2101	6.67403	0.995963	18.7873	2.08833	9.79006	1.28695	0.7193	-0.475335	0.429645	0.719252	down	no
395	MSTRG.196.1	1	413	MSTRG.196	.	8.35351	1.68744	3.53159	0.438416	10.9685	1.80293	9.50605	1.41858	9.37288	1.04186	4.35835	0.572927	1.17683	0.23491	0.543125	0.760454	up	no
397	MSTRG.198.1	1	374	MSTRG.198	EPM2A	6.81818	1.37729	0	0	0	0	0	0	0	0	0	0	1.33515	0.417002	0.456053	0.719252	up	no
407	MSTRG.203.1	1	392	MSTRG.203	.	0	0	0	0	0	0	10.0153	1.49458	0	0	0	0	0.819243	-0.287637	0.122334	0.459939	down	no
409	MSTRG.205.1	1	454	MSTRG.205	.	0	0	0	0	9.97797	1.64011	0	0	0	0	0	0	1.41831	0.504171	0.414641	0.718646	up	no
412	MSTRG.209.1	1	406	MSTRG.209	.	0	0	0	0	0	0	12.6453	1.88706	0	0	0	0	0.793546	-0.333614	0.122334	0.459939	down	no
414	MSTRG.208.1	1	1570	MSTRG.208	.	6.26051	1.26464	8.34586	1.03607	9.76306	1.60479	6.13503	0.915529	8.45987	0.940372	2.19745	0.288866	1.39651	0.481823	0.118237	0.459939	up	no
415	MSTRG.211.1	1	991	MSTRG.211	.	0	0	5.0999	0.633109	0	0	9.59132	1.43131	6.65994	0.740297	0	0	0.76977	-0.3775	0.460165	0.719908	down	no
416	MSTRG.212.1	1	639	MSTRG.212	.	4.25039	0.858592	0	0	8.97965	1.47602	8.48826	1.2667	14.3505	1.59516	0	0	0.97958	-0.0297642	0.964315	0.984497	down	no
417	MSTRG.213.1	1	439	MSTRG.213	.	7.51708	1.51847	0.683371	0.084835	0	0	0	0	0	0	0	0	1.39548	0.480759	0.406894	0.718646	up	no
419	MSTRG.215.1	1	693	MSTRG.215	.	8.65368	1.74807	0	0	10.4574	1.71892	11.1126	1.65832	16.2771	1.8093	7.05339	0.927203	0.837699	-0.255496	0.683542	0.845762	down	no
420	MSTRG.216.1	2	486	MSTRG.216	.	19.3161	3.9019	36.6471	4.54943	30.259	4.97378	18.9404	2.82647	28.1965	3.13423	20.61	2.70928	1.40282	0.488334	0.0221701	0.322904	up	no
439	MSTRG.222.1	1	363	MSTRG.222	.	5.68595	1.14858	12.7603	1.58409	8.73554	1.43589	0	0	0	0	1.23967	0.162961	2.24318	1.16554	0.00211473	0.153482	up	yes
440	MSTRG.223.1	1	1028	MSTRG.223	.	6.62743	1.33876	0	0	11.338	1.86367	14.392	2.14772	11.6415	1.29404	7.61576	1.00113	0.831965	-0.265405	0.62009	0.809001	down	no
446	MSTRG.234.1	1	2259	MSTRG.234	ADAT2	0	0	1.72969	0.214726	0	0	0	0	0	0	13.7446	1.80679	0.710976	-0.492128	0.409842	0.718646	down	no
450	MSTRG.237.1	1	248	MSTRG.237	ENSSSCG00000004136	0	0	0	0	0	0	10.3508	1.54465	0	0	0	0	0.8157	-0.293889	0.122334	0.459939	down	no
451	MSTRG.238.1	1	256	MSTRG.238	.	3.51562	0.710167	0	0	0	0	14.7461	2.20055	0	0	2.92969	0.385122	0.817824	-0.290138	0.484244	0.72218	down	no
452	MSTRG.239.1	1	281	MSTRG.239	.	0	0	0	0	0	0	13.1779	1.96654	0	0	1.98577	0.261039	0.720928	-0.472072	0.0727165	0.459939	down	no
453	MSTRG.240.1	1	202	MSTRG.240	.	0.742574	0.150002	0	0	0	0	9.71782	1.45019	0	0	0	0	0.861735	-0.214684	0.254744	0.635462	down	no
454	MSTRG.241.1	1	372	MSTRG.241	.	0	0	0	0	0	0	12.5188	1.86818	0	0	0	0	0.794683	-0.331549	0.122334	0.459939	down	no
455	MSTRG.242.1	1	591	MSTRG.242	.	2.79188	0.563968	0	0	0	0	12.0085	1.79202	0	0	3.80203	0.499796	0.792919	-0.334755	0.391024	0.718646	down	no
458	MSTRG.245.1	1	296	MSTRG.245	.	0	0	0	0	0	0	9.69257	1.44642	0	0	0	0	0.822734	-0.281502	0.122334	0.459939	down	no
459	MSTRG.246.1	1	875	MSTRG.246	.	0	0	0	0	0	0	12.0651	1.80048	0	0	0	0	0.798834	-0.324033	0.122334	0.459939	down	no
460	MSTRG.247.1	1	371	MSTRG.247	.	3.96226	0.800389	10.0054	1.24208	7.26954	1.19492	9.76819	1.4577	0	0	17.6011	2.31375	1.06742	0.0941234	0.884418	0.94954	up	no
463	MSTRG.250.1	1	619	MSTRG.250	.	0	0	0	0	7.08239	1.16416	0	0	0	0	12.1325	1.59487	0.911829	-0.133164	0.856345	0.936868	down	no
464	MSTRG.251.1	2	2077	MSTRG.251	.	10.9744	2.21686	18.8396	2.33877	12.901	2.12058	24.3315	3.63098	24.0667	2.67518	20.9609	2.75542	0.825681	-0.276343	0.0235482	0.33073	down	no
465	MSTRG.252.1	2	7307	MSTRG.252	.	0	0	8.90618	1.10563	7.77747	1.27841	15.5567	2.32152	10.1219	1.12512	3.10121	0.407669	0.846323	-0.24072	0.659824	0.832026	down	no
467	MSTRG.254.1	1	2167	MSTRG.254	.	3.92939	0.79375	0	0	0.798266	0.131214	10.7785	1.60847	0	0	0	0	1.03077	0.0437162	0.89495	0.954191	up	no
469	MSTRG.259.1	1	2552	MSTRG.259	.	0	0	6.73002	0.835474	0	0	0	0	5.50157	0.611536	7.81034	1.02671	0.758721	-0.398358	0.262296	0.643393	down	no
473	MSTRG.263.1	1	1511	MSTRG.263	.	0	0	0	0	0	0	9.54864	1.42494	0	0	0	0	0.824318	-0.278727	0.122334	0.459939	down	no
475	MSTRG.265.1	1	395	MSTRG.265	.	0	0	0	0	0	0	12.7241	1.89881	0	0	0	0	0.792844	-0.334891	0.122334	0.459939	down	no
476	MSTRG.266.1	1	732	MSTRG.266	.	0	0	0	0	0	0	11.1393	1.66232	0	0	0	0	0.807697	-0.308114	0.122334	0.459939	down	no
477	MSTRG.267.1	1	3470	MSTRG.267	.	0	0	0	0	5.8049	0.954171	9.84467	1.46912	0.961741	0.106904	0	0	1.00406	0.00584031	0.984536	0.993528	up	no
480	MSTRG.258.1	1	907	MSTRG.258	.	2.50971	0.506968	0	0	0	0	9.56946	1.42805	0	0	0	0	0.944978	-0.0816479	0.777446	0.897985	down	no
481	MSTRG.268.1	1	4852	MSTRG.268	.	6.25247	1.26302	0	0	7.55946	1.24257	14.0967	2.10364	15.4567	1.71812	12.7582	1.67712	0.631505	-0.663133	0.219844	0.596946	down	no
482	MSTRG.269.1	1	1715	MSTRG.269	.	4.18426	0.845233	9.16793	1.13812	3.86385	0.635114	10.4901	1.56543	0	0	0	0	1.50489	0.589662	0.112614	0.459939	up	no
488	MSTRG.273.1	1	671	MSTRG.273	.	0	0	12.8361	1.59349	6.72345	1.10516	0	0	0	0	8.78301	1.15457	1.29926	0.377694	0.581205	0.784334	up	no
489	MSTRG.274.1	1	1655	MSTRG.274	.	4.83565	0.976816	11.9495	1.48344	7.19033	1.1819	0	0	14.0634	1.56325	0	0	1.51643	0.600683	0.284182	0.666431	up	no
490	MSTRG.275.1	1	4060	MSTRG.275	.	32.8698	6.63981	69.5931	8.63939	41.9549	6.89628	25.7741	3.84626	22.0409	2.44999	20.9032	2.74783	2.16369	1.11349	0.00624012	0.210126	up	yes
495	MSTRG.276.1	1	410	MSTRG.276	.	1.82927	0.369518	14.9805	1.8597	3.68293	0.605375	0	0	4.7561	0.528672	4.00976	0.527102	1.30434	0.383322	0.326652	0.690493	up	no
497	MSTRG.278.1	1	2746	MSTRG.278	.	5.82156	1.17597	12.1339	1.50633	7.82236	1.28579	12.6358	1.88564	14.1134	1.5688	10.8671	1.42853	0.89716	-0.156563	0.177234	0.550603	down	no
498	MSTRG.279.1	1	1994	MSTRG.279	.	3.60481	0.728184	2.61033	0.32405	6.89067	1.13264	3.61083	0.538843	10.3751	1.15326	0	0	1.15634	0.209566	0.66334	0.833747	up	no
500	MSTRG.282.1	1	534	MSTRG.282	.	4.64045	0.937385	10.5993	1.31581	8.1779	1.34423	6.57584	0.98131	6.32772	0.703368	8.67977	1.141	1.13911	0.187901	0.305178	0.686379	up	no
509	MSTRG.286.1	1	235	MSTRG.286	.	0	0	0	0	0	0	11.566	1.72598	1.2766	0.141902	0	0	0.762649	-0.390909	0.0897254	0.459939	down	no
510	MSTRG.287.1	1	214	MSTRG.287	.	0	0	0	0	0	0	9.87851	1.47416	0	0	0	0	0.820713	-0.285051	0.122334	0.459939	down	no
516	MSTRG.290.1	1	378	MSTRG.290	.	0	0	0	0	0	0	13.9815	2.08645	0	0	0	0	0.782071	-0.354628	0.122334	0.459939	down	no
518	MSTRG.292.1	1	258	MSTRG.292	.	0	0	0	0	2.92636	0.481015	14.6318	2.1835	0	0	0	0	0.894767	-0.160416	0.259876	0.64134	down	no
519	MSTRG.293.1	1	263	MSTRG.293	.	2.83386	0.572448	0	0	0	0	9.18631	1.37087	0	0	0	0	0.963484	-0.0536674	0.86202	0.939722	down	no
533	MSTRG.296.1	1	281	MSTRG.296	.	0	0	2.13523	0.265071	8.24199	1.35476	1.07473	0.160382	0	0	0	0	1.41603	0.50185	0.30912	0.690493	up	no
535	MSTRG.300.1	1	7603	MSTRG.300	NHSL1	5.19177	1.04875	13.2536	1.64532	5.52583	0.9083	0	0	8.31843	0.924649	5.49676	0.722576	1.35129	0.434333	0.0193697	0.305721	up	no
537	MSTRG.302.1	1	527	MSTRG.302	NHSL1	9.10247	1.83873	0	0	0	0	0	0	0	0	0	0	1.41659	0.502425	0.456053	0.719252	up	no
538	MSTRG.303.1	1	261	MSTRG.303	NHSL1	0	0	0	0	0	0	13.2835	1.98229	0	0	0	0	0.787949	-0.343826	0.122334	0.459939	down	no
540	MSTRG.305.1	1	439	MSTRG.305	NHSL1	2.02733	0.409528	0	0	0	0	14.2802	2.13103	2.3918	0.265865	0	0	0.796786	-0.327735	0.320121	0.690493	down	no
541	MSTRG.306.1	1	308	MSTRG.306	NHSL1	7.96753	1.60947	0	0	0	0	1.76694	0.263679	0	0	0	0	1.30879	0.388235	0.525312	0.748674	up	no
542	MSTRG.307.1	1	479	MSTRG.307	NHSL1	0	0	0	0	0	0	12.8894	1.92347	0	0	0	0	0.79138	-0.337558	0.122334	0.459939	down	no
543	MSTRG.308.1	1	224	MSTRG.308	NHSL1	0	0	10.7143	1.33009	4.71875	0.775637	0	0	3.34821	0.372177	0	0	1.40662	0.492229	0.345191	0.690694	up	no
544	MSTRG.309.1	1	291	MSTRG.309	NHSL1	7.2165	1.45775	0	0	1.5567	0.25588	0	0	2.06186	0.229189	0	0	1.35112	0.43416	0.424229	0.719252	up	no
546	MSTRG.311.1	1	258	MSTRG.311	NHSL1	7.55814	1.52677	0	0	0	0	3.51163	0.524039	0	0	4.06977	0.534991	1.05245	0.073753	0.90399	0.95865	up	no
560	MSTRG.318.1	1	230	MSTRG.318	.	6.52174	1.31741	0	0	0	0	0	0	0	0	0	0	1.32383	0.404717	0.456053	0.719252	up	no
574	MSTRG.322.1	1	405	MSTRG.322	.	2.20988	0.446402	0	0	10.4272	1.71395	0.646914	0.096539	0	0	2.22222	0.292122	1.43761	0.523674	0.369614	0.711532	up	no
575	MSTRG.323.1	1	274	MSTRG.323	.	0	0	0	0	0	0	0	0	0	0	12.5766	1.65326	0.68465	-0.546562	0.344931	0.690493	down	no
584	MSTRG.325.1	1	597	MSTRG.325	PDE7B	0	0	8.29146	1.02931	1.51759	0.249451	9.34841	1.39506	0	0	0	0	1.11227	0.153507	0.752377	0.883966	up	no
585	MSTRG.326.1	1	389	MSTRG.326	PDE7B	0	0	0	0	3.49357	0.574251	10.0103	1.49383	0	0	0	0	0.964676	-0.0518834	0.757556	0.886982	down	no
586	MSTRG.327.1	1	986	MSTRG.327	PDE7B	0	0	0	0	0	0	9.56288	1.42707	0	0	1.18053	0.155186	0.779269	-0.359807	0.0736587	0.459939	down	no
587	MSTRG.328.1	1	456	MSTRG.328	PDE7B	0	0	0	0	0	0	10.2303	1.52666	7.875	0.875359	0	0	0.637828	-0.64876	0.142619	0.497278	down	no
590	MSTRG.337.1	1	590	MSTRG.337	.	0	0	2.54237	0.315614	0	0	0	0	13.9695	1.5528	0	0	0.752076	-0.411049	0.43788	0.719252	down	no
594	MSTRG.335.1	1	377	MSTRG.335	.	0	0	0	0	0	0	9.04244	1.3494	0	0	0	0	0.830027	-0.268769	0.122334	0.459939	down	no
699	MSTRG.365.1	1	257	MSTRG.365	.	37.1401	7.50241	63.4669	7.87888	50.8988	8.36641	61.4553	9.17094	74.4553	8.2762	52.9494	6.96046	1.00031	0.000445175	0.996237	0.998488	up	no
700	MSTRG.368.1	1	500	MSTRG.368	.	1.2	0.242404	0	0	2.36	0.387921	10.262	1.53139	0	0	0	0	0.987951	-0.0174892	0.663743	0.833933	down	no
701	MSTRG.367.1	1	208	MSTRG.367	.	7.93269	1.60243	0	0	0	0	0	0	0	0	0	0	1.37609	0.460573	0.456053	0.719252	up	no
702	MSTRG.369.1	1	568	MSTRG.369	.	0	0	2.37676	0.295055	0	0	0	0	12.8574	1.42919	5.01761	0.659589	0.626957	-0.673561	0.038373	0.404309	down	no
703	MSTRG.370.1	1	376	MSTRG.370	.	2.39362	0.483518	5.875	0.729331	0	0	12.6702	1.89077	11.508	1.27919	10.7633	1.41489	0.549512	-0.863778	0.0626228	0.459939	down	no
704	MSTRG.371.1	1	429	MSTRG.371	.	1.38928	0.280638	1.3986	0.173624	3.16783	0.520707	13.8182	2.06208	13.7716	1.5308	9.06294	1.19137	0.531685	-0.911355	0.00418903	0.186837	down	no
706	MSTRG.373.1	1	223	MSTRG.373	.	0	0	0.672646	0.083503	1.35426	0.222604	10.8341	1.61677	2.69058	0.299076	3.36323	0.442113	0.699048	-0.516536	0.0134454	0.268657	down	no
707	MSTRG.374.1	1	1044	MSTRG.374	.	0	0	0	0	0	0	0	0	13.205	1.46782	0	0	0.700756	-0.513016	0.327684	0.690493	down	no
708	MSTRG.375.1	1	217	MSTRG.375	.	0	0	0	0	0	0	11.8295	1.76531	0	0	0	0	0.801038	-0.320057	0.122334	0.459939	down	no
709	MSTRG.376.1	1	216	MSTRG.376	.	0	0	0	0	0	0	0	0	0	0	9.13426	1.20074	0.736204	-0.441822	0.344931	0.690493	down	no
711	MSTRG.378.1	1	483	MSTRG.378	.	1.4824	0.29945	0	0	0	0	13.1077	1.95605	0	0	0	0	0.861601	-0.214908	0.393181	0.718646	down	no
712	MSTRG.379.1	1	1266	MSTRG.379	.	3.90995	0.789822	11.8144	1.46665	0	0	12.6177	1.88293	17.346	1.92812	11.955	1.57154	0.577093	-0.793124	0.171807	0.542927	down	no
719	MSTRG.382.1	1	232	MSTRG.382	ENSSSCG00000004207	1.93965	0.391816	0	0	0	0	0	0	0	0	18.0776	2.37639	0.696233	-0.522357	0.472746	0.719908	down	no
730	MSTRG.385.1	1	206	MSTRG.385	.	177.18	35.7908	259.296	32.1894	222.714	36.6082	440.388	65.719	764.539	84.9836	543.888	71.4968	0.471903	-1.08344	0.00279692	0.167522	down	yes
731	MSTRG.386.1	1	353	MSTRG.386	.	9.30595	1.87983	5.91501	0.734299	8.55524	1.40625	23.7677	3.54685	24.17	2.68666	18.5751	2.44178	0.615068	-0.701183	0.0553816	0.459939	down	no
739	MSTRG.387.1	1	238	MSTRG.387	.	0	0	0	0	3.80672	0.625724	14.5924	2.17762	0	0	0	0	0.925676	-0.111421	0.519113	0.74486	down	no
740	MSTRG.388.1	1	248	MSTRG.388	.	4.83871	0.977434	1.16935	0.145165	0	0	18.2661	2.72585	0	0	0	0	0.98237	-0.025662	0.95611	0.980706	down	no
748	MSTRG.393.1	1	414	MSTRG.393	.	0	0	0	0	0.364734	0.059953	11.3068	1.6873	0	0	0.710145	0.093352	0.795092	-0.330805	0.0654997	0.459939	down	no
749	MSTRG.394.1	1	209	MSTRG.394	.	0	0	0	0	0	0	12.7656	1.905	0	0	0	0	0.792475	-0.335563	0.122334	0.459939	down	no
750	MSTRG.395.1	1	377	MSTRG.395	.	0	0	0	0	0	0	14.8992	2.2234	0	0	0	0	0.774701	-0.368289	0.122334	0.459939	down	no
751	MSTRG.396.1	1	603	MSTRG.396	.	0	0	0	0	0	0	9.00663	1.34406	0	0	0	0	0.83044	-0.268053	0.122334	0.459939	down	no
755	MSTRG.400.1	1	1405	MSTRG.400	TRMT11	0	0	0	0	10.9317	1.79688	0	0	0	0	8.92839	1.17368	1.0712	0.0992345	0.899577	0.956415	up	no
757	MSTRG.402.1	1	2569	MSTRG.402	.	0	0	0	0	9.16933	1.50719	0	0	2.69631	0.299713	7.75477	1.0194	0.955822	-0.0651859	0.921348	0.96606	down	no
760	MSTRG.405.1	1	408	MSTRG.405	HINT3	8.27941	1.67247	12.1225	1.50491	5.55147	0.912514	1.47304	0.219821	6.55882	0.729057	13.9632	1.83554	1.19626	0.25853	0.421712	0.719252	up	no
764	MSTRG.409.1	1	335	MSTRG.409	NCOA7	0	0	0	0	5.15224	0.846891	10.3493	1.54442	0	0	0	0	1.0173	0.0247466	0.922059	0.966262	up	no
765	MSTRG.406.1	1	266	MSTRG.406	.	0	0	0	0	9.08271	1.49296	0	0	3.92481	0.436269	0	0	1.20478	0.268775	0.660892	0.832502	up	no
766	MSTRG.407.1	1	275	MSTRG.407	.	11.4036	2.30357	13.0909	1.62512	12.2255	2.00954	5.43273	0.810724	11.36	1.26274	14.1055	1.85423	1.26228	0.336028	0.171759	0.542894	up	no
768	MSTRG.410.1	1	256	MSTRG.410	.	64.8568	13.1013	146.594	18.1984	71.6393	11.7756	76.3782	11.3979	83.3633	9.26639	73.6797	9.68556	1.37667	0.461178	0.133501	0.481741	up	no
769	MSTRG.411.1	1	295	MSTRG.411	.	15.1458	3.05949	22.2847	2.76646	19.4169	3.19163	8.37627	1.24999	17.1932	1.91114	12.7017	1.6697	1.50818	0.592804	0.00753419	0.219815	up	no
776	MSTRG.414.1	2	622	MSTRG.414	.	5.04984	1.02008	11.3611	1.41039	5.98632	0.983992	14.2926	2.13288	7.80868	0.867987	9.02412	1.18626	0.953155	-0.0692178	0.722684	0.867687	down	no
779	MSTRG.415.1	1	2203	MSTRG.415	.	0	0	0	0	0	0	9.83522	1.46771	0	0	0	0	0.821181	-0.284228	0.122334	0.459939	down	no
802	MSTRG.420.1	1	318	MSTRG.420	.	10.3302	2.08673	19.2799	2.39343	11.8522	1.94819	20.8365	3.10942	10.3459	1.15002	6.60377	0.868098	1.33295	0.414626	0.116224	0.459939	up	no
803	MSTRG.421.1	1	601	MSTRG.421	.	0	0	0	0	10.2879	1.69105	0	0	0	0	0	0	1.4281	0.514095	0.414641	0.718646	up	no
807	MSTRG.423.1	1	457	MSTRG.423	.	0	0	0	0	0	0	15.9803	2.38474	0	0	0	0	0.766492	-0.383656	0.122334	0.459939	down	no
808	MSTRG.425.1	1	412	MSTRG.425	.	6.5534	1.32381	0	0	0	0	0	0	0	0	0	0	1.32505	0.406044	0.456053	0.719252	up	no
830	MSTRG.436.1	1	291	MSTRG.436	CEP85L	2.06186	0.416501	13.9175	1.72774	0	0	0	0	1.03093	0.114595	0	0	1.46349	0.549415	0.331871	0.690493	up	no
862	MSTRG.442.1	1	329	MSTRG.442	.	0	0	0	0	8.24924	1.35596	0	0	0	0	0	0	1.36135	0.445033	0.414641	0.718646	up	no
867	MSTRG.447.1	1	479	MSTRG.447	.	0	0	0	0	0.63048	0.103634	10.0877	1.50538	0	0	0	0	0.848046	-0.237786	0.0854238	0.459939	down	no
871	MSTRG.449.1	2	670	MSTRG.449	ENSSSCG00000025941	3.11045	0.62832	6.80636	0.844951	4.66119	0.766176	0.107463	0.016037	43.609	4.84743	14.2672	1.87549	0.574835	-0.798781	0.125618	0.465998	down	no
873	MSTRG.452.1	1	788	MSTRG.452	.	0	0	6.84212	0.849391	0	0	12.9213	1.92824	3.36826	0.374404	0	0	0.842635	-0.24702	0.647676	0.824701	down	no
876	MSTRG.450.1	1	209	MSTRG.450	.	4.2823	0.865037	12.1005	1.50217	10.0431	1.65081	15.823	2.36125	0	0	11.3541	1.49255	1.24712	0.318603	0.554005	0.766981	up	no
878	MSTRG.453.1	1	204	MSTRG.453	.	3.67647	0.742658	11.0147	1.36738	6.66176	1.09502	5.92157	0.883673	8.08823	0.899062	8.08823	1.06324	1.04472	0.0631157	0.707436	0.859263	up	no
884	MSTRG.455.1	1	221	MSTRG.455	ADGRB3	2.43439	0.491754	4.65158	0.577455	4.7828	0.786166	22.9186	3.42013	0	0	0	0	1.17088	0.227593	0.284721	0.666756	up	no
889	MSTRG.458.1	1	232	MSTRG.458	COL19A1	2.58621	0.522422	6.45259	0.801034	11.0474	1.8159	1.95259	0.291384	10.6638	1.18535	10.9397	1.43807	0.983751	-0.0236353	0.953538	0.979662	down	no
910	MSTRG.463.1	2	8596	MSTRG.463	.	4.5564	0.920406	11.2539	1.39708	8.26562	1.35865	10.8831	1.62407	9.67099	1.075	9.44546	1.24165	0.98341	-0.0241349	0.865606	0.941336	down	no
914	MSTRG.469.1	3	14246	MSTRG.469	ssc-mir-30a	12.0988	2.444	1.96639	0.244111	14.0458	2.30876	13.4157	2.00203	5.69138	0.632635	3.4455	0.452928	1.39462	0.479871	0.386273	0.718646	up	no
915	MSTRG.469.2	3	5886	MSTRG.469	ssc-mir-30a	5.19231	1.04886	40.2254	4.99365	6.76559	1.11208	42.9696	6.41234	61.5702	6.84394	52.7485	6.93405	0.369769	-1.4353	0.0877761	0.459939	down	no
918	MSTRG.466.1	1	310	MSTRG.466	.	0	0	0	0	0	0	12.6645	1.88992	0	0	0	0	0.793375	-0.333926	0.122334	0.459939	down	no
919	MSTRG.470.1	1	1186	MSTRG.470	.	0	0	0	0	0	0	9.91062	1.47896	0	0	6.85835	0.901563	0.63921	-0.645638	0.134805	0.483616	down	no
920	MSTRG.471.1	1	736	MSTRG.471	.	0	0	0	0	0	0	8.61685	1.28589	0	0	0	0	0.835003	-0.260146	0.122334	0.459939	down	no
924	MSTRG.474.1	1	241	MSTRG.474	.	3.73444	0.754368	12.4108	1.54069	4.3693	0.718196	7.46888	1.11458	19.2946	2.14473	9.93361	1.30582	0.762864	-0.390503	0.189512	0.56489	down	no
933	MSTRG.484.1	1	7917	MSTRG.484	.	0	0	9.21056	1.14341	6.30188	1.03586	20.5866	3.07213	16.7664	1.8637	18.2261	2.39591	0.49377	-1.01809	0.0979104	0.459939	down	no
935	MSTRG.486.1	1	644	MSTRG.486	.	0	0	5.69876	0.707452	2.72671	0.448198	15.9441	2.37933	16.0714	1.78645	0	0	0.689471	-0.536439	0.436446	0.719252	down	no
936	MSTRG.487.1	1	43861	MSTRG.487	.	3.47079	0.70111	2.93265	0.364064	0.33481	0.055034	14.4292	2.15326	11.4925	1.27747	2.0724	0.272427	0.686384	-0.542912	0.277798	0.659458	down	no
937	MSTRG.488.1	1	7860	MSTRG.488	.	0	0	0	0	4.19733	0.689929	15.4772	2.30966	11.4518	1.27295	0	0	0.673422	-0.570417	0.302797	0.683656	down	no
938	MSTRG.489.1	1	9882	MSTRG.489	.	3.09806	0.625817	0	0	4.05313	0.666226	11.6411	1.73719	0	0	9.84042	1.29357	0.822096	-0.282621	0.569135	0.77656	down	no
939	MSTRG.490.1	1	8198	MSTRG.490	.	2.53659	0.5124	2.92559	0.363187	1.84374	0.303062	10.8304	1.61622	4.64627	0.516464	8.47804	1.11448	0.71453	-0.484934	0.0824016	0.459939	down	no
940	MSTRG.491.1	1	273	MSTRG.491	.	1.0989	0.221981	6.04396	0.750306	0	0	5.53114	0.825409	12.7363	1.41572	0	0	0.786547	-0.346395	0.553156	0.766302	down	no
942	MSTRG.478.1	1	1257	MSTRG.478	.	0	0	3.49881	0.434347	0	0	13.9857	2.08708	0	0	0	0	0.873378	-0.195322	0.617155	0.807484	down	no
943	MSTRG.479.1	1	2201	MSTRG.479	.	1.54021	0.311127	0	0	0	0	9.49795	1.41738	6.12821	0.681192	7.96229	1.04668	0.557289	-0.843503	0.0189924	0.303129	down	no
945	MSTRG.481.1	1	1350	MSTRG.481	.	0	0	0	0	0	0	11.257	1.67988	4.99524	0.555254	4.37407	0.574993	0.568239	-0.815431	0.00193087	0.149591	down	no
946	MSTRG.482.1	1	634	MSTRG.482	.	1.89274	0.38234	0	0	0	0	0	0	16.6498	1.85074	0	0	0.737636	-0.439019	0.47729	0.719908	down	no
947	MSTRG.493.1	1	2675	MSTRG.493	.	0	0	0	0	0	0	11.6516	1.73876	5.87664	0.653228	5.88072	0.773049	0.527298	-0.923311	0.00111718	0.128819	down	no
948	MSTRG.494.1	1	1133	MSTRG.494	.	1.56113	0.315352	3.42719	0.425456	0	0	0	0	0	0	6.25066	0.82168	0.967731	-0.047322	0.894281	0.954011	down	no
949	MSTRG.495.1	1	269	MSTRG.495	.	0	0	0	0	0	0	9.90335	1.47787	0	0	0	0	0.820445	-0.285522	0.122334	0.459939	down	no
961	MSTRG.496.1	1	351	MSTRG.496	.	19.5897	3.95719	18.7464	2.32721	31.3476	5.15271	11.1852	1.66916	27.8632	3.09719	13.1795	1.73251	1.48727	0.572671	0.230607	0.609243	up	no
964	MSTRG.500.1	1	552	MSTRG.500	DDX43	0	0	0	0	0	0	0	0	0	0	13.4293	1.76535	0.673738	-0.56974	0.344931	0.690493	down	no
979	MSTRG.505.1	1	395	MSTRG.505	.	0	0	0	0	0	0	9.55696	1.42618	0	0	0	0	0.824226	-0.278889	0.122334	0.459939	down	no
980	MSTRG.506.1	1	242	MSTRG.506	.	0	0	0	0	0	0	10.6074	1.58294	0	0	0	0	0.813047	-0.29859	0.122334	0.459939	down	no
984	MSTRG.508.1	7	4731	MSTRG.508	SNORD50	128.606	25.9788	234.371	29.0951	156.288	25.6896	212.858	31.7647	185.732	20.6454	176.411	23.19	1.12332	0.167765	0.266954	0.64811	up	no
993	MSTRG.512.1	1	2029	MSTRG.512	ZNF292	6.53524	1.32014	7.96451	0.988727	8.37851	1.37721	9.82257	1.46582	11.4165	1.26902	0	0	1.32816	0.409426	0.391053	0.718646	up	no
995	MSTRG.514.1	1	5053	MSTRG.514	ZNF292	0	0	0	0	9.85672	1.62018	2.36858	0.353462	0	0	5.74114	0.754701	1.0644	0.0900428	0.888885	0.951558	up	no
996	MSTRG.515.1	1	1350	MSTRG.515	ZNF292	7.21926	1.45831	6.03027	0.748606	0	0	0	0	0	0	0	0	1.60218	0.680039	0.218513	0.595401	up	no
997	MSTRG.516.1	1	271	MSTRG.516	ZNF292	0	0	0	0	8.91513	1.46541	0	0	0	0	0	0	1.38378	0.468616	0.414641	0.718646	up	no
998	MSTRG.517.1	1	321	MSTRG.517	ZNF292	0	0	8.41122	1.04418	0	0	11.2897	1.68476	0	0	0	0	1.00357	0.00514777	0.99277	0.997012	up	no
999	MSTRG.518.1	1	440	MSTRG.518	ZNF292	7.80455	1.57654	0	0	0	0	0	0	0	0	0	0	1.3715	0.45576	0.456053	0.719252	up	no
1020	MSTRG.522.1	1	286	MSTRG.522	.	14.0909	2.84641	10.986	1.36382	0	0	16.3671	2.44246	16.7832	1.86557	17.8042	2.34045	0.644556	-0.633622	0.415148	0.718981	down	no
1031	MSTRG.529.1	1	350	MSTRG.529	.	8.54286	1.72568	0	0	0	0	0	0	0	0	0	0	1.39751	0.482857	0.456053	0.719252	up	no
1032	MSTRG.530.1	1	395	MSTRG.530	.	0	0	0	0	0	0	9.55696	1.42618	0	0	0	0	0.824226	-0.278889	0.122334	0.459939	down	no
1034	MSTRG.532.1	1	2284	MSTRG.532	.	41.799	8.44353	62.1721	7.71813	42.3507	6.96133	51.1419	7.63188	33.6546	3.74093	18.0473	2.3724	1.83071	0.872407	0.038053	0.403082	up	no
1036	MSTRG.534.1	1	532	MSTRG.534	.	0.845865	0.170867	4.78759	0.594339	0	0	11.5056	1.71698	2.09774	0.233178	0	0	0.900323	-0.151486	0.710995	0.860965	down	no
1037	MSTRG.535.1	1	239	MSTRG.535	.	4.38075	0.884925	23.41	2.90616	0	0	3.74059	0.558206	6.2636	0.696241	5.00837	0.658374	1.13624	0.184269	0.789797	0.904864	up	no
1038	MSTRG.536.1	1	470	MSTRG.536	.	13.9149	2.81085	24.0532	2.986	24.8851	4.09045	12.9511	1.93268	23.0319	2.56015	25.934	3.40916	1.15636	0.209588	0.400043	0.718646	up	no
1068	MSTRG.543.1	1	1920	MSTRG.543	.	0	0	3.186	0.395515	2.98542	0.490723	14.7417	2.19989	10.6927	1.18857	0	0	0.728898	-0.456212	0.387948	0.718646	down	no
1070	MSTRG.548.1	1	533	MSTRG.548	.	0	0	0.844278	0.10481	1.69231	0.27817	9.06567	1.35287	0	0	0	0	0.934497	-0.0977379	0.457569	0.719908	down	no
1072	MSTRG.549.1	1	216	MSTRG.549	.	4.16667	0.841679	0	0	0	0	9.78704	1.46052	0	0	2.77778	0.365153	0.892802	-0.163588	0.700767	0.855509	down	no
1075	MSTRG.553.1	1	238	MSTRG.553	BACH2	33.1555	6.6975	70.5042	8.7525	67.2017	11.0462	28.3151	4.22546	28.5042	3.16843	24.2941	3.19358	2.21534	1.14753	0.0112439	0.251575	up	yes
1077	MSTRG.554.1	1	237	MSTRG.554	BACH2	14.1603	2.86043	15.7215	1.95169	11.3165	1.86012	0.464135	0.069263	23.4937	2.61148	12.6118	1.65789	1.29823	0.376547	0.234543	0.613129	up	no
1079	MSTRG.556.1	1	841	MSTRG.556	.	2.67539	0.540436	0	0	0	0	9.3365	1.39328	6.18311	0.687295	4.27705	0.562239	0.653607	-0.613505	0.0939302	0.459939	down	no
1080	MSTRG.557.1	1	291	MSTRG.557	.	0	0	0	0	6.11128	1.00453	9.34021	1.39383	0	0	0	0	1.06178	0.0864784	0.779202	0.899078	up	no
1085	MSTRG.562.1	1	281	MSTRG.562	.	7.47331	1.50963	0	0	0	0	0	0	0	0	0	0	1.35951	0.443089	0.456053	0.719252	up	no
1086	MSTRG.563.1	1	241	MSTRG.563	.	0	0	0	0	0	0	10.6515	1.58951	0	0	0	0	0.812597	-0.299389	0.122334	0.459939	down	no
1087	MSTRG.564.1	3	2076	MSTRG.564	.	10.8713	2.19604	17.8044	2.21027	10.0117	1.64566	4.81213	0.718112	3.33179	0.37035	3.46233	0.45514	2.02899	1.02077	0.00464386	0.191834	up	yes
1088	MSTRG.565.1	1	1050	MSTRG.565	.	6.70381	1.35419	0	0	10.0105	1.64546	1.43809	0.214606	0	0	1.42857	0.187793	1.69343	0.759949	0.222855	0.600448	up	no
1104	MSTRG.569.1	1	313	MSTRG.569	MANEA	0	0	0.958466	0.118985	11.5687	1.90159	0	0	0	0	0	0	1.51875	0.602884	0.359948	0.704017	up	no
1115	MSTRG.574.1	1	260	MSTRG.574	.	0	0	0	0	0	0	9.29231	1.38669	1.15385	0.128258	0	0	0.788806	-0.342257	0.089321	0.459939	down	no
1117	MSTRG.576.1	1	341	MSTRG.576	.	0	0	0	0	0	0	9.74194	1.45379	0	0	0	0	0.822195	-0.282448	0.122334	0.459939	down	no
1118	MSTRG.577.1	1	407	MSTRG.577	.	0	0	2.9484	0.366019	0	0	13.6413	2.03568	4.75676	0.528746	0	0	0.730698	-0.452653	0.303883	0.684963	down	no
1120	MSTRG.579.1	1	323	MSTRG.579	.	7.43034	1.50095	0	0	0	0	0	0	0	0	0	0	1.35794	0.44142	0.456053	0.719252	up	no
1123	MSTRG.581.1	1	314	MSTRG.581	NDUFAF4	2.86624	0.57899	0	0	0	0	14.0935	2.10316	9.07643	1.00891	0	0	0.691339	-0.532534	0.321961	0.690493	down	no
1144	MSTRG.592.1	1	1223	MSTRG.592	.	0	0	13.6877	1.69921	10.4276	1.71403	7.89943	1.17883	9.15781	1.01795	9.80621	1.28907	0.90099	-0.150417	0.807339	0.913173	down	no
1148	MSTRG.595.1	1	2415	MSTRG.595	.	5.80041	1.1717	10.5925	1.31498	9.74617	1.60201	19.0816	2.84754	15.7184	1.74721	13.699	1.8008	0.793418	-0.333846	0.0176772	0.296482	down	no
1161	MSTRG.600.1	1	295	MSTRG.600	.	48.3932	9.77558	76.9322	9.55048	75.6847	12.4406	105.747	15.7807	139.586	15.516	131.495	17.2857	0.67237	-0.572673	0.0268878	0.34843	down	no
1169	MSTRG.607.1	1	2382	MSTRG.607	.	0	0	0	0	0	0	11.8703	1.7714	0	0	0	0	0.800654	-0.320748	0.122334	0.459939	down	no
1170	MSTRG.608.1	1	2009	MSTRG.608	.	5.74763	1.16104	8.4888	1.05381	10.6501	1.75059	12.8118	1.91191	13.3987	1.48936	11.339	1.49056	0.900711	-0.150863	0.320394	0.690493	down	no
1171	MSTRG.610.1	1	223	MSTRG.610	.	0	0	0	0	0	0	10.8341	1.61677	0	0	0	0	0.810743	-0.302683	0.122334	0.459939	down	no
1174	MSTRG.612.1	1	697	MSTRG.612	.	0	0	0	0	4.98278	0.819037	9.7274	1.45162	0	0	6.67719	0.877749	0.798645	-0.324374	0.472024	0.719908	down	no
1175	MSTRG.609.1	1	287	MSTRG.609	.	0	0	0	0	0	0	0	0	2.09059	0.232383	12.0209	1.58021	0.637462	-0.649589	0.184814	0.56077	down	no
1178	MSTRG.614.1	1	403	MSTRG.614	.	5.74938	1.16139	0	0	6.91687	1.13695	10.5993	1.58172	7.97271	0.88622	1.48883	0.195715	1.00457	0.00657519	0.988607	0.995268	up	no
1179	MSTRG.616.1	1	2086	MSTRG.616	.	5.46261	1.10346	0	0	8.43049	1.38575	6.79243	1.01363	0	0	0	0	1.50461	0.589388	0.193403	0.568394	up	no
1180	MSTRG.617.1	1	421	MSTRG.617	.	0	0	0	0	8.60808	1.41494	0	0	0	0	0	0	1.37352	0.457875	0.414641	0.718646	up	no
1181	MSTRG.618.1	1	760	MSTRG.618	.	0	0	0	0	0	0	9.09868	1.35779	0	0	0	0	0.829382	-0.269892	0.122334	0.459939	down	no
1182	MSTRG.615.1	1	241	MSTRG.615	.	0	0	0	0	2.50622	0.411957	12.5311	1.87001	0	0	0	0	0.89963	-0.152596	0.228921	0.607447	down	no
1187	MSTRG.622.1	1	349	MSTRG.622	.	8.59599	1.73642	3.4384	0.426848	0	0	0	0	0	0	0	0	1.56028	0.641803	0.287025	0.669558	up	no
1188	MSTRG.624.1	1	1765	MSTRG.624	.	0	0	0	0	4.13768	0.680124	11.4051	1.70198	4.62594	0.514205	2.03723	0.267803	0.751666	-0.411837	0.171735	0.542894	down	no
1189	MSTRG.625.1	1	468	MSTRG.625	.	7.13248	1.44078	0	0	0	0	4.51709	0.674084	0	0	0	0	1.20377	0.26756	0.63488	0.81697	up	no
1190	MSTRG.623.1	1	2218	MSTRG.623	.	2.92561	0.590982	2.53134	0.314245	4.28765	0.704775	10.2935	1.5361	0	0	5.62308	0.739182	1.01294	0.0185549	0.948305	0.977327	up	no
1201	MSTRG.629.1	1	237	MSTRG.629	.	4.43038	0.89495	17.0886	2.12141	0	0	15.2911	2.28189	27.2025	3.02374	17.7215	2.32958	0.490518	-1.02762	0.147747	0.506678	down	no
1206	MSTRG.632.1	1	248	MSTRG.632	BVES	2.41935	0.488717	10.2702	1.27495	6.08871	1.00082	10.3508	1.54465	13.8992	1.54499	6.64113	0.873009	0.834546	-0.260937	0.400078	0.718646	down	no
1209	MSTRG.634.1	1	219	MSTRG.634	.	0	0	0	0	0	0	11.032	1.6463	0	0	0	0	0.808761	-0.306214	0.122334	0.459939	down	no
1213	MSTRG.638.1	1	528	MSTRG.638	.	0	0	0	0	0	0	9.97538	1.48862	0	0	0	0	0.81967	-0.286884	0.122334	0.459939	down	no
1214	MSTRG.639.1	1	253	MSTRG.639	.	0	0	0	0	0	0	5.82609	0.869425	0	0	0	0	0.872447	-0.196861	0.122334	0.459939	down	no
1215	MSTRG.640.1	1	447	MSTRG.640	.	0	0	4.63087	0.574883	5.90604	0.970796	9.45861	1.41151	0	0	3.02013	0.397011	1.06345	0.0887488	0.818925	0.918913	up	no
1235	MSTRG.641.1	3	2123	MSTRG.641	ENSSSCG00000031023	1135.5	229.375	1491.31	185.134	1517.29	249.401	1.58216	0.236106	0	0	43.7366	5.74939	101.174	6.66069	0.00642109	0.211729	up	yes
1238	MSTRG.642.1	1	240	MSTRG.642	.	3.125	0.63126	3.75	0.465531	8.80833	1.44786	0	0	0	0	1.25	0.164319	1.72215	0.78421	0.0660368	0.459939	up	no
1240	MSTRG.648.1	1	211	MSTRG.648	.	0	0	0.7109	0.088252	10.7346	1.76448	0	0	0	0	0.7109	0.093451	1.42939	0.515402	0.414521	0.718646	up	no
1241	MSTRG.647.1	1	302	MSTRG.647	.	1.98676	0.401331	0	0	0	0	1	0.14923	12.8642	1.42995	0	0	0.765506	-0.385514	0.473873	0.719908	down	no
1244	MSTRG.651.1	1	296	MSTRG.651	.	6.58784	1.33076	0	0	0	0	3.57095	0.532891	0	0	0	0	1.20838	0.273075	0.609662	0.802507	up	no
1246	MSTRG.653.1	1	295	MSTRG.653	.	0	0	0	0	2.04746	0.336548	14.322	2.13727	0	0	0	0	0.865067	-0.209116	0.106139	0.459939	down	no
1247	MSTRG.654.1	1	776	MSTRG.654	.	3.84278	0.776254	0	0	0	0	0	0	10.5554	1.17331	0	0	0.89243	-0.164189	0.763478	0.88993	down	no
1249	MSTRG.656.1	1	274	MSTRG.656	.	31.1533	6.29306	27.7701	3.44742	25.9161	4.25991	9.91971	1.48031	39.4672	4.38704	28.4015	3.73351	1.28813	0.365279	0.312254	0.690493	up	no
1251	MSTRG.658.1	1	263	MSTRG.658	.	0	0	0	0	3.44487	0.566245	9.18631	1.37087	0	0	2.28137	0.299897	0.879324	-0.185533	0.42629	0.719252	down	no
1254	MSTRG.660.1	1	379	MSTRG.660	.	1.97889	0.399742	0	0	0	0	17.5251	2.61526	0	0	0.395778	0.052027	0.828826	-0.270859	0.378863	0.718646	down	no
1255	MSTRG.661.1	1	428	MSTRG.661	.	7.69626	1.55467	0	0	0	0	0	0	0	0	0	0	1.36761	0.451654	0.456053	0.719252	up	no
1265	MSTRG.666.1	1	359	MSTRG.666	.	0	0	0	0	0	0	14.3008	2.13411	0	0	0	0	0.779462	-0.359449	0.122334	0.459939	down	no
1266	MSTRG.667.1	1	382	MSTRG.667	.	0	0	0	0	0	0	0	0	0	0	10.9948	1.44532	0.706691	-0.500848	0.344931	0.690493	down	no
1268	MSTRG.669.1	1	2169	MSTRG.669	.	6.45274	1.30347	8.29415	1.02965	9.15399	1.50467	11.1346	1.66162	13.0498	1.45057	9.59474	1.26128	0.944289	-0.0826999	0.43511	0.719252	down	no
1269	MSTRG.670.1	1	6481	MSTRG.670	.	4.74094	0.957683	0	0	0	0	13.0588	1.94876	0.715939	0.079581	1.17281	0.154172	0.907153	-0.140582	0.750497	0.882851	down	no
1272	MSTRG.672.1	1	312	MSTRG.672	ENSSSCG00000004386	0	0	0	0	0	0	15.4872	2.31115	0	0	0	0	0.770176	-0.37674	0.122334	0.459939	down	no
1275	MSTRG.674.1	1	1004	MSTRG.674	.	0	0	0	0	0	0	0	0	0	0	11.2849	1.48345	0.702458	-0.509515	0.344931	0.690493	down	no
1280	MSTRG.677.1	1	336	MSTRG.677	.	0	0	0	0	8.85417	1.45539	1.73387	0.258744	0	0	0	0	1.31412	0.394094	0.459525	0.719908	up	no
1283	MSTRG.679.1	1	265	MSTRG.679	ARMC2	0	0	0	0	0	0	7.97736	1.19046	4.46038	0.495801	0	0	0.719265	-0.475404	0.121735	0.459939	down	no
1287	MSTRG.682.1	1	269	MSTRG.682	.	6.6803	1.34944	1.07063	0.13291	0	0	0	0	0	0	0	0	1.38172	0.466462	0.376686	0.717302	up	no
1288	MSTRG.683.1	1	331	MSTRG.683	.	4.07855	0.823879	0	0	10	1.64373	5.47432	0.816931	3.62538	0.402985	0.906344	0.119143	1.27547	0.351032	0.470386	0.719908	up	no
1289	MSTRG.684.1	1	245	MSTRG.684	.	7.33469	1.48163	0	0	0	0	0	0	0	0	0	0	1.35443	0.437686	0.456053	0.719252	up	no
1292	MSTRG.687.1	1	1050	MSTRG.687	ENSSSCG00000020883	0	0	0	0	0	0	9.28095	1.38499	0	0	0	0	0.82731	-0.273501	0.122334	0.459939	down	no
1294	MSTRG.689.1	1	502	MSTRG.689	ENSSSCG00000020883	3.48805	0.704596	6.87251	0.853164	0	0	11.239	1.6772	0	0	0	0	1.16434	0.219514	0.661285	0.832696	up	no
1295	MSTRG.690.1	1	252	MSTRG.690	ENSSSCG00000020883	0	0	0	0	11.4603	1.88377	2.91667	0.435253	0	0	0	0	1.35314	0.436316	0.476818	0.719908	up	no
1301	MSTRG.693.1	1	221	MSTRG.693	ENSSSCG00000004415	12.7873	2.58308	49.1041	6.09585	37.5611	6.17404	52.6109	7.8511	61.6561	6.85349	39.2941	5.1654	0.77283	-0.371778	0.43009	0.719252	down	no
1331	MSTRG.703.1	1	334	MSTRG.703	WASF1	0	0	0	0	0	0	17.1796	2.56371	0	0	0	0	0.757927	-0.39987	0.122334	0.459939	down	no
1332	MSTRG.704.1	1	931	MSTRG.704	WASF1	0	0	0	0	0	0	11.1912	1.67006	0	0	0	0	0.807186	-0.309027	0.122334	0.459939	down	no
1333	MSTRG.705.1	1	534	MSTRG.705	WASF1	0	0	0	0	0	0	10.4569	1.56048	0	0	0	0	0.814597	-0.295842	0.122334	0.459939	down	no
1334	MSTRG.706.1	1	1371	MSTRG.706	WASF1	0	0	4.15171	0.5154	1.85213	0.304441	11.1955	1.6707	2.05003	0.227875	0	0	0.930446	-0.104006	0.751845	0.883672	down	no
1341	MSTRG.709.1	1	3364	MSTRG.709	.	7.16855	1.44807	0	0	0	0	7.72057	1.15214	0	0	1.57283	0.206756	1.06046	0.0846875	0.880929	0.948086	up	no
1351	MSTRG.715.1	1	1298	MSTRG.715	.	6.79661	1.37294	0	0	0	0	8.67951	1.29524	0	0	1.849	0.24306	1.02301	0.0328184	0.952419	0.979183	up	no
1352	MSTRG.716.1	1	1545	MSTRG.716	.	6.0712	1.2264	0	0	0	0	13.2822	1.9821	0	0	0	0	1.02927	0.0416183	0.936001	0.972614	up	no
1357	MSTRG.719.1	1	233	MSTRG.719	.	0	0	1.93133	0.239758	0	0	13.6094	2.03093	1.28755	0.14312	0	0	0.795577	-0.329926	0.31424	0.690493	down	no
1362	MSTRG.723.1	1	219	MSTRG.723	.	4.10959	0.830149	10.3562	1.28563	9.2968	1.52815	22.8402	3.40843	28.8904	3.21136	12.1005	1.59066	0.624777	-0.678587	0.0989289	0.459939	down	no
1371	MSTRG.731.1	2	1664	MSTRG.731	.	16.7314	3.37979	14.0377	1.74266	14.7449	2.42367	25.6106	3.82186	25.0559	2.78513	21.2891	2.79855	0.869137	-0.202345	0.411345	0.718646	down	no
1374	MSTRG.726.1	1	11613	MSTRG.726	.	0	0	9.66382	1.19968	12.1033	1.98947	12.3123	1.83736	15.2846	1.69899	11.6802	1.53542	0.709006	-0.496129	0.432666	0.719252	down	no
1375	MSTRG.727.1	1	460	MSTRG.727	.	0	0	12.3435	1.53234	0	0	0	0	0	0	0	0	1.32916	0.410517	0.480118	0.719908	up	no
1376	MSTRG.728.1	1	226	MSTRG.728	.	0	0	0	0	0	0	0	0	0	0	10.3938	1.36632	0.715759	-0.482454	0.344931	0.690493	down	no
1378	MSTRG.733.1	1	344	MSTRG.733	.	6.5407	1.32124	0	0	0	0	0	0	0	0	0	0	1.32456	0.405512	0.456053	0.719252	up	no
1379	MSTRG.734.1	1	394	MSTRG.734	.	0	0	1.52284	0.189048	0	0	9.96447	1.48699	0	0	0	0	0.864432	-0.210175	0.412667	0.718646	down	no
1380	MSTRG.735.1	1	272	MSTRG.735	.	0	0	0	0	0	0	9.99265	1.4912	3.22426	0.358399	0	0	0.726399	-0.461165	0.099261	0.459939	down	no
1381	MSTRG.736.1	2	2038	MSTRG.736	.	5.501	1.11122	0.192331	0.023876	9.80692	1.612	0.325294	0.048543	0	0	0	0	1.80746	0.853964	0.159079	0.525461	up	no
1394	MSTRG.740.1	1	252	MSTRG.740	FYN	3.57143	0.72144	3.57143	0.443363	2.99603	0.492468	2.39683	0.357677	7.7381	0.860141	16.0714	2.11267	0.730497	-0.45305	0.21917	0.596283	down	no
1429	MSTRG.745.1	1	1230	MSTRG.745	.	0	0	11.0846	1.37605	0	0	0	0	0	0	7.37805	0.969881	1.00182	0.00262367	0.996493	0.998568	up	no
1431	MSTRG.747.1	1	410	MSTRG.747	.	0.731707	0.147807	0	0	0	0	11.1146	1.65863	0	0	0	0	0.845986	-0.241295	0.234798	0.613479	down	no
1432	MSTRG.751.1	1	1669	MSTRG.751	.	3.32355	0.671367	11.3068	1.40364	0	0	0	0	8.25225	0.917293	5.55243	0.729894	0.971423	-0.0418284	0.907452	0.960139	down	no
1433	MSTRG.752.1	1	2099	MSTRG.752	.	5.99905	1.21183	9.83373	1.22077	6.38685	1.04983	10.5522	1.5747	9.21059	1.02382	7.5798	0.996402	1.0156	0.0223275	0.791606	0.905646	up	no
1434	MSTRG.755.1	1	233	MSTRG.755	.	0	0	0	0	0	0	15.5536	2.32106	0	0	0	0	0.769674	-0.377681	0.122334	0.459939	down	no
1435	MSTRG.756.1	1	1732	MSTRG.756	.	8.62298	1.74187	0	0	0	0	0	0	0	0	0	0	1.40027	0.485708	0.456053	0.719252	up	no
1436	MSTRG.757.1	1	1243	MSTRG.757	.	5.65085	1.14149	0	0	2.30812	0.379394	0	0	0	0	0	0	1.44767	0.533736	0.245978	0.625639	up	no
1437	MSTRG.758.1	1	300	MSTRG.758	.	0	0	0	0	11.0733	1.82016	0	0	0	0	0	0	1.45239	0.538432	0.414641	0.718646	up	no
1439	MSTRG.760.1	1	968	MSTRG.760	.	0	0	0	0	4.63843	0.762435	14.999	2.23829	0	0	0	0	0.949053	-0.07544	0.716772	0.864319	down	no
1440	MSTRG.761.1	1	2272	MSTRG.761	.	4.02861	0.813791	0	0	4.52421	0.74366	9.22403	1.3765	0	0	7.12588	0.936732	0.954514	-0.0671612	0.878665	0.94708	down	no
1441	MSTRG.762.1	1	462	MSTRG.762	.	0	0	0	0	0	0	0	0	0	0	11.039	1.45113	0.70604	-0.502177	0.344931	0.690493	down	no
1442	MSTRG.763.1	1	2257	MSTRG.763	.	0	0	0	0	4.92955	0.810287	8.86176	1.32244	0	0	0	0	1.03031	0.0430739	0.863983	0.94066	up	no
1443	MSTRG.753.1	1	867	MSTRG.753	.	8.03575	1.62325	0	0	4.26413	0.700909	0	0	0	0	5.01384	0.659094	1.37238	0.456681	0.465863	0.719908	up	no
1444	MSTRG.754.1	1	613	MSTRG.754	.	0	0	0	0	0	0	10.7993	1.61158	0	0	0	0	0.811094	-0.302059	0.122334	0.459939	down	no
1445	MSTRG.764.1	1	524	MSTRG.764	.	3.52863	0.712793	6.81679	0.846247	9.00572	1.4803	9.50954	1.41911	2.86259	0.318197	3.41603	0.449054	1.28268	0.359164	0.0882816	0.459939	up	no
1446	MSTRG.765.1	1	579	MSTRG.765	.	0	0	0	0	9.6494	1.5861	9.6494	1.43998	0	0	3.56822	0.46906	0.99815	-0.00267156	0.99584	0.99836	down	no
1447	MSTRG.767.1	1	263	MSTRG.767	.	3.42205	0.691265	16.2814	2.02119	0	0	0	0	0	0	0	0	1.67197	0.741545	0.25041	0.630845	up	no
1448	MSTRG.768.1	1	218	MSTRG.768	.	4.81651	0.97295	0	0	0	0	11.7752	1.75721	1.37615	0.152968	0	0	0.950827	-0.0727445	0.871739	0.944163	down	no
1450	MSTRG.770.1	1	652	MSTRG.770	.	0	0	0	0	0	0	10.885	1.62436	2.53068	0.281302	0	0	0.734907	-0.444367	0.091685	0.459939	down	no
1453	MSTRG.772.1	1	406	MSTRG.772	.	0	0	0	0	11.1576	1.83402	11.1576	1.66505	0	0	5.17241	0.679939	0.960577	-0.0580267	0.921495	0.966111	down	no
1454	MSTRG.773.1	1	1264	MSTRG.773	.	0	0	0	0	4.42009	0.726546	13.072	1.95073	5.31646	0.59096	4.01345	0.527588	0.679297	-0.557885	0.0921273	0.459939	down	no
1455	MSTRG.774.1	1	265	MSTRG.774	.	0	0	10.198	1.266	0	0	9.09434	1.35715	0	0	3.67924	0.483655	0.914237	-0.12936	0.834147	0.926782	down	no
1456	MSTRG.775.1	1	321	MSTRG.775	.	6.88474	1.39074	0	0	0	0	0	0	0	0	0	0	1.33767	0.419717	0.456053	0.719252	up	no
1458	MSTRG.777.1	1	375	MSTRG.777	.	0	0	0	0	0	0	13.28	1.98177	0	0	0	0	0.787979	-0.343771	0.122334	0.459939	down	no
1459	MSTRG.778.1	1	717	MSTRG.778	.	0	0	8.99582	1.11675	8.0795	1.32805	14.47	2.15936	0	0	0	0	1.32702	0.408188	0.448333	0.719252	up	no
1460	MSTRG.779.1	1	514	MSTRG.779	.	0	0	0	0	9.08949	1.49407	0	0	1.62257	0.180359	0	0	1.30175	0.380448	0.51705	0.743426	up	no
1465	MSTRG.784.1	1	1495	MSTRG.784	.	0	0	0	0	0	0	10.5987	1.58163	0	0	0	0	0.813137	-0.29843	0.122334	0.459939	down	no
1467	MSTRG.787.1	1	281	MSTRG.787	.	6.9395	1.4018	0	0	2.68683	0.441644	3.76157	0.561337	0	0	0	0	1.38675	0.471707	0.327907	0.690493	up	no
1468	MSTRG.788.1	1	501	MSTRG.788	.	0	0	12.7824	1.58683	0	0	0	0	0	0	0	0	1.33786	0.419924	0.480118	0.719908	up	no
1469	MSTRG.785.1	1	362	MSTRG.785	.	0	0	0	0	0	0	9.1768	1.36945	0	0	0	0	0.82849	-0.271443	0.122334	0.459939	down	no
1470	MSTRG.789.1	1	1516	MSTRG.789	.	0	0	0	0	2.72671	0.448198	9.3628	1.39721	0	0	0	0	0.944229	-0.0827919	0.530015	0.751438	down	no
1471	MSTRG.790.1	1	250	MSTRG.790	.	6.6	1.33322	0	0	0	0	0	0	0	0	0	0	1.32684	0.407991	0.456053	0.719252	up	no
1472	MSTRG.791.1	1	1395	MSTRG.791	.	0	0	7.46165	0.9263	0	0	9.28029	1.38489	2.90824	0.323271	0	0	0.905694	-0.142904	0.784655	0.90246	down	no
1473	MSTRG.792.1	1	332	MSTRG.792	.	0	0	0	0	2.2741	0.373801	9.5512	1.42532	4.51807	0.502214	0.903614	0.118784	0.753759	-0.407825	0.118468	0.459939	down	no
1474	MSTRG.793.1	1	219	MSTRG.793	.	0	0	0	0	0	0	12.411	1.85208	0	0	0	0	0.795659	-0.329779	0.122334	0.459939	down	no
1475	MSTRG.794.1	1	219	MSTRG.794	.	0	0	0	0	2.39269	0.393295	9.65297	1.44051	0	0	1.36986	0.180075	0.869802	-0.20124	0.200942	0.577039	down	no
1477	MSTRG.796.1	1	308	MSTRG.796	.	0	0	0	0	0	0	9.79221	1.46129	0	0	0	0	0.821647	-0.283409	0.122334	0.459939	down	no
1478	MSTRG.797.1	1	355	MSTRG.797	.	0	0	0	0	15.9549	2.62257	0	0	0	0	0	0	1.58938	0.668465	0.414641	0.718646	up	no
1479	MSTRG.798.1	1	307	MSTRG.798	.	5.86319	1.18438	0	0	0	0	9.34528	1.39459	0	0	0	0	1.07288	0.101484	0.83867	0.929133	up	no
1480	MSTRG.799.1	1	206	MSTRG.799	.	0	0	0	0	5.86408	0.963898	0	0	0	0	10.1942	1.34007	0.91656	-0.125699	0.846764	0.93266	down	no
1489	MSTRG.801.1	1	725	MSTRG.801	.	9.71035	1.96152	0	0	0	0	5.82231	0.868861	6.34474	0.705261	0	0	1.01603	0.0229462	0.974795	0.989076	up	no
1490	MSTRG.802.1	1	601	MSTRG.802	.	0	0	0	0	0	0	9.54742	1.42476	7.60067	0.844865	0	0	0.647747	-0.626497	0.144178	0.500158	down	no
1495	MSTRG.807.1	1	8735	MSTRG.807	.	4.1834	0.84506	0.721923	0.089621	0.468918	0.077078	10.9958	1.64089	0.921923	0.102478	0	0	1.00728	0.0104589	0.977091	0.990229	up	no
1496	MSTRG.808.1	1	953	MSTRG.808	.	4.62539	0.934343	0	0	0	0	8.98006	1.34009	12.3568	1.37354	0	0	0.736775	-0.440704	0.495779	0.730181	down	no
1502	MSTRG.812.1	1	541	MSTRG.812	.	6.09982	1.23218	12.4769	1.5489	15.061	2.47563	19.2532	2.87315	22.4529	2.49579	16.8817	2.21918	0.787488	-0.34467	0.199083	0.57494	down	no
1503	MSTRG.813.1	1	1041	MSTRG.813	.	4.317	0.872048	7.87896	0.978106	0	0	0	0	0	0	12.7954	1.68202	1.03579	0.0507314	0.93518	0.972346	up	no
1506	MSTRG.815.1	1	358	MSTRG.815	.	0	0	1.67598	0.208058	0	0	9.27933	1.38475	2.51397	0.279444	0	0	0.795588	-0.329906	0.268804	0.650231	down	no
1522	MSTRG.834.1	1	204	MSTRG.834	RWDD2A	0	0	0	0	0	0	9.07843	1.35477	0	0	0	0	0.829614	-0.269488	0.122334	0.459939	down	no
1531	MSTRG.818.1	1	590	MSTRG.818	.	0	0	0	0	2.81525	0.462753	11.4559	1.70956	0	0	0	0	0.922654	-0.116139	0.388648	0.718646	down	no
1533	MSTRG.821.1	1	268	MSTRG.821	ENSSSCG00000025745	0	0	0	0	0	0	12.9478	1.93219	3.91791	0.435502	0	0	0.68596	-0.543803	0.0993145	0.459939	down	no
1535	MSTRG.823.1	1	273	MSTRG.823	ENSSSCG00000025745	0	0	0	0	0.553114	0.090917	13.2747	1.98098	0	0	0	0	0.813099	-0.298497	0.0937652	0.459939	down	no
1537	MSTRG.819.1	1	217	MSTRG.819	.	0	0	2.76498	0.343248	13.4654	2.21336	0	0	0	0	2.76498	0.36347	1.47727	0.562937	0.429277	0.719252	up	no
1545	MSTRG.825.1	1	272	MSTRG.825	.	0	0	0	0	3.88603	0.63876	11.1029	1.65689	0	0	0	0	0.965296	-0.0509563	0.781885	0.901006	down	no
1547	MSTRG.826.1	1	258	MSTRG.826	.	4.36105	0.880945	42.9167	5.32774	10.5349	1.73165	5.4509	0.813436	8.28488	0.92092	0	0	2.11875	1.08321	0.220377	0.597617	up	no
1559	MSTRG.841.1	1	1364	MSTRG.841	.	1.8695	0.377645	0	0	0	0	9.91935	1.48026	0	0	0	0	0.912851	-0.131549	0.59733	0.794783	down	no
1565	MSTRG.844.1	1	245	MSTRG.844	.	22.6531	4.57599	36.1224	4.4843	48.3388	7.94561	25.1878	3.75876	33.6735	3.74303	20.2041	2.65593	1.53299	0.616347	0.115004	0.459939	up	no
1566	MSTRG.845.1	2	1459	MSTRG.845	.	138.203	27.9173	257.093	31.9159	180.111	29.6055	211.237	31.5228	238.34	26.4931	186.202	24.4771	1.10907	0.149347	0.204843	0.581075	up	no
1567	MSTRG.846.1	1	545	MSTRG.846	.	0	0	0	0	0	0	14.1303	2.10866	0	0	0	0	0.78085	-0.356884	0.122334	0.459939	down	no
1568	MSTRG.847.1	1	235	MSTRG.847	.	0	0	0	0	5.76596	0.94777	0	0	0	0	0	0	1.27123	0.346226	0.414641	0.718646	up	no
1569	MSTRG.848.1	1	304	MSTRG.848	.	24.1579	4.87997	48.4112	6.00984	41.5109	6.82328	42.6974	6.37171	0	0	49.3947	6.49318	2.03509	1.0251	0.373495	0.714637	up	no
1570	MSTRG.849.1	1	1940	MSTRG.849	.	0	0	5.40928	0.671516	5.17268	0.850251	11.2052	1.67214	10.951	1.21728	8.89897	1.16981	0.637786	-0.648855	0.135459	0.484708	down	no
1571	MSTRG.850.1	1	3507	MSTRG.850	.	6.55061	1.32324	0	0	7.70202	1.26601	10.6781	1.59349	16.491	1.83309	11.3527	1.49237	0.672657	-0.572056	0.305767	0.687229	down	no
1578	MSTRG.854.1	1	437	MSTRG.854	.	3.27918	0.662404	11.7277	1.45589	11.7414	1.92998	0	0	0	0	13.3501	1.75494	1.55011	0.632372	0.362737	0.706705	up	no
1579	MSTRG.855.1	1	1574	MSTRG.855	.	0	0	0	0	0	0	8.99365	1.34212	0	0	0	0	0.830589	-0.267793	0.122334	0.459939	down	no
1580	MSTRG.856.1	1	1899	MSTRG.856	.	3.49816	0.706638	5.30075	0.658042	0	0	9.11638	1.36043	0	0	0	0	1.15714	0.210558	0.632715	0.815758	up	no
1581	MSTRG.857.1	1	1493	MSTRG.857	.	9.61621	1.9425	6.41259	0.796069	8.98325	1.47661	0	0	0	0	4.49364	0.590711	1.98538	0.989418	0.0662084	0.459939	up	no
1599	MSTRG.862.1	1	245	MSTRG.862	.	0	0	0	0	0	0	0	0	0	0	13.8204	1.81676	0.668938	-0.580057	0.344931	0.690493	down	no
1610	MSTRG.866.1	1	279	MSTRG.866	.	0	0	0	0	0	0	18.4014	2.74604	7.52688	0.836664	0	0	0.590155	-0.760833	0.114756	0.459939	down	no
1611	MSTRG.867.1	1	580	MSTRG.867	.	0	0	0	0	0	0	9.36207	1.3971	0	0	0	0	0.826397	-0.275094	0.122334	0.459939	down	no
1612	MSTRG.868.1	2	1701	MSTRG.868	.	5.13933	1.03816	6.44947	0.800647	9.55497	1.57058	7.03367	1.04963	14.2916	1.58861	8.27237	1.08744	0.942695	-0.0851364	0.719614	0.865675	down	no
1618	MSTRG.873.1	2	876	MSTRG.873	.	2.35502	0.475722	4.38272	0.544078	3.30266	0.542869	9.39041	1.40133	4.67106	0.51922	3.25571	0.427979	0.927769	-0.108163	0.293981	0.675551	down	no
1620	MSTRG.875.1	1	280	MSTRG.875	.	0	0	0	0	1.07857	0.177288	11.6857	1.74385	0	0	0	0	0.850955	-0.232845	0.075455	0.459939	down	no
1623	MSTRG.878.1	1	2506	MSTRG.878	.	0	0	0	0	6.45423	1.0609	0	0	0.792573	0.0881	12.6181	1.65871	0.858496	-0.220117	0.75422	0.884954	down	no
1626	MSTRG.882.1	1	395	MSTRG.882	.	7.97468	1.61091	11.3924	1.41427	6.49114	1.06697	0	0	0	0	0	0	2.34345	1.22864	0.00173294	0.146646	up	yes
1628	MSTRG.884.1	1	968	MSTRG.884	.	0	0	0	0	0	0	9.5155	1.41999	0	0	0	0	0.824685	-0.278085	0.122334	0.459939	down	no
1630	MSTRG.886.1	1	1251	MSTRG.886	.	0	0	9.84013	1.22157	0	0	7.60432	1.13479	0	0	8.7466	1.14978	0.804042	-0.314658	0.642781	0.821859	down	no
1631	MSTRG.880.1	1	278	MSTRG.880	.	84.2266	17.014	152.511	18.9329	137.989	22.6818	232.914	34.7576	251.691	27.9771	254.885	33.5059	0.631574	-0.662977	0.0210342	0.316587	down	no
1661	MSTRG.900.1	1	830	MSTRG.900	.	0	0	0	0	0	0	11.7169	1.7485	0	0	0	0	0.802104	-0.318138	0.122334	0.459939	down	no
1662	MSTRG.901.1	1	960	MSTRG.901	.	3.57708	0.722582	0	0	5.16979	0.849776	11.1677	1.66655	12.2376	1.36029	0	0	0.861527	-0.215033	0.693618	0.851448	down	no
1664	MSTRG.904.1	1	883	MSTRG.904	.	3.90713	0.789253	0	0	0	0	9.23443	1.37805	0	0	0	0	1.00527	0.00757999	0.984103	0.993399	up	no
1671	MSTRG.908.1	1	941	MSTRG.908	.	0	0	0	0	0	0	10.2636	1.53163	0	0	0.7531	0.098999	0.787226	-0.345151	0.0814915	0.459939	down	no
1672	MSTRG.909.1	1	448	MSTRG.909	.	0	0	0	0	0	0	12.1339	1.81074	0	0	0	0	0.798197	-0.325184	0.122334	0.459939	down	no
1673	MSTRG.910.1	1	272	MSTRG.910	.	3.30882	0.668393	0	0	0	0	9.05455	1.35121	14.2279	1.58153	5.33493	0.701302	0.551422	-0.858771	0.0939671	0.459939	down	no
1674	MSTRG.911.1	1	231	MSTRG.911	.	0	0	0	0	0	0	9.80519	1.46322	0	0	0	0	0.821506	-0.283656	0.122334	0.459939	down	no
1675	MSTRG.912.1	1	438	MSTRG.912	.	0	0	0	0	0	0	10.669	1.59212	0	0	6.7169	0.882969	0.635437	-0.65418	0.128739	0.472865	down	no
1676	MSTRG.913.1	1	277	MSTRG.913	.	2.70758	0.54694	2.16607	0.268899	0	0	9.53069	1.42226	0	0	0	0	1.02593	0.0369294	0.909887	0.961055	up	no
1677	MSTRG.914.1	1	1314	MSTRG.914	.	0	0	0	0	0	0	9.1446	1.36465	0	0	0	0	0.828857	-0.270805	0.122334	0.459939	down	no
1678	MSTRG.915.1	1	410	MSTRG.915	.	0	0	3.20488	0.397858	0	0	9.57561	1.42897	0	0	0	0	0.913031	-0.131264	0.695012	0.852231	down	no
1702	MSTRG.925.1	1	307	MSTRG.925	.	21.4463	4.33221	36.0358	4.47354	31.0098	5.09718	21.3257	3.18243	36.0098	4.00273	27.7264	3.64477	1.20676	0.271135	0.0592944	0.459939	up	no
1722	MSTRG.928.1	1	218	MSTRG.928	.	6.81193	1.37603	0	0	0	0	0	0	0	0	0.674312	0.088642	1.29161	0.369174	0.506048	0.736414	up	no
1725	MSTRG.934.1	1	648	MSTRG.934	CTIF	0	0	0	0	0	0	12.1404	1.81171	3.75616	0.417522	0	0	0.695709	-0.523443	0.0994773	0.459939	down	no
1728	MSTRG.937.1	1	488	MSTRG.937	CTIF	2.14549	0.433396	0	0	8.97336	1.47498	9.89549	1.4767	0	0	0	0	1.28221	0.358635	0.317823	0.690493	up	no
1729	MSTRG.938.1	1	484	MSTRG.938	CTIF	0	0	0	0	9.3595	1.53845	11.5434	1.72262	0	0	0	0	1.12398	0.168618	0.698478	0.854125	up	no
1730	MSTRG.939.1	1	324	MSTRG.939	CTIF	8.7963	1.77688	0	0	0	0	0	0	0	0	0	0	1.40622	0.491818	0.456053	0.719252	up	no
1731	MSTRG.940.1	1	250	MSTRG.940	CTIF	7.8	1.57562	0	0	2.416	0.397126	0	0	0	0	0	0	1.54677	0.629259	0.270319	0.651544	up	no
1735	MSTRG.942.1	1	493	MSTRG.942	CTIF	8.1785	1.65208	0	0	0	0	1.83773	0.274243	0	0	0	0	1.3135	0.393416	0.526675	0.749493	up	no
1736	MSTRG.943.1	1	581	MSTRG.943	CTIF	7.22892	1.46026	0	0	0	0	0	0	0	0	0	0	1.35053	0.433522	0.456053	0.719252	up	no
1739	MSTRG.946.1	1	414	MSTRG.946	CTIF	7.45411	1.50575	0	0	0	0	2.7452	0.409666	0	0	0	0	1.26077	0.334305	0.566022	0.774487	up	no
1740	MSTRG.947.1	1	222	MSTRG.947	CTIF	0	0	0	0	0	0	10.8829	1.62405	0	0	0	0	0.810252	-0.303558	0.122334	0.459939	down	no
1745	MSTRG.931.1	1	562	MSTRG.931	.	12.0107	2.42619	20.5125	2.54645	11.2295	1.84584	20.9359	3.12426	20.1228	2.23678	21.6192	2.84195	0.888014	-0.171345	0.354775	0.699195	down	no
1747	MSTRG.950.2	3	1412	MSTRG.950	ENSSSCG00000004508	4.9511	1.00014	0.276763	0.034358	0.184465	0.030321	0	0	0	0	0	0	1.28722	0.364254	0.400935	0.718646	up	no
1760	MSTRG.958.1	1	1148	MSTRG.958	.	0	0	8.69164	1.07899	3.41202	0.560846	11.2753	1.6826	0	0	0	0	1.18434	0.244079	0.614615	0.80585	up	no
1774	MSTRG.967.1	1	261	MSTRG.967	.	38.4368	7.76435	58.5556	7.26917	49.9962	8.21804	99.2337	14.8086	111.222	12.3631	76.9425	10.1145	0.679385	-0.557699	0.00984914	0.242353	down	no
1804	MSTRG.976.1	1	243	MSTRG.976	.	11.6132	2.3459	15.4321	1.91576	9.90947	1.62885	3.72839	0.556387	0	0	0	0	2.67057	1.41715	0.00279555	0.167522	up	yes
1813	MSTRG.982.1	1	550	MSTRG.982	.	23.1527	4.67692	30.9818	3.84613	30.4527	5.00562	42.7873	6.38513	0	0	37.2255	4.89347	1.79217	0.841707	0.396237	0.718646	up	no
1816	MSTRG.984.1	1	270	MSTRG.984	.	0	0	0	0	0	0	9.50741	1.41879	0	0	0	0	0.824775	-0.277928	0.122334	0.459939	down	no
1825	MSTRG.989.1	1	281	MSTRG.989	.	8.54092	1.72529	0	0	0	0	0	0	0	0	0	0	1.39744	0.482788	0.456053	0.719252	up	no
1826	MSTRG.990.1	1	2224	MSTRG.990	.	0	0	9.86331	1.22445	8.71268	1.43213	4.56719	0.68156	7.63264	0.84842	0	0	1.23318	0.302379	0.629705	0.813915	up	no
1827	MSTRG.991.1	1	2077	MSTRG.991	.	0	0	0	0	0	0	6.32643	0.944091	0	0	0	0	0.865026	-0.209184	0.122334	0.459939	down	no
1828	MSTRG.992.1	1	7671	MSTRG.992	.	0	0	0	0	0	0	7.69443	1.14824	0	0	1.46265	0.192273	0.79053	-0.339108	0.0731888	0.459939	down	no
1830	MSTRG.993.1	1	335	MSTRG.993	.	0	0	1.79104	0.222343	0.892537	0.146709	9.91642	1.47982	0	0	0	0	0.916387	-0.125971	0.555483	0.767984	down	no
1833	MSTRG.995.1	1	1562	MSTRG.995	MBD2	0	0	0	0	0	0	10.6818	1.59404	11.3009	1.25617	0	0	0.589665	-0.762032	0.162209	0.53074	down	no
1834	MSTRG.996.1	1	8272	MSTRG.996	MBD2	5.18532	1.04745	8.89519	1.10426	8.05017	1.32323	12.8746	1.92128	15.1925	1.68874	9.13673	1.20107	0.852996	-0.229388	0.13198	0.479347	down	no
1835	MSTRG.997.1	1	1592	MSTRG.997	MBD2	3.16897	0.640142	0	0	3.55779	0.584806	10.755	1.60497	0	0	0	0	1.12985	0.176129	0.368054	0.710449	up	no
1836	MSTRG.998.1	1	1446	MSTRG.998	MBD2	0	0	0	0	0	0	0	0	13.3797	1.48724	9.99032	1.31328	0.504448	-0.987222	0.00477307	0.19253	down	no
1843	MSTRG.1002.1	1	3078	MSTRG.1002	ENSSSCG00000004530	0	0	13.7047	1.70132	11.9493	1.96415	10.6092	1.5832	0	0	8.7498	1.1502	1.21077	0.27592	0.717343	0.864553	up	no
1854	MSTRG.1004.1	1	307	MSTRG.1004	.	0	0	11.2378	1.39508	18.1987	2.99138	0	0	0	0	0.977199	0.128458	2.05198	1.03702	0.228108	0.606919	up	no
1861	MSTRG.1005.1	1	552	MSTRG.1005	.	0	0	0	0	1.06159	0.174498	10.3949	1.55123	0	0	0	0	0.863834	-0.211174	0.0750771	0.459939	down	no
1862	MSTRG.1006.1	1	840	MSTRG.1006	.	5.71429	1.1543	0	0	0	0	9.88691	1.47542	0	0	0	0	1.06022	0.0843615	0.86364	0.940489	up	no
1863	MSTRG.1007.1	1	885	MSTRG.1007	.	0	0	0	0	0	0	10.4079	1.55317	0	0	0	0	0.815106	-0.294941	0.122334	0.459939	down	no
1864	MSTRG.1010.1	1	626	MSTRG.1010	.	2.35144	0.474998	0.71885	0.089239	0	0	10.0607	1.50135	0	0	0	0	0.956896	-0.0635666	0.823214	0.921192	down	no
1865	MSTRG.1011.1	1	283	MSTRG.1011	.	0	0	1.06007	0.131599	0	0	9.60424	1.43324	4.24028	0.471336	0	0	0.734844	-0.44449	0.182705	0.557954	down	no
1866	MSTRG.1012.1	1	293	MSTRG.1012	.	0	0	0	0	0	0	9.27645	1.38432	0	0	0	0	0.82736	-0.273412	0.122334	0.459939	down	no
1867	MSTRG.1013.1	1	289	MSTRG.1013	.	0	0	0	0	0	0	11.4948	1.71537	0	0	0	0	0.804229	-0.314322	0.122334	0.459939	down	no
1868	MSTRG.1014.1	1	227	MSTRG.1014	.	0	0	0	0	0	0	13.7181	2.04714	0	0	0	0	0.784261	-0.350595	0.122334	0.459939	down	no
1870	MSTRG.1015.1	1	266	MSTRG.1015	.	1.69173	0.341734	0	0	0.864662	0.142127	10.7857	1.60955	2.80827	0.312158	2.25564	0.296515	0.76261	-0.390982	0.0612788	0.459939	down	no
1871	MSTRG.1016.1	1	319	MSTRG.1016	.	0.940439	0.189972	2.82132	0.350243	0	0	9.94044	1.48341	1.41066	0.156804	6.4326	0.845597	0.709186	-0.495764	0.21039	0.586847	down	no
1872	MSTRG.1017.1	1	398	MSTRG.1017	.	6.63317	1.33992	0	0	0	0	0	0	0	0	0	0	1.32811	0.409371	0.456053	0.719252	up	no
1874	MSTRG.1019.1	1	347	MSTRG.1019	.	0	0	0	0	0	0	11.5706	1.72668	19.6571	2.18501	13.6369	1.79264	0.341801	-1.54877	0.000156772	0.0807576	down	yes
1875	MSTRG.1020.1	1	540	MSTRG.1020	.	2.5	0.505008	13.6056	1.68901	4.7537	0.781383	0	0	0	0	11.237	1.47716	1.34318	0.425653	0.467987	0.719908	up	no
1876	MSTRG.1021.1	1	236	MSTRG.1021	.	6.94915	1.40375	7.62712	0.946842	0	0	8.87288	1.3241	0	0	7.56356	0.994267	1.04585	0.064676	0.920313	0.965614	up	no
1877	MSTRG.1022.1	1	2939	MSTRG.1022	.	20.8144	4.20457	37.7885	4.69113	25.711	4.2262	53.3862	7.9668	34.2445	3.8065	31.1036	4.08872	0.951492	-0.0717364	0.624277	0.811347	down	no
1879	MSTRG.1024.1	1	317	MSTRG.1024	.	0	0	0	0	0	0	12.8707	1.92068	0	0	0	0	0.791545	-0.337257	0.122334	0.459939	down	no
1880	MSTRG.1025.1	1	380	MSTRG.1025	.	0	0	0	0	0	0	0	0	0	0	13.0263	1.71237	0.678817	-0.558904	0.344931	0.690493	down	no
1881	MSTRG.1026.1	1	359	MSTRG.1026	.	10.0279	2.02566	0	0	11.7772	1.93585	9.25348	1.38089	0	0	0	0	1.76478	0.819486	0.197568	0.572953	up	no
1886	MSTRG.1029.1	1	283	MSTRG.1029	.	0	0	0	0	0	0	9.07067	1.35361	0	0	0	0	0.829703	-0.269333	0.122334	0.459939	down	no
1897	MSTRG.1034.1	1	270	MSTRG.1034	.	0	0	0	0	0	0	11.1852	1.66916	0	0	0.555556	0.073031	0.785453	-0.348403	0.0891062	0.459939	down	no
1898	MSTRG.1036.1	1	504	MSTRG.1036	.	0	0	0	0	0	0	11.3849	1.69897	0	0	0	0	0.805292	-0.312416	0.122334	0.459939	down	no
1899	MSTRG.1037.1	1	4043	MSTRG.1037	.	6.76923	1.3674	9.7393	1.20905	0	0	1.72955	0.258101	5.59139	0.621521	4.24017	0.557391	1.12527	0.170271	0.718648	0.865117	up	no
1900	MSTRG.1038.1	1	291	MSTRG.1038	.	0	0	2.57732	0.319952	0	0	9.62543	1.4364	0	0	0	0	0.896538	-0.157563	0.605228	0.79948	down	no
1913	MSTRG.1045.1	1	387	MSTRG.1045	.	0	0	0	0	0	0	9.36434	1.39744	0	0	0	0	0.826371	-0.275138	0.122334	0.459939	down	no
1922	MSTRG.1063.1	1	428	MSTRG.1063	.	6.65888	1.34511	0	0	0	0	0	0	0	0	2.02804	0.266595	1.21257	0.278064	0.613797	0.805142	up	no
1926	MSTRG.1047.1	1	243	MSTRG.1047	.	0	0	0	0	0	0	11.1852	1.66916	0	0	0	0	0.807245	-0.308921	0.122334	0.459939	down	no
1927	MSTRG.1048.1	1	238	MSTRG.1048	.	0	0	0	0	0	0	12.0546	1.79891	0	0	0	0	0.798931	-0.323857	0.122334	0.459939	down	no
1928	MSTRG.1049.1	1	651	MSTRG.1049	.	5.71429	1.1543	8.06452	1.00114	0	0	9.97389	1.4884	9.57757	1.06461	7.32719	0.963195	0.757684	-0.400331	0.420966	0.719252	down	no
1929	MSTRG.1050.1	1	225	MSTRG.1050	.	0	0	0	0	0	0	0	0	12.6667	1.40799	0	0	0.70756	-0.499076	0.327684	0.690493	down	no
1931	MSTRG.1052.1	1	770	MSTRG.1052	.	6.6039	1.33401	4.48873	0.557237	0	0	0	0	0	0	3.65455	0.480408	1.30504	0.384096	0.44946	0.719252	up	no
1932	MSTRG.1053.1	1	232	MSTRG.1053	.	3.23276	0.653027	0	0	0	0	5.38362	0.803396	16.7802	1.86523	0	0	0.687138	-0.541328	0.425086	0.719252	down	no
1938	MSTRG.1054.1	1	1246	MSTRG.1054	.	0	0	0	0	8.83226	1.45179	4.59865	0.686255	0	0	0	0	1.23228	0.301326	0.533912	0.754434	up	no
1947	MSTRG.1069.1	1	674	MSTRG.1069	.	7.86053	1.58785	0	0	0	0	1.39954	0.208852	0	0	0	0	1.31785	0.398187	0.511957	0.740236	up	no
1950	MSTRG.1072.1	1	335	MSTRG.1072	ENSSSCG00000004560	0	0	0	0	0	0	9.34925	1.39519	0	0	0	0	0.82654	-0.274843	0.122334	0.459939	down	no
1953	MSTRG.1074.1	1	272	MSTRG.1074	.	0	0	0	0	0	0	0	0	12.8566	1.4291	0	0	0.705132	-0.504034	0.327684	0.690493	down	no
1965	MSTRG.1079.1	1	569	MSTRG.1079	.	0	0	14.7575	1.83201	0	0	0	0	0	0	0	0	1.37548	0.459933	0.480118	0.719908	up	no
1969	MSTRG.1081.1	1	918	MSTRG.1081	.	2.12418	0.429091	6.51416	0.808678	0	0	4.1122	0.613662	8.4902	0.943743	0	0	0.936755	-0.0942558	0.845514	0.932111	down	no
1971	MSTRG.1083.1	1	517	MSTRG.1083	.	7.25338	1.46521	0	0	0	0	0	0	0	0	0	0	1.35143	0.434488	0.456053	0.719252	up	no
1983	MSTRG.1091.1	1	406	MSTRG.1091	.	1.10837	0.223895	3.32512	0.412786	10.835	1.78098	0.743842	0.111003	0	0	1.47783	0.194268	1.56762	0.648573	0.225583	0.603836	up	no
1984	MSTRG.1092.1	1	767	MSTRG.1092	.	0	0	0	0	0	0	0	0	0	0	5.08475	0.668415	0.819768	-0.286713	0.344931	0.690493	down	no
1985	MSTRG.1093.1	1	241	MSTRG.1093	.	4.97925	1.00582	0	0	8.77178	1.44185	0	0	0	0	0	0	1.73967	0.798813	0.169804	0.540658	up	no
1986	MSTRG.1094.1	1	1229	MSTRG.1094	.	0	0	4.11554	0.510909	0	0	10.2783	1.53382	0	0	0	0	0.926458	-0.110202	0.774519	0.896699	down	no
1996	MSTRG.1098.1	1	233	MSTRG.1098	.	1.28755	0.26009	0	0	5.83262	0.958727	0	0	0	0	15.4378	2.02937	0.894807	-0.160351	0.828564	0.92399	down	no
2024	MSTRG.1107.1	1	364	MSTRG.1107	RORA	6.58791	1.33078	0	0	9.53297	1.56697	0	0	2.37363	0.263845	0	0	1.69829	0.764084	0.238733	0.617531	up	no
2025	MSTRG.1108.1	1	317	MSTRG.1108	RORA	0	0	0	0	0	0	10.0032	1.49277	0	0	0.946372	0.124405	0.782908	-0.353084	0.0769533	0.459939	down	no
2060	MSTRG.1128.1	1	482	MSTRG.1128	RNF111	7.71784	1.55903	0	0	0	0	0	0	0	0	0	0	1.36839	0.452475	0.456053	0.719252	up	no
2061	MSTRG.1129.1	1	2071	MSTRG.1129	RNF111	3.17431	0.641221	4.59268	0.570143	0	0	9.74457	1.45418	0	0	3.40415	0.447493	0.964774	-0.0517366	0.903173	0.958235	down	no
2062	MSTRG.1130.1	1	702	MSTRG.1130	RNF111	0	0	0	0	4.27208	0.702216	8.17165	1.21945	12.9915	1.44409	7.05128	0.926925	0.554959	-0.849548	0.0728438	0.459939	down	no
2063	MSTRG.1131.1	1	680	MSTRG.1131	RNF111	0	0	0	0	9.03677	1.4854	5.03824	0.751854	0	0	0	0	1.22807	0.296389	0.542807	0.760247	up	no
2064	MSTRG.1132.1	1	1749	MSTRG.1132	RNF111	5.02802	1.01568	9.12293	1.13253	7.53859	1.23914	3.53974	0.528234	0	0	5.20263	0.683911	1.58603	0.665422	0.080544	0.459939	up	no
2065	MSTRG.1133.1	1	408	MSTRG.1133	RNF111	1.47059	0.297063	0	0	0	0	13.1887	1.96815	0	0	0	0	0.860306	-0.217078	0.388535	0.718646	down	no
2066	MSTRG.1134.1	1	1391	MSTRG.1134	RNF111	0	0	7.44069	0.923698	7.00503	1.15144	0	0	2.43638	0.27082	0	0	1.46493	0.550829	0.28354	0.665656	up	no
2067	MSTRG.1135.1	1	340	MSTRG.1135	RNF111	4.83235	0.97615	0	0	12.8794	2.11703	0	0	0	0	0	0	1.89004	0.918416	0.187566	0.563415	up	no
2068	MSTRG.1136.1	1	423	MSTRG.1136	RNF111	5.9078	1.19339	0	0	9.93853	1.63363	3.10638	0.463564	0	0	0	0	1.69499	0.76128	0.178498	0.552295	up	no
2074	MSTRG.1125.1	1	1047	MSTRG.1125	ENSSSCG00000004592	9.2149	1.86144	0	0	0	0	0	0	24.6772	2.74303	0	0	0.844797	-0.243323	0.799097	0.908897	down	no
2075	MSTRG.1126.1	1	512	MSTRG.1126	ENSSSCG00000004592	0	0	0	0	0	0	11.2567	1.67983	21.0294	2.33756	15.1816	1.9957	0.32778	-1.6092	9.2313e-05	0.0747521	down	yes
2087	MSTRG.1142.1	1	317	MSTRG.1142	.	0	0	0	0	0	0	13.5757	2.0259	0	0	0	0	0.785458	-0.348393	0.122334	0.459939	down	no
2090	MSTRG.1144.1	1	726	MSTRG.1144	.	0	0	0	0	0	0	8.04959	1.20124	0	0	0	0	0.841904	-0.248272	0.122334	0.459939	down	no
2095	MSTRG.1147.1	1	238	MSTRG.1147	ENSSSCG00000004596	23.1345	4.67323	37.626	4.67095	47.1471	7.74972	69.5126	10.3733	103.647	11.5211	90.9244	11.9525	0.533659	-0.90601	0.037321	0.399601	down	no
2096	MSTRG.1148.1	1	211	MSTRG.1148	.	9.24171	1.86685	11.3744	1.41204	10.5498	1.7341	0	0	0.7109	0.079021	4.2654	0.560708	2.18253	1.126	0.0138948	0.2711	up	yes
2101	MSTRG.1149.1	1	235	MSTRG.1149	.	9.48511	1.91602	0	0	10.1957	1.67591	12.7319	1.89998	0	0	2.54043	0.333951	1.44404	0.530111	0.348568	0.693285	up	no
2104	MSTRG.1151.1	4	691	MSTRG.1151	MYZAP	2.8987	0.585546	13.0003	1.61387	13.9899	2.29956	14.2967	2.13349	4.7377	0.526627	12.152	1.59743	1.09592	0.132142	0.78002	0.899527	up	no
2111	MSTRG.1157.1	1	273	MSTRG.1157	.	0	0	0	0	0	0	9.40293	1.4032	0	0	0	0	0.825939	-0.275893	0.122334	0.459939	down	no
2112	MSTRG.1158.1	1	224	MSTRG.1158	.	0	0	0	0	0	0	9.4375	1.40836	0	0	0	0	0.825553	-0.276568	0.122334	0.459939	down	no
2113	MSTRG.1159.1	1	434	MSTRG.1159	.	6.91244	1.39633	0	0	0	0	7.64747	1.14123	0	0	0	0	1.13388	0.181268	0.742969	0.878545	up	no
2120	MSTRG.1204.1	1	2176	MSTRG.1204	CH242-58J12.2	0	0	0	0	4.21737	0.693224	0	0	0	0	0	0	1.20873	0.273494	0.414641	0.718646	up	no
2121	MSTRG.1205.1	1	1329	MSTRG.1205	CH242-58J12.2	0	0	0	0	0	0	0	0	11.0612	1.22953	6.19812	0.814773	0.578682	-0.789157	0.0103494	0.246403	down	no
2122	MSTRG.1206.1	1	840	MSTRG.1206	CH242-58J12.2	5.88571	1.18893	4.45714	0.553316	0	0	4.63424	0.691566	0	0	0	0	1.3254	0.406424	0.41054	0.718646	up	no
2123	MSTRG.1207.1	1	1967	MSTRG.1207	CH242-58J12.2	0	0	7.0914	0.880338	0	0	14.6151	2.18101	0	0	0	0	0.942697	-0.0851334	0.87595	0.945829	down	no
2126	MSTRG.1209.1	1	256	MSTRG.1209	CH242-58J12.2	0	0	0	0	8.25781	1.35736	0	0	0	0	0	0	1.36164	0.445343	0.414641	0.718646	up	no
2127	MSTRG.1210.1	1	311	MSTRG.1210	CH242-58J12.2	0	0	0	0	0	0	9.71061	1.44911	0	0	0	0	0.822537	-0.281848	0.122334	0.459939	down	no
2128	MSTRG.1211.1	1	310	MSTRG.1211	CH242-58J12.2	0	0	0	0	0	0	11.6903	1.74454	0	0	0	0	0.802357	-0.317685	0.122334	0.459939	down	no
2129	MSTRG.1212.1	1	335	MSTRG.1212	CH242-58J12.2	0	0	0	0	9.01492	1.48181	0	0	0	0	0	0	1.38709	0.47206	0.414641	0.718646	up	no
2130	MSTRG.1213.1	1	1860	MSTRG.1213	CH242-58J12.2	0	0	0	0	0	0	9.31183	1.3896	0	0	0	0	0.826961	-0.274108	0.122334	0.459939	down	no
2132	MSTRG.1215.1	1	676	MSTRG.1215	CH242-58J12.2	0	0	0	0	0	0	8.26479	1.23335	0	0	15.2663	2.00683	0.547351	-0.869461	0.202811	0.579036	down	no
2133	MSTRG.1216.1	1	268	MSTRG.1216	CH242-58J12.2	0	0	0	0	0	0	13.6493	2.03687	0	0	0	0	0.784838	-0.349533	0.122334	0.459939	down	no
2134	MSTRG.1217.1	1	1379	MSTRG.1217	CH242-58J12.2	0	0	0	0	0	0	0	0	1.03776	0.115354	0	0	0.957935	-0.062	0.327684	0.690493	down	no
2135	MSTRG.1218.1	1	917	MSTRG.1218	CH242-58J12.2	0	0	0	0	0	0	9.76227	1.45682	0	0	5.80126	0.762604	0.659612	-0.600311	0.123896	0.462608	down	no
2137	MSTRG.1220.1	1	898	MSTRG.1220	CH242-58J12.2	1.16926	0.236195	0	0	0	0	11.9187	1.77862	0	0	7.98998	1.05032	0.649937	-0.621628	0.195057	0.569938	down	no
2138	MSTRG.1221.1	1	225	MSTRG.1221	CH242-58J12.2	0	0	0	0	0	0	12.08	1.80269	0	0	0	0	0.798696	-0.324282	0.122334	0.459939	down	no
2139	MSTRG.1222.1	1	317	MSTRG.1222	CH242-58J12.2	0	0	0	0	8.57413	1.40936	0	0	0	0	0	0	1.37237	0.456673	0.414641	0.718646	up	no
2141	MSTRG.1224.1	1	1557	MSTRG.1224	CH242-58J12.2	0	0	0	0	0	0	14.9332	2.22848	0	0	0	0	0.774435	-0.368784	0.122334	0.459939	down	no
2142	MSTRG.1225.1	1	1216	MSTRG.1225	CH242-58J12.2	0	0	0	0	0	0	11.3002	1.68632	0	0	0	0	0.806118	-0.310938	0.122334	0.459939	down	no
2143	MSTRG.1226.1	1	401	MSTRG.1226	CH242-58J12.2	7.00249	1.41453	0	0	0	0	0	0	0	0	0	0	1.34209	0.424485	0.456053	0.719252	up	no
2146	MSTRG.1229.1	1	7168	MSTRG.1229	CH242-58J12.2	3.14076	0.634444	0	0	5.53292	0.909466	0	0	1.12082	0.124587	0	0	1.41992	0.505815	0.225963	0.604385	up	no
2150	MSTRG.1232.1	1	368	MSTRG.1232	CH242-58J12.2	0	0	0	0	12.7038	2.08817	0	0	0	0	0	0	1.50064	0.585578	0.414641	0.718646	up	no
2151	MSTRG.1233.1	1	1808	MSTRG.1233	CH242-58J12.2	7.38496	1.49178	6.88108	0.854228	6.76327	1.1117	0	0	0	0	8.94469	1.17582	1.5858	0.665212	0.214067	0.590187	up	no
2152	MSTRG.1234.1	1	666	MSTRG.1234	CH242-58J12.2	5.63063	1.1374	0	0	0	0	12.47	1.86089	0	0	0	0	1.02458	0.0350308	0.943303	0.975456	up	no
2153	MSTRG.1235.1	1	589	MSTRG.1235	CH242-58J12.2	3.04075	0.61424	0	0	0	0	10.7623	1.60606	0	0	0	0	0.952112	-0.0707968	0.830305	0.924816	down	no
2154	MSTRG.1236.1	1	1384	MSTRG.1236	CH242-58J12.2	0	0	2.08643	0.259013	1.8526	0.304518	12.8663	1.92004	0	0	2.821	0.370834	0.826999	-0.274043	0.322274	0.690493	down	no
2155	MSTRG.1237.1	1	266	MSTRG.1237	CH242-58J12.2	0	0	0	0	0	0	9.08271	1.35541	0	0	0	0	0.829565	-0.269573	0.122334	0.459939	down	no
2157	MSTRG.1239.1	1	1098	MSTRG.1239	CH242-58J12.2	0	0	7.19035	0.89262	3.57559	0.587732	9.74681	1.45451	0	0	8.4918	1.11629	0.882402	-0.180492	0.742753	0.878383	down	no
2160	MSTRG.1242.1	1	634	MSTRG.1242	CH242-58J12.2	0	0	0	0	0	0	0	0	0	0	10.1735	1.33736	0.719189	-0.475556	0.344931	0.690493	down	no
2162	MSTRG.1244.1	1	669	MSTRG.1244	CH242-58J12.2	4.89985	0.989785	10.0897	1.25255	0	0	0	0	0	0	17.2407	2.26637	1.01896	0.0270996	0.970663	0.987474	up	no
2163	MSTRG.1245.1	1	6980	MSTRG.1245	CH242-58J12.2	2.07393	0.418939	8.94715	1.11071	0	0	12.996	1.93939	10.319	1.14702	2.52994	0.332573	0.739456	-0.435464	0.443648	0.719252	down	no
2164	MSTRG.1246.1	1	1999	MSTRG.1246	CH242-58J12.2	3.74887	0.757284	11.1526	1.3845	0	0	13.0525	1.94782	13.4357	1.49347	0	0	0.86836	-0.203634	0.783862	0.902053	down	no
2167	MSTRG.1249.1	1	968	MSTRG.1249	CH242-58J12.2	2.83347	0.57237	0	0	0	0	0	0	0	0	6.05682	0.796198	0.926519	-0.110108	0.795682	0.90754	down	no
2168	MSTRG.1250.1	1	9894	MSTRG.1250	CH242-58J12.2	4.26491	0.861524	0	0	0	0	11.6063	1.73201	4.08708	0.454307	0	0	0.852805	-0.229713	0.620144	0.809029	down	no
2170	MSTRG.1252.1	1	362	MSTRG.1252	CH242-58J12.2	0	0	0	0	0	0	10.8267	1.61566	0	0	0	0	0.810818	-0.30255	0.122334	0.459939	down	no
2171	MSTRG.1253.1	1	968	MSTRG.1253	CH242-58J12.2	2.83347	0.57237	0	0	0	0	0	0	0	0	6.05682	0.796198	0.926519	-0.110108	0.795682	0.90754	down	no
2172	MSTRG.1254.1	1	10519	MSTRG.1254	CH242-58J12.2	4.5376	0.916609	9.50423	1.17987	0	0	12.2505	1.82813	3.84424	0.427313	0	0	1.09307	0.128387	0.829459	0.924467	up	no
2175	MSTRG.1162.1	1	281	MSTRG.1162	ZNF280D	0	0	0	0	8.59787	1.41326	0	0	0	0	0	0	1.37317	0.457513	0.414641	0.718646	up	no
2183	MSTRG.1166.1	1	446	MSTRG.1166	TEX9	0	0	8.40807	1.04379	3.98879	0.655651	0	0	0	0	12.4439	1.63582	1.02441	0.0347907	0.956779	0.981045	up	no
2184	MSTRG.1167.1	1	635	MSTRG.1167	TEX9	0	0	0	0	10.7008	1.75893	0	0	0	0	0	0	1.44096	0.527031	0.414641	0.718646	up	no
2186	MSTRG.1169.1	1	354	MSTRG.1169	TEX9	12.2881	2.48224	24.4661	3.03726	6.82486	1.12183	0	0	19.2825	2.14338	0	0	1.94215	0.957656	0.208536	0.584795	up	no
2188	MSTRG.1171.1	1	1944	MSTRG.1171	TEX9	0	0	12.4712	1.54819	6.91255	1.13624	11.758	1.75464	12.7891	1.42159	10.0859	1.32584	0.713784	-0.48644	0.394029	0.718646	down	no
2190	MSTRG.1172.1	1	1704	MSTRG.1172	.	0	0	0	0	0	0	9.10739	1.35909	0	0	0	0	0.829282	-0.270065	0.122334	0.459939	down	no
2192	MSTRG.1180.1	1	744	MSTRG.1180	.	0.403226	0.081453	0	0	5.11955	0.841517	10.1075	1.50834	4.43548	0.493034	0	0	0.893667	-0.162191	0.632494	0.815625	down	no
2193	MSTRG.1181.1	1	1723	MSTRG.1181	.	2.67447	0.540251	0	0	0	0	0	0	0	0	1.2188	0.160218	1.09033	0.124763	0.6581	0.83108	up	no
2194	MSTRG.1182.1	2	727	MSTRG.1182	.	2.22425	0.449305	4.22971	0.525083	2.49243	0.40969	10.2847	1.53479	3.54042	0.393542	1.62347	0.213413	0.968624	-0.0459913	0.786722	0.903419	down	no
2198	MSTRG.1184.1	1	11183	MSTRG.1184	ENSSSCG00000024210	0	0	0	0	8.30877	1.36574	14.1048	2.10485	12.9045	1.43442	11.6052	1.52556	0.523578	-0.933523	0.127374	0.47011	down	no
2199	MSTRG.1185.1	1	8056	MSTRG.1185	ENSSSCG00000024210	0	0	12.2289	1.51811	7.81691	1.28489	11.1888	1.6697	11.9852	1.33224	8.57063	1.12665	0.770895	-0.375394	0.508397	0.738147	down	no
2200	MSTRG.1186.1	1	1703	MSTRG.1186	ENSSSCG00000024210	8.05344	1.62682	13.8456	1.71881	0	0	0	0	10.8884	1.21032	0	0	1.37225	0.456542	0.514687	0.741804	up	no
2202	MSTRG.1175.1	1	1516	MSTRG.1175	.	9.77704	1.97499	10.9743	1.36236	0	0	10.1596	1.51612	0	0	8.10026	1.06482	1.15538	0.208367	0.787014	0.90356	up	no
2204	MSTRG.1177.1	1	278	MSTRG.1177	.	0	0	13.4892	1.67457	0.543165	0.089282	0	0	0	0	7.54317	0.991586	1.06672	0.0931868	0.884549	0.94954	up	no
2208	MSTRG.1187.1	1	233	MSTRG.1187	.	13.0858	2.64338	37.897	4.70459	27.0086	4.43949	10.8069	1.61271	18.5064	2.05712	22.4034	2.94504	1.48035	0.565938	0.128991	0.473478	up	no
2212	MSTRG.1191.1	1	224	MSTRG.1191	ENSSSCG00000029459	4.58036	0.925246	3.34821	0.415652	0	0	4.71875	0.704177	0	0	10.683	1.40434	0.87654	-0.190108	0.746878	0.88082	down	no
2214	MSTRG.1193.1	1	697	MSTRG.1193	ENSSSCG00000029459	0	0	0	0	0	0	10.2956	1.5364	0	0	2.7977	0.367772	0.722821	-0.468289	0.0820261	0.459939	down	no
2215	MSTRG.1194.1	1	617	MSTRG.1194	ENSSSCG00000029459	1.9449	0.392875	0	0	0	0	9.04538	1.34984	0	0	0	0	0.927065	-0.109258	0.659005	0.831594	down	no
2216	MSTRG.1195.1	1	723	MSTRG.1195	ENSSSCG00000029459	0	0	0	0	0	0	8.5574	1.27702	6.18811	0.68785	0	0	0.680091	-0.556199	0.137454	0.488306	down	no
2217	MSTRG.1196.1	1	277	MSTRG.1196	ENSSSCG00000029459	0	0	0	0	0	0	10.3574	1.54563	0	0	0	0	0.815631	-0.294011	0.122334	0.459939	down	no
2219	MSTRG.1189.1	1	556	MSTRG.1189	.	3.14748	0.635801	6.38489	0.79263	8.39209	1.37944	4.34532	0.648451	0	0	2.63309	0.346133	1.53825	0.621287	0.0588951	0.459939	up	no
2226	MSTRG.1257.1	1	428	MSTRG.1257	.	6.99533	1.41308	0	0	4.92523	0.809577	16.1238	2.40615	0	0	9.45561	1.24299	0.929219	-0.10591	0.853593	0.935692	down	no
2270	MSTRG.1269.1	1	1616	MSTRG.1269	.	0	0	0	0	9.01547	1.4819	3.17698	0.4741	0	0	0	0	1.27454	0.349976	0.495653	0.730123	up	no
2271	MSTRG.1270.1	1	1301	MSTRG.1270	.	0	0	0	0	0	0	17.9055	2.67202	0	0	0	0	0.752993	-0.409291	0.122334	0.459939	down	no
2274	MSTRG.1273.1	1	582	MSTRG.1273	.	2.31959	0.468564	9.78007	1.21411	3.58076	0.588581	16.5498	2.46972	0	0	3.60825	0.474322	1.12327	0.167701	0.691339	0.850122	up	no
2275	MSTRG.1274.1	1	734	MSTRG.1274	.	0	0	0	0	0	0	9.64033	1.43862	0	0	0	0	0.823307	-0.280498	0.122334	0.459939	down	no
2276	MSTRG.1275.1	1	362	MSTRG.1275	.	0	0	0	0	0	0	10.4171	1.55454	0	0	4.40608	0.5792	0.682527	-0.551041	0.102698	0.459939	down	no
2277	MSTRG.1276.1	1	811	MSTRG.1276	.	1.2947	0.261533	0	0	0	0	9.1233	1.36147	0	0	0	0	0.895953	-0.158505	0.445519	0.719252	down	no
2278	MSTRG.1277.1	1	361	MSTRG.1277	.	0	0	0	0	0.836565	0.137509	11.2936	1.68534	0	0	0	0	0.844452	-0.243913	0.0798671	0.459939	down	no
2291	MSTRG.1283.1	1	779	MSTRG.1283	.	0	0	0	0	0	0	13.5584	2.02332	0	0	0	0	0.785605	-0.348125	0.122334	0.459939	down	no
2297	MSTRG.1288.1	1	833	MSTRG.1288	LEO1	0	0	0	0	9.2413	1.51902	0	0	0	0	0	0	1.39454	0.479789	0.414641	0.718646	up	no
2305	MSTRG.1289.1	1	437	MSTRG.1289	.	0	0	0.686499	0.085223	7.33638	1.20591	10.6568	1.5903	0	0	4.46224	0.586584	0.925923	-0.111036	0.798891	0.90877	down	no
2306	MSTRG.1292.1	1	431	MSTRG.1292	.	0	0	0	0	8.39907	1.38058	0	0	0	0	0	0	1.36645	0.450434	0.414641	0.718646	up	no
2312	MSTRG.1297.1	1	1198	MSTRG.1297	.	0.876461	0.177048	0	0	1.51252	0.248618	10.7679	1.6069	0	0	0	0	0.928074	-0.107688	0.106723	0.459939	down	no
2324	MSTRG.1301.1	1	281	MSTRG.1301	.	0	0	0	0	0	0	12.8327	1.91502	0	0	0	0	0.791879	-0.336647	0.122334	0.459939	down	no
2325	MSTRG.1302.1	1	507	MSTRG.1302	.	2.36686	0.478114	0	0	0	0	14.5759	2.17516	0	0	0	0	0.885539	-0.175372	0.571136	0.777619	down	no
2337	MSTRG.1309.1	1	230	MSTRG.1309	.	6.52174	1.31741	0	0	1.31304	0.215829	0	0	0	0	0	0	1.42031	0.506206	0.322988	0.690493	up	no
2365	MSTRG.1327.1	1	455	MSTRG.1327	COPS2	0	0	6.8044	0.844708	0	0	10.6	1.58183	0	0	0	0	0.980836	-0.0279164	0.95564	0.980586	down	no
2367	MSTRG.1329.1	1	368	MSTRG.1329	COPS2	0	0	3.15217	0.391316	0	0	12.3098	1.83698	0	0	0	0	0.88136	-0.182196	0.612442	0.804278	down	no
2372	MSTRG.1323.1	1	976	MSTRG.1323	.	4.91803	0.993458	0	0	7.22009	1.18679	5.10553	0.761897	0	0	0	0	1.4746	0.560322	0.189452	0.564871	up	no
2374	MSTRG.1325.1	1	566	MSTRG.1325	.	0	0	0	0	0	0	11.2314	1.67606	0	0	0	0	0.80679	-0.309734	0.122334	0.459939	down	no
2380	MSTRG.1332.1	1	209	MSTRG.1332	SHC4	6.45933	1.3048	0	0	20.0287	3.29219	0	0	0	0	0	0	2.23247	1.15864	0.19163	0.567563	up	no
2385	MSTRG.1335.1	1	302	MSTRG.1335	CEP152	0	0	7.9106	0.982033	10.851	1.78361	19.8742	2.96582	0	0	0	0	1.31988	0.40041	0.471183	0.719908	up	no
2388	MSTRG.1337.1	1	391	MSTRG.1337	FBN1	7.67263	1.5499	0	0	0	0	0	0	0	0	1.53453	0.201721	1.27264	0.347828	0.562758	0.772645	up	no
2389	MSTRG.1338.1	1	590	MSTRG.1338	.	2.0339	0.410854	0	0	0	0	9.72542	1.45132	2.89695	0.322016	0	0	0.826494	-0.274923	0.378265	0.718435	down	no
2394	MSTRG.1341.1	3	2983	MSTRG.1341	.	16.5424	3.34162	27.8961	3.46306	20.697	3.40203	18.6782	2.78734	20.5203	2.28097	11.8421	1.5567	1.43199	0.518023	0.0307544	0.368824	up	no
2408	MSTRG.1347.1	1	215	MSTRG.1347	SLC24A5	0	0	3.48837	0.433052	0	0	16.1535	2.41058	0.697674	0.077551	0	0	0.829609	-0.269497	0.51192	0.740201	down	no
2414	MSTRG.1343.1	1	3481	MSTRG.1343	.	0	0	0	0	7.86642	1.29303	0	0	5.97213	0.663843	0	0	1.10331	0.141832	0.812427	0.915809	up	no
2422	MSTRG.1349.1	1	1497	MSTRG.1349	ENSSSCG00000030710	3.70742	0.748909	11.2224	1.39317	0	0	1e-06	0	0	0	1.8e-05	2e-06	1.57431	0.654724	0.214853	0.591296	up	no
2423	MSTRG.1350.1	1	277	MSTRG.1350	.	0	0	0	0	8.59928	1.41349	0	0	0	0	0	0	1.37322	0.457563	0.414641	0.718646	up	no
2427	MSTRG.1353.1	1	547	MSTRG.1353	.	6.84826	1.38337	0	0	0	0	0	0	0	0	0	0	1.33629	0.418231	0.456053	0.719252	up	no
2434	MSTRG.1357.1	1	1444	MSTRG.1357	.	0	0	12.6676	1.57257	0	0	3.93698	0.587514	0	0	0	0	1.20753	0.272056	0.670394	0.837803	up	no
2436	MSTRG.1359.1	1	247	MSTRG.1359	.	0	0	0	0	0	0	0	0	0	0	12.753	1.67645	0.68234	-0.551436	0.344931	0.690493	down	no
2439	MSTRG.1363.1	1	249	MSTRG.1363	SLC28A2	0	0	0	0	4.22892	0.695121	0	0	14.4056	1.60128	3.01205	0.395948	0.729159	-0.455694	0.410116	0.718646	down	no
2440	MSTRG.1361.1	1	399	MSTRG.1361	.	0	0	10.8221	1.34347	8.70426	1.43075	0	0	0	0	9.30827	1.22362	1.31032	0.38992	0.582298	0.785161	up	no
2441	MSTRG.1364.1	1	242	MSTRG.1364	.	9.38843	1.89649	5.53719	0.687395	3.11984	0.512818	0	0	9.26446	1.02981	0.603306	0.079308	1.42748	0.513471	0.338981	0.690493	up	no
2443	MSTRG.1367.1	1	235	MSTRG.1367	SHF	14.1362	2.85555	19.9574	2.47755	11.566	1.90114	8.99574	1.34243	15.166	1.6858	7.02128	0.922981	1.47271	0.558473	0.0813127	0.459939	up	no
2468	MSTRG.1375.1	1	560	MSTRG.1375	.	3.75	0.757511	6.12321	0.760145	3.11071	0.511319	6.74107	1.00597	0	0	10.9643	1.44131	1.01175	0.0168492	0.972373	0.988177	up	no
2472	MSTRG.1381.1	1	232	MSTRG.1381	ENSSSCG00000028089	1.3753	0.277815	0	0	0	0	14.319	2.13681	2.38582	0.265199	0	0	0.770967	-0.375259	0.21685	0.593612	down	no
2473	MSTRG.1382.1	1	296	MSTRG.1382	ENSSSCG00000028089	1.88514	0.380803	3.04054	0.377457	1.02027	0.167705	0	0	3.5473	0.394306	11.1486	1.46554	0.802821	-0.316851	0.357535	0.701849	down	no
2477	MSTRG.1385.1	1	379	MSTRG.1385	ENSSSCG00000023996	1.58311	0.319794	0	0	0	0	17.5303	2.61605	0	0	0	0	0.828837	-0.27084	0.347971	0.69276	down	no
2478	MSTRG.1386.1	1	896	MSTRG.1386	ENSSSCG00000023996	2.50781	0.506586	0	0	0	0	9.58929	1.43101	0	0	0	0	0.944647	-0.0821531	0.776095	0.897322	down	no
2479	MSTRG.1387.1	1	1225	MSTRG.1387	ENSSSCG00000023996	0	0	0	0	0	0	0	0	7.8	0.867023	0	0	0.782101	-0.354573	0.327684	0.690493	down	no
2481	MSTRG.1389.1	1	1374	MSTRG.1389	ENSSSCG00000023996	0	0	0	0	0	0	9.01965	1.346	2.73134	0.303607	0	0	0.748001	-0.418887	0.0965966	0.459939	down	no
2485	MSTRG.1378.1	1	254	MSTRG.1378	.	0	0	1.1811	0.146624	8.32283	1.36805	0	0	0	0	0	0	1.42222	0.508144	0.334956	0.690493	up	no
2489	MSTRG.1399.1	1	2050	MSTRG.1399	FRMD5	0	0	0	0	0	0	10.1629	1.51661	0	0	0	0	0.817674	-0.290403	0.122334	0.459939	down	no
2538	MSTRG.1408.1	1	375	MSTRG.1408	.	0	0	0	0	0	0	12.4827	1.86278	0	0	0	0	0.795009	-0.330957	0.122334	0.459939	down	no
2543	MSTRG.1418.1	1	1059	MSTRG.1418	.	0	0	0	0	8.52597	1.40144	0	0	0	0	0	0	1.37075	0.454964	0.414641	0.718646	up	no
2552	MSTRG.1422.1	1	6484	MSTRG.1422	.	10.0544	2.03103	18.7292	2.32507	2.31169	0.379981	26.7133	3.98642	21.0603	2.34099	12.3251	1.6202	0.708054	-0.498068	0.426582	0.719252	down	no
2563	MSTRG.1426.1	1	252	MSTRG.1426	LRRC57	0	0	2.36905	0.294097	0	0	11.9841	1.78839	0	0	0	0	0.865278	-0.208764	0.513325	0.741073	down	no
2564	MSTRG.1427.1	1	1007	MSTRG.1427	LRRC57	0	0	0	0	0	0	12.4528	1.85833	0	0	0	0	0.795279	-0.330467	0.122334	0.459939	down	no
2587	MSTRG.1434.1	1	384	MSTRG.1434	.	45.5625	9.20376	56.125	6.96744	69.8568	11.4826	46.0677	6.87467	40.1615	4.46422	38.2526	5.02849	1.65446	0.726363	0.0239442	0.332616	up	no
2592	MSTRG.1437.1	1	403	MSTRG.1437	.	7.07196	1.42856	0	0	0	0	0	0	0	0	0	0	1.34469	0.427276	0.456053	0.719252	up	no
2593	MSTRG.1438.1	1	349	MSTRG.1438	.	0.859599	0.173642	0	0	0	0	9.40401	1.40336	0	0	0	0	0.871267	-0.198813	0.293763	0.675378	down	no
2634	MSTRG.1453.1	3	1153	MSTRG.1453	ENSSSCG00000004750	9.73999	1.96751	15.0489	1.86819	13.9186	2.28785	21.411	3.19516	15.8909	1.76638	15.5838	2.04856	0.968634	-0.0459766	0.404709	0.718646	down	no
2635	MSTRG.1454.1	1	2995	MSTRG.1454	.	43.7324	8.83408	64.1531	7.96406	54.2285	8.91373	75.6845	11.2944	0	0	0	0	5.54631	2.47153	0.00463339	0.191777	up	yes
2636	MSTRG.1453.2	3	5477	MSTRG.1453	.	55.4002	11.191	77.7987	9.65804	68.678	11.2888	86.3261	12.8824	85.8342	9.54105	73.0119	9.59778	1.04603	0.0649296	0.239573	0.618472	up	no
2642	MSTRG.1457.1	1	4184	MSTRG.1457	.	0	0	14.2818	1.77296	11.8408	1.94632	35.8112	5.34409	24.7113	2.74682	19.3265	2.54056	0.490432	-1.02787	0.183617	0.559459	down	no
2643	MSTRG.1458.1	1	3405	MSTRG.1458	.	0	0	0	0	6.69031	1.09971	9.55301	1.42559	0	0	0	0	1.07655	0.106422	0.75059	0.882851	up	no
2644	MSTRG.1459.1	1	218	MSTRG.1459	.	0	0	0	0	0	0	0	0	0	0	17.1009	2.248	0.632945	-0.659847	0.344931	0.690493	down	no
2649	MSTRG.1463.1	1	11368	MSTRG.1463	ENSSSCG00000004752	44.7353	9.03667	63.1024	7.83363	53.3	8.76111	71.7497	10.7072	60.3695	6.71048	48.4116	6.36395	1.15178	0.203867	0.0336488	0.383374	up	no
2654	MSTRG.1467.1	2	903	MSTRG.1467	INO80	4.40729	0.890286	5.28345	0.655896	4.30633	0.707846	2.82772	0.421979	5.20168	0.578202	10.4385	1.3722	0.968386	-0.0463457	0.848078	0.933147	down	no
2679	MSTRG.1483.1	1	1952	MSTRG.1483	PPP1R14D	0	0	0	0	0	0	7.98719	1.19193	13.0712	1.45295	0	0	0.591922	-0.756522	0.188216	0.56403	down	no
2683	MSTRG.1472.1	1	404	MSTRG.1472	.	1.48515	0.300005	6.49263	0.806004	0	0	13.4158	2.00204	13.3684	1.48599	0	0	0.719182	-0.475572	0.476804	0.719908	down	no
2684	MSTRG.1473.1	1	2170	MSTRG.1473	.	0	0	0	0	0	0	10.6286	1.5861	0	0	0	0	0.81283	-0.298974	0.122334	0.459939	down	no
2685	MSTRG.1470.1	1	230	MSTRG.1470	.	2.6087	0.526965	14.3087	1.7763	0	0	0	0	16.8565	1.87372	11.7	1.53802	0.72387	-0.466197	0.266143	0.647309	down	no
2687	MSTRG.1475.1	1	676	MSTRG.1475	.	3.99408	0.806817	0	0	7.59467	1.24836	11.9379	1.78148	16.1598	1.79627	0	0	0.870404	-0.200243	0.762936	0.889909	down	no
2688	MSTRG.1476.1	1	237	MSTRG.1476	.	0.632911	0.12785	0	0	0	0	0	0	0	0	11.3797	1.49592	0.729821	-0.454385	0.399011	0.718646	down	no
2703	MSTRG.1490.1	1	393	MSTRG.1490	.	16.7863	3.39087	28.4427	3.53093	13.6361	2.24142	10.6438	1.58837	19.9101	2.21314	18.7354	2.46286	1.25953	0.332886	0.11205	0.459939	up	no
2706	MSTRG.1493.1	1	1070	MSTRG.1493	.	0	0	6.56075	0.814461	9.90935	1.62883	5.42902	0.81017	0	0	0	0	1.49325	0.578456	0.289596	0.671706	up	no
2707	MSTRG.1494.1	1	2630	MSTRG.1494	.	4.91673	0.993194	0	0	9.40799	1.54642	7.19639	1.07391	17.7213	1.96984	11.5951	1.52423	0.683593	-0.548791	0.35581	0.700021	down	no
2725	MSTRG.1503.1	1	836	MSTRG.1503	ENSSSCG00000004784	0	0	0	0	0	0	0	0	0	0	31.7883	4.17872	0.528086	-0.921156	0.344931	0.690493	down	no
2737	MSTRG.1511.1	1	588	MSTRG.1511	.	1.27551	0.257657	2.80612	0.348356	0	0	7.19048	1.07303	13.682	1.52084	6.88776	0.905429	0.545956	-0.873144	0.0206739	0.314886	down	no
2742	MSTRG.1516.1	1	366	MSTRG.1516	.	3.18033	0.642436	0	0	0	0	13.2022	1.97016	0	0	0	0	0.930702	-0.103608	0.767819	0.892621	down	no
2744	MSTRG.1517.1	1	230	MSTRG.1517	.	7.14783	1.44388	14.1957	1.76227	0	0	4.57826	0.683212	0	0	0	0	1.64191	0.715377	0.31652	0.690493	up	no
2747	MSTRG.1519.1	1	328	MSTRG.1519	.	0.914634	0.184759	3.65854	0.454176	0	0	9.20732	1.374	0	0	0	0	0.982841	-0.0249701	0.939677	0.973754	down	no
2755	MSTRG.1526.1	1	231	MSTRG.1526	THBS1	0	0	0	0	0	0	0	0	0	0	11.6883	1.53649	0.696719	-0.521351	0.344931	0.690493	down	no
2756	MSTRG.1527.1	1	414	MSTRG.1527	.	0	0	0	0	0	0	9.11836	1.36073	0	0	0	0	0.829157	-0.270283	0.122334	0.459939	down	no
2760	MSTRG.1528.1	1	471	MSTRG.1528	.	0	0	0	0	0	0	12.9565	1.93349	0	0	0	0	0.79079	-0.338634	0.122334	0.459939	down	no
2761	MSTRG.1529.1	1	557	MSTRG.1529	.	5.52065	1.11519	15.2154	1.88887	0	0	9.20108	1.37307	0	0	10.368	1.36293	1.05401	0.0758876	0.92189	0.966256	up	no
2762	MSTRG.1530.1	1	1850	MSTRG.1530	.	2.08919	0.422023	9.44757	1.17284	0	0	5.61351	0.837702	4.74928	0.527914	0	0	1.05716	0.0801979	0.876375	0.945977	up	no
2763	MSTRG.1531.1	1	6931	MSTRG.1531	.	4.54227	0.917553	14.9116	1.85115	5.99178	0.984889	11.3573	1.69485	7.75011	0.861477	7.32694	0.963162	1.06422	0.0897961	0.746763	0.880742	up	no
2764	MSTRG.1532.1	1	697	MSTRG.1532	.	0	0	10.764	1.33626	0	0	0	0	0	0	0	0	1.29676	0.37491	0.480118	0.719908	up	no
2767	MSTRG.1535.1	1	251	MSTRG.1535	RASGRP1	8.76494	1.77055	0	0	0	0	0	0	0	0	0	0	1.40514	0.490718	0.456053	0.719252	up	no
2768	MSTRG.1536.1	1	691	MSTRG.1536	RASGRP1	2.16498	0.437332	0	0	1.74819	0.287356	10.0434	1.49877	0	0	0	0	1.01235	0.017711	0.902495	0.957848	up	no
2772	MSTRG.1539.1	1	366	MSTRG.1539	.	0	0	0	0	0	0	0	0	0	0	13.1011	1.7222	0.677865	-0.560931	0.344931	0.690493	down	no
2777	MSTRG.1540.1	1	604	MSTRG.1540	.	12.4172	2.50832	19.1225	2.3739	9.93378	1.63285	3.75	0.559611	14.5033	1.61214	14.957	1.96616	1.27482	0.350292	0.0635181	0.459939	up	no
2784	MSTRG.1542.1	1	3770	MSTRG.1542	.	3.89708	0.787222	7.20133	0.893983	0	0	0	0	0	0	8.85252	1.16371	1.0939	0.129485	0.804594	0.91176	up	no
2785	MSTRG.1543.1	1	3737	MSTRG.1543	.	5.08938	1.02807	8.43645	1.04731	0	0	9.7019	1.44781	9.40594	1.04553	0	0	0.978715	-0.0310392	0.960781	0.982664	down	no
2786	MSTRG.1544.1	1	360	MSTRG.1544	.	0	0	0	0	0	0	11.4	1.70122	0	0	0	0	0.805146	-0.312678	0.122334	0.459939	down	no
2787	MSTRG.1545.1	1	332	MSTRG.1545	.	9.4488	1.90868	4.18675	0.519749	0	0	0	0	0	0	0	0	1.62346	0.699072	0.273776	0.655234	up	no
2788	MSTRG.1546.1	1	446	MSTRG.1546	.	0	0	0	0	0	0	10.7556	1.60505	0	0	0	0	0.811537	-0.301272	0.122334	0.459939	down	no
2789	MSTRG.1547.1	1	341	MSTRG.1547	.	0	0	0	0	0	0	17.1994	2.56666	10.8386	1.20478	0	0	0.555116	-0.849138	0.13566	0.485144	down	no
2790	MSTRG.1548.1	1	231	MSTRG.1548	.	0	0	0	0	1.30736	0.214895	9.15151	1.36568	1.2987	0.144359	0	0	0.842979	-0.246431	0.0891229	0.459939	down	no
2791	MSTRG.1549.1	1	359	MSTRG.1549	.	0	0	0	0	0	0	13.039	1.94581	0	0	0.417827	0.054925	0.773835	-0.369902	0.0969188	0.459939	down	no
2793	MSTRG.1551.1	1	313	MSTRG.1551	ENSSSCG00000022680	0	0	1.4377	0.178478	0	0	9.54633	1.4246	0	0	0	0	0.866863	-0.206125	0.404894	0.718646	down	no
2794	MSTRG.1552.1	1	415	MSTRG.1552	ENSSSCG00000022680	0	0	12.9976	1.61354	0	0	0	0	4.67803	0.519995	0	0	1.13814	0.186674	0.752071	0.883827	up	no
2799	MSTRG.1556.1	1	222	MSTRG.1556	C15orf41	7.02703	1.41948	4.05405	0.503276	5.44144	0.894428	23.1261	3.4511	14.1892	1.57722	17.5541	2.30757	0.598687	-0.740125	0.052597	0.45831	down	no
2800	MSTRG.1557.1	1	276	MSTRG.1557	C15orf41	9.13044	1.84438	0	0	0	0	0	0	0	0	0	0	1.41753	0.503382	0.456053	0.719252	up	no
2803	MSTRG.1559.1	1	213	MSTRG.1559	.	0	0	0	0	0	0	11.3427	1.69267	0	0	0	0	0.805703	-0.311681	0.122334	0.459939	down	no
2806	MSTRG.1560.1	1	229	MSTRG.1560	.	0	0	0	0	0	0	9.23144	1.3776	0	0	0	0	0.82787	-0.272524	0.122334	0.459939	down	no
2809	MSTRG.1563.1	1	228	MSTRG.1563	.	3.63158	0.73359	4.60526	0.571704	12.4956	2.05395	20.5307	3.06379	24.8158	2.75844	12.5	1.64319	0.618554	-0.693028	0.145368	0.502685	down	no
2820	MSTRG.1568.1	1	1062	MSTRG.1568	.	0	0	0	0	6.11394	1.00497	0	0	0	0	6.77966	0.89122	1.00301	0.00433368	0.993949	0.997546	up	no
2821	MSTRG.1570.1	1	4801	MSTRG.1570	.	5.37055	1.08487	6.82983	0.847865	7.20496	1.1843	4.14893	0.619143	12.2629	1.3631	7.98228	1.04931	0.99235	-0.0110788	0.942686	0.97516	down	no
2823	MSTRG.1572.1	1	2370	MSTRG.1572	.	3.89873	0.787556	0	0	4.58439	0.753551	10.419	1.55482	0	0	0	0	1.21103	0.276236	0.281096	0.662633	up	no
2831	MSTRG.1576.1	1	441	MSTRG.1576	.	0	0	0	0	0	0	11.2993	1.68619	0	0	0	0	0.806126	-0.310923	0.122334	0.459939	down	no
2833	MSTRG.1578.1	1	6668	MSTRG.1578	.	0	0	5.30669	0.65878	0	0	6.46499	0.964767	0	0	0	0	1.00771	0.0110866	0.977812	0.990497	up	no
2853	MSTRG.1581.1	1	1102	MSTRG.1581	TTC23	5.02722	1.01551	14.9456	1.85536	0	0	0	0	0	0	0	0	1.74239	0.801065	0.210845	0.586908	up	no
2863	MSTRG.1586.1	1	312	MSTRG.1586	.	7.69231	1.55387	9.98077	1.23903	2.90385	0.477315	0.967949	0.144447	19.5513	2.17326	0	0	1.24145	0.31203	0.64066	0.820575	up	no
2864	MSTRG.1587.1	1	970	MSTRG.1587	.	2.62887	0.531039	0	0	0	0	11.3598	1.69522	0	0	0	0	0.928604	-0.106865	0.727645	0.870353	down	no
2865	MSTRG.1588.1	1	4530	MSTRG.1588	.	7.95121	1.60617	14.4238	1.7906	8.70331	1.43059	11.7848	1.75864	13.5302	1.50398	10.3508	1.36066	1.03831	0.054234	0.585082	0.78675	up	no
2866	MSTRG.1589.1	1	425	MSTRG.1589	.	8.82353	1.78238	15.5294	1.92785	9.23765	1.51842	23.0588	3.44106	0	0	0	0	1.96966	0.977949	0.0435619	0.423427	up	no
2867	MSTRG.1590.1	1	595	MSTRG.1590	.	5.52941	1.11696	0	0	9.10924	1.49732	10.1513	1.51487	8.14622	0.905507	6.27563	0.824962	0.896983	-0.156848	0.73487	0.874171	down	no
2868	MSTRG.1591.1	1	4012	MSTRG.1591	.	6.38634	1.29006	11.8316	1.46879	6.75424	1.11022	11.8138	1.76297	11.7672	1.308	9.60369	1.26245	0.955296	-0.0659801	0.565892	0.774481	down	no
2881	MSTRG.1594.1	1	220	MSTRG.1594	.	0	0	0	0	0	0	9.60909	1.43396	0	0	0	0	0.823651	-0.279896	0.122334	0.459939	down	no
2891	MSTRG.1601.1	2	1037	MSTRG.1601	.	9.48437	1.91587	16.1726	2.00769	20.9855	3.44946	4.70485	0.702103	9.16617	1.01888	7.50434	0.986482	1.77315	0.826311	0.043201	0.421841	up	no
2895	MSTRG.1602.1	1	1272	MSTRG.1602	.	2.8066	0.566943	0	0	7.66431	1.25981	0	0	0	0	4.69497	0.617177	1.29274	0.370429	0.498091	0.731669	up	no
2897	MSTRG.1605.1	1	885	MSTRG.1605	.	0	0	4.06441	0.504562	0	0	9.18418	1.37055	0	0	0	0	0.938804	-0.0911039	0.806178	0.912629	down	no
2898	MSTRG.1606.1	1	391	MSTRG.1606	.	3.83632	0.774948	0	0	0	0	10.8133	1.61366	11.8926	1.32194	0	0	0.704942	-0.504423	0.415132	0.718981	down	no
2900	MSTRG.1608.1	1	1177	MSTRG.1608	.	0	0	6.83772	0.848845	0	0	0	0	0	0	0	0	1.20709	0.271528	0.480118	0.719908	up	no
2901	MSTRG.1598.1	1	204	MSTRG.1598	.	7.35294	1.48532	0	0	0	0	0	0	0	0	0	0	1.3551	0.438401	0.456053	0.719252	up	no
2905	MSTRG.1611.1	1	538	MSTRG.1611	.	1.10409	0.223029	1.39405	0.17306	8.95725	1.47233	0.561338	0.083768	0	0	4.41078	0.579819	1.27995	0.356082	0.506562	0.736814	up	no
2906	MSTRG.1612.1	1	288	MSTRG.1612	.	0	0	0	0	19.1146	3.14193	0	0	15.5937	1.73335	10.4062	1.36795	0.803378	-0.315849	0.749603	0.882458	down	no
2907	MSTRG.1613.1	1	2053	MSTRG.1613	.	0	0	0	0	6.98551	1.14823	8.53044	1.273	0	0	6.50268	0.854809	0.866156	-0.207302	0.6844	0.846333	down	no
2908	MSTRG.1614.1	1	3751	MSTRG.1614	.	0	0	6.19119	0.768583	9.23167	1.51744	5.80645	0.866495	0	0	4.62917	0.608527	1.20479	0.268776	0.622266	0.810254	up	no
2910	MSTRG.1616.1	1	502	MSTRG.1616	.	6.82072	1.37781	0.59761	0.074188	2.68127	0.44073	2.40637	0.359102	0	0	3.58566	0.471352	1.2531	0.325502	0.501745	0.733618	up	no
2913	MSTRG.1619.1	1	227	MSTRG.1619	.	6.60793	1.33482	0	0	0	0	0	0	0	0	0	0	1.32714	0.408321	0.456053	0.719252	up	no
2914	MSTRG.1620.1	1	328	MSTRG.1620	.	5.03049	1.01617	0	0	0	0	0	0	0	0	0	0	1.26371	0.337662	0.456053	0.719252	up	no
2922	MSTRG.1625.1	1	372	MSTRG.1625	.	16.7204	3.37758	0	0	0	0	19.8898	2.96814	0	0	0	0	1.21193	0.277308	0.766868	0.892124	up	no
2926	MSTRG.1622.1	1	246	MSTRG.1622	.	0	0	0	0	0	0	13.4919	2.01339	0	0	0	0	0.786169	-0.34709	0.122334	0.459939	down	no
2931	MSTRG.1629.1	1	673	MSTRG.1629	ENSSSCG00000004823	7.35513	1.48576	0	0	0	0	4.79346	0.715326	0	0	0	0	1.20472	0.268695	0.640224	0.82048	up	no
2932	MSTRG.1630.1	2	588	MSTRG.1630	ENSSSCG00000004823	7.34184	1.48307	11.9201	1.47978	8.45323	1.38949	12.8342	1.91524	23.4668	2.6085	18.7942	2.47059	0.721537	-0.470855	0.000245153	0.0835943	down	no
2946	MSTRG.1637.1	1	246	MSTRG.1637	GABRA5	8.97697	1.81337	18.9929	2.3578	17.3215	2.84719	9.97053	1.4879	17.8137	1.98011	15.6888	2.06236	1.14804	0.199175	0.318285	0.690493	up	no
2974	MSTRG.1641.1	1	1877	MSTRG.1641	.	0	0	0	0	11.536	1.8962	0	0	0	0	5.96431	0.784037	1.17122	0.228006	0.76042	0.888479	up	no
2975	MSTRG.1645.1	1	977	MSTRG.1645	.	9.63869	1.94704	7.14944	0.887542	12.349	2.02985	2.51063	0.37466	8.28762	0.921224	0	0	1.87367	0.905863	0.113289	0.459939	up	no
2976	MSTRG.1646.1	1	629	MSTRG.1646	.	0	0	0	0	0	0	9.12242	1.36133	0	0	0	0	0.82911	-0.270364	0.122334	0.459939	down	no
2979	MSTRG.1649.1	1	261	MSTRG.1649	.	0	0	1.01149	0.125568	9.50958	1.56312	1.15709	0.172672	12.0345	1.33771	4.5977	0.60439	0.837344	-0.256108	0.687821	0.848336	down	no
2981	MSTRG.1650.1	1	204	MSTRG.1650	.	2.19118	0.442624	12.5	1.55177	5.84314	0.960456	6.66176	0.994133	0	0	0	0	1.65036	0.72278	0.120467	0.459939	up	no
2984	MSTRG.1651.1	1	249	MSTRG.1651	.	10.4659	2.11414	19.9839	2.48084	9.70281	1.59488	7.88353	1.17646	13.2289	1.47048	12.0482	1.58379	1.23392	0.303246	0.0873852	0.459939	up	no
2986	MSTRG.1653.1	1	275	MSTRG.1653	KLF13	0	0	0	0	8.78546	1.44409	2.19636	0.327763	0	0	1.09091	0.143405	1.23101	0.29984	0.567703	0.775624	up	no
2987	MSTRG.1654.1	1	297	MSTRG.1654	KLF13	0	0	0	0	0	0	12.202	1.8209	0	0	0	0	0.797568	-0.32632	0.122334	0.459939	down	no
3002	MSTRG.1655.1	1	242	MSTRG.1655	.	6.50826	1.31469	0	0	1.24793	0.205127	0.207989	0.031038	0.619835	0.068899	0	0	1.36945	0.453591	0.370092	0.711816	up	no
3003	MSTRG.1656.1	1	241	MSTRG.1656	.	10.5809	2.13738	11.1909	1.38925	8.74689	1.43776	10.6515	1.58951	12.4481	1.38369	6.50622	0.855275	1.19689	0.259291	0.275312	0.656751	up	no
3008	MSTRG.1666.1	1	355	MSTRG.1666	ENSSSCG00000004850	23.4662	4.74024	51.9352	6.44731	0	0	7.15241	1.06735	40.4366	4.4948	0	0	1.44642	0.532484	0.711809	0.861341	up	no
3019	MSTRG.1668.1	1	719	MSTRG.1668	.	3.04311	0.614718	4.68863	0.582053	6.51043	1.07014	14.6912	2.19237	6.87235	0.763908	3.54242	0.465668	0.939254	-0.0904123	0.517082	0.74344	down	no
3021	MSTRG.1670.1	1	238	MSTRG.1670	.	7.56302	1.52775	4.41176	0.547683	0	0	0	0	0	0	3.78151	0.497098	1.33191	0.413499	0.45386	0.719252	up	no
3030	MSTRG.1671.1	1	1216	MSTRG.1671	.	2.52796	0.510656	0	0	6.82977	1.12263	0	0	0	0	0	0	1.50476	0.589532	0.195971	0.571127	up	no
3031	MSTRG.1672.1	1	266	MSTRG.1672	.	2.81955	0.569557	0	0	0	0	8.46241	1.26284	0	0	0	0	0.972736	-0.0398793	0.895699	0.954493	down	no
3033	MSTRG.1673.1	1	301	MSTRG.1673	.	0	0	0	0	0	0	11.0365	1.64698	0	0	0	0	0.808716	-0.306295	0.122334	0.459939	down	no
3035	MSTRG.1678.1	1	1566	MSTRG.1678	.	6.54406	1.32192	12.1648	1.51015	11.2273	1.84547	4.81609	0.718704	11.8008	1.31174	9.42656	1.23917	1.19542	0.257517	0.137969	0.488992	up	no
3037	MSTRG.1680.1	1	3628	MSTRG.1680	.	11.3443	2.29158	21.1949	2.63116	17.7329	2.91482	0	0	15.5179	1.72492	11.3558	1.49278	1.7068	0.771298	0.0282592	0.355972	up	no
3043	MSTRG.1681.1	1	2324	MSTRG.1681	.	8.45095	1.70712	0	0	11.5224	1.89397	4.15318	0.619778	4.19664	0.466485	0	0	1.58252	0.662222	0.323955	0.690493	up	no
3046	MSTRG.1685.1	1	358	MSTRG.1685	.	0	0	0	0	0	0	9.27095	1.3835	0	0	0	0	0.827423	-0.273304	0.122334	0.459939	down	no
3047	MSTRG.1686.1	1	1018	MSTRG.1686	.	0	0	0	0	10.0393	1.65019	6.48216	0.967331	0	0	5.26566	0.692196	0.999021	-0.00141297	0.998094	0.999247	down	no
3048	MSTRG.1687.1	1	674	MSTRG.1687	.	0	0	0	0	8.81306	1.44863	0	0	0	0	0	0	1.38038	0.46507	0.414641	0.718646	up	no
3053	MSTRG.1688.1	1	2247	MSTRG.1688	.	28.6604	5.78949	41.316	5.12903	0	0	6.29016	0.938679	8.76947	0.974786	5.06364	0.66564	1.7936	0.842858	0.476566	0.719908	up	no
3054	MSTRG.1689.1	1	364	MSTRG.1689	.	6.59341	1.33189	0	0	0	0	0	0	0	0	0	0	1.32658	0.407716	0.456053	0.719252	up	no
3061	MSTRG.1695.1	1	216	MSTRG.1695	.	0	0	0	0	0	0	11.1852	1.66916	0	0	0	0	0.807245	-0.308921	0.122334	0.459939	down	no
3062	MSTRG.1696.1	1	305	MSTRG.1696	.	0	0	11.7902	1.46365	4.45574	0.732405	0	0	0	0	0	0	1.6063	0.683742	0.219286	0.596303	up	no
3063	MSTRG.1697.1	1	269	MSTRG.1697	.	7.80669	1.57698	0	0	0	0	0	0	0	0	0	0	1.37158	0.455841	0.456053	0.719252	up	no
3065	MSTRG.1698.1	1	233	MSTRG.1698	.	1.28755	0.26009	0	0	0	0	9.07296	1.35396	0	0	0	0	0.896234	-0.158053	0.444908	0.719252	down	no
3066	MSTRG.1699.1	1	341	MSTRG.1699	.	0	0	0	0	0	0	9.29912	1.3877	0	0	0	0	0.827105	-0.273858	0.122334	0.459939	down	no
3067	MSTRG.1700.1	1	241	MSTRG.1700	.	8.09129	1.63447	0	0	0	0	0	0	0	0	0	0	1.38172	0.466465	0.456053	0.719252	up	no
3068	MSTRG.1701.1	1	691	MSTRG.1701	.	0	0	9.24457	1.14763	0	0	9.11722	1.36056	0	0	3.63531	0.477879	0.900418	-0.151334	0.797095	0.908049	down	no
3069	MSTRG.1702.1	1	801	MSTRG.1702	.	0	0	0	0	11.2172	1.84381	0	0	0	0	0	0	1.45677	0.542769	0.414641	0.718646	up	no
3070	MSTRG.1703.1	1	388	MSTRG.1703	.	0	0	0	0	0	0	27.2423	4.06535	0	0	0	0	0.701974	-0.510511	0.122334	0.459939	down	no
3071	MSTRG.1704.1	1	380	MSTRG.1704	.	0	0	0	0	0	0	9.13947	1.36388	0	0	0.789474	0.10378	0.79774	-0.32601	0.0790183	0.459939	down	no
3072	MSTRG.1705.1	1	1164	MSTRG.1705	.	0	0	0	0	0	0	13.7406	2.0505	0	0	0	0	0.784073	-0.350941	0.122334	0.459939	down	no
3075	MSTRG.1709.1	1	1048	MSTRG.1709	.	0	0	0	0	0	0	14.0821	2.10146	0	0	1.57443	0.206966	0.726221	-0.461519	0.0734583	0.459939	down	no
3077	MSTRG.1711.1	1	1498	MSTRG.1711	.	4.84646	0.979	0	0	0	0	9.21629	1.37534	0	0	0	0	1.03992	0.0564752	0.897663	0.95557	up	no
3083	MSTRG.1716.1	1	1059	MSTRG.1716	.	0	0	0	0	0	0	9.3881	1.40098	0	0	0	0	0.826105	-0.275603	0.122334	0.459939	down	no
3084	MSTRG.1717.1	1	363	MSTRG.1717	.	6.56198	1.32554	0	0	0	0	0	0	0	0	0	0	1.32538	0.406403	0.456053	0.719252	up	no
3085	MSTRG.1718.1	1	459	MSTRG.1718	.	6.53595	1.32028	0	0	0	0	0	0	5.1634	0.573947	0	0	1.10781	0.147715	0.796382	0.907778	up	no
3094	MSTRG.1723.1	1	6246	MSTRG.1723	.	0	0	6.44763	0.800419	0	0	12.433	1.85537	0	0	0	0	0.952413	-0.0703402	0.888864	0.951554	down	no
3097	MSTRG.1726.1	1	3821	MSTRG.1726	.	4.66291	0.941923	0	0	9.12771	1.50035	10.2638	1.53166	0	0	0	0	1.41739	0.503238	0.211233	0.587361	up	no
3098	MSTRG.1727.1	1	1349	MSTRG.1727	.	5.91412	1.19467	0	0	4.70126	0.772762	12.3011	1.83568	0	0	0	0	1.27269	0.34788	0.334949	0.690493	up	no
3100	MSTRG.1729.1	1	645	MSTRG.1729	.	0	0	0	0	8.89612	1.46229	0	0	0	0	0	0	1.38315	0.467958	0.414641	0.718646	up	no
3102	MSTRG.1731.1	1	979	MSTRG.1731	.	2.29826	0.464256	4.59346	0.570239	3.69561	0.60746	11.6691	1.74137	5.90398	0.656268	3.37079	0.443106	0.882812	-0.179822	0.216159	0.592795	down	no
3103	MSTRG.1732.1	1	717	MSTRG.1732	.	0	0	0	0	0	0	12.0042	1.79138	0	0	0	0	0.799401	-0.323009	0.122334	0.459939	down	no
3104	MSTRG.1733.1	1	2023	MSTRG.1733	.	0	0	0	0	5.95976	0.979625	9.83144	1.46714	1.11765	0.124234	0	0	1.00277	0.00399023	0.989779	0.995709	up	no
3106	MSTRG.1735.1	1	796	MSTRG.1735	.	7.34925	1.48457	0	0	6.26005	1.02899	0	0	0	0	0	0	1.74799	0.805697	0.176737	0.549881	up	no
3107	MSTRG.1736.1	1	1645	MSTRG.1736	.	0	0	5.6535	0.701833	0	0	9.87477	1.47361	0	0	0	0	0.965896	-0.0500597	0.91111	0.961579	down	no
3108	MSTRG.1737.1	1	1691	MSTRG.1737	.	0	0	5.69474	0.706954	0	0	6.86103	1.02387	0	0	0	0	1.01004	0.0144095	0.972626	0.988343	up	no
3126	MSTRG.1744.1	1	416	MSTRG.1744	.	0.721154	0.145675	1.44231	0.17905	0.725962	0.119329	11.6154	1.73336	0	0	0	0	0.920445	-0.119597	0.538123	0.757027	down	no
3139	MSTRG.1747.1	1	6124	MSTRG.1747	.	9.83018	1.98573	15.9948	1.98561	11.864	1.95012	2.67342	0.398953	2.38031	0.264587	3.871	0.508862	2.14722	1.10247	0.00104215	0.124707	up	yes
3144	MSTRG.1749.1	1	258	MSTRG.1749	.	7.55814	1.52677	11.0465	1.37133	14.0465	2.30887	20.9767	3.13035	22.2248	2.47044	15.6977	2.06354	0.795121	-0.330754	0.115874	0.459939	down	no
3155	MSTRG.1754.1	1	4553	MSTRG.1754	.	3.63892	0.735073	0	0	0	0	9.94202	1.48364	14.183	1.57653	0	0	0.679057	-0.558395	0.396127	0.718646	down	no
3158	MSTRG.1755.1	1	219	MSTRG.1755	.	0	0	0	0	0	0	9.65297	1.44051	0	0	0	0	0.823168	-0.280741	0.122334	0.459939	down	no
3183	MSTRG.1762.1	1	244	MSTRG.1762	.	0	0	5.53279	0.686848	1.23771	0.203446	0	0	17.2131	1.91335	3.07377	0.404062	0.721877	-0.470174	0.326678	0.690493	down	no
3187	MSTRG.1763.1	1	269	MSTRG.1763	.	10.2862	2.07785	11.6283	1.44355	15.3903	2.52976	18.5242	2.76435	28.684	3.18842	15.9033	2.09057	0.828485	-0.271452	0.316086	0.690493	down	no
3189	MSTRG.1764.1	1	321	MSTRG.1764	.	6.07477	1.22712	6.07477	0.754131	6.58567	1.08251	4.2243	0.630391	13.5514	1.50633	8.33022	1.09505	0.949316	-0.0750396	0.701396	0.855956	down	no
3193	MSTRG.1769.1	1	792	MSTRG.1769	.	0	0	0	0	4.3851	0.720794	6.07071	0.905929	0	0	3.2197	0.423245	0.920983	-0.118754	0.712338	0.861764	down	no
3194	MSTRG.1771.1	1	678	MSTRG.1771	.	6.58407	1.33	0	0	0	0	0	0	0	0	0	0	1.32623	0.407326	0.456053	0.719252	up	no
3195	MSTRG.1772.1	1	265	MSTRG.1772	.	0	0	0	0	3.41887	0.561971	13.6755	2.04079	0.566038	0.062919	3.39623	0.446451	0.779301	-0.359748	0.17416	0.546195	down	no
3196	MSTRG.1773.1	1	539	MSTRG.1773	.	1.11317	0.224864	0	0	12.0019	1.97279	0	0	3.50649	0.38977	0	0	1.39142	0.476554	0.481199	0.7205	up	no
3200	MSTRG.1770.1	1	387	MSTRG.1770	.	1.55039	0.313183	0	0	0.780362	0.128271	12.4625	1.85978	0	0	0	0	0.909565	-0.136752	0.437746	0.719252	down	no
3215	MSTRG.1777.1	1	246	MSTRG.1777	.	0	0	0	0	0	0	12.2764	1.83201	0	0	0	0	0.796885	-0.327556	0.122334	0.459939	down	no
3223	MSTRG.1778.1	1	463	MSTRG.1778	.	0	0	0	0	0	0	10.1102	1.50873	0	0	0	0	0.818233	-0.289417	0.122334	0.459939	down	no
3224	MSTRG.1779.1	1	748	MSTRG.1779	.	7.21925	1.45831	0	0	0	0	0	0	6.16578	0.685367	0	0	1.09939	0.136699	0.825319	0.922122	up	no
3226	MSTRG.1781.1	1	551	MSTRG.1781	.	0.272232	0.054992	0	0	0	0	10.1397	1.51315	0	0	0	0	0.832665	-0.264191	0.152853	0.514838	down	no
3227	MSTRG.1785.1	1	1011	MSTRG.1785	.	0	0	0	0	0	0	8.51335	1.27044	0	0	5.10648	0.671272	0.685067	-0.545684	0.123286	0.461645	down	no
3228	MSTRG.1786.1	1	598	MSTRG.1786	.	6.52174	1.31741	0	0	0	0	8.18562	1.22154	0	0	0	0	1.11231	0.153556	0.773138	0.895883	up	no
3234	MSTRG.1789.1	1	997	MSTRG.1789	.	0	0	0	0	0	0	10.1474	1.5143	0	0	0	0	0.817837	-0.290114	0.122334	0.459939	down	no
3235	MSTRG.1790.1	1	232	MSTRG.1790	.	0	0	0	0	0	0	14.319	2.13681	0	0	0	0	0.779315	-0.359721	0.122334	0.459939	down	no
3236	MSTRG.1791.1	1	292	MSTRG.1791	.	0	0	0	0	0	0	9.26712	1.38293	0	0	0	0	0.827466	-0.273228	0.122334	0.459939	down	no
3237	MSTRG.1792.1	1	223	MSTRG.1792	.	7.3991	1.49464	0	0	0	0	0	0	0	0	0	0	1.3568	0.440204	0.456053	0.719252	up	no
3238	MSTRG.1793.1	1	265	MSTRG.1793	.	0	0	0.566038	0.070269	0	0	11.966	1.78569	0	0	3.39623	0.446451	0.707542	-0.499111	0.118511	0.459939	down	no
3239	MSTRG.1794.1	1	255	MSTRG.1794	.	0	0	0	0	9.47451	1.55736	0	0	0	0	0	0	1.40214	0.487632	0.414641	0.718646	up	no
3240	MSTRG.1795.1	1	262	MSTRG.1795	.	0	0	0	0	15.5611	2.55783	0	0	0	0	0	0	1.5791	0.6591	0.414641	0.718646	up	no
3241	MSTRG.1796.1	1	458	MSTRG.1796	.	0	0	0	0	0	0	9.68122	1.44473	0	0	0	0	0.822858	-0.281284	0.122334	0.459939	down	no
3244	MSTRG.1799.1	1	900	MSTRG.1799	.	1.66667	0.336672	1.33333	0.165522	0	0	10.7156	1.59908	0	0	0	0	0.937481	-0.0931385	0.727625	0.870347	down	no
3246	MSTRG.1801.1	1	1787	MSTRG.1801	.	0	0	0	0	0	0	9.11472	1.36019	0	0	6.37773	0.838384	0.654624	-0.611262	0.13496	0.483899	down	no
3248	MSTRG.1803.1	1	781	MSTRG.1803	.	0	0	0	0	5.75416	0.945831	9.20102	1.37306	0	0	0	0	1.05247	0.0737853	0.800308	0.909523	up	no
3249	MSTRG.1804.1	1	373	MSTRG.1804	.	0	0	1.60858	0.199691	0	0	9.3941	1.40188	0	0	0	0	0.873403	-0.19528	0.442261	0.719252	down	no
3251	MSTRG.1806.1	1	353	MSTRG.1806	.	2.54108	0.513305	5.02266	0.623521	0.844193	0.138763	11.0878	1.65463	8.88952	0.98813	10.9462	1.43893	0.608884	-0.715761	0.0507455	0.451243	down	no
3255	MSTRG.1810.1	1	639	MSTRG.1810	PDCD7	0	0	0	0	0	0	12.1346	1.81084	0	0	0	0	0.79819	-0.325195	0.122334	0.459939	down	no
3263	MSTRG.1812.1	1	427	MSTRG.1812	.	1.40515	0.283845	5.93208	0.736418	3.88993	0.639401	0	0	0	0	12.8384	1.68767	1.04758	0.067066	0.90471	0.959022	up	no
3265	MSTRG.1813.1	1	466	MSTRG.1813	.	7.72532	1.56054	10.6223	1.31867	5.79828	0.953084	5.43991	0.811796	10.6223	1.18074	10.3004	1.35404	1.04438	0.0626411	0.644447	0.822812	up	no
3298	MSTRG.1819.1	1	1848	MSTRG.1819	.	4.47673	0.904313	9.42965	1.17061	13.9102	2.28646	5.79816	0.865257	0	0	4.4789	0.588773	1.75932	0.815016	0.085578	0.459939	up	no
3308	MSTRG.1822.1	1	535	MSTRG.1822	.	3.36449	0.679636	0	0	4.38131	0.720171	10.4206	1.55506	6.99252	0.777266	0	0	0.939292	-0.0903536	0.818317	0.918611	down	no
3310	MSTRG.1824.1	1	837	MSTRG.1824	ENSSSCG00000030311	0	0	0	0	0	0	10.8244	1.61532	0	0	0	0	0.810841	-0.302509	0.122334	0.459939	down	no
3317	MSTRG.1829.1	1	521	MSTRG.1829	MEGF11	65.9098	13.314	164.904	20.4714	101.096	16.6175	74.5393	11.1235	108.353	12.0442	90.1363	11.8489	1.36841	0.452496	0.0997086	0.459939	up	no
3331	MSTRG.1837.1	1	495	MSTRG.1837	MAP2K1	0	0	0	0	0	0	11.897	1.77538	0	0	0	0	0.800404	-0.3212	0.122334	0.459939	down	no
3365	MSTRG.1851.1	1	1476	MSTRG.1851	.	0	0	0	0	5.0664	0.832781	0	0	0	0	0	0	1.24369	0.314624	0.414641	0.718646	up	no
3367	MSTRG.1852.1	1	258	MSTRG.1852	.	3.47287	0.70153	9.00775	1.11824	10.4961	1.72528	0	0	10.4419	1.16068	5.14729	0.676636	1.30246	0.381242	0.306714	0.68826	up	no
3377	MSTRG.1864.1	1	255	MSTRG.1864	.	12.2706	2.4787	12.1804	1.51209	25.5843	4.20538	15.349	2.29053	35.5451	3.95108	8.82353	1.1599	1.10917	0.149482	0.797386	0.908157	up	no
3388	MSTRG.1868.1	1	813	MSTRG.1868	.	9.06519	1.8312	19.294	2.39518	18.171	2.98683	10.5031	1.56737	22.5892	2.51094	15.8672	2.08582	1.0855	0.118361	0.586171	0.787678	up	no
3392	MSTRG.1875.1	1	533	MSTRG.1875	ENSSSCG00000004963	7.11069	1.43638	0	0	0	0	0	0	0	0	0	0	1.34614	0.428825	0.456053	0.719252	up	no
3395	MSTRG.1878.1	1	1892	MSTRG.1878	ENSSSCG00000004963	7.50899	1.51684	1.14295	0.141887	0	0	0	0	0	0	0	0	1.41725	0.503092	0.37787	0.718234	up	no
3396	MSTRG.1879.1	2	354	MSTRG.1879	ENSSSCG00000004963	7.44491	1.50389	1.33272	0.165446	0.78253	0.128627	1.82486	0.272323	0.529036	0.058806	3.88074	0.510142	1.17556	0.233351	0.656042	0.829765	up	no
3397	MSTRG.1880.1	1	1786	MSTRG.1880	ENSSSCG00000004963	0	0	10.5241	1.30648	0	0	7.06047	1.05363	0	0	7.82363	1.02845	0.838945	-0.253351	0.706518	0.859013	down	no
3398	MSTRG.1869.1	1	1286	MSTRG.1869	.	6.66952	1.34726	0	0	0	0	6.81027	1.01629	0	0	0	0	1.14094	0.190222	0.72424	0.86862	up	no
3403	MSTRG.1881.1	1	232	MSTRG.1881	.	0	0	0	0	0	0	18.8147	2.8077	0	0	11.6379	1.52986	0.521018	-0.940595	0.132912	0.481002	down	no
3423	MSTRG.1885.1	1	267	MSTRG.1885	.	0	0	0	0	0	0	14.7041	2.19429	0	0	0	0	0.776235	-0.365434	0.122334	0.459939	down	no
3426	MSTRG.1888.1	1	351	MSTRG.1888	.	7.69231	1.55387	0	0	0	0	0	0	0	0	0	0	1.36746	0.451503	0.456053	0.719252	up	no
3431	MSTRG.1891.1	1	317	MSTRG.1891	.	0	0	0	0	9.41325	1.54729	0	0	2.32808	0.258781	0	0	1.27888	0.354882	0.558466	0.770043	up	no
3432	MSTRG.1895.1	1	232	MSTRG.1895	.	0	0	0	0	0	0	11.7155	1.7483	0.646552	0.071869	0	0	0.780499	-0.357531	0.0985946	0.459939	down	no
3435	MSTRG.1893.1	1	285	MSTRG.1893	.	0	0	0	0	0	0	10.6596	1.59074	0	0	0	0	0.812513	-0.299537	0.122334	0.459939	down	no
3436	MSTRG.1894.1	1	280	MSTRG.1894	.	0	0	0	0	0	0	10.7857	1.60955	0	0	0	0	0.811232	-0.301814	0.122334	0.459939	down	no
3437	MSTRG.1897.1	1	492	MSTRG.1897	.	1.21951	0.246345	1.81707	0.225574	0	0	13.187	1.96789	0	0	0	0	0.90351	-0.146387	0.617829	0.807955	down	no
3439	MSTRG.1898.1	1	1360	MSTRG.1898	.	3.03676	0.613436	6.39485	0.793867	0	0	11.6162	1.73348	0	0	1.49118	0.196022	1.05108	0.07187	0.8778	0.946579	up	no
3440	MSTRG.1899.1	1	491	MSTRG.1899	.	0	0	0	0	0	0	12.2179	1.82328	0	0	0	0	0.797422	-0.326584	0.122334	0.459939	down	no
3441	MSTRG.1900.1	2	546	MSTRG.1900	.	13.6026	2.74776	10.2192	1.26863	11.196	1.84032	15.1996	2.26823	21.3246	2.37037	14.1531	1.8605	0.92589	-0.111087	0.691563	0.850205	down	no
3444	MSTRG.1903.1	1	280	MSTRG.1903	.	0	0	0	0	11.4929	1.88912	0	0	0	0	0	0	1.46508	0.550978	0.414641	0.718646	up	no
3455	MSTRG.1908.1	1	226	MSTRG.1908	ENSSSCG00000004980	0	0	0	0	9.32743	1.53318	0	0	0	0	0	0	1.39736	0.482699	0.414641	0.718646	up	no
3458	MSTRG.1911.1	1	248	MSTRG.1911	ENSSSCG00000004980	31.4516	6.35332	57.8871	7.18619	47.0524	7.73417	76.6653	11.4407	82.3468	9.1534	77.3468	10.1676	0.734088	-0.445975	0.0162264	0.287889	down	no
3460	MSTRG.1913.1	1	382	MSTRG.1913	.	0	0	0	0	0	0	18.5785	2.77247	0	0	0	0	0.748574	-0.417782	0.122334	0.459939	down	no
3477	MSTRG.1918.1	1	228	MSTRG.1918	.	0	0	11.1316	1.38189	8.49123	1.39573	0	0	0	0	9.71053	1.2765	1.2981	0.376406	0.598219	0.795374	up	no
3478	MSTRG.1920.1	1	276	MSTRG.1920	.	0	0	0	0	0	0	9.69565	1.44688	0	0	0	0	0.8227	-0.281561	0.122334	0.459939	down	no
3489	MSTRG.1927.1	1	2411	MSTRG.1927	.	0	0	0	0	9.2555	1.52136	10.888	1.62481	0	0	0	0	1.13023	0.17662	0.685519	0.846905	up	no
3491	MSTRG.1929.1	1	1213	MSTRG.1929	.	0	0	0	0	0	0	13.9695	2.08466	0	0	0	0	0.78217	-0.354446	0.122334	0.459939	down	no
3492	MSTRG.1930.1	1	762	MSTRG.1930	.	0	0	0	0	0	0	13.9655	2.08406	0	0	14.5538	1.91317	0.516453	-0.953291	0.164744	0.534966	down	no
3493	MSTRG.1925.1	1	326	MSTRG.1925	.	0	0	0	0	0	0	10.1902	1.52068	0	0	0	0	0.817386	-0.290911	0.122334	0.459939	down	no
3494	MSTRG.1931.1	1	234	MSTRG.1931	.	0	0	0	0	0	0	12.2607	1.82966	0	0	0	0	0.79703	-0.327295	0.122334	0.459939	down	no
3495	MSTRG.1932.1	1	407	MSTRG.1932	.	1.4742	0.297793	0	0	0.742015	0.121968	14.8403	2.21461	0	0	0	0	0.881394	-0.182141	0.344958	0.690493	down	no
3496	MSTRG.1933.1	1	660	MSTRG.1933	.	0	0	0	0	0	0	10.9545	1.63474	0	0	0	0	0.809533	-0.304837	0.122334	0.459939	down	no
3501	MSTRG.1934.1	1	233	MSTRG.1934	.	0	0	0.643777	0.079919	0	0	10.3519	1.54482	0	0	1.28755	0.169255	0.785931	-0.347525	0.142332	0.496768	down	no
3502	MSTRG.1935.1	1	215	MSTRG.1935	.	0	0	0	0	14.0465	2.30887	2.8093	0.419231	0	0	0	0	1.42529	0.51126	0.466772	0.719908	up	no
3523	MSTRG.1954.1	1	310	MSTRG.1954	PRPF39	19.3548	3.90974	36.2774	4.50353	32.3129	5.31138	34.3323	5.12339	60.1548	6.68662	56.0032	7.3619	0.736388	-0.441462	0.0630306	0.459939	down	no
3535	MSTRG.1944.1	1	318	MSTRG.1944	.	1.88679	0.381138	0	0	0	0	0	0	0	0	0	0	1.1138	0.155495	0.456053	0.719252	up	no
3536	MSTRG.1945.1	1	412	MSTRG.1945	.	4.34951	0.878615	0	0	1.46602	0.240975	8.42233	1.25686	0	0	0	0	1.117	0.159628	0.624688	0.811448	up	no
3541	MSTRG.1946.1	1	258	MSTRG.1946	.	30.6938	6.20024	50.1434	6.22488	37.8721	6.22517	71.2791	10.6369	94.7016	10.5267	75.9496	9.98395	0.636601	-0.651539	0.000118282	0.0747521	down	no
3546	MSTRG.1950.1	1	3446	MSTRG.1950	.	0	0	0	0	0	0	0	0	0	0	4.09141	0.537836	0.846121	-0.241064	0.344931	0.690493	down	no
3553	MSTRG.1964.1	1	4038	MSTRG.1964	DNAAF2	0	0	0	0	0	0	0	0	28.6476	3.18437	0	0	0.569242	-0.812885	0.327684	0.690493	down	no
3562	MSTRG.1967.1	2	1211	MSTRG.1967	.	0.617671	0.124771	2.21582	0.275075	8.0033	1.31553	1.22874	0.183364	3.80384	0.422822	1.62511	0.213628	1.17963	0.238336	0.583475	0.785868	up	no
3563	MSTRG.1968.1	1	304	MSTRG.1968	.	8.38816	1.69443	0	0	0	0	0	0	0	0	0	0	1.39214	0.477304	0.456053	0.719252	up	no
3564	MSTRG.1972.1	1	485	MSTRG.1972	.	2.35052	0.474811	0	0	10.5856	1.73999	0	0	0	0	1.23711	0.162625	1.54344	0.62615	0.296089	0.677598	up	no
3565	MSTRG.1971.1	1	720	MSTRG.1971	.	1.875	0.378756	5	0.620708	4.40417	0.723928	7.55	1.12668	10.5458	1.17224	6.04167	0.794207	0.782092	-0.35459	0.0925292	0.459939	down	no
3570	MSTRG.1976.1	1	285	MSTRG.1976	.	1.05263	0.212635	10.5263	1.30675	7.94737	1.30634	12.7158	1.89757	17.0947	1.9002	11.5789	1.52211	0.677591	-0.561513	0.225937	0.604367	down	no
3572	MSTRG.1978.1	3	367	MSTRG.1978	.	8.89918	1.79766	9.75989	1.21161	5.96856	0.981072	9.51771	1.42032	4.21218	0.468213	1.92687	0.253297	1.49322	0.578426	0.085639	0.459939	up	no
3573	MSTRG.1979.1	1	1580	MSTRG.1979	.	0	0	3.70063	0.459402	8.58987	1.41195	0	0	7.09304	0.788439	6.32975	0.832076	0.969272	-0.0450266	0.931213	0.970423	down	no
3574	MSTRG.1980.1	1	280	MSTRG.1980	.	0	0	0	0	12.7857	2.10163	0	0	3.00714	0.334264	0	0	1.3417	0.424063	0.564145	0.773528	up	no
3576	MSTRG.1982.1	1	632	MSTRG.1982	.	2.13608	0.431494	0	0	0	0	12.663	1.88969	0	0	0	0	0.894305	-0.161161	0.570819	0.777616	down	no
3579	MSTRG.1987.1	3	1572	MSTRG.1987	L2HGDH	4.73704	0.956897	15.2354	1.89134	9.10982	1.49741	19.1953	2.86451	9.04588	1.00551	10.9658	1.4415	0.964029	-0.0528518	0.846721	0.93266	down	no
3580	MSTRG.1987.2	3	1422	MSTRG.1987	L2HGDH	6.05094	1.22231	7.89358	0.979921	4.84421	0.796259	2.58714	0.386078	9.91694	1.10234	5.29613	0.696202	1.12492	0.16982	0.302829	0.683662	up	no
3582	MSTRG.1989.1	1	979	MSTRG.1989	L2HGDH	9.11951	1.84217	13.2993	1.65099	0	0	0	0	8.72727	0.970095	0	0	1.46273	0.548667	0.434754	0.719252	up	no
3583	MSTRG.1990.1	1	648	MSTRG.1990	L2HGDH	0	0	13.6219	1.69104	11.3657	1.86823	0	0	0	0	11.1852	1.47035	1.39284	0.47803	0.562137	0.772302	up	no
3585	MSTRG.1991.1	1	1249	MSTRG.1991	L2HGDH	6.64051	1.3414	14.3395	1.78012	12.8719	2.1158	8.57886	1.28022	13.5821	1.50974	6.11938	0.804422	1.26496	0.339091	0.208256	0.584526	up	no
3587	MSTRG.1993.1	1	235	MSTRG.1993	ATP5S	0	0	0	0	8.31064	1.36605	0	0	0	0	0	0	1.36344	0.447253	0.414641	0.718646	up	no
3592	MSTRG.1984.1	1	2075	MSTRG.1984	.	3.25301	0.657118	0	0	0	0	11.9764	1.78723	10.2448	1.13878	0	0	0.701702	-0.511069	0.368416	0.710729	down	no
3608	MSTRG.1998.1	1	213	MSTRG.1998	ABHD12B	0	0	0	0	0	0	9.92488	1.48109	0	0	0	0	0.820213	-0.28593	0.122334	0.459939	down	no
3614	MSTRG.1996.1	1	235	MSTRG.1996	.	3.6	0.727211	8.02128	0.995773	1.92766	0.316856	13.7447	2.05111	8.85957	0.984801	8.85532	1.16407	0.726329	-0.461304	0.17187	0.542992	down	no
3618	MSTRG.2004.1	1	753	MSTRG.2004	.	1.59363	0.321917	1.58566	0.196846	0	0	8.98406	1.34069	0	0	0	0	0.963384	-0.0538176	0.833329	0.926361	down	no
3620	MSTRG.2006.1	1	208	MSTRG.2006	.	0.721154	0.145675	1.44231	0.17905	0	0	13.0817	1.95218	0	0	0	0	0.86912	-0.202373	0.45858	0.719908	down	no
3621	MSTRG.2007.1	1	447	MSTRG.2007	.	0.66443	0.134217	0	0	0	0	9.783	1.45991	2.01342	0.223806	0.671141	0.088225	0.765969	-0.384642	0.0799561	0.459939	down	no
3622	MSTRG.2008.1	1	330	MSTRG.2008	.	0.909091	0.183639	2.72727	0.338568	5.03333	0.827346	12.8576	1.91873	0	0	0	0	1.13765	0.186057	0.330717	0.690493	up	no
3623	MSTRG.2009.1	1	208	MSTRG.2009	.	4.69231	0.94786	0	0	2.69231	0.442544	17.4231	2.60004	3.91346	0.435008	0	0	0.935087	-0.0968271	0.789878	0.904864	down	no
3625	MSTRG.2011.1	1	228	MSTRG.2011	.	2.63158	0.531587	0	0	1.32456	0.217723	10.5965	1.58131	0	0	0	0	1.00639	0.00919309	0.964289	0.984497	up	no
3626	MSTRG.2012.1	1	450	MSTRG.2012	.	0	0	0.666667	0.082761	0	0	9.79111	1.46112	0	0	0	0	0.841913	-0.248257	0.24408	0.623354	down	no
3627	MSTRG.2013.1	1	344	MSTRG.2013	.	0	0	0	0	0	0	9.65698	1.44111	0	0	0	0	0.823124	-0.280818	0.122334	0.459939	down	no
3628	MSTRG.2014.1	1	250	MSTRG.2014	.	0	0	0	0	0	0	13.288	1.98296	0.6	0.066694	0	0	0.768138	-0.380563	0.100864	0.459939	down	no
3632	MSTRG.2019.1	2	10983	MSTRG.2019	.	8.90854	1.79955	17.5337	2.17666	12.0587	1.98213	12.9828	1.93742	13.7977	1.53371	11.6172	1.52714	1.13881	0.187523	0.0867199	0.459939	up	no
3633	MSTRG.2017.1	1	1319	MSTRG.2017	.	6.57165	1.32749	7.44579	0.924332	4.57468	0.751955	4.30402	0.642287	6.65656	0.739921	4.77635	0.627874	1.18399	0.243651	0.18808	0.563892	up	no
3634	MSTRG.2018.1	1	1214	MSTRG.2018	.	4.17957	0.844286	10.7183	1.33058	8.26936	1.35926	0	0	5.80231	0.644965	0	0	1.77977	0.831687	0.0581492	0.459939	up	no
3642	MSTRG.2022.1	1	265	MSTRG.2022	PTGER2	0	0	0	0	0	0	10.2566	1.53059	0	0	0	0	0.816686	-0.292146	0.122334	0.459939	down	no
3661	MSTRG.2036.1	1	253	MSTRG.2036	.	5.917	1.19525	14.7984	1.8371	16.6877	2.74302	9.54941	1.42505	9.48617	1.05445	10.0672	1.32338	1.28786	0.364976	0.251842	0.63241	up	no
3662	MSTRG.2037.1	1	293	MSTRG.2037	.	5.08874	1.02794	0	0	0	0	12.8703	1.92063	0	0	0	0	1.00223	0.00321201	0.994469	0.997832	up	no
3663	MSTRG.2038.1	1	897	MSTRG.2038	.	0	0	5.85284	0.726581	0	0	8.44593	1.26038	2.49944	0.27783	2.81339	0.369834	0.795088	-0.330813	0.438492	0.719252	down	no
3664	MSTRG.2039.1	1	216	MSTRG.2039	.	8.33333	1.68336	7.61111	0.944855	0	0	0	0	0	0	2.77778	0.365153	1.51033	0.594869	0.316406	0.690493	up	no
3665	MSTRG.2040.1	1	239	MSTRG.2040	.	0	0	0	0	0	0	10.5565	1.57534	0	0	0	0	0.81357	-0.297662	0.122334	0.459939	down	no
3669	MSTRG.2043.1	1	312	MSTRG.2043	DDHD1	0	0	0	0	0	0	0	0	0	0	21.0481	2.76687	0.597553	-0.742861	0.344931	0.690493	down	no
3672	MSTRG.2045.1	1	243	MSTRG.2045	.	6.17284	1.24693	14.0494	1.74411	14.749	2.42434	11.1852	1.66916	12.2222	1.35858	11.0288	1.44979	1.13052	0.17699	0.436304	0.719252	up	no
3673	MSTRG.2046.1	1	217	MSTRG.2046	.	0	0	0	0	0	0	12.5253	1.86915	0	0	0	0	0.794624	-0.331656	0.122334	0.459939	down	no
3675	MSTRG.2047.1	1	430	MSTRG.2047	.	0	0	0	0	0	0	11.2093	1.67276	0	0	0	0	0.807008	-0.309345	0.122334	0.459939	down	no
3680	MSTRG.2049.1	1	2835	MSTRG.2049	.	33.1623	6.69888	58.7894	7.29821	48.0928	7.90517	74.1019	11.0582	61.2744	6.81107	60.8356	7.99714	0.91512	-0.127967	0.257398	0.638492	down	no
3681	MSTRG.2051.1	1	410	MSTRG.2051	.	2.19512	0.443421	8	0.993132	0	0	9.9439	1.48392	0	0	0	0	1.14486	0.195175	0.699354	0.854716	up	no
3685	MSTRG.2050.1	1	221	MSTRG.2050	.	0	0	0	0	0	0	9.56561	1.42747	0	0	0	0	0.82413	-0.279056	0.122334	0.459939	down	no
3686	MSTRG.2053.1	1	669	MSTRG.2053	.	3.9133	0.790499	0	0	0	0	13.4798	2.01159	0	0	6.27803	0.825277	0.75605	-0.403447	0.433973	0.719252	down	no
3688	MSTRG.2055.1	1	1364	MSTRG.2055	.	8.2456	1.66564	0	0	4.97947	0.818493	0	0	0	0	0	0	1.72033	0.78269	0.199081	0.57494	up	no
3690	MSTRG.2057.1	1	812	MSTRG.2057	.	0.738916	0.149263	0	0	3.71921	0.61134	4.64902	0.693771	0	0	12.67	1.66553	0.757747	-0.400213	0.5035	0.734866	down	no
3699	MSTRG.2061.1	1	219	MSTRG.2061	.	6.84931	1.38358	0	0	0	0	0	0	0	0	0	0	1.33633	0.418274	0.456053	0.719252	up	no
3701	MSTRG.2063.1	1	1048	MSTRG.2063	.	0	0	0	0	0	0	10.8006	1.61176	0	0	0	0	0.811081	-0.302081	0.122334	0.459939	down	no
3704	MSTRG.2069.1	1	242	MSTRG.2069	.	0.619835	0.125209	1.22727	0.152356	6.23967	1.02564	10.6074	1.58294	0	0	0	0	1.13875	0.187455	0.450402	0.719252	up	no
3705	MSTRG.2070.1	2	1655	MSTRG.2070	SOCS4	2.25015	0.454537	2.6145	0.324568	1.26298	0.2076	8.76073	1.30736	11.9263	1.32569	12.0199	1.58008	0.546871	-0.870728	0.00325842	0.173147	down	no
3711	MSTRG.2064.1	1	271	MSTRG.2064	.	1.10701	0.22362	2.76753	0.343565	11.6421	1.91365	0	0	3.32103	0.369155	0	0	1.52056	0.604598	0.311467	0.690493	up	no
3712	MSTRG.2065.1	1	408	MSTRG.2065	.	0	0	0	0	0	0	11.1029	1.65689	2.31365	0.257178	0	0	0.738439	-0.437449	0.0901438	0.459939	down	no
3718	MSTRG.2075.1	1	297	MSTRG.2075	.	0	0	4.0404	0.501582	0	0	9.58923	1.431	0	0	2.0202	0.265565	0.851559	-0.231822	0.547258	0.7628	down	no
3721	MSTRG.2078.1	1	1043	MSTRG.2078	.	3.44295	0.695487	0	0	5.76031	0.946841	7.93289	1.18382	12.8322	1.42639	0	0	0.901905	-0.148952	0.795032	0.907246	down	no
3722	MSTRG.2080.1	1	211	MSTRG.2080	.	0	0	0	0	0	0	10.019	1.49513	0	0	0	0	0.819204	-0.287705	0.122334	0.459939	down	no
3723	MSTRG.2081.1	1	1425	MSTRG.2081	.	6.93684	1.40126	0	0	0	0	0	0	11.0442	1.22764	0	0	0.977364	-0.0330318	0.96149	0.983091	down	no
3724	MSTRG.2082.1	1	2063	MSTRG.2082	.	0	0	5.83325	0.724149	8.53417	1.40279	0	0	0	0	0	0	1.61993	0.695932	0.204433	0.580625	up	no
3725	MSTRG.2083.1	1	581	MSTRG.2083	.	0	0	0	0	0	0	15.7952	2.35711	0	0	0	0	0.767864	-0.381078	0.122334	0.459939	down	no
3726	MSTRG.2084.1	1	2780	MSTRG.2084	.	0	0	8.42961	1.04646	4.65827	0.765696	9.87878	1.47421	0	0	0	0	1.25405	0.326599	0.490468	0.726707	up	no
3727	MSTRG.2085.1	1	3070	MSTRG.2085	.	5.80965	1.17357	0	0	0	0	13.0619	1.94922	0.847033	0.094153	4.478	0.588655	0.8254	-0.276834	0.606777	0.800477	down	no
3728	MSTRG.2079.1	1	216	MSTRG.2079	.	2.50926	0.506878	4.86111	0.603466	4.89352	0.804364	16.4815	2.45953	4.16667	0.463153	5.98148	0.786295	0.85913	-0.219052	0.176262	0.549261	down	no
3739	MSTRG.2092.1	2	6576	MSTRG.2092	KTN1	7.23282	1.46105	0.204684	0.02541	10.6986	1.75856	9.3927	1.40167	0.206138	0.022914	14.5161	1.90821	1.06084	0.0852126	0.909221	0.960859	up	no
3741	MSTRG.2089.1	1	601	MSTRG.2089	.	0	0	0	0	0	0	10.5125	1.56877	7.6068	0.845547	0	0	0.639554	-0.644861	0.139107	0.491106	down	no
3742	MSTRG.2090.1	1	488	MSTRG.2090	.	5.45777	1.10249	0	0	88.8422	14.6033	196.1	29.264	0	0	89.7254	11.7948	0.608753	-0.716072	0.684265	0.846224	down	no
3745	MSTRG.2095.1	1	584	MSTRG.2095	TMEM260	0	0	0	0	9.56678	1.57252	0	0	0	0	0	0	1.40513	0.490703	0.414641	0.718646	up	no
3747	MSTRG.2096.1	1	4589	MSTRG.2096	.	41.8588	8.4556	70.1042	8.70284	53.2626	8.75495	80.5138	12.015	68.5415	7.61885	60.5097	7.9543	1.00709	0.0101892	0.87407	0.945177	up	no
3754	MSTRG.2097.1	1	1245	MSTRG.2097	.	0	0	0	0	8.10602	1.33241	0	0	4.90201	0.544891	6.47952	0.851764	0.899808	-0.152311	0.796561	0.907844	down	no
3757	MSTRG.2104.1	1	477	MSTRG.2104	.	0	0	0	0	0	0	13.478	2.01132	13.2075	1.46811	0	0	0.55097	-0.859955	0.15864	0.524573	down	no
3758	MSTRG.2105.1	1	833	MSTRG.2105	.	51.3133	10.3654	79.5234	9.87215	61.533	10.1144	83.9652	12.5301	89.6795	9.96848	69.6807	9.15986	0.997879	-0.0030636	0.956627	0.980982	down	no
3759	MSTRG.2106.1	1	1549	MSTRG.2106	.	6.26404	1.26536	9.57456	1.1886	0	0	18.9406	2.8265	0	0	0	0	1.24624	0.317583	0.640954	0.820762	up	no
3760	MSTRG.2107.1	1	232	MSTRG.2107	.	0	0	0	0	3.90517	0.641906	11.1767	1.6679	0	0	0	0	0.965092	-0.0512615	0.781414	0.900656	down	no
3761	MSTRG.2101.1	1	320	MSTRG.2101	.	0	0	1.875	0.232765	0	0	9.74687	1.45452	1.875	0.208419	0	0	0.813605	-0.2976	0.315221	0.690493	down	no
3765	MSTRG.2112.1	1	404	MSTRG.2112	C14orf105	4.27723	0.864013	0	0	10.5322	1.73121	0	0	12.69	1.41057	7.31471	0.961555	0.962328	-0.0553997	0.932162	0.970901	down	no
3766	MSTRG.2113.1	1	303	MSTRG.2113	C14orf105	7.92079	1.60002	0	0	0	0	0	0	0	0	0	0	1.37566	0.460128	0.456053	0.719252	up	no
3777	MSTRG.2116.1	1	336	MSTRG.2116	PSMA3	6.25	1.26252	8.91667	1.10693	3.14583	0.517091	8.07738	1.20538	0.892857	0.099247	13.0714	1.7183	1.0542	0.0761541	0.888013	0.951083	up	no
3778	MSTRG.2117.1	1	564	MSTRG.2117	PSMA3	0	0	0	0	0	0	13.0727	1.95083	0	0	0	0	0.789774	-0.340489	0.122334	0.459939	down	no
3779	MSTRG.2118.1	1	964	MSTRG.2118	PSMA3	9.6473	1.94878	0	0	0	0	14.6442	2.18535	0	0	0	0	1.11434	0.15619	0.820522	0.919742	up	no
3780	MSTRG.2119.1	3	10052	MSTRG.2119	.	6.99005	1.41201	10.6784	1.32563	2.97124	0.488392	4.86601	0.726153	11.9563	1.32902	9.88243	1.29909	0.923503	-0.114811	0.642319	0.821616	down	no
3781	MSTRG.2119.2	3	2155	MSTRG.2119	.	0.369575	0.074655	1.85296	0.230029	3.42334	0.562706	7.3452	1.09612	0.4114	0.04573	0.614074	0.080723	1.03974	0.0562288	0.725704	0.869452	up	no
3783	MSTRG.2121.1	1	298	MSTRG.2121	ARID4A	3.42953	0.692775	13.5705	1.68466	0	0	8	1.19384	0	0	12.8121	1.68421	0.926283	-0.110475	0.884714	0.949567	down	no
3801	MSTRG.2129.1	1	923	MSTRG.2129	.	4.13651	0.835588	13.9762	1.73502	7.80932	1.28364	5.72589	0.854473	0	0	3.40953	0.4482	1.6983	0.764095	0.0772394	0.459939	up	no
3802	MSTRG.2130.1	1	1116	MSTRG.2130	.	5.57527	1.12622	0	0	5.11111	0.840131	3.11201	0.464404	0	0	0	0	1.4742	0.55993	0.200883	0.577039	up	no
3803	MSTRG.2131.1	1	423	MSTRG.2131	.	0	0	11.096	1.37747	11.0591	1.81782	5.71158	0.852338	0	0	0	0	1.65481	0.726666	0.269649	0.650919	up	no
3804	MSTRG.2133.1	1	581	MSTRG.2133	.	2.0654	0.417218	11.7866	1.4632	4.13769	0.680127	0.259897	0.038784	0	0	1.54905	0.203631	1.64704	0.719875	0.0840444	0.459939	up	no
3815	MSTRG.2138.1	1	257	MSTRG.2138	LRRC9	1.15564	0.233443	0	0	0	0	10.5292	1.57127	0	0	0	0	0.872889	-0.196131	0.358779	0.703119	down	no
3817	MSTRG.2135.1	1	239	MSTRG.2135	.	0	0	0	0	0	0	10.1088	1.50853	0	0	0.573222	0.075353	0.79549	-0.330084	0.0869928	0.459939	down	no
3822	MSTRG.2140.1	1	550	MSTRG.2140	.	0	0	3.54546	0.440138	0	0	8.23636	1.22911	13.7564	1.52911	0	0	0.65156	-0.618029	0.318638	0.690493	down	no
3823	MSTRG.2141.1	1	565	MSTRG.2141	.	7.10619	1.43547	0	0	0	0	0	0	0	0	0	0	1.34597	0.428645	0.456053	0.719252	up	no
3824	MSTRG.2142.1	1	1389	MSTRG.2142	.	0	0	0	0	0	0	11.5961	1.73048	0	0	0	0	0.803256	-0.316069	0.122334	0.459939	down	no
3825	MSTRG.2143.1	1	348	MSTRG.2143	.	9.48276	1.91555	0	0	0	0	0	0	0	0	0	0	1.42927	0.515283	0.456053	0.719252	up	no
3826	MSTRG.2144.1	1	282	MSTRG.2144	.	1.06383	0.214897	4.24468	0.526941	10.7092	1.76031	0	0	0	0	5.82979	0.766354	1.40384	0.489375	0.414894	0.718877	up	no
3829	MSTRG.2150.1	1	482	MSTRG.2150	.	0	0	0	0	0	0	15.0373	2.24402	0	0	0	0	0.773624	-0.370295	0.122334	0.459939	down	no
3830	MSTRG.2147.1	1	1350	MSTRG.2147	.	0	0	0	0	0	0	9.56	1.42664	0	0	0	0	0.824192	-0.278947	0.122334	0.459939	down	no
3833	MSTRG.2148.1	1	236	MSTRG.2148	.	3.81356	0.770351	1.90678	0.236711	1.91949	0.315513	0	0	8.26271	0.918456	10.5085	1.38139	0.787479	-0.344687	0.278004	0.659718	down	no
3834	MSTRG.2151.1	1	977	MSTRG.2151	.	7.63664	1.54262	0	0	0	0	0	0	2.41044	0.267937	0	0	1.24363	0.314561	0.600609	0.797089	up	no
3836	MSTRG.2153.1	1	1129	MSTRG.2153	SIX1	0	0	10.8291	1.34434	0	0	1.60496	0.239508	0	0	2.35955	0.310174	1.11539	0.15755	0.77183	0.895172	up	no
3837	MSTRG.2154.1	1	723	MSTRG.2154	.	7.25311	1.46515	12.5353	1.55615	6.58645	1.08264	0.417704	0.062334	4.24066	0.471378	3.3195	0.436365	1.7278	0.78894	0.00113493	0.128989	up	no
3845	MSTRG.2161.1	1	286	MSTRG.2161	.	0	0	0	0	0	0	9.5035	1.4182	0	0	0	0	0.824818	-0.277852	0.122334	0.459939	down	no
3846	MSTRG.2162.1	1	204	MSTRG.2162	.	6.61765	1.33678	0	0	4.44118	0.730011	0	0	0	0	0	0	1.61707	0.693382	0.192956	0.567982	up	no
3847	MSTRG.2163.1	1	534	MSTRG.2163	.	0	0	2.24719	0.27897	1.69663	0.278881	12.8052	1.91092	0	0	4.21348	0.553883	0.786423	-0.346623	0.298938	0.680431	down	no
3848	MSTRG.2164.1	1	271	MSTRG.2164	.	0	0	0	0	0	0	10.0886	1.50551	0.553506	0.061526	0	0	0.79945	-0.322921	0.0994243	0.459939	down	no
3853	MSTRG.2168.1	1	286	MSTRG.2168	SLC38A6	0	0	2.02406	0.25127	0	0	11.0874	1.65457	0	0	0	0	0.865642	-0.208158	0.478196	0.719908	down	no
3854	MSTRG.2169.1	1	945	MSTRG.2169	SLC38A6	2.06349	0.416832	7.45079	0.924953	0	0	8.75661	1.30675	7.29841	0.811268	5.86455	0.770924	0.725306	-0.463337	0.273485	0.655019	down	no
3855	MSTRG.2170.1	1	1032	MSTRG.2170	SLC38A6	0	0	0	0	0	0	9.65698	1.44111	0	0	0	0	0.823124	-0.280818	0.122334	0.459939	down	no
3856	MSTRG.2171.1	1	238	MSTRG.2171	SLC38A6	0	0	0	0	8.67647	1.42618	0	0	0	0	0	0	1.37581	0.460286	0.414641	0.718646	up	no
3857	MSTRG.2172.1	1	543	MSTRG.2172	SLC38A6	0	0	3.02026	0.374939	1.34643	0.221318	13.0295	1.94438	0	0	3.30939	0.435036	0.813604	-0.297602	0.380188	0.718646	down	no
3861	MSTRG.2173.1	1	233	MSTRG.2173	.	0	0	0	0	0	0	12.3133	1.83751	0	0	0	0	0.796548	-0.328167	0.122334	0.459939	down	no
3862	MSTRG.2175.1	1	218	MSTRG.2175	.	0	0	0	0	0	0	10.3899	1.55048	0	0	0	0	0.815293	-0.29461	0.122334	0.459939	down	no
3865	MSTRG.2176.1	1	1720	MSTRG.2176	.	0	0	0	0	8.33837	1.37061	3.41686	0.509897	4.19402	0.466194	0	0	1.07272	0.101277	0.848648	0.933418	up	no
3866	MSTRG.2177.1	1	433	MSTRG.2177	.	0	0	11.6051	1.44067	8.16628	1.34232	9.76443	1.45714	0	0	0	0	1.46751	0.553367	0.362426	0.706307	up	no
3869	MSTRG.2181.1	1	394	MSTRG.2181	.	8.75634	1.76881	0	0	0	0	0	0	0	0	0	0	1.40485	0.490416	0.456053	0.719252	up	no
3871	MSTRG.2183.1	1	312	MSTRG.2183	.	6.73077	1.35964	0	0	0	0	3.36859	0.502693	0	0	0	0	1.21863	0.285264	0.599314	0.796181	up	no
3874	MSTRG.2185.1	1	320	MSTRG.2185	.	0	0	0	0	0	0	9.4375	1.40836	0	0	0	0	0.825553	-0.276568	0.122334	0.459939	down	no
3875	MSTRG.2186.1	1	745	MSTRG.2186	.	0	0	0	0	0	0	0	0	5.8349	0.648588	6.84161	0.899363	0.640274	-0.64324	0.0109906	0.250591	down	no
3877	MSTRG.2188.1	1	2536	MSTRG.2188	.	0	0	0	0	7.26853	1.19475	6.54022	0.975995	0	0	1.84228	0.242177	1.0515	0.0724479	0.859432	0.93845	up	no
3881	MSTRG.2191.1	1	415	MSTRG.2191	.	0	0	1.36868	0.169909	0	0	10.8916	1.62534	0	0	0	0	0.850051	-0.234379	0.366413	0.709157	down	no
3882	MSTRG.2192.1	1	421	MSTRG.2192	.	0.712589	0.143945	0	0	8.23515	1.35364	1.43468	0.214097	0	0	0	0	1.36437	0.448238	0.354828	0.699205	up	no
3893	MSTRG.2195.1	1	247	MSTRG.2195	DET1	0	0	0	0	8.5587	1.40682	0	0	0	0	0	0	1.37185	0.456126	0.414641	0.718646	up	no
3900	MSTRG.2210.1	1	434	MSTRG.2210	.	7.15207	1.44474	0	0	0	0	0	0	0	0	0	0	1.34768	0.430474	0.456053	0.719252	up	no
3908	MSTRG.2200.1	1	417	MSTRG.2200	.	2.8777	0.581304	3.58993	0.445659	2.8777	0.473017	12.6523	1.8881	7.45564	0.828744	0	0	0.938296	-0.0918848	0.795965	0.907709	down	no
3910	MSTRG.2202.1	1	851	MSTRG.2202	.	6.86721	1.3872	0	0	5.86839	0.964607	5.14571	0.767892	0	0	0	0	1.50568	0.59041	0.21842	0.595296	up	no
3919	MSTRG.2208.1	1	309	MSTRG.2208	ENSSSCG00000005113	6.79612	1.37284	0	0	0	0	0	0	0	0	0	0	1.33431	0.416098	0.456053	0.719252	up	no
3920	MSTRG.2212.1	1	279	MSTRG.2212	.	0	0	0	0	0	0	1.08244	0.161532	16.595	1.84464	0	0	0.641342	-0.640834	0.296471	0.678154	down	no
3933	MSTRG.2214.1	1	217	MSTRG.2214	IFT74	0	0	1.38249	0.171624	0	0	9.74194	1.45379	0	0	0	0	0.86306	-0.212467	0.389799	0.718646	down	no
3934	MSTRG.2215.1	1	208	MSTRG.2215	IFT74	0.721154	0.145675	0	0	4.35577	0.715973	10.1635	1.51669	0	0	0	0	1.03922	0.0554991	0.724329	0.86862	up	no
3936	MSTRG.2217.1	1	230	MSTRG.2217	LRRC19	0	0	0	0	1.31304	0.215829	18.3826	2.74323	1.95652	0.217481	0	0	0.744529	-0.425601	0.0706002	0.459939	down	no
3944	MSTRG.2221.1	1	252	MSTRG.2221	.	0	0	0	0	0	0	9.5873	1.43071	0	0	0	0	0.823891	-0.279475	0.122334	0.459939	down	no
3947	MSTRG.2222.1	1	488	MSTRG.2222	.	4.7541	0.960342	11.9754	1.48664	8.97336	1.47498	3.40369	0.507931	4.61066	0.512505	3.94672	0.518816	1.51458	0.59892	0.020387	0.31296	up	no
3948	MSTRG.2223.1	1	508	MSTRG.2223	.	6.49606	1.31222	2.3563	0.292515	2.37795	0.390872	0	0	2.55315	0.2838	0.590551	0.077631	1.41872	0.50459	0.217402	0.594251	up	no
3952	MSTRG.2226.1	1	374	MSTRG.2226	.	4.41176	0.89119	13.6043	1.68885	0	0	0	0	0	0	0	0	1.67465	0.74386	0.214295	0.59061	up	no
3953	MSTRG.2227.1	1	277	MSTRG.2227	.	7.23466	1.46142	0	0	0	0	0	0	0	0	0	0	1.35074	0.433749	0.456053	0.719252	up	no
3954	MSTRG.2228.1	1	439	MSTRG.2228	.	0	0	0	0	0	0	9.63098	1.43723	0.683371	0.075961	0	0	0.800017	-0.321897	0.0958577	0.459939	down	no
3955	MSTRG.2229.1	1	228	MSTRG.2229	.	0	0	0	0	0	0	19.8684	2.96496	0	0	0	0	0.740493	-0.433442	0.122334	0.459939	down	no
3956	MSTRG.2230.1	1	334	MSTRG.2230	.	6.73653	1.3608	0	0	0	0	0	0	0	0	0	0	1.33205	0.413649	0.456053	0.719252	up	no
3957	MSTRG.2231.1	1	903	MSTRG.2231	.	0	0	8.59136	1.06655	6.01993	0.989517	8.68881	1.29663	0	0	0	0	1.33453	0.416328	0.398872	0.718646	up	no
3959	MSTRG.2232.1	1	218	MSTRG.2232	.	0	0	0	0	0	0	10.3899	1.55048	0	0	0	0	0.815293	-0.29461	0.122334	0.459939	down	no
3967	MSTRG.2238.1	1	3904	MSTRG.2238	.	6.21132	1.25471	9.81198	1.21807	7.94775	1.3064	13.7864	2.05734	0	0	0	0	1.77255	0.825828	0.0110184	0.250922	up	no
3968	MSTRG.2239.1	1	209	MSTRG.2239	.	0	0	0	0	0	0	9.70335	1.44803	0	0	0	0	0.822616	-0.281709	0.122334	0.459939	down	no
3970	MSTRG.2241.1	1	1077	MSTRG.2241	ENSSSCG00000005134	1.81059	0.365744	5.09885	0.632978	0	0	10.3398	1.54301	0	0	0	0	1.05196	0.073084	0.85609	0.936708	up	no
3972	MSTRG.2243.1	1	1568	MSTRG.2243	.	3.63265	0.733807	0	0	0	0	7.42464	1.10798	0	0	10.1677	1.3366	0.734574	-0.44502	0.451826	0.719252	down	no
3975	MSTRG.2244.1	1	575	MSTRG.2244	.	3.39652	0.686108	6.9073	0.857483	6.49591	1.06776	4.12296	0.615267	7.8113	0.868279	10.6941	1.40579	0.93619	-0.0951262	0.628806	0.813422	down	no
3976	MSTRG.2250.1	2	7863	MSTRG.2250	ENSSSCG00000018175	10.7892	2.17946	26.0034	3.2281	14.981	2.46247	29.7529	4.44001	31.2082	3.469	23.7786	3.12581	0.791103	-0.338062	0.143007	0.498122	down	no
3977	MSTRG.2251.1	1	1500	MSTRG.2251	.	19.1407	3.86647	36.886	4.57908	26.2867	4.32083	52.3087	7.806	40.0633	4.45331	34.4813	4.53274	0.860704	-0.216411	0.149083	0.508869	down	no
3980	MSTRG.2254.1	1	863	MSTRG.2254	.	0	0	13.3384	1.65584	0	0	10.8355	1.61697	12.7509	1.41735	0	0	0.77248	-0.37243	0.651264	0.826851	down	no
3981	MSTRG.2246.1	1	1126	MSTRG.2246	.	10.3064	2.08192	5.04742	0.626594	0	0	0	0	0	0	0	0	1.68991	0.756949	0.261304	0.642692	up	no
3984	MSTRG.2249.1	1	1255	MSTRG.2249	.	0	0	0	0	3.46295	0.569217	9.05498	1.35127	0	0	0	0	0.976015	-0.0350246	0.837144	0.928339	down	no
3987	MSTRG.2256.1	1	204	MSTRG.2256	CH242-81E23.2-001	6.61765	1.33678	0	0	2.22059	0.365006	7.40196	1.10459	8.70588	0.967717	0	0	0.967121	-0.0482319	0.932347	0.970984	down	no
4017	MSTRG.2272.1	1	303	MSTRG.2272	IFN-OMEGA-2	0	0	13.3564	1.65809	0	0	2.49175	0.371843	1.48515	0.165084	4.45545	0.58569	0.991337	-0.0125522	0.983518	0.99308	down	no
4072	MSTRG.2286.1	1	252	MSTRG.2286	.	0	0	6.54762	0.812831	4.19444	0.689455	15.9246	2.37642	1.78571	0.198494	0	0	1.03488	0.0494607	0.906869	0.959884	up	no
4073	MSTRG.2287.1	1	229	MSTRG.2287	.	7.86026	1.5878	0	0	0	0	3.29694	0.492002	0	0	0	0	1.25872	0.331957	0.581406	0.784459	up	no
4085	MSTRG.2296.1	1	265	MSTRG.2296	SH3GL2	0	0	0	0	0	0	10.2566	1.53059	0	0	0	0	0.816686	-0.292146	0.122334	0.459939	down	no
4086	MSTRG.2297.1	1	212	MSTRG.2297	SH3GL2	0	0	0.707547	0.087836	0	0	9.25943	1.38178	0	0	0	0	0.849167	-0.235879	0.257887	0.639219	down	no
4088	MSTRG.2299.1	1	251	MSTRG.2299	SH3GL2	8.36653	1.69006	0	0	1.80478	0.296658	0	0	2.98805	0.332142	0	0	1.36468	0.448567	0.455413	0.719252	up	no
4090	MSTRG.2302.1	1	289	MSTRG.2302	CNTLN	3.11419	0.629075	4.15225	0.515466	0	0	9.37024	1.39832	1.03806	0.115388	3.86159	0.507625	0.90216	-0.148544	0.703898	0.857458	down	no
4093	MSTRG.2300.1	1	225	MSTRG.2300	.	4	0.808012	0	0	9.75555	1.60355	0	0	4.66667	0.518731	0	0	1.45882	0.544799	0.377637	0.718077	up	no
4107	MSTRG.2312.1	1	253	MSTRG.2312	TTC39B	0	0	0	0	8.80632	1.44753	0	0	0	0	0	0	1.38016	0.464835	0.414641	0.718646	up	no
4109	MSTRG.2309.1	1	835	MSTRG.2309	.	3.57605	0.722373	4.49102	0.557522	7.58084	1.24609	3.97485	0.593165	8.08024	0.898173	3.77245	0.495908	1.10322	0.141726	0.565791	0.774387	up	no
4110	MSTRG.2313.1	1	928	MSTRG.2313	.	0	0	11.2586	1.39766	0	0	0	0	0	0	0	0	1.3071	0.386372	0.480118	0.719908	up	no
4118	MSTRG.2314.1	1	467	MSTRG.2314	.	0	0	0	0	0	0	14.227	2.12309	0	0	0	0	0.780061	-0.358341	0.122334	0.459939	down	no
4119	MSTRG.2315.1	1	262	MSTRG.2315	.	0	0	0	0	0	0	9.03054	1.34762	0	0	0	0	0.830164	-0.268531	0.122334	0.459939	down	no
4144	MSTRG.2319.1	1	258	MSTRG.2319	.	3.46512	0.699964	10.3295	1.28231	4.68217	0.769624	7.02326	1.04808	11.6279	1.29252	10.4651	1.37569	0.832254	-0.264904	0.153514	0.515827	down	no
4154	MSTRG.2326.1	1	1812	MSTRG.2326	ENSSSCG00000005201	0	0	0	0	0	0	9.52042	1.42073	0	0	0	0	0.82463	-0.27818	0.122334	0.459939	down	no
4155	MSTRG.2327.1	1	277	MSTRG.2327	ENSSSCG00000005201	6.47653	1.30828	0	0	12.5379	2.0609	0	0	0	0	0	0	1.97765	0.983788	0.171774	0.542894	up	no
4156	MSTRG.2328.1	1	213	MSTRG.2328	ENSSSCG00000005201	0	0	0	0	0	0	9.92488	1.48109	0	0	0	0	0.820213	-0.28593	0.122334	0.459939	down	no
4178	MSTRG.2333.1	1	265	MSTRG.2333	CD274	0	0	0	0	0	0	9.04906	1.35039	0	0	0	0	0.829951	-0.268902	0.122334	0.459939	down	no
4187	MSTRG.2343.1	1	281	MSTRG.2343	.	0	0	0	0	0	0	13.2989	1.98459	0	0	0	0	0.787816	-0.344069	0.122334	0.459939	down	no
4188	MSTRG.2344.1	1	496	MSTRG.2344	.	0	0	0	0	0	0	14.004	2.08982	0	0	0	0	0.781885	-0.354971	0.122334	0.459939	down	no
4189	MSTRG.2345.1	1	339	MSTRG.2345	.	3.09734	0.625673	0	0	0	0	0	0	13.2743	1.47553	0	0	0.823139	-0.280793	0.626717	0.812449	down	no
4190	MSTRG.2338.1	1	315	MSTRG.2338	.	7.14286	1.44288	0	0	9.10794	1.4971	2.87619	0.429213	7.14286	0.793977	1.90476	0.25039	1.26218	0.335914	0.573541	0.77912	up	no
4194	MSTRG.2341.1	1	364	MSTRG.2341	.	0	0	0	0	0.82967	0.136376	10.6731	1.59274	0	0	0	0	0.850635	-0.233388	0.0791212	0.459939	down	no
4205	MSTRG.2352.1	1	302	MSTRG.2352	.	0	0	0	0	9	1.47936	0	0	0	0	0	0	1.3866	0.471547	0.414641	0.718646	up	no
4206	MSTRG.2353.1	3	8012	MSTRG.2353	ENSSSCG00000030006	6.32341	1.27735	17.0357	2.11484	11.8807	1.95287	20.9715	3.12957	18.493	2.05563	15.2196	2.00069	0.849417	-0.235455	0.276452	0.658203	down	no
4211	MSTRG.2358.1	1	4709	MSTRG.2358	.	0	0	14.2716	1.7717	1.45105	0.238514	2.7171	0.405472	0	0	8.62837	1.13424	1.02085	0.0297743	0.965425	0.985159	up	no
4213	MSTRG.2360.1	1	2447	MSTRG.2360	.	0	0	0	0	0	0	10.586	1.57975	0	0	0	0	0.813266	-0.2982	0.122334	0.459939	down	no
4215	MSTRG.2362.1	1	328	MSTRG.2362	.	0	0	0	0	8.67988	1.42674	0	0	0	0	0	0	1.37593	0.460406	0.414641	0.718646	up	no
4216	MSTRG.2355.1	1	1690	MSTRG.2355	.	0	0	0	0	0	0	9.71479	1.44973	0	0	0	0	0.822491	-0.281928	0.122334	0.459939	down	no
4217	MSTRG.2363.1	1	532	MSTRG.2363	.	0	0	0	0	9.07143	1.4911	0	0	12.2068	1.35686	4.48872	0.590064	0.827792	-0.27266	0.687648	0.84825	down	no
4218	MSTRG.2364.1	1	425	MSTRG.2364	.	7.41176	1.4972	0	0	0	0	0	0	0	0	0	0	1.35726	0.440697	0.456053	0.719252	up	no
4220	MSTRG.2366.1	1	2178	MSTRG.2366	.	3.55647	0.718419	10.7984	1.34053	0	0	6.72498	1.00357	0	0	0	0	1.33586	0.417764	0.470533	0.719908	up	no
4223	MSTRG.2368.1	1	1504	MSTRG.2368	.	0	0	9.23537	1.14649	0	0	0	0	0	0	0	0	1.26355	0.337481	0.480118	0.719908	up	no
4224	MSTRG.2369.1	1	714	MSTRG.2369	.	0	0	11.5028	1.42797	0	0	0	0	0	0	6.44678	0.847461	1.03391	0.0481125	0.935092	0.972315	up	no
4227	MSTRG.2372.1	1	8448	MSTRG.2372	.	4.31954	0.87256	11.0257	1.36875	0	0	9.34807	1.39501	0	0	0	0	1.32709	0.408271	0.508897	0.73866	up	no
4228	MSTRG.2373.1	1	442	MSTRG.2373	.	0	0	0	0	0	0	0	0	4.41176	0.490397	0	0	0.854634	-0.226621	0.327684	0.690493	down	no
4229	MSTRG.2377.1	1	2792	MSTRG.2377	.	4.95983	1.0019	7.80473	0.96889	2.16194	0.355365	0	0	3.6327	0.403799	7.73424	1.0167	1.15344	0.205942	0.454808	0.719252	up	no
4231	MSTRG.2379.1	1	3986	MSTRG.2379	.	0	0	0	0	0	0	11.3023	1.68664	0	0	8.12694	1.06833	0.607923	-0.718039	0.138532	0.490147	down	no
4232	MSTRG.2380.1	1	5135	MSTRG.2380	.	0	0	12.6793	1.57402	0	0	11.777	1.75748	0	0	9.47234	1.24519	0.782165	-0.354455	0.653733	0.828356	down	no
4235	MSTRG.2375.1	1	801	MSTRG.2375	.	4.49188	0.907374	13.2797	1.64856	4.4844	0.737115	8.93633	1.33356	7.38577	0.820978	5.77154	0.758696	1.07535	0.104812	0.7008	0.855531	up	no
4236	MSTRG.2376.1	1	907	MSTRG.2376	.	5.93274	1.19843	10.6295	1.31957	5.92282	0.973554	10.7007	1.59686	11.2056	1.24558	0	0	1.26965	0.344433	0.483628	0.721773	up	no
4237	MSTRG.2382.1	1	1306	MSTRG.2382	.	0	0	10.0965	1.25339	0	0	0	0	0	0	0	0	1.2825	0.358954	0.480118	0.719908	up	no
4238	MSTRG.2383.1	1	261	MSTRG.2383	.	0	0	0	0	8.67816	1.42646	0	0	0	0	0	0	1.37587	0.460346	0.414641	0.718646	up	no
4239	MSTRG.2384.1	1	582	MSTRG.2384	.	0	0	11.0825	1.3758	5.189	0.852934	0	0	0	0	0	0	1.62747	0.702628	0.203941	0.580417	up	no
4240	MSTRG.2385.1	1	1635	MSTRG.2385	.	4.0104	0.810112	10.9413	1.35827	0	0	5.59939	0.835595	0	0	0	0	1.38865	0.473683	0.415239	0.719036	up	no
4241	MSTRG.2386.1	1	515	MSTRG.2386	.	3.77864	0.763297	0	0	0	0	15.0291	2.24279	6.30097	0.700395	0	0	0.75863	-0.398532	0.431352	0.719252	down	no
4243	MSTRG.2388.1	1	3856	MSTRG.2388	.	4.03994	0.81608	0	0	0	0	9.99974	1.49226	0	0	0	0	0.999991	-1.35752e-05	0.999972	0.999972	down	no
4245	MSTRG.2390.1	1	222	MSTRG.2390	.	0	0	0	0	0	0	13.5495	2.02199	0	0	0	0	0.78568	-0.347987	0.122334	0.459939	down	no
4246	MSTRG.2391.1	1	267	MSTRG.2391	.	0	0	0	0	0	0	13.573	2.0255	0	0	0	0	0.785481	-0.348352	0.122334	0.459939	down	no
4247	MSTRG.2392.1	1	1088	MSTRG.2392	.	0	0	0	0	0	0	10.6581	1.5905	0	0	0	0	0.812529	-0.299509	0.122334	0.459939	down	no
4248	MSTRG.2393.1	1	785	MSTRG.2393	.	0	0	1.97452	0.24512	0	0	1.38042	0.205999	0	0	0	0	1.02664	0.0379236	0.810466	0.914621	up	no
4249	MSTRG.2394.1	1	264	MSTRG.2394	.	0	0	0	0	1.14394	0.188033	9.15151	1.36568	0	0	0	0	0.881808	-0.181463	0.0777818	0.459939	down	no
4250	MSTRG.2395.1	1	828	MSTRG.2395	.	0	0	0	0	2.73551	0.449645	10.942	1.63288	4.71014	0.523564	0	0	0.784095	-0.3509	0.255962	0.636873	down	no
4254	MSTRG.2398.1	1	213	MSTRG.2398	.	0	0	0	0	0	0	11.1549	1.66465	5.6338	0.626235	9.85915	1.29603	0.482931	-1.05011	0.00861629	0.231086	down	yes
4255	MSTRG.2399.1	1	338	MSTRG.2399	.	0	0	0	0	8.32249	1.368	4.43195	0.661379	0	0	0	0	1.2209	0.287944	0.535569	0.755372	up	no
4259	MSTRG.2404.1	1	284	MSTRG.2404	ENSSSCG00000025229	1.05634	0.213383	0	0	3.17958	0.522638	11.6972	1.74557	0	0	11.6197	1.52747	0.694634	-0.525675	0.335434	0.690493	down	no
4260	MSTRG.2405.1	1	235	MSTRG.2405	ENSSSCG00000025229	0	0	0	0	2.77872	0.456748	11.566	1.72598	1.00851	0.112103	1.06808	0.140405	0.838504	-0.25411	0.12081	0.459939	down	no
4264	MSTRG.2407.1	1	453	MSTRG.2407	.	0	0	1.98676	0.246639	0	0	10.6402	1.58783	1.65563	0.184034	0	0	0.813537	-0.29772	0.331305	0.690493	down	no
4266	MSTRG.2409.1	1	421	MSTRG.2409	.	6.05701	1.22353	0	0	10.4014	1.70972	5.73872	0.856387	0	0	0	0	1.63335	0.70783	0.186783	0.563163	up	no
4271	MSTRG.2410.1	1	239	MSTRG.2410	.	2.47699	0.500359	16.8201	2.08807	3.159	0.519255	0	0	0	0	2.38494	0.313512	1.69113	0.757986	0.154891	0.518606	up	no
4294	MSTRG.2421.1	1	239	MSTRG.2421	ENSSSCG00000005235	0	0	0	0	0	0	10.1088	1.50853	0	0	0	0	0.818247	-0.289391	0.122334	0.459939	down	no
4295	MSTRG.2422.1	1	292	MSTRG.2422	.	8.68151	1.75369	0	0	0	0	0	0	0	0	0	0	1.40228	0.48778	0.456053	0.719252	up	no
4296	MSTRG.2419.1	1	227	MSTRG.2419	.	6.47577	1.30812	16.5066	2.04915	15.3304	2.51991	5.45815	0.814518	16.815	1.8691	20.1013	2.64242	1.02725	0.038792	0.897857	0.955666	up	no
4311	MSTRG.2428.2	2	699	MSTRG.2428	FXN	0.643777	0.130045	1.50215	0.186479	1.85136	0.304314	11.9771	1.78734	0	0	2.18312	0.286982	0.875707	-0.19148	0.294798	0.676296	down	no
4314	MSTRG.2430.1	1	332	MSTRG.2430	TJP2	9.48795	1.9166	0	0	11.3705	1.86901	0	0	0	0	0	0	2.08899	1.06281	0.166276	0.536327	up	no
4315	MSTRG.2431.1	1	281	MSTRG.2431	TJP2	3.73665	0.754816	12.2776	1.52416	0	0	4.29893	0.641528	0	0	3.20285	0.42103	1.25451	0.327122	0.570998	0.777619	up	no
4323	MSTRG.2426.1	1	305	MSTRG.2426	.	5.40984	1.0928	2.95082	0.366319	8.41639	1.38343	0	0	4.42623	0.492005	0.983607	0.1293	1.56834	0.649238	0.152048	0.513208	up	no
4330	MSTRG.2427.1	1	2434	MSTRG.2427	.	9.16064	1.85048	15.8394	1.96632	11.5403	1.89691	18.3392	2.73674	12.7482	1.41704	10.5201	1.38292	1.09796	0.134828	0.186437	0.563163	up	no
4331	MSTRG.2433.1	1	4912	MSTRG.2433	.	13.5887	2.74495	22.259	2.76326	16.5396	2.71867	23.8926	3.56548	19.3441	2.15022	18.6439	2.45084	1.05715	0.0801843	0.315114	0.690493	up	no
4344	MSTRG.2441.1	1	233	MSTRG.2441	.	0	0	0	0	0	0	15.4592	2.30697	0	0	1.93133	0.253883	0.705604	-0.503068	0.0726719	0.459939	down	no
4348	MSTRG.2443.1	1	608	MSTRG.2443	.	7.15461	1.44525	0	0	9.08717	1.49369	0	0	0	0	0	0	1.87269	0.905114	0.165796	0.535957	up	no
4352	MSTRG.2446.1	1	202	MSTRG.2446	ABHD17B	0	0	0	0	9.71782	1.59735	0	0	0	0	0	0	1.41	0.495691	0.414641	0.718646	up	no
4353	MSTRG.2447.1	1	339	MSTRG.2447	ABHD17B	0	0	0	0	0	0	13.8083	2.0606	0	0	0	0	0.783507	-0.351982	0.122334	0.459939	down	no
4355	MSTRG.2449.1	1	260	MSTRG.2449	.	2.30769	0.466161	15.5154	1.9261	0	0	0	0	0	0	0	0	1.57859	0.658636	0.290008	0.671968	up	no
4359	MSTRG.2452.1	1	213	MSTRG.2452	TMC1	0	0	5.6338	0.699389	0	0	0	0	13.3803	1.48731	5.6338	0.740591	0.662673	-0.593631	0.108125	0.459939	down	no
4366	MSTRG.2455.1	1	231	MSTRG.2455	.	246.201	49.7334	364.658	45.2692	263.37	43.291	395.909	59.0814	340.299	37.8265	231.801	30.4714	1.19328	0.254934	0.212862	0.588943	up	no
4379	MSTRG.2461.1	1	475	MSTRG.2461	.	0	0	11.3263	1.40607	0	0	0	0	10.9596	1.21823	0	0	0.956248	-0.0645436	0.917895	0.964472	down	no
4380	MSTRG.2462.1	1	1894	MSTRG.2462	.	0	0	0	0	5.33685	0.877237	9.92978	1.48182	0	0	0	0	1.02886	0.0410483	0.876964	0.946156	up	no
4381	MSTRG.2463.1	1	1248	MSTRG.2463	.	0	0	0	0	0	0	11.7155	1.74831	5.1248	0.569656	0	0	0.671676	-0.574163	0.112882	0.459939	down	no
4382	MSTRG.2464.1	1	410	MSTRG.2464	.	0	0	8.41463	1.04461	2.20976	0.363225	0	0	8.38049	0.931548	14.1951	1.86602	0.713642	-0.486728	0.26888	0.650305	down	no
4383	MSTRG.2465.1	1	647	MSTRG.2465	.	0	0	2.78207	0.34537	0	0	10.2689	1.53243	0	0	0	0	0.894219	-0.161299	0.616128	0.806975	down	no
4387	MSTRG.2471.1	1	612	MSTRG.2471	.	3.14052	0.634395	0	0	2.22059	0.365006	9.37582	1.39915	1.82026	0.202334	3.92157	0.515509	0.861715	-0.214718	0.407938	0.718646	down	no
4388	MSTRG.2472.1	1	546	MSTRG.2472	.	0	0	0	0	0	0	9.64286	1.439	0	0	0	0	0.823279	-0.280547	0.122334	0.459939	down	no
4389	MSTRG.2473.1	1	1413	MSTRG.2473	.	0	0	0	0	8.89243	1.46168	0	0	0	0	0	0	1.38303	0.46783	0.414641	0.718646	up	no
4390	MSTRG.2474.1	1	1386	MSTRG.2474	.	0	0	0	0	0	0	10.8716	1.62236	0	0	0	0	0.810366	-0.303355	0.122334	0.459939	down	no
4391	MSTRG.2475.1	1	1388	MSTRG.2475	.	0	0	0	0	0	0	10.0086	1.49359	0	0	0	0	0.819314	-0.287511	0.122334	0.459939	down	no
4395	MSTRG.2479.1	1	430	MSTRG.2479	.	5.93023	1.19792	0	0	0	0	8.42791	1.25769	0	0	0	0	1.08899	0.122984	0.805929	0.912527	up	no
4396	MSTRG.2480.1	1	870	MSTRG.2480	.	0	0	0	0	0	0	11.2747	1.68252	0	0	0	0	0.806367	-0.310492	0.122334	0.459939	down	no
4398	MSTRG.2482.1	1	952	MSTRG.2482	.	5.25	1.06052	0	0	5.39286	0.886442	9.52101	1.42082	11.0252	1.22553	0	0	0.962749	-0.0547691	0.921798	0.966221	down	no
4399	MSTRG.2483.1	2	619	MSTRG.2483	.	6.71325	1.3561	2.0827	0.25855	2.70873	0.445243	1.51018	0.225364	3.17834	0.353294	3.6637	0.481611	1.18886	0.249577	0.504197	0.73523	up	no
4415	MSTRG.2486.1	1	598	MSTRG.2486	.	0	0	0	0	0	0	10.1003	1.50727	0	0	0	0	0.818337	-0.289233	0.122334	0.459939	down	no
4416	MSTRG.2487.1	1	403	MSTRG.2487	.	2.15385	0.435083	0	0	0	0	0	0	0	0	0	0	1.12814	0.173946	0.456053	0.719252	up	no
4417	MSTRG.2491.1	1	213	MSTRG.2491	.	0	0	0	0	0	0	9.21596	1.37529	0	0	0	0	0.828045	-0.272218	0.122334	0.459939	down	no
4418	MSTRG.2490.1	1	259	MSTRG.2490	.	0	0	0	0	9.13514	1.50157	0	0	0	0	0	0	1.39105	0.476178	0.414641	0.718646	up	no
4419	MSTRG.2492.1	1	694	MSTRG.2492	.	0	0	0	0	1.30547	0.214585	9.72767	1.45166	0	0	0	0	0.881959	-0.181217	0.0827148	0.459939	down	no
4420	MSTRG.2493.1	1	553	MSTRG.2493	.	0	0	0	0	1.63834	0.269299	13.1067	1.95591	5.29837	0.58895	0	0	0.716891	-0.480174	0.14959	0.509313	down	no
4421	MSTRG.2494.1	1	503	MSTRG.2494	.	0	0	0	0	0	0	11.1074	1.65755	0	0	0	0	0.808013	-0.307549	0.122334	0.459939	down	no
4422	MSTRG.2495.1	1	760	MSTRG.2495	.	4.13684	0.835655	0	0	0	0	12.6921	1.89404	0	0	8.39605	1.1037	0.727771	-0.458444	0.428087	0.719252	down	no
4423	MSTRG.2496.1	1	465	MSTRG.2496	.	3.87097	0.781947	14.6409	1.81754	0	0	0	0	0	0	4.75269	0.624764	1.37936	0.463999	0.434606	0.719252	up	no
4424	MSTRG.2497.1	1	393	MSTRG.2497	.	0	0	11.0433	1.37093	0	0	14.9847	2.23617	0	0	0	0	1.00827	0.0118853	0.986121	0.994296	up	no
4425	MSTRG.2498.1	1	438	MSTRG.2498	.	0	0	0	0	2.41324	0.396673	12.5913	1.879	0	0	0	0	0.895502	-0.159232	0.202459	0.578504	down	no
4426	MSTRG.2499.1	1	475	MSTRG.2499	.	0.315789	0.06379	0	0	0	0	0	0	1.17321	0.13041	13.8653	1.82266	0.650191	-0.621065	0.273503	0.655019	down	no
4431	MSTRG.2503.1	1	284	MSTRG.2503	CEP78	0	0	0	0	0	0	9.57042	1.42819	0	0	0	0	0.824077	-0.279149	0.122334	0.459939	down	no
4434	MSTRG.2510.1	1	490	MSTRG.2510	.	9.02041	1.82215	0	0	13.149	2.16134	29.0469	4.33466	0	0	0	0	1.48507	0.570534	0.243316	0.622511	up	no
4438	MSTRG.2512.1	1	511	MSTRG.2512	TLE4	0.587084	0.118593	0	0	0	0	10.9335	1.6316	0	0	0	0	0.840609	-0.250494	0.204785	0.581047	down	no
4439	MSTRG.2513.1	1	352	MSTRG.2513	TLE4	0	0	3.82386	0.4747	2.13352	0.350694	0	0	0	0	11.8892	1.56289	0.870909	-0.199406	0.719789	0.8658	down	no
4440	MSTRG.2514.1	1	644	MSTRG.2514	TLE4	0	0	0	0	1.40683	0.231246	9.97826	1.48905	0	0	0	0	0.883373	-0.178905	0.087867	0.459939	down	no
4441	MSTRG.2515.1	1	617	MSTRG.2515	TLE4	0	0	0	0	0	0	10.7585	1.60549	5.10535	0.567494	0	0	0.679908	-0.556588	0.11594	0.459939	down	no
4444	MSTRG.2505.1	1	292	MSTRG.2505	.	8.73288	1.76407	7.17123	0.890248	10.9521	1.80023	36.1575	5.39578	38.7431	4.30656	25.1438	3.30528	0.485066	-1.04375	0.0148674	0.279012	down	yes
4446	MSTRG.2507.1	1	735	MSTRG.2507	.	0	0	0	0	1.82313	0.299674	10.8884	1.62488	0	0	0	0	0.890363	-0.167535	0.125538	0.46586	down	no
4447	MSTRG.2508.1	1	367	MSTRG.2508	.	10.218	2.06406	0	0	4.11444	0.676305	0	0	0	0	0	0	1.75016	0.807487	0.233991	0.612693	up	no
4448	MSTRG.2509.1	1	435	MSTRG.2509	.	0	0	0	0	8.67816	1.42646	11.0345	1.64667	0	0	0	0	1.11272	0.154087	0.708032	0.859539	up	no
4449	MSTRG.2519.1	1	547	MSTRG.2519	.	6.80439	1.37451	0	0	0	0	4.96892	0.74151	10.6892	1.18818	6.38618	0.839494	0.685759	-0.544225	0.352342	0.69646	down	no
4450	MSTRG.2520.1	1	350	MSTRG.2520	.	0	0	0	0	0	0	10.2914	1.53579	0	0	0	0	0.816321	-0.292792	0.122334	0.459939	down	no
4451	MSTRG.2517.1	1	279	MSTRG.2517	.	8.58781	1.73476	18.4946	2.29595	13.5018	2.21934	5.95341	0.888424	12.9032	1.43428	15.0538	1.97889	1.23278	0.30191	0.134785	0.483616	up	no
4454	MSTRG.2522.1	1	287	MSTRG.2522	.	0.522648	0.105576	0	0	0	0	9.99652	1.49178	0	0	0	0	0.847361	-0.238951	0.198403	0.574068	down	no
4455	MSTRG.2523.1	1	716	MSTRG.2523	.	0	0	0	0	0	0	10.3087	1.53836	0	0	0	0	0.816141	-0.293111	0.122334	0.459939	down	no
4456	MSTRG.2524.1	1	323	MSTRG.2524	.	0	0	0	0	0	0	12.6223	1.88362	0	0	3.71517	0.488377	0.680189	-0.555992	0.0868638	0.459939	down	no
4457	MSTRG.2525.1	1	362	MSTRG.2525	.	0	0	0	0	8.34254	1.37129	0	0	0	0	0	0	1.36453	0.448403	0.414641	0.718646	up	no
4458	MSTRG.2526.1	1	405	MSTRG.2526	.	0	0	0	0	2.56543	0.421689	9.59012	1.43113	3.33333	0.370522	0	0	0.825987	-0.275809	0.266555	0.647573	down	no
4460	MSTRG.2527.1	1	246	MSTRG.2527	.	0	0	0	0	0	0	11.0488	1.64881	0	0	0	0	0.808594	-0.306512	0.122334	0.459939	down	no
4461	MSTRG.2528.1	1	514	MSTRG.2528	.	4.0856	0.825304	12.1732	1.51119	0	0	0	0	0	0	4.66926	0.613797	1.34585	0.428513	0.431656	0.719252	up	no
4463	MSTRG.2530.1	1	572	MSTRG.2530	.	0	0	1.62402	0.201608	0	0	10.5594	1.57578	0	0	0	0	0.860609	-0.21657	0.419471	0.719252	down	no
4466	MSTRG.2531.1	1	242	MSTRG.2531	.	0	0	0	0	9.3595	1.53845	0	0	2.47934	0.275595	0	0	1.27063	0.345542	0.568462	0.77605	up	no
4467	MSTRG.2532.1	1	274	MSTRG.2532	.	2.18978	0.442342	0	0	9.91971	1.63054	0	0	0	0	0	0	1.60065	0.678659	0.23748	0.61583	up	no
4468	MSTRG.2533.1	1	244	MSTRG.2533	.	1.93989	0.391864	9.50902	1.18046	4.22882	0.695106	9.90164	1.47762	17.9235	1.99232	6.9235	0.910128	0.710677	-0.492735	0.210837	0.586908	down	no
4477	MSTRG.2536.1	1	247	MSTRG.2536	.	6.68016	1.34941	0	0	0	0	0	0	6.07287	0.675041	0	0	1.08551	0.11837	0.841664	0.930452	up	no
4525	MSTRG.2550.1	1	227	MSTRG.2550	NPR2	86.7401	17.5218	164.7	20.4462	134.436	22.0977	81.5683	12.1724	195.352	21.7147	141.291	18.5734	1.10179	0.13985	0.447571	0.719252	up	no
4558	MSTRG.2563.1	1	242	MSTRG.2563	.	0	0	0	0	1.24793	0.205127	13.8636	2.06887	0	0	0	0	0.837446	-0.255932	0.075204	0.459939	down	no
4560	MSTRG.2568.1	1	395	MSTRG.2568	.	2.27848	0.46026	0	0	2.7038	0.444433	9.93924	1.48323	0	0	0	0	1.06222	0.0870835	0.507039	0.737115	up	no
4564	MSTRG.2567.1	1	233	MSTRG.2567	.	0	0	0	0	0	0	9.07296	1.35396	0	0	0	0	0.829677	-0.269379	0.122334	0.459939	down	no
4574	MSTRG.2575.1	1	632	MSTRG.2575	ENSSSCG00000005350	9.33228	1.88515	0	0	4.96361	0.815885	3.5443	0.528915	0	0	0	0	1.60933	0.68646	0.24897	0.628922	up	no
4575	MSTRG.2576.1	1	291	MSTRG.2576	ENSSSCG00000005350	5.15464	1.04125	11.2646	1.3984	0	0	10.378	1.54871	0	0	0	0	1.3526	0.435733	0.50106	0.733189	up	no
4581	MSTRG.2582.1	1	352	MSTRG.2582	.	0	0	0	0	0	0	10.7244	1.6004	0.852273	0.094736	0	0	0.783436	-0.352113	0.0937733	0.459939	down	no
4582	MSTRG.2579.1	1	3469	MSTRG.2579	.	25.9138	5.23467	38.1496	4.73595	28.9974	4.7664	56.8807	8.48828	53.7705	5.97696	41.9421	5.51349	0.813432	-0.297907	0.0293983	0.361919	down	no
4586	MSTRG.2586.1	1	746	MSTRG.2586	ENSSSCG00000005358	0	0	0	0	0	0	8.2319	1.22844	0	0	0	0	0.839651	-0.252138	0.122334	0.459939	down	no
4587	MSTRG.2583.1	1	342	MSTRG.2583	.	0	0	0	0	0	0	7.50585	1.1201	0	0	0	0	0.848829	-0.236454	0.122334	0.459939	down	no
4590	MSTRG.2589.1	1	433	MSTRG.2589	.	2.07852	0.419868	0	0	0	0	9.06697	1.35306	0	0	4.50346	0.592002	0.778679	-0.360899	0.325258	0.690493	down	no
4598	MSTRG.2593.1	1	221	MSTRG.2593	TDRD7	0	0	0	0	0	0	10.2489	1.52944	0	0	0	0	0.816768	-0.292003	0.122334	0.459939	down	no
4599	MSTRG.2594.1	1	467	MSTRG.2594	TDRD7	0.955839	0.193082	3.35764	0.416823	0	0	9.70021	1.44756	0	0	0	0	0.970838	-0.0426976	0.894391	0.95406	down	no
4649	MSTRG.2617.1	1	289	MSTRG.2617	TGFBR1	8.3045	1.67753	0	0	0	0	0	0	0	0	2.07613	0.272917	1.26498	0.33911	0.593056	0.792595	up	no
4650	MSTRG.2618.1	1	253	MSTRG.2618	TGFBR1	0	0	0	0	0	0	15.5178	2.31571	1.18577	0.131806	0	0	0.733318	-0.447489	0.0925739	0.459939	down	no
4651	MSTRG.2615.1	1	801	MSTRG.2615	.	0	0	0	0	10.5943	1.74141	0	0	0	0	0	0	1.43766	0.523725	0.414641	0.718646	up	no
4660	MSTRG.2626.1	1	1380	MSTRG.2626	INVS	4.77826	0.965223	5.50942	0.683948	6.09058	1.00113	7.18406	1.07207	0	0	0	0	1.60949	0.686605	0.000657036	0.112611	up	no
4661	MSTRG.2627.1	1	218	MSTRG.2627	INVS	0	0	0	0	0	0	9.69725	1.44712	0	0	0	0	0.822683	-0.281592	0.122334	0.459939	down	no
4662	MSTRG.2628.1	1	813	MSTRG.2628	INVS	0	0	0	0	0	0	8.7294	1.30269	0	0	0	0	0.833671	-0.26245	0.122334	0.459939	down	no
4663	MSTRG.2629.1	1	326	MSTRG.2629	INVS	0	0	0	0	0.917178	0.15076	14.8221	2.21189	0	0	0	0	0.815502	-0.294239	0.082105	0.459939	down	no
4664	MSTRG.2630.1	1	309	MSTRG.2630	INVS	0.485437	0.09806	0.485437	0.060263	0.977346	0.16065	9.77346	1.45849	0.970874	0.107919	0	0	0.874795	-0.192983	0.157951	0.523393	down	no
4666	MSTRG.2632.1	1	222	MSTRG.2632	INVS	0	0	1.41787	0.176016	0.831926	0.136747	9.52252	1.42104	1.72386	0.191618	0	0	0.846988	-0.239587	0.284593	0.666626	down	no
4710	MSTRG.2640.1	1	361	MSTRG.2640	NIPSNAP3B	0	0	12.8643	1.59699	0	0	2.50969	0.374521	1.66205	0.184748	3.31579	0.435877	1.01582	0.0226435	0.969168	0.986872	up	no
4713	MSTRG.2641.3	2	1348	MSTRG.2641	NIPSNAP3B	5.51706	1.11446	5.33049	0.661736	9.48961	1.55984	13.2322	1.97463	1.79767	0.199823	11.1158	1.46123	1.08835	0.122148	0.758961	0.887633	up	no
4734	MSTRG.2644.1	1	288	MSTRG.2644	.	0	0	0	0	8.38889	1.37891	3.14583	0.469451	0	0	0	0	1.25611	0.328959	0.499622	0.732386	up	no
4735	MSTRG.2645.1	1	690	MSTRG.2645	.	5.42319	1.0955	0	0	0	0	1.96957	0.293917	0	0	0	0	1.21013	0.275165	0.557827	0.769659	up	no
4737	MSTRG.2646.1	1	249	MSTRG.2646	.	4.58634	0.926456	22	2.73111	8.7992	1.44635	2.4257	0.361987	16.8112	1.86868	9.61044	1.26334	1.15576	0.20884	0.52844	0.750483	up	no
4744	MSTRG.2649.1	1	292	MSTRG.2649	.	0	0	1.0274	0.127543	0	0	9.30822	1.38906	0	0	0	0	0.85797	-0.221	0.324819	0.690493	down	no
4747	MSTRG.2650.1	1	234	MSTRG.2650	.	5.09402	1.02901	11.5214	1.43028	12.8376	2.11016	12.8889	1.9234	14.5043	1.61225	7.48718	0.984226	1.03932	0.0556443	0.82798	0.923673	up	no
4755	MSTRG.2661.1	1	341	MSTRG.2661	.	0	0	0	0	11.3372	1.86354	0	0	0	0	0	0	1.4604	0.54636	0.414641	0.718646	up	no
4756	MSTRG.2662.1	1	409	MSTRG.2662	.	0	0	0	0	0	0	12.1834	1.81812	0	0	0	0	0.79774	-0.326009	0.122334	0.459939	down	no
4757	MSTRG.2663.1	1	342	MSTRG.2663	.	0	0	0	0	0	0	10.155	1.51542	0	0	0	0	0.817758	-0.290255	0.122334	0.459939	down	no
4761	MSTRG.2656.1	1	249	MSTRG.2656	ENSSSCG00000026467	0	0	0	0	2.18474	0.359113	14.5542	2.17192	0	0	0	0	0.868214	-0.203878	0.118579	0.459939	down	no
4765	MSTRG.2665.1	1	372	MSTRG.2665	.	0	0	0	0	0	0	10.6425	1.58817	0	0	0	0	0.812688	-0.299226	0.122334	0.459939	down	no
4794	MSTRG.2678.1	1	1700	MSTRG.2678	.	6.35059	1.28284	0	0	6.18118	1.01602	11.4565	1.70965	0	0	10.1812	1.33837	0.98087	-0.0278659	0.962334	0.983597	down	no
4795	MSTRG.2679.1	1	1843	MSTRG.2679	.	0	0	0	0	0	0	10.6918	1.59553	0	0	6.82597	0.897308	0.633386	-0.658843	0.129733	0.4751	down	no
4796	MSTRG.2680.1	1	1372	MSTRG.2680	.	5.99125	1.21025	0	0	7.03499	1.15637	12.0999	1.80566	10.5423	1.17185	0	0	1.01109	0.0159051	0.977782	0.990497	up	no
4799	MSTRG.2683.1	1	1240	MSTRG.2683	.	0	0	0	0	0	0	9.85645	1.47087	0	0	0	0	0.820951	-0.284632	0.122334	0.459939	down	no
4800	MSTRG.2684.1	1	314	MSTRG.2684	.	0	0	0	0	0	0	10.0987	1.50703	0	0	0	0	0.818354	-0.289203	0.122334	0.459939	down	no
4802	MSTRG.2686.1	1	394	MSTRG.2686	.	0	0	0	0	11.1142	1.82688	5.36548	0.800689	0	0	0	0	1.27863	0.354595	0.52956	0.751145	up	no
4822	MSTRG.2691.1	1	581	MSTRG.2691	.	0	0	0	0	0	0	11.8744	1.77201	0	0	0	0	0.800616	-0.320818	0.122334	0.459939	down	no
4826	MSTRG.2699.1	1	1290	MSTRG.2699	.	0	0	0	0	0	0	10.1907	1.52075	0	0	0	0	0.81738	-0.290921	0.122334	0.459939	down	no
4827	MSTRG.2692.1	1	1391	MSTRG.2692	.	0	0	0	0	8.25018	1.35611	0	0	0	0	0	0	1.36138	0.445067	0.414641	0.718646	up	no
4828	MSTRG.2694.1	1	1129	MSTRG.2694	.	12.4101	2.50688	18.9522	2.35275	17.705	2.91024	16.659	2.48602	20.1656	2.24155	14.0071	1.8413	1.1496	0.201127	0.103372	0.459939	up	no
4833	MSTRG.2700.1	1	525	MSTRG.2700	.	3.42857	0.692582	0	0	0	0	9.20381	1.37348	0	0	0	0	0.987217	-0.0185615	0.957577	0.98133	down	no
4834	MSTRG.2701.1	1	1807	MSTRG.2701	.	6.85999	1.38574	11.2662	1.3986	10.3171	1.69586	13.6533	2.03748	13.7194	1.52501	11.5351	1.51635	0.951166	-0.0722305	0.214734	0.591117	down	no
4843	MSTRG.2703.1	1	270	MSTRG.2703	.	0	0	10.3481	1.28463	10.0667	1.65469	0	0	13.8444	1.5389	0	0	1.26833	0.342926	0.654092	0.828625	up	no
4845	MSTRG.2707.1	1	288	MSTRG.2707	SUSD1	9.34028	1.88677	16.6667	2.06902	15.5347	2.55349	11.0104	1.64308	0	0	16.5069	2.16992	1.63849	0.712367	0.29491	0.676339	up	no
4873	MSTRG.2717.1	1	882	MSTRG.2717	.	23.3492	4.71661	0	0	26.5488	4.36391	46.1145	6.88165	56.051	6.23045	31.9887	4.20507	0.50512	-0.985302	0.365554	0.708614	down	no
4905	MSTRG.2728.1	1	495	MSTRG.2728	.	6.08283	1.22875	0	0	10.1818	1.67362	0	0	0	0	0	0	1.86174	0.896652	0.168118	0.538295	up	no
4913	MSTRG.2739.1	1	293	MSTRG.2739	ENSSSCG00000023894	0	0	0	0	0	0	9.09215	1.35682	0	0	1.02389	0.134595	0.789772	-0.340491	0.0748248	0.459939	down	no
4915	MSTRG.2741.1	1	273	MSTRG.2741	ENSSSCG00000023894	7.47253	1.50947	0	0	3.8718	0.63642	1.10623	0.165082	0.549451	0.061075	3.2967	0.433368	1.33369	0.415427	0.444375	0.719252	up	no
4931	MSTRG.2732.1	1	558	MSTRG.2732	.	0	0	0	0	0	0	13.1846	1.96753	0	0	0	0	0.788802	-0.342265	0.122334	0.459939	down	no
4934	MSTRG.2745.1	1	1920	MSTRG.2745	.	0	0	8.37344	1.03949	6.83594	1.12365	0	0	0	0	10.3792	1.36439	1.16798	0.224011	0.733255	0.873297	up	no
4935	MSTRG.2746.1	1	588	MSTRG.2746	.	0	0	0	0	0	0	10.4575	1.56057	0	0	0	0	0.814591	-0.295852	0.122334	0.459939	down	no
4936	MSTRG.2747.1	1	747	MSTRG.2747	.	5.42169	1.0952	0	0	0	0	12.1285	1.80993	0	0	0	0	1.02178	0.0310815	0.948381	0.977333	up	no
4937	MSTRG.2750.1	1	446	MSTRG.2750	.	0	0	0	0	0	0	14.4417	2.15513	6.21691	0.691051	9.41704	1.23792	0.462938	-1.11111	0.00490157	0.193084	down	yes
4938	MSTRG.2751.1	1	307	MSTRG.2751	.	0	0	2.9316	0.363933	0	0	15.7394	2.34879	0	0	0	0	0.844889	-0.243167	0.521873	0.746476	down	no
4939	MSTRG.2752.1	1	250	MSTRG.2752	.	1.2	0.242404	0	0	2.972	0.488518	14.496	2.16323	0	0	0	0	0.965091	-0.0512638	0.15327	0.515546	down	no
4940	MSTRG.2753.1	1	216	MSTRG.2753	.	0	0	0	0	0	0	9.78704	1.46052	0	0	0	0	0.821704	-0.28331	0.122334	0.459939	down	no
4942	MSTRG.2755.1	1	2574	MSTRG.2755	.	0	0	0	0	7.91103	1.30036	8.31609	1.24101	0	0	2.67832	0.352079	1.00679	0.00976767	0.982186	0.992602	up	no
4943	MSTRG.2748.1	1	231	MSTRG.2748	.	0	0	0	0	18.1861	2.98932	0	0	0	0	0	0	1.64552	0.718547	0.414641	0.718646	up	no
4944	MSTRG.2749.1	1	728	MSTRG.2749	.	6.51648	1.31635	0	0	0	0	9.87912	1.47426	0	0	0	0	1.08631	0.119433	0.823325	0.92122	up	no
4945	MSTRG.2756.1	1	1242	MSTRG.2756	.	6.20612	1.25365	6.83333	0.8483	5.58293	0.917685	12.1417	1.8119	8.63446	0.959778	6.56683	0.863242	0.962477	-0.0551762	0.656627	0.830201	down	no
4946	MSTRG.2757.1	1	252	MSTRG.2757	.	0	0	0	0	14.0238	2.30514	0	0	0	0	7.72619	1.01565	1.1714	0.228228	0.789195	0.904512	up	no
4947	MSTRG.2758.1	1	422	MSTRG.2758	.	0	0	0	0	0	0	0	0	14.218	1.58043	0	0	0.688555	-0.538356	0.327684	0.690493	down	no
4948	MSTRG.2759.1	1	236	MSTRG.2759	.	0	0	0	0	0	0	12.1568	1.81415	0	0	0	0	0.797985	-0.325566	0.122334	0.459939	down	no
4949	MSTRG.2760.1	1	1012	MSTRG.2760	.	0	0	0	0	0	0	10.1433	1.51368	0	0	0	0	0.817881	-0.290036	0.122334	0.459939	down	no
4951	MSTRG.2765.1	1	2475	MSTRG.2765	.	0	0	0	0	0	0	13.0824	1.95229	8.21817	0.913505	0	0	0.611666	-0.709183	0.132847	0.480916	down	no
4952	MSTRG.2766.1	1	1089	MSTRG.2766	.	0	0	10.9596	1.36054	0	0	0	0	0	0	0	0	1.30087	0.379478	0.480118	0.719908	up	no
4953	MSTRG.2767.1	1	669	MSTRG.2767	.	0	0	0	0	9.7287	1.59914	0	0	0	0	0	0	1.41035	0.496048	0.414641	0.718646	up	no
4954	MSTRG.2768.1	1	2489	MSTRG.2768	.	0	0	10.9349	1.35748	8.85257	1.45513	0	0	0	0	0	0	1.7967	0.845351	0.18662	0.563163	up	no
4955	MSTRG.2769.1	1	6049	MSTRG.2769	.	0	0	0	0	0	0	9.28732	1.38594	0	0	0	0	0.827238	-0.273626	0.122334	0.459939	down	no
4956	MSTRG.2770.1	5	1681	MSTRG.2770	.	22.4274	4.5304	1.68755	0.209495	1.98835	0.326832	15.5934	2.32699	0.277757	0.030875	0	0	1.57894	0.658958	0.489862	0.726372	up	no
4957	MSTRG.2770.2	6	1488	MSTRG.2770	.	0	0	0.484641	0.060164	27.0274	4.44258	0.032789	0.004893	0.767193	0.085279	8.63959	1.13572	1.34971	0.432644	0.700936	0.855638	up	no
4958	MSTRG.2770.3	5	1301	MSTRG.2770	.	2.82945	0.571557	8.08981	1.00428	11.1799	1.83767	15.4448	2.30483	21.8808	2.4322	19.812	2.60438	0.60369	-0.728119	0.088951	0.459939	down	no
4959	MSTRG.2770.4	6	698	MSTRG.2770	.	0	0	43.1897	5.36163	0.98104	0.161257	0.294563	0.043958	0	0	13.2848	1.74636	1.24464	0.315725	0.784131	0.902194	up	no
4960	MSTRG.2770.5	6	762	MSTRG.2770	.	0	0	41.0595	5.09719	1.68685	0.277274	0.458379	0.068404	41.0878	4.56718	5.6863	0.747491	0.767012	-0.382678	0.723009	0.867854	down	no
4963	MSTRG.2773.1	1	1127	MSTRG.2773	.	0	0	0	0	0	0	0	0	7.1819	0.798317	0	0	0.79373	-0.33328	0.327684	0.690493	down	no
4964	MSTRG.2774.1	1	327	MSTRG.2774	.	1.83486	0.370648	0	0	10.8257	1.77946	2.57492	0.384255	0	0	0	0	1.49525	0.58039	0.286485	0.669024	up	no
4965	MSTRG.2775.1	1	398	MSTRG.2775	.	7.53769	1.52264	0	0	0	0	0	0	9.12498	1.0143	0	0	1.03375	0.047884	0.943671	0.975639	up	no
4966	MSTRG.2761.1	2	5897	MSTRG.2761	.	0	0	0	0	0	0	43.6157	6.50876	0	0	0	0	0.64422	-0.634375	0.122334	0.459939	down	no
4967	MSTRG.2761.2	2	6101	MSTRG.2761	.	0.279841	0.056529	29.5288	3.66575	10.2089	1.67808	1.26764	0.18917	16.0234	1.7811	31.6999	4.1671	0.79184	-0.336719	0.686328	0.847359	down	no
4968	MSTRG.2762.1	1	352	MSTRG.2762	.	2.55682	0.516485	0	0	5.5767	0.916662	11.429	1.70554	0	0	10.2273	1.34442	0.839702	-0.25205	0.626158	0.812176	down	no
4969	MSTRG.2763.1	1	6309	MSTRG.2763	.	10.214	2.06325	16.8106	2.08689	14.806	2.43371	12.9474	1.93213	12.9964	1.44463	8.9534	1.17697	1.31573	0.395869	0.0115535	0.253472	up	no
5015	MSTRG.2794.1	1	270	MSTRG.2794	.	0	0	0	0	0	0	10.6259	1.5857	0	0	0	0	0.812858	-0.298926	0.122334	0.459939	down	no
5021	MSTRG.2799.1	1	216	MSTRG.2799	.	0	0	0	0	0	0	11.1852	1.66916	4.58333	0.509468	0	0	0.686455	-0.542763	0.109451	0.459939	down	no
5024	MSTRG.2801.1	1	3237	MSTRG.2801	.	0	0	17.9592	2.22948	12.679	2.0841	11.8838	1.77342	0	0	9.26753	1.21826	1.26191	0.335611	0.689139	0.848899	up	no
5028	MSTRG.2805.1	2	456	MSTRG.2805	.	22.3377	4.51229	18.5702	2.30533	24.0154	3.94748	30.7182	4.58406	25.8366	2.87191	18.3048	2.40626	1.13607	0.18405	0.475742	0.719908	up	no
5030	MSTRG.2803.1	1	266	MSTRG.2803	.	8.45865	1.70867	0	0	0	0	0	0	0	0	0	0	1.39459	0.479842	0.456053	0.719252	up	no
5041	MSTRG.2813.1	1	535	MSTRG.2813	.	0	0	0	0	9.17944	1.50886	1.68785	0.251877	0	0	1.12149	0.147426	1.25699	0.329973	0.549254	0.76372	up	no
5042	MSTRG.2814.1	1	298	MSTRG.2814	.	0	0	0	0	0	0	11.6544	1.73918	11.1596	1.24047	0	0	0.584309	-0.775196	0.1566	0.521244	down	no
5048	MSTRG.2817.1	1	252	MSTRG.2817	.	0	0	0	0	0	0	10.5714	1.57757	0	0	0	0	0.813416	-0.297934	0.122334	0.459939	down	no
5054	MSTRG.2821.1	1	279	MSTRG.2821	.	2.68817	0.543019	0	0	8.94265	1.46993	9.74194	1.45379	0	0	0	0	1.31584	0.395987	0.272863	0.654377	up	no
5118	MSTRG.2838.1	1	1720	MSTRG.2838	.	3.31395	0.669429	7.93895	0.985554	0	0	9.06599	1.35291	0	0	5.65	0.74272	0.979062	-0.0305284	0.9548	0.980183	down	no
5119	MSTRG.2830.1	1	719	MSTRG.2830	.	0	0	11.8804	1.47485	8.12796	1.33602	4.33797	0.647353	13.5605	1.50734	11.4131	1.5003	0.783813	-0.351419	0.529126	0.750848	down	no
5124	MSTRG.2834.1	1	3935	MSTRG.2834	.	5.70241	1.1519	8.96366	1.11276	7.22465	1.18754	0	0	14.6287	1.62608	10.8941	1.43208	1.0424	0.0599107	0.723737	0.868314	up	no
5125	MSTRG.2835.1	1	1797	MSTRG.2835	.	0	0	0	0	0	0	14.2788	2.13082	0	0	0	0	0.77964	-0.359119	0.122334	0.459939	down	no
5126	MSTRG.2836.1	1	947	MSTRG.2836	.	6.30003	1.27262	11.3981	1.41498	7.97255	1.31047	10.7656	1.60654	15.2851	1.69904	0	0	1.2785	0.35445	0.529326	0.750971	up	no
5127	MSTRG.2831.1	2	504	MSTRG.2831	.	10.5139	2.12384	14.9663	1.85793	7.50397	1.23345	4.06151	0.606097	14.1964	1.57803	15.7163	2.06598	1.08321	0.115314	0.514991	0.741992	up	no
5133	MSTRG.2842.1	1	547	MSTRG.2842	.	6.58135	1.32945	0	0	0	0	3.03656	0.453145	0	0	0	0	1.22231	0.289615	0.588423	0.789389	up	no
5134	MSTRG.2843.1	1	397	MSTRG.2843	.	6.04534	1.22118	0	0	8.13098	1.33652	0	0	0	0	0	0	1.77156	0.825023	0.165644	0.535957	up	no
5135	MSTRG.2844.1	1	286	MSTRG.2844	.	0	0	0	0	0	0	12.6713	1.89094	0	0	0	0	0.793314	-0.334036	0.122334	0.459939	down	no
5137	MSTRG.2845.1	1	209	MSTRG.2845	.	0	0	0	0	9.95215	1.63587	0	0	2.15311	0.239333	0	0	1.30267	0.381477	0.542376	0.759867	up	no
5138	MSTRG.2846.1	1	913	MSTRG.2846	.	0	0	0	0	0	0	9.75794	1.45617	0	0	3.19058	0.419417	0.717507	-0.478935	0.0887553	0.459939	down	no
5151	MSTRG.2851.1	1	281	MSTRG.2851	.	0	0	0	0	0	0	12.8968	1.92458	0	0	0	0	0.791314	-0.337677	0.122334	0.459939	down	no
5156	MSTRG.2858.1	1	297	MSTRG.2858	.	0	0	11.1111	1.37935	2.54209	0.417852	0	0	1.51515	0.168419	0	0	1.39079	0.475907	0.340122	0.690493	up	no
5157	MSTRG.2859.1	2	4241	MSTRG.2859	.	9.77588	1.97476	12.5607	1.55931	10.4742	1.72168	11.8273	1.76498	17.4602	1.94082	13.373	1.75795	0.972168	-0.040723	0.651695	0.827169	down	no
5158	MSTRG.2868.1	1	222	MSTRG.2868	.	6.72973	1.35943	0	0	0	0	0	0	0	0	1.98083	0.260389	1.21735	0.283745	0.608811	0.802016	up	no
5159	MSTRG.2869.1	1	358	MSTRG.2869	.	0	0	0	0	0	0	10.5307	1.5715	0	0	0	0	0.813835	-0.297192	0.122334	0.459939	down	no
5161	MSTRG.2871.1	1	867	MSTRG.2871	.	0	0	0	0	0	0	10.1015	1.50744	0	0	0	0	0.818325	-0.289255	0.122334	0.459939	down	no
5162	MSTRG.2872.1	1	821	MSTRG.2872	.	0	0	0	0	0	0	9.57978	1.42959	0	0	0	0	0.823974	-0.27933	0.122334	0.459939	down	no
5166	MSTRG.2860.1	1	229	MSTRG.2860	.	0	0	7.86026	0.975785	0	0	7.91266	1.1808	21.6157	2.40273	0	0	0.641746	-0.639925	0.437954	0.719252	down	no
5168	MSTRG.2861.1	1	280	MSTRG.2861	.	8.03571	1.62324	12.3214	1.5296	8.61786	1.41655	4.31429	0.643819	12.8571	1.42916	12.8571	1.69013	1.08518	0.117935	0.231353	0.60997	up	no
5182	MSTRG.2863.1	1	247	MSTRG.2863	NR5A1	0	0	0.607287	0.07539	0	0	9.78138	1.45967	0	0	0	0	0.840262	-0.251089	0.232346	0.611001	down	no
5184	MSTRG.2883.1	1	404	MSTRG.2883	NR6A1	0	0	0	0	1.49505	0.245746	9.71782	1.45019	4.08416	0.453982	0	0	0.7682	-0.380446	0.158721	0.524745	down	no
5185	MSTRG.2884.1	1	258	MSTRG.2884	NR6A1	6.97674	1.40932	0	0	0	0	0	0	0	0	0	0	1.34113	0.423447	0.456053	0.719252	up	no
5186	MSTRG.2885.1	1	665	MSTRG.2885	NR6A1	0	0	0	0	8.58045	1.4104	0	0	0	0	0	0	1.37259	0.456897	0.414641	0.718646	up	no
5187	MSTRG.2886.1	1	1265	MSTRG.2886	NR6A1	0	0	0	0	0	0	7.94387	1.18546	0	0	0	0	0.843226	-0.246009	0.122334	0.459939	down	no
5188	MSTRG.2887.1	1	557	MSTRG.2887	NR6A1	2.1544	0.435195	0	0	0	0	11.386	1.69913	0	0	4.84021	0.63627	0.750401	-0.414266	0.2924	0.673953	down	no
5189	MSTRG.2888.1	1	914	MSTRG.2888	NR6A1	0	0	0	0	0	0	7.59956	1.13408	0	0	1.89278	0.248815	0.777557	-0.36298	0.0774618	0.459939	down	no
5190	MSTRG.2889.1	1	631	MSTRG.2889	NR6A1	0	0	0	0	0	0	8.66244	1.29269	0	0	0	0	0.834462	-0.261081	0.122334	0.459939	down	no
5191	MSTRG.2890.1	1	585	MSTRG.2890	NR6A1	0	0	0	0	0	0	11.3521	1.69407	0	0	0	0	0.805611	-0.311845	0.122334	0.459939	down	no
5192	MSTRG.2891.1	1	556	MSTRG.2891	NR6A1	1.88849	0.381481	0	0	0.814748	0.133923	9.77698	1.45901	0	0	1.34892	0.177322	0.898962	-0.153669	0.435579	0.719252	down	no
5193	MSTRG.2892.1	1	1094	MSTRG.2892	NR6A1	0	0	0	0	0	0	7.75411	1.15714	0	0	0	0	0.845628	-0.241905	0.122334	0.459939	down	no
5195	MSTRG.2894.1	1	663	MSTRG.2894	NR6A1	0	0	0	0	0	0	0	0	0	0	11.0739	1.45572	0.705528	-0.503226	0.344931	0.690493	down	no
5196	MSTRG.2895.1	1	1226	MSTRG.2895	NR6A1	0	0	0	0	0	0	10.4511	1.55961	6.11153	0.679338	0	0	0.664279	-0.590139	0.1267	0.468689	down	no
5197	MSTRG.2896.1	1	2220	MSTRG.2896	NR6A1	0	0	0	0	0	0	11.1928	1.6703	0	0	0	0	0.80717	-0.309055	0.122334	0.459939	down	no
5198	MSTRG.2897.1	1	349	MSTRG.2897	NR6A1	6.81375	1.3764	0	0	0	0	0	0	0	0	0	0	1.33498	0.416821	0.456053	0.719252	up	no
5199	MSTRG.2898.1	1	482	MSTRG.2898	NR6A1	0	0	0	0	0	0	14.1701	2.1146	0	0	0	0	0.780524	-0.357485	0.122334	0.459939	down	no
5200	MSTRG.2899.1	1	1307	MSTRG.2899	NR6A1	6.2785	1.26828	9.75516	1.21102	0	0	0	0	6.05192	0.672712	7.34188	0.965126	1.05293	0.0744086	0.858981	0.938202	up	no
5201	MSTRG.2900.1	1	660	MSTRG.2900	NR6A1	0	0	0	0	0	0	9.35	1.3953	0	0	0	0	0.826532	-0.274857	0.122334	0.459939	down	no
5202	MSTRG.2901.1	1	3230	MSTRG.2901	NR6A1	0	0	0	0	6.13034	1.00767	9.12446	1.36164	0	0	0	0	1.06551	0.0915501	0.768557	0.893198	up	no
5203	MSTRG.2902.1	1	305	MSTRG.2902	NR6A1	6.88525	1.39084	6.39344	0.793692	0	0	0	0	0	0	2.04341	0.268616	1.45863	0.544617	0.29825	0.679727	up	no
5204	MSTRG.2903.1	1	1028	MSTRG.2903	NR6A1	0	0	0	0	3.21595	0.528617	14.9348	2.22872	0	0	0	0	0.902235	-0.148425	0.326435	0.690493	down	no
5205	MSTRG.2904.1	1	1731	MSTRG.2904	ssc-mir-181a-2	0	0	0	0	0	0	11.6667	1.74101	0	0	0	0	0.802582	-0.31728	0.122334	0.459939	down	no
5209	MSTRG.2908.1	1	6459	MSTRG.2908	NR6A1	4.38009	0.884792	7.52098	0.933666	5.12494	0.842404	10.4346	1.55715	8.00743	0.89008	7.11829	0.935733	0.924647	-0.113026	0.184555	0.560475	down	no
5210	MSTRG.2909.1	1	5908	MSTRG.2909	NR6A1	0	0	0	0	0	0	8.45091	1.26113	0	0	0	0	0.836989	-0.256719	0.122334	0.459939	down	no
5211	MSTRG.2910.1	1	4959	MSTRG.2910	NR6A1	6.42065	1.29699	8.94636	1.11061	6.86691	1.12874	0	0	11.6745	1.2977	10.6386	1.3985	1.11758	0.16038	0.339105	0.690493	up	no
5213	MSTRG.2911.1	1	439	MSTRG.2911	NR6A1	0	0	0	0	10.2825	1.69016	0	0	0	0	0	0	1.42793	0.513924	0.414641	0.718646	up	no
5214	MSTRG.2912.1	1	424	MSTRG.2912	NR6A1	0	0	0	0	8.9033	1.46347	0	0	0	0	0	0	1.38339	0.468207	0.414641	0.718646	up	no
5215	MSTRG.2913.1	1	378	MSTRG.2913	NR6A1	0	0	0	0	10.7857	1.77289	0	0	11.5079	1.27918	0	0	1.04376	0.0617964	0.938031	0.972969	up	no
5216	MSTRG.2914.1	1	273	MSTRG.2914	NR6A1	9.13553	1.8454	0	0	0	0	0	0	0	0	0	0	1.4177	0.503557	0.456053	0.719252	up	no
5217	MSTRG.2915.1	1	555	MSTRG.2915	NR6A1	0	0	0	0	0	0	0	0	13.7694	1.53056	6.57117	0.863813	0.544869	-0.876019	0.0163393	0.288377	down	no
5219	MSTRG.2875.1	1	267	MSTRG.2875	OLFML2A	6.74157	1.36182	0	0	0	0	0	0	0	0	0	0	1.33224	0.413857	0.456053	0.719252	up	no
5230	MSTRG.2916.1	1	252	MSTRG.2916	.	0	0	0	0	0	0	0	0	0	0	14.2857	1.87793	0.663381	-0.59209	0.344931	0.690493	down	no
5231	MSTRG.2917.1	1	2781	MSTRG.2917	RABEPK	60.6246	12.2464	0	0	87.1823	14.3305	16.4764	2.45877	18.1223	2.01441	14.0216	1.8432	2.08416	1.05946	0.514685	0.741804	up	no
5237	MSTRG.2920.1	1	657	MSTRG.2920	.	0	0	0	0	0	0	9.8828	1.47481	0	0	0	0	0.820666	-0.285132	0.122334	0.459939	down	no
5238	MSTRG.2921.1	1	896	MSTRG.2921	.	0	0	1.66071	0.206164	0	0	8.42299	1.25696	0	0	0	0	0.886799	-0.173321	0.479282	0.719908	down	no
5239	MSTRG.2922.1	1	857	MSTRG.2922	.	0	0	3.32555	0.412839	0	0	9.92999	1.48185	0.902959	0.10037	0	0	0.878035	-0.18765	0.589073	0.78986	down	no
5240	MSTRG.2923.1	1	368	MSTRG.2923	.	0	0	0	0	0.820652	0.134893	11.8995	1.77575	0	0	14.2663	1.87538	0.555893	-0.847121	0.195213	0.570026	down	no
5241	MSTRG.2924.1	1	293	MSTRG.2924	.	0	0	0	0	0	0	10.7509	1.60435	0	0	0	0	0.811585	-0.301186	0.122334	0.459939	down	no
5244	MSTRG.2927.1	1	341	MSTRG.2927	.	0	0	0	0	0	0	0	0	0	0	11.8768	1.56127	0.694094	-0.526797	0.344931	0.690493	down	no
5245	MSTRG.2928.1	1	379	MSTRG.2928	.	8.24802	1.66613	0	0	0	0	0	0	0	0	0	0	1.38724	0.472218	0.456053	0.719252	up	no
5269	MSTRG.2933.1	1	213	MSTRG.2933	.	0	0	0	0	0	0	11.1737	1.66745	0	0	0	0	0.807358	-0.308719	0.122334	0.459939	down	no
5271	MSTRG.2935.1	1	202	MSTRG.2935	ENSSSCG00000027126	10.3168	2.08403	0	0	1.49505	0.245746	0	0	0	0	0	0	1.5762	0.65645	0.341797	0.690493	up	no
5274	MSTRG.2938.1	1	215	MSTRG.2938	.	0	0	0.697674	0.08661	0	0	10.5349	1.57212	0	0	0	0	0.834759	-0.260569	0.243505	0.622707	down	no
5275	MSTRG.2939.1	1	242	MSTRG.2939	.	8.46281	1.70951	0	0	11.2314	1.84614	12.4669	1.86044	3.46281	0.384915	3.6281	0.476931	1.2219	0.289124	0.584644	0.786468	up	no
5278	MSTRG.2942.1	1	375	MSTRG.2942	.	7.6	1.53522	0	0	0	0	0	0	0	0	0	0	1.36412	0.447975	0.456053	0.719252	up	no
5279	MSTRG.2943.1	1	255	MSTRG.2943	.	0.588235	0.118825	3.32549	0.412831	0	0	14.2118	2.12082	0	0	3.52941	0.463958	0.776555	-0.36484	0.374149	0.715172	down	no
5280	MSTRG.2944.1	1	230	MSTRG.2944	.	0	0	0.652174	0.080962	0	0	0	0	6.5087	0.723485	18.913	2.48621	0.509009	-0.974236	0.0780996	0.459939	down	no
5282	MSTRG.2945.1	1	1419	MSTRG.2945	.	0	0	0	0	0	0	7.23608	1.07984	7.2833	0.809588	0	0	0.674902	-0.56725	0.157611	0.522695	down	no
5283	MSTRG.2946.1	1	749	MSTRG.2946	.	1.60214	0.323636	6.09479	0.756617	4.15888	0.683609	11.0881	1.65468	4.00534	0.445221	4.34179	0.570749	0.923509	-0.114802	0.576848	0.781524	down	no
5290	MSTRG.2954.1	1	233	MSTRG.2954	RALGPS1	7.72532	1.56054	0	0	0	0	0	0	0	0	0	0	1.36866	0.452759	0.456053	0.719252	up	no
5293	MSTRG.2956.1	1	1353	MSTRG.2956	RALGPS1	9.20473	1.85938	17.9151	2.22401	12.3232	2.02561	3.79246	0.565947	4.43995	0.49353	1.65881	0.218059	2.17144	1.11865	0.00290799	0.169596	up	yes
5294	MSTRG.2957.1	1	408	MSTRG.2957	RALGPS1	0	0	0	0	9.03186	1.4846	4.44118	0.662755	6.98529	0.776462	0	0	0.990556	-0.0136902	0.981814	0.992415	down	no
5298	MSTRG.2960.1	1	3386	MSTRG.2960	RALGPS1	0	0	4.78571	0.594105	8.43119	1.38586	4.01359	0.598946	0	0	6.22061	0.81773	1.12912	0.175205	0.750466	0.882851	up	no
5299	MSTRG.2961.1	1	1372	MSTRG.2961	RALGPS1	6.88776	1.39135	0	0	0	0	0	0	4.48251	0.498261	6.45044	0.847942	0.898926	-0.153726	0.782947	0.901599	down	no
5300	MSTRG.2962.1	1	247	MSTRG.2962	.	0	0	0	0	8.48583	1.39484	0	0	0	0	0	0	1.36939	0.453535	0.414641	0.718646	up	no
5301	MSTRG.2963.1	1	255	MSTRG.2963	.	0	0	0	0	8.88235	1.46002	0	0	0.588235	0.065386	0	0	1.34864	0.43151	0.45166	0.719252	up	no
5318	MSTRG.2964.1	1	204	MSTRG.2964	.	12.5	2.52504	13.9706	1.73433	8.0049	1.31579	12.7684	1.90542	11.0294	1.22599	2.20588	0.289974	1.46871	0.554551	0.228896	0.607447	up	no
5319	MSTRG.2965.1	1	258	MSTRG.2965	.	5.23256	1.05699	15.4031	1.91216	22.4225	3.68566	47.407	7.07453	52.4961	5.8353	48.3256	6.35263	0.422019	-1.24462	0.0498552	0.447726	down	yes
5320	MSTRG.2966.1	1	247	MSTRG.2966	.	13.3239	2.69147	21.4737	2.66578	20.6721	3.39794	0	0	13.9352	1.54899	0	0	2.71444	1.44065	0.0572977	0.459939	up	no
5347	MSTRG.2982.1	1	250	MSTRG.2982	.	4.8	0.969615	6.6	0.819334	5.656	0.929696	0	0	13.664	1.51885	15	1.97182	0.869045	-0.202497	0.389279	0.718646	down	no
5364	MSTRG.2995.1	1	312	MSTRG.2995	.	0	0	9.88141	1.22669	10.1635	1.6706	0.967949	0.144447	5.28846	0.587848	0	0	1.47302	0.558776	0.391749	0.718646	up	no
5365	MSTRG.2996.1	1	743	MSTRG.2996	.	0	0	0	0	0	0	5.22354	0.779507	13.1225	1.45865	0	0	0.618887	-0.692251	0.214925	0.591377	down	no
5393	MSTRG.3010.1	2	753	MSTRG.3010	U3	2.81279	0.568193	11.7357	1.45688	6.50782	1.06971	5.93421	0.88556	9.95814	1.10692	10.4902	1.37899	0.922321	-0.116659	0.634006	0.816494	down	no
5407	MSTRG.3005.1	1	242	MSTRG.3005	.	16.0496	3.24207	27.2624	3.3844	23.5785	3.87568	19.8678	2.96486	42.281	4.69982	30.0909	3.9556	0.903319	-0.146693	0.318749	0.690493	down	no
5423	MSTRG.3015.1	1	242	MSTRG.3015	.	6.19835	1.25208	19.1777	2.38075	24.3017	3.99455	15.5826	2.32539	14.0744	1.56446	9.91736	1.30368	1.30499	0.384034	0.377428	0.717861	up	no
5453	MSTRG.3033.1	1	310	MSTRG.3033	NUP188	0	0	3.31613	0.411669	1.88387	0.309658	9.25484	1.3811	9.56129	1.0628	10.1613	1.33575	0.548309	-0.866938	0.0195967	0.307093	down	no
5475	MSTRG.3043.1	1	345	MSTRG.3043	ASB6	0	0	0	0	0	0	10.5043	1.56756	3.55593	0.395265	0	0	0.714065	-0.485873	0.101286	0.459939	down	no
5478	MSTRG.3039.1	1	297	MSTRG.3039	.	0	0	0	0	0	0	2.03367	0.303484	0	0	11.5758	1.52169	0.659081	-0.601472	0.278336	0.660184	down	no
5484	MSTRG.3047.1	1	218	MSTRG.3047	.	2.75229	0.555972	8.94495	1.11044	9.42202	1.54873	8.31193	1.24039	8.25688	0.917808	0	0	1.32421	0.405132	0.382423	0.718646	up	no
5496	MSTRG.3055.1	1	218	MSTRG.3055	USP20	2.75229	0.555972	2.75229	0.341674	2.07798	0.341565	0	0	16.1835	1.7989	0	0	0.940068	-0.0891623	0.871891	0.944209	down	no
5497	MSTRG.3052.1	1	308	MSTRG.3052	.	3.88312	0.784401	0	0	6.86364	1.1282	19.6104	2.92645	9.46104	1.05166	17.0455	2.24071	0.564091	-0.826	0.119029	0.459939	down	no
5498	MSTRG.3058.1	1	255	MSTRG.3058	.	0	0	11.1765	1.38746	0	0	0	0	0	0	0	0	1.3054	0.384489	0.480118	0.719908	up	no
5499	MSTRG.3059.1	1	411	MSTRG.3059	.	0	0	0	0	0	0	11.0219	1.64479	0	0	0	0	0.808861	-0.306036	0.122334	0.459939	down	no
5508	MSTRG.3057.1	1	291	MSTRG.3057	.	7.73196	1.56188	29.8969	3.71145	19.7182	3.24115	14.5292	2.16819	18.0412	2.00541	17.2027	2.26139	1.17955	0.238232	0.511451	0.739943	up	no
5514	MSTRG.3062.1	1	224	MSTRG.3062	.	0	0	0	0	0	0	9.4375	1.40836	0	0	0	0	0.825553	-0.276568	0.122334	0.459939	down	no
5561	MSTRG.3077.1	1	225	MSTRG.3077	RAPGEF1	0	0	0.915556	0.113659	0	0	10.7378	1.60239	0	0	0	0	0.838924	-0.253387	0.282991	0.664825	down	no
5562	MSTRG.3078.1	1	288	MSTRG.3078	RAPGEF1	0	0	0	0	0	0	0	0	0	0	11.6181	1.52725	0.697706	-0.519308	0.344931	0.690493	down	no
5565	MSTRG.3081.1	1	244	MSTRG.3081	MED27	7.9918	1.61437	0	0	0	0	0	0	0	0	0	0	1.37819	0.462778	0.456053	0.719252	up	no
5567	MSTRG.3082.1	1	531	MSTRG.3082	MED27	0	0	0	0	0	0	12.5122	1.8672	0	0	0	0	0.794742	-0.331442	0.122334	0.459939	down	no
5568	MSTRG.3083.1	1	229	MSTRG.3083	MED27	0	0	0	0	0	0	9.23144	1.3776	0	0	0	0	0.82787	-0.272524	0.122334	0.459939	down	no
5569	MSTRG.3084.1	1	317	MSTRG.3084	MED27	0	0	0	0	8.46688	1.39173	0	0	0	0	0	0	1.36875	0.452859	0.414641	0.718646	up	no
5572	MSTRG.3087.1	1	275	MSTRG.3087	MED27	6.54545	1.3222	0	0	0	0	0	0	0	0	0	0	1.32474	0.405711	0.456053	0.719252	up	no
5573	MSTRG.3088.1	1	414	MSTRG.3088	MED27	0.362319	0.07319	0	0	0	0	10.942	1.63288	0	0	0	0	0.828975	-0.2706	0.164017	0.533885	down	no
5583	MSTRG.3092.1	1	559	MSTRG.3092	ENSSSCG00000005725	0	0	0	0	0	0	0	0	0	0	14.5653	1.91468	0.660121	-0.599197	0.344931	0.690493	down	no
5585	MSTRG.3094.1	1	519	MSTRG.3094	.	0	0	0	0	0	0	11.5376	1.72175	0	0	0	0	0.803817	-0.31506	0.122334	0.459939	down	no
5594	MSTRG.3100.1	1	2554	MSTRG.3100	.	25.8383	5.21941	0	0	0	0	0	0	0	0	0	0	1.84052	0.880112	0.456053	0.719252	up	no
5618	MSTRG.3104.1	1	226	MSTRG.3104	ADAMTS13	10.5796	2.13712	19.9115	2.47184	16.0354	2.63579	14.031	2.09384	17.1637	1.90786	22.5221	2.96064	1.02691	0.0383073	0.837237	0.928363	up	no
5622	MSTRG.3107.1	1	419	MSTRG.3107	SLC2A6	7.3747	1.48971	7.17197	0.89034	0.360382	0.059237	0	0	1.43198	0.159174	3.15572	0.414834	1.38724	0.472218	0.333739	0.690493	up	no
5638	MSTRG.3119.1	1	1458	MSTRG.3119	.	6.68724	1.35084	7.88497	0.978852	7.2428	1.19052	4.55007	0.679005	0	0	11.8073	1.55212	1.34961	0.432539	0.419467	0.719252	up	no
5641	MSTRG.3123.1	1	251	MSTRG.3123	.	8.36653	1.69006	0	0	0	0	0	0	0	0	0	0	1.39139	0.476523	0.456053	0.719252	up	no
5671	MSTRG.3132.1	1	766	MSTRG.3132	ENSSSCG00000005768	0	0	0	0	2.34347	0.385205	0	0	23.9739	2.66486	0	0	0.674375	-0.568378	0.464514	0.719908	down	no
5698	MSTRG.3141.1	2	209	MSTRG.3141	.	8.61244	1.73974	12.7177	1.57879	11.5455	1.89777	1.19617	0.178504	13.9856	1.5546	4.67943	0.615133	1.51946	0.603556	0.0988751	0.459939	up	no
5706	MSTRG.3146.1	1	440	MSTRG.3146	.	0	0	0	0	0	0	6.52045	0.973045	11.8114	1.31291	0	0	0.619839	-0.690034	0.194931	0.569924	down	no
5711	MSTRG.3151.1	1	315	MSTRG.3151	ENSSSCG00000028791	0.952381	0.192384	0	0	1.91746	0.315179	13.3778	1.99636	0	0	4.27619	0.562126	0.774782	-0.368137	0.171109	0.541835	down	no
5712	MSTRG.3152.1	1	486	MSTRG.3152	ENSSSCG00000028791	0	0	2.34564	0.291191	2.4856	0.408566	9.27778	1.38452	0	0	9.5679	1.25775	0.737766	-0.438764	0.37973	0.718646	down	no
5713	MSTRG.3153.1	1	491	MSTRG.3153	ENSSSCG00000028791	0.610998	0.123423	12.831	1.59285	0	0	5.53564	0.826082	0	0	1.83299	0.240956	1.12241	0.166594	0.788909	0.904346	up	no
5714	MSTRG.3154.1	1	294	MSTRG.3154	ENSSSCG00000028791	5.61224	1.13369	0	0	10.7245	1.76282	0	0	12.2313	1.35959	0	0	1.32424	0.40516	0.60248	0.798078	up	no
5716	MSTRG.3156.1	1	280	MSTRG.3156	.	6.96429	1.40681	0	0	0	0	0	0	0	0	0	0	1.34066	0.422943	0.456053	0.719252	up	no
5717	MSTRG.3157.1	1	875	MSTRG.3157	.	0	0	0	0	0.690286	0.113465	9.08914	1.35637	0	0	1.54286	0.202816	0.802558	-0.317322	0.0566806	0.459939	down	no
5740	MSTRG.3170.1	1	746	MSTRG.3170	.	7.3807	1.49092	0	0	1.1181	0.183786	0	0	0	0	0	0	1.44103	0.527105	0.347141	0.692297	up	no
5741	MSTRG.3171.1	1	347	MSTRG.3171	.	0	0	0	0	9.57349	1.57363	0	0	0	0	0	0	1.40535	0.490925	0.414641	0.718646	up	no
5742	MSTRG.3172.1	1	714	MSTRG.3172	.	6.09244	1.23069	10.8964	1.35269	0	0	0	0	7.76891	0.863566	0	0	1.32946	0.410836	0.480354	0.720098	up	no
5743	MSTRG.3173.1	1	343	MSTRG.3173	.	0	0	0	0	0	0	0	0	13.4752	1.49786	0	0	0.697427	-0.519887	0.327684	0.690493	down	no
5745	MSTRG.3175.1	1	416	MSTRG.3175	.	7.49038	1.51308	0	0	0	0	0	0	0	0	6.5606	0.862423	1.06838	0.0954216	0.884984	0.949723	up	no
5746	MSTRG.3176.1	1	385	MSTRG.3176	.	0	0	0	0	0	0	10.1974	1.52175	0	0	0	0	0.817309	-0.291046	0.122334	0.459939	down	no
5749	MSTRG.3179.1	1	340	MSTRG.3179	.	0	0	0	0	0	0	9.32647	1.39179	0	0	0	0	0.826797	-0.274396	0.122334	0.459939	down	no
5750	MSTRG.3180.1	1	572	MSTRG.3180	.	2.0979	0.423783	3.93357	0.488319	0	0	1.58392	0.236367	0	0	11.5385	1.51679	0.847968	-0.237919	0.65927	0.831734	down	no
5812	MSTRG.3194.1	1	864	MSTRG.3194	.	9.52778	1.92464	18.3866	2.28254	8.72917	1.43484	7.40857	1.10558	25.088	2.7887	22.4942	2.95697	0.836755	-0.257123	0.0271841	0.350459	down	no
5826	MSTRG.3195.1	1	1334	MSTRG.3195	.	5.93703	1.1993	0	0	9.32684	1.53308	0	0	0	0	4.64468	0.610566	1.51074	0.595259	0.364544	0.707839	up	no
5831	MSTRG.3199.1	1	327	MSTRG.3199	.	8.69725	1.75687	0	0	0	0	0	0	10.8257	1.20335	0	0	1.0279	0.039697	0.957741	0.981398	up	no
5832	MSTRG.3200.1	1	822	MSTRG.3200	.	0	0	0	0	0	0	12.3479	1.84268	0	0	0	0	0.796232	-0.328739	0.122334	0.459939	down	no
5837	MSTRG.3205.1	1	1577	MSTRG.3205	.	6.90996	1.39583	7.41979	0.921103	5.84084	0.960078	2.67216	0.398766	6.56309	0.729532	0	0	1.56047	0.641978	0.116637	0.459939	up	no
5839	MSTRG.3207.1	1	438	MSTRG.3207	.	5.74886	1.16129	0	0	11.7374	1.92932	2.75799	0.411574	0	0	0	0	1.76641	0.82082	0.18231	0.557448	up	no
5850	MSTRG.3213.1	1	357	MSTRG.3213	EXD3	0	0	0	0	3.36695	0.553437	0	0	0	0	10.2101	1.34217	0.842086	-0.247961	0.66292	0.833517	down	no
5898	MSTRG.3225.1	1	262	MSTRG.3225	.	1.71756	0.346952	0	0	2.30534	0.378937	13.2557	1.97815	0	0	0	0	0.97732	-0.0330965	0.69731	0.853318	down	no
5899	MSTRG.3228.1	1	424	MSTRG.3228	.	0.700472	0.141497	1.06132	0.131754	1.27358	0.209344	9.25943	1.38178	2.47641	0.27527	1.06132	0.139516	0.830931	-0.267199	0.0681728	0.459939	down	no
5900	MSTRG.3229.1	1	881	MSTRG.3229	.	6.12486	1.23724	0	0	4.31271	0.708895	9.43076	1.40735	11.0375	1.22689	5.18855	0.68206	0.781142	-0.356344	0.439081	0.719252	down	no
5908	MSTRG.3234.1	1	305	MSTRG.3234	B3GALT2	8.36066	1.68888	0	0	5.94098	0.97654	4.4	0.65661	0	0	0	0	1.59253	0.671319	0.22498	0.603184	up	no
5910	MSTRG.3236.1	1	500	MSTRG.3236	.	0	0	0	0	0.604	0.099282	9.362	1.39709	0	0	0	0	0.855041	-0.225935	0.0851776	0.459939	down	no
5912	MSTRG.3239.1	1	598	MSTRG.3239	.	2.25752	0.456027	0	0	0	0	10.0201	1.49529	10.2843	1.14317	0	0	0.687907	-0.539714	0.308782	0.690181	down	no
5913	MSTRG.3240.1	1	862	MSTRG.3240	.	0	0	0	0	6.93178	1.1394	13.3944	1.99885	0	0	0	0	1.03483	0.0493916	0.877375	0.94636	up	no
5914	MSTRG.3241.1	1	596	MSTRG.3241	.	0	0	0	0	8.33725	1.37042	0	0	0	0	0	0	1.36435	0.448212	0.414641	0.718646	up	no
5915	MSTRG.3238.1	1	2404	MSTRG.3238	.	3.47504	0.701969	5.58361	0.693158	4.48627	0.737424	8.34734	1.24567	9.78453	1.08762	0	0	1.07405	0.103062	0.79848	0.9086	up	no
5919	MSTRG.3247.1	1	886	MSTRG.3247	.	0	0	2.2009	0.273223	0	0	13.2935	1.98378	0	0	0	0	0.848355	-0.237259	0.464046	0.719908	down	no
5920	MSTRG.3248.1	1	370	MSTRG.3248	.	0	0	0	0	0	0	9.38649	1.40074	0	0	2.62214	0.344693	0.736388	-0.441461	0.082223	0.459939	down	no
5921	MSTRG.3242.1	1	260	MSTRG.3242	.	34.4885	6.96677	52.9462	6.57282	38.6115	6.34671	17.8731	2.66719	31.0731	3.45398	18.45	2.42534	1.97611	0.982661	0.00509459	0.196907	up	no
5935	MSTRG.3245.1	1	214	MSTRG.3245	.	0	0	2.80374	0.34806	10.5701	1.73744	2.82243	0.42119	2.7757	0.308538	4.20561	0.552848	1.10581	0.145106	0.792335	0.90607	up	no
5945	MSTRG.3250.1	1	374	MSTRG.3250	.	0.40107	0.081017	2.80749	0.348526	3.63369	0.597282	9.68984	1.44601	0	0	2.80749	0.369058	0.969578	-0.0445718	0.85667	0.937057	down	no
5957	MSTRG.3262.1	1	1404	MSTRG.3262	ENSSSCG00000027207	0	0	0	0	8.55057	1.40549	0	0	0	0	0	0	1.37158	0.455838	0.414641	0.718646	up	no
5960	MSTRG.3265.1	1	469	MSTRG.3265	ENSSSCG00000027207	4.15778	0.839885	0	0	0	0	0	0	0	0	14.6183	1.92165	0.808357	-0.306935	0.663501	0.833873	down	no
5961	MSTRG.3266.1	1	3501	MSTRG.3266	ENSSSCG00000027207	5.36904	1.08456	8.02971	0.99682	8.22993	1.35278	9.25478	1.38109	0	0	0	0	1.77845	0.830618	0.000690637	0.113367	up	no
5962	MSTRG.3267.1	1	515	MSTRG.3267	ENSSSCG00000027207	0	0	0	0	0	0	0	0	0	0	10.1942	1.34007	0.718865	-0.476207	0.344931	0.690493	down	no
5963	MSTRG.3268.1	1	1037	MSTRG.3268	ENSSSCG00000027207	8.82353	1.78238	8.24494	1.02354	8.97203	1.47476	11.0665	1.65145	15.0434	1.67217	0	0	1.32845	0.409748	0.475061	0.719908	up	no
5965	MSTRG.3253.1	1	3315	MSTRG.3253	ENSSSCG00000029417	0	0	7.99668	0.99272	9.58552	1.5756	0	0	0	0	0	0	1.73623	0.795962	0.19382	0.568774	up	no
5970	MSTRG.3256.1	1	217	MSTRG.3256	.	6.91244	1.39633	0	0	0	0	0.695853	0.103842	0	0	0	0	1.31017	0.389756	0.486938	0.72405	up	no
5971	MSTRG.3257.1	1	216	MSTRG.3257	.	0	0	0	0	0	0	13.2824	1.98213	0.694444	0.077192	0	0	0.765229	-0.386037	0.0987277	0.459939	down	no
5972	MSTRG.3258.1	1	214	MSTRG.3258	.	0	0	0	0	0	0	15.5234	2.31655	0	0	0	0	0.769902	-0.377253	0.122334	0.459939	down	no
5977	MSTRG.3272.1	1	1006	MSTRG.3272	.	6.43778	1.30045	1.08247	0.134379	0	0	9.43837	1.40848	0	0	0	0	1.13312	0.180302	0.727941	0.87057	up	no
5978	MSTRG.3273.1	1	1396	MSTRG.3273	.	0	0	0	0	0	0	9.50287	1.41811	0	0	0	0	0.824825	-0.27784	0.122334	0.459939	down	no
5979	MSTRG.3274.1	1	411	MSTRG.3274	.	7.66423	1.5482	0	0	0	0	0	0	4.29197	0.477082	4.0146	0.527739	0.994149	-0.00846578	0.98831	0.995109	down	no
5981	MSTRG.3276.1	1	605	MSTRG.3276	TGFB2	0	0	0	0	0	0	13.2281	1.97402	0	0	0	0	0.788426	-0.342952	0.122334	0.459939	down	no
5982	MSTRG.3277.1	1	217	MSTRG.3277	TGFB2	0.691244	0.139633	0	0	9.39171	1.54375	0	0	0	0	0	0	1.46186	0.547802	0.336371	0.690493	up	no
5983	MSTRG.3278.1	1	546	MSTRG.3278	TGFB2	0	0	0	0	0	0	10.2326	1.52701	0	0	0	0	0.816939	-0.2917	0.122334	0.459939	down	no
5992	MSTRG.3285.1	5	1558	MSTRG.3285	BPNT1	3.39054	0.6849	17.878	2.21941	7.26415	1.19403	4.61198	0.688244	5.5401	0.61582	4.10892	0.540138	1.41095	0.496666	0.219535	0.596514	up	no
6011	MSTRG.3287.1	1	381	MSTRG.3287	.	0	0	7.08661	0.879743	0	0	9.46457	1.41239	9.83465	1.09319	6.56693	0.863255	0.58791	-0.766333	0.134895	0.483844	down	no
6014	MSTRG.3296.1	1	1111	MSTRG.3296	.	6.47525	1.30802	13.3474	1.65697	10.2988	1.69285	6.25202	0.932987	13.7507	1.52848	7.68587	1.01035	1.16766	0.223624	0.20998	0.586145	up	no
6015	MSTRG.3297.1	1	242	MSTRG.3297	.	0	0	7.78512	0.966457	0	0	10.6074	1.58294	0	0	10.5372	1.38516	0.71365	-0.486711	0.481147	0.720461	down	no
6017	MSTRG.3294.1	1	1231	MSTRG.3294	.	3.16816	0.639977	0	0	0	0	10.766	1.60661	0	0	0	0	0.957108	-0.063247	0.851845	0.934969	down	no
6026	MSTRG.3300.1	1	386	MSTRG.3300	.	0	0	6.99482	0.868347	3.12953	0.514412	0	0	15.1554	1.68463	9.32643	1.226	0.698651	-0.517355	0.186693	0.563163	down	no
6028	MSTRG.3304.1	1	3252	MSTRG.3304	.	4.52706	0.91448	11.4001	1.41522	1.74938	0.287552	0	0	9.01384	1.00195	0	0	1.35603	0.43939	0.36822	0.710599	up	no
6029	MSTRG.3305.1	1	2654	MSTRG.3305	.	0	0	7.36285	0.914035	0	0	0	0	6.4523	0.717217	0	0	0.986072	-0.0202351	0.964037	0.984349	down	no
6031	MSTRG.3307.1	1	1901	MSTRG.3307	.	0	0	0	0	8.6344	1.41927	0	0	6.3898	0.710269	0	0	1.11268	0.154034	0.808293	0.913546	up	no
6032	MSTRG.3308.1	1	726	MSTRG.3308	.	0	0	0	0	8.28926	1.36253	0	0	7.07442	0.78637	0	0	1.08447	0.116986	0.853625	0.935692	up	no
6033	MSTRG.3309.1	2	2829	MSTRG.3309	.	5.81018	1.17367	0.008484	0.001053	9.78933	1.60911	4.90739	0.732328	7.33124	0.814917	3.54295	0.465738	1.10713	0.146822	0.782148	0.901109	up	no
6036	MSTRG.3312.1	1	214	MSTRG.3312	DUSP10	0	0	0	0	0	0	15.4953	2.31236	0	0	0	0	0.770114	-0.376855	0.122334	0.459939	down	no
6037	MSTRG.3310.1	1	267	MSTRG.3310	.	0	0	0	0	0	0	9.04869	1.35033	0	0	0	0	0.829955	-0.268894	0.122334	0.459939	down	no
6038	MSTRG.3313.1	1	283	MSTRG.3313	.	6.89753	1.39332	4.40989	0.547451	0	0	0	0	0.932862	0.103694	0	0	1.47132	0.55711	0.278508	0.660346	up	no
6040	MSTRG.3315.1	1	203	MSTRG.3315	.	0	0	0	0	0	0	10.4138	1.55405	0	0	0	0	0.815044	-0.295049	0.122334	0.459939	down	no
6041	MSTRG.3316.1	1	310	MSTRG.3316	.	6.27097	1.26676	20.1484	2.50125	10.4581	1.71903	28.4871	4.25112	30.0484	3.34008	19.885	2.61398	0.656137	-0.607932	0.0968871	0.459939	down	no
6043	MSTRG.3319.1	1	1238	MSTRG.3319	.	0	0	0	0	0	0	9.53393	1.42274	0	0	0	0	0.824481	-0.278442	0.122334	0.459939	down	no
6056	MSTRG.3321.1	1	221	MSTRG.3321	.	0	0	0	0	0	0	10.9321	1.6314	0	0	0	0	0.809758	-0.304438	0.122334	0.459939	down	no
6057	MSTRG.3322.1	1	576	MSTRG.3322	.	2.60417	0.52605	0	0	0	0	11.0104	1.64308	0	0	0	0	0.931553	-0.10229	0.735925	0.874667	down	no
6058	MSTRG.3323.1	1	437	MSTRG.3323	.	0	0	0	0	0	0	12.0755	1.80202	0	0	0	0	0.798737	-0.324207	0.122334	0.459939	down	no
6059	MSTRG.3324.1	1	316	MSTRG.3324	.	1.89873	0.38355	0	0	0	0	10.2468	1.52913	0	0	0.949367	0.124799	0.869645	-0.201502	0.438623	0.719252	down	no
6061	MSTRG.3331.1	1	286	MSTRG.3331	.	6.27273	1.26711	0	0	0	0	0	0	0	0	0	0	1.31417	0.394149	0.456053	0.719252	up	no
6062	MSTRG.3332.1	1	778	MSTRG.3332	.	0	0	2.50257	0.310673	9.51028	1.56324	3.29177	0.49123	0	0	0	0	1.39728	0.482618	0.342601	0.690493	up	no
6063	MSTRG.3334.1	1	343	MSTRG.3334	.	0	0	0	0	0	0	0	0	0	0	7.39942	0.97269	0.768146	-0.380547	0.344931	0.690493	down	no
6064	MSTRG.3335.1	1	681	MSTRG.3335	.	0	0	0	0	0	0	9.71806	1.45022	6.82203	0.758314	0	0	0.658614	-0.602495	0.136658	0.487135	down	no
6066	MSTRG.3337.1	1	688	MSTRG.3337	.	0	0	0	0	0	0	10.2108	1.52375	1.57954	0.175577	0	0	0.766757	-0.383159	0.088293	0.459939	down	no
6068	MSTRG.3339.1	1	924	MSTRG.3339	.	0	0	0	0	0	0	10.7727	1.60761	0	0	0	0	0.811363	-0.30158	0.122334	0.459939	down	no
6069	MSTRG.3340.1	1	335	MSTRG.3340	.	4.28657	0.8659	0	0	0	0	0	0	0	0	0	0	1.23145	0.300362	0.456053	0.719252	up	no
6071	MSTRG.3342.1	1	469	MSTRG.3342	.	6.94243	1.40239	0	0	0	0	0	0	0	0	0	0	1.33984	0.422059	0.456053	0.719252	up	no
6072	MSTRG.3343.1	1	5059	MSTRG.3343	.	5.32279	1.07522	9.48409	1.17737	10.0996	1.66011	9.54754	1.42477	13.4902	1.49953	0	0	1.3236	0.404471	0.446677	0.719252	up	no
6076	MSTRG.3345.1	1	400	MSTRG.3345	.	6.75	1.36352	4.5	0.558637	8.6825	1.42717	2.6425	0.394339	0	0	11.575	1.52159	1.36428	0.448138	0.450704	0.719252	up	no
6083	MSTRG.3350.1	1	617	MSTRG.3350	.	0	0	0	0	0	0	0	0	11.0843	1.23209	0	0	0.729005	-0.455999	0.327684	0.690493	down	no
6084	MSTRG.3351.1	1	457	MSTRG.3351	.	0	0	0	0	0	0	14.2079	2.12024	0	0	0	0	0.780216	-0.358054	0.122334	0.459939	down	no
6085	MSTRG.3352.1	1	697	MSTRG.3352	.	1.27977	0.258517	7.1736	0.890542	8.44476	1.3881	0	0	0	0	1.71306	0.22519	1.65912	0.730416	0.117996	0.459939	up	no
6090	MSTRG.3356.1	1	1877	MSTRG.3356	.	0	0	14.3788	1.785	13.3031	2.18668	15.6713	2.33862	13.8918	1.54417	12.3402	1.62218	0.760385	-0.395198	0.567424	0.775512	down	no
6091	MSTRG.3357.1	1	578	MSTRG.3357	.	6.61246	1.33574	0	0	0	0	0	0	1.29758	0.144235	1.55709	0.204687	1.17095	0.227685	0.667799	0.836377	up	no
6098	MSTRG.3360.1	1	220	MSTRG.3360	RGS7	6.81818	1.37729	0	0	2.05909	0.33846	1.37273	0.204852	0	0	4.07727	0.535977	1.20528	0.26937	0.612639	0.804367	up	no
6100	MSTRG.3361.1	1	254	MSTRG.3361	.	1.1811	0.238586	1.1811	0.146624	0	0	10.7008	1.59687	2.79528	0.310714	0	0	0.817644	-0.290455	0.324804	0.690493	down	no
6103	MSTRG.3364.1	1	564	MSTRG.3364	.	0	0	0	0	0	0	9.10284	1.35841	0	0	0	0	0.829334	-0.269974	0.122334	0.459939	down	no
6111	MSTRG.3369.1	1	386	MSTRG.3369	DEGS1	0	0	0.388601	0.048242	0	0	8.60622	1.2843	0	0	0	0	0.847267	-0.239111	0.196754	0.571999	down	no
6113	MSTRG.3371.1	1	289	MSTRG.3371	.	0	0	0	0	0	0	13.5848	2.02725	0	0	0	0	0.785382	-0.348534	0.122334	0.459939	down	no
6120	MSTRG.3374.1	1	459	MSTRG.3374	.	0	0	0	0	0	0	11.1525	1.66428	0	0	0	0	0.807567	-0.308346	0.122334	0.459939	down	no
6124	MSTRG.3377.1	1	282	MSTRG.3377	.	3.7234	0.752139	0	0	1.07092	0.176031	12.4752	1.86167	0	0	8.33333	1.09546	0.762642	-0.390922	0.442493	0.719252	down	no
6131	MSTRG.3380.1	2	496	MSTRG.3380	.	7.24193	1.46289	1.79941	0.223382	0.129618	0.021306	1.18477	0.176804	3.582	0.398163	4.06894	0.534882	1.03707	0.0525097	0.91486	0.963245	up	no
6132	MSTRG.3381.1	1	362	MSTRG.3381	.	6.59668	1.33255	0	0	0	0	0	0	6.62983	0.736951	0	0	1.06754	0.0942901	0.874504	0.945272	up	no
6151	MSTRG.3390.1	1	275	MSTRG.3390	.	3.79636	0.766877	10.9091	1.35427	0	0	0	0	0	0	0	0	1.57179	0.652406	0.211291	0.58741	up	no
6158	MSTRG.3393.1	1	342	MSTRG.3393	.	36.6155	7.39644	85.1561	10.5714	73.6754	12.1103	29.9746	4.47309	57.4482	6.38575	34.4035	4.52251	1.75965	0.81529	0.056784	0.459939	up	no
6159	MSTRG.3389.1	2	467	MSTRG.3389	.	7.11563	1.43738	6.36134	0.789707	4.47966	0.736337	3.92291	0.585415	3.93148	0.43701	4.37687	0.575361	1.2899	0.367256	0.147616	0.506543	up	no
6160	MSTRG.3394.1	1	2361	MSTRG.3394	.	0	0	4.95172	0.614713	7.47776	1.22915	0.831427	0.124074	0	0	4.37865	0.575595	1.26273	0.33655	0.514332	0.74163	up	no
6162	MSTRG.3396.1	1	242	MSTRG.3396	.	6.81818	1.37729	0	0	0	0	0	0	0	0	0	0	1.33515	0.417002	0.456053	0.719252	up	no
6163	MSTRG.3397.1	1	815	MSTRG.3397	.	7.43804	1.50251	0	0	0	0	5.55828	0.82946	0	0	0	0	1.19058	0.251659	0.663789	0.833933	up	no
6165	MSTRG.3399.1	1	540	MSTRG.3399	.	0	0	4.16667	0.517256	9.8037	1.61147	1.67778	0.250374	0	0	0	0	1.5288	0.612395	0.265633	0.646699	up	no
6166	MSTRG.3400.1	1	281	MSTRG.3400	.	0	0	3.73665	0.463874	8.49822	1.39688	0	0	0	0	0	0	1.53938	0.62235	0.238313	0.616808	up	no
6167	MSTRG.3401.1	1	2569	MSTRG.3401	.	0	0	0	0	9.7174	1.59728	0	0	9.08408	1.00976	0	0	1.07123	0.0992662	0.890382	0.952247	up	no
6169	MSTRG.3403.1	1	548	MSTRG.3403	.	0	0	0	0	0	0	9.36131	1.39698	0	0	0	0	0.826405	-0.275079	0.122334	0.459939	down	no
6170	MSTRG.3404.1	1	328	MSTRG.3404	.	0	0	9.60366	1.19221	1.3811	0.227016	0	0	0	0	0	0	1.36892	0.453039	0.330201	0.690493	up	no
6171	MSTRG.3405.1	1	536	MSTRG.3405	.	0	0	7.27612	0.903268	8.67724	1.42631	0	0	0	0	9.95149	1.30817	1.21095	0.276141	0.68743	0.84817	up	no
6172	MSTRG.3406.1	1	347	MSTRG.3406	.	1.29683	0.261964	11.5793	1.43747	0	0	0	0	0	0	0	0	1.4198	0.505688	0.330985	0.690493	up	no
6173	MSTRG.3407.1	1	267	MSTRG.3407	.	1.12359	0.22697	0.561798	0.069742	0	0	9.61423	1.43473	0	0	0	0	0.900184	-0.151709	0.479235	0.719908	down	no
6174	MSTRG.3408.1	1	758	MSTRG.3408	.	8.36148	1.68904	0	0	0	0	0	0	0	0	8.1095	1.06603	1.04964	0.0698972	0.923101	0.966692	up	no
6175	MSTRG.3409.1	1	16063	MSTRG.3409	.	32.7266	6.61088	45.0395	5.59127	41.1149	6.7582	44.0161	6.56851	49.9414	5.55132	39.8708	5.24121	1.1053	0.144433	0.124101	0.462972	up	no
6177	MSTRG.3411.1	1	745	MSTRG.3411	.	0	0	0	0	0	0	2.02659	0.302428	12.8671	1.43027	0	0	0.665519	-0.587449	0.266994	0.648123	down	no
6191	MSTRG.3413.1	1	217	MSTRG.3413	.	1.63134	0.329535	0	0	2.78341	0.457519	21.5714	3.2191	0	0	0	0	0.920071	-0.120184	0.16121	0.52872	down	no
6204	MSTRG.3418.1	1	282	MSTRG.3418	.	8.87234	1.79224	0	0	0	0	0	0	0	0	0	0	1.40881	0.494474	0.456053	0.719252	up	no
6205	MSTRG.3419.1	1	424	MSTRG.3419	.	2.47641	0.500243	13.2594	1.64605	0	0	3.15802	0.47127	8.49057	0.943784	11.2925	1.48445	0.766607	-0.383442	0.431282	0.719252	down	no
6206	MSTRG.3420.1	1	1110	MSTRG.3420	.	0	0	0	0	0	0	2.17658	0.32481	11.0649	1.22993	0	0	0.685889	-0.543954	0.25777	0.638987	down	no
6207	MSTRG.3421.1	1	323	MSTRG.3421	.	0	0	1.62463	0.201684	0	0	10.2848	1.5348	0	0	0	0	0.863641	-0.211496	0.425185	0.719252	down	no
6208	MSTRG.3422.1	1	391	MSTRG.3422	.	0	0	0	0	2.30179	0.378353	12.7289	1.89953	0	0	0	0	0.889876	-0.168325	0.172479	0.543697	down	no
6209	MSTRG.3423.1	1	1041	MSTRG.3423	.	10.0231	2.02469	9.49087	1.17821	0	0	12.806	1.91103	9.78482	1.08765	0	0	1.08879	0.122721	0.875515	0.945641	up	no
6210	MSTRG.3427.1	1	401	MSTRG.3427	.	0	0	0	0	9.03741	1.48551	9.79052	1.46104	0	0	0	0	1.14033	0.189456	0.664135	0.834124	up	no
6211	MSTRG.3428.1	1	6059	MSTRG.3428	.	0	0	0	0	0	0	7.80911	1.16535	0	0	3.77615	0.496394	0.722534	-0.468862	0.107836	0.459939	down	no
6212	MSTRG.3429.1	1	676	MSTRG.3429	.	7.29882	1.47438	0	0	0	0	0	0	0	0	0	0	1.35311	0.436278	0.456053	0.719252	up	no
6214	MSTRG.3426.1	1	300	MSTRG.3426	.	2.48667	0.502314	0	0	0	0	10.0667	1.50225	0	0	0	0	0.937825	-0.092609	0.749638	0.882464	down	no
6220	MSTRG.3431.1	1	918	MSTRG.3431	.	0	0	2.06754	0.256667	0	0	0	0	0	0	9.64052	1.26729	0.780478	-0.357569	0.451344	0.719252	down	no
6222	MSTRG.3433.1	1	721	MSTRG.3433	.	0	0	0	0	0	0	12.1456	1.81249	0	0	0	0	0.798088	-0.32538	0.122334	0.459939	down	no
6223	MSTRG.3434.1	1	350	MSTRG.3434	.	0	0	0	0	0	0	9.06	1.35202	0	0	0	0	0.829825	-0.26912	0.122334	0.459939	down	no
6229	MSTRG.3441.1	1	1105	MSTRG.3441	.	0	0	5.37738	0.667556	0	0	0	0	12.943	1.4387	0	0	0.823395	-0.280343	0.602887	0.79827	down	no
6230	MSTRG.3442.1	1	394	MSTRG.3442	.	0	0	7.59898	0.943349	8.69797	1.42972	0	0	2.66498	0.29623	0.380711	0.050046	1.49474	0.579892	0.302621	0.683398	up	no
6233	MSTRG.3438.1	1	361	MSTRG.3438	.	0	0	0	0	0	0	10.0388	1.49808	0	0	0.831025	0.109242	0.786681	-0.34615	0.0792813	0.459939	down	no
6239	MSTRG.3454.2	1	10923	MSTRG.3454	AKT3	0	0	15.095	1.87391	8.91925	1.46609	12.2284	1.82484	13.8726	1.54203	0	0	1.05598	0.0785805	0.921967	0.966262	up	no
6240	MSTRG.3455.1	1	21754	MSTRG.3455	AKT3	6.09572	1.23135	14.8003	1.83733	9.30781	1.52996	11.4897	1.7146	0	0	10.7349	1.41115	1.43604	0.522093	0.335049	0.690493	up	no
6241	MSTRG.3456.1	1	1199	MSTRG.3456	AKT3	0	0	0	0	0	0	9.31443	1.38999	0	0	0	0	0.826932	-0.274159	0.122334	0.459939	down	no
6243	MSTRG.3458.1	1	7479	MSTRG.3458	AKT3	1.51277	0.305584	10.0781	1.25111	3.76457	0.618795	7.43074	1.10889	2.81416	0.312813	6.92983	0.910959	0.989632	-0.0150353	0.967794	0.986252	down	no
6244	MSTRG.3459.1	1	3566	MSTRG.3459	AKT3	0	0	0	0	5.07179	0.833667	8.99523	1.34235	5.26439	0.585173	0	0	0.861795	-0.214583	0.5845	0.786409	down	no
6245	MSTRG.3460.1	1	380	MSTRG.3460	AKT3	0	0	0	0	0	0	13.1132	1.95687	0	0	0	0	0.789422	-0.341132	0.122334	0.459939	down	no
6246	MSTRG.3461.1	1	447	MSTRG.3461	AKT3	7.38255	1.4913	0	0	0	0	0	0	0	0	0	0	1.35619	0.439558	0.456053	0.719252	up	no
6247	MSTRG.3462.1	1	2271	MSTRG.3462	AKT3	0	0	0	0	4.87803	0.801818	11.7023	1.74633	0	0	8.99956	1.18304	0.732341	-0.449412	0.389303	0.718646	down	no
6248	MSTRG.3463.1	1	565	MSTRG.3463	AKT3	0	0	0	0	0	0	12.223	1.82404	0	0	0	0	0.797375	-0.326669	0.122334	0.459939	down	no
6250	MSTRG.3465.1	1	491	MSTRG.3465	AKT3	0	0	0	0	0	0	15.3585	2.29194	8.85947	0.98479	0	0	0.588771	-0.76422	0.129771	0.475131	down	no
6251	MSTRG.3466.1	1	1473	MSTRG.3466	AKT3	3.38764	0.684314	0	0	0	0	10.0088	1.49361	6.99389	0.777418	0	0	0.777494	-0.363097	0.452935	0.719252	down	no
6252	MSTRG.3467.1	1	1925	MSTRG.3467	AKT3	0	0	0	0	0	0	9.48987	1.41617	0	0	0	0	0.824969	-0.277587	0.122334	0.459939	down	no
6265	MSTRG.3446.1	1	216	MSTRG.3446	.	0	0	0	0	3.49537	0.574546	5.94907	0.887778	15.7315	1.74866	0	0	0.688533	-0.538403	0.3993	0.718646	down	no
6272	MSTRG.3452.1	1	275	MSTRG.3452	.	0	0	0	0	9.78182	1.60787	0	0	0	0	0	0	1.41205	0.49779	0.414641	0.718646	up	no
6273	MSTRG.3453.1	1	206	MSTRG.3453	.	0	0	0	0	9.50485	1.56235	0	0	0	0	4.36893	0.574317	1.17646	0.234448	0.717371	0.864553	up	no
6284	MSTRG.3473.1	1	430	MSTRG.3473	.	6.96047	1.40603	1.39302	0.172932	0	0	3.13953	0.468512	3.48837	0.387756	0	0	1.13781	0.186257	0.729368	0.871419	up	no
6291	MSTRG.3477.1	2	8833	MSTRG.3477	.	26.0573	5.26365	93.9809	11.6669	84.1539	13.8327	123.886	18.4875	139.364	15.4913	111.599	14.6703	0.632126	-0.661715	0.234186	0.612869	down	no
6292	MSTRG.3477.2	2	9120	MSTRG.3477	.	1.09176	0.220539	1.058	0.131342	2.32057	0.381441	26.5641	3.96415	1.48114	0.164639	3.03095	0.398433	0.726857	-0.460256	0.036043	0.393902	down	no
6293	MSTRG.3475.1	1	2523	MSTRG.3475	.	21.7071	4.3849	46.7245	5.80045	34.5359	5.67678	26.8304	4.00388	31.9263	3.54882	30.4201	3.99888	1.29717	0.375372	0.0694427	0.459939	up	no
6295	MSTRG.3479.1	1	483	MSTRG.3479	EFCAB2	6.50518	1.31407	0	0	5.19048	0.853176	9.49068	1.41629	7.67702	0.853352	10.5466	1.3864	0.762708	-0.390798	0.421174	0.719252	down	no
6297	MSTRG.3480.1	1	254	MSTRG.3480	.	0	0	1.1811	0.146624	0	0	9.23622	1.37832	3.54331	0.393862	0	0	0.75746	-0.400759	0.19764	0.573025	down	no
6307	MSTRG.3489.1	1	380	MSTRG.3489	.	0	0	12.2184	1.51681	8.61579	1.41621	4.18158	0.624015	9.47368	1.05306	0	0	1.23529	0.30485	0.657088	0.830386	up	no
6309	MSTRG.3491.1	1	894	MSTRG.3491	.	0	0	0	0	8.60515	1.41446	0	0	0	0	10.3982	1.3669	0.982943	-0.0248199	0.973417	0.988594	down	no
6310	MSTRG.3492.1	1	411	MSTRG.3492	.	7.29197	1.473	19.4988	2.42061	14.1922	2.33282	8.45012	1.26101	15.8637	1.76336	15.6861	2.06202	1.10479	0.143768	0.493446	0.728511	up	no
6312	MSTRG.3494.1	1	4632	MSTRG.3494	.	0	0	15.4713	1.92063	12.5218	2.05825	10.8233	1.61515	0	0	0	0	1.68364	0.751581	0.319345	0.690493	up	no
6313	MSTRG.3495.1	1	5698	MSTRG.3495	.	0	0	18.2664	2.26762	7.86299	1.29247	11.6262	1.73497	15.7285	1.74833	13.242	1.74073	0.706383	-0.501478	0.459013	0.719908	down	no
6315	MSTRG.3497.1	1	974	MSTRG.3497	.	0	0	3.59446	0.446221	4.49487	0.738836	0	0	0	0	0	0	1.36633	0.450311	0.199237	0.575063	up	no
6316	MSTRG.3498.1	1	305	MSTRG.3498	.	3.93443	0.794766	13.6984	1.70053	5.4459	0.895161	5.94098	0.886571	13.7705	1.53068	10.7738	1.41627	0.889701	-0.168607	0.424296	0.719252	down	no
6317	MSTRG.3499.1	1	4717	MSTRG.3499	.	0	0	13.8796	1.72303	8.56379	1.40766	0	0	0	0	1.11296	0.146304	1.76837	0.822421	0.222958	0.60055	up	no
6318	MSTRG.3500.1	1	412	MSTRG.3500	.	0	0	0	0	12.0947	1.98804	0	0	0	0	0	0	1.48294	0.568461	0.414641	0.718646	up	no
6320	MSTRG.3502.1	1	245	MSTRG.3502	.	0	0	1.32929	0.16502	0	0	4.31429	0.643819	0	0	10.9551	1.4401	0.665006	-0.588562	0.277523	0.659282	down	no
6321	MSTRG.3503.1	1	376	MSTRG.3503	.	0	0	0	0	0	0	0	0	5.34049	0.593631	0	0	0.832397	-0.264656	0.327684	0.690493	down	no
6324	MSTRG.3506.1	1	497	MSTRG.3506	.	8.14889	1.6461	5.60966	0.696391	0	0	5.08853	0.75936	0	0	0	0	1.43826	0.524326	0.386918	0.718646	up	no
6325	MSTRG.3507.1	1	705	MSTRG.3507	.	8.7234	1.76215	20.1844	2.50572	12.8	2.10398	11.0766	1.65296	16.3603	1.81856	18.0312	2.37029	1.03934	0.0556708	0.715358	0.863477	up	no
6336	MSTRG.3509.1	1	308	MSTRG.3509	.	2.43506	0.491891	6.81818	0.846419	0	0	10.2305	1.5267	0	0	0.487013	0.06402	1.09974	0.137168	0.76766	0.892519	up	no
6338	MSTRG.3511.1	1	219	MSTRG.3511	.	0	0	0	0	9.65297	1.58669	0	0	0	0	0	0	1.40791	0.493555	0.414641	0.718646	up	no
6339	MSTRG.3512.1	1	274	MSTRG.3512	.	2.72628	0.550716	2.73723	0.339803	1.10219	0.181171	10.9562	1.63499	4.92701	0.54767	4.92701	0.647679	0.754905	-0.405633	0.107909	0.459939	down	no
6340	MSTRG.3513.1	1	212	MSTRG.3513	.	0	0	0	0	0	0	12.8208	1.91324	0	0	0	0	0.791986	-0.336454	0.122334	0.459939	down	no
6341	MSTRG.3514.1	1	498	MSTRG.3514	.	0	0	0	0	8.08233	1.32852	9.3996	1.4027	0	0	0	0	1.11971	0.163122	0.682954	0.845431	up	no
6342	MSTRG.3515.1	1	230	MSTRG.3515	.	14.3478	2.8983	0	0	0	0	0	0	0	0	0	0	1.5748	0.655165	0.456053	0.719252	up	no
6344	MSTRG.3517.1	1	365	MSTRG.3517	.	1.23288	0.249045	0	0	3.30959	0.544008	9.74794	1.45468	0	0	0	0	1.03534	0.0501077	0.550022	0.76427	up	no
6345	MSTRG.3518.1	1	229	MSTRG.3518	.	0	0	0	0	0	0	13.1878	1.96801	0	0	0	0	0.788775	-0.342315	0.122334	0.459939	down	no
6346	MSTRG.3519.1	1	301	MSTRG.3519	.	0.996678	0.201332	1.99336	0.247458	0.501661	0.08246	9.53156	1.42239	1.99336	0.221575	2.49169	0.327545	0.79908	-0.323589	0.145152	0.502501	down	no
6347	MSTRG.3520.1	1	640	MSTRG.3520	.	7.26094	1.46673	0	0	0	0	0	0	0	0	0	0	1.35171	0.434786	0.456053	0.719252	up	no
6350	MSTRG.3523.1	1	370	MSTRG.3523	.	0.405405	0.081893	0	0	0	0	9.79459	1.46164	0	0	0	0	0.843494	-0.245551	0.176276	0.549261	down	no
6351	MSTRG.3527.1	1	1143	MSTRG.3527	.	1.44357	0.291606	0	0	0	0	12.1339	1.81073	0	0	0	0	0.869368	-0.201962	0.403856	0.718646	down	no
6352	MSTRG.3528.1	1	936	MSTRG.3528	.	0	0	0	0	3.85791	0.634137	12.5833	1.87781	4.53632	0.504243	0	0	0.806961	-0.309429	0.344879	0.690493	down	no
6353	MSTRG.3529.1	1	1257	MSTRG.3529	.	0	0	0	0	0	0	10.6269	1.58585	0	0	0	0	0.812848	-0.298943	0.122334	0.459939	down	no
6354	MSTRG.3530.1	1	566	MSTRG.3530	.	0	0	0	0	1.32862	0.21839	14.606	2.17965	0	0	0	0	0.834274	-0.261407	0.0750872	0.459939	down	no
6356	MSTRG.3533.1	1	1251	MSTRG.3533	.	0	0	0	0	0	0	8.5044	1.26911	6.28904	0.699069	2.8777	0.378287	0.59933	-0.738578	0.00910341	0.235936	down	no
6358	MSTRG.3531.1	1	336	MSTRG.3531	.	0	0	0	0	0	0	9.88691	1.47542	0	0	0	0	0.820622	-0.28521	0.122334	0.459939	down	no
6359	MSTRG.3535.1	1	364	MSTRG.3535	.	0	0	0	0	0	0	9.54121	1.42383	0	0	0	0	0.8244	-0.278583	0.122334	0.459939	down	no
6360	MSTRG.3536.1	1	238	MSTRG.3536	.	6.93277	1.40044	0	0	0	0	0	0	10.1655	1.12997	0	0	0.994654	-0.00773363	0.990782	0.996134	down	no
6361	MSTRG.3537.1	1	1492	MSTRG.3537	.	3.41622	0.690087	0	0	0	0	9.91622	1.47979	0	0	0	0	0.977345	-0.0330595	0.924974	0.967394	down	no
6363	MSTRG.3540.1	1	2811	MSTRG.3540	.	0	0	6.2476	0.775586	0	0	10.3095	1.53848	0	0	0	0	0.973018	-0.0394617	0.934069	0.971902	down	no
6366	MSTRG.3539.1	1	418	MSTRG.3539	.	0	0	0	0	8.30861	1.36572	0	0	0	0	0	0	1.36337	0.44718	0.414641	0.718646	up	no
6367	MSTRG.3544.1	1	376	MSTRG.3544	.	0	0	0	0	2.00798	0.330058	10.0106	1.49388	0	0	9.90958	1.30266	0.65674	-0.606606	0.237536	0.615889	down	no
6368	MSTRG.3545.1	1	2489	MSTRG.3545	.	0	0	0	0	0	0	10.5056	1.56775	1.11005	0.12339	1.48574	0.195307	0.725608	-0.462738	0.0296301	0.363096	down	no
6369	MSTRG.3543.1	1	251	MSTRG.3543	.	1.19522	0.241438	2.98805	0.370941	0	0	0	0	0	0	10.1594	1.3355	0.851706	-0.231572	0.628739	0.813408	down	no
6370	MSTRG.3546.1	1	332	MSTRG.3546	.	4.06626	0.821398	4.51807	0.56088	2.71687	0.446581	10.4608	1.56107	16.6084	1.84614	9.48795	1.24724	0.630135	-0.666266	0.0263743	0.345893	down	no
6372	MSTRG.3548.1	1	885	MSTRG.3548	.	4.0678	0.821707	10.339	1.2835	0	0	15.4938	2.31213	7.27402	0.808556	5.76419	0.757732	0.770772	-0.375624	0.500732	0.733068	down	no
6379	MSTRG.3551.1	1	331	MSTRG.3551	.	9.06344	1.83084	0	0	0	0	3.64955	0.544621	1.81269	0.201493	2.26586	0.297859	1.08222	0.113997	0.85876	0.938162	up	no
6383	MSTRG.3553.1	1	278	MSTRG.3553	.	0	0	0	0	0	0	10.3201	1.54007	0.539568	0.059977	0	0	0.797523	-0.326402	0.100023	0.459939	down	no
6384	MSTRG.3557.1	1	607	MSTRG.3557	.	0	0	0	0	0	0	12.6689	1.89057	0	0	0	0	0.793336	-0.333996	0.122334	0.459939	down	no
6386	MSTRG.3559.1	1	959	MSTRG.3559	.	0	0	0	0	0	0	12.1877	1.81876	0	0	0	0	0.7977	-0.326081	0.122334	0.459939	down	no
6387	MSTRG.3560.1	1	487	MSTRG.3560	.	0	0	0	0	0	0	11.1622	1.66573	0	0	0	0	0.807471	-0.308517	0.122334	0.459939	down	no
6395	MSTRG.3566.1	1	420	MSTRG.3566	.	0	0	0	0	0	0	13.6881	2.04267	0	0	0	0	0.784512	-0.350132	0.122334	0.459939	down	no
6396	MSTRG.3567.1	1	450	MSTRG.3567	.	0	0	0	0	0	0	9.06	1.35202	0	0	0	0	0.829825	-0.26912	0.122334	0.459939	down	no
6397	MSTRG.3568.1	1	250	MSTRG.3568	.	0	0	13.552	1.68237	0	0	0	0	0	0	0	0	1.3528	0.435947	0.480118	0.719908	up	no
6398	MSTRG.3569.1	1	2248	MSTRG.3569	.	3.59964	0.727139	0	0	0	0	0	0	9.22198	1.02509	0	0	0.909045	-0.137576	0.785325	0.902818	down	no
6399	MSTRG.3570.1	1	297	MSTRG.3570	.	0	0	0	0	2.84175	0.467108	0	0	0	0	9.59596	1.26144	0.836242	-0.258007	0.6293	0.813663	down	no
6400	MSTRG.3573.1	1	536	MSTRG.3573	.	0	0	0	0	8.61754	1.41649	0	0	0	0	0	0	1.37384	0.458209	0.414641	0.718646	up	no
6401	MSTRG.3574.1	1	1986	MSTRG.3574	.	2.94008	0.593905	2.93152	0.363923	1.78953	0.294151	7.05217	1.05239	0	0	3.43303	0.451289	1.04295	0.0606669	0.806288	0.91266	up	no
6402	MSTRG.3575.1	1	411	MSTRG.3575	.	5.83942	1.17958	1.37226	0.170355	0	0	8.80292	1.31366	6.56934	0.730227	0	0	0.913443	-0.130614	0.812896	0.915964	down	no
6403	MSTRG.3576.1	1	368	MSTRG.3576	.	0	0	0	0	0	0	12.3016	1.83577	3.63587	0.404151	0	0	0.697013	-0.520742	0.0981628	0.459939	down	no
6404	MSTRG.3577.1	1	1069	MSTRG.3577	.	3.78859	0.765306	0	0	8.33396	1.36988	0	0	12.7521	1.41748	0	0	1.1651	0.220457	0.75378	0.88467	up	no
6406	MSTRG.3579.1	1	323	MSTRG.3579	.	0	0	3.71517	0.461207	1.81424	0.298213	18.3808	2.74296	0	0	7.43034	0.976755	0.7101	-0.493906	0.322837	0.690493	down	no
6407	MSTRG.3580.1	1	1947	MSTRG.3580	.	1.10762	0.223743	1.61479	0.200463	0	0	10.2876	1.53522	0	0	5.67848	0.746464	0.743762	-0.427086	0.281436	0.663209	down	no
6408	MSTRG.3581.1	1	583	MSTRG.3581	.	0	0	1.80103	0.223582	0	0	10.9391	1.63244	0	0	0	0	0.861301	-0.21541	0.443417	0.719252	down	no
6410	MSTRG.3572.1	1	462	MSTRG.3572	.	1.62338	0.327927	0	0	1.30736	0.214895	12.3939	1.84954	3.8658	0.42971	0	0	0.81516	-0.294844	0.267427	0.648378	down	no
6417	MSTRG.3583.1	1	289	MSTRG.3583	.	0	0	0	0	0	0	12.5398	1.87131	0	0	0	0	0.794494	-0.331893	0.122334	0.459939	down	no
6423	MSTRG.3587.1	1	597	MSTRG.3587	.	0	0	0	0	0	0	12.6466	1.88724	0	0	0	0	0.793535	-0.333634	0.122334	0.459939	down	no
6424	MSTRG.3588.1	1	1022	MSTRG.3588	.	3.66341	0.740019	0	0	8.31605	1.36694	0	0	5.60224	0.622727	0	0	1.35589	0.439244	0.449021	0.719252	up	no
6425	MSTRG.3589.1	1	711	MSTRG.3589	.	0	0	0	0	0	0	12.7314	1.8999	0	0	0	0	0.792779	-0.33501	0.122334	0.459939	down	no
6430	MSTRG.3590.1	1	201	MSTRG.3590	.	0	0	0	0	0	0	15.0249	2.24216	2.78607	0.30969	0	0	0.695763	-0.523332	0.0898649	0.459939	down	no
6438	MSTRG.3592.1	1	247	MSTRG.3592	.	0	0	12.1457	1.50779	8.5587	1.40682	15.8947	2.37196	17.5992	1.95627	9.7166	1.2773	0.661275	-0.596678	0.340158	0.690493	down	no
6449	MSTRG.3601.1	1	338	MSTRG.3601	ENSSSCG00000021897	7.97041	1.61005	15.7071	1.9499	5.80769	0.95463	11.1243	1.66007	3.97337	0.441667	4.41124	0.579879	1.43021	0.516224	0.166303	0.536357	up	no
6452	MSTRG.3599.1	1	1819	MSTRG.3599	.	17.1583	3.46604	30.5245	3.78935	22.6014	3.71507	24.9802	3.72779	23.8653	2.65279	20.9032	2.74783	1.19209	0.253498	0.0209003	0.315771	up	no
6454	MSTRG.3604.1	1	371	MSTRG.3604	.	7.05121	1.42437	0	0	0	0	0	0	0	0	0	0	1.34392	0.426444	0.456053	0.719252	up	no
6455	MSTRG.3605.1	1	311	MSTRG.3605	.	9.53055	1.9252	0	0	0.971061	0.159617	0	0	3.37621	0.375288	0	0	1.33128	0.412809	0.53579	0.755511	up	no
6457	MSTRG.3607.1	1	788	MSTRG.3607	.	0	0	3.04569	0.378096	0	0	9.55457	1.42582	0	0	0	0	0.909315	-0.137148	0.674822	0.84053	down	no
6458	MSTRG.3608.1	1	272	MSTRG.3608	.	0	0	0	0	2.22059	0.365006	12.2169	1.82313	0	0	0	0	0.891944	-0.164975	0.169427	0.540363	down	no
6462	MSTRG.3610.1	1	669	MSTRG.3610	.	0	0	0	0	5.35325	0.879933	0	0	12.5561	1.39569	0	0	0.889858	-0.168353	0.791878	0.905788	down	no
6463	MSTRG.3611.1	1	270	MSTRG.3611	.	0	0	0	0	0	0	10.6259	1.5857	4.44444	0.49403	0	0	0.69403	-0.526929	0.109862	0.459939	down	no
6464	MSTRG.3612.1	1	278	MSTRG.3612	.	0	0	0	0	10.1619	1.67034	0	0	0	0	0	0	1.42413	0.510083	0.414641	0.718646	up	no
6466	MSTRG.3616.1	1	417	MSTRG.3616	.	0	0	0	0	8.69065	1.42851	0	0	0	0	0	0	1.37629	0.460785	0.414641	0.718646	up	no
6467	MSTRG.3617.1	1	220	MSTRG.3617	.	0	0	0	0	0	0	2.02273	0.301851	0	0	10.7818	1.41732	0.67017	-0.577402	0.27581	0.657324	down	no
6469	MSTRG.3619.1	1	490	MSTRG.3619	.	5.1551	1.04135	13.4633	1.67135	0	0	0	0	0	0	0	0	1.71447	0.777766	0.203842	0.580403	up	no
6470	MSTRG.3613.1	1	211	MSTRG.3613	.	0	0	0	0	9.18957	1.51052	0	0	0	0	0	0	1.39284	0.478033	0.414641	0.718646	up	no
6472	MSTRG.3622.1	1	370	MSTRG.3622	.	0	0	12.9649	1.60948	0	0	0	0	1.90865	0.212159	0	0	1.24359	0.314507	0.589671	0.790279	up	no
6475	MSTRG.3621.1	1	248	MSTRG.3621	.	50.0968	10.1197	67.0403	8.32249	34.5968	5.68679	68.2339	10.1825	74.8266	8.31748	54.8992	7.21677	0.950067	-0.0738991	0.808929	0.913946	down	no
6476	MSTRG.3620.1	1	225	MSTRG.3620	.	0	0	2.64	0.327734	0	0	9.30667	1.38883	0	0	0	0	0.902025	-0.148761	0.625032	0.811654	down	no
6480	MSTRG.3625.1	1	218	MSTRG.3625	ATP6V1G3	0	0	4.12844	0.512511	0	0	9.69725	1.44712	0	0	0	0	0.933824	-0.0987781	0.794645	0.907081	down	no
6491	MSTRG.3635.1	1	3968	MSTRG.3635	ENSSSCG00000024975	13.9806	2.82412	32.6361	4.05149	14.4962	2.38279	12.1391	1.81151	17.7882	1.97728	12.7625	1.67769	1.41212	0.497863	0.0885372	0.459939	up	no
6492	MSTRG.3636.1	1	1992	MSTRG.3636	ENSSSCG00000024975	8.81476	1.78061	22.005	2.73174	10.0065	1.64481	10.1215	1.51043	11.2344	1.24878	7.13153	0.937474	1.37465	0.459067	0.122301	0.459939	up	no
6493	MSTRG.3628.1	1	448	MSTRG.3628	.	0	0	0	0	0	0	9.77455	1.45865	0	0	0	0	0.821839	-0.283072	0.122334	0.459939	down	no
6494	MSTRG.3629.1	1	378	MSTRG.3629	.	0	0	0	0	0	0	0	0	0	0	11.8545	1.55833	0.694403	-0.526155	0.344931	0.690493	down	no
6502	MSTRG.3637.1	1	239	MSTRG.3637	.	0	0	0	0	5.05439	0.830808	0	0	3.72385	0.413931	10.6695	1.40255	0.771848	-0.373611	0.501096	0.733189	down	no
6512	MSTRG.3643.1	1	2234	MSTRG.3643	.	4.89884	0.98958	5.0345	0.62499	7.85721	1.29152	5.27081	0.786562	0	0	0	0	1.73365	0.79381	0.00211769	0.153482	up	no
6513	MSTRG.3644.1	1	828	MSTRG.3644	.	0	0	10.2295	1.2699	12.8913	2.11899	0	0	12.8623	1.42973	5.97826	0.785872	1.08969	0.123913	0.855301	0.936446	up	no
6514	MSTRG.3645.1	1	2090	MSTRG.3645	.	0	0	9.77751	1.21379	7.28086	1.19678	6.4756	0.966351	8.96938	0.997007	5.9313	0.779699	0.889695	-0.168617	0.732758	0.872892	down	no
6516	MSTRG.3647.1	1	704	MSTRG.3647	.	0	0	0	0	0	0	10.1562	1.51561	0	0	0	0	0.817744	-0.290278	0.122334	0.459939	down	no
6524	MSTRG.3655.7	5	874	MSTRG.3655	CACNA1S	8.46696	1.71035	49.2372	6.11238	6.15971	1.01249	14.8431	2.21503	9.98347	1.10973	9.19463	1.20868	1.38976	0.474838	0.535753	0.755478	up	no
6528	MSTRG.3655.8	4	819	MSTRG.3655	CACNA1S	0.16265	0.032856	19.0602	2.36616	1.79496	0.295043	0	0	0.035269	0.00392	1.43081	0.188087	1.50249	0.587353	0.397647	0.718646	up	no
6530	MSTRG.3648.1	1	226	MSTRG.3648	.	14.4956	2.92815	28.1947	3.50013	18.708	3.07509	11.1991	1.67124	16.1903	1.79966	23.5133	3.09093	1.29241	0.370065	0.154486	0.517846	up	no
6538	MSTRG.3649.1	2	3780	MSTRG.3649	.	86.6886	17.5114	151.359	18.79	95.4746	15.6935	67.755	10.1111	103.76	11.5337	90.5918	11.9087	1.47409	0.559826	0.00309822	0.172181	up	no
6540	MSTRG.3653.1	1	285	MSTRG.3653	TNNT2	15.2632	3.0832	17.3509	2.15396	24.9018	4.09319	31.7895	4.74393	33.6561	3.74111	26.3018	3.45749	0.846362	-0.240653	0.308686	0.690174	down	no
6551	MSTRG.3661.1	1	460	MSTRG.3661	ENSSSCG00000030694	3.91304	0.790447	10.8174	1.34289	13.5522	2.22762	6.79783	1.01444	4.56522	0.507455	4.41739	0.580688	1.46942	0.55525	0.130038	0.475621	up	no
6560	MSTRG.3669.1	1	222	MSTRG.3669	.	4.05405	0.818931	0	0	8.74324	1.43716	0	0	0	0	6.08108	0.799388	1.33948	0.421673	0.500792	0.733068	up	no
6565	MSTRG.3674.1	1	317	MSTRG.3674	.	0	0	0.473186	0.058742	0	0	9.05047	1.3506	0	0	0	0	0.844571	-0.24371	0.211116	0.587297	down	no
6589	MSTRG.3680.1	1	238	MSTRG.3680	.	14.9412	3.01816	30.6471	3.80457	27.8992	4.58588	22.5336	3.36268	33.042	3.67284	35.2185	4.62964	0.965638	-0.050445	0.81271	0.915947	down	no
6591	MSTRG.3683.1	1	274	MSTRG.3683	GPR37L1	2.73723	0.552928	21.865	2.71435	12.427	2.04267	20.3029	3.0298	33.2263	3.69332	18.6022	2.44535	0.641747	-0.639923	0.266876	0.647986	down	no
6604	MSTRG.3702.1	1	365	MSTRG.3702	PPP1R12B	0.821918	0.16603	0	0	0	0	14.7014	2.19388	0	0	7.72923	1.01605	0.622373	-0.68415	0.154935	0.51864	down	no
6608	MSTRG.3698.1	1	736	MSTRG.3698	.	0	0	0	0	0	0	11.0788	1.65329	0	0	0	0	0.808296	-0.307044	0.122334	0.459939	down	no
6610	MSTRG.3700.1	1	929	MSTRG.3700	.	3.2047	0.647359	0	0	0	0	12.986	1.9379	0	0	0	0	0.933854	-0.0987309	0.778747	0.898871	down	no
6611	MSTRG.3704.1	1	378	MSTRG.3704	.	0	0	0	0	0	0	16.3757	2.44373	0	0	0	0	0.763609	-0.389094	0.122334	0.459939	down	no
6612	MSTRG.3705.1	1	278	MSTRG.3705	.	0	0	0	0	0	0	9.06115	1.35219	0	0	0	0	0.829812	-0.269143	0.122334	0.459939	down	no
6621	MSTRG.3711.1	1	280	MSTRG.3711	RABIF	15.6607	3.16351	0	0	0	0	17.8071	2.65735	0	0	0	0	1.21321	0.278828	0.757488	0.886931	up	no
6634	MSTRG.3715.1	1	450	MSTRG.3715	.	5.66	1.14334	0	0	0	0	13.1022	1.95524	0	0	3.33333	0.438183	0.884306	-0.177382	0.734931	0.874171	down	no
6643	MSTRG.3723.1	1	2237	MSTRG.3723	.	4.34019	0.876731	4.56236	0.566378	4.04426	0.664768	9.40724	1.40384	13.814	1.53552	6.90427	0.907601	0.757858	-0.4	0.093438	0.459939	down	no
6644	MSTRG.3724.1	1	296	MSTRG.3724	.	0.506757	0.102366	0	0	0	0	0	0	2.40586	0.267428	9.58784	1.26037	0.685651	-0.544454	0.172544	0.543708	down	no
6645	MSTRG.3725.1	1	1353	MSTRG.3725	.	0	0	5.35772	0.665116	6.87066	1.12935	12.7842	1.90778	12.493	1.38868	0	0	0.862999	-0.21257	0.731394	0.872263	down	no
6646	MSTRG.3720.1	1	1669	MSTRG.3720	.	0	0	0	0	0	0	0	0	12.4434	1.38316	8.41822	1.10662	0.53199	-0.91053	0.00571114	0.203646	down	no
6649	MSTRG.3727.1	1	957	MSTRG.3727	.	5.95611	1.20315	0	0	5.51202	0.906029	8.77743	1.30985	13.6102	1.51287	0	0	0.951732	-0.071372	0.910362	0.961238	down	no
6651	MSTRG.3729.1	1	696	MSTRG.3729	ENSSSCG00000010935	0	0	21.0862	2.61767	0	0	14.3147	2.13617	12.3793	1.37604	9.91379	1.30322	0.594458	-0.750353	0.387551	0.718646	down	no
6652	MSTRG.3730.1	1	653	MSTRG.3730	ENSSSCG00000010935	5.97243	1.20645	0	0	8.78714	1.44437	0	0	7.02297	0.780651	0	0	1.43155	0.517581	0.435146	0.719252	up	no
6669	MSTRG.3739.1	1	215	MSTRG.3739	.	0	0	0	0	0	0	11.2372	1.67692	16.293	1.81108	3.48837	0.458564	0.463862	-1.10823	0.0427962	0.419787	down	yes
6694	MSTRG.3759.1	1	363	MSTRG.3759	.	0	0	5.75207	0.71407	9.11846	1.49883	0	0	8.22589	0.914364	2.06612	0.271601	1.15694	0.210316	0.710142	0.860555	up	no
6695	MSTRG.3760.1	1	482	MSTRG.3760	.	0	0	0.580913	0.072115	0.626556	0.102989	11.2593	1.68023	0	0	0	0	0.853491	-0.228551	0.203091	0.579405	down	no
6696	MSTRG.3761.1	2	1888	MSTRG.3761	.	4.29026	0.866645	6.82521	0.847292	0.725106	0.119188	0.934852	0.139508	2.20922	0.245569	11.4047	1.4992	0.966827	-0.0486705	0.914187	0.962994	down	no
6697	MSTRG.3762.1	1	244	MSTRG.3762	.	7.37705	1.49019	0	0	0	0	0	0	0	0	0	0	1.35599	0.439343	0.456053	0.719252	up	no
6698	MSTRG.3763.1	1	353	MSTRG.3763	.	5.09915	1.03004	15.4816	1.92191	6.33428	1.04119	3.84986	0.574513	13.9745	1.55336	12.2436	1.60949	0.981328	-0.0271923	0.860959	0.939184	down	no
6700	MSTRG.3765.1	1	1034	MSTRG.3765	.	0.725339	0.146521	5.76306	0.715434	0	0	4.67311	0.697367	5.06576	0.563094	5.78143	0.759997	0.740971	-0.432511	0.213969	0.590062	down	no
6714	MSTRG.3773.1	1	2330	MSTRG.3773	ZCCHC6	4.77983	0.96554	0	0	6.803	1.11823	0	0	0	0	0	0	1.64172	0.715209	0.1659	0.535957	up	no
6717	MSTRG.3768.1	1	222	MSTRG.3768	.	0	0	0	0	0	0	10.8829	1.62405	1.22523	0.136192	1.35135	0.177642	0.723138	-0.467658	0.0301435	0.365651	down	no
6727	MSTRG.3776.1	1	273	MSTRG.3776	.	3.84615	0.776935	8.24176	1.02314	8.2967	1.36376	14.2857	2.13185	19.1648	2.1303	7.14286	0.938964	0.788262	-0.343253	0.290437	0.672112	down	no
6742	MSTRG.3781.1	1	775	MSTRG.3781	.	0	0	0	0	0	0	9.54323	1.42413	0	0	0	0	0.824378	-0.278623	0.122334	0.459939	down	no
6743	MSTRG.3786.1	1	843	MSTRG.3786	.	6.76157	1.36586	5.16014	0.640588	0	0	0	0	7.48398	0.831895	0	0	1.22232	0.28962	0.596087	0.794214	up	no
6744	MSTRG.3787.1	1	421	MSTRG.3787	.	3.20665	0.647753	0	0	3.93587	0.646952	9.61758	1.43523	12.8195	1.42497	0	0	0.821577	-0.283532	0.605168	0.79948	down	no
6746	MSTRG.3789.1	1	712	MSTRG.3789	.	0	0	0	0	3.49712	0.574834	11.4522	1.70901	0	0	0	0	0.947545	-0.0777339	0.635599	0.817481	down	no
6763	MSTRG.3785.1	1	239	MSTRG.3785	.	0	0	0	0	0	0	17.1046	2.55251	0	0	0	0	0.758447	-0.39888	0.122334	0.459939	down	no
6767	MSTRG.3794.1	1	2510	MSTRG.3794	.	5.60916	1.13307	0	0	6.32789	1.04014	10.6773	1.59337	0	0	12.1952	1.60312	0.932616	-0.100645	0.872389	0.944343	down	no
6768	MSTRG.3795.1	1	1327	MSTRG.3795	.	0	0	0	0	0	0	0	0	0	0	11.4175	1.50088	0.700553	-0.513434	0.344931	0.690493	down	no
6769	MSTRG.3796.1	1	1246	MSTRG.3796	IDNK	0	0	0	0	8.84751	1.4543	2.06019	0.307442	0	0	4.65409	0.611803	1.08263	0.114542	0.84596	0.932251	up	no
6773	MSTRG.3799.1	1	249	MSTRG.3799	.	7.98483	1.61296	0	0	11.795	1.93878	7.27161	1.08514	22.4132	2.49137	15.6961	2.06333	0.684919	-0.545994	0.446602	0.719252	down	no
6802	MSTRG.3801.1	1	892	MSTRG.3801	.	8.39462	1.69574	9.53587	1.1838	11.7892	1.93784	22.5	3.35767	17.2567	1.9182	13.9428	1.83285	0.827981	-0.27233	0.0544784	0.459939	down	no
6814	MSTRG.3809.1	1	4824	MSTRG.3809	.	0	0	0	0	0	0	6.03545	0.900668	0	0	0	0	0.869299	-0.202076	0.122334	0.459939	down	no
6815	MSTRG.3810.1	1	387	MSTRG.3810	.	19.5401	3.94715	62.5452	7.76446	37.2946	6.13024	21.0698	3.14423	67.6434	7.51902	49.2455	6.47356	0.971638	-0.0415087	0.886931	0.950512	down	no
6817	MSTRG.3812.1	1	818	MSTRG.3812	.	0	0	0	0	11.9951	1.97168	0	0	0	0	0	0	1.48001	0.56561	0.414641	0.718646	up	no
6819	MSTRG.3814.1	1	328	MSTRG.3814	.	0	0	3.19207	0.396269	8.74695	1.43777	0	0	0	0	0	0	1.52652	0.610243	0.254687	0.635348	up	no
6820	MSTRG.3815.1	1	2554	MSTRG.3815	.	0	0	0	0	0	0	8.3798	1.25051	0	0	0	0	0.837849	-0.255239	0.122334	0.459939	down	no
6842	MSTRG.3826.3	2	291	MSTRG.3826	UBAP1	5.85884	1.1835	4.692	0.582472	12.3695	2.03322	5.23515	0.781239	9.80756	1.09018	6.02618	0.792171	1.17118	0.227963	0.537126	0.756472	up	no
6843	MSTRG.3826.4	2	697	MSTRG.3826	UBAP1	9.36807	1.89238	12.4457	1.54502	21.4917	3.53267	18.9276	2.82456	17.0885	1.8995	14.3189	1.88228	1.06395	0.089428	0.743116	0.8786	up	no
6847	MSTRG.3831.1	1	239	MSTRG.3831	.	0.627615	0.12678	0	0	10.6151	1.74483	0	0	0	0	0	0	1.49677	0.581852	0.347701	0.692667	up	no
6849	MSTRG.3833.1	1	5746	MSTRG.3833	.	2.2936	0.463313	6.53394	0.811133	6.07101	0.997912	6.98538	1.04243	7.18865	0.799067	5.37774	0.70693	0.964231	-0.0525487	0.753711	0.88467	down	no
6852	MSTRG.3836.1	1	316	MSTRG.3836	.	0	0	11.8418	1.47005	8.60127	1.41382	0	0	0	0	0	0	1.81145	0.857148	0.187373	0.563176	up	no
6853	MSTRG.3837.1	1	1630	MSTRG.3837	.	4.87362	0.984486	3.68098	0.456963	7.65951	1.25902	8.57914	1.28026	12.2975	1.36695	6.88282	0.904781	0.876555	-0.190083	0.469162	0.719908	down	no
6854	MSTRG.3838.1	1	745	MSTRG.3838	.	2.81476	0.568591	4.00671	0.497399	9.50738	1.56276	8.21342	1.22569	0	0	7.83221	1.02958	1.17745	0.235667	0.602862	0.79827	up	no
6855	MSTRG.3839.1	1	401	MSTRG.3839	.	0	0	0	0	10.9202	1.79499	0	0	0	0	0	0	1.44771	0.533776	0.414641	0.718646	up	no
6858	MSTRG.3842.1	1	408	MSTRG.3842	.	3.67647	0.742658	0	0	2.22059	0.365006	9.99265	1.4912	0	0	3.30882	0.434961	0.95897	-0.0604422	0.843406	0.931161	down	no
6861	MSTRG.3858.1	1	293	MSTRG.3858	.	3.06143	0.618419	0	0	0	0	8.69966	1.29825	14.802	1.64535	9.66553	1.27058	0.485725	-1.04179	0.0343228	0.385298	down	yes
6872	MSTRG.3865.1	1	442	MSTRG.3865	.	0	0	8.1448	1.01111	4.73982	0.7791	0	0	14.7466	1.63918	0	0	1.04011	0.0567405	0.929281	0.969485	up	no
6873	MSTRG.3844.1	1	823	MSTRG.3844	.	0	0	0	0	0	0	11.2661	1.68124	0	0	0	0	0.806451	-0.310342	0.122334	0.459939	down	no
6876	MSTRG.3847.1	1	931	MSTRG.3847	.	7.15145	1.44461	0	0	0	0	0	0	0	0	0	0	1.34765	0.430449	0.456053	0.719252	up	no
6877	MSTRG.3848.1	1	2759	MSTRG.3848	.	0	0	7.28393	0.904238	0	0	10.0953	1.50652	0	0	5.04286	0.662909	0.818226	-0.28943	0.605024	0.799439	down	no
6878	MSTRG.3849.1	1	223	MSTRG.3849	.	0	0	0	0	8.80269	1.44693	0	0	0	0	0	0	1.38004	0.464708	0.414641	0.718646	up	no
6879	MSTRG.3850.1	1	316	MSTRG.3850	.	4.26266	0.86107	0	0	0	0	0	0	0	0	7.12025	0.935992	0.952034	-0.0709147	0.892456	0.953192	down	no
6880	MSTRG.3851.1	1	379	MSTRG.3851	.	0	0	0	0	9.95251	1.63593	0	0	0	0	0	0	1.4175	0.503347	0.414641	0.718646	up	no
6881	MSTRG.3852.1	1	560	MSTRG.3852	.	0	0	0	0	3.775	0.62051	4.58393	0.684058	16.6357	1.84917	0	0	0.703234	-0.507924	0.443986	0.719252	down	no
6882	MSTRG.3853.1	1	971	MSTRG.3853	.	8.30072	1.67677	0	0	0	0	0	0	9.2379	1.02686	0	0	1.05184	0.0729151	0.918261	0.96456	up	no
6883	MSTRG.3854.1	1	468	MSTRG.3854	.	1.92308	0.388467	0	0	8.62607	1.4179	9.35684	1.39632	0	0	0	0	1.26713	0.341563	0.332461	0.690493	up	no
6884	MSTRG.3856.1	1	1418	MSTRG.3856	.	2.00987	0.406	0	0	6.90832	1.13554	8.83427	1.31834	0	0	0	0	1.22563	0.293528	0.302425	0.683102	up	no
6885	MSTRG.3857.1	1	220	MSTRG.3857	.	6.71818	1.35709	0	0	0	0	0	0	0	0	0	0	1.33135	0.412893	0.456053	0.719252	up	no
6886	MSTRG.3855.1	1	474	MSTRG.3855	.	0	0	0	0	0	0	12.0591	1.79957	0	0	0	0	0.79889	-0.323931	0.122334	0.459939	down	no
6887	MSTRG.3867.1	1	4508	MSTRG.3867	.	5.69854	1.15112	10.872	1.34967	10.4945	1.72501	14.1105	2.1057	14.8929	1.65544	10.679	1.40381	0.910313	-0.135566	0.316258	0.690493	down	no
6888	MSTRG.3868.1	1	1814	MSTRG.3868	.	0	0	0	0	4.88864	0.803563	12.7277	1.89935	0	0	8.22161	1.08077	0.737597	-0.439095	0.37551	0.716021	down	no
6889	MSTRG.3869.1	1	695	MSTRG.3869	.	0	0	3.45324	0.42869	9.27338	1.5243	4.7223	0.704707	11.6978	1.30029	0	0	0.998317	-0.0024304	0.997034	0.998821	down	no
6896	MSTRG.3871.1	1	302	MSTRG.3871	.	6.93377	1.40064	8.03311	0.997243	11.3278	1.86199	17.4073	2.59768	24.202	2.69021	21.7185	2.85501	0.64763	-0.626758	0.0388182	0.405878	down	no
6904	MSTRG.3873.1	1	388	MSTRG.3873	.	15.6907	3.16957	0	0	30.2474	4.97187	23.6134	3.52382	0	0	18.7577	2.4658	1.36083	0.444489	0.678373	0.842468	up	no
6906	MSTRG.3883.1	1	382	MSTRG.3883	.	0	0	0	0	8.30105	1.36447	0	0	0	0	0	0	1.36311	0.446907	0.414641	0.718646	up	no
6907	MSTRG.3884.1	1	767	MSTRG.3884	.	2.77314	0.560183	0	0	0	0	7.85398	1.17205	0	0	10.4407	1.37248	0.700381	-0.513788	0.370506	0.712174	down	no
6928	MSTRG.3893.1	2	252	MSTRG.3893	TOPORS	5.94048	1.19999	18.9722	2.35524	3.4927	0.574107	9.5873	1.43071	10.0833	1.12083	13.0833	1.71987	0.922257	-0.116759	0.778933	0.898899	down	no
6930	MSTRG.3895.1	1	1301	MSTRG.3895	.	0	0	0	0	0	0	0	0	5.58938	0.621297	0	0	0.826777	-0.27443	0.327684	0.690493	down	no
6937	MSTRG.3897.1	1	257	MSTRG.3897	.	1.16732	0.235801	0	0	0	0	9.40078	1.40287	0	0	0	0	0.886444	-0.173898	0.392876	0.718646	down	no
6938	MSTRG.3899.1	1	331	MSTRG.3899	.	0	0	0	0	0.912387	0.149972	9.12387	1.36155	0.906344	0.100746	0	0	0.839536	-0.252336	0.0664054	0.459939	down	no
6940	MSTRG.3901.1	1	390	MSTRG.3901	.	6.67692	1.34876	0	0	6.17949	1.01574	0	0	0	0	0	0	1.71146	0.775227	0.17323	0.544882	up	no
6941	MSTRG.3902.1	1	272	MSTRG.3902	.	0	0	0	0	0	0	9.92647	1.48132	0	0	0	0	0.820196	-0.28596	0.122334	0.459939	down	no
6942	MSTRG.3903.1	1	210	MSTRG.3903	.	7.14286	1.44288	0	0	6.47143	1.06373	0	0	0	0	0	0	1.7488	0.806365	0.173948	0.545806	up	no
6956	MSTRG.3905.1	1	359	MSTRG.3905	.	0.835655	0.168805	0.835655	0.103739	8.41226	1.38275	0	0	0	0	0	0	1.48414	0.569628	0.256603	0.637576	up	no
6959	MSTRG.3908.1	1	2084	MSTRG.3908	.	0	0	10.5907	1.31474	9.26823	1.52345	8.17658	1.22019	0	0	7.12092	0.93608	1.17324	0.230499	0.722575	0.867627	up	no
6960	MSTRG.3909.1	1	307	MSTRG.3909	.	0	0	0	0	0	0	9.83713	1.46799	0	0	0	0	0.82116	-0.284265	0.122334	0.459939	down	no
6962	MSTRG.3917.1	3	4211	MSTRG.3917	.	6.2683	1.26622	13.988	1.73649	10.027	1.64818	11.4205	1.70428	9.81459	1.09096	9.89851	1.30121	1.10628	0.145722	0.299693	0.68114	up	no
6964	MSTRG.3918.1	2	7466	MSTRG.3918	.	18.815	3.80069	30.787	3.82194	26.7327	4.39414	46.2611	6.90353	51.1841	5.68946	42.0312	5.5252	0.729652	-0.45472	0.00222138	0.157148	down	no
6965	MSTRG.3918.2	3	807	MSTRG.3918	.	0.538808	0.108841	0.789479	0.098007	0.458622	0.075385	2.27909	0.340108	5.06397	0.562894	3.34775	0.440078	0.746812	-0.421183	0.00190999	0.149591	down	no
6966	MSTRG.3918.3	3	4248	MSTRG.3918	.	20.9574	4.23346	34.8751	4.32945	28.0241	4.60641	46.4309	6.92886	55.7168	6.1933	43.2434	5.68456	0.755415	-0.404659	0.00299988	0.171427	down	no
6967	MSTRG.3918.4	3	2275	MSTRG.3918	.	0	0	0.512297	0.063597	8.84224	1.45343	3.03046	0.452235	0.790611	0.087882	0	0	1.25535	0.328091	0.512083	0.740304	up	no
6968	MSTRG.3918.5	3	1008	MSTRG.3918	.	20.1396	4.06827	36.5561	4.53812	31.1203	5.11535	47.1072	7.02979	55.4247	6.16082	45.3049	5.95556	0.767543	-0.38168	0.0204088	0.313067	down	no
6975	MSTRG.3920.1	1	270	MSTRG.3920	.	1.11111	0.224448	0.555556	0.068968	0	0	11.1704	1.66695	0	0	0	0	0.881673	-0.181685	0.428796	0.719252	down	no
6983	MSTRG.3911.1	1	224	MSTRG.3911	MAP3K8	0	0	4.26914	0.529977	0	0	0	0	0	0	9.375	1.23239	0.83397	-0.261933	0.593652	0.792893	down	no
6984	MSTRG.3912.1	1	858	MSTRG.3912	MAP3K8	6.93124	1.40013	0	0	0	0	0	0	0	0	0	0	1.33942	0.421606	0.456053	0.719252	up	no
6986	MSTRG.3914.1	1	603	MSTRG.3914	MAP3K8	0	0	0	0	0	0	15.864	2.36738	0	0	0	0	0.767352	-0.382039	0.122334	0.459939	down	no
6992	MSTRG.3915.1	1	241	MSTRG.3915	.	2.89627	0.585055	5.51867	0.685096	0	0	3.13278	0.467504	15.4108	1.71301	3.73444	0.49091	0.727569	-0.458845	0.299979	0.681305	down	no
7004	MSTRG.3922.1	1	201	MSTRG.3922	.	0	0	0	0	0	0	10.5174	1.56951	0	0	0	0	0.813972	-0.296949	0.122334	0.459939	down	no
7005	MSTRG.3923.1	1	3334	MSTRG.3923	.	0	0	33.379	4.14372	22.8026	3.74815	21.9807	3.28016	27.8197	3.09235	22.0708	2.90131	0.713169	-0.487684	0.626671	0.812441	down	no
7011	MSTRG.3926.1	1	228	MSTRG.3926	.	0	0	0	0	0	0	9.27193	1.38365	1.97368	0.219388	0	0	0.765265	-0.385968	0.0898087	0.459939	down	no
7021	MSTRG.3928.1	1	321	MSTRG.3928	.	64.9284	13.1157	135.994	16.8825	75.514	12.4125	77.3863	11.5483	109.935	12.22	89.081	11.7101	1.15748	0.210987	0.234101	0.612797	up	no
7026	MSTRG.3934.1	1	401	MSTRG.3934	EPC1	0	0	0	0	0	0	10.5436	1.57342	0	0	0	0	0.813702	-0.297428	0.122334	0.459939	down	no
7027	MSTRG.3935.1	1	870	MSTRG.3935	EPC1	2.41379	0.487594	0	0	0	0	9.33333	1.39281	0	0	3.32468	0.437046	0.81996	-0.286374	0.405098	0.718646	down	no
7029	MSTRG.3937.1	1	310	MSTRG.3937	EPC1	0	0	0	0	0	0	12.6645	1.88992	0	0	0	0	0.793375	-0.333926	0.122334	0.459939	down	no
7030	MSTRG.3938.1	1	851	MSTRG.3938	EPC1	0	0	0	0	5.2644	0.865327	6.74266	1.0062	13.074	1.45327	0	0	0.755252	-0.404971	0.509796	0.739222	down	no
7032	MSTRG.3940.1	1	3052	MSTRG.3940	EPC1	0	0	0	0	5.52392	0.907986	8.06815	1.20401	13.7706	1.5307	0	0	0.736898	-0.440464	0.48756	0.724625	down	no
7033	MSTRG.3941.1	1	1290	MSTRG.3941	EPC1	0.84053	0.16979	0	0	0	0	9.36046	1.39686	0	0	0	0	0.870826	-0.199544	0.288858	0.671266	down	no
7034	MSTRG.3942.1	1	5391	MSTRG.3942	EPC1	3.5542	0.717959	0	0	0	0	13.0631	1.9494	8.45501	0.939832	1.83154	0.240764	0.670409	-0.576886	0.236679	0.615249	down	no
7035	MSTRG.3943.1	1	2981	MSTRG.3943	EPC1	0	0	4.80007	0.595888	0	0	4.15364	0.619846	0	0	0	0	1.03868	0.0547518	0.875053	0.945414	up	no
7039	MSTRG.3946.1	1	348	MSTRG.3946	.	2.15517	0.435351	19.5517	2.42718	0	0	15.569	2.32335	5.89081	0.654803	1.72414	0.226646	0.959183	-0.0601221	0.940063	0.973878	down	no
7040	MSTRG.3947.1	1	417	MSTRG.3947	.	0	0	0	0	13	2.13685	0.36211	0.054038	0	0	1.43885	0.189144	1.39485	0.48011	0.506461	0.736725	up	no
7041	MSTRG.3948.1	1	341	MSTRG.3948	.	0	0	0	0	0	0	10.6276	1.58595	0	0	0	0	0.812841	-0.298955	0.122334	0.459939	down	no
7043	MSTRG.3950.1	1	618	MSTRG.3950	.	2.18447	0.441269	0	0	9.50647	1.56261	0	0	0	0	0	0	1.58525	0.664715	0.234475	0.613104	up	no
7050	MSTRG.3952.1	1	415	MSTRG.3952	.	7.55422	1.52598	0	0	0	0	0	0	0	0	0	0	1.36246	0.446215	0.456053	0.719252	up	no
7053	MSTRG.3957.1	5	1019	MSTRG.3957	.	7.37193	1.48915	24.0734	2.9885	11.9097	1.95764	3.25841	0.486252	6.95289	0.772861	5.83176	0.766613	1.79615	0.844905	0.0292659	0.361267	up	no
7055	MSTRG.3959.1	3	2514	MSTRG.3959	.	7.04415	1.42294	22.1213	2.74617	10.0684	1.65498	6.78162	1.01202	6.16391	0.68516	2.89592	0.380683	1.76508	0.819735	0.0565726	0.459939	up	no
7062	MSTRG.3964.1	1	229	MSTRG.3964	.	0.655022	0.132316	2.62009	0.325262	0	0	9.89083	1.47601	0	0	0	0	0.932372	-0.101023	0.729666	0.871471	down	no
7063	MSTRG.3965.1	1	634	MSTRG.3965	.	3.78549	0.76468	12.776	1.58604	6.60252	1.08528	11.4132	1.7032	9.22713	1.02566	0	0	1.28445	0.36115	0.465269	0.719908	up	no
7067	MSTRG.3968.1	1	279	MSTRG.3968	.	0	0	4.30107	0.533942	1.08244	0.177924	10.7312	1.60141	1.07527	0.119523	2.68817	0.353373	0.834873	-0.260372	0.449494	0.719252	down	no
7081	MSTRG.3974.1	1	806	MSTRG.3974	.	3.70844	0.749116	11.1042	1.37849	7.86849	1.29337	0	0	13.3945	1.48889	11.103	1.45954	1.04331	0.0611737	0.778147	0.89844	up	no
7084	MSTRG.3975.1	1	653	MSTRG.3975	.	0	0	0	0	0	0	9.24043	1.37895	0	0	0	0	0.827768	-0.272702	0.122334	0.459939	down	no
7085	MSTRG.3976.1	1	358	MSTRG.3976	.	8.79888	1.7774	11.3128	1.40439	14.0223	2.3049	0	0	11.601	1.28953	0	0	2.04187	1.02989	0.107058	0.459939	up	no
7086	MSTRG.3977.1	1	1054	MSTRG.3977	.	6.33112	1.27891	0	0	0	0	15.4213	2.30131	0	0	0	0	1.01455	0.0208448	0.969029	0.986816	up	no
7088	MSTRG.3979.1	1	1788	MSTRG.3979	.	5.76846	1.16525	10.8619	1.34841	8.52629	1.40149	6.16331	0.919749	14.3775	1.59816	9.72315	1.27816	0.996912	-0.0044617	0.964285	0.984497	down	no
7089	MSTRG.3980.1	1	482	MSTRG.3980	.	0	0	0	0	0	0	11.5913	1.72976	0	0	0	0	0.803302	-0.315986	0.122334	0.459939	down	no
7090	MSTRG.3981.1	1	511	MSTRG.3981	.	7.82779	1.58124	0	0	0	0	5.90998	0.881944	0	0	0	0	1.19555	0.257675	0.666799	0.835755	up	no
7091	MSTRG.3982.1	1	281	MSTRG.3982	.	6.40569	1.29397	8.54092	1.06028	0	0	0	0	14.1637	1.57439	14.9466	1.96481	0.744022	-0.426584	0.298241	0.679727	down	no
7092	MSTRG.3983.1	1	872	MSTRG.3983	.	0	0	12.5631	1.5596	7.08945	1.16532	0	0	6.32798	0.703398	0	0	1.42798	0.513976	0.41705	0.719252	up	no
7097	MSTRG.3988.1	1	1315	MSTRG.3988	.	0	0	0	0	0	0	7.00456	1.04529	11.9452	1.3278	5.37995	0.707221	0.498414	-1.00458	0.00703111	0.215908	down	yes
7098	MSTRG.3989.1	1	286	MSTRG.3989	.	0	0	0	0	0	0	10.0315	1.49699	0	0	0	0	0.81907	-0.287941	0.122334	0.459939	down	no
7099	MSTRG.3990.1	1	328	MSTRG.3990	.	0	0	0	0	0	0	10.1128	1.50913	0	0	0	0	0.818205	-0.289466	0.122334	0.459939	down	no
7100	MSTRG.3991.1	1	319	MSTRG.3991	.	0	0	0	0	10.721	1.76225	0	0	0	0	0	0	1.44159	0.527657	0.414641	0.718646	up	no
7101	MSTRG.3992.1	1	262	MSTRG.3992	.	0	0	0	0	0	0	9.22138	1.3761	0	0	0	0	0.827984	-0.272325	0.122334	0.459939	down	no
7112	MSTRG.3995.1	1	225	MSTRG.3995	.	0	0	0	0	2.66222	0.437598	9.27111	1.38352	0	0	0	0	0.942911	-0.0848059	0.510891	0.739788	down	no
7119	MSTRG.3997.1	1	233	MSTRG.3997	.	0	0	14.1459	1.7561	0	0	0	0	0	0	9.65665	1.26941	0.992332	-0.0111056	0.987457	0.994785	down	no
7123	MSTRG.4001.1	1	4792	MSTRG.4001	.	5.88251	1.18829	2.4246	0.300993	8.26356	1.35831	5.15317	0.769006	0	0	8.49111	1.1162	1.26536	0.339549	0.512098	0.740304	up	no
7124	MSTRG.4002.1	1	3273	MSTRG.4002	.	5.40911	1.09266	7.707	0.956758	8.75283	1.43873	0	0	10.8246	1.20323	7.49649	0.98545	1.2162	0.282382	0.284448	0.666608	up	no
7128	MSTRG.4005.1	1	385	MSTRG.4005	NMT2	0	0	0	0	0	0	25.1013	3.74586	0	0	0	0	0.71202	-0.49001	0.122334	0.459939	down	no
7154	MSTRG.4015.1	1	708	MSTRG.4015	.	3.46045	0.699022	14.8658	1.84546	4.25989	0.700212	0	0	0.841808	0.093573	1.69491	0.222805	1.77699	0.829438	0.0550919	0.459939	up	no
7158	MSTRG.4016.1	1	268	MSTRG.4016	.	0	0	7.79105	0.967192	1.12687	0.185227	0	0	12.8731	1.43094	4.47761	0.588604	0.77029	-0.376527	0.346825	0.692188	down	no
7159	MSTRG.4017.1	1	1089	MSTRG.4017	.	3.58494	0.724169	13.0735	1.62296	0	0	5.40312	0.806306	6.59412	0.732981	0	0	1.14081	0.190057	0.76091	0.888672	up	no
7160	MSTRG.4018.1	1	275	MSTRG.4018	.	0	0	10.9091	1.35427	10.9309	1.79675	0	0	6	0.66694	6.81455	0.895805	1.20074	0.26393	0.669686	0.837407	up	no
7162	MSTRG.4020.1	1	536	MSTRG.4020	.	2.51866	0.508776	0	0	5.00638	0.822916	0	0	10.5008	1.16723	11.6978	1.53773	0.731537	-0.450997	0.363887	0.707421	down	no
7164	MSTRG.4022.1	1	227	MSTRG.4022	.	3.30396	0.667411	11.8943	1.47657	1.3304	0.218682	0	0	0	0	0	0	1.68131	0.749588	0.111426	0.459939	up	no
7166	MSTRG.4024.1	1	872	MSTRG.4024	.	6.40596	1.29402	11.7248	1.45553	3.11697	0.512347	0	0	9.51147	1.05726	4.12844	0.542704	1.28258	0.359054	0.199004	0.574862	up	no
7167	MSTRG.4025.1	1	527	MSTRG.4025	.	0	0	0	0	10.6015	1.74261	0	0	0	0	0	0	1.43789	0.523951	0.414641	0.718646	up	no
7176	MSTRG.4034.1	1	263	MSTRG.4034	MPP7	0.570342	0.115211	1.14068	0.141606	0	0	11.3156	1.68862	0	0	0.570342	0.074974	0.846347	-0.240679	0.324343	0.690493	down	no
7179	MSTRG.4035.1	1	236	MSTRG.4035	.	47.7034	9.63623	146.534	18.1909	69.4703	11.4191	33.0212	4.92774	108.436	12.0534	57.7797	7.59542	1.44214	0.528214	0.18644	0.563163	up	no
7183	MSTRG.4037.1	1	5387	MSTRG.4037	.	3.85632	0.778989	0	0	7.34045	1.20657	6.49879	0.969813	7.0039	0.77853	4.28067	0.562716	0.931765	-0.101962	0.800547	0.909627	down	no
7187	MSTRG.4041.1	1	284	MSTRG.4041	.	0	0	1.55883	0.193515	0	0	6.38028	0.952127	13.0704	1.45287	0	0	0.640875	-0.641885	0.255979	0.636882	down	no
7188	MSTRG.4042.1	1	228	MSTRG.4042	.	0	0	0	0	0	0	10.7719	1.60749	0	0	0	0	0.811371	-0.301566	0.122334	0.459939	down	no
7189	MSTRG.4043.1	1	239	MSTRG.4043	.	0	0	0	0	0	0	17.4351	2.60184	0	0	0	0	0.756169	-0.403219	0.122334	0.459939	down	no
7190	MSTRG.4045.1	1	350	MSTRG.4045	.	5.55429	1.12198	0	0	0	0	12.9429	1.93146	7.26857	0.807951	0	0	0.80528	-0.312438	0.597678	0.794902	down	no
7192	MSTRG.4047.1	1	1261	MSTRG.4047	.	0	0	0	0	0	0	10.8945	1.62579	0	0	3.5686	0.469109	0.697749	-0.519221	0.0899336	0.459939	down	no
7194	MSTRG.4044.1	1	262	MSTRG.4044	.	0	0	0	0	9.22138	1.51575	0	0	0	0	0	0	1.39389	0.479113	0.414641	0.718646	up	no
7218	MSTRG.4068.1	1	883	MSTRG.4068	ENSSSCG00000011062	0	0	0	0	0	0	9.06342	1.35253	0	0	0	0	0.829786	-0.269188	0.122334	0.459939	down	no
7220	MSTRG.4070.1	1	1304	MSTRG.4070	ENSSSCG00000011062	0	0	0	0	0	0	9.5023	1.41803	0	0	6.51457	0.856372	0.648719	-0.624335	0.133802	0.482255	down	no
7221	MSTRG.4071.1	1	1159	MSTRG.4071	ENSSSCG00000011062	0	0	7.34968	0.9124	6.58067	1.08169	0	0	13.9525	1.55092	0	0	1.09839	0.135394	0.837348	0.928391	up	no
7223	MSTRG.4073.1	1	268	MSTRG.4073	ENSSSCG00000011062	6.71642	1.35674	0	0	0	0	0	0	0	0	0	0	1.33129	0.41282	0.456053	0.719252	up	no
7224	MSTRG.4074.1	1	221	MSTRG.4074	ENSSSCG00000011062	0	0	0	0	10.2489	1.68464	0	0	0	0	0	0	1.42687	0.512857	0.414641	0.718646	up	no
7225	MSTRG.4075.1	1	293	MSTRG.4075	ENSSSCG00000011062	2.55973	0.517073	0	0	2.9727	0.488632	0	0	0	0	0	0	1.32622	0.407318	0.166923	0.536996	up	no
7226	MSTRG.4076.1	1	274	MSTRG.4076	ENSSSCG00000011062	1.64234	0.331757	3.27372	0.406405	0	0	11.562	1.7254	0	0	2.18978	0.287857	0.889742	-0.168541	0.631629	0.815002	down	no
7227	MSTRG.4077.1	1	215	MSTRG.4077	ENSSSCG00000011062	0	0	0	0	0	0	9.13023	1.3625	0	0	0	0	0.829021	-0.270519	0.122334	0.459939	down	no
7230	MSTRG.4067.4	2	1389	MSTRG.4067	ENSSSCG00000011062	5.86925	1.18561	15.0347	1.86643	10.041	1.65048	8.4236	1.25705	11.7768	1.30907	7.47828	0.983057	1.17536	0.233107	0.235023	0.613709	up	no
7234	MSTRG.4061.1	1	802	MSTRG.4061	ENSSSCG00000011061	6.9601	1.40596	0	0	0	0	3.55638	0.530717	0	0	0	0	1.22163	0.288812	0.602886	0.79827	up	no
7237	MSTRG.4064.1	1	269	MSTRG.4064	ENSSSCG00000024127	0	0	0	0	0	0	18.5019	2.76103	0	0	0	0	0.749071	-0.416827	0.122334	0.459939	down	no
7238	MSTRG.4059.1	1	205	MSTRG.4059	.	0	0	0	0	11.0488	1.81613	9.57561	1.42897	0	0	6.58537	0.865679	0.938958	-0.0908677	0.885278	0.949878	down	no
7245	MSTRG.4066.1	1	256	MSTRG.4066	.	548.156	110.729	851.539	105.711	715.227	117.564	936.582	139.766	852.496	94.7607	698.109	91.7699	1.09398	0.129586	0.0122537	0.25865	up	no
7246	MSTRG.4078.1	1	560	MSTRG.4078	.	0	0	0	0	0	0	10.2464	1.52907	0	0	0	0	0.816793	-0.291957	0.122334	0.459939	down	no
7248	MSTRG.4080.1	1	314	MSTRG.4080	.	0	0	0	0	0	0	0	0	12.6752	1.40893	0	0	0.707451	-0.499298	0.327684	0.690493	down	no
7260	MSTRG.4091.1	2	2036	MSTRG.4091	.	0.041321	0.008347	0.680947	0.084534	4.48326	0.736928	13.9936	2.08826	2.43373	0.270526	6.37189	0.837616	0.70465	-0.505021	0.159289	0.525654	down	no
7261	MSTRG.4091.2	2	1648	MSTRG.4091	.	4.27468	0.863499	3.19357	0.396454	0	0	0.177277	0.026455	13.5939	1.51106	0.156705	0.0206	0.93612	-0.0952341	0.864267	0.940748	down	no
7262	MSTRG.4092.1	1	474	MSTRG.4092	.	0	0	0	0	16.2996	2.67922	20.6646	3.08376	14.7384	1.63827	9.79958	1.2882	0.582042	-0.780805	0.321484	0.690493	down	no
7288	MSTRG.4090.1	1	215	MSTRG.4090	MSRB2	0	0	2.7907	0.346441	12.6419	2.07799	0	0	0	0	15.2651	2.00667	1.0708	0.0986872	0.912074	0.962097	up	no
7292	MSTRG.4096.1	1	1192	MSTRG.4096	PIP4K2A	0	0	1.59899	0.198501	0	0	6.33389	0.945204	0	0	6.39178	0.84023	0.721476	-0.470976	0.246986	0.626423	down	no
7295	MSTRG.4099.1	1	249	MSTRG.4099	PIP4K2A	0	0	0	0	0	0	12.1285	1.80993	0	0	0	0	0.798247	-0.325094	0.122334	0.459939	down	no
7298	MSTRG.4094.1	1	753	MSTRG.4094	.	0	0	0	0	0	0	9.59628	1.43205	0	0	0	0	0.823792	-0.279649	0.122334	0.459939	down	no
7300	MSTRG.4102.1	1	223	MSTRG.4102	SPAG6	0	0	0	0	4.72646	0.776904	12.8655	1.91991	0	0	0.672646	0.088423	0.942074	-0.086088	0.703238	0.856941	down	no
7310	MSTRG.4104.1	1	222	MSTRG.4104	.	0	0	0	0	2.72072	0.447214	0	0	12.8378	1.42701	0	0	0.805757	-0.311583	0.578163	0.782324	down	no
7311	MSTRG.4106.1	1	306	MSTRG.4106	.	0	0	0	0	0	0	0.986928	0.147279	0	0	11.9444	1.57016	0.672698	-0.57197	0.309215	0.690493	down	no
7312	MSTRG.4107.1	1	2047	MSTRG.4107	.	4.81094	0.971825	0	0	0	0	9.40352	1.40328	0	0	0	0	1.03602	0.0510466	0.907104	0.959992	up	no
7313	MSTRG.4108.1	1	442	MSTRG.4108	.	0	0	0	0	0	0	9.87557	1.47373	0	0	4.66516	0.613258	0.681659	-0.552877	0.10878	0.459939	down	no
7314	MSTRG.4109.1	1	677	MSTRG.4109	.	0	0	0	0	0	0	9.53176	1.42242	0	0	0	0	0.824505	-0.2784	0.122334	0.459939	down	no
7317	MSTRG.4112.1	1	1019	MSTRG.4112	.	0	0	0	0	4.42296	0.727018	12.4475	1.85753	0	0	5.29637	0.696234	0.78862	-0.342598	0.36745	0.709952	down	no
7318	MSTRG.4113.1	1	605	MSTRG.4113	.	0	0	5.2552	0.652389	0	0	12.4793	1.86229	0	0	7.6368	1.00389	0.707918	-0.498346	0.388842	0.718646	down	no
7319	MSTRG.4114.1	1	465	MSTRG.4114	.	0	0	9.22151	1.14477	8.5785	1.41008	0	0	0	0	6.6194	0.870152	1.35972	0.443305	0.490619	0.726844	up	no
7321	MSTRG.4116.1	1	839	MSTRG.4116	.	0	0	0	0	0	0	8.10489	1.20949	3.14025	0.34906	0	0	0.74769	-0.419487	0.104214	0.459939	down	no
7335	MSTRG.4119.1	1	1009	MSTRG.4119	.	0	0	0	0	0	0	0	0	0	0	8.80178	1.15704	0.74196	-0.430587	0.344931	0.690493	down	no
7336	MSTRG.4120.1	1	457	MSTRG.4120	.	0	0	0	0	10.1772	1.67287	0	0	0	0	0	0	1.42462	0.510574	0.414641	0.718646	up	no
7337	MSTRG.4121.1	1	436	MSTRG.4121	.	2.06422	0.416979	0	0	7.61927	1.2524	0	0	0	0	0	0	1.50475	0.589523	0.222739	0.600353	up	no
7338	MSTRG.4122.1	1	1814	MSTRG.4122	.	3.26792	0.660129	0	0	0	0	8.65215	1.29116	0	0	0	0	0.988439	-0.0167765	0.960164	0.982555	down	no
7339	MSTRG.4123.1	1	2026	MSTRG.4123	.	0	0	0	0	0	0	0	0	0	0	10.5005	1.38034	0.714119	-0.485763	0.344931	0.690493	down	no
7340	MSTRG.4124.1	1	379	MSTRG.4124	.	0	0	1.97098	0.24468	2.7206	0.447194	0	0	3.46267	0.384899	0	0	1.07455	0.103734	0.7032	0.856915	up	no
7341	MSTRG.4125.1	1	217	MSTRG.4125	.	0	0	0	0	0	0	9.74194	1.45379	0	0	0	0	0.822195	-0.282448	0.122334	0.459939	down	no
7344	MSTRG.4129.1	1	555	MSTRG.4129	.	0	0	7.16757	0.889793	0	0	0	0	16.0486	1.78391	0	0	0.812109	-0.300255	0.633955	0.816494	down	no
7349	MSTRG.4133.1	1	342	MSTRG.4133	.	1.31579	0.265793	2.19298	0.27224	0	0	9.71345	1.44953	0	0	0	0	0.957922	-0.0620206	0.822353	0.920697	down	no
7350	MSTRG.4135.1	1	204	MSTRG.4135	.	0	0	0	0	0	0	9.62255	1.43597	0	0	0	0	0.823502	-0.280155	0.122334	0.459939	down	no
7352	MSTRG.4138.1	1	824	MSTRG.4138	NEBL	0	0	11.5728	1.43667	0	0	0	0	3.45874	0.384462	0	0	1.15569	0.208753	0.700689	0.855495	up	no
7356	MSTRG.4136.1	1	467	MSTRG.4136	.	3.85439	0.778598	0	0	0	0	12.8822	1.92241	0	0	11.1863	1.47049	0.67514	-0.566742	0.37711	0.717562	down	no
7365	MSTRG.4142.1	1	249	MSTRG.4142	.	3.61446	0.730132	5.42169	0.673056	7.58032	1.246	5.45783	0.81447	0	0	15.6627	2.05893	1.07018	0.097854	0.873386	0.944832	up	no
7380	MSTRG.4145.1	1	206	MSTRG.4145	.	2.91262	0.588358	0	0	11.3786	1.87035	0	0	0	0	1.45631	0.191439	1.5936	0.672292	0.285363	0.667726	up	no
7381	MSTRG.4146.1	1	301	MSTRG.4146	.	25.2957	5.1098	30.5183	3.78858	35.2458	5.79348	15.8671	2.36784	12.7243	1.41439	9.39867	1.2355	2.33802	1.22529	0.00225008	0.158253	up	yes
7383	MSTRG.4151.1	1	705	MSTRG.4151	.	1.2766	0.257876	0	0	8.75887	1.43972	0	0	0	0	4.25532	0.559382	1.25249	0.324799	0.574623	0.78007	up	no
7385	MSTRG.4153.1	1	267	MSTRG.4153	.	0	0	0	0	8.40824	1.38209	1.13109	0.168792	0	0	15.0562	1.97921	0.86467	-0.209778	0.798247	0.908503	down	no
7387	MSTRG.4150.1	1	692	MSTRG.4150	.	8.4422	1.70535	0	0	0	0	0	0	0	0	0	0	1.39402	0.479251	0.456053	0.719252	up	no
7400	MSTRG.4158.1	1	459	MSTRG.4158	.	0	0	0	0	0	0	12.5011	1.86553	0	0	0	0	0.794843	-0.331259	0.122334	0.459939	down	no
7402	MSTRG.4160.1	1	305	MSTRG.4160	.	0	0	2.95082	0.366319	13.3672	2.19721	0	0	0.983607	0.109335	2.94098	0.386607	1.41372	0.499493	0.47283	0.719908	up	no
7403	MSTRG.4161.1	1	733	MSTRG.4161	.	0	0	0	0	0	0	11.0859	1.65435	5.36018	0.595821	0	0	0.672401	-0.572606	0.117175	0.459939	down	no
7408	MSTRG.4168.1	2	842	MSTRG.4168	.	6.39549	1.29191	8.46782	1.05121	10.2746	1.68887	9.64675	1.43958	4.49231	0.499351	10.2157	1.3429	1.18341	0.242953	0.371286	0.712822	up	no
7415	MSTRG.4171.1	1	214	MSTRG.4171	CREM	0	0	0	0	0	0	9.20093	1.37305	0	0	0	0	0.828216	-0.271921	0.122334	0.459939	down	no
7416	MSTRG.4172.1	1	267	MSTRG.4172	CREM	6.8427	1.38225	0	0	0	0	0	0	0	0	0	0	1.33608	0.418004	0.456053	0.719252	up	no
7421	MSTRG.4164.1	1	269	MSTRG.4164	.	1.11524	0.225282	0	0	9.54275	1.56858	0	0	0	0	0	0	1.50289	0.587741	0.299985	0.681305	up	no
7424	MSTRG.4165.1	1	365	MSTRG.4165	.	8.04384	1.62488	11.3644	1.41079	9.10137	1.49602	11.1699	1.66687	13.4904	1.49955	7.66575	1.0077	1.07863	0.109197	0.417094	0.719252	up	no
7426	MSTRG.4173.1	1	384	MSTRG.4173	.	4.51818	0.912686	0	0	0	0	22.4062	3.34368	0	0	0	0	0.901338	-0.149859	0.746249	0.880449	down	no
7427	MSTRG.4174.1	1	758	MSTRG.4174	.	0	0	0	0	0	0	10.7269	1.60077	0	0	0	0	0.811828	-0.300754	0.122334	0.459939	down	no
7429	MSTRG.4176.1	1	1545	MSTRG.4176	.	0	0	0	0	0	0	0	0	12.9463	1.43907	5.77605	0.75929	0.565352	-0.822779	0.0206828	0.314886	down	no
7430	MSTRG.4177.1	1	925	MSTRG.4177	.	4.15135	0.838586	0	0	0	0	10.2843	1.53473	0	0	4.37189	0.574707	0.838723	-0.253734	0.584415	0.786389	down	no
7433	MSTRG.4180.1	1	1523	MSTRG.4180	.	0	0	0	0	0	0	0	0	12.8956	1.43343	0	0	0.704638	-0.505046	0.327684	0.690493	down	no
7434	MSTRG.4181.1	1	230	MSTRG.4181	.	0	0	0	0	0	0	9.6913	1.44623	0	0	0	0	0.822748	-0.281478	0.122334	0.459939	down	no
7435	MSTRG.4182.1	1	207	MSTRG.4182	.	3.62319	0.731895	6.52174	0.809618	2.91304	0.478827	2.91787	0.435433	12.8019	1.42302	1.44928	0.190514	1.01093	0.0156842	0.967322	0.985862	up	no
7444	MSTRG.4186.1	1	255	MSTRG.4186	.	0	0	1.76471	0.219073	0.592157	0.097335	1.18431	0.176735	17.0471	1.89489	7.05882	0.927917	0.540812	-0.8868	0.0247182	0.337247	down	no
7452	MSTRG.4187.1	1	1084	MSTRG.4187	.	7.73801	1.5631	0	0	8.05627	1.32424	11.2795	1.68324	13.1061	1.45683	5.4059	0.710633	0.85232	-0.230532	0.674603	0.840496	down	no
7457	MSTRG.4194.1	1	293	MSTRG.4194	.	0.511945	0.103414	0	0	0	0	10.3072	1.53814	0	0	0	0	0.84341	-0.245694	0.193927	0.568871	down	no
7461	MSTRG.4196.2	3	422	MSTRG.4196	.	0.799182	0.161437	15.7067	1.94985	1.2076	0.198498	1.73716	0.259235	0.55328	0.061501	0.591653	0.077776	1.40997	0.495668	0.414531	0.718646	up	no
7471	MSTRG.4200.1	1	445	MSTRG.4200	.	6.74157	1.36182	0	0	5.76854	0.948195	6.75056	1.00738	0	0	0	0	1.45491	0.540931	0.233666	0.612409	up	no
7479	MSTRG.4202.1	1	234	MSTRG.4202	.	5.70513	1.15245	3.82051	0.474284	0.628205	0.10326	15.2991	2.28309	0	0	0	0	1.16282	0.217634	0.645844	0.823611	up	no
7487	MSTRG.4208.1	1	338	MSTRG.4208	.	3.5503	0.717171	6.21302	0.771293	9.8284	1.61553	0	0	0	0	3.99408	0.525042	1.71224	0.775885	0.0968639	0.459939	up	no
7489	MSTRG.4210.1	1	981	MSTRG.4210	.	2.75229	0.555972	0	0	3.07238	0.505017	9.84608	1.46933	0	0	0	0	1.10249	0.140759	0.405715	0.718646	up	no
7490	MSTRG.4211.1	1	3289	MSTRG.4211	.	3.10125	0.626461	0	0	0	0	0	0	5.85436	0.650752	5.23837	0.688609	0.78792	-0.343879	0.315609	0.690493	down	no
7491	MSTRG.4212.1	1	534	MSTRG.4212	.	1.12359	0.22697	0	0	0	0	9.33146	1.39253	0	0	0	0	0.885157	-0.175994	0.380353	0.718646	down	no
7494	MSTRG.4215.1	1	255	MSTRG.4215	.	0	0	0	0	0	0	0	0	0	0	12.3529	1.62386	0.687618	-0.54032	0.344931	0.690493	down	no
7495	MSTRG.4204.1	1	301	MSTRG.4204	.	0	0	0	0	0	0	3.49834	0.522056	0	0	15.4252	2.02773	0.593497	-0.752688	0.25996	0.641407	down	no
7496	MSTRG.4205.1	1	218	MSTRG.4205	.	6.88073	1.38993	0	0	0	0	0	0	0	0	0	0	1.33751	0.419555	0.456053	0.719252	up	no
7502	MSTRG.4216.1	1	389	MSTRG.4216	.	5.78406	1.1684	9.2545	1.14887	0	0	3.88175	0.579272	9.6401	1.07156	14.653	1.9262	0.732994	-0.448127	0.354594	0.698943	down	no
7506	MSTRG.4220.1	1	298	MSTRG.4220	.	0	0	0	0	8.95973	1.47274	0	0	0	0	0	0	1.38526	0.470158	0.414641	0.718646	up	no
7507	MSTRG.4221.1	1	488	MSTRG.4221	.	7.06967	1.42809	16.2131	2.01272	12.377	2.03446	11.25	1.67883	0	0	10.4508	1.37381	1.62071	0.696629	0.211252	0.587361	up	no
7510	MSTRG.4224.1	1	203	MSTRG.4224	.	0	0	0	0	0	0	9.51231	1.41952	0	0	0	0	0.82472	-0.278023	0.122334	0.459939	down	no
7511	MSTRG.4225.1	1	788	MSTRG.4225	.	8.50254	1.71754	16.8173	2.08772	14.7056	2.41721	10.3147	1.53926	0	0	8.73858	1.14873	1.86097	0.896052	0.0999911	0.459939	up	no
7512	MSTRG.4226.1	1	281	MSTRG.4226	.	6.92883	1.39964	0	0	0	0	0	0	0	0	0	0	1.33933	0.421508	0.456053	0.719252	up	no
7513	MSTRG.4227.1	1	311	MSTRG.4227	.	7.23473	1.46144	0	0	0	0	0	0	0	0	0	0	1.35074	0.433751	0.456053	0.719252	up	no
7523	MSTRG.4233.1	1	215	MSTRG.4233	GDI2	0.697674	0.140932	1.39535	0.173221	1.40465	0.230887	2.8093	0.419231	0	0	11.8605	1.55912	0.760732	-0.394539	0.456868	0.719637	down	no
7524	MSTRG.4234.1	1	364	MSTRG.4234	GDI2	0	0	0	0	0	0	10.3709	1.54764	9.89011	1.09935	0	0	0.60902	-0.71544	0.155782	0.520062	down	no
7542	MSTRG.4237.1	1	498	MSTRG.4237	.	7.52209	1.51948	10.8414	1.34586	9.31928	1.53184	9.3996	1.4027	9.01807	1.00242	8.66265	1.13875	1.1552	0.208144	0.0117509	0.25509	up	no
7559	MSTRG.4243.1	3	1465	MSTRG.4243	ENSSSCG00000011147	2.69887	0.54518	17.5532	2.17909	8.38464	1.37821	3.60341	0.537736	3.56246	0.395991	0.391126	0.051415	1.76238	0.817525	0.129691	0.475008	up	no
7575	MSTRG.4247.1	1	304	MSTRG.4247	.	1.48026	0.299018	10.8553	1.34759	1.49013	0.244938	0	0	2.46711	0.274235	0	0	1.39394	0.47917	0.254436	0.634865	up	no
7576	MSTRG.4248.1	3	1755	MSTRG.4248	.	8.01083	1.61821	13.3536	1.65773	10.9487	1.79968	3.19772	0.477195	5.29952	0.589077	2.25966	0.297044	1.86416	0.898528	0.00329984	0.173292	up	no
7578	MSTRG.4250.1	1	636	MSTRG.4250	.	7.03145	1.42037	0	0	4.50629	0.740714	2.61164	0.389733	2.83019	0.314595	1.41509	0.186021	1.28258	0.359051	0.459699	0.719908	up	no
7579	MSTRG.4251.1	1	376	MSTRG.4251	.	4.3883	0.88645	11.5691	1.43621	3.21277	0.528093	2.40957	0.35958	5.58511	0.620822	3.19149	0.419537	1.27643	0.352112	0.197593	0.572995	up	no
7582	MSTRG.4252.1	1	240	MSTRG.4252	.	18.0125	3.63858	13.625	1.69143	16.0667	2.64093	21.175	3.15994	45.7583	5.08635	44.6667	5.87165	0.612852	-0.706389	0.107725	0.459939	down	no
7588	MSTRG.4257.1	1	395	MSTRG.4257	.	2.27848	0.46026	0	0	0	0	10.7038	1.59732	0	0	0	0	0.921454	-0.118016	0.673931	0.840032	down	no
7589	MSTRG.4258.1	1	640	MSTRG.4258	.	0	0	0	0	0	0	11.325	1.69003	0	0	0	0	0.805875	-0.311371	0.122334	0.459939	down	no
7590	MSTRG.4259.1	1	2010	MSTRG.4259	.	0	0	5.8194	0.722429	4.03582	0.663382	0	0	12.3378	1.37143	8.87704	1.16693	0.74792	-0.419044	0.274875	0.656245	down	no
7598	MSTRG.4261.1	1	319	MSTRG.4261	.	8.46395	1.70974	11.7555	1.45934	5.2069	0.855875	7.57367	1.13022	9.85267	1.09519	10.3448	1.35988	1.04234	0.0598212	0.777908	0.898299	up	no
7614	MSTRG.4269.1	1	14807	MSTRG.4269	.	7.00453	1.41494	10.5711	1.31232	10.6616	1.75249	13.7974	2.05898	18.8359	2.09374	12.5528	1.65013	0.859542	-0.21836	0.138212	0.489411	down	no
7616	MSTRG.4271.1	1	2061	MSTRG.4271	.	0	0	0	0	0	0	9.0936	1.35703	0	0	0	0	0.82944	-0.26979	0.122334	0.459939	down	no
7622	MSTRG.4275.1	1	338	MSTRG.4275	.	0	0	0	0	0	0	11.4497	1.70863	0	0	0	0	0.804665	-0.313541	0.122334	0.459939	down	no
7629	MSTRG.4277.1	1	707	MSTRG.4277	.	0	0	1.1669	0.144861	0	0	5.84583	0.872371	0	0	0	0	0.90904	-0.137585	0.455369	0.719252	down	no
7630	MSTRG.4278.1	1	5054	MSTRG.4278	.	4.39345	0.88749	7.17659	0.890913	0	0	9.38831	1.40101	12.9918	1.44413	3.84488	0.505428	0.744887	-0.424907	0.411727	0.718646	down	no
7634	MSTRG.4281.1	1	874	MSTRG.4281	.	0	0	0	0	0	0	10.1716	1.51791	0	0	0	0	0.817582	-0.290565	0.122334	0.459939	down	no
7638	MSTRG.4283.1	1	444	MSTRG.4283	.	0	0	0	0	0.68018	0.111804	9.52252	1.42104	0	0	0	0	0.856674	-0.223181	0.0822189	0.459939	down	no
7648	MSTRG.4290.1	1	359	MSTRG.4290	.	4.17827	0.844024	0	0	0	0	9.25348	1.38089	3.76045	0.417999	0	0	0.884775	-0.176618	0.689664	0.849113	down	no
7649	MSTRG.4291.1	1	906	MSTRG.4291	.	0	0	11.5353	1.43201	17.9757	2.95473	5.16667	0.77102	15.4029	1.71213	0	0	1.28361	0.360211	0.695046	0.852231	up	no
7650	MSTRG.4292.1	1	251	MSTRG.4292	.	8.19124	1.65465	0	0	0	0	0	0	0	0	0	0	1.38525	0.470142	0.456053	0.719252	up	no
7652	MSTRG.4294.1	1	272	MSTRG.4294	.	6.61765	1.33678	0	0	0	0	0	0	0	0	0	0	1.32751	0.408726	0.456053	0.719252	up	no
7653	MSTRG.4295.1	1	203	MSTRG.4295	.	0	0	1.47783	0.18346	0	0	0	0	0	0	0	0	1.05294	0.0744218	0.480118	0.719908	up	no
7678	MSTRG.4303.1	1	2781	MSTRG.4303	IL17D	8.54764	1.72665	0	0	13.1226	2.15701	12.735	1.90044	19.2798	2.14308	11.6383	1.52991	0.744692	-0.425284	0.529505	0.751142	down	no
7687	MSTRG.4306.1	1	1047	MSTRG.4306	.	0	0	0	0	1.29799	0.213356	12.0401	1.79674	12.9007	1.434	0	0	0.60359	-0.728358	0.201641	0.577635	down	no
7692	MSTRG.4312.1	1	2146	MSTRG.4312	.	5.69897	1.15121	9.8369	1.22117	9.95993	1.63715	13.4357	2.005	17.2456	1.91696	13.3625	1.75657	0.813893	-0.297088	0.0628194	0.459939	down	no
7698	MSTRG.4313.1	1	780	MSTRG.4313	.	0	0	0	0	0	0	11.2282	1.67558	0	0	0	0	0.806822	-0.309677	0.122334	0.459939	down	no
7701	MSTRG.4316.1	1	526	MSTRG.4316	.	7.11217	1.43668	0	0	0	0	0	0	0	0	0	0	1.34619	0.428883	0.456053	0.719252	up	no
7702	MSTRG.4317.1	1	475	MSTRG.4317	.	0	0	0	0	0	0	10.8084	1.61294	0	0	0	0	0.811002	-0.302222	0.122334	0.459939	down	no
7709	MSTRG.4318.1	1	335	MSTRG.4318	.	0	0	0	0	0	0	7.66269	1.1435	0	0	0	0	0.846799	-0.239909	0.122334	0.459939	down	no
7710	MSTRG.4319.1	1	1982	MSTRG.4319	.	5.0666	1.02347	10.4985	1.3033	8.5116	1.39908	9.21544	1.37522	14.946	1.66135	11.4839	1.50961	0.882092	-0.180999	0.150603	0.511035	down	no
7712	MSTRG.4320.1	1	237	MSTRG.4320	.	0	0	12.0127	1.49127	5.53587	0.909949	3.18565	0.475394	8.65823	0.96242	10.7595	1.41439	0.835299	-0.259636	0.609837	0.802605	down	no
7724	MSTRG.4330.1	1	342	MSTRG.4330	.	6.84795	1.38331	0	0	0	0	0	0	0	0	0	0	1.33628	0.418219	0.456053	0.719252	up	no
7725	MSTRG.4331.1	1	638	MSTRG.4331	.	0	0	0	0	6.37617	1.04807	0	0	0	0	10.0282	1.31826	0.933902	-0.0986574	0.881805	0.948596	down	no
7741	MSTRG.4340.1	1	292	MSTRG.4340	.	8.21918	1.6603	16.4384	2.04068	10.7774	1.77152	6.20548	0.926041	25.0137	2.78044	0	0	1.44435	0.530423	0.47564	0.719908	up	no
7747	MSTRG.4344.1	1	1111	MSTRG.4344	.	0	0	0	0	0	0	13.0477	1.9471	11.0837	1.23203	4.59046	0.603438	0.479454	-1.06054	0.00975765	0.242118	down	yes
7749	MSTRG.4345.1	1	1232	MSTRG.4345	.	6.93994	1.40189	0	0	8.94237	1.46989	6.00568	0.896226	0	0	0	0	1.61348	0.690177	0.190096	0.565541	up	no
7753	MSTRG.4348.1	1	255	MSTRG.4348	.	9.89804	1.99943	0	0	0	0	5.32941	0.795306	0	0	0	0	1.26999	0.344812	0.61928	0.808536	up	no
7754	MSTRG.4349.1	1	778	MSTRG.4349	.	0	0	6.51928	0.809313	8.92802	1.46753	10.4113	1.55368	0	0	0	0	1.35288	0.436037	0.379836	0.718646	up	no
7757	MSTRG.4351.1	1	217	MSTRG.4351	.	12.4286	2.51061	18.6498	2.31521	0	0	0	0	16.5622	1.841	24.871	3.26941	0.828321	-0.271738	0.670485	0.837831	down	no
7774	MSTRG.4354.1	1	267	MSTRG.4354	.	0	0	1.49753	0.185906	11.2846	1.85489	0	0	14.7266	1.63696	11.7978	1.55087	0.72948	-0.455059	0.535141	0.755057	down	no
7781	MSTRG.4356.1	1	242	MSTRG.4356	.	9.91736	2.00334	16.1157	2.00063	6.23967	1.02564	4.99174	0.744915	8.03306	0.892929	22.9215	3.01314	1.04662	0.0657317	0.882476	0.948788	up	no
7784	MSTRG.4361.1	1	255	MSTRG.4361	.	7.03529	1.42115	0	0	0	0	0	0	0	0	0	0	1.34332	0.425805	0.456053	0.719252	up	no
7786	MSTRG.4365.1	1	301	MSTRG.4365	.	0	0	0	0	8.36877	1.3756	0	0	0	0	1.99336	0.262036	1.24746	0.31899	0.571109	0.777619	up	no
7787	MSTRG.4366.1	1	222	MSTRG.4366	.	0	0	0	0	0	0	14.9505	2.23105	0	0	0	0	0.7743	-0.369035	0.122334	0.459939	down	no
7788	MSTRG.4367.1	1	386	MSTRG.4367	.	0	0	0	0	0	0	10.9534	1.63457	0	0	0	0	0.809545	-0.304816	0.122334	0.459939	down	no
7794	MSTRG.4364.1	1	202	MSTRG.4364	.	10.3168	2.08403	0	0	14.1436	2.32483	17.7624	2.65067	16.5248	1.83684	12.495	1.64254	0.769693	-0.377644	0.575854	0.780894	down	no
7807	MSTRG.4377.1	1	307	MSTRG.4377	ENSSSCG00000009309	1.9544	0.394794	11.0619	1.37324	6.39414	1.05103	28.0358	4.18378	0	0	0	0	1.31709	0.397351	0.400522	0.718646	up	no
7812	MSTRG.4378.1	1	261	MSTRG.4378	.	24.2436	4.89728	33.4912	4.15765	31.206	5.12944	0	0	28.2812	3.14365	22.5313	2.96185	1.92177	0.942434	0.0467452	0.436161	up	no
7814	MSTRG.4380.1	1	232	MSTRG.4380	.	1.2931	0.261211	7.11207	0.882903	7.79741	1.28169	10.4138	1.55405	13.4224	1.49199	0	0	1.00427	0.00614443	0.991541	0.996409	up	no
7818	MSTRG.4381.1	3	613	MSTRG.4381	.	0.112088	0.022642	0	0	0	0	0.123162	0.018379	0.029554	0.003285	17.2915	2.27305	0.632456	-0.660963	0.345513	0.690977	down	no
7819	MSTRG.4381.2	3	3217	MSTRG.4381	.	14.8938	3.00859	24.098	2.99156	22.4396	3.68848	42.2362	6.30288	37.2598	4.14168	39.0062	5.12756	0.71285	-0.48833	0.016242	0.287889	down	no
7820	MSTRG.4381.3	3	2694	MSTRG.4381	.	14.0362	2.83535	25.6443	3.18352	11.6178	1.90965	10.0795	1.50415	27.6589	3.07448	21.192	2.78579	1.0014	0.0020189	0.987827	0.994931	up	no
7827	MSTRG.4383.1	1	214	MSTRG.4383	.	0	0	0	0	0	0	9.87851	1.47416	0	0	0	0	0.820713	-0.285051	0.122334	0.459939	down	no
7833	MSTRG.4386.1	1	2845	MSTRG.4386	.	9.60387	1.94001	15.4583	1.91902	15.6555	2.57335	16.7597	2.50104	11.5596	1.28493	13.477	1.77161	1.16424	0.219393	0.150155	0.510422	up	no
7836	MSTRG.4389.1	1	966	MSTRG.4389	.	0	0	0	0	0	0	10.1837	1.51972	0	0	12.1035	1.59107	0.564847	-0.824068	0.173333	0.544955	down	no
7837	MSTRG.4390.1	1	1546	MSTRG.4390	.	8.53558	1.72421	0	0	8.38034	1.3775	10.9903	1.64008	0	0	8.34088	1.09645	1.1585	0.212256	0.73528	0.874224	up	no
7839	MSTRG.4392.1	1	316	MSTRG.4392	.	0	0	0	0	0	0	0	0	25.943	2.88374	0	0	0.586197	-0.770543	0.327684	0.690493	down	no
7840	MSTRG.4393.1	1	729	MSTRG.4393	.	0	0	6.52812	0.810411	1.57014	0.258089	4.14266	0.618208	0	0	11.6831	1.5358	0.817238	-0.291173	0.62717	0.812677	down	no
7841	MSTRG.4394.1	1	310	MSTRG.4394	.	0	0	0	0	0	0	0	0	0	0	10.6355	1.39809	0.712063	-0.489924	0.344931	0.690493	down	no
7847	MSTRG.4397.1	1	361	MSTRG.4397	.	93.4349	18.8741	194.784	24.1808	68.349	11.2348	45.5706	6.80049	94.8366	10.5417	94.6482	12.442	1.59611	0.67456	0.104957	0.459939	up	no
7855	MSTRG.4402.1	1	806	MSTRG.4402	.	0	0	0	0	0	0	6.72457	1.0035	0	0	0	0	0.859366	-0.218656	0.122334	0.459939	down	no
7856	MSTRG.4403.1	2	3345	MSTRG.4403	.	11.0257	2.22723	0	0	15.0729	2.47758	0	0	0	0	0	0	2.31569	1.21144	0.165644	0.535957	up	no
7857	MSTRG.4403.2	1	1671	MSTRG.4403	.	0	0	32.5955	4.04645	7.30416	1.20061	0	0	0	0	36.5811	4.80876	1.10139	0.139319	0.910196	0.961141	up	no
7858	MSTRG.4405.1	1	1505	MSTRG.4405	.	0	0	0	0	0	0	10.5349	1.57212	5.76346	0.640647	0	0	0.669689	-0.578436	0.123114	0.461445	down	no
7859	MSTRG.4406.1	1	844	MSTRG.4406	.	0	0	0	0	0	0	9.58886	1.43094	0	0	0	0	0.823874	-0.279505	0.122334	0.459939	down	no
7860	MSTRG.4407.1	1	339	MSTRG.4407	.	0	0	0	0	0	0	10.2448	1.52883	0	0	0	0	0.81681	-0.291928	0.122334	0.459939	down	no
7861	MSTRG.4408.1	1	401	MSTRG.4408	.	0	0	0	0	8.02244	1.31868	0	0	0	0	0	0	1.35355	0.43675	0.414641	0.718646	up	no
7866	MSTRG.4404.1	1	213	MSTRG.4404	.	7.00469	1.41497	0	0	0	0	0	0	1.40845	0.156559	0	0	1.26749	0.341972	0.545015	0.761485	up	no
7867	MSTRG.4411.1	1	984	MSTRG.4411	.	0	0	0	0	0	0	9.6748	1.44377	0	0	0	0	0.822929	-0.281161	0.122334	0.459939	down	no
7871	MSTRG.4414.1	1	504	MSTRG.4414	.	0	0	0	0	0	0	17.5456	2.61833	0	0	0	0	0.755417	-0.404656	0.122334	0.459939	down	no
7872	MSTRG.4415.1	1	2396	MSTRG.4415	.	0	0	0	0	0	0	9.1298	1.36244	0	0	0	0	0.829026	-0.270511	0.122334	0.459939	down	no
7874	MSTRG.4417.1	1	771	MSTRG.4417	ENSSSCG00000028065	7.9585	1.60764	0	0	8.02853	1.31968	0	0	12.1816	1.35407	14.3722	1.8893	0.881478	-0.182003	0.79078	0.90531	down	no
7896	MSTRG.4427.1	1	264	MSTRG.4427	.	0.568182	0.114774	6.81818	0.846419	3.43182	0.5641	9.72349	1.45103	5.70833	0.63452	3.40909	0.448142	0.862757	-0.212974	0.512687	0.740673	down	no
7897	MSTRG.4428.1	1	2340	MSTRG.4428	.	3.01075	0.608181	0	0	7.79402	1.28113	8.21154	1.22541	0	0	6.15449	0.809038	1.05213	0.0733094	0.873361	0.944825	up	no
7899	MSTRG.4421.1	1	909	MSTRG.4421	.	0	0	0	0	0	0	12.4455	1.85724	0	0	7.0684	0.929176	0.616255	-0.698401	0.12322	0.461611	down	no
7900	MSTRG.4422.1	1	790	MSTRG.4422	.	2.65823	0.53697	0	0	4.01392	0.659782	9.50633	1.41863	0	0	0	0	1.14251	0.192203	0.2831	0.664982	up	no
7901	MSTRG.4423.1	1	1549	MSTRG.4423	.	6.48806	1.31061	8.77082	1.08882	8.83473	1.45219	8.15365	1.21677	0	0	7.25694	0.95396	1.48338	0.568886	0.173828	0.545614	up	no
7903	MSTRG.4429.1	1	258	MSTRG.4429	.	0	0	0	0	0	0	9.36434	1.39744	0	0	0	0	0.826371	-0.275138	0.122334	0.459939	down	no
7904	MSTRG.4430.1	1	255	MSTRG.4430	.	0	0	0	0	0	0	9.05098	1.35067	0	0	0	0	0.829929	-0.26894	0.122334	0.459939	down	no
7905	MSTRG.4431.1	1	364	MSTRG.4431	.	0	0	3.36264	0.417443	11.6154	1.90926	8.2967	1.23811	0	0	0	0	1.37099	0.455218	0.39411	0.718646	up	no
7906	MSTRG.4432.1	1	262	MSTRG.4432	.	0	0	0	0	10.374	1.70522	0	0	0	0	0	0	1.4308	0.516822	0.414641	0.718646	up	no
7908	MSTRG.4434.1	1	341	MSTRG.4434	.	0	0	0	0	0	0	10.8123	1.61352	0	0	0	0	0.810963	-0.302292	0.122334	0.459939	down	no
7909	MSTRG.4435.1	1	953	MSTRG.4435	.	2.04617	0.413333	0	0	0	0	0	0	8.18153	0.909432	0	0	0.870106	-0.200737	0.62589	0.812144	down	no
7910	MSTRG.4436.1	1	218	MSTRG.4436	.	0	0	0	0	6.92661	1.13855	0	0	0	0	0	0	1.31472	0.394753	0.414641	0.718646	up	no
7911	MSTRG.4437.1	1	285	MSTRG.4437	.	10.5263	2.12635	0	0	2.64912	0.435445	0	0	0	0	0	0	1.66627	0.736622	0.284816	0.666924	up	no
7912	MSTRG.4439.1	1	384	MSTRG.4439	.	0	0	0	0	9.4375	1.55127	0	0	0	0	4.67708	0.614825	1.1631	0.217969	0.737789	0.875837	up	no
7913	MSTRG.4440.1	1	1181	MSTRG.4440	.	0	0	3.4293	0.425718	5.35817	0.880741	11.0237	1.64506	7.86367	0.8741	6.32515	0.831472	0.698829	-0.516988	0.173074	0.544698	down	no
7914	MSTRG.4441.1	1	559	MSTRG.4441	.	0	0	0.536673	0.066623	0	0	11.5796	1.72802	0	0	0	0	0.819441	-0.287288	0.207367	0.583905	down	no
7915	MSTRG.4442.1	1	1518	MSTRG.4442	.	0	0	4.37945	0.543671	0	0	3.70092	0.552287	0	0	0	0	1.03775	0.0534587	0.868259	0.942556	up	no
7916	MSTRG.4443.1	1	2753	MSTRG.4443	.	3.9535	0.79862	5.45478	0.677164	0	0	11.2757	1.68267	14.0476	1.56148	6.34072	0.833519	0.627157	-0.673101	0.166699	0.536776	down	no
7917	MSTRG.4438.1	1	1538	MSTRG.4438	.	0	0	0	0	0	0	11.3264	1.69023	0	0	0	0	0.805862	-0.311396	0.122334	0.459939	down	no
7918	MSTRG.4444.1	1	693	MSTRG.4444	.	2.70418	0.546254	0	0	0	0	9.74747	1.45461	0	0	0	0	0.950871	-0.072679	0.810392	0.914621	down	no
7925	MSTRG.4449.1	1	392	MSTRG.4449	.	0	0	0	0	0	0	15.023	2.24187	0	0	0	0	0.773736	-0.370087	0.122334	0.459939	down	no
7926	MSTRG.4450.1	1	694	MSTRG.4450	.	3.7536	0.758239	0	0	3.04611	0.500699	11.1354	1.66174	14.2133	1.5799	0	0	0.777152	-0.363731	0.53923	0.757881	down	no
7927	MSTRG.4451.1	1	376	MSTRG.4451	.	2.79255	0.564104	0	0	11.2367	1.84702	0	0	0	0	0	0	1.69203	0.758756	0.223199	0.600885	up	no
7928	MSTRG.4452.1	1	202	MSTRG.4452	.	0	0	0	0	2.9901	0.491493	15.2574	2.27686	0	0	4.42574	0.581786	0.746028	-0.422698	0.180774	0.555331	down	no
7929	MSTRG.4453.1	1	375	MSTRG.4453	.	0	0	0	0	4.02667	0.661877	10.4693	1.56234	0	0	0	0	0.977874	-0.0322795	0.867727	0.942218	down	no
7935	MSTRG.4456.1	1	712	MSTRG.4456	.	0	0	6.69677	0.831348	6.85674	1.12707	13.9593	2.08314	13.1559	1.46237	5.93258	0.779867	0.692699	-0.529699	0.294842	0.676322	down	no
7936	MSTRG.4454.1	1	967	MSTRG.4454	.	0	0	0	0	7.92377	1.30246	9.05377	1.35109	0	0	0	0	1.12047	0.164108	0.678155	0.842339	up	no
7941	MSTRG.4458.1	1	212	MSTRG.4458	.	6.77358	1.36828	0	0	0	0	0	0	1.41509	0.157297	0	0	1.25894	0.332209	0.547686	0.763017	up	no
7942	MSTRG.4459.1	1	1128	MSTRG.4459	.	0	0	0	0	0	0	10.0186	1.49507	1.40512	0.156188	0	0	0.773719	-0.370119	0.0885066	0.459939	down	no
7943	MSTRG.4461.1	1	297	MSTRG.4461	.	7.0404	1.42218	0	0	0	0	9.65993	1.44155	0	0	0	0	1.10583	0.145135	0.796148	0.90772	up	no
7944	MSTRG.4462.1	1	1015	MSTRG.4462	.	2.21379	0.447193	0	0	0	0	9.35468	1.396	0	0	0	0	0.935003	-0.0969566	0.717164	0.864547	down	no
7945	MSTRG.4463.1	1	240	MSTRG.4463	.	7.5	1.51502	0	0	0	0	0	0	0	0	0	0	1.36049	0.444122	0.456053	0.719252	up	no
7946	MSTRG.4464.1	1	2406	MSTRG.4464	.	5.53533	1.11815	5.14963	0.639282	0	0	9.9788	1.48913	0	0	5.17955	0.680877	1.00137	0.00196819	0.997098	0.998845	up	no
7947	MSTRG.4465.1	1	312	MSTRG.4465	.	0	0	0	0	0	0	9.67949	1.44447	0	0	0	0	0.822877	-0.281251	0.122334	0.459939	down	no
7948	MSTRG.4466.1	1	513	MSTRG.4466	.	0	0	5.5614	0.690401	6.47563	1.06442	8.24171	1.22991	15.8051	1.75684	11.115	1.46112	0.605275	-0.724338	0.149034	0.508856	down	no
7949	MSTRG.4467.1	1	1858	MSTRG.4467	.	0	0	5.00915	0.621843	3.68568	0.605828	12.2885	1.83381	0	0	5.31593	0.698805	0.891955	-0.164957	0.698155	0.853956	down	no
7950	MSTRG.4470.1	1	862	MSTRG.4470	.	4.93736	0.997361	5.39443	0.669673	5.02204	0.82549	12.1787	1.81742	0	0	0	0	1.4603	0.546262	0.0261856	0.345218	up	no
7951	MSTRG.4471.1	1	1036	MSTRG.4471	.	0	0	0	0	8.00579	1.31594	7.57046	1.12974	13.9488	1.55051	0	0	0.793621	-0.333478	0.633407	0.816232	down	no
7953	MSTRG.4473.1	1	396	MSTRG.4473	.	0	0	0	0	0	0	14.8712	2.21922	0	0	0	0	0.77492	-0.367881	0.122334	0.459939	down	no
7955	MSTRG.4475.1	1	4067	MSTRG.4475	.	4.2385	0.856191	0	0	6.35259	1.0442	13.655	2.03774	11.1355	1.23778	10.418	1.3695	0.650173	-0.621104	0.157707	0.522921	down	no
7960	MSTRG.4477.1	2	993	MSTRG.4477	.	4.08994	0.826181	2.45317	0.30454	5.19537	0.85398	4.72674	0.70537	11.3318	1.25961	7.60775	1.00008	0.817261	-0.29113	0.287134	0.669632	down	no
7961	MSTRG.4477.2	2	1250	MSTRG.4477	.	5.6088	1.13299	4.9088	0.609386	5.0032	0.822393	5.99593	0.89477	6.87998	0.764756	10.6068	1.39432	0.916355	-0.126021	0.585311	0.786897	down	no
7986	MSTRG.4482.1	1	502	MSTRG.4482	.	0	0	0	0	1.20319	0.197772	9.31873	1.39063	0	0	2.39044	0.314235	0.793564	-0.333581	0.0901254	0.459939	down	no
7990	MSTRG.4487.1	1	204	MSTRG.4487	.	0	0	0	0	0	0	9.54412	1.42426	0	0	0	0	0.824368	-0.27864	0.122334	0.459939	down	no
7993	MSTRG.4489.1	1	1061	MSTRG.4489	RFXAP	3.54509	0.716119	2.87206	0.356541	0	0	9.51084	1.4193	3.65644	0.406438	3.87826	0.509817	0.807954	-0.307655	0.393562	0.718646	down	no
7995	MSTRG.4491.1	1	290	MSTRG.4491	SMAD9	0	0	0	0	12.6897	2.08584	0	0	0	0	0	0	1.50023	0.585187	0.414641	0.718646	up	no
7997	MSTRG.4493.1	1	421	MSTRG.4493	SMAD9	5.94774	1.20146	7.06888	0.877542	0	0	8.24941	1.23106	24.3278	2.7042	10.3468	1.36014	0.566903	-0.818825	0.151764	0.512767	down	no
8008	MSTRG.4499.1	1	717	MSTRG.4499	.	2.2901	0.462607	0	0	0	0	9.89819	1.4771	0	0	0	0	0.931527	-0.10233	0.71099	0.860965	down	no
8013	MSTRG.4502.1	1	342	MSTRG.4502	.	0	0	0	0	0	0	13.693	2.0434	0	0	0	0	0.784471	-0.350208	0.122334	0.459939	down	no
8014	MSTRG.4503.1	1	266	MSTRG.4503	.	0	0	0	0	0	0	9.08271	1.35541	0	0	1.12782	0.148257	0.786213	-0.347008	0.073741	0.459939	down	no
8018	MSTRG.4504.1	3	2412	MSTRG.4504	.	17.2445	3.48344	30.374	3.77068	26.0438	4.28092	38.8331	5.79505	26.703	2.96821	24.5164	3.2228	1.06032	0.0844932	0.334062	0.690493	up	no
8023	MSTRG.4509.1	1	358	MSTRG.4509	FREM2	0	0	0	0	0	0	0	0	0	0	10.4749	1.37697	0.714512	-0.48497	0.344931	0.690493	down	no
8033	MSTRG.4511.1	1	3942	MSTRG.4511	.	6.24023	1.26055	11.4505	1.42149	0	0	10.5413	1.57308	10.6953	1.18886	3.72527	0.489704	0.881458	-0.182036	0.761664	0.889108	down	no
8034	MSTRG.4512.1	1	1138	MSTRG.4512	.	7.09315	1.43284	0	0	0	0	7.94552	1.18571	0	0	0	0	1.13452	0.182079	0.746142	0.880419	up	no
8035	MSTRG.4513.1	1	269	MSTRG.4513	.	0	0	0	0	0	0	10.8699	1.62211	0	0	0	0	0.810383	-0.303325	0.122334	0.459939	down	no
8036	MSTRG.4518.1	1	341	MSTRG.4518	.	0	0	9.6129	1.19336	10.6276	1.74689	0	0	0	0	0	0	1.82992	0.871784	0.190756	0.566315	up	no
8038	MSTRG.4520.1	1	237	MSTRG.4520	.	0	0	6.32911	0.785706	0	0	0	0	13.73	1.52618	0	0	0.829255	-0.270113	0.636574	0.818015	down	no
8039	MSTRG.4521.1	1	233	MSTRG.4521	.	6.90987	1.39582	0	0	0	0	0	0	0	0	0	0	1.33861	0.420739	0.456053	0.719252	up	no
8040	MSTRG.4522.1	1	619	MSTRG.4522	.	0	0	90.5315	11.2387	121.59	19.9861	378.871	56.5387	394.75	43.8791	356.942	46.9217	0.132535	-2.91556	0.162504	0.531082	down	no
8041	MSTRG.4523.1	1	433	MSTRG.4523	.	0	0	0	0	11.1316	1.82975	0	0	0	0	0	0	1.45417	0.540194	0.414641	0.718646	up	no
8045	MSTRG.4527.1	1	858	MSTRG.4527	.	7.76923	1.56941	0	0	0	0	13.1072	1.95599	0	0	0	0	1.08176	0.113386	0.850836	0.934573	up	no
8049	MSTRG.4529.1	1	1241	MSTRG.4529	.	0	0	0	0	0	0	9.44561	1.40956	0	0	0	0	0.825462	-0.276726	0.122334	0.459939	down	no
8050	MSTRG.4530.1	1	351	MSTRG.4530	.	0.42735	0.086326	0	0	0	0	10.3248	1.54076	0	0	0	0	0.838838	-0.253536	0.177563	0.551054	down	no
8051	MSTRG.4531.1	1	240	MSTRG.4531	.	6.0875	1.22969	17.4375	2.16472	13.1958	2.16904	3.75833	0.560855	0	0	0	0	2.55629	1.35405	0.00748315	0.21976	up	yes
8052	MSTRG.4532.1	1	416	MSTRG.4532	.	1.44231	0.291351	0	0	0	0	10.1635	1.51669	0	0	3.24117	0.426068	0.775884	-0.366086	0.228235	0.607128	down	no
8053	MSTRG.4533.1	1	310	MSTRG.4533	.	0	0	0	0	5.35806	0.880723	9.25484	1.3811	0	0	0	0	1.03889	0.0550481	0.839052	0.929309	up	no
8054	MSTRG.4534.1	1	242	MSTRG.4534	.	0	0	0	0	0	0	0	0	0	0	8.67769	1.14072	0.74415	-0.426335	0.344931	0.690493	down	no
8055	MSTRG.4535.1	2	452	MSTRG.4535	.	7.94469	1.60485	12.2588	1.52183	14.6704	2.41142	18.6803	2.78766	8.4646	0.940898	9.95575	1.30873	1.18318	0.242667	0.129245	0.474188	up	no
8058	MSTRG.4537.1	1	3746	MSTRG.4537	.	0	0	0	0	0	0	9.90897	1.47871	2.82621	0.314153	0	0	0.736737	-0.440778	0.0955833	0.459939	down	no
8059	MSTRG.4538.1	1	323	MSTRG.4538	.	5.10836	1.0319	0	0	0	0	9.34985	1.39527	0	0	0	0	1.04721	0.06655	0.883736	0.949326	up	no
8061	MSTRG.4540.1	2	2418	MSTRG.4540	.	3.34076	0.674843	5.64495	0.700773	7.77213	1.27753	9.42763	1.40688	11.7016	1.30072	11.5029	1.51211	0.781829	-0.355075	0.128393	0.472405	down	no
8062	MSTRG.4541.1	1	257	MSTRG.4541	.	0	0	2.33463	0.289824	0	0	11.751	1.75359	0	0	0	0	0.866773	-0.206274	0.513089	0.740875	down	no
8067	MSTRG.4548.1	2	4035	MSTRG.4548	FOXO1	7.03271	1.42063	6.86476	0.852201	7.708	1.26699	15.0362	2.24384	16.2429	1.8055	9.38302	1.23344	0.821801	-0.283139	0.173701	0.545448	down	no
8068	MSTRG.4543.1	1	233	MSTRG.4543	.	0	0	0	0	0	0	10.3691	1.54738	0	0	0	0	0.815509	-0.294227	0.122334	0.459939	down	no
8073	MSTRG.4549.1	1	5095	MSTRG.4549	ENSSSCG00000009374	0	0	0	0	0	0	10.7933	1.61068	0	0	0	0	0.811155	-0.301951	0.122334	0.459939	down	no
8075	MSTRG.4551.1	1	2756	MSTRG.4551	ENSSSCG00000009374	0.932404	0.188348	0	0	6.68541	1.0989	9.10341	1.3585	0	0	5.60341	0.736596	0.925946	-0.111	0.792907	0.906349	down	no
8076	MSTRG.4552.1	1	902	MSTRG.4552	ENSSSCG00000009374	0	0	0	0	0	0	10.204	1.52274	0	0	0	0	0.81724	-0.291168	0.122334	0.459939	down	no
8088	MSTRG.4558.1	2	470	MSTRG.4558	.	3.49149	0.705291	5.7383	0.712361	7.02236	1.15429	8.03191	1.1986	8.91915	0.991424	12.5074	1.64417	0.81761	-0.290515	0.226975	0.605868	down	no
8089	MSTRG.4559.1	1	463	MSTRG.4559	.	0	0	0	0	9.13175	1.50102	0	0	0	0	0	0	1.39094	0.476063	0.414641	0.718646	up	no
8090	MSTRG.4560.1	1	296	MSTRG.4560	.	0	0	0	0	0	0	17.277	2.57824	0	0	0	0	0.757254	-0.40115	0.122334	0.459939	down	no
8094	MSTRG.4564.1	1	321	MSTRG.4564	.	0	0	0	0	0	0	10.8193	1.61456	0	0	0	0	0.810892	-0.302418	0.122334	0.459939	down	no
8103	MSTRG.4566.1	1	283	MSTRG.4566	.	22.2438	4.49332	29.1413	3.61765	26.9859	4.43576	20.4876	3.05736	0	0	14.841	1.95092	2.51172	1.32868	0.0837314	0.459939	up	no
8107	MSTRG.4572.1	1	613	MSTRG.4572	.	7.58564	1.53232	0	0	5.41925	0.890781	13.0555	1.94826	0	0	0	0	1.35474	0.438013	0.322469	0.690493	up	no
8108	MSTRG.4573.1	1	236	MSTRG.4573	.	0	0	0	0	8.3178	1.36722	0	0	0	0	0	0	1.36369	0.447511	0.414641	0.718646	up	no
8109	MSTRG.4575.1	1	237	MSTRG.4575	.	0	0	0	0	0	0	9.55696	1.42618	0	0	0	0	0.824226	-0.278889	0.122334	0.459939	down	no
8116	MSTRG.4579.1	1	582	MSTRG.4579	.	4.38144	0.885065	0	0	6.2268	1.02352	12.7131	1.89716	14.4296	1.60394	0	0	0.866398	-0.206898	0.736542	0.875049	down	no
8117	MSTRG.4580.1	1	386	MSTRG.4580	.	0	0	0	0	0	0	11.3368	1.69178	0	0	0	0	0.805761	-0.311577	0.122334	0.459939	down	no
8133	MSTRG.4582.1	1	331	MSTRG.4582	.	0	0	0	0	0	0	11.4048	1.70194	0	0	0	0	0.805099	-0.312762	0.122334	0.459939	down	no
8137	MSTRG.4588.1	5	2275	MSTRG.4588	MLNR	6.33942	1.28058	13.3108	1.65242	10.1701	1.67169	6.87004	1.02521	8.20256	0.911769	5.77958	0.759755	1.34882	0.431696	0.0214619	0.319297	up	no
8146	MSTRG.4605.1	1	309	MSTRG.4605	ENSSSCG00000029933	0	0	0	0	9.77346	1.6065	11.7282	1.75019	0	0	0	0	1.13224	0.179185	0.690598	0.84975	up	no
8148	MSTRG.4607.1	1	549	MSTRG.4607	ENSSSCG00000029933	8.46994	1.71096	17.1985	2.13505	17.1985	2.82698	13.6612	2.03866	15.2495	1.69509	11.9308	1.56836	1.18178	0.240959	0.226545	0.605143	up	no
8149	MSTRG.4608.1	1	5170	MSTRG.4608	ENSSSCG00000029933	7.37988	1.49076	0	0	11.4874	1.88823	11.5544	1.72425	0	0	8.42205	1.10712	1.19536	0.25745	0.686938	0.847826	up	no
8150	MSTRG.4609.1	1	5176	MSTRG.4609	ENSSSCG00000029933	0	0	0	0	4.57507	0.75202	9.27396	1.38395	0	0	5.28518	0.694763	0.824945	-0.277631	0.4773	0.719908	down	no
8151	MSTRG.4610.1	1	1130	MSTRG.4610	ENSSSCG00000029933	0	0	11.6566	1.44707	7.48053	1.2296	4.13717	0.617388	0	0	5.70531	0.749991	1.27195	0.347047	0.57615	0.781098	up	no
8152	MSTRG.4611.1	1	295	MSTRG.4611	ENSSSCG00000029933	0	0	4.51186	0.56011	0	0	8.70169	1.29855	15.7627	1.75213	6.61017	0.868939	0.503266	-0.990606	0.0492985	0.445762	down	no
8153	MSTRG.4612.1	1	475	MSTRG.4612	ENSSSCG00000029933	0.947368	0.191371	0	0	0	0	9.44632	1.40967	0	0	0	0	0.875137	-0.192418	0.319974	0.690493	down	no
8154	MSTRG.4613.1	1	269	MSTRG.4613	ENSSSCG00000029933	3.90335	0.788488	0	0	10.1041	1.66084	5.05204	0.753915	0	0	0	0	1.52774	0.611399	0.2085	0.584794	up	no
8155	MSTRG.4614.1	1	360	MSTRG.4614	ENSSSCG00000029933	0.416667	0.084168	4.72222	0.586224	0	0	10.0667	1.50225	0	0	0	0	0.96872	-0.0458485	0.907407	0.960134	down	no
8156	MSTRG.4615.1	1	1250	MSTRG.4615	ENSSSCG00000029933	3.65517	0.738354	0	0	0	0	10.3864	1.54996	0	0	0	0	0.980589	-0.0282793	0.938824	0.973253	down	no
8157	MSTRG.4616.1	1	1181	MSTRG.4616	ENSSSCG00000029933	4.82642	0.974951	0	0	10.1914	1.67519	0	0	0	0	0	0	1.78849	0.838739	0.17637	0.549304	up	no
8158	MSTRG.4617.1	1	506	MSTRG.4617	ENSSSCG00000029933	0	0	0	0	3.8941	0.640086	11.3399	1.69225	0	0	8.57115	1.12672	0.718293	-0.477355	0.3293	0.690493	down	no
8160	MSTRG.4619.1	1	5735	MSTRG.4619	ENSSSCG00000029933	6.17629	1.24763	12.9686	1.60994	3.47411	0.571051	11.0214	1.64473	0	0	6.98326	0.917984	1.2992	0.377628	0.471786	0.719908	up	no
8162	MSTRG.4592.1	1	1868	MSTRG.4592	.	17.5862	3.55246	29.72	3.68949	17.6167	2.89572	3.03908	0.453521	8.46788	0.941262	3.65525	0.4805	2.64756	1.40467	0.00254376	0.161118	up	yes
8167	MSTRG.4600.1	1	1350	MSTRG.4600	.	0	0	0	0	8.27259	1.35979	2.73111	0.407563	3.97778	0.442157	1.44148	0.18949	1.02326	0.0331783	0.948537	0.977455	up	no
8168	MSTRG.4597.1	1	1164	MSTRG.4597	.	7.85567	1.58687	0	0	0	0	1.42182	0.212178	3.7878	0.42104	2.57732	0.338801	1.02395	0.0341516	0.953332	0.979552	up	no
8169	MSTRG.4598.1	1	1385	MSTRG.4598	.	0	0	0	0	0	0	3.62094	0.540351	0	0	2.49098	0.327451	0.8153	-0.294597	0.127498	0.470331	down	no
8171	MSTRG.4602.2	2	1470	MSTRG.4602	.	19.1372	3.86578	35.7431	4.43721	2.91855	0.479732	0	0	0	0	0	0	3.27966	1.71354	0.0877501	0.459939	up	no
8174	MSTRG.4624.1	1	242	MSTRG.4624	.	8.71901	1.76127	0	0	4.99174	0.820508	0.623967	0.093114	1.23967	0.137798	0	0	1.62328	0.698909	0.25286	0.633508	up	no
8175	MSTRG.4625.1	4	1726	MSTRG.4625	CYSLTR2	18.3047	3.69761	15.2852	1.89752	3.52446	0.579327	0.122693	0.018309	2.19674	0.244182	0.4096	0.053844	2.45069	1.29319	0.0906698	0.459939	up	no
8179	MSTRG.4625.4	3	6470	MSTRG.4625	.	0	0	0	0	13.3805	2.1994	0	0	0	0	0	0	1.51988	0.603954	0.414641	0.718646	up	no
8180	MSTRG.4625.3	3	11396	MSTRG.4625	.	23.8423	4.81622	44.0471	5.46808	26.2022	4.30695	5.61477	0.837891	7.37613	0.819907	6.34949	0.834672	3.17761	1.66794	0.000395073	0.0916816	up	yes
8182	MSTRG.4621.1	1	684	MSTRG.4621	.	6.79824	1.37327	2.63158	0.326688	0	0	0	0	0	0	0.657895	0.086484	1.40895	0.494622	0.332914	0.690493	up	no
8183	MSTRG.4622.1	2	339	MSTRG.4622	.	12.0885	2.44191	0.300885	0.037352	0.312684	0.051397	0	0	2.20059	0.24461	0.884956	0.116332	1.36748	0.451524	0.551818	0.76549	up	no
8184	MSTRG.4623.1	1	277	MSTRG.4623	.	0	0	11.3718	1.41172	5.37906	0.884175	0	0	1.0722	0.119182	0	0	1.57352	0.653996	0.236746	0.615308	up	no
8194	MSTRG.4630.1	1	702	MSTRG.4630	.	3.4188	0.690609	0	0	0	0	0	0	0	0	0	0	1.19156	0.252855	0.456053	0.719252	up	no
8195	MSTRG.4631.1	1	612	MSTRG.4631	.	1.22549	0.247553	2.69118	0.334087	3.20752	0.52723	10.6422	1.58813	3.67157	0.40812	0	0	0.972779	-0.0398156	0.855832	0.936547	down	no
8196	MSTRG.4632.1	1	1762	MSTRG.4632	.	0	0	0	0	0	0	10.8201	1.61468	4.59535	0.510804	0	0	0.689309	-0.536776	0.110726	0.459939	down	no
8197	MSTRG.4633.1	1	1002	MSTRG.4633	.	0	0	0	0	0	0	11.2146	1.67355	13.7295	1.52613	5.04391	0.663047	0.459895	-1.12062	0.0131311	0.265629	down	yes
8201	MSTRG.4636.1	1	526	MSTRG.4636	.	2.85171	0.576054	11.6255	1.4432	9.47338	1.55717	0	0	7.68821	0.854597	0	0	1.68245	0.750567	0.157495	0.522473	up	no
8202	MSTRG.4639.1	1	416	MSTRG.4639	.	0	0	12.2524	1.52103	0	0	4.9375	0.736821	0	0	0	0	1.17677	0.234831	0.712492	0.861837	up	no
8204	MSTRG.4641.1	1	1340	MSTRG.4641	.	4.36567	0.881879	9.71493	1.20602	0	0	10.8388	1.61747	0	0	8.9306	1.17397	0.943635	-0.083699	0.898794	0.956076	down	no
8205	MSTRG.4642.1	1	660	MSTRG.4642	.	0	0	0	0	0	0	0	0	0	0	10.2152	1.34283	0.718536	-0.476867	0.344931	0.690493	down	no
8219	MSTRG.4653.1	1	221	MSTRG.4653	LRCH1	8.1448	1.64527	0	0	5.46606	0.898475	0	0	1.35747	0.150891	0	0	1.64894	0.721538	0.235632	0.614312	up	no
8220	MSTRG.4654.1	1	223	MSTRG.4654	LRCH1	0.672646	0.135877	5.38117	0.668026	0	0	2.03139	0.303144	14.1121	1.56866	4.03587	0.530535	0.673586	-0.570066	0.165454	0.535957	down	no
8221	MSTRG.4655.1	1	258	MSTRG.4655	LRCH1	0	0	0	0	0	0	12.2907	1.83414	0	0	0	0	0.796755	-0.327792	0.122334	0.459939	down	no
8222	MSTRG.4656.1	1	233	MSTRG.4656	LRCH1	1.28755	0.26009	0	0	0	0	9.72103	1.45067	3.86266	0.429361	2.57511	0.33851	0.689248	-0.536904	0.0433499	0.422298	down	no
8223	MSTRG.4657.1	1	474	MSTRG.4657	LRCH1	0	0	0	0	0	0	10.192	1.52095	0	0	0	0	0.817367	-0.290945	0.122334	0.459939	down	no
8224	MSTRG.4658.1	1	257	MSTRG.4658	LRCH1	4.0856	0.825304	7.58755	0.94193	6.46303	1.06235	0	0	15.5642	1.73007	6.78599	0.892052	1.02198	0.0313726	0.899992	0.956485	up	no
8225	MSTRG.4659.1	1	3034	MSTRG.4659	LRCH1	5.01582	1.01321	11.1582	1.3852	9.69743	1.594	11.8181	1.76361	12.2073	1.35692	6.75412	0.887862	1.03767	0.0533487	0.766886	0.892124	up	no
8226	MSTRG.4660.1	1	277	MSTRG.4660	LRCH1	0	0	0	0	0	0	10.8736	1.62267	0	0	0	0	0.810345	-0.303392	0.122334	0.459939	down	no
8228	MSTRG.4662.1	1	680	MSTRG.4662	LRCH1	6.61765	1.33678	0	0	9.43382	1.55067	0	0	0	0	9.92647	1.30488	1.34469	0.427278	0.576464	0.78134	up	no
8229	MSTRG.4663.1	1	217	MSTRG.4663	LRCH1	4.14747	0.837801	6.89862	0.856405	0	0	4.17511	0.623051	17.6498	1.96189	5.48848	0.721487	0.703726	-0.506914	0.287978	0.670366	down	no
8232	MSTRG.4666.1	1	492	MSTRG.4666	LRCH1	0	0	0	0	9.52236	1.56522	0	0	0	0	0	0	1.40369	0.489227	0.414641	0.718646	up	no
8233	MSTRG.4667.1	1	1340	MSTRG.4667	LRCH1	5.4806	1.1071	9.13433	1.13395	6.14925	1.01077	8.95895	1.33694	11.0157	1.22447	7.90746	1.03947	0.956744	-0.0637958	0.37234	0.713678	down	no
8234	MSTRG.4668.1	1	1551	MSTRG.4668	LRCH1	7.96067	1.60808	0	0	8.37718	1.37698	9.11541	1.36029	0	0	0	0	1.55945	0.641042	0.214443	0.590788	up	no
8249	MSTRG.4649.1	1	252	MSTRG.4649	.	0	0	0	0	0	0	13.1825	1.96723	0	0	0	0	0.78882	-0.342232	0.122334	0.459939	down	no
8250	MSTRG.4650.1	1	834	MSTRG.4650	.	11.8489	2.39352	6.6259	0.822549	15.1763	2.49457	18.9029	2.82087	12.0504	1.33948	19.2338	2.52838	0.928302	-0.107334	0.78983	0.904864	down	no
8255	MSTRG.4671.1	1	2677	MSTRG.4671	.	22.2615	4.49689	33.1397	4.11401	29.7337	4.88742	27.7236	4.13718	0	0	31.8024	4.18058	2.03646	1.02606	0.286341	0.668828	up	no
8258	MSTRG.4676.1	2	771	MSTRG.4676	.	8.32435	1.68155	14.9255	1.85288	9.38781	1.54311	9.58885	1.43094	13.8271	1.53698	15.5819	2.04832	0.993351	-0.00962447	0.928145	0.9689	down	no
8259	MSTRG.4677.1	1	202	MSTRG.4677	.	6.68317	1.35002	0	0	3.73762	0.614366	0	0	0	0	0	0	1.58027	0.660172	0.208903	0.585271	up	no
8261	MSTRG.4679.1	1	278	MSTRG.4679	.	1.07914	0.217989	3.23741	0.401897	0	0	3.78777	0.565247	0	0	11.3309	1.48951	0.753856	-0.40764	0.453146	0.719252	down	no
8262	MSTRG.4680.1	1	849	MSTRG.4680	.	4.77032	0.963619	5.80212	0.720284	3.20141	0.526227	9.04947	1.35045	11.0836	1.23202	0	0	1.04196	0.0593064	0.899125	0.956153	up	no
8263	MSTRG.4681.1	1	218	MSTRG.4681	.	0	0	0	0	0	0	9.69725	1.44712	0	0	0	0	0.822683	-0.281592	0.122334	0.459939	down	no
8265	MSTRG.4683.1	1	214	MSTRG.4683	.	0.700935	0.141591	8.28037	1.02794	2.11682	0.347949	9.1729	1.36887	0	0	1.40187	0.184283	1.12125	0.165104	0.692548	0.850789	up	no
8266	MSTRG.4684.1	1	346	MSTRG.4684	.	0	0	0	0	0	0	9.93931	1.48324	0	0	0	0	0.820058	-0.286203	0.122334	0.459939	down	no
8267	MSTRG.4685.1	1	234	MSTRG.4685	.	1.28205	0.258978	0	0	2.49573	0.410231	17.4231	2.60004	0	0	0	0	0.924252	-0.113641	0.0818905	0.459939	down	no
8268	MSTRG.4686.1	1	2297	MSTRG.4686	.	5.05529	1.02118	9.39007	1.1657	7.41489	1.21881	0	0	14.2116	1.57971	0	0	1.47015	0.555961	0.318123	0.690493	up	no
8269	MSTRG.4687.1	1	323	MSTRG.4687	.	0	0	0	0	0	0	0	0	0	0	14.0372	1.84525	0.666329	-0.585694	0.344931	0.690493	down	no
8275	MSTRG.4693.1	1	403	MSTRG.4693	.	5.20347	1.05112	0	0	0	0	14.6129	2.18068	10.397	1.1557	8.08933	1.06338	0.550915	-0.8601	0.126696	0.468689	down	no
8276	MSTRG.4688.1	1	854	MSTRG.4688	.	0	0	0	0	0	0	9.19438	1.37207	0	0	0	0	0.82829	-0.271792	0.122334	0.459939	down	no
8277	MSTRG.4694.1	1	392	MSTRG.4694	.	0	0	3.6352	0.45128	0	0	0	0	10.8418	1.20514	0	0	0.821	-0.284545	0.538134	0.757027	down	no
8281	MSTRG.4695.1	1	726	MSTRG.4695	.	0	0	0	0	0	0	12.8003	1.91018	0	0	0	0	0.792167	-0.336124	0.122334	0.459939	down	no
8282	MSTRG.4698.1	1	229	MSTRG.4698	.	0	0	0	0	9.60262	1.57842	0.659389	0.0984	0	0	0	0	1.37779	0.462359	0.430822	0.719252	up	no
8283	MSTRG.4699.1	1	288	MSTRG.4699	.	0	0	0	0	7.17361	1.17915	0	0	0.520833	0.057894	0	0	1.29465	0.372558	0.452705	0.719252	up	no
8291	MSTRG.4700.1	1	271	MSTRG.4700	.	8.30258	1.67715	0	0	0.557196	0.091588	0	0	0	0	1.10701	0.145522	1.36001	0.443616	0.469736	0.719908	up	no
8296	MSTRG.4701.1	1	232	MSTRG.4701	.	15.0991	3.05007	20.4267	2.5358	4.53879	0.746057	5.1681	0.771234	21.3147	2.36927	17.9784	2.36335	0.980701	-0.0281147	0.943611	0.975635	down	no
8302	MSTRG.4706.1	2	379	MSTRG.4706	.	3.95778	0.799484	1.83905	0.228302	1.19525	0.196467	9.562	1.42693	3.16623	0.351947	3.16623	0.416216	0.883781	-0.178239	0.514045	0.741572	down	no
8315	MSTRG.4708.1	1	304	MSTRG.4708	.	4.93421	0.996725	0	0	0	0	10.898	1.62631	0	0	0	0	1.02042	0.0291655	0.94819	0.977281	up	no
8316	MSTRG.4710.1	1	830	MSTRG.4710	.	0	0	0	0	0	0	14.3313	2.13866	0	0	0	0	0.779215	-0.359906	0.122334	0.459939	down	no
8317	MSTRG.4711.1	1	2854	MSTRG.4711	.	3.67765	0.742895	3.46636	0.430319	0	0	9.57358	1.42866	0	0	0	0	1.10683	0.14644	0.715841	0.863759	up	no
8318	MSTRG.4712.1	1	458	MSTRG.4712	.	0.982533	0.198475	7.51092	0.932417	8.69214	1.42876	0	0	0	0	0	0	1.78891	0.839083	0.0967294	0.459939	up	no
8319	MSTRG.4713.1	1	1280	MSTRG.4713	.	0	0	0	0	0	0	10.3258	1.54091	10.0007	1.11165	4.68516	0.615887	0.504625	-0.986718	0.00624647	0.210126	down	no
[truncated: 11,521 more rows]
