# Supplementary material for: Genome-wide analysis of long non-coding RNA expression profile in porcine circovirus 2-infected intestinal porcine epithelial cell line by RNA sequencing
Source: PeerJ. 2019 Mar 6;7:e6577. doi: 10.7717/peerj.6577 (PMC6408913; doi:10.7717/peerj.6577)
Supplement: Supplemental Information 11 [file peerj-07-6577-s011.xlsx]

## Sheet: Sheet1
GO_ID	GO_Term	GO_function	GO_class	S gene number	TS gene number	B gene number	TB gene number	pvalue
GO:0005615	extracellular space	cellular_component	5	87	529	381	5749	2.22045e-16
GO:0006955	immune response	biological_process	4	37	529	113	5749	1.533e-12
GO:0005576	extracellular region	cellular_component	3	61	529	266	5749	5.08682e-12
GO:0005125	cytokine activity	molecular_function	6	24	529	74	5749	1.76189e-08
GO:0004866	endopeptidase inhibitor activity	molecular_function	6	6	529	7	5749	3.81731e-06
GO:0006260	DNA replication	biological_process	9	14	529	41	5749	8.91682e-06
GO:0030576	Cajal body organization	biological_process	7	6	529	8	5749	1.40793e-05
GO:0008009	chemokine activity	molecular_function	8	10	529	23	5749	1.51657e-05
GO:0030593	neutrophil chemotaxis	biological_process	7	12	529	33	5749	1.89753e-05
GO:0006954	inflammatory response	biological_process	6	20	529	81	5749	2.94687e-05
GO:0002237	response to molecule of bacterial origin	biological_process	6	6	529	9	5749	3.89516e-05
GO:0035690	cellular response to drug	biological_process	6	10	529	26	5749	5.45691e-05
GO:0000811	GINS complex	cellular_component	13	4	529	4	5749	7.09529e-05
GO:1902983	DNA strand elongation involved in mitotic DNA replication	biological_process	14	4	529	4	5749	7.09529e-05
GO:0042517	positive regulation of tyrosine phosphorylation of Stat3 protein	biological_process	12	6	529	10	5749	8.98153e-05
GO:0008080	N-acetyltransferase activity	molecular_function	8	6	529	10	5749	8.98153e-05
GO:0045236	CXCR chemokine receptor binding	molecular_function	8	6	529	10	5749	8.98153e-05
GO:0006935	chemotaxis	biological_process	5	10	529	29	5749	0.000159571
GO:0017075	syntaxin-1 binding	molecular_function	7	6	529	11	5749	0.000182272
GO:2000045	regulation of G1/S transition of mitotic cell cycle	biological_process	9	6	529	11	5749	0.000182272
GO:0090023	positive regulation of neutrophil chemotaxis	biological_process	9	6	529	11	5749	0.000182272
GO:0010951	negative regulation of endopeptidase activity	biological_process	11	12	529	42	5749	0.000273235
GO:1990440	positive regulation of transcription from RNA polymerase II promoter in response to endoplasmic reticulum stress	biological_process	15	4	529	5	5749	0.000328829
GO:0070140	SUMO-specific isopeptidase activity	molecular_function	10	4	529	5	5749	0.000328829
GO:0043312	neutrophil degranulation	biological_process	9	4	529	5	5749	0.000328829
GO:0043138	3'-5' DNA helicase activity	molecular_function	11	4	529	5	5749	0.000328829
GO:1900006	positive regulation of dendrite development	biological_process	9	4	529	5	5749	0.000328829
GO:0050786	RAGE receptor binding	molecular_function	6	6	529	12	5749	0.000336327
GO:0002523	leukocyte migration involved in inflammatory response	biological_process	5	6	529	12	5749	0.000336327
GO:0005540	hyaluronic acid binding	molecular_function	6	6	529	12	5749	0.000336327
GO:0071222	cellular response to lipopolysaccharide	biological_process	8	12	529	44	5749	0.00043922
GO:0008083	growth factor activity	molecular_function	6	13	529	51	5749	0.000525254
GO:1902236	negative regulation of endoplasmic reticulum stress-induced intrinsic apoptotic signaling pathway	biological_process	11	5	529	9	5749	0.000596123
GO:0060170	ciliary membrane	cellular_component	8	3	529	3	5749	0.000775086
GO:0005634	nucleus	cellular_component	9	211	529	1929	5749	0.000804065
GO:0002793	positive regulation of peptide secretion	biological_process	9	4	529	6	5749	0.000914594
GO:0030043	actin filament fragmentation	biological_process	10	4	529	6	5749	0.000914594
GO:0070488	neutrophil aggregation	biological_process	9	4	529	6	5749	0.000914594
GO:0005138	interleukin-6 receptor binding	molecular_function	7	4	529	6	5749	0.000914594
GO:0050544	arachidonic acid binding	molecular_function	8	4	529	6	5749	0.000914594
GO:2000672	negative regulation of motor neuron apoptotic process	biological_process	12	4	529	6	5749	0.000914594
GO:0006749	glutathione metabolic process	biological_process	8	4	529	6	5749	0.000914594
GO:0035662	Toll-like receptor 4 binding	molecular_function	7	4	529	6	5749	0.000914594
GO:0016581	NuRD complex	cellular_component	14	4	529	6	5749	0.000914594
GO:0005130	granulocyte colony-stimulating factor receptor binding	molecular_function	7	4	529	6	5749	0.000914594
GO:0022904	respiratory electron transport chain	biological_process	8	4	529	6	5749	0.000914594
GO:0045732	positive regulation of protein catabolic process	biological_process	9	6	529	14	5749	0.000930812
GO:0030507	spectrin binding	molecular_function	6	5	529	10	5749	0.00110243
GO:0060326	cell chemotaxis	biological_process	8	10	529	36	5749	0.00112158
GO:0005813	centrosome	cellular_component	9	34	529	218	5749	0.00137507
GO:0043066	negative regulation of apoptotic process	biological_process	9	25	529	145	5749	0.00142731
GO:0060828	regulation of canonical Wnt signaling pathway	biological_process	10	6	529	15	5749	0.00143192
GO:0051787	misfolded protein binding	molecular_function	5	6	529	15	5749	0.00143192
GO:0070098	chemokine-mediated signaling pathway	biological_process	9	8	529	26	5749	0.0017069
GO:0008021	synaptic vesicle	cellular_component	11	10	529	38	5749	0.00176312
GO:0030496	midbody	cellular_component	5	13	529	58	5749	0.00191138
GO:0016813	hydrolase activity, acting on carbon-nitrogen (but not peptide) bonds, in linear amidines	molecular_function	6	4	529	7	5749	0.00197903
GO:0061564	axon development	biological_process	7	4	529	7	5749	0.00197903
GO:0010950	positive regulation of endopeptidase activity	biological_process	11	4	529	7	5749	0.00197903
GO:0018119	peptidyl-cysteine S-nitrosylation	biological_process	9	4	529	7	5749	0.00197903
GO:0004300	enoyl-CoA hydratase activity	molecular_function	7	4	529	7	5749	0.00197903
GO:0031434	mitogen-activated protein kinase kinase binding	molecular_function	8	4	529	7	5749	0.00197903
GO:0019731	antibacterial humoral response	biological_process	7	4	529	7	5749	0.00197903
GO:0007017	microtubule-based process	biological_process	5	6	529	16	5749	0.00211503
GO:0035145	exon-exon junction complex	cellular_component	11	6	529	16	5749	0.00211503
GO:0001085	RNA polymerase II transcription factor binding	molecular_function	6	6	529	16	5749	0.00211503
GO:0051603	proteolysis involved in cellular protein catabolic process	biological_process	8	10	529	39	5749	0.0021802
GO:0006952	defense response	biological_process	5	8	529	27	5749	0.00223377
GO:0010628	positive regulation of gene expression	biological_process	8	21	529	118	5749	0.00224915
GO:0031012	extracellular matrix	cellular_component	3	20	529	111	5749	0.00243924
GO:0000165	MAPK cascade	biological_process	9	10	529	40	5749	0.00267312
GO:0004867	serine-type endopeptidase inhibitor activity	molecular_function	7	8	529	28	5749	0.00288028
GO:0035584	calcium-mediated signaling using intracellular calcium source	biological_process	10	3	529	4	5749	0.00288749
GO:0009987	cellular process	biological_process	3	5	529	12	5749	0.00296416
GO:0004714	transmembrane receptor protein tyrosine kinase activity	molecular_function	9	5	529	12	5749	0.00296416
GO:0045931	positive regulation of mitotic cell cycle	biological_process	8	5	529	12	5749	0.00296416
GO:0003678	DNA helicase activity	molecular_function	10	5	529	12	5749	0.00296416
GO:0032467	positive regulation of cytokinesis	biological_process	9	6	529	17	5749	0.00301799
GO:0016020	membrane	cellular_component	3	245	529	2337	5749	0.00322739
GO:0033138	positive regulation of peptidyl-serine phosphorylation	biological_process	10	8	529	29	5749	0.00366379
GO:0001103	RNA polymerase II repressing transcription factor binding	molecular_function	7	4	529	8	5749	0.00367147
GO:0001836	release of cytochrome c from mitochondria	biological_process	7	4	529	8	5749	0.00367147
GO:0002011	morphogenesis of an epithelial sheet	biological_process	7	4	529	8	5749	0.00367147
GO:0060749	mammary gland alveolus development	biological_process	11	4	529	8	5749	0.00367147
GO:0007566	embryo implantation	biological_process	5	4	529	8	5749	0.00367147
GO:0006298	mismatch repair	biological_process	10	4	529	8	5749	0.00367147
GO:0048813	dendrite morphogenesis	biological_process	8	4	529	8	5749	0.00367147
GO:0035518	histone H2A monoubiquitination	biological_process	11	4	529	8	5749	0.00367147
GO:0045580	regulation of T cell differentiation	biological_process	10	4	529	8	5749	0.00367147
GO:0031362	anchored component of external side of plasma membrane	cellular_component	8	4	529	8	5749	0.00367147
GO:0071526	semaphorin-plexin signaling pathway	biological_process	8	4	529	8	5749	0.00367147
GO:0051781	positive regulation of cell division	biological_process	7	4	529	8	5749	0.00367147
GO:0045121	membrane raft	cellular_component	5	11	529	49	5749	0.00413105
GO:0007040	lysosome organization	biological_process	6	6	529	18	5749	0.00418047
GO:0051496	positive regulation of stress fiber assembly	biological_process	10	6	529	18	5749	0.00418047
GO:0050729	positive regulation of inflammatory response	biological_process	8	6	529	18	5749	0.00418047
GO:0031674	I band	cellular_component	12	5	529	13	5749	0.00445654
GO:0006284	base-excision repair	biological_process	10	5	529	13	5749	0.00445654
GO:0008081	phosphoric diester hydrolase activity	molecular_function	7	8	529	30	5749	0.00460253
GO:0005788	endoplasmic reticulum lumen	cellular_component	11	7	529	24	5749	0.00462757
GO:0032869	cellular response to insulin stimulus	biological_process	9	7	529	24	5749	0.00462757
GO:0032496	response to lipopolysaccharide	biological_process	7	10	529	43	5749	0.00470396
GO:0015630	microtubule cytoskeleton	cellular_component	10	12	529	57	5749	0.00487553
GO:0006338	chromatin remodeling	biological_process	8	9	529	37	5749	0.00525886
GO:0009897	external side of plasma membrane	cellular_component	6	13	529	65	5749	0.00547797
GO:0050731	positive regulation of peptidyl-tyrosine phosphorylation	biological_process	10	8	529	31	5749	0.00571543
GO:0000795	synaptonemal complex	cellular_component	13	4	529	9	5749	0.00613175
GO:0048524	positive regulation of viral process	biological_process	6	4	529	9	5749	0.00613175
GO:0071353	cellular response to interleukin-4	biological_process	8	4	529	9	5749	0.00613175
GO:0032183	SUMO binding	molecular_function	6	4	529	9	5749	0.00613175
GO:0030836	positive regulation of actin filament depolymerization	biological_process	11	4	529	9	5749	0.00613175
GO:0006270	DNA replication initiation	biological_process	11	4	529	9	5749	0.00613175
GO:0070063	RNA polymerase binding	molecular_function	6	4	529	9	5749	0.00613175
GO:0030889	negative regulation of B cell proliferation	biological_process	9	4	529	9	5749	0.00613175
GO:0048278	vesicle docking	biological_process	6	4	529	9	5749	0.00613175
GO:0045639	positive regulation of myeloid cell differentiation	biological_process	9	4	529	9	5749	0.00613175
GO:0051219	phosphoprotein binding	molecular_function	5	4	529	9	5749	0.00613175
GO:0007076	mitotic chromosome condensation	biological_process	12	4	529	9	5749	0.00613175
GO:0043410	positive regulation of MAPK cascade	biological_process	11	5	529	14	5749	0.00641528
GO:0042802	identical protein binding	molecular_function	5	39	529	284	5749	0.00654231
GO:0034189	very-low-density lipoprotein particle binding	molecular_function	5	3	529	5	5749	0.00672547
GO:0007041	lysosomal transport	biological_process	7	3	529	5	5749	0.00672547
GO:0005730	nucleolus	cellular_component	11	40	529	295	5749	0.00734833
GO:0032508	DNA duplex unwinding	biological_process	11	6	529	20	5749	0.00744708
GO:1903561	extracellular vesicle	cellular_component	6	6	529	20	5749	0.00744708
GO:0007005	mitochondrion organization	biological_process	5	7	529	26	5749	0.00748328
GO:0090327	negative regulation of locomotion involved in locomotory behavior	biological_process	7	2	529	2	5749	0.00845241
GO:0072679	thymocyte migration	biological_process	7	2	529	2	5749	0.00845241
GO:0006463	steroid hormone receptor complex assembly	biological_process	9	2	529	2	5749	0.00845241
GO:0004316	3-oxoacyl-[acyl-carrier-protein] reductase (NADPH) activity	molecular_function	7	2	529	2	5749	0.00845241
GO:0034447	very-low-density lipoprotein particle clearance	biological_process	6	2	529	2	5749	0.00845241
GO:0003032	detection of oxygen	biological_process	6	2	529	2	5749	0.00845241
GO:1904887	Wnt signalosome assembly	NA	NA	2	529	2	5749	0.00845241
GO:0035947	regulation of gluconeogenesis by regulation of transcription from RNA polymerase II promoter	biological_process	14	2	529	2	5749	0.00845241
GO:0043997	histone acetyltransferase activity (H4-K12 specific	molecular_function	12	2	529	2	5749	0.00845241
GO:0016297	acyl-[acyl-carrier-protein] hydrolase activity	molecular_function	8	2	529	2	5749	0.00845241
GO:0048318	axial mesoderm development	biological_process	7	2	529	2	5749	0.00845241
GO:2000427	positive regulation of apoptotic cell clearance	biological_process	9	2	529	2	5749	0.00845241
GO:0033632	regulation of cell-cell adhesion mediated by integrin	biological_process	7	2	529	2	5749	0.00845241
GO:0045875	negative regulation of sister chromatid cohesion	biological_process	8	2	529	2	5749	0.00845241
GO:0034463	90S preribosome assembly	biological_process	8	2	529	2	5749	0.00845241
GO:1905279	regulation of retrograde transport, endosome to Golgi	NA	NA	2	529	2	5749	0.00845241
GO:0005147	oncostatin-M receptor binding	molecular_function	7	2	529	2	5749	0.00845241
GO:0071071	regulation of phospholipid biosynthetic process	biological_process	7	2	529	2	5749	0.00845241
GO:0034437	glycoprotein transporter activity	molecular_function	6	2	529	2	5749	0.00845241
GO:0031503	protein complex localization	biological_process	6	2	529	2	5749	0.00845241
GO:0018126	protein hydroxylation	biological_process	8	2	529	2	5749	0.00845241
GO:0070997	neuron death	biological_process	6	2	529	2	5749	0.00845241
GO:0004312	fatty acid synthase activity	molecular_function	7	2	529	2	5749	0.00845241
GO:0060161	positive regulation of dopamine receptor signaling pathway	biological_process	11	2	529	2	5749	0.00845241
GO:0036018	cellular response to erythropoietin	biological_process	8	2	529	2	5749	0.00845241
GO:0051900	regulation of mitochondrial depolarization	biological_process	6	2	529	2	5749	0.00845241
GO:0006693	prostaglandin metabolic process	biological_process	10	2	529	2	5749	0.00845241
GO:1900220	semaphorin-plexin signaling pathway involved in bone trabecula morphogenesis	biological_process	9	2	529	2	5749	0.00845241
GO:1902499	positive regulation of protein autoubiquitination	biological_process	13	2	529	2	5749	0.00845241
GO:0051489	regulation of filopodium assembly	biological_process	8	2	529	2	5749	0.00845241
GO:1901297	positive regulation of canonical Wnt signaling pathway involved in cardiac muscle cell fate commitment	biological_process	13	2	529	2	5749	0.00845241
GO:0000799	nuclear condensin complex	cellular_component	13	2	529	2	5749	0.00845241
GO:0032600	chemokine receptor transport out of membrane raft	biological_process	8	2	529	2	5749	0.00845241
GO:0090526	regulation of gluconeogenesis involved in cellular glucose homeostasis	biological_process	8	2	529	2	5749	0.00845241
GO:0097101	blood vessel endothelial cell fate specification	biological_process	8	2	529	2	5749	0.00845241
GO:0048678	response to axon injury	biological_process	6	2	529	2	5749	0.00845241
GO:0071455	cellular response to hyperoxia	biological_process	6	2	529	2	5749	0.00845241
GO:0001909	leukocyte mediated cytotoxicity	biological_process	4	2	529	2	5749	0.00845241
GO:0008215	spermine metabolic process	biological_process	9	2	529	2	5749	0.00845241
GO:0002904	positive regulation of B cell apoptotic process	biological_process	13	2	529	2	5749	0.00845241
GO:1990883	rRNA cytidine N-acetyltransferase activity	NA	NA	2	529	2	5749	0.00845241
GO:1903125	negative regulation of thioredoxin peroxidase activity by peptidyl-threonine phosphorylation	biological_process	10	2	529	2	5749	0.00845241
GO:0032473	cytoplasmic side of mitochondrial outer membrane	cellular_component	14	2	529	2	5749	0.00845241
GO:1990075	periciliary membrane compartment	cellular_component	8	2	529	2	5749	0.00845241
GO:0061511	centriole elongation	biological_process	12	2	529	2	5749	0.00845241
GO:0071287	cellular response to manganese ion	biological_process	8	2	529	2	5749	0.00845241
GO:0006826	iron ion transport	biological_process	9	2	529	2	5749	0.00845241
GO:0002101	tRNA wobble cytosine modification	biological_process	14	2	529	2	5749	0.00845241
GO:0007528	neuromuscular junction development	biological_process	6	2	529	2	5749	0.00845241
GO:0000303	response to superoxide	biological_process	7	2	529	2	5749	0.00845241
GO:0060623	regulation of chromosome condensation	biological_process	12	2	529	2	5749	0.00845241
GO:0036496	regulation of translational initiation by eIF2 alpha dephosphorylation	NA	NA	2	529	2	5749	0.00845241
GO:0031731	CCR6 chemokine receptor binding	molecular_function	9	2	529	2	5749	0.00845241
GO:0002863	positive regulation of inflammatory response to antigenic stimulus	biological_process	7	2	529	2	5749	0.00845241
GO:0009912	auditory receptor cell fate commitment	biological_process	12	2	529	2	5749	0.00845241
GO:0004313	[acyl-carrier-protein] S-acetyltransferase activity	molecular_function	8	2	529	2	5749	0.00845241
GO:0046641	positive regulation of alpha-beta T cell proliferation	biological_process	10	2	529	2	5749	0.00845241
GO:0016768	spermine synthase activity	molecular_function	6	2	529	2	5749	0.00845241
GO:0055106	ubiquitin-protein transferase regulator activity	molecular_function	5	2	529	2	5749	0.00845241
GO:0004465	lipoprotein lipase activity	molecular_function	8	2	529	2	5749	0.00845241
GO:1902711	GABA-A receptor complex	cellular_component	7	2	529	2	5749	0.00845241
GO:0006032	chitin catabolic process	biological_process	8	2	529	2	5749	0.00845241
GO:0022037	metencephalon development	biological_process	11	2	529	2	5749	0.00845241
GO:0097363	protein O-GlcNAc transferase activity	molecular_function	7	2	529	2	5749	0.00845241
GO:0005005	transmembrane-ephrin receptor activity	molecular_function	11	2	529	2	5749	0.00845241
GO:0048266	behavioral response to pain	biological_process	5	2	529	2	5749	0.00845241
GO:0061045	negative regulation of wound healing	biological_process	8	2	529	2	5749	0.00845241
GO:0002329	pre-B cell differentiation	biological_process	11	2	529	2	5749	0.00845241
GO:0042508	tyrosine phosphorylation of Stat1 protein	biological_process	11	2	529	2	5749	0.00845241
GO:0004568	chitinase activity	molecular_function	7	2	529	2	5749	0.00845241
GO:1903573	negative regulation of response to endoplasmic reticulum stress	biological_process	7	2	529	2	5749	0.00845241
GO:0003069	vasodilation by acetylcholine involved in regulation of systemic arterial blood pressure	biological_process	10	2	529	2	5749	0.00845241
GO:0021997	neural plate axis specification	biological_process	9	2	529	2	5749	0.00845241
GO:0009957	epidermal cell fate specification	biological_process	7	2	529	2	5749	0.00845241
GO:0050746	regulation of lipoprotein metabolic process	biological_process	6	2	529	2	5749	0.00845241
GO:0070486	leukocyte aggregation	biological_process	8	2	529	2	5749	0.00845241
GO:0098826	endoplasmic reticulum tubular network membrane	NA	NA	2	529	2	5749	0.00845241
GO:0031344	regulation of cell projection organization	biological_process	6	2	529	2	5749	0.00845241
GO:0016072	rRNA metabolic process	biological_process	10	2	529	2	5749	0.00845241
GO:0060844	arterial endothelial cell fate commitment	biological_process	11	2	529	2	5749	0.00845241
GO:0010983	positive regulation of high-density lipoprotein particle clearance	biological_process	8	2	529	2	5749	0.00845241
GO:0042503	tyrosine phosphorylation of Stat3 protein	biological_process	11	2	529	2	5749	0.00845241
GO:0008330	protein tyrosine/threonine phosphatase activity	molecular_function	9	2	529	2	5749	0.00845241
GO:0042103	positive regulation of T cell homeostatic proliferation	biological_process	8	2	529	2	5749	0.00845241
GO:0044252	negative regulation of multicellular organismal metabolic process	biological_process	7	2	529	2	5749	0.00845241
GO:0033625	positive regulation of integrin activation	biological_process	8	2	529	2	5749	0.00845241
GO:0006531	aspartate metabolic process	biological_process	9	2	529	2	5749	0.00845241
GO:0005314	high-affinity glutamate transmembrane transporter activity	molecular_function	10	2	529	2	5749	0.00845241
GO:0008445	D-aspartate oxidase activity	molecular_function	8	2	529	2	5749	0.00845241
GO:1904713	beta-catenin destruction complex binding	NA	NA	2	529	2	5749	0.00845241
GO:1900170	negative regulation of glucocorticoid mediated signaling pathway	biological_process	11	2	529	2	5749	0.00845241
GO:0043369	CD4-positive or CD8-positive, alpha-beta T cell lineage commitment	biological_process	11	2	529	2	5749	0.00845241
GO:0046014	negative regulation of T cell homeostatic proliferation	biological_process	9	2	529	2	5749	0.00845241
GO:0010484	H3 histone acetyltransferase activity	molecular_function	11	2	529	2	5749	0.00845241
GO:1901529	positive regulation of anion channel activity	biological_process	10	2	529	2	5749	0.00845241
GO:0036479	peroxidase inhibitor activity	molecular_function	5	2	529	2	5749	0.00845241
GO:1903917	positive regulation of endoplasmic reticulum stress-induced eIF2 alpha dephosphorylation	NA	NA	2	529	2	5749	0.00845241
GO:0048773	erythrophore differentiation	biological_process	8	2	529	2	5749	0.00845241
GO:0016296	palmitoyl-[acyl-carrier-protein] hydrolase activity	molecular_function	9	2	529	2	5749	0.00845241
GO:1903461	Okazaki fragment processing involved in mitotic DNA replication	biological_process	14	2	529	2	5749	0.00845241
GO:0002318	myeloid progenitor cell differentiation	biological_process	8	2	529	2	5749	0.00845241
GO:0019478	D-amino acid catabolic process	biological_process	9	2	529	2	5749	0.00845241
GO:1904158	axonemal central apparatus assembly	NA	NA	2	529	2	5749	0.00845241
GO:0051391	tRNA acetylation	biological_process	13	2	529	2	5749	0.00845241
GO:0060159	regulation of dopamine receptor signaling pathway	biological_process	10	2	529	2	5749	0.00845241
GO:0099400	caveola neck	NA	NA	2	529	2	5749	0.00845241
GO:0060696	regulation of phospholipid catabolic process	biological_process	8	2	529	2	5749	0.00845241
GO:0070492	oligosaccharide binding	molecular_function	5	2	529	2	5749	0.00845241
GO:0043368	positive T cell selection	biological_process	11	2	529	2	5749	0.00845241
GO:0001780	neutrophil homeostasis	biological_process	5	2	529	2	5749	0.00845241
GO:1901189	positive regulation of ephrin receptor signaling pathway	biological_process	12	2	529	2	5749	0.00845241
GO:0004890	GABA-A receptor activity	molecular_function	7	2	529	2	5749	0.00845241
GO:0005997	xylulose metabolic process	biological_process	9	2	529	2	5749	0.00845241
GO:0004319	enoyl-[acyl-carrier-protein] reductase (NADPH, B-specific) activity	molecular_function	7	2	529	2	5749	0.00845241
GO:0055093	response to hyperoxia	biological_process	5	2	529	2	5749	0.00845241
GO:0001306	age-dependent response to oxidative stress	biological_process	7	2	529	2	5749	0.00845241
GO:0030229	very-low-density lipoprotein particle receptor activity	molecular_function	6	2	529	2	5749	0.00845241
GO:0060973	cell migration involved in heart development	biological_process	8	2	529	2	5749	0.00845241
GO:1901186	positive regulation of ERBB signaling pathway	biological_process	12	2	529	2	5749	0.00845241
GO:0035750	protein localization to myelin sheath abaxonal region	biological_process	7	2	529	2	5749	0.00845241
GO:0072587	DNA topoisomerase (ATP-hydrolyzing) activator activity	molecular_function	6	2	529	2	5749	0.00845241
GO:0004784	superoxide dismutase activity	molecular_function	6	2	529	2	5749	0.00845241
GO:0030348	syntaxin-3 binding	molecular_function	7	2	529	2	5749	0.00845241
GO:0034436	glycoprotein transport	biological_process	6	2	529	2	5749	0.00845241
GO:0010827	regulation of glucose transport	biological_process	9	2	529	2	5749	0.00845241
GO:0004557	alpha-galactosidase activity	molecular_function	8	2	529	2	5749	0.00845241
GO:0071788	endoplasmic reticulum tubular network maintenance	biological_process	7	2	529	2	5749	0.00845241
GO:1902692	regulation of neuroblast proliferation	biological_process	10	2	529	2	5749	0.00845241
GO:0004315	3-oxoacyl-[acyl-carrier-protein] synthase activity	molecular_function	8	2	529	2	5749	0.00845241
GO:0031699	beta-3 adrenergic receptor binding	molecular_function	8	2	529	2	5749	0.00845241
GO:0006617	SRP-dependent cotranslational protein targeting to membrane, signal sequence recognition	biological_process	10	2	529	2	5749	0.00845241
GO:0097487	multivesicular body, internal vesicle	cellular_component	12	2	529	2	5749	0.00845241
GO:0014823	response to activity	biological_process	4	2	529	2	5749	0.00845241
GO:0003884	D-amino-acid oxidase activity	molecular_function	7	2	529	2	5749	0.00845241
GO:0004314	[acyl-carrier-protein] S-malonyltransferase activity	molecular_function	8	2	529	2	5749	0.00845241
GO:0033291	eukaryotic 80S initiation complex	cellular_component	10	2	529	2	5749	0.00845241
GO:1902803	regulation of synaptic vesicle transport	biological_process	9	2	529	2	5749	0.00845241
GO:1903351	cellular response to dopamine	biological_process	9	2	529	2	5749	0.00845241
GO:0038165	oncostatin-M-mediated signaling pathway	biological_process	9	2	529	2	5749	0.00845241
GO:1902213	positive regulation of prolactin signaling pathway	biological_process	11	2	529	2	5749	0.00845241
GO:0060734	regulation of endoplasmic reticulum stress-induced eIF2 alpha phosphorylation	biological_process	12	2	529	2	5749	0.00845241
GO:0042506	tyrosine phosphorylation of Stat5 protein	biological_process	11	2	529	2	5749	0.00845241
GO:0044154	histone H3-K14 acetylation	biological_process	11	2	529	2	5749	0.00845241
GO:1905289	regulation of CAMKK-AMPK signaling cascade	NA	NA	2	529	2	5749	0.00845241
GO:2000279	negative regulation of DNA biosynthetic process	biological_process	10	2	529	2	5749	0.00845241
GO:0003160	endocardium morphogenesis	biological_process	10	2	529	2	5749	0.00845241
GO:0050850	positive regulation of calcium-mediated signaling	biological_process	11	2	529	2	5749	0.00845241
GO:1903661	positive regulation of complement-dependent cytotoxicity	biological_process	6	2	529	2	5749	0.00845241
GO:0004317	3-hydroxypalmitoyl-[acyl-carrier-protein] dehydratase activity	molecular_function	8	2	529	2	5749	0.00845241
GO:2000138	positive regulation of cell proliferation involved in heart morphogenesis	biological_process	6	2	529	2	5749	0.00845241
GO:0030061	mitochondrial crista	cellular_component	14	2	529	2	5749	0.00845241
GO:0004716	signal transducer, downstream of receptor, with protein tyrosine kinase activity	molecular_function	9	2	529	2	5749	0.00845241
GO:0046683	response to organophosphorus	biological_process	6	2	529	2	5749	0.00845241
GO:0071787	endoplasmic reticulum tubular network assembly	biological_process	7	2	529	2	5749	0.00845241
GO:0033186	CAF-1 complex	cellular_component	5	2	529	2	5749	0.00845241
GO:0035751	regulation of lysosomal lumen pH	biological_process	7	2	529	2	5749	0.00845241
GO:0060486	Clara cell differentiation	biological_process	9	2	529	2	5749	0.00845241
GO:0034119	negative regulation of erythrocyte aggregation	biological_process	8	2	529	2	5749	0.00845241
GO:0046416	D-amino acid metabolic process	biological_process	8	2	529	2	5749	0.00845241
GO:1903828	negative regulation of cellular protein localization	NA	NA	2	529	2	5749	0.00845241
GO:0060598	dichotomous subdivision of terminal units involved in mammary gland duct morphogenesis	biological_process	9	2	529	2	5749	0.00845241
GO:0004910	interleukin-1, Type II, blocking receptor activity	molecular_function	8	2	529	2	5749	0.00845241
GO:2000373	positive regulation of DNA topoisomerase (ATP-hydrolyzing) activity	biological_process	15	2	529	2	5749	0.00845241
GO:0051646	mitochondrion localization	biological_process	6	2	529	2	5749	0.00845241
GO:0048680	positive regulation of axon regeneration	biological_process	10	2	529	2	5749	0.00845241
GO:0016295	myristoyl-[acyl-carrier-protein] hydrolase activity	molecular_function	9	2	529	2	5749	0.00845241
GO:1904812	rRNA acetylation involved in maturation of SSU-rRNA	NA	NA	2	529	2	5749	0.00845241
GO:0016010	dystrophin-associated glycoprotein complex	cellular_component	7	2	529	2	5749	0.00845241
GO:0005153	interleukin-8 receptor binding	molecular_function	9	2	529	2	5749	0.00845241
GO:0034211	GTP-dependent protein kinase activity	molecular_function	9	2	529	2	5749	0.00845241
GO:0016780	phosphotransferase activity, for other substituted phosphate groups	molecular_function	6	2	529	2	5749	0.00845241
GO:0018401	peptidyl-proline hydroxylation to 4-hydroxy-L-proline	biological_process	9	2	529	2	5749	0.00845241
GO:0030850	prostate gland development	biological_process	6	2	529	2	5749	0.00845241
GO:0031177	phosphopantetheine binding	molecular_function	5	2	529	2	5749	0.00845241
GO:0008061	chitin binding	molecular_function	5	2	529	2	5749	0.00845241
GO:0061614	pri-miRNA transcription from RNA polymerase II promoter	biological_process	12	2	529	2	5749	0.00845241
GO:0001659	temperature homeostasis	biological_process	6	2	529	2	5749	0.00845241
GO:0051272	positive regulation of cellular component movement	biological_process	7	2	529	2	5749	0.00845241
GO:0034470	ncRNA processing	biological_process	10	2	529	2	5749	0.00845241
GO:0034107	negative regulation of erythrocyte clearance	biological_process	8	2	529	2	5749	0.00845241
GO:0045569	TRAIL binding	molecular_function	5	2	529	2	5749	0.00845241
GO:0072675	osteoclast fusion	biological_process	11	2	529	2	5749	0.00845241
GO:0038025	reelin receptor activity	molecular_function	6	2	529	2	5749	0.00845241
GO:0007625	grooming behavior	biological_process	5	2	529	2	5749	0.00845241
GO:0004856	xylulokinase activity	molecular_function	8	2	529	2	5749	0.00845241
GO:1990439	MAP kinase threonine phosphatase activity	molecular_function	10	2	529	2	5749	0.00845241
GO:1903215	negative regulation of protein targeting to mitochondrion	biological_process	8	2	529	2	5749	0.00845241
GO:0051392	tRNA N-acetyltransferase activity	molecular_function	9	2	529	2	5749	0.00845241
GO:0009447	putrescine catabolic process	biological_process	10	2	529	2	5749	0.00845241
GO:0007320	insemination	biological_process	7	2	529	2	5749	0.00845241
GO:0061087	positive regulation of histone H3-K27 methylation	biological_process	11	2	529	2	5749	0.00845241
GO:0035564	regulation of kidney size	biological_process	11	2	529	2	5749	0.00845241
GO:0031651	negative regulation of heat generation	biological_process	9	2	529	2	5749	0.00845241
GO:0014041	regulation of neuron maturation	biological_process	11	2	529	2	5749	0.00845241
GO:0004320	oleoyl-[acyl-carrier-protein] hydrolase activity	molecular_function	9	2	529	2	5749	0.00845241
GO:0006919	activation of cysteine-type endopeptidase activity involved in apoptotic process	biological_process	14	8	529	33	5749	0.00854187
GO:0005737	cytoplasm	cellular_component	7	169	529	1575	5749	0.00855503
GO:0007507	heart development	biological_process	8	14	529	76	5749	0.00855813
GO:0006979	response to oxidative stress	biological_process	5	9	529	40	5749	0.0090211
GO:0030042	actin filament depolymerization	biological_process	9	4	529	10	5749	0.00948463
GO:0019722	calcium-mediated signaling	biological_process	9	4	529	10	5749	0.00948463
GO:0048011	neurotrophin TRK receptor signaling pathway	biological_process	10	4	529	10	5749	0.00948463
GO:0007026	negative regulation of microtubule depolymerization	biological_process	9	4	529	10	5749	0.00948463
GO:0007269	neurotransmitter secretion	biological_process	8	4	529	10	5749	0.00948463
GO:0022409	positive regulation of cell-cell adhesion	biological_process	6	4	529	10	5749	0.00948463
GO:0045022	early endosome to late endosome transport	biological_process	7	4	529	10	5749	0.00948463
GO:0035871	protein K11-linked deubiquitination	biological_process	11	4	529	10	5749	0.00948463
GO:1903912	negative regulation of endoplasmic reticulum stress-induced eIF2 alpha phosphorylation	NA	NA	4	529	10	5749	0.00948463
GO:0071108	protein K48-linked deubiquitination	biological_process	11	6	529	21	5749	0.00963272
GO:0045599	negative regulation of fat cell differentiation	biological_process	9	6	529	21	5749	0.00963272
GO:0042127	regulation of cell proliferation	biological_process	5	16	529	93	5749	0.0100017
GO:0009267	cellular response to starvation	biological_process	8	7	529	28	5749	0.0114674
GO:0045087	innate immune response	biological_process	5	14	529	79	5749	0.012004
GO:0030216	keratinocyte differentiation	biological_process	9	6	529	22	5749	0.0122394
GO:0010508	positive regulation of autophagy	biological_process	8	6	529	22	5749	0.0122394
GO:0017017	MAP kinase tyrosine/serine/threonine phosphatase activity	molecular_function	10	3	529	6	5749	0.0125363
GO:0045862	positive regulation of proteolysis	biological_process	9	3	529	6	5749	0.0125363
GO:0034185	apolipoprotein binding	molecular_function	5	3	529	6	5749	0.0125363
GO:0035435	phosphate ion transmembrane transport	biological_process	7	3	529	6	5749	0.0125363
GO:0032355	response to estradiol	biological_process	8	3	529	6	5749	0.0125363
GO:0042987	amyloid precursor protein catabolic process	biological_process	7	3	529	6	5749	0.0125363
GO:0071639	positive regulation of monocyte chemotactic protein-1 production	biological_process	9	3	529	6	5749	0.0125363
GO:0097371	MDM2/MDM4 family protein binding	molecular_function	5	3	529	6	5749	0.0125363
GO:0008542	visual learning	biological_process	8	4	529	11	5749	0.0138363
GO:0014002	astrocyte development	biological_process	9	4	529	11	5749	0.0138363
GO:0046697	decidualization	biological_process	8	4	529	11	5749	0.0138363
GO:1903507	negative regulation of nucleic acid-templated transcription	biological_process	11	4	529	11	5749	0.0138363
GO:0032720	negative regulation of tumor necrosis factor production	biological_process	9	4	529	11	5749	0.0138363
GO:0019897	extrinsic component of plasma membrane	cellular_component	7	4	529	11	5749	0.0138363
GO:0090201	negative regulation of release of cytochrome c from mitochondria	biological_process	9	4	529	11	5749	0.0138363
GO:0043044	ATP-dependent chromatin remodeling	biological_process	9	4	529	11	5749	0.0138363
GO:0005881	cytoplasmic microtubule	cellular_component	9	4	529	11	5749	0.0138363
GO:0034663	endoplasmic reticulum chaperone complex	cellular_component	11	4	529	11	5749	0.0138363
GO:0007169	transmembrane receptor protein tyrosine kinase signaling pathway	biological_process	9	7	529	29	5749	0.0139503
GO:0005764	lysosome	cellular_component	11	14	529	81	5749	0.0148433
GO:0005758	mitochondrial intermembrane space	cellular_component	12	6	529	23	5749	0.0153048
GO:0051059	NF-kappaB binding	molecular_function	6	5	529	17	5749	0.0157343
GO:0031663	lipopolysaccharide-mediated signaling pathway	biological_process	8	5	529	17	5749	0.0157343
GO:0005509	calcium ion binding	molecular_function	7	37	529	282	5749	0.0160529
GO:0007166	cell surface receptor signaling pathway	biological_process	7	9	529	44	5749	0.016831
GO:0090314	positive regulation of protein targeting to membrane	biological_process	9	4	529	12	5749	0.0192724
GO:0071560	cellular response to transforming growth factor beta stimulus	biological_process	8	4	529	12	5749	0.0192724
GO:0050772	positive regulation of axonogenesis	biological_process	10	4	529	12	5749	0.0192724
GO:0043204	perikaryon	cellular_component	7	4	529	12	5749	0.0192724
GO:0048008	platelet-derived growth factor receptor signaling pathway	biological_process	10	4	529	12	5749	0.0192724
GO:0071277	cellular response to calcium ion	biological_process	8	4	529	12	5749	0.0192724
GO:2001244	positive regulation of intrinsic apoptotic signaling pathway	biological_process	10	4	529	12	5749	0.0192724
GO:0000123	histone acetyltransferase complex	cellular_component	8	4	529	12	5749	0.0192724
GO:0031519	PcG protein complex	cellular_component	11	4	529	12	5749	0.0192724
GO:0001525	angiogenesis	biological_process	10	11	529	60	5749	0.0193385
GO:0090090	negative regulation of canonical Wnt signaling pathway	biological_process	11	7	529	31	5749	0.020027
GO:0030175	filopodium	cellular_component	6	5	529	18	5749	0.0201781
GO:0031397	negative regulation of protein ubiquitination	biological_process	12	5	529	18	5749	0.0201781
GO:0042445	hormone metabolic process	biological_process	4	3	529	7	5749	0.0204543
GO:0043931	ossification involved in bone maturation	biological_process	6	3	529	7	5749	0.0204543
GO:0005868	cytoplasmic dynein complex	cellular_component	9	3	529	7	5749	0.0204543
GO:0005640	nuclear outer membrane	cellular_component	8	3	529	7	5749	0.0204543
GO:0000188	inactivation of MAPK activity	biological_process	14	3	529	7	5749	0.0204543
GO:0071397	cellular response to cholesterol	biological_process	9	3	529	7	5749	0.0204543
GO:0010579	positive regulation of adenylate cyclase activity involved in G-protein coupled receptor signaling pathway	biological_process	16	3	529	7	5749	0.0204543
GO:0001706	endoderm formation	biological_process	10	3	529	7	5749	0.0204543
GO:0032729	positive regulation of interferon-gamma production	biological_process	8	6	529	25	5749	0.0229488
GO:0030097	hemopoiesis	biological_process	6	7	529	32	5749	0.0236684
GO:2000349	negative regulation of CD40 signaling pathway	biological_process	10	2	529	3	5749	0.0238071
GO:0072666	establishment of protein localization to vacuole	biological_process	9	2	529	3	5749	0.0238071
GO:0016011	dystroglycan complex	cellular_component	8	2	529	3	5749	0.0238071
GO:0018101	protein citrullination	biological_process	10	2	529	3	5749	0.0238071
GO:0016641	oxidoreductase activity, acting on the CH-NH2 group of donors, oxygen as acceptor	molecular_function	6	2	529	3	5749	0.0238071
GO:0015813	L-glutamate transport	biological_process	10	2	529	3	5749	0.0238071
GO:0043568	positive regulation of insulin-like growth factor receptor signaling pathway	biological_process	12	2	529	3	5749	0.0238071
GO:0070370	cellular heat acclimation	biological_process	7	2	529	3	5749	0.0238071
GO:0031497	chromatin assembly	biological_process	11	2	529	3	5749	0.0238071
GO:0061513	glucose 6-phosphate:inorganic phosphate antiporter activity	molecular_function	11	2	529	3	5749	0.0238071
GO:0021510	spinal cord development	biological_process	9	2	529	3	5749	0.0238071
GO:0002093	auditory receptor cell morphogenesis	biological_process	13	2	529	3	5749	0.0238071
GO:0044194	cytolytic granule	cellular_component	12	2	529	3	5749	0.0238071
GO:0005003	ephrin receptor activity	molecular_function	10	2	529	3	5749	0.0238071
GO:0019343	cysteine biosynthetic process via cystathionine	biological_process	10	2	529	3	5749	0.0238071
GO:0005021	vascular endothelial growth factor-activated receptor activity	molecular_function	10	2	529	3	5749	0.0238071
GO:0006103	2-oxoglutarate metabolic process	biological_process	9	2	529	3	5749	0.0238071
GO:0004450	isocitrate dehydrogenase (NADP+) activity	molecular_function	8	2	529	3	5749	0.0238071
GO:0038162	erythropoietin-mediated signaling pathway	biological_process	9	2	529	3	5749	0.0238071
GO:0035948	positive regulation of gluconeogenesis by positive regulation of transcription from RNA polymerase II promoter	biological_process	15	2	529	3	5749	0.0238071
GO:0061737	leukotriene signaling pathway	NA	NA	2	529	3	5749	0.0238071
GO:0016242	negative regulation of macroautophagy	biological_process	9	2	529	3	5749	0.0238071
GO:1900076	regulation of cellular response to insulin stimulus	biological_process	10	2	529	3	5749	0.0238071
GO:0016139	glycoside catabolic process	biological_process	7	2	529	3	5749	0.0238071
GO:0060463	lung lobe morphogenesis	biological_process	10	2	529	3	5749	0.0238071
GO:0060323	head morphogenesis	biological_process	6	2	529	3	5749	0.0238071
GO:0046632	alpha-beta T cell differentiation	biological_process	10	2	529	3	5749	0.0238071
GO:0038063	collagen-activated tyrosine kinase receptor signaling pathway	biological_process	10	2	529	3	5749	0.0238071
GO:0072334	UDP-galactose transmembrane transport	biological_process	7	2	529	3	5749	0.0238071
GO:0038026	reelin-mediated signaling pathway	biological_process	8	2	529	3	5749	0.0238071
GO:0036414	histone citrullination	biological_process	11	2	529	3	5749	0.0238071
GO:0019346	transsulfuration	biological_process	9	2	529	3	5749	0.0238071
GO:1904247	positive regulation of polynucleotide adenylyltransferase activity	NA	NA	2	529	3	5749	0.0238071
GO:0004900	erythropoietin receptor activity	molecular_function	7	2	529	3	5749	0.0238071
GO:0005664	nuclear origin of replication recognition complex	cellular_component	13	2	529	3	5749	0.0238071
GO:0043983	histone H4-K12 acetylation	biological_process	11	2	529	3	5749	0.0238071
GO:0044547	DNA topoisomerase binding	molecular_function	6	2	529	3	5749	0.0238071
GO:0045721	negative regulation of gluconeogenesis	biological_process	8	2	529	3	5749	0.0238071
GO:0005459	UDP-galactose transmembrane transporter activity	molecular_function	10	2	529	3	5749	0.0238071
GO:0010698	acetyltransferase activator activity	molecular_function	5	2	529	3	5749	0.0238071
GO:0060744	mammary gland branching involved in thelarche	biological_process	8	2	529	3	5749	0.0238071
GO:0004621	glycosylphosphatidylinositol phospholipase D activity	molecular_function	9	2	529	3	5749	0.0238071
GO:0036353	histone H2A-K119 monoubiquitination	biological_process	12	2	529	3	5749	0.0238071
GO:0018272	protein-pyridoxal-5-phosphate linkage via peptidyl-N6-pyridoxal phosphate-L-lysine	biological_process	10	2	529	3	5749	0.0238071
GO:0071223	cellular response to lipoteichoic acid	biological_process	7	2	529	3	5749	0.0238071
GO:0010715	regulation of extracellular matrix disassembly	biological_process	7	2	529	3	5749	0.0238071
GO:1903645	negative regulation of chaperone-mediated protein folding	biological_process	10	2	529	3	5749	0.0238071
GO:0006102	isocitrate metabolic process	biological_process	9	2	529	3	5749	0.0238071
GO:0030957	Tat protein binding	molecular_function	6	2	529	3	5749	0.0238071
GO:0031528	microvillus membrane	cellular_component	8	2	529	3	5749	0.0238071
GO:0045505	dynein intermediate chain binding	molecular_function	6	2	529	3	5749	0.0238071
GO:0004123	cystathionine gamma-lyase activity	molecular_function	6	2	529	3	5749	0.0238071
GO:0030261	chromosome condensation	biological_process	11	2	529	3	5749	0.0238071
GO:0022028	tangential migration from the subventricular zone to the olfactory bulb	biological_process	10	2	529	3	5749	0.0238071
GO:0035606	peptidyl-cysteine S-trans-nitrosylation	biological_process	10	2	529	3	5749	0.0238071
GO:0000302	response to reactive oxygen species	biological_process	6	2	529	3	5749	0.0238071
GO:0045980	negative regulation of nucleotide metabolic process	biological_process	11	2	529	3	5749	0.0238071
GO:0072554	blood vessel lumenization	biological_process	10	2	529	3	5749	0.0238071
GO:0070891	lipoteichoic acid binding	molecular_function	5	2	529	3	5749	0.0238071
GO:0001834	trophectodermal cell proliferation	biological_process	12	2	529	3	5749	0.0238071
GO:0043405	regulation of MAP kinase activity	biological_process	12	2	529	3	5749	0.0238071
GO:0000154	rRNA modification	biological_process	12	2	529	3	5749	0.0238071
GO:0071931	positive regulation of transcription involved in G1/S transition of mitotic cell cycle	biological_process	14	2	529	3	5749	0.0238071
GO:0044540	L-cystine L-cysteine-lyase (deaminating	molecular_function	6	2	529	3	5749	0.0238071
GO:0016012	sarcoglycan complex	cellular_component	9	2	529	3	5749	0.0238071
GO:0060236	regulation of mitotic spindle organization	biological_process	9	2	529	3	5749	0.0238071
GO:0004448	isocitrate dehydrogenase activity	molecular_function	7	2	529	3	5749	0.0238071
GO:0032287	peripheral nervous system myelin maintenance	biological_process	12	2	529	3	5749	0.0238071
GO:1902751	positive regulation of cell cycle G2/M phase transition	biological_process	10	2	529	3	5749	0.0238071
GO:0045927	positive regulation of growth	biological_process	5	2	529	3	5749	0.0238071
GO:0005026	transforming growth factor beta receptor activity, type II	molecular_function	11	2	529	3	5749	0.0238071
GO:0038062	protein tyrosine kinase collagen receptor activity	molecular_function	10	2	529	3	5749	0.0238071
GO:0040012	regulation of locomotion	biological_process	4	2	529	3	5749	0.0238071
GO:0035259	glucocorticoid receptor binding	molecular_function	9	2	529	3	5749	0.0238071
GO:0042555	MCM complex	cellular_component	5	2	529	3	5749	0.0238071
GO:0036494	positive regulation of translation initiation in response to endoplasmic reticulum stress	NA	NA	2	529	3	5749	0.0238071
GO:0004126	cytidine deaminase activity	molecular_function	7	2	529	3	5749	0.0238071
GO:0001631	cysteinyl leukotriene receptor activity	molecular_function	9	2	529	3	5749	0.0238071
GO:0060750	epithelial cell proliferation involved in mammary gland duct elongation	biological_process	10	2	529	3	5749	0.0238071
GO:0070574	cadmium ion transmembrane transport	biological_process	7	2	529	3	5749	0.0238071
GO:0045835	negative regulation of meiotic nuclear division	biological_process	7	2	529	3	5749	0.0238071
GO:0036091	positive regulation of transcription from RNA polymerase II promoter in response to oxidative stress	biological_process	15	2	529	3	5749	0.0238071
GO:0072573	tolerance induction to lipopolysaccharide	biological_process	5	2	529	3	5749	0.0238071
GO:0005031	tumor necrosis factor-activated receptor activity	molecular_function	7	2	529	3	5749	0.0238071
GO:0032873	negative regulation of stress-activated MAPK cascade	biological_process	12	2	529	3	5749	0.0238071
GO:0021747	cochlear nucleus development	biological_process	13	2	529	3	5749	0.0238071
GO:0045722	positive regulation of gluconeogenesis	biological_process	8	2	529	3	5749	0.0238071
GO:0072602	interleukin-4 secretion	biological_process	8	2	529	3	5749	0.0238071
GO:0006597	spermine biosynthetic process	biological_process	10	2	529	3	5749	0.0238071
GO:0090498	extrinsic component of Golgi membrane	cellular_component	12	2	529	3	5749	0.0238071
GO:0070429	negative regulation of nucleotide-binding oligomerization domain containing 1 signaling pathway	biological_process	12	2	529	3	5749	0.0238071
GO:1901301	regulation of cargo loading into COPII-coated vesicle	biological_process	10	2	529	3	5749	0.0238071
GO:0010826	negative regulation of centrosome duplication	biological_process	12	2	529	3	5749	0.0238071
GO:0042023	DNA endoreduplication	biological_process	11	2	529	3	5749	0.0238071
GO:0045919	positive regulation of cytolysis	biological_process	6	2	529	3	5749	0.0238071
GO:1990622	CHOP-ATF3 complex	NA	NA	2	529	3	5749	0.0238071
GO:0071922	regulation of cohesin loading	biological_process	8	2	529	3	5749	0.0238071
GO:1902626	assembly of large subunit precursor of preribosome	biological_process	9	2	529	3	5749	0.0238071
GO:0044342	type B pancreatic cell proliferation	biological_process	5	2	529	3	5749	0.0238071
GO:0004169	dolichyl-phosphate-mannose-protein mannosyltransferase activity	molecular_function	8	2	529	3	5749	0.0238071
GO:0060699	regulation of endoribonuclease activity	biological_process	11	2	529	3	5749	0.0238071
GO:0005313	L-glutamate transmembrane transporter activity	molecular_function	9	2	529	3	5749	0.0238071
GO:0071726	cellular response to diacyl bacterial lipopeptide	biological_process	9	2	529	3	5749	0.0238071
GO:1903638	positive regulation of protein import into mitochondrial outer membrane	biological_process	10	2	529	3	5749	0.0238071
GO:0060735	regulation of eIF2 alpha phosphorylation by dsRNA	biological_process	12	2	529	3	5749	0.0238071
GO:0008537	proteasome activator complex	cellular_component	9	2	529	3	5749	0.0238071
GO:1990261	pre-mRNA catabolic process	biological_process	9	2	529	3	5749	0.0238071
GO:0045131	pre-mRNA branch point binding	molecular_function	8	2	529	3	5749	0.0238071
GO:0098519	nucleotide phosphatase activity, acting on free nucleotides	molecular_function	8	2	529	3	5749	0.0238071
GO:0044524	protein sulfhydration	biological_process	8	2	529	3	5749	0.0238071
GO:0003139	secondary heart field specification	biological_process	10	2	529	3	5749	0.0238071
GO:1902742	apoptotic process involved in development	biological_process	8	2	529	3	5749	0.0238071
GO:0009972	cytidine deamination	biological_process	12	2	529	3	5749	0.0238071
GO:0004974	leukotriene receptor activity	molecular_function	8	2	529	3	5749	0.0238071
GO:0071401	cellular response to triglyceride	biological_process	8	2	529	3	5749	0.0238071
GO:0006266	DNA ligation	biological_process	9	2	529	3	5749	0.0238071
GO:0001833	inner cell mass cell proliferation	biological_process	12	2	529	3	5749	0.0238071
GO:0038202	TORC1 signaling	biological_process	9	2	529	3	5749	0.0238071
GO:0008429	phosphatidylethanolamine binding	molecular_function	6	2	529	3	5749	0.0238071
GO:0003726	double-stranded RNA adenosine deaminase activity	molecular_function	8	2	529	3	5749	0.0238071
GO:0032691	negative regulation of interleukin-1 beta production	biological_process	9	2	529	3	5749	0.0238071
GO:0045113	regulation of integrin biosynthetic process	biological_process	8	2	529	3	5749	0.0238071
GO:0000808	origin recognition complex	cellular_component	11	2	529	3	5749	0.0238071
GO:0032376	positive regulation of cholesterol transport	biological_process	9	2	529	3	5749	0.0238071
GO:0021517	ventral spinal cord development	biological_process	10	2	529	3	5749	0.0238071
GO:0060613	fat pad development	biological_process	9	2	529	3	5749	0.0238071
GO:0071727	cellular response to triacyl bacterial lipopeptide	biological_process	9	2	529	3	5749	0.0238071
GO:0033327	Leydig cell differentiation	biological_process	7	2	529	3	5749	0.0238071
GO:1904831	positive regulation of aortic smooth muscle cell differentiation	NA	NA	2	529	3	5749	0.0238071
GO:0071294	cellular response to zinc ion	biological_process	8	2	529	3	5749	0.0238071
GO:0008967	phosphoglycolate phosphatase activity	molecular_function	8	2	529	3	5749	0.0238071
GO:0034148	negative regulation of toll-like receptor 5 signaling pathway	biological_process	11	2	529	3	5749	0.0238071
GO:0030215	semaphorin receptor binding	molecular_function	6	2	529	3	5749	0.0238071
GO:0006114	glycerol biosynthetic process	biological_process	8	2	529	3	5749	0.0238071
GO:0006507	GPI anchor release	biological_process	11	2	529	3	5749	0.0238071
GO:0016266	O-glycan processing	biological_process	10	2	529	3	5749	0.0238071
GO:0070433	negative regulation of nucleotide-binding oligomerization domain containing 2 signaling pathway	biological_process	12	2	529	3	5749	0.0238071
GO:0038084	vascular endothelial growth factor signaling pathway	biological_process	10	2	529	3	5749	0.0238071
GO:0047291	lactosylceramide alpha-2,3-sialyltransferase activity	molecular_function	7	2	529	3	5749	0.0238071
GO:0043136	glycerol-3-phosphatase activity	molecular_function	8	2	529	3	5749	0.0238071
GO:0033634	positive regulation of cell-cell adhesion mediated by integrin	biological_process	7	2	529	3	5749	0.0238071
GO:0035655	interleukin-18-mediated signaling pathway	biological_process	9	2	529	3	5749	0.0238071
GO:0090178	regulation of establishment of planar polarity involved in neural tube closure	biological_process	14	2	529	3	5749	0.0238071
GO:0035014	phosphatidylinositol 3-kinase regulator activity	molecular_function	5	2	529	3	5749	0.0238071
GO:0004668	protein-arginine deiminase activity	molecular_function	7	2	529	3	5749	0.0238071
GO:0048037	cofactor binding	molecular_function	4	2	529	3	5749	0.0238071
GO:2000300	regulation of synaptic vesicle exocytosis	biological_process	10	2	529	3	5749	0.0238071
GO:0042095	interferon-gamma biosynthetic process	biological_process	8	2	529	3	5749	0.0238071
GO:0061133	endopeptidase activator activity	molecular_function	6	2	529	3	5749	0.0238071
GO:0016262	protein N-acetylglucosaminyltransferase activity	molecular_function	8	2	529	3	5749	0.0238071
GO:0022890	inorganic cation transmembrane transporter activity	molecular_function	8	2	529	3	5749	0.0238071
GO:0061302	smooth muscle cell-matrix adhesion	biological_process	7	2	529	3	5749	0.0238071
GO:0016231	beta-N-acetylglucosaminidase activity	molecular_function	9	2	529	3	5749	0.0238071
GO:0089711	L-glutamate transmembrane transport	biological_process	9	2	529	3	5749	0.0238071
GO:0070062	extracellular exosome	cellular_component	7	105	529	958	5749	0.0243412
GO:0016788	hydrolase activity, acting on ester bonds	molecular_function	5	5	529	19	5749	0.0253691
GO:0000979	RNA polymerase II core promoter sequence-specific DNA binding	molecular_function	11	5	529	19	5749	0.0253691
GO:0098794	postsynapse	NA	NA	5	529	19	5749	0.0253691
GO:0000118	histone deacetylase complex	cellular_component	13	4	529	13	5749	0.0258572
GO:0051443	positive regulation of ubiquitin-protein transferase activity	biological_process	13	4	529	13	5749	0.0258572
GO:0009611	response to wounding	biological_process	5	4	529	13	5749	0.0258572
GO:0008637	apoptotic mitochondrial changes	biological_process	6	4	529	13	5749	0.0258572
GO:0045736	negative regulation of cyclin-dependent protein serine/threonine kinase activity	biological_process	13	4	529	13	5749	0.0258572
GO:2000352	negative regulation of endothelial cell apoptotic process	biological_process	11	4	529	13	5749	0.0258572
GO:0097067	cellular response to thyroid hormone stimulus	biological_process	8	4	529	13	5749	0.0258572
GO:0005902	microvillus	cellular_component	6	4	529	13	5749	0.0258572
GO:0042393	histone binding	molecular_function	5	11	529	63	5749	0.0270778
GO:0005856	cytoskeleton	cellular_component	9	16	529	104	5749	0.0272393
GO:0021762	substantia nigra development	biological_process	11	6	529	26	5749	0.0275885
GO:0008286	insulin receptor signaling pathway	biological_process	10	6	529	26	5749	0.0275885
GO:0003677	DNA binding	molecular_function	6	70	529	612	5749	0.0279916
GO:0016887	ATPase activity	molecular_function	9	15	529	96	5749	0.028155
GO:0006469	negative regulation of protein kinase activity	biological_process	11	9	529	48	5749	0.0287055
GO:0071539	protein localization to centrosome	biological_process	9	3	529	8	5749	0.0305241
GO:0051539	4 iron, 4 sulfur cluster binding	molecular_function	6	3	529	8	5749	0.0305241
GO:0035269	protein O-linked mannosylation	biological_process	10	3	529	8	5749	0.0305241
GO:0015299	solute:proton antiporter activity	molecular_function	9	3	529	8	5749	0.0305241
GO:0015293	symporter activity	molecular_function	7	3	529	8	5749	0.0305241
GO:0051966	regulation of synaptic transmission, glutamatergic	biological_process	10	3	529	8	5749	0.0305241
GO:0035641	locomotory exploration behavior	biological_process	5	3	529	8	5749	0.0305241
GO:0030262	apoptotic nuclear changes	biological_process	10	3	529	8	5749	0.0305241
GO:0051014	actin filament severing	biological_process	6	3	529	8	5749	0.0305241
GO:0001939	female pronucleus	cellular_component	11	3	529	8	5749	0.0305241
GO:0006268	DNA unwinding involved in DNA replication	biological_process	11	3	529	8	5749	0.0305241
GO:0060076	excitatory synapse	cellular_component	4	3	529	8	5749	0.0305241
GO:0001558	regulation of cell growth	biological_process	6	5	529	20	5749	0.0313431
GO:0001933	negative regulation of protein phosphorylation	biological_process	10	5	529	20	5749	0.0313431
GO:0051225	spindle assembly	biological_process	8	5	529	20	5749	0.0313431
GO:0008152	metabolic process	biological_process	3	25	529	185	5749	0.0314724
GO:0004175	endopeptidase activity	molecular_function	7	7	529	34	5749	0.0322639
GO:0006914	autophagy	biological_process	6	7	529	34	5749	0.0322639
GO:0032092	positive regulation of protein binding	biological_process	7	6	529	27	5749	0.0328079
GO:0005518	collagen binding	molecular_function	6	6	529	27	5749	0.0328079
GO:0004407	histone deacetylase activity	molecular_function	7	4	529	14	5749	0.0336339
GO:0051881	regulation of mitochondrial membrane potential	biological_process	6	4	529	14	5749	0.0336339
GO:0000989	transcription factor activity, transcription factor binding	molecular_function	4	4	529	14	5749	0.0336339
GO:1902042	negative regulation of extrinsic apoptotic signaling pathway via death domain receptors	biological_process	11	4	529	14	5749	0.0336339
GO:0035019	somatic stem cell population maintenance	biological_process	10	4	529	14	5749	0.0336339
GO:0042149	cellular response to glucose starvation	biological_process	9	4	529	14	5749	0.0336339
GO:0001578	microtubule bundle formation	biological_process	7	4	529	14	5749	0.0336339
GO:0050790	regulation of catalytic activity	biological_process	5	9	529	50	5749	0.0364375
GO:0008017	microtubule binding	molecular_function	7	16	529	108	5749	0.0371891
GO:0018108	peptidyl-tyrosine phosphorylation	biological_process	9	7	529	35	5749	0.0372544
GO:0007626	locomotory behavior	biological_process	4	5	529	21	5749	0.0381276
GO:0071260	cellular response to mechanical stimulus	biological_process	6	5	529	21	5749	0.0381276
GO:1903506	regulation of nucleic acid-templated transcription	biological_process	10	5	529	21	5749	0.0381276
GO:0003151	outflow tract morphogenesis	biological_process	10	5	529	21	5749	0.0381276
GO:0016485	protein processing	biological_process	7	6	529	28	5749	0.038628
GO:0006898	receptor-mediated endocytosis	biological_process	8	6	529	28	5749	0.038628
GO:0002020	protease binding	molecular_function	6	8	529	43	5749	0.0396938
GO:1900026	positive regulation of substrate adhesion-dependent cell spreading	biological_process	11	4	529	15	5749	0.0426255
GO:0007162	negative regulation of cell adhesion	biological_process	5	4	529	15	5749	0.0426255
GO:0008180	COP9 signalosome	cellular_component	11	4	529	15	5749	0.0426255
GO:0006959	humoral immune response	biological_process	5	4	529	15	5749	0.0426255
GO:0004190	aspartic-type endopeptidase activity	molecular_function	8	4	529	15	5749	0.0426255
GO:0030414	peptidase inhibitor activity	molecular_function	5	4	529	15	5749	0.0426255
GO:0003910	DNA ligase (ATP) activity	molecular_function	7	3	529	9	5749	0.0427202
GO:0060425	lung morphogenesis	biological_process	9	3	529	9	5749	0.0427202
GO:0016805	dipeptidase activity	molecular_function	8	3	529	9	5749	0.0427202
GO:0061136	regulation of proteasomal protein catabolic process	biological_process	10	3	529	9	5749	0.0427202
GO:0006517	protein deglycosylation	biological_process	8	3	529	9	5749	0.0427202
GO:0048488	synaptic vesicle endocytosis	biological_process	10	3	529	9	5749	0.0427202
GO:0032230	positive regulation of synaptic transmission, GABAergic	biological_process	11	3	529	9	5749	0.0427202
GO:0044387	negative regulation of protein kinase activity by regulation of protein phosphorylation	biological_process	12	3	529	9	5749	0.0427202
GO:0007274	neuromuscular synaptic transmission	biological_process	8	3	529	9	5749	0.0427202
GO:0002842	positive regulation of T cell mediated immune response to tumor cell	biological_process	10	2	529	4	5749	0.0447266
GO:0051908	double-stranded DNA 5'-3' exodeoxyribonuclease activity	molecular_function	11	2	529	4	5749	0.0447266
GO:0043292	contractile fiber	cellular_component	9	2	529	4	5749	0.0447266
GO:0030595	leukocyte chemotaxis	biological_process	5	2	529	4	5749	0.0447266
GO:2001135	regulation of endocytic recycling	biological_process	7	2	529	4	5749	0.0447266
GO:0042311	vasodilation	biological_process	9	2	529	4	5749	0.0447266
GO:0007019	microtubule depolymerization	biological_process	8	2	529	4	5749	0.0447266
GO:0046636	negative regulation of alpha-beta T cell activation	biological_process	9	2	529	4	5749	0.0447266
GO:0044839	cell cycle G2/M phase transition	biological_process	8	2	529	4	5749	0.0447266
GO:0032839	dendrite cytoplasm	cellular_component	10	2	529	4	5749	0.0447266
GO:0008597	calcium-dependent protein serine/threonine phosphatase regulator activity	molecular_function	6	2	529	4	5749	0.0447266
GO:0070972	protein localization to endoplasmic reticulum	biological_process	8	2	529	4	5749	0.0447266
GO:0046888	negative regulation of hormone secretion	biological_process	10	2	529	4	5749	0.0447266
GO:0051099	positive regulation of binding	biological_process	6	2	529	4	5749	0.0447266
GO:0032419	extrinsic component of lysosome membrane	cellular_component	13	2	529	4	5749	0.0447266
GO:0004908	interleukin-1 receptor activity	molecular_function	7	2	529	4	5749	0.0447266
GO:0008311	double-stranded DNA 3'-5' exodeoxyribonuclease activity	molecular_function	11	2	529	4	5749	0.0447266
GO:0019809	spermidine binding	molecular_function	5	2	529	4	5749	0.0447266
GO:0046527	glucosyltransferase activity	molecular_function	7	2	529	4	5749	0.0447266
GO:0060674	placenta blood vessel development	biological_process	7	2	529	4	5749	0.0447266
GO:0030516	regulation of axon extension	biological_process	9	2	529	4	5749	0.0447266
GO:0048672	positive regulation of collateral sprouting	biological_process	9	2	529	4	5749	0.0447266
GO:0043023	ribosomal large subunit binding	molecular_function	5	2	529	4	5749	0.0447266
GO:0046626	regulation of insulin receptor signaling pathway	biological_process	11	2	529	4	5749	0.0447266
GO:0016574	histone ubiquitination	biological_process	9	2	529	4	5749	0.0447266
GO:0043367	CD4-positive, alpha-beta T cell differentiation	biological_process	11	2	529	4	5749	0.0447266
GO:0001660	fever generation	biological_process	8	2	529	4	5749	0.0447266
GO:0034140	negative regulation of toll-like receptor 3 signaling pathway	biological_process	11	2	529	4	5749	0.0447266
GO:0043517	positive regulation of DNA damage response, signal transduction by p53 class mediator	biological_process	11	2	529	4	5749	0.0447266
GO:0004708	MAP kinase kinase activity	molecular_function	9	2	529	4	5749	0.0447266
GO:0046935	1-phosphatidylinositol-3-kinase regulator activity	molecular_function	6	2	529	4	5749	0.0447266
GO:0045943	positive regulation of transcription from RNA polymerase I promoter	biological_process	13	2	529	4	5749	0.0447266
GO:0021589	cerebellum structural organization	biological_process	13	2	529	4	5749	0.0447266
GO:0046703	natural killer cell lectin-like receptor binding	molecular_function	6	2	529	4	5749	0.0447266
GO:0050869	negative regulation of B cell activation	biological_process	8	2	529	4	5749	0.0447266
GO:0048312	intracellular distribution of mitochondria	biological_process	7	2	529	4	5749	0.0447266
GO:0002947	tumor necrosis factor receptor superfamily complex	cellular_component	6	2	529	4	5749	0.0447266
GO:0045926	negative regulation of growth	biological_process	5	2	529	4	5749	0.0447266
GO:0014909	smooth muscle cell migration	biological_process	9	2	529	4	5749	0.0447266
GO:0097322	7SK snRNA binding	molecular_function	8	2	529	4	5749	0.0447266
GO:2001032	regulation of double-strand break repair via nonhomologous end joining	biological_process	12	2	529	4	5749	0.0447266
GO:0006529	asparagine biosynthetic process	biological_process	8	2	529	4	5749	0.0447266
GO:0008093	cytoskeletal adaptor activity	molecular_function	6	2	529	4	5749	0.0447266
GO:0061724	lipophagy	NA	NA	2	529	4	5749	0.0447266
GO:0001963	synaptic transmission, dopaminergic	biological_process	9	2	529	4	5749	0.0447266
GO:0033127	regulation of histone phosphorylation	biological_process	10	2	529	4	5749	0.0447266
GO:0042267	natural killer cell mediated cytotoxicity	biological_process	5	2	529	4	5749	0.0447266
GO:0044753	amphisome	cellular_component	11	2	529	4	5749	0.0447266
GO:0008278	cohesin complex	cellular_component	11	2	529	4	5749	0.0447266
GO:0007007	inner mitochondrial membrane organization	biological_process	7	2	529	4	5749	0.0447266
GO:0007174	epidermal growth factor catabolic process	biological_process	8	2	529	4	5749	0.0447266
GO:0070884	regulation of calcineurin-NFAT signaling cascade	biological_process	11	2	529	4	5749	0.0447266
GO:0035437	maintenance of protein localization in endoplasmic reticulum	biological_process	8	2	529	4	5749	0.0447266
GO:0003256	regulation of transcription from RNA polymerase II promoter involved in myocardial precursor cell differentiation	biological_process	14	2	529	4	5749	0.0447266
GO:0003909	DNA ligase activity	molecular_function	6	2	529	4	5749	0.0447266
GO:0004066	asparagine synthase (glutamine-hydrolyzing) activity	molecular_function	7	2	529	4	5749	0.0447266
GO:0001739	sex chromatin	cellular_component	15	2	529	4	5749	0.0447266
GO:0035252	UDP-xylosyltransferase activity	molecular_function	7	2	529	4	5749	0.0447266
GO:0000002	mitochondrial genome maintenance	biological_process	6	2	529	4	5749	0.0447266
GO:0008309	double-stranded DNA exodeoxyribonuclease activity	molecular_function	10	2	529	4	5749	0.0447266
GO:2000172	regulation of branching morphogenesis of a nerve	biological_process	7	2	529	4	5749	0.0447266
GO:0001869	negative regulation of complement activation, lectin pathway	biological_process	8	2	529	4	5749	0.0447266
GO:0051983	regulation of chromosome segregation	biological_process	6	2	529	4	5749	0.0447266
GO:0003279	cardiac septum development	biological_process	10	2	529	4	5749	0.0447266
GO:0071228	cellular response to tumor cell	biological_process	6	2	529	4	5749	0.0447266
GO:0070695	FHF complex	cellular_component	9	2	529	4	5749	0.0447266
GO:0035234	ectopic germ cell programmed cell death	biological_process	6	2	529	4	5749	0.0447266
GO:0034349	glial cell apoptotic process	biological_process	9	2	529	4	5749	0.0447266
GO:2000177	regulation of neural precursor cell proliferation	biological_process	6	2	529	4	5749	0.0447266
GO:0048820	hair follicle maturation	biological_process	11	2	529	4	5749	0.0447266
GO:0046688	response to copper ion	biological_process	7	2	529	4	5749	0.0447266
GO:0004053	arginase activity	molecular_function	7	2	529	4	5749	0.0447266
GO:0007296	vitellogenesis	biological_process	7	2	529	4	5749	0.0447266
GO:0008053	mitochondrial fusion	biological_process	6	2	529	4	5749	0.0447266
GO:2000301	negative regulation of synaptic vesicle exocytosis	biological_process	11	2	529	4	5749	0.0447266
GO:0008631	intrinsic apoptotic signaling pathway in response to oxidative stress	biological_process	9	2	529	4	5749	0.0447266
GO:0048256	flap endonuclease activity	molecular_function	9	2	529	4	5749	0.0447266
GO:0032495	response to muramyl dipeptide	biological_process	7	2	529	4	5749	0.0447266
GO:0070814	hydrogen sulfide biosynthetic process	biological_process	7	2	529	4	5749	0.0447266
GO:0002193	MAML1-RBP-Jkappa- ICN1 complex	cellular_component	5	2	529	4	5749	0.0447266
GO:0032740	positive regulation of interleukin-17 production	biological_process	8	2	529	4	5749	0.0447266
GO:0021537	telencephalon development	biological_process	11	2	529	4	5749	0.0447266
GO:0043551	regulation of phosphatidylinositol 3-kinase activity	biological_process	9	2	529	4	5749	0.0447266
GO:0008199	ferric iron binding	molecular_function	9	2	529	4	5749	0.0447266
GO:0031545	peptidyl-proline 4-dioxygenase activity	molecular_function	8	2	529	4	5749	0.0447266
GO:2000347	positive regulation of hepatocyte proliferation	biological_process	7	2	529	4	5749	0.0447266
GO:0017034	Rap guanyl-nucleotide exchange factor activity	molecular_function	5	2	529	4	5749	0.0447266
GO:0061156	pulmonary artery morphogenesis	biological_process	11	2	529	4	5749	0.0447266
GO:0010603	regulation of cytoplasmic mRNA processing body assembly	biological_process	7	2	529	4	5749	0.0447266
GO:1902310	positive regulation of peptidyl-serine dephosphorylation	biological_process	11	2	529	4	5749	0.0447266
GO:0055013	cardiac muscle cell development	biological_process	9	2	529	4	5749	0.0447266
GO:0090383	phagosome acidification	biological_process	6	2	529	4	5749	0.0447266
GO:0016890	site-specific endodeoxyribonuclease activity, specific for altered base	molecular_function	9	2	529	4	5749	0.0447266
GO:1903361	protein localization to basolateral plasma membrane	biological_process	7	2	529	4	5749	0.0447266
GO:0010571	positive regulation of nuclear cell cycle DNA replication	biological_process	13	2	529	4	5749	0.0447266
GO:0006427	histidyl-tRNA aminoacylation	biological_process	13	2	529	4	5749	0.0447266
GO:0015760	glucose-6-phosphate transport	biological_process	7	2	529	4	5749	0.0447266
GO:0007009	plasma membrane organization	biological_process	5	2	529	4	5749	0.0447266
GO:0004622	lysophospholipase activity	molecular_function	8	2	529	4	5749	0.0447266
GO:0045145	single-stranded DNA 5'-3' exodeoxyribonuclease activity	molecular_function	11	2	529	4	5749	0.0447266
GO:0061001	regulation of dendritic spine morphogenesis	biological_process	10	2	529	4	5749	0.0447266
GO:0008290	F-actin capping protein complex	cellular_component	11	2	529	4	5749	0.0447266
GO:0045086	positive regulation of interleukin-2 biosynthetic process	biological_process	9	2	529	4	5749	0.0447266
GO:0001609	G-protein coupled adenosine receptor activity	molecular_function	7	2	529	4	5749	0.0447266
GO:0032918	spermidine acetylation	biological_process	10	2	529	4	5749	0.0447266
GO:0002677	negative regulation of chronic inflammatory response	biological_process	9	2	529	4	5749	0.0447266
GO:0030575	nuclear body organization	biological_process	6	2	529	4	5749	0.0447266
GO:0061419	positive regulation of transcription from RNA polymerase II promoter in response to hypoxia	biological_process	15	2	529	4	5749	0.0447266
GO:1901585	regulation of acid-sensing ion channel activity	biological_process	10	2	529	4	5749	0.0447266
GO:0001222	transcription corepressor binding	molecular_function	7	2	529	4	5749	0.0447266
GO:0008970	phosphatidylcholine 1-acylhydrolase activity	molecular_function	8	2	529	4	5749	0.0447266
GO:0070820	tertiary granule	cellular_component	12	2	529	4	5749	0.0447266
GO:0006525	arginine metabolic process	biological_process	9	2	529	4	5749	0.0447266
GO:2000779	regulation of double-strand break repair	biological_process	11	2	529	4	5749	0.0447266
GO:0045616	regulation of keratinocyte differentiation	biological_process	10	2	529	4	5749	0.0447266
GO:0070087	chromo shadow domain binding	molecular_function	6	2	529	4	5749	0.0447266
GO:0071879	positive regulation of adrenergic receptor signaling pathway	biological_process	11	2	529	4	5749	0.0447266
GO:0004821	histidine-tRNA ligase activity	molecular_function	8	2	529	4	5749	0.0447266
GO:0045577	regulation of B cell differentiation	biological_process	10	2	529	4	5749	0.0447266
GO:1905394	retromer complex binding	NA	NA	2	529	4	5749	0.0447266
GO:0046716	muscle cell cellular homeostasis	biological_process	6	2	529	4	5749	0.0447266
GO:0035562	negative regulation of chromatin binding	biological_process	7	2	529	4	5749	0.0447266
GO:0071535	RING-like zinc finger domain binding	molecular_function	6	2	529	4	5749	0.0447266
GO:0030279	negative regulation of ossification	biological_process	7	2	529	4	5749	0.0447266
GO:1901857	positive regulation of cellular respiration	biological_process	9	2	529	4	5749	0.0447266
GO:0019430	removal of superoxide radicals	biological_process	7	2	529	4	5749	0.0447266
GO:0016446	somatic hypermutation of immunoglobulin genes	biological_process	6	2	529	4	5749	0.0447266
GO:0012501	programmed cell death	biological_process	6	2	529	4	5749	0.0447266
GO:0007220	Notch receptor processing	biological_process	7	2	529	4	5749	0.0447266
GO:0004145	diamine N-acetyltransferase activity	molecular_function	9	2	529	4	5749	0.0447266
GO:0060080	inhibitory postsynaptic potential	biological_process	9	2	529	4	5749	0.0447266
GO:1903984	positive regulation of TRAIL-activated apoptotic signaling pathway	NA	NA	2	529	4	5749	0.0447266
GO:0045132	meiotic chromosome segregation	biological_process	6	2	529	4	5749	0.0447266
GO:0000050	urea cycle	biological_process	8	2	529	4	5749	0.0447266
GO:0003157	endocardium development	biological_process	9	2	529	4	5749	0.0447266
GO:0001894	tissue homeostasis	biological_process	6	2	529	4	5749	0.0447266
GO:0090394	negative regulation of excitatory postsynaptic potential	biological_process	10	2	529	4	5749	0.0447266
GO:0019344	cysteine biosynthetic process	biological_process	9	2	529	4	5749	0.0447266
GO:0006910	phagocytosis, recognition	biological_process	6	2	529	4	5749	0.0447266
GO:0045088	regulation of innate immune response	biological_process	6	2	529	4	5749	0.0447266
GO:0046599	regulation of centriole replication	biological_process	12	2	529	4	5749	0.0447266
GO:0046661	male sex differentiation	biological_process	6	2	529	4	5749	0.0447266
GO:1901797	negative regulation of signal transduction by p53 class mediator	biological_process	10	2	529	4	5749	0.0447266
GO:0097504	Gemini of coiled bodies	cellular_component	14	2	529	4	5749	0.0447266
GO:0001106	RNA polymerase II transcription corepressor activity	molecular_function	7	2	529	4	5749	0.0447266
GO:0048733	sebaceous gland development	biological_process	9	2	529	4	5749	0.0447266
GO:0042589	zymogen granule membrane	cellular_component	13	2	529	4	5749	0.0447266
GO:0030983	mismatched DNA binding	molecular_function	9	2	529	4	5749	0.0447266
GO:0031205	endoplasmic reticulum Sec complex	cellular_component	12	2	529	4	5749	0.0447266
GO:0032819	positive regulation of natural killer cell proliferation	biological_process	9	2	529	4	5749	0.0447266
GO:0008284	positive regulation of cell proliferation	biological_process	5	19	529	137	5749	0.0447588
GO:0030176	integral component of endoplasmic reticulum membrane	cellular_component	13	8	529	44	5749	0.0447744
GO:0030308	negative regulation of cell growth	biological_process	7	8	529	44	5749	0.0447744
GO:0001948	glycoprotein binding	molecular_function	5	6	529	29	5749	0.0450657
GO:0044325	ion channel binding	molecular_function	5	6	529	29	5749	0.0450657
GO:0006508	proteolysis	biological_process	6	30	529	238	5749	0.0453245
GO:0005622	intracellular	cellular_component	5	63	529	558	5749	0.0455331
GO:0042632	cholesterol homeostasis	biological_process	9	5	529	22	5749	0.0457418
GO:0034599	cellular response to oxidative stress	biological_process	6	5	529	22	5749	0.0457418
GO:0030529	intracellular ribonucleoprotein complex	cellular_component	7	16	529	111	5749	0.0462162
GO:0005886	plasma membrane	cellular_component	5	81	529	739	5749	0.046446
GO:0006915	apoptotic process	biological_process	7	12	529	77	5749	0.0473505
GO:0000776	kinetochore	cellular_component	9	7	529	37	5749	0.0486945
GO:0006887	exocytosis	biological_process	6	6	529	30	5749	0.0521333
GO:0002039	p53 binding	molecular_function	5	6	529	30	5749	0.0521333
GO:0003779	actin binding	molecular_function	6	15	529	104	5749	0.0522374
GO:0003824	catalytic activity	molecular_function	3	27	529	213	5749	0.0524237
GO:0004896	cytokine receptor activity	molecular_function	6	4	529	16	5749	0.052836
GO:0097192	extrinsic apoptotic signaling pathway in absence of ligand	biological_process	9	4	529	16	5749	0.052836
GO:0030426	growth cone	cellular_component	6	4	529	16	5749	0.052836
GO:0051289	protein homotetramerization	biological_process	10	5	529	23	5749	0.0541965
GO:0010976	positive regulation of neuron projection development	biological_process	8	5	529	23	5749	0.0541965
GO:0007157	heterophilic cell-cell adhesion via plasma membrane cell adhesion molecules	biological_process	7	5	529	23	5749	0.0541965
GO:0000122	negative regulation of transcription from RNA polymerase II promoter	biological_process	12	32	529	261	5749	0.054646
GO:0001843	neural tube closure	biological_process	12	7	529	38	5749	0.0551659
GO:0043005	neuron projection	cellular_component	6	7	529	38	5749	0.0551659
GO:0000922	spindle pole	cellular_component	10	7	529	38	5749	0.0551659
GO:0061024	membrane organization	biological_process	5	3	529	10	5749	0.056964
GO:0007281	germ cell development	biological_process	6	3	529	10	5749	0.056964
GO:0060444	branching involved in mammary gland duct morphogenesis	biological_process	8	3	529	10	5749	0.056964
GO:0005520	insulin-like growth factor binding	molecular_function	6	3	529	10	5749	0.056964
GO:0006983	ER overload response	biological_process	8	3	529	10	5749	0.056964
GO:0007094	mitotic spindle assembly checkpoint	biological_process	15	3	529	10	5749	0.056964
GO:0004713	protein tyrosine kinase activity	molecular_function	8	6	529	31	5749	0.0598388
GO:0050727	regulation of inflammatory response	biological_process	7	6	529	31	5749	0.0598388
GO:0005874	microtubule	cellular_component	11	10	529	63	5749	0.0601299
GO:0031398	positive regulation of protein ubiquitination	biological_process	12	5	529	24	5749	0.0634946
GO:0042733	embryonic digit morphogenesis	biological_process	10	5	529	24	5749	0.0634946
GO:0001756	somitogenesis	biological_process	9	4	529	17	5749	0.0642519
GO:0004114	3',5'-cyclic-nucleotide phosphodiesterase activity	molecular_function	9	4	529	17	5749	0.0642519
GO:0006635	fatty acid beta-oxidation	biological_process	10	4	529	17	5749	0.0642519
GO:0000184	nuclear-transcribed mRNA catabolic process, nonsense-mediated decay	biological_process	11	4	529	17	5749	0.0642519
GO:0000788	nuclear nucleosome	cellular_component	13	4	529	17	5749	0.0642519
GO:0097190	apoptotic signaling pathway	biological_process	7	4	529	17	5749	0.0642519
GO:0045202	synapse	cellular_component	3	10	529	64	5749	0.065692
GO:0070373	negative regulation of ERK1 and ERK2 cascade	biological_process	12	6	529	32	5749	0.0681858
GO:0008285	negative regulation of cell proliferation	biological_process	5	15	529	108	5749	0.0685047
GO:0043235	receptor complex	cellular_component	5	7	529	40	5749	0.0696458
GO:0046696	lipopolysaccharide receptor complex	cellular_component	7	2	529	5	5749	0.0700607
GO:0070940	dephosphorylation of RNA polymerase II C-terminal domain	biological_process	13	2	529	5	5749	0.0700607
GO:0060982	coronary artery morphogenesis	biological_process	11	2	529	5	5749	0.0700607
GO:0007406	negative regulation of neuroblast proliferation	biological_process	10	2	529	5	5749	0.0700607
GO:0003214	cardiac left ventricle morphogenesis	biological_process	12	2	529	5	5749	0.0700607
GO:1903542	negative regulation of exosomal secretion	biological_process	9	2	529	5	5749	0.0700607
GO:0001882	nucleoside binding	molecular_function	5	2	529	5	5749	0.0700607
GO:0002455	humoral immune response mediated by circulating immunoglobulin	biological_process	9	2	529	5	5749	0.0700607
GO:0033276	transcription factor TFTC complex	cellular_component	10	2	529	5	5749	0.0700607
GO:0035994	response to muscle stretch	biological_process	6	2	529	5	5749	0.0700607
GO:0034393	positive regulation of smooth muscle cell apoptotic process	biological_process	12	2	529	5	5749	0.0700607
GO:0015891	siderophore transport	biological_process	7	2	529	5	5749	0.0700607
GO:0030162	regulation of proteolysis	biological_process	7	2	529	5	5749	0.0700607
GO:0055008	cardiac muscle tissue morphogenesis	biological_process	10	2	529	5	5749	0.0700607
GO:0031253	cell projection membrane	cellular_component	7	2	529	5	5749	0.0700607
GO:0002042	cell migration involved in sprouting angiogenesis	biological_process	12	2	529	5	5749	0.0700607
GO:0008312	7S RNA binding	molecular_function	7	2	529	5	5749	0.0700607
GO:1990090	cellular response to nerve growth factor stimulus	biological_process	8	2	529	5	5749	0.0700607
GO:0002634	regulation of germinal center formation	biological_process	8	2	529	5	5749	0.0700607
GO:0006616	SRP-dependent cotranslational protein targeting to membrane, translocation	biological_process	8	2	529	5	5749	0.0700607
GO:0009968	negative regulation of signal transduction	biological_process	8	2	529	5	5749	0.0700607
GO:0071732	cellular response to nitric oxide	biological_process	8	2	529	5	5749	0.0700607
GO:0048679	regulation of axon regeneration	biological_process	9	2	529	5	5749	0.0700607
GO:0072678	T cell migration	biological_process	6	2	529	5	5749	0.0700607
GO:0051782	negative regulation of cell division	biological_process	7	2	529	5	5749	0.0700607
GO:0010917	negative regulation of mitochondrial membrane potential	biological_process	7	2	529	5	5749	0.0700607
GO:2001271	negative regulation of cysteine-type endopeptidase activity involved in execution phase of apoptosis	biological_process	14	2	529	5	5749	0.0700607
GO:0032071	regulation of endodeoxyribonuclease activity	biological_process	11	2	529	5	5749	0.0700607
GO:0003198	epithelial to mesenchymal transition involved in endocardial cushion formation	biological_process	12	2	529	5	5749	0.0700607
GO:0036016	cellular response to interleukin-3	biological_process	8	2	529	5	5749	0.0700607
GO:0006892	post-Golgi vesicle-mediated transport	biological_process	7	2	529	5	5749	0.0700607
GO:0035313	wound healing, spreading of epidermal cells	biological_process	9	2	529	5	5749	0.0700607
GO:0032211	negative regulation of telomere maintenance via telomerase	biological_process	13	2	529	5	5749	0.0700607
GO:0032703	negative regulation of interleukin-2 production	biological_process	8	2	529	5	5749	0.0700607
GO:0010739	positive regulation of protein kinase A signaling	biological_process	10	2	529	5	5749	0.0700607
GO:0043583	ear development	biological_process	9	2	529	5	5749	0.0700607
GO:0005786	signal recognition particle, endoplasmic reticulum targeting	cellular_component	10	2	529	5	5749	0.0700607
GO:0070417	cellular response to cold	biological_process	6	2	529	5	5749	0.0700607
GO:0034375	high-density lipoprotein particle remodeling	biological_process	7	2	529	5	5749	0.0700607
GO:0050715	positive regulation of cytokine secretion	biological_process	9	2	529	5	5749	0.0700607
GO:1903206	negative regulation of hydrogen peroxide-induced cell death	biological_process	9	2	529	5	5749	0.0700607
GO:1990050	phosphatidic acid transporter activity	molecular_function	7	2	529	5	5749	0.0700607
GO:0090162	establishment of epithelial cell polarity	biological_process	7	2	529	5	5749	0.0700607
GO:0006198	cAMP catabolic process	biological_process	12	2	529	5	5749	0.0700607
GO:0003688	DNA replication origin binding	molecular_function	8	2	529	5	5749	0.0700607
GO:0001922	B-1 B cell homeostasis	biological_process	7	2	529	5	5749	0.0700607
GO:0042274	ribosomal small subunit biogenesis	biological_process	7	2	529	5	5749	0.0700607
GO:0000796	condensin complex	cellular_component	11	2	529	5	5749	0.0700607
GO:0048500	signal recognition particle	cellular_component	9	2	529	5	5749	0.0700607
GO:0043220	Schmidt-Lanterman incisure	cellular_component	7	2	529	5	5749	0.0700607
GO:0060088	auditory receptor cell stereocilium organization	biological_process	7	2	529	5	5749	0.0700607
GO:0090080	positive regulation of MAPKKK cascade by fibroblast growth factor receptor signaling pathway	biological_process	12	2	529	5	5749	0.0700607
GO:2000785	regulation of autophagosome assembly	biological_process	9	2	529	5	5749	0.0700607
GO:0043011	myeloid dendritic cell differentiation	biological_process	9	2	529	5	5749	0.0700607
GO:0001973	adenosine receptor signaling pathway	biological_process	10	2	529	5	5749	0.0700607
GO:0032725	positive regulation of granulocyte macrophage colony-stimulating factor production	biological_process	8	2	529	5	5749	0.0700607
GO:0006627	protein processing involved in protein targeting to mitochondrion	biological_process	8	2	529	5	5749	0.0700607
GO:1902902	negative regulation of autophagosome assembly	biological_process	9	2	529	5	5749	0.0700607
GO:0035308	negative regulation of protein dephosphorylation	biological_process	10	2	529	5	5749	0.0700607
GO:0097035	regulation of membrane lipid distribution	biological_process	5	2	529	5	5749	0.0700607
GO:0042582	azurophil granule	cellular_component	13	2	529	5	5749	0.0700607
GO:0035102	PRC1 complex	cellular_component	9	2	529	5	5749	0.0700607
GO:0071467	cellular response to pH	biological_process	6	2	529	5	5749	0.0700607
GO:0010693	negative regulation of alkaline phosphatase activity	biological_process	11	2	529	5	5749	0.0700607
GO:0006664	glycolipid metabolic process	biological_process	7	2	529	5	5749	0.0700607
GO:0050732	negative regulation of peptidyl-tyrosine phosphorylation	biological_process	10	2	529	5	5749	0.0700607
GO:0008298	intracellular mRNA localization	biological_process	6	2	529	5	5749	0.0700607
GO:0010738	regulation of protein kinase A signaling	biological_process	9	2	529	5	5749	0.0700607
GO:0016322	neuron remodeling	biological_process	12	2	529	5	5749	0.0700607
GO:0097531	mast cell migration	biological_process	6	2	529	5	5749	0.0700607
GO:0007098	centrosome cycle	biological_process	9	2	529	5	5749	0.0700607
GO:0001975	response to amphetamine	biological_process	7	2	529	5	5749	0.0700607
GO:0050431	transforming growth factor beta binding	molecular_function	6	2	529	5	5749	0.0700607
GO:0019076	viral release from host cell	biological_process	7	2	529	5	5749	0.0700607
GO:0031931	TORC1 complex	cellular_component	8	2	529	5	5749	0.0700607
GO:0045429	positive regulation of nitric oxide biosynthetic process	biological_process	9	2	529	5	5749	0.0700607
GO:0045717	negative regulation of fatty acid biosynthetic process	biological_process	11	2	529	5	5749	0.0700607
GO:0048747	muscle fiber development	biological_process	10	2	529	5	5749	0.0700607
GO:0002437	inflammatory response to antigenic stimulus	biological_process	5	2	529	5	5749	0.0700607
GO:0051142	positive regulation of NK T cell proliferation	biological_process	11	2	529	5	5749	0.0700607
GO:0043219	lateral loop	cellular_component	6	2	529	5	5749	0.0700607
GO:0006900	membrane budding	biological_process	6	2	529	5	5749	0.0700607
GO:0033173	calcineurin-NFAT signaling cascade	biological_process	10	2	529	5	5749	0.0700607
GO:0016514	SWI/SNF complex	cellular_component	13	2	529	5	5749	0.0700607
GO:0001765	membrane raft assembly	biological_process	6	2	529	5	5749	0.0700607
GO:2001140	positive regulation of phospholipid transport	biological_process	10	2	529	5	5749	0.0700607
GO:0042711	maternal behavior	biological_process	8	2	529	5	5749	0.0700607
GO:0042554	superoxide anion generation	biological_process	7	2	529	5	5749	0.0700607
GO:0017154	semaphorin receptor activity	molecular_function	6	2	529	5	5749	0.0700607
GO:0042307	positive regulation of protein import into nucleus	biological_process	6	2	529	5	5749	0.0700607
GO:0035640	exploration behavior	biological_process	5	2	529	5	5749	0.0700607
GO:0001530	lipopolysaccharide binding	molecular_function	5	2	529	5	5749	0.0700607
GO:0050832	defense response to fungus	biological_process	7	2	529	5	5749	0.0700607
GO:0090150	establishment of protein localization to membrane	biological_process	6	2	529	5	5749	0.0700607
GO:0035749	myelin sheath adaxonal region	cellular_component	5	2	529	5	5749	0.0700607
GO:0007144	female meiosis I	biological_process	7	2	529	5	5749	0.0700607
GO:0040008	regulation of growth	biological_process	4	2	529	5	5749	0.0700607
GO:0045840	positive regulation of mitotic nuclear division	biological_process	9	2	529	5	5749	0.0700607
GO:0006801	superoxide metabolic process	biological_process	6	2	529	5	5749	0.0700607
GO:0005041	low-density lipoprotein receptor activity	molecular_function	6	2	529	5	5749	0.0700607
GO:0008156	negative regulation of DNA replication	biological_process	11	2	529	5	5749	0.0700607
GO:0005798	Golgi-associated vesicle	cellular_component	11	2	529	5	5749	0.0700607
GO:0071380	cellular response to prostaglandin E stimulus	biological_process	9	3	529	11	5749	0.0731369
GO:0043984	histone H4-K16 acetylation	biological_process	11	3	529	11	5749	0.0731369
GO:0001942	hair follicle development	biological_process	10	3	529	11	5749	0.0731369
GO:0048856	anatomical structure development	biological_process	4	3	529	11	5749	0.0731369
GO:0009408	response to heat	biological_process	5	3	529	11	5749	0.0731369
GO:2000406	positive regulation of T cell migration	biological_process	8	3	529	11	5749	0.0731369
GO:0060324	face development	biological_process	6	3	529	11	5749	0.0731369
GO:0006461	protein complex assembly	biological_process	7	3	529	11	5749	0.0731369
GO:0043621	protein self-association	molecular_function	5	3	529	11	5749	0.0731369
GO:0030968	endoplasmic reticulum unfolded protein response	biological_process	8	5	529	25	5749	0.073631
GO:0043025	neuronal cell body	cellular_component	6	8	529	49	5749	0.0764533
GO:0016575	histone deacetylation	biological_process	9	4	529	18	5749	0.0768444
GO:0043588	skin development	biological_process	8	4	529	18	5749	0.0768444
GO:0050852	T cell receptor signaling pathway	biological_process	8	4	529	18	5749	0.0768444
GO:0006352	DNA-templated transcription, initiation	biological_process	9	4	529	18	5749	0.0768444
GO:0034765	regulation of ion transmembrane transport	biological_process	7	4	529	18	5749	0.0768444
GO:0050714	positive regulation of protein secretion	biological_process	8	4	529	18	5749	0.0768444
GO:0019882	antigen processing and presentation	biological_process	4	4	529	18	5749	0.0768444
GO:0010506	regulation of autophagy	biological_process	7	4	529	18	5749	0.0768444
GO:0035914	skeletal muscle cell differentiation	biological_process	7	4	529	18	5749	0.0768444
GO:0005814	centriole	cellular_component	10	7	529	41	5749	0.07766
GO:0008283	cell proliferation	biological_process	4	9	529	58	5749	0.0811421
GO:0006334	nucleosome assembly	biological_process	12	8	529	50	5749	0.0840754
GO:0007264	small GTPase mediated signal transduction	biological_process	8	16	529	121	5749	0.0872331
GO:0014068	positive regulation of phosphatidylinositol 3-kinase signaling	biological_process	12	4	529	19	5749	0.0905711
GO:0004518	nuclease activity	molecular_function	6	4	529	19	5749	0.0905711
GO:0071347	cellular response to interleukin-1	biological_process	8	4	529	19	5749	0.0905711
GO:0000186	activation of MAPKK activity	biological_process	13	4	529	19	5749	0.0905711
GO:0050996	positive regulation of lipid catabolic process	biological_process	8	3	529	12	5749	0.0910918
GO:0018345	protein palmitoylation	biological_process	9	3	529	12	5749	0.0910918
GO:0031011	Ino80 complex	cellular_component	8	3	529	12	5749	0.0910918
GO:0034451	centriolar satellite	cellular_component	10	3	529	12	5749	0.0910918
GO:0014037	Schwann cell differentiation	biological_process	8	1	529	1	5749	0.092016
GO:0070938	contractile ring	cellular_component	5	1	529	1	5749	0.092016
GO:0060907	positive regulation of macrophage cytokine production	biological_process	10	1	529	1	5749	0.092016
GO:1990379	lipid transport across blood brain barrier	biological_process	6	1	529	1	5749	0.092016
GO:0006430	lysyl-tRNA aminoacylation	biological_process	13	1	529	1	5749	0.092016
GO:0005548	phospholipid transporter activity	molecular_function	6	1	529	1	5749	0.092016
GO:0004824	lysine-tRNA ligase activity	molecular_function	8	1	529	1	5749	0.092016
GO:0004307	ethanolaminephosphotransferase activity	molecular_function	8	1	529	1	5749	0.092016
GO:0008808	cardiolipin synthase activity	molecular_function	8	1	529	1	5749	0.092016
GO:0060563	neuroepithelial cell differentiation	biological_process	9	1	529	1	5749	0.092016
GO:0051977	lysophospholipid transport	biological_process	9	1	529	1	5749	0.092016
GO:0048808	male genitalia morphogenesis	biological_process	8	1	529	1	5749	0.092016
GO:0097431	mitotic spindle pole	cellular_component	11	1	529	1	5749	0.092016
GO:0008251	tRNA-specific adenosine deaminase activity	molecular_function	8	1	529	1	5749	0.092016
GO:0060856	establishment of blood-brain barrier	biological_process	8	1	529	1	5749	0.092016
GO:0051978	lysophospholipid transporter activity	molecular_function	7	1	529	1	5749	0.092016
GO:0033043	regulation of organelle organization	biological_process	5	1	529	1	5749	0.092016
GO:1903438	positive regulation of mitotic cytokinetic process	biological_process	10	1	529	1	5749	0.092016
GO:0030335	positive regulation of cell migration	biological_process	9	9	529	60	5749	0.095967
GO:0010494	cytoplasmic stress granule	cellular_component	10	5	529	27	5749	0.0963629
GO:0022625	cytosolic large ribosomal subunit	cellular_component	11	6	529	35	5749	0.0970473
GO:0031625	ubiquitin protein ligase binding	molecular_function	7	16	529	123	5749	0.09759
GO:0050435	beta-amyloid metabolic process	biological_process	8	2	529	6	5749	0.0988229
GO:0044754	autolysosome	cellular_component	13	2	529	6	5749	0.0988229
GO:0006987	activation of signaling protein activity involved in unfolded protein response	biological_process	10	2	529	6	5749	0.0988229
GO:0045190	isotype switching	biological_process	8	2	529	6	5749	0.0988229
GO:0071578	zinc II ion transmembrane import	biological_process	8	2	529	6	5749	0.0988229
GO:0060216	definitive hemopoiesis	biological_process	7	2	529	6	5749	0.0988229
GO:0046208	spermine catabolic process	biological_process	10	2	529	6	5749	0.0988229
GO:0045792	negative regulation of cell size	biological_process	7	2	529	6	5749	0.0988229
GO:0006306	DNA methylation	biological_process	11	2	529	6	5749	0.0988229
GO:0050810	regulation of steroid biosynthetic process	biological_process	8	2	529	6	5749	0.0988229
GO:0022407	regulation of cell-cell adhesion	biological_process	6	2	529	6	5749	0.0988229
GO:0070986	left/right axis specification	biological_process	9	2	529	6	5749	0.0988229
GO:0070652	HAUS complex	cellular_component	12	2	529	6	5749	0.0988229
GO:0007517	muscle organ development	biological_process	8	2	529	6	5749	0.0988229
GO:0001952	regulation of cell-matrix adhesion	biological_process	7	2	529	6	5749	0.0988229
GO:0006622	protein targeting to lysosome	biological_process	8	2	529	6	5749	0.0988229
GO:0016407	acetyltransferase activity	molecular_function	7	2	529	6	5749	0.0988229
GO:0070830	bicellular tight junction assembly	biological_process	9	2	529	6	5749	0.0988229
GO:0045807	positive regulation of endocytosis	biological_process	7	2	529	6	5749	0.0988229
GO:0080111	DNA demethylation	biological_process	11	2	529	6	5749	0.0988229
GO:0006335	DNA replication-dependent nucleosome assembly	biological_process	13	2	529	6	5749	0.0988229
GO:0097153	cysteine-type endopeptidase activity involved in apoptotic process	molecular_function	9	2	529	6	5749	0.0988229
GO:0070234	positive regulation of T cell apoptotic process	biological_process	13	2	529	6	5749	0.0988229
GO:0031641	regulation of myelination	biological_process	11	2	529	6	5749	0.0988229
GO:0005663	DNA replication factor C complex	cellular_component	12	2	529	6	5749	0.0988229
GO:0030238	male sex determination	biological_process	6	2	529	6	5749	0.0988229
GO:0097150	neuronal stem cell population maintenance	biological_process	10	2	529	6	5749	0.0988229
GO:0070914	UV-damage excision repair	biological_process	10	2	529	6	5749	0.0988229
GO:0051290	protein heterotetramerization	biological_process	10	2	529	6	5749	0.0988229
GO:0022615	protein to membrane docking	biological_process	6	2	529	6	5749	0.0988229
GO:0048608	reproductive structure development	biological_process	5	2	529	6	5749	0.0988229
GO:0038180	nerve growth factor signaling pathway	biological_process	9	2	529	6	5749	0.0988229
GO:0090385	phagosome-lysosome fusion	biological_process	8	2	529	6	5749	0.0988229
GO:0060045	positive regulation of cardiac muscle cell proliferation	biological_process	6	2	529	6	5749	0.0988229
GO:0051044	positive regulation of membrane protein ectodomain proteolysis	biological_process	8	2	529	6	5749	0.0988229
GO:0042119	neutrophil activation	biological_process	7	2	529	6	5749	0.0988229
GO:1903364	positive regulation of cellular protein catabolic process	biological_process	9	2	529	6	5749	0.0988229
GO:0000930	gamma-tubulin complex	cellular_component	10	2	529	6	5749	0.0988229
GO:0035721	intraciliary retrograde transport	biological_process	8	2	529	6	5749	0.0988229
GO:0046966	thyroid hormone receptor binding	molecular_function	8	2	529	6	5749	0.0988229
GO:0030914	STAGA complex	cellular_component	10	2	529	6	5749	0.0988229
GO:0006612	protein targeting to membrane	biological_process	7	2	529	6	5749	0.0988229
GO:0005968	Rab-protein geranylgeranyltransferase complex	cellular_component	9	2	529	6	5749	0.0988229
GO:0034109	homotypic cell-cell adhesion	biological_process	7	2	529	6	5749	0.0988229
GO:0001736	establishment of planar polarity	biological_process	6	2	529	6	5749	0.0988229
GO:0008340	determination of adult lifespan	biological_process	7	2	529	6	5749	0.0988229
GO:0010764	negative regulation of fibroblast migration	biological_process	11	2	529	6	5749	0.0988229
GO:0043995	histone acetyltransferase activity (H4-K5 specific	molecular_function	12	2	529	6	5749	0.0988229
GO:0030552	cAMP binding	molecular_function	9	2	529	6	5749	0.0988229
GO:0048286	lung alveolus development	biological_process	9	2	529	6	5749	0.0988229
GO:0018344	protein geranylgeranylation	biological_process	9	2	529	6	5749	0.0988229
GO:1901888	regulation of cell junction assembly	biological_process	7	2	529	6	5749	0.0988229
GO:0051018	protein kinase A binding	molecular_function	5	2	529	6	5749	0.0988229
GO:0006110	regulation of glycolytic process	biological_process	8	2	529	6	5749	0.0988229
GO:0035912	dorsal aorta morphogenesis	biological_process	12	2	529	6	5749	0.0988229
GO:0045824	negative regulation of innate immune response	biological_process	7	2	529	6	5749	0.0988229
GO:0035312	5'-3' exodeoxyribonuclease activity	molecular_function	10	2	529	6	5749	0.0988229
GO:0007422	peripheral nervous system development	biological_process	8	2	529	6	5749	0.0988229
GO:0015758	glucose transport	biological_process	8	2	529	6	5749	0.0988229
GO:0032797	SMN complex	cellular_component	7	2	529	6	5749	0.0988229
GO:0003823	antigen binding	molecular_function	4	2	529	6	5749	0.0988229
GO:1901214	regulation of neuron death	biological_process	7	2	529	6	5749	0.0988229
GO:0030521	androgen receptor signaling pathway	biological_process	9	2	529	6	5749	0.0988229
GO:0009948	anterior/posterior axis specification	biological_process	9	2	529	6	5749	0.0988229
GO:0046972	histone acetyltransferase activity (H4-K16 specific	molecular_function	12	2	529	6	5749	0.0988229
GO:0055091	phospholipid homeostasis	biological_process	9	2	529	6	5749	0.0988229
GO:0031668	cellular response to extracellular stimulus	biological_process	6	2	529	6	5749	0.0988229
GO:0021680	cerebellar Purkinje cell layer development	biological_process	14	2	529	6	5749	0.0988229
GO:0051754	meiotic sister chromatid cohesion, centromeric	biological_process	9	2	529	6	5749	0.0988229
GO:0033120	positive regulation of RNA splicing	biological_process	11	2	529	6	5749	0.0988229
GO:0001959	regulation of cytokine-mediated signaling pathway	biological_process	9	2	529	6	5749	0.0988229
GO:0021772	olfactory bulb development	biological_process	13	2	529	6	5749	0.0988229
GO:0045740	positive regulation of DNA replication	biological_process	11	2	529	6	5749	0.0988229
GO:0071168	protein localization to chromatin	biological_process	9	2	529	6	5749	0.0988229
GO:0043996	histone acetyltransferase activity (H4-K8 specific	molecular_function	12	2	529	6	5749	0.0988229
GO:0044829	positive regulation by host of viral genome replication	biological_process	10	2	529	6	5749	0.0988229
GO:0097084	vascular smooth muscle cell development	biological_process	10	2	529	6	5749	0.0988229
GO:0035020	regulation of Rac protein signal transduction	biological_process	11	2	529	6	5749	0.0988229
GO:0006556	S-adenosylmethionine biosynthetic process	biological_process	11	2	529	6	5749	0.0988229
GO:0010839	negative regulation of keratinocyte proliferation	biological_process	7	2	529	6	5749	0.0988229
GO:0006596	polyamine biosynthetic process	biological_process	9	2	529	6	5749	0.0988229
GO:0042088	T-helper 1 type immune response	biological_process	7	2	529	6	5749	0.0988229
GO:0034063	stress granule assembly	biological_process	6	2	529	6	5749	0.0988229
GO:0004143	diacylglycerol kinase activity	molecular_function	7	2	529	6	5749	0.0988229
GO:0008373	sialyltransferase activity	molecular_function	6	2	529	6	5749	0.0988229
GO:0051260	protein homooligomerization	biological_process	9	7	529	44	5749	0.104776
GO:0031201	SNARE complex	cellular_component	9	4	529	20	5749	0.105378
GO:0008104	protein localization	biological_process	5	4	529	20	5749	0.105378
GO:0006417	regulation of translation	biological_process	8	4	529	20	5749	0.105378
GO:0005507	copper ion binding	molecular_function	8	4	529	20	5749	0.105378
GO:0045165	cell fate commitment	biological_process	7	4	529	20	5749	0.105378
GO:0007067	mitotic nuclear division	biological_process	7	6	529	36	5749	0.107911
GO:0045766	positive regulation of angiogenesis	biological_process	12	6	529	36	5749	0.107911
GO:0004553	hydrolase activity, hydrolyzing O-glycosyl compounds	molecular_function	6	5	529	28	5749	0.108914
GO:0000502	proteasome complex	cellular_component	7	5	529	28	5749	0.108914
GO:0043565	sequence-specific DNA binding	molecular_function	7	27	529	230	5749	0.109423
GO:0070374	positive regulation of ERK1 and ERK2 cascade	biological_process	12	8	529	53	5749	0.109512
GO:0048812	neuron projection morphogenesis	biological_process	7	3	529	13	5749	0.110662
GO:0007159	leukocyte cell-cell adhesion	biological_process	7	3	529	13	5749	0.110662
GO:0005654	nucleoplasm	cellular_component	11	79	529	756	5749	0.114879
GO:0005887	integral component of plasma membrane	cellular_component	7	31	529	271	5749	0.117321
GO:0009986	cell surface	cellular_component	5	17	529	136	5749	0.118138
GO:0006364	rRNA processing	biological_process	11	6	529	37	5749	0.119373
GO:0004888	transmembrane signaling receptor activity	molecular_function	5	6	529	37	5749	0.119373
GO:0006310	DNA recombination	biological_process	9	4	529	21	5749	0.121202
GO:0010008	endosome membrane	cellular_component	11	4	529	21	5749	0.121202
GO:0045111	intermediate filament cytoskeleton	cellular_component	10	4	529	21	5749	0.121202
GO:2001235	positive regulation of apoptotic signaling pathway	biological_process	9	4	529	21	5749	0.121202
GO:0002376	immune system process	biological_process	3	5	529	29	5749	0.122216
GO:0032091	negative regulation of protein binding	biological_process	7	5	529	29	5749	0.122216
GO:0045860	positive regulation of protein kinase activity	biological_process	11	5	529	29	5749	0.122216
GO:0023014	signal transduction by protein phosphorylation	biological_process	8	7	529	46	5749	0.125344
GO:0016604	nuclear body	cellular_component	13	13	529	100	5749	0.126823
GO:0005794	Golgi apparatus	cellular_component	9	34	529	303	5749	0.126886
GO:0005179	hormone activity	molecular_function	6	2	529	7	5749	0.13017
GO:0034237	protein kinase A regulatory subunit binding	molecular_function	6	2	529	7	5749	0.13017
GO:0005112	Notch binding	molecular_function	6	2	529	7	5749	0.13017
GO:0006614	SRP-dependent cotranslational protein targeting to membrane	biological_process	9	2	529	7	5749	0.13017
GO:0051402	neuron apoptotic process	biological_process	9	2	529	7	5749	0.13017
GO:2000391	positive regulation of neutrophil extravasation	biological_process	8	2	529	7	5749	0.13017
GO:0044782	cilium organization	biological_process	6	2	529	7	5749	0.13017
GO:0004857	enzyme inhibitor activity	molecular_function	4	2	529	7	5749	0.13017
GO:1990380	Lys48-specific deubiquitinase activity	molecular_function	10	2	529	7	5749	0.13017
GO:0044242	cellular lipid catabolic process	biological_process	6	2	529	7	5749	0.13017
GO:0001953	negative regulation of cell-matrix adhesion	biological_process	7	2	529	7	5749	0.13017
GO:0048193	Golgi vesicle transport	biological_process	6	2	529	7	5749	0.13017
GO:0030016	myofibril	cellular_component	10	2	529	7	5749	0.13017
GO:0048513	animal organ development	biological_process	7	2	529	7	5749	0.13017
GO:0001895	retina homeostasis	biological_process	7	2	529	7	5749	0.13017
GO:0043982	histone H4-K8 acetylation	biological_process	11	2	529	7	5749	0.13017
GO:0071320	cellular response to cAMP	biological_process	8	2	529	7	5749	0.13017
GO:0043068	positive regulation of programmed cell death	biological_process	8	2	529	7	5749	0.13017
GO:0042825	TAP complex	cellular_component	15	2	529	7	5749	0.13017
GO:0050768	negative regulation of neurogenesis	biological_process	10	2	529	7	5749	0.13017
GO:0071947	protein deubiquitination involved in ubiquitin-dependent protein catabolic process	biological_process	10	2	529	7	5749	0.13017
GO:0045647	negative regulation of erythrocyte differentiation	biological_process	8	2	529	7	5749	0.13017
GO:0015197	peptide transporter activity	molecular_function	5	2	529	7	5749	0.13017
GO:0042474	middle ear morphogenesis	biological_process	10	2	529	7	5749	0.13017
GO:0034198	cellular response to amino acid starvation	biological_process	9	2	529	7	5749	0.13017
GO:0002248	connective tissue replacement involved in inflammatory response wound healing	biological_process	6	2	529	7	5749	0.13017
GO:0048505	regulation of timing of cell differentiation	biological_process	8	2	529	7	5749	0.13017
GO:2000144	positive regulation of DNA-templated transcription, initiation	biological_process	11	2	529	7	5749	0.13017
GO:0097503	sialylation	biological_process	7	2	529	7	5749	0.13017
GO:0009311	oligosaccharide metabolic process	biological_process	7	2	529	7	5749	0.13017
GO:0008217	regulation of blood pressure	biological_process	8	2	529	7	5749	0.13017
GO:1903543	positive regulation of exosomal secretion	biological_process	9	2	529	7	5749	0.13017
GO:0004630	phospholipase D activity	molecular_function	8	2	529	7	5749	0.13017
GO:0070262	peptidyl-serine dephosphorylation	biological_process	9	2	529	7	5749	0.13017
GO:0005637	nuclear inner membrane	cellular_component	8	2	529	7	5749	0.13017
GO:0032515	negative regulation of phosphoprotein phosphatase activity	biological_process	11	2	529	7	5749	0.13017
GO:0009100	glycoprotein metabolic process	biological_process	6	2	529	7	5749	0.13017
GO:1902857	positive regulation of non-motile cilium assembly	biological_process	9	2	529	7	5749	0.13017
GO:0040029	regulation of gene expression, epigenetic	biological_process	8	2	529	7	5749	0.13017
GO:0008157	protein phosphatase 1 binding	molecular_function	8	2	529	7	5749	0.13017
GO:2000178	negative regulation of neural precursor cell proliferation	biological_process	6	2	529	7	5749	0.13017
GO:0019885	antigen processing and presentation of endogenous peptide antigen via MHC class I	biological_process	7	2	529	7	5749	0.13017
GO:0006911	phagocytosis, engulfment	biological_process	6	2	529	7	5749	0.13017
GO:0004115	3',5'-cyclic-AMP phosphodiesterase activity	molecular_function	10	2	529	7	5749	0.13017
GO:1990441	negative regulation of transcription from RNA polymerase II promoter in response to endoplasmic reticulum stress	biological_process	14	2	529	7	5749	0.13017
GO:0015672	monovalent inorganic cation transport	biological_process	7	2	529	7	5749	0.13017
GO:0042755	eating behavior	biological_process	5	2	529	7	5749	0.13017
GO:0044458	motile cilium assembly	biological_process	7	2	529	7	5749	0.13017
GO:0042287	MHC protein binding	molecular_function	6	2	529	7	5749	0.13017
GO:0000791	euchromatin	cellular_component	12	2	529	7	5749	0.13017
GO:0006650	glycerophospholipid metabolic process	biological_process	8	2	529	7	5749	0.13017
GO:0032418	lysosome localization	biological_process	6	2	529	7	5749	0.13017
GO:0005149	interleukin-1 receptor binding	molecular_function	7	2	529	7	5749	0.13017
GO:0007140	male meiosis	biological_process	6	2	529	7	5749	0.13017
GO:0042405	nuclear inclusion body	cellular_component	8	2	529	7	5749	0.13017
GO:0016234	inclusion body	cellular_component	7	2	529	7	5749	0.13017
GO:0006044	N-acetylglucosamine metabolic process	biological_process	8	2	529	7	5749	0.13017
GO:0051894	positive regulation of focal adhesion assembly	biological_process	11	2	529	7	5749	0.13017
GO:0007205	protein kinase C-activating G-protein coupled receptor signaling pathway	biological_process	9	2	529	7	5749	0.13017
GO:0000982	transcription factor activity, RNA polymerase II core promoter proximal region sequence-specific binding	molecular_function	6	2	529	7	5749	0.13017
GO:0035904	aorta development	biological_process	10	2	529	7	5749	0.13017
GO:0016578	histone deubiquitination	biological_process	9	2	529	7	5749	0.13017
GO:0032330	regulation of chondrocyte differentiation	biological_process	8	2	529	7	5749	0.13017
GO:0016591	DNA-directed RNA polymerase II, holoenzyme	cellular_component	10	2	529	7	5749	0.13017
GO:0034605	cellular response to heat	biological_process	6	2	529	7	5749	0.13017
GO:0031065	positive regulation of histone deacetylation	biological_process	11	2	529	7	5749	0.13017
GO:0031116	positive regulation of microtubule polymerization	biological_process	10	2	529	7	5749	0.13017
GO:0001556	oocyte maturation	biological_process	10	2	529	7	5749	0.13017
GO:0060976	coronary vasculature development	biological_process	9	2	529	7	5749	0.13017
GO:0001837	epithelial to mesenchymal transition	biological_process	10	2	529	7	5749	0.13017
GO:1990909	Wnt signalosome	NA	NA	2	529	7	5749	0.13017
GO:0031369	translation initiation factor binding	molecular_function	5	2	529	7	5749	0.13017
GO:0031432	titin binding	molecular_function	6	2	529	7	5749	0.13017
GO:0036094	small molecule binding	molecular_function	4	2	529	7	5749	0.13017
GO:2000273	positive regulation of receptor activity	biological_process	9	2	529	7	5749	0.13017
GO:0043981	histone H4-K5 acetylation	biological_process	11	2	529	7	5749	0.13017
GO:2000377	regulation of reactive oxygen species metabolic process	biological_process	6	2	529	7	5749	0.13017
GO:0002430	complement receptor mediated signaling pathway	biological_process	7	2	529	7	5749	0.13017
GO:0010955	negative regulation of protein processing	biological_process	8	2	529	7	5749	0.13017
GO:0001946	lymphangiogenesis	biological_process	10	2	529	7	5749	0.13017
GO:0030276	clathrin binding	molecular_function	5	3	529	14	5749	0.13167
GO:0030901	midbrain development	biological_process	10	3	529	14	5749	0.13167
GO:0006357	regulation of transcription from RNA polymerase II promoter	biological_process	12	24	529	206	5749	0.133436
GO:0055085	transmembrane transport	biological_process	5	22	529	187	5749	0.135794
GO:0005768	endosome	cellular_component	9	12	529	92	5749	0.136136
GO:0043130	ubiquitin binding	molecular_function	6	5	529	30	5749	0.136232
GO:0030855	epithelial cell differentiation	biological_process	7	5	529	30	5749	0.136232
GO:0004860	protein kinase inhibitor activity	molecular_function	6	5	529	30	5749	0.136232
GO:0050728	negative regulation of inflammatory response	biological_process	8	4	529	22	5749	0.137971
GO:0060548	negative regulation of cell death	biological_process	7	4	529	22	5749	0.137971
GO:0001227	transcriptional repressor activity, RNA polymerase II transcription regulatory region sequence-specific binding	molecular_function	6	4	529	22	5749	0.137971
GO:0000166	nucleotide binding	molecular_function	5	63	529	600	5749	0.138816
GO:0007155	cell adhesion	biological_process	4	18	529	149	5749	0.139121
GO:0019221	cytokine-mediated signaling pathway	biological_process	8	9	529	65	5749	0.13938
GO:0019901	protein kinase binding	molecular_function	7	19	529	159	5749	0.141524
GO:0016337	single organismal cell-cell adhesion	biological_process	6	6	529	39	5749	0.144005
GO:0007186	G-protein coupled receptor signaling pathway	biological_process	8	19	529	160	5749	0.147638
GO:0004725	protein tyrosine phosphatase activity	molecular_function	9	8	529	57	5749	0.149201
GO:0035335	peptidyl-tyrosine dephosphorylation	biological_process	9	8	529	57	5749	0.149201
GO:0090630	activation of GTPase activity	NA	NA	5	529	31	5749	0.150923
GO:0003725	double-stranded RNA binding	molecular_function	7	5	529	31	5749	0.150923
GO:0006281	DNA repair	biological_process	9	12	529	94	5749	0.152282
GO:0030173	integral component of Golgi membrane	cellular_component	13	3	529	15	5749	0.153931
GO:0048306	calcium-dependent protein binding	molecular_function	5	3	529	15	5749	0.153931
GO:0032436	positive regulation of proteasomal ubiquitin-dependent protein catabolic process	biological_process	12	4	529	23	5749	0.155607
GO:0070936	protein K48-linked ubiquitination	biological_process	12	4	529	23	5749	0.155607
GO:0001568	blood vessel development	biological_process	8	4	529	23	5749	0.155607
GO:0042626	ATPase activity, coupled to transmembrane movement of substances	molecular_function	12	4	529	23	5749	0.155607
GO:0097200	cysteine-type endopeptidase activity involved in execution phase of apoptosis	molecular_function	10	2	529	8	5749	0.163386
GO:0032486	Rap protein signal transduction	biological_process	10	2	529	8	5749	0.163386
GO:0071897	DNA biosynthetic process	biological_process	8	2	529	8	5749	0.163386
GO:0080182	histone H3-K4 trimethylation	biological_process	10	2	529	8	5749	0.163386
GO:0045199	maintenance of epithelial cell apical/basal polarity	biological_process	8	2	529	8	5749	0.163386
GO:0048844	artery morphogenesis	biological_process	10	2	529	8	5749	0.163386
GO:0043394	proteoglycan binding	molecular_function	6	2	529	8	5749	0.163386
GO:0048814	regulation of dendrite morphogenesis	biological_process	9	2	529	8	5749	0.163386
GO:0016573	histone acetylation	biological_process	9	2	529	8	5749	0.163386
GO:0010332	response to gamma radiation	biological_process	7	2	529	8	5749	0.163386
GO:0016706	oxidoreductase activity, acting on paired donors, with incorporation or reduction of molecular oxygen, 2-oxoglutarate as one donor, and incorporation of one atom each of oxygen into both donors	molecular_function	6	2	529	8	5749	0.163386
GO:0005230	extracellular ligand-gated ion channel activity	molecular_function	10	2	529	8	5749	0.163386
GO:0003906	DNA-(apurinic or apyrimidinic site) lyase activity	molecular_function	9	2	529	8	5749	0.163386
GO:0031390	Ctf18 RFC-like complex	cellular_component	11	2	529	8	5749	0.163386
GO:0031090	organelle membrane	cellular_component	4	2	529	8	5749	0.163386
GO:0045786	negative regulation of cell cycle	biological_process	6	2	529	8	5749	0.163386
GO:0015833	peptide transport	biological_process	6	2	529	8	5749	0.163386
GO:0005922	connexin complex	cellular_component	7	2	529	8	5749	0.163386
GO:0071949	FAD binding	molecular_function	7	2	529	8	5749	0.163386
GO:0043014	alpha-tubulin binding	molecular_function	7	2	529	8	5749	0.163386
GO:0007569	cell aging	biological_process	5	2	529	8	5749	0.163386
GO:0001782	B cell homeostasis	biological_process	6	2	529	8	5749	0.163386
GO:0051016	barbed-end actin filament capping	biological_process	13	2	529	8	5749	0.163386
GO:0007189	adenylate cyclase-activating G-protein coupled receptor signaling pathway	biological_process	11	2	529	8	5749	0.163386
GO:0034045	pre-autophagosomal structure membrane	cellular_component	10	2	529	8	5749	0.163386
GO:0043691	reverse cholesterol transport	biological_process	8	2	529	8	5749	0.163386
GO:0030819	positive regulation of cAMP biosynthetic process	biological_process	14	2	529	8	5749	0.163386
GO:0016973	poly(A)+ mRNA export from nucleus	biological_process	8	2	529	8	5749	0.163386
GO:0042581	specific granule	cellular_component	12	2	529	8	5749	0.163386
GO:2001234	negative regulation of apoptotic signaling pathway	biological_process	9	2	529	8	5749	0.163386
GO:0035329	hippo signaling	biological_process	8	2	529	8	5749	0.163386
GO:0036302	atrioventricular canal development	biological_process	9	2	529	8	5749	0.163386
GO:0015440	peptide-transporting ATPase activity	molecular_function	13	2	529	8	5749	0.163386
GO:0030286	dynein complex	cellular_component	12	2	529	8	5749	0.163386
GO:0042754	negative regulation of circadian rhythm	biological_process	6	2	529	8	5749	0.163386
GO:0046540	U4/U6 x U5 tri-snRNP complex	cellular_component	9	2	529	8	5749	0.163386
GO:0046039	GTP metabolic process	biological_process	12	2	529	8	5749	0.163386
GO:0007221	positive regulation of transcription of Notch receptor target	biological_process	14	2	529	8	5749	0.163386
GO:0045670	regulation of osteoclast differentiation	biological_process	10	2	529	8	5749	0.163386
GO:1990138	neuron projection extension	biological_process	7	2	529	8	5749	0.163386
GO:0090398	cellular senescence	biological_process	6	2	529	8	5749	0.163386
GO:0034388	Pwp2p-containing subcomplex of 90S preribosome	cellular_component	10	2	529	8	5749	0.163386
GO:0008589	regulation of smoothened signaling pathway	biological_process	9	2	529	8	5749	0.163386
GO:0010804	negative regulation of tumor necrosis factor-mediated signaling pathway	biological_process	11	2	529	8	5749	0.163386
GO:0005154	epidermal growth factor receptor binding	molecular_function	7	2	529	8	5749	0.163386
GO:1900264	positive regulation of DNA-directed DNA polymerase activity	biological_process	11	2	529	8	5749	0.163386
GO:0003689	DNA clamp loader activity	molecular_function	13	2	529	8	5749	0.163386
GO:0000800	lateral element	cellular_component	14	2	529	8	5749	0.163386
GO:0046718	viral entry into host cell	biological_process	7	2	529	8	5749	0.163386
GO:0032148	activation of protein kinase B activity	biological_process	13	2	529	8	5749	0.163386
GO:0001649	osteoblast differentiation	biological_process	7	5	529	32	5749	0.166245
GO:0030246	carbohydrate binding	molecular_function	4	5	529	32	5749	0.166245
GO:0030324	lung development	biological_process	8	5	529	32	5749	0.166245
GO:0003713	transcription coactivator activity	molecular_function	6	9	529	68	5749	0.169536
GO:0004222	metalloendopeptidase activity	molecular_function	8	8	529	59	5749	0.171341
GO:0051015	actin filament binding	molecular_function	7	7	529	50	5749	0.171991
GO:0004702	signal transducer, downstream of receptor, with serine/threonine kinase activity	molecular_function	9	7	529	50	5749	0.171991
GO:0030512	negative regulation of transforming growth factor beta receptor signaling pathway	biological_process	12	4	529	24	5749	0.17403
GO:0022011	myelination in peripheral nervous system	biological_process	11	1	529	2	5749	0.17558
GO:0008068	extracellular-glutamate-gated chloride channel activity	molecular_function	13	1	529	2	5749	0.17558
GO:0048105	establishment of body hair planar orientation	biological_process	8	1	529	2	5749	0.17558
GO:0035902	response to immobilization stress	biological_process	5	1	529	2	5749	0.17558
GO:0005219	ryanodine-sensitive calcium-release channel activity	molecular_function	12	1	529	2	5749	0.17558
GO:0061448	connective tissue development	biological_process	6	1	529	2	5749	0.17558
GO:0060743	epithelial cell maturation involved in prostate gland development	biological_process	9	1	529	2	5749	0.17558
GO:0060741	prostate gland stromal morphogenesis	biological_process	8	1	529	2	5749	0.17558
GO:0099525	presynaptic dense core vesicle exocytosis	NA	NA	1	529	2	5749	0.17558
GO:0090619	meiotic spindle pole	cellular_component	11	1	529	2	5749	0.17558
GO:0032466	negative regulation of cytokinesis	biological_process	9	1	529	2	5749	0.17558
GO:0090220	chromosome localization to nuclear envelope involved in homologous chromosome segregation	biological_process	8	1	529	2	5749	0.17558
GO:1900110	negative regulation of histone H3-K9 dimethylation	biological_process	10	1	529	2	5749	0.17558
GO:1904781	positive regulation of protein localization to centrosome	NA	NA	1	529	2	5749	0.17558
GO:0006563	L-serine metabolic process	biological_process	9	1	529	2	5749	0.17558
GO:0030118	clathrin coat	cellular_component	10	1	529	2	5749	0.17558
GO:0034397	telomere localization	biological_process	7	1	529	2	5749	0.17558
GO:0032049	cardiolipin biosynthetic process	biological_process	9	1	529	2	5749	0.17558
GO:0008260	3-oxoacid CoA-transferase activity	molecular_function	7	1	529	2	5749	0.17558
GO:0009414	response to water deprivation	biological_process	5	1	529	2	5749	0.17558
GO:0060738	epithelial-mesenchymal signaling involved in prostate gland development	biological_process	8	1	529	2	5749	0.17558
GO:0045056	transcytosis	biological_process	5	1	529	2	5749	0.17558
GO:0042137	sequestering of neurotransmitter	biological_process	5	1	529	2	5749	0.17558
GO:0015245	fatty acid transporter activity	molecular_function	6	1	529	2	5749	0.17558
GO:0035880	embryonic nail plate morphogenesis	biological_process	11	1	529	2	5749	0.17558
GO:0003231	cardiac ventricle development	biological_process	10	1	529	2	5749	0.17558
GO:0036038	MKS complex	cellular_component	10	1	529	2	5749	0.17558
GO:0048857	neural nucleus development	biological_process	5	1	529	2	5749	0.17558
GO:0048254	snoRNA localization	biological_process	6	1	529	2	5749	0.17558
GO:0021904	dorsal/ventral neural tube patterning	biological_process	9	1	529	2	5749	0.17558
GO:1902661	positive regulation of glucose mediated signaling pathway	biological_process	12	1	529	2	5749	0.17558
GO:0060528	secretory columnal luminar epithelial cell differentiation involved in prostate glandular acinus development	biological_process	10	1	529	2	5749	0.17558
GO:0015319	sodium:inorganic phosphate symporter activity	molecular_function	11	1	529	2	5749	0.17558
GO:0045218	zonula adherens maintenance	biological_process	8	1	529	2	5749	0.17558
GO:0021570	rhombomere 4 development	biological_process	12	1	529	2	5749	0.17558
GO:0045023	G0 to G1 transition	biological_process	7	1	529	2	5749	0.17558
GO:0048741	skeletal muscle fiber development	biological_process	11	1	529	2	5749	0.17558
GO:0004482	mRNA (guanine-N7-)-methyltransferase activity	molecular_function	8	1	529	2	5749	0.17558
GO:0045728	respiratory burst after phagocytosis	biological_process	6	1	529	2	5749	0.17558
GO:0061144	alveolar secondary septum development	biological_process	11	1	529	2	5749	0.17558
GO:1902683	regulation of receptor localization to synapse	biological_process	8	1	529	2	5749	0.17558
GO:0006929	substrate-dependent cell migration	biological_process	8	1	529	2	5749	0.17558
GO:0048787	presynaptic active zone membrane	cellular_component	9	1	529	2	5749	0.17558
GO:1902691	respiratory basal cell differentiation	biological_process	8	1	529	2	5749	0.17558
GO:0004000	adenosine deaminase activity	molecular_function	7	1	529	2	5749	0.17558
GO:0004977	melanocortin receptor activity	molecular_function	7	1	529	2	5749	0.17558
GO:0000492	box C/D snoRNP assembly	biological_process	10	1	529	2	5749	0.17558
GO:0015321	sodium-dependent phosphate transmembrane transporter activity	molecular_function	10	1	529	2	5749	0.17558
GO:0032229	negative regulation of synaptic transmission, GABAergic	biological_process	11	1	529	2	5749	0.17558
GO:0051586	positive regulation of dopamine uptake involved in synaptic transmission	biological_process	12	1	529	2	5749	0.17558
GO:0070761	pre-snoRNP complex	cellular_component	8	1	529	2	5749	0.17558
GO:1904861	excitatory synapse assembly	NA	NA	1	529	2	5749	0.17558
GO:0002576	platelet degranulation	biological_process	7	1	529	2	5749	0.17558
GO:0021546	rhombomere development	biological_process	11	1	529	2	5749	0.17558
GO:1901838	positive regulation of transcription of nuclear large rRNA transcript from RNA polymerase I promoter	biological_process	14	1	529	2	5749	0.17558
GO:0044341	sodium-dependent phosphate transport	biological_process	9	1	529	2	5749	0.17558
GO:0005845	mRNA cap binding complex	cellular_component	7	1	529	2	5749	0.17558
GO:0097401	synaptic vesicle lumen acidification	biological_process	7	1	529	2	5749	0.17558
GO:0048646	anatomical structure formation involved in morphogenesis	biological_process	5	1	529	2	5749	0.17558
GO:1901799	negative regulation of proteasomal protein catabolic process	biological_process	11	1	529	2	5749	0.17558
GO:0048763	calcium-induced calcium release activity	molecular_function	12	1	529	2	5749	0.17558
GO:0006370	7-methylguanosine mRNA capping	biological_process	11	1	529	2	5749	0.17558
GO:0043063	intercellular bridge organization	biological_process	6	1	529	2	5749	0.17558
GO:0004298	threonine-type endopeptidase activity	molecular_function	8	3	529	16	5749	0.177261
GO:0030878	thyroid gland development	biological_process	8	3	529	16	5749	0.177261
GO:0005839	proteasome core complex	cellular_component	8	3	529	16	5749	0.177261
GO:0032760	positive regulation of tumor necrosis factor production	biological_process	9	3	529	16	5749	0.177261
GO:0043065	positive regulation of apoptotic process	biological_process	9	10	529	79	5749	0.187088
GO:0008333	endosome to lysosome transport	biological_process	8	4	529	25	5749	0.193154
GO:0018107	peptidyl-threonine phosphorylation	biological_process	9	4	529	25	5749	0.193154
GO:0007010	cytoskeleton organization	biological_process	5	7	529	52	5749	0.197777
GO:0007154	cell communication	biological_process	5	2	529	9	5749	0.197862
GO:0031616	spindle pole centrosome	cellular_component	10	2	529	9	5749	0.197862
GO:0043142	single-stranded DNA-dependent ATPase activity	molecular_function	12	2	529	9	5749	0.197862
GO:0005547	phosphatidylinositol-3,4,5-trisphosphate binding	molecular_function	8	2	529	9	5749	0.197862
GO:0052689	carboxylic ester hydrolase activity	molecular_function	6	2	529	9	5749	0.197862
GO:0048147	negative regulation of fibroblast proliferation	biological_process	6	2	529	9	5749	0.197862
GO:0046470	phosphatidylcholine metabolic process	biological_process	9	2	529	9	5749	0.197862
GO:0030971	receptor tyrosine kinase binding	molecular_function	6	2	529	9	5749	0.197862
GO:0072358	cardiovascular system development	biological_process	7	2	529	9	5749	0.197862
GO:0003691	double-stranded telomeric DNA binding	molecular_function	9	2	529	9	5749	0.197862
GO:0005875	microtubule associated complex	cellular_component	11	2	529	9	5749	0.197862
GO:0030574	collagen catabolic process	biological_process	6	2	529	9	5749	0.197862
GO:0046873	metal ion transmembrane transporter activity	molecular_function	9	2	529	9	5749	0.197862
GO:0032502	developmental process	biological_process	3	2	529	9	5749	0.197862
GO:0003222	ventricular trabecula myocardium morphogenesis	biological_process	13	2	529	9	5749	0.197862
GO:0000778	condensed nuclear chromosome kinetochore	cellular_component	14	2	529	9	5749	0.197862
GO:0035115	embryonic forelimb morphogenesis	biological_process	10	2	529	9	5749	0.197862
GO:0051457	maintenance of protein location in nucleus	biological_process	8	2	529	9	5749	0.197862
GO:0034142	toll-like receptor 4 signaling pathway	biological_process	9	2	529	9	5749	0.197862
GO:0004003	ATP-dependent DNA helicase activity	molecular_function	11	2	529	9	5749	0.197862
GO:0030127	COPII vesicle coat	cellular_component	11	2	529	9	5749	0.197862
GO:0032715	negative regulation of interleukin-6 production	biological_process	8	2	529	9	5749	0.197862
GO:0006261	DNA-dependent DNA replication	biological_process	10	2	529	9	5749	0.197862
GO:0001786	phosphatidylserine binding	molecular_function	6	2	529	9	5749	0.197862
GO:0035909	aorta morphogenesis	biological_process	11	2	529	9	5749	0.197862
GO:0030194	positive regulation of blood coagulation	biological_process	8	2	529	9	5749	0.197862
GO:0031629	synaptic vesicle fusion to presynaptic active zone membrane	biological_process	7	2	529	9	5749	0.197862
GO:0004709	MAP kinase kinase kinase activity	molecular_function	10	2	529	9	5749	0.197862
GO:0030879	mammary gland development	biological_process	9	2	529	9	5749	0.197862
GO:0071712	ER-associated misfolded protein catabolic process	biological_process	12	2	529	9	5749	0.197862
GO:0006953	acute-phase response	biological_process	8	2	529	9	5749	0.197862
GO:0005261	cation channel activity	molecular_function	9	2	529	9	5749	0.197862
GO:0005092	GDP-dissociation inhibitor activity	molecular_function	7	2	529	9	5749	0.197862
GO:0003954	NADH dehydrogenase activity	molecular_function	6	2	529	9	5749	0.197862
GO:0021983	pituitary gland development	biological_process	12	2	529	9	5749	0.197862
GO:0048568	embryonic organ development	biological_process	7	2	529	9	5749	0.197862
GO:0048020	CCR chemokine receptor binding	molecular_function	8	2	529	9	5749	0.197862
GO:0009306	protein secretion	biological_process	6	2	529	9	5749	0.197862
GO:0043024	ribosomal small subunit binding	molecular_function	5	2	529	9	5749	0.197862
GO:0004620	phospholipase activity	molecular_function	7	2	529	9	5749	0.197862
GO:0001725	stress fiber	cellular_component	12	2	529	9	5749	0.197862
GO:0032981	mitochondrial respiratory chain complex I assembly	biological_process	7	2	529	9	5749	0.197862
GO:0005921	gap junction	cellular_component	5	2	529	9	5749	0.197862
GO:0030131	clathrin adaptor complex	cellular_component	11	2	529	9	5749	0.197862
GO:0030897	HOPS complex	cellular_component	5	2	529	9	5749	0.197862
GO:0005671	Ada2/Gcn5/Ada3 transcription activator complex	cellular_component	9	2	529	9	5749	0.197862
GO:0042692	muscle cell differentiation	biological_process	7	2	529	9	5749	0.197862
GO:0016236	macroautophagy	biological_process	7	2	529	9	5749	0.197862
GO:0006882	cellular zinc ion homeostasis	biological_process	11	2	529	9	5749	0.197862
GO:0008137	NADH dehydrogenase (ubiquinone) activity	molecular_function	8	3	529	17	5749	0.201477
GO:1905515	non-motile cilium assembly	NA	NA	3	529	17	5749	0.201477
GO:0090263	positive regulation of canonical Wnt signaling pathway	biological_process	11	3	529	17	5749	0.201477
GO:0007389	pattern specification process	biological_process	6	3	529	17	5749	0.201477
GO:0005578	proteinaceous extracellular matrix	cellular_component	5	9	529	71	5749	0.202451
GO:0008270	zinc ion binding	molecular_function	8	47	529	453	5749	0.205422
GO:0042803	protein homodimerization activity	molecular_function	6	27	529	249	5749	0.207692
GO:0005667	transcription factor complex	cellular_component	7	10	529	81	5749	0.208201
GO:0016363	nuclear matrix	cellular_component	11	4	529	26	5749	0.212892
GO:0000149	SNARE binding	molecular_function	5	4	529	26	5749	0.212892
GO:0014069	postsynaptic density	cellular_component	4	4	529	26	5749	0.212892
GO:0016746	transferase activity, transferring acyl groups	molecular_function	5	6	529	44	5749	0.214312
GO:0004843	thiol-dependent ubiquitin-specific protease activity	molecular_function	9	6	529	44	5749	0.214312
GO:0019899	enzyme binding	molecular_function	5	16	529	140	5749	0.214534
GO:0043234	protein complex	cellular_component	4	14	529	121	5749	0.220451
GO:0016324	apical plasma membrane	cellular_component	6	7	529	54	5749	0.224967
GO:0046983	protein dimerization activity	molecular_function	5	9	529	73	5749	0.225754
GO:0001889	liver development	biological_process	8	3	529	18	5749	0.226403
GO:0071407	cellular response to organic cyclic compound	biological_process	7	3	529	18	5749	0.226403
GO:0006904	vesicle docking involved in exocytosis	biological_process	7	3	529	18	5749	0.226403
GO:0042826	histone deacetylase binding	molecular_function	6	6	529	45	5749	0.229618
GO:0016192	vesicle-mediated transport	biological_process	6	8	529	64	5749	0.232437
GO:0016021	integral component of membrane	cellular_component	6	171	529	1773	5749	0.232966
GO:0016409	palmitoyltransferase activity	molecular_function	7	2	529	10	5749	0.233086
GO:0034644	cellular response to UV	biological_process	8	2	529	10	5749	0.233086
GO:0071364	cellular response to epidermal growth factor stimulus	biological_process	8	2	529	10	5749	0.233086
GO:0001954	positive regulation of cell-matrix adhesion	biological_process	7	2	529	10	5749	0.233086
GO:0031491	nucleosome binding	molecular_function	5	2	529	10	5749	0.233086
GO:0070412	R-SMAD binding	molecular_function	6	2	529	10	5749	0.233086
GO:0032516	positive regulation of phosphoprotein phosphatase activity	biological_process	11	2	529	10	5749	0.233086
GO:0035970	peptidyl-threonine dephosphorylation	biological_process	9	2	529	10	5749	0.233086
GO:0051959	dynein light intermediate chain binding	molecular_function	6	2	529	10	5749	0.233086
GO:0051721	protein phosphatase 2A binding	molecular_function	8	2	529	10	5749	0.233086
GO:0001947	heart looping	biological_process	11	2	529	10	5749	0.233086
GO:0030318	melanocyte differentiation	biological_process	10	2	529	10	5749	0.233086
GO:0048661	positive regulation of smooth muscle cell proliferation	biological_process	6	2	529	10	5749	0.233086
GO:0006829	zinc II ion transport	biological_process	9	2	529	10	5749	0.233086
GO:0035098	ESC/E(Z) complex	cellular_component	9	2	529	10	5749	0.233086
GO:0050766	positive regulation of phagocytosis	biological_process	8	2	529	10	5749	0.233086
GO:0036126	sperm flagellum	cellular_component	8	2	529	10	5749	0.233086
GO:0042073	intraciliary transport	biological_process	7	2	529	10	5749	0.233086
GO:0004861	cyclin-dependent protein serine/threonine kinase inhibitor activity	molecular_function	8	2	529	10	5749	0.233086
GO:0006805	xenobiotic metabolic process	biological_process	5	2	529	10	5749	0.233086
GO:0033630	positive regulation of cell adhesion mediated by integrin	biological_process	6	2	529	10	5749	0.233086
GO:0050918	positive chemotaxis	biological_process	6	2	529	10	5749	0.233086
GO:0048487	beta-tubulin binding	molecular_function	7	2	529	10	5749	0.233086
GO:0045739	positive regulation of DNA repair	biological_process	11	2	529	10	5749	0.233086
GO:0000164	protein phosphatase type 1 complex	cellular_component	9	2	529	10	5749	0.233086
GO:0000792	heterochromatin	cellular_component	12	2	529	10	5749	0.233086
GO:0042391	regulation of membrane potential	biological_process	5	2	529	10	5749	0.233086
GO:0006509	membrane protein ectodomain proteolysis	biological_process	8	2	529	10	5749	0.233086
GO:0071310	cellular response to organic substance	biological_process	6	2	529	10	5749	0.233086
GO:0005942	phosphatidylinositol 3-kinase complex	cellular_component	11	2	529	10	5749	0.233086
GO:0048511	rhythmic process	biological_process	3	2	529	10	5749	0.233086
GO:0045727	positive regulation of translation	biological_process	9	4	529	27	5749	0.233158
GO:0072686	mitotic spindle	cellular_component	10	4	529	27	5749	0.233158
GO:0005776	autophagosome	cellular_component	10	4	529	27	5749	0.233158
GO:0098655	cation transmembrane transport	biological_process	7	4	529	27	5749	0.233158
GO:0006816	calcium ion transport	biological_process	9	4	529	27	5749	0.233158
GO:0003924	GTPase activity	molecular_function	9	12	529	103	5749	0.23597
GO:0006974	cellular response to DNA damage stimulus	biological_process	6	12	529	103	5749	0.23597
GO:0001701	in utero embryonic development	biological_process	9	7	529	55	5749	0.239026
GO:0005525	GTP binding	molecular_function	9	20	529	184	5749	0.246857
GO:0007015	actin filament organization	biological_process	7	5	529	37	5749	0.250604
GO:0030424	axon	cellular_component	7	5	529	37	5749	0.250604
GO:2000664	positive regulation of interleukin-5 secretion	biological_process	10	1	529	3	5749	0.251466
GO:0048269	methionine adenosyltransferase complex	cellular_component	7	1	529	3	5749	0.251466
GO:0035239	tube morphogenesis	biological_process	7	1	529	3	5749	0.251466
GO:0006564	L-serine biosynthetic process	biological_process	10	1	529	3	5749	0.251466
GO:0018125	peptidyl-cysteine methylation	biological_process	7	1	529	3	5749	0.251466
GO:0051168	nuclear export	biological_process	9	1	529	3	5749	0.251466
GO:0031045	dense core granule	cellular_component	12	1	529	3	5749	0.251466
GO:0046979	TAP2 binding	molecular_function	6	1	529	3	5749	0.251466
GO:0032803	regulation of low-density lipoprotein particle receptor catabolic process	biological_process	8	1	529	3	5749	0.251466
GO:0010921	regulation of phosphatase activity	biological_process	9	1	529	3	5749	0.251466
GO:0032808	lacrimal gland development	biological_process	8	1	529	3	5749	0.251466
GO:1904263	positive regulation of TORC1 signaling	NA	NA	1	529	3	5749	0.251466
GO:1990666	PCSK9-LDLR complex	NA	NA	1	529	3	5749	0.251466
GO:0030943	mitochondrion targeting sequence binding	molecular_function	7	1	529	3	5749	0.251466
GO:0009087	methionine catabolic process	biological_process	9	1	529	3	5749	0.251466
GO:0097255	R2TP complex	cellular_component	5	1	529	3	5749	0.251466
GO:0097494	regulation of vesicle size	biological_process	6	1	529	3	5749	0.251466
GO:0016638	oxidoreductase activity, acting on the CH-NH2 group of donors	molecular_function	5	1	529	3	5749	0.251466
GO:0005749	mitochondrial respiratory chain complex II, succinate dehydrogenase complex (ubiquinone	cellular_component	15	1	529	3	5749	0.251466
GO:0044300	cerebellar mossy fiber	cellular_component	8	1	529	3	5749	0.251466
GO:0071889	14-3-3 protein binding	molecular_function	5	1	529	3	5749	0.251466
GO:0010989	negative regulation of low-density lipoprotein particle clearance	biological_process	8	1	529	3	5749	0.251466
GO:1901798	positive regulation of signal transduction by p53 class mediator	biological_process	10	1	529	3	5749	0.251466
GO:0032805	positive regulation of low-density lipoprotein particle receptor catabolic process	biological_process	9	1	529	3	5749	0.251466
GO:0007412	axon target recognition	biological_process	6	1	529	3	5749	0.251466
GO:2001031	positive regulation of cellular glucuronidation	biological_process	13	1	529	3	5749	0.251466
GO:0035276	ethanol binding	molecular_function	6	1	529	3	5749	0.251466
GO:0042721	mitochondrial inner membrane protein insertion complex	cellular_component	14	1	529	3	5749	0.251466
GO:0090240	positive regulation of histone H4 acetylation	biological_process	12	1	529	3	5749	0.251466
GO:0043278	response to morphine	biological_process	8	1	529	3	5749	0.251466
GO:2001224	positive regulation of neuron migration	biological_process	10	1	529	3	5749	0.251466
GO:0003839	gamma-glutamylcyclotransferase activity	molecular_function	7	1	529	3	5749	0.251466
GO:1901381	positive regulation of potassium ion transmembrane transport	biological_process	9	1	529	3	5749	0.251466
GO:0060487	lung epithelial cell differentiation	biological_process	8	1	529	3	5749	0.251466
GO:0060218	hematopoietic stem cell differentiation	biological_process	8	1	529	3	5749	0.251466
GO:0044818	mitotic G2/M transition checkpoint	biological_process	11	1	529	3	5749	0.251466
GO:0031588	nucleotide-activated protein kinase complex	cellular_component	7	1	529	3	5749	0.251466
GO:0031639	plasminogen activation	biological_process	9	1	529	3	5749	0.251466
GO:1990667	PCSK9-AnxA2 complex	NA	NA	1	529	3	5749	0.251466
GO:0015677	copper ion import	biological_process	10	1	529	3	5749	0.251466
GO:0034993	LINC complex	cellular_component	13	1	529	3	5749	0.251466
GO:0070201	regulation of establishment of protein localization	biological_process	7	1	529	3	5749	0.251466
GO:0005721	pericentric heterochromatin	cellular_component	13	1	529	3	5749	0.251466
GO:0006273	lagging strand elongation	biological_process	12	1	529	3	5749	0.251466
GO:0042823	pyridoxal phosphate biosynthetic process	biological_process	8	1	529	3	5749	0.251466
GO:0007143	female meiotic division	biological_process	6	1	529	3	5749	0.251466
GO:0061178	regulation of insulin secretion involved in cellular response to glucose stimulus	biological_process	12	1	529	3	5749	0.251466
GO:0014059	regulation of dopamine secretion	biological_process	8	1	529	3	5749	0.251466
GO:0015037	peptide disulfide oxidoreductase activity	molecular_function	7	1	529	3	5749	0.251466
GO:0000246	delta24(24-1) sterol reductase activity	molecular_function	7	1	529	3	5749	0.251466
GO:0036265	RNA (guanine-N7)-methylation	biological_process	12	1	529	3	5749	0.251466
GO:0048270	methionine adenosyltransferase regulator activity	molecular_function	4	1	529	3	5749	0.251466
GO:0071169	establishment of protein localization to chromatin	biological_process	10	1	529	3	5749	0.251466
GO:0045309	protein phosphorylated amino acid binding	molecular_function	6	1	529	3	5749	0.251466
GO:2000650	negative regulation of sodium ion transmembrane transporter activity	biological_process	10	1	529	3	5749	0.251466
GO:0016125	sterol metabolic process	biological_process	7	1	529	3	5749	0.251466
GO:0071313	cellular response to caffeine	biological_process	9	1	529	3	5749	0.251466
GO:0051938	L-glutamate import	biological_process	11	1	529	3	5749	0.251466
GO:0048539	bone marrow development	biological_process	6	1	529	3	5749	0.251466
GO:0098746	fast, calcium ion-dependent exocytosis of neurotransmitter	biological_process	10	1	529	3	5749	0.251466
GO:0097461	ferric iron import into cell	biological_process	12	1	529	3	5749	0.251466
GO:0043139	5'-3' DNA helicase activity	molecular_function	11	1	529	3	5749	0.251466
GO:0050906	detection of stimulus involved in sensory perception	biological_process	8	1	529	3	5749	0.251466
GO:0050806	positive regulation of synaptic transmission	biological_process	9	1	529	3	5749	0.251466
GO:0030547	receptor inhibitor activity	molecular_function	4	1	529	3	5749	0.251466
GO:0032809	neuronal cell body membrane	cellular_component	8	1	529	3	5749	0.251466
GO:0004594	pantothenate kinase activity	molecular_function	7	1	529	3	5749	0.251466
GO:0016772	transferase activity, transferring phosphorus-containing groups	molecular_function	5	1	529	3	5749	0.251466
GO:0051306	mitotic sister chromatid separation	biological_process	9	1	529	3	5749	0.251466
GO:0004478	methionine adenosyltransferase activity	molecular_function	6	1	529	3	5749	0.251466
GO:0045048	protein insertion into ER membrane	biological_process	6	1	529	3	5749	0.251466
GO:0021569	rhombomere 3 development	biological_process	12	1	529	3	5749	0.251466
GO:0045504	dynein heavy chain binding	molecular_function	6	1	529	3	5749	0.251466
GO:0019871	sodium channel inhibitor activity	molecular_function	6	1	529	3	5749	0.251466
GO:0008615	pyridoxine biosynthetic process	biological_process	9	1	529	3	5749	0.251466
GO:1903779	regulation of cardiac conduction	NA	NA	1	529	3	5749	0.251466
GO:0000421	autophagosome membrane	cellular_component	11	1	529	3	5749	0.251466
GO:0032485	regulation of Ral protein signal transduction	biological_process	11	1	529	3	5749	0.251466
GO:0032802	low-density lipoprotein particle receptor catabolic process	biological_process	7	1	529	3	5749	0.251466
GO:0032964	collagen biosynthetic process	biological_process	6	1	529	3	5749	0.251466
GO:1902593	single-organism nuclear import	biological_process	6	1	529	3	5749	0.251466
GO:1905596	negative regulation of low-density lipoprotein particle receptor binding	NA	NA	1	529	3	5749	0.251466
GO:0002337	B-1a B cell differentiation	biological_process	12	1	529	3	5749	0.251466
GO:0045281	succinate dehydrogenase complex	cellular_component	8	1	529	3	5749	0.251466
GO:2000667	positive regulation of interleukin-13 secretion	biological_process	10	1	529	3	5749	0.251466
GO:1905598	negative regulation of low-density lipoprotein receptor activity	NA	NA	1	529	3	5749	0.251466
GO:0052851	ferric-chelate reductase (NADPH) activity	molecular_function	7	1	529	3	5749	0.251466
GO:0004699	calcium-independent protein kinase C activity	molecular_function	10	1	529	3	5749	0.251466
GO:0021612	facial nerve structural organization	biological_process	12	1	529	3	5749	0.251466
GO:0008823	cupric reductase activity	molecular_function	7	1	529	3	5749	0.251466
GO:0043409	negative regulation of MAPK cascade	biological_process	11	1	529	3	5749	0.251466
GO:0035249	synaptic transmission, glutamatergic	biological_process	9	1	529	3	5749	0.251466
GO:0055074	calcium ion homeostasis	biological_process	10	1	529	3	5749	0.251466
GO:0046952	ketone body catabolic process	biological_process	6	1	529	3	5749	0.251466
GO:0008410	CoA-transferase activity	molecular_function	6	1	529	3	5749	0.251466
GO:0032799	low-density lipoprotein receptor particle metabolic process	biological_process	7	1	529	3	5749	0.251466
GO:1905601	negative regulation of receptor-mediated endocytosis involved in cholesterol transport	NA	NA	1	529	3	5749	0.251466
GO:0015278	calcium-release channel activity	molecular_function	10	1	529	3	5749	0.251466
GO:0008321	Ral guanyl-nucleotide exchange factor activity	molecular_function	5	1	529	3	5749	0.251466
GO:0033278	cell proliferation in midbrain	biological_process	11	1	529	3	5749	0.251466
GO:0004733	pyridoxamine-phosphate oxidase activity	molecular_function	7	1	529	3	5749	0.251466
GO:0033148	positive regulation of intracellular estrogen receptor signaling pathway	biological_process	11	1	529	3	5749	0.251466
GO:0030997	regulation of centriole-centriole cohesion	biological_process	10	1	529	3	5749	0.251466
GO:0004679	AMP-activated protein kinase activity	molecular_function	9	1	529	3	5749	0.251466
GO:0060965	negative regulation of gene silencing by miRNA	biological_process	13	1	529	3	5749	0.251466
GO:0010729	positive regulation of hydrogen peroxide biosynthetic process	biological_process	8	1	529	3	5749	0.251466
GO:0006099	tricarboxylic acid cycle	biological_process	10	3	529	19	5749	0.251872
GO:0000980	RNA polymerase II distal enhancer sequence-specific DNA binding	molecular_function	11	3	529	19	5749	0.251872
GO:0045335	phagocytic vesicle	cellular_component	12	3	529	19	5749	0.251872
GO:0007224	smoothened signaling pathway	biological_process	8	3	529	19	5749	0.251872
GO:0000226	microtubule cytoskeleton organization	biological_process	6	4	529	28	5749	0.253865
GO:0030336	negative regulation of cell migration	biological_process	9	4	529	28	5749	0.253865
GO:0008033	tRNA processing	biological_process	11	4	529	28	5749	0.253865
GO:0071944	cell periphery	cellular_component	5	4	529	28	5749	0.253865
GO:0005743	mitochondrial inner membrane	cellular_component	13	15	529	135	5749	0.257889
GO:0001078	transcriptional repressor activity, RNA polymerase II core promoter proximal region sequence-specific binding	molecular_function	7	6	529	47	5749	0.261199
GO:0006351	transcription, DNA-templated	biological_process	10	21	529	196	5749	0.261294
GO:0015629	actin cytoskeleton	cellular_component	10	7	529	57	5749	0.267943
GO:0008654	phospholipid biosynthetic process	biological_process	6	2	529	11	5749	0.26863
GO:0048038	quinone binding	molecular_function	5	2	529	11	5749	0.26863
GO:0005057	signal transducer activity, downstream of receptor	molecular_function	5	2	529	11	5749	0.26863
GO:0002548	monocyte chemotaxis	biological_process	6	2	529	11	5749	0.26863
GO:0046326	positive regulation of glucose import	biological_process	11	2	529	11	5749	0.26863
GO:0070530	K63-linked polyubiquitin binding	molecular_function	8	2	529	11	5749	0.26863
GO:0018279	protein N-linked glycosylation via asparagine	biological_process	10	2	529	11	5749	0.26863
GO:0031418	L-ascorbic acid binding	molecular_function	6	2	529	11	5749	0.26863
GO:0034364	high-density lipoprotein particle	cellular_component	7	2	529	11	5749	0.26863
GO:0045668	negative regulation of osteoblast differentiation	biological_process	9	2	529	11	5749	0.26863
GO:0050840	extracellular matrix binding	molecular_function	4	2	529	11	5749	0.26863
GO:0050750	low-density lipoprotein particle receptor binding	molecular_function	7	2	529	11	5749	0.26863
GO:0001105	RNA polymerase II transcription coactivator activity	molecular_function	7	2	529	11	5749	0.26863
GO:0030001	metal ion transport	biological_process	7	2	529	11	5749	0.26863
GO:0030672	synaptic vesicle membrane	cellular_component	12	2	529	11	5749	0.26863
GO:1901215	negative regulation of neuron death	biological_process	8	2	529	11	5749	0.26863
GO:0042326	negative regulation of phosphorylation	biological_process	9	2	529	11	5749	0.26863
GO:0030515	snoRNA binding	molecular_function	7	2	529	11	5749	0.26863
GO:0042104	positive regulation of activated T cell proliferation	biological_process	9	2	529	11	5749	0.26863
GO:0048247	lymphocyte chemotaxis	biological_process	6	2	529	11	5749	0.26863
GO:0030864	cortical actin cytoskeleton	cellular_component	12	2	529	11	5749	0.26863
GO:0030686	90S preribosome	cellular_component	9	2	529	11	5749	0.26863
GO:0032743	positive regulation of interleukin-2 production	biological_process	8	2	529	11	5749	0.26863
GO:0042056	chemoattractant activity	molecular_function	3	2	529	11	5749	0.26863
GO:0007219	Notch signaling pathway	biological_process	8	5	529	38	5749	0.268664
GO:0004197	cysteine-type endopeptidase activity	molecular_function	8	5	529	38	5749	0.268664
GO:0051301	cell division	biological_process	5	5	529	38	5749	0.268664
GO:0007605	sensory perception of sound	biological_process	9	4	529	29	5749	0.274929
GO:0030018	Z disc	cellular_component	13	4	529	29	5749	0.274929
GO:0005747	mitochondrial respiratory chain complex I	cellular_component	15	4	529	29	5749	0.274929
GO:0043231	intracellular membrane-bounded organelle	cellular_component	8	25	529	239	5749	0.276802
GO:0003714	transcription corepressor activity	molecular_function	6	6	529	48	5749	0.2774
GO:0005262	calcium channel activity	molecular_function	10	3	529	20	5749	0.277724
GO:0000278	mitotic cell cycle	biological_process	6	3	529	20	5749	0.277724
GO:0017048	Rho GTPase binding	molecular_function	9	3	529	20	5749	0.277724
GO:0004721	phosphoprotein phosphatase activity	molecular_function	8	7	529	58	5749	0.282746
GO:0001934	positive regulation of protein phosphorylation	biological_process	10	5	529	39	5749	0.286996
GO:0005975	carbohydrate metabolic process	biological_process	5	9	529	78	5749	0.287889
GO:0007399	nervous system development	biological_process	7	6	529	49	5749	0.293826
GO:0005829	cytosol	cellular_component	9	105	529	1086	5749	0.294672
GO:0016491	oxidoreductase activity	molecular_function	4	20	529	191	5749	0.303465
GO:0008138	protein tyrosine/serine/threonine phosphatase activity	molecular_function	9	3	529	21	5749	0.303811
GO:0005623	cell	cellular_component	3	3	529	21	5749	0.303811
GO:0060079	excitatory postsynaptic potential	biological_process	9	3	529	21	5749	0.303811
GO:0031490	chromatin DNA binding	molecular_function	5	3	529	21	5749	0.303811
GO:0030433	ER-associated ubiquitin-dependent protein catabolic process	biological_process	11	3	529	21	5749	0.303811
GO:0046835	carbohydrate phosphorylation	biological_process	8	2	529	12	5749	0.304138
GO:0032481	positive regulation of type I interferon production	biological_process	8	2	529	12	5749	0.304138
GO:0005528	FK506 binding	molecular_function	6	2	529	12	5749	0.304138
GO:0071479	cellular response to ionizing radiation	biological_process	7	2	529	12	5749	0.304138
GO:0009617	response to bacterium	biological_process	7	2	529	12	5749	0.304138
GO:0015269	calcium-activated potassium channel activity	molecular_function	10	2	529	12	5749	0.304138
GO:0016773	phosphotransferase activity, alcohol group as acceptor	molecular_function	6	2	529	12	5749	0.304138
GO:0048662	negative regulation of smooth muscle cell proliferation	biological_process	6	2	529	12	5749	0.304138
GO:1903146	regulation of mitophagy	biological_process	8	2	529	12	5749	0.304138
GO:0042542	response to hydrogen peroxide	biological_process	7	2	529	12	5749	0.304138
GO:0003374	dynamin family protein polymerization involved in mitochondrial fission	biological_process	7	2	529	12	5749	0.304138
GO:0004519	endonuclease activity	molecular_function	7	2	529	12	5749	0.304138
GO:0005104	fibroblast growth factor receptor binding	molecular_function	7	2	529	12	5749	0.304138
GO:0044319	wound healing, spreading of cells	biological_process	8	2	529	12	5749	0.304138
GO:0007064	mitotic sister chromatid cohesion	biological_process	9	2	529	12	5749	0.304138
GO:0045737	positive regulation of cyclin-dependent protein serine/threonine kinase activity	biological_process	13	2	529	12	5749	0.304138
GO:0006493	protein O-linked glycosylation	biological_process	9	2	529	12	5749	0.304138
GO:0005697	telomerase holoenzyme complex	cellular_component	8	2	529	12	5749	0.304138
GO:0043488	regulation of mRNA stability	biological_process	10	2	529	12	5749	0.304138
GO:0001974	blood vessel remodeling	biological_process	6	2	529	12	5749	0.304138
GO:0046007	negative regulation of activated T cell proliferation	biological_process	10	2	529	12	5749	0.304138
GO:0048015	phosphatidylinositol-mediated signaling	biological_process	9	2	529	12	5749	0.304138
GO:0055072	iron ion homeostasis	biological_process	11	2	529	12	5749	0.304138
GO:0090200	positive regulation of release of cytochrome c from mitochondria	biological_process	9	2	529	12	5749	0.304138
GO:0005201	extracellular matrix structural constituent	molecular_function	4	2	529	12	5749	0.304138
GO:0031492	nucleosomal DNA binding	molecular_function	6	2	529	12	5749	0.304138
GO:0051082	unfolded protein binding	molecular_function	5	6	529	50	5749	0.310439
GO:0048471	perinuclear region of cytoplasm	cellular_component	9	17	529	161	5749	0.310759
GO:0006629	lipid metabolic process	biological_process	5	7	529	60	5749	0.312905
GO:0046777	protein autophosphorylation	biological_process	9	7	529	60	5749	0.312905
GO:0005524	ATP binding	molecular_function	9	67	529	686	5749	0.313299
GO:0031965	nuclear membrane	cellular_component	12	8	529	70	5749	0.313901
GO:0055114	oxidation-reduction process	biological_process	5	31	529	307	5749	0.316966
GO:0001501	skeletal system development	biological_process	7	4	529	31	5749	0.317799
GO:0019003	GDP binding	molecular_function	9	4	529	31	5749	0.317799
GO:0000902	cell morphogenesis	biological_process	7	4	529	31	5749	0.317799
GO:1903955	positive regulation of protein targeting to mitochondrion	NA	NA	4	529	31	5749	0.317799
GO:0002943	tRNA dihydrouridine synthesis	biological_process	13	1	529	4	5749	0.320379
GO:0051233	spindle midzone	cellular_component	10	1	529	4	5749	0.320379
GO:0019933	cAMP-mediated signaling	biological_process	10	1	529	4	5749	0.320379
GO:0004719	protein-L-isoaspartate (D-aspartate) O-methyltransferase activity	molecular_function	10	1	529	4	5749	0.320379
GO:0017150	tRNA dihydrouridine synthase activity	molecular_function	6	1	529	4	5749	0.320379
GO:0035372	protein localization to microtubule	biological_process	10	1	529	4	5749	0.320379
GO:2001222	regulation of neuron migration	biological_process	9	1	529	4	5749	0.320379
GO:0010469	regulation of receptor activity	biological_process	8	1	529	4	5749	0.320379
GO:0000104	succinate dehydrogenase activity	molecular_function	6	1	529	4	5749	0.320379
GO:0005771	multivesicular body	cellular_component	11	1	529	4	5749	0.320379
GO:0051011	microtubule minus-end binding	molecular_function	8	1	529	4	5749	0.320379
GO:0016628	oxidoreductase activity, acting on the CH-CH group of donors, NAD or NADP as acceptor	molecular_function	6	1	529	4	5749	0.320379
GO:0045475	locomotor rhythm	biological_process	6	1	529	4	5749	0.320379
GO:0022614	membrane to membrane docking	biological_process	6	1	529	4	5749	0.320379
GO:0030546	receptor activator activity	molecular_function	4	1	529	4	5749	0.320379
GO:0071157	negative regulation of cell cycle arrest	biological_process	9	1	529	4	5749	0.320379
GO:0006278	RNA-dependent DNA biosynthetic process	biological_process	10	1	529	4	5749	0.320379
GO:0045956	positive regulation of calcium ion-dependent exocytosis	biological_process	9	1	529	4	5749	0.320379
GO:0060740	prostate gland epithelium morphogenesis	biological_process	8	1	529	4	5749	0.320379
GO:0007398	ectoderm development	biological_process	6	1	529	4	5749	0.320379
GO:0009991	response to extracellular stimulus	biological_process	5	1	529	4	5749	0.320379
GO:0035567	non-canonical Wnt signaling pathway	biological_process	9	1	529	4	5749	0.320379
GO:0030330	DNA damage response, signal transduction by p53 class mediator	biological_process	9	1	529	4	5749	0.320379
GO:0034190	apolipoprotein receptor binding	molecular_function	6	1	529	4	5749	0.320379
GO:0004647	phosphoserine phosphatase activity	molecular_function	8	1	529	4	5749	0.320379
GO:2001268	negative regulation of cysteine-type endopeptidase activity involved in apoptotic signaling pathway	biological_process	14	1	529	4	5749	0.320379
GO:0071065	alpha9-beta1 integrin-vascular cell adhesion molecule-1 complex	cellular_component	7	1	529	4	5749	0.320379
GO:0005915	zonula adherens	cellular_component	6	1	529	4	5749	0.320379
GO:0006264	mitochondrial DNA replication	biological_process	11	1	529	4	5749	0.320379
GO:0034214	protein hexamerization	biological_process	9	1	529	4	5749	0.320379
GO:2000619	negative regulation of histone H4-K16 acetylation	biological_process	13	1	529	4	5749	0.320379
GO:0016888	endodeoxyribonuclease activity, producing 5'-phosphomonoesters	molecular_function	9	1	529	4	5749	0.320379
GO:0090179	planar cell polarity pathway involved in neural tube closure	biological_process	11	1	529	4	5749	0.320379
GO:0090197	positive regulation of chemokine secretion	biological_process	10	1	529	4	5749	0.320379
GO:0071361	cellular response to ethanol	biological_process	8	1	529	4	5749	0.320379
GO:0006624	vacuolar protein processing	biological_process	7	1	529	4	5749	0.320379
GO:0060292	long term synaptic depression	biological_process	10	1	529	4	5749	0.320379
GO:0051026	chiasma assembly	biological_process	8	1	529	4	5749	0.320379
GO:0006646	phosphatidylethanolamine biosynthetic process	biological_process	8	1	529	4	5749	0.320379
GO:1900113	negative regulation of histone H3-K9 trimethylation	biological_process	10	1	529	4	5749	0.320379
GO:0045039	protein import into mitochondrial inner membrane	biological_process	8	1	529	4	5749	0.320379
GO:0009612	response to mechanical stimulus	biological_process	5	1	529	4	5749	0.320379
GO:0061029	eyelid development in camera-type eye	biological_process	11	1	529	4	5749	0.320379
GO:0030008	TRAPP complex	cellular_component	7	1	529	4	5749	0.320379
GO:0009308	amine metabolic process	biological_process	6	1	529	4	5749	0.320379
GO:0016188	synaptic vesicle maturation	biological_process	6	1	529	4	5749	0.320379
GO:0008131	primary amine oxidase activity	molecular_function	7	1	529	4	5749	0.320379
GO:0030368	interleukin-17 receptor activity	molecular_function	7	1	529	4	5749	0.320379
GO:2000738	positive regulation of stem cell differentiation	biological_process	9	1	529	4	5749	0.320379
GO:0070326	very-low-density lipoprotein particle receptor binding	molecular_function	7	1	529	4	5749	0.320379
GO:0031091	platelet alpha granule	cellular_component	12	1	529	4	5749	0.320379
GO:0051920	peroxiredoxin activity	molecular_function	6	1	529	4	5749	0.320379
GO:0090136	epithelial cell-cell adhesion	biological_process	7	1	529	4	5749	0.320379
GO:0030742	GTP-dependent protein binding	molecular_function	5	1	529	4	5749	0.320379
GO:0045892	negative regulation of transcription, DNA-templated	biological_process	12	19	529	183	5749	0.323312
GO:0043433	negative regulation of sequence-specific DNA binding transcription factor activity	biological_process	13	3	529	22	5749	0.329996
GO:0000976	transcription regulatory region sequence-specific DNA binding	molecular_function	9	3	529	22	5749	0.329996
GO:0003755	peptidyl-prolyl cis-trans isomerase activity	molecular_function	6	3	529	22	5749	0.329996
GO:0006812	cation transport	biological_process	6	3	529	22	5749	0.329996
GO:0000413	protein peptidyl-prolyl isomerization	biological_process	10	3	529	22	5749	0.329996
GO:0007178	transmembrane receptor protein serine/threonine kinase signaling pathway	biological_process	9	2	529	13	5749	0.339315
GO:0030326	embryonic limb morphogenesis	biological_process	9	2	529	13	5749	0.339315
GO:0015631	tubulin binding	molecular_function	6	2	529	13	5749	0.339315
GO:0043029	T cell homeostasis	biological_process	6	2	529	13	5749	0.339315
GO:0006400	tRNA modification	biological_process	12	2	529	13	5749	0.339315
GO:0030705	cytoskeleton-dependent intracellular transport	biological_process	6	2	529	13	5749	0.339315
GO:0005912	adherens junction	cellular_component	5	2	529	13	5749	0.339315
GO:0051898	negative regulation of protein kinase B signaling	biological_process	10	2	529	13	5749	0.339315
GO:0032007	negative regulation of TOR signaling	biological_process	10	2	529	13	5749	0.339315
GO:0005244	voltage-gated ion channel activity	molecular_function	9	2	529	13	5749	0.339315
GO:0001503	ossification	biological_process	5	2	529	13	5749	0.339315
GO:0000281	mitotic cytokinesis	biological_process	7	2	529	13	5749	0.339315
GO:0019843	rRNA binding	molecular_function	7	2	529	13	5749	0.339315
GO:0045930	negative regulation of mitotic cell cycle	biological_process	8	2	529	13	5749	0.339315
GO:0097194	execution phase of apoptosis	biological_process	8	2	529	13	5749	0.339315
GO:0032543	mitochondrial translation	biological_process	8	2	529	13	5749	0.339315
GO:0008408	3'-5' exonuclease activity	molecular_function	8	2	529	13	5749	0.339315
GO:0010906	regulation of glucose metabolic process	biological_process	7	2	529	13	5749	0.339315
GO:0031072	heat shock protein binding	molecular_function	5	2	529	13	5749	0.339315
GO:0006913	nucleocytoplasmic transport	biological_process	8	2	529	13	5749	0.339315
GO:0048146	positive regulation of fibroblast proliferation	biological_process	6	2	529	13	5749	0.339315
GO:0001702	gastrulation with mouth forming second	biological_process	9	2	529	13	5749	0.339315
GO:0061028	establishment of endothelial barrier	biological_process	10	2	529	13	5749	0.339315
GO:0045454	cell redox homeostasis	biological_process	6	4	529	32	5749	0.33945
GO:0008013	beta-catenin binding	molecular_function	5	4	529	32	5749	0.33945
GO:0071356	cellular response to tumor necrosis factor	biological_process	8	4	529	32	5749	0.33945
GO:0010629	negative regulation of gene expression	biological_process	8	6	529	52	5749	0.344087
GO:0007420	brain development	biological_process	9	6	529	52	5749	0.344087
GO:0003700	transcription factor activity, sequence-specific DNA binding	molecular_function	4	38	529	385	5749	0.345743
GO:0005783	endoplasmic reticulum	cellular_component	9	33	529	333	5749	0.350749
GO:0006468	protein phosphorylation	biological_process	8	34	529	344	5749	0.353753
GO:1902600	hydrogen ion transmembrane transport	biological_process	9	3	529	23	5749	0.356154
GO:0005515	protein binding	molecular_function	4	3	529	23	5749	0.356154
GO:0016787	hydrolase activity	molecular_function	4	33	529	334	5749	0.357513
GO:0036064	ciliary basal body	cellular_component	12	5	529	43	5749	0.362025
GO:0034260	negative regulation of GTPase activity	biological_process	15	2	529	14	5749	0.373923
GO:0060716	labyrinthine layer blood vessel development	biological_process	7	2	529	14	5749	0.373923
GO:0030513	positive regulation of BMP signaling pathway	biological_process	15	2	529	14	5749	0.373923
GO:0010033	response to organic substance	biological_process	5	2	529	14	5749	0.373923
GO:0042273	ribosomal large subunit biogenesis	biological_process	7	2	529	14	5749	0.373923
GO:0021915	neural tube development	biological_process	9	2	529	14	5749	0.373923
GO:0055038	recycling endosome membrane	cellular_component	11	2	529	14	5749	0.373923
GO:0007080	mitotic metaphase plate congression	biological_process	9	2	529	14	5749	0.373923
GO:0030904	retromer complex	cellular_component	6	2	529	14	5749	0.373923
GO:0030155	regulation of cell adhesion	biological_process	5	2	529	14	5749	0.373923
GO:0006094	gluconeogenesis	biological_process	9	2	529	14	5749	0.373923
GO:0071339	MLL1 complex	cellular_component	10	2	529	14	5749	0.373923
GO:0034446	substrate adhesion-dependent cell spreading	biological_process	9	2	529	14	5749	0.373923
GO:0051017	actin filament bundle assembly	biological_process	9	2	529	14	5749	0.373923
GO:0010595	positive regulation of endothelial cell migration	biological_process	12	2	529	14	5749	0.373923
GO:0038083	peptidyl-tyrosine autophosphorylation	biological_process	10	2	529	14	5749	0.373923
GO:0048705	skeletal system morphogenesis	biological_process	8	2	529	14	5749	0.373923
GO:0098793	presynapse	NA	NA	2	529	14	5749	0.373923
GO:0051209	release of sequestered calcium ion into cytosol	biological_process	14	2	529	14	5749	0.373923
GO:0045665	negative regulation of neuron differentiation	biological_process	11	2	529	14	5749	0.373923
GO:0007596	blood coagulation	biological_process	6	2	529	14	5749	0.373923
GO:0006879	cellular iron ion homeostasis	biological_process	11	2	529	14	5749	0.373923
GO:0005575	cellular_component	cellular_component	2	2	529	14	5749	0.373923
GO:0004364	glutathione transferase activity	molecular_function	6	2	529	14	5749	0.373923
GO:0031410	cytoplasmic vesicle	cellular_component	9	7	529	64	5749	0.374677
GO:0003723	RNA binding	molecular_function	6	56	529	582	5749	0.37852
GO:0009952	anterior/posterior pattern specification	biological_process	8	5	529	44	5749	0.380963
GO:0000784	nuclear chromosome, telomeric region	cellular_component	13	5	529	44	5749	0.380963
GO:0008360	regulation of cell shape	biological_process	9	5	529	44	5749	0.380963
GO:0009615	response to virus	biological_process	7	4	529	34	5749	0.38282
GO:0070131	positive regulation of mitochondrial translation	biological_process	10	1	529	5	5749	0.382958
GO:0060347	heart trabecula formation	biological_process	11	1	529	5	5749	0.382958
GO:0014808	release of sequestered calcium ion into cytosol by sarcoplasmic reticulum	biological_process	15	1	529	5	5749	0.382958
GO:0015386	potassium:proton antiporter activity	molecular_function	11	1	529	5	5749	0.382958
GO:0004536	deoxyribonuclease activity	molecular_function	7	1	529	5	5749	0.382958
GO:0015385	sodium:proton antiporter activity	molecular_function	11	1	529	5	5749	0.382958
GO:0042613	MHC class II protein complex	cellular_component	8	1	529	5	5749	0.382958
GO:0000301	retrograde transport, vesicle recycling within Golgi	biological_process	8	1	529	5	5749	0.382958
GO:0002504	antigen processing and presentation of peptide or polysaccharide antigen via MHC class II	biological_process	5	1	529	5	5749	0.382958
GO:0034080	CENP-A containing nucleosome assembly	biological_process	14	1	529	5	5749	0.382958
GO:0005522	profilin binding	molecular_function	5	1	529	5	5749	0.382958
GO:0042753	positive regulation of circadian rhythm	biological_process	6	1	529	5	5749	0.382958
GO:0072487	MSL complex	cellular_component	9	1	529	5	5749	0.382958
GO:0010763	positive regulation of fibroblast migration	biological_process	11	1	529	5	5749	0.382958
GO:0021615	glossopharyngeal nerve morphogenesis	biological_process	11	1	529	5	5749	0.382958
GO:0007029	endoplasmic reticulum organization	biological_process	5	1	529	5	5749	0.382958
GO:0001920	negative regulation of receptor recycling	biological_process	9	1	529	5	5749	0.382958
GO:2000778	positive regulation of interleukin-6 secretion	biological_process	9	1	529	5	5749	0.382958
GO:0004559	alpha-mannosidase activity	molecular_function	8	1	529	5	5749	0.382958
GO:0050848	regulation of calcium-mediated signaling	biological_process	10	1	529	5	5749	0.382958
GO:0033555	multicellular organismal response to stress	biological_process	5	1	529	5	5749	0.382958
GO:0001940	male pronucleus	cellular_component	11	1	529	5	5749	0.382958
GO:0090316	positive regulation of intracellular protein transport	biological_process	8	1	529	5	5749	0.382958
GO:0051569	regulation of histone H3-K4 methylation	biological_process	10	1	529	5	5749	0.382958
GO:0001206	transcriptional repressor activity, RNA polymerase II distal enhancer sequence-specific binding	molecular_function	7	1	529	5	5749	0.382958
GO:0006013	mannose metabolic process	biological_process	9	1	529	5	5749	0.382958
GO:0031080	nuclear pore outer ring	cellular_component	13	1	529	5	5749	0.382958
GO:0060071	Wnt signaling pathway, planar cell polarity pathway	biological_process	10	1	529	5	5749	0.382958
GO:0060441	epithelial tube branching involved in lung morphogenesis	biological_process	8	1	529	5	5749	0.382958
GO:0017158	regulation of calcium ion-dependent exocytosis	biological_process	8	1	529	5	5749	0.382958
GO:0090267	positive regulation of mitotic cell cycle spindle assembly checkpoint	biological_process	17	1	529	5	5749	0.382958
GO:0033365	protein localization to organelle	biological_process	7	1	529	5	5749	0.382958
GO:0015923	mannosidase activity	molecular_function	7	1	529	5	5749	0.382958
GO:0035669	TRAM-dependent toll-like receptor 4 signaling pathway	biological_process	11	1	529	5	5749	0.382958
GO:0098719	sodium ion import across plasma membrane	biological_process	10	1	529	5	5749	0.382958
GO:0005049	nuclear export signal receptor activity	molecular_function	6	1	529	5	5749	0.382958
GO:0002281	macrophage activation involved in immune response	biological_process	8	1	529	5	5749	0.382958
GO:0030314	junctional membrane complex	cellular_component	9	1	529	5	5749	0.382958
GO:0035869	ciliary transition zone	cellular_component	9	1	529	5	5749	0.382958
GO:0002092	positive regulation of receptor internalization	biological_process	9	1	529	5	5749	0.382958
GO:0051223	regulation of protein transport	biological_process	7	1	529	5	5749	0.382958
GO:0042594	response to starvation	biological_process	5	1	529	5	5749	0.382958
GO:0050684	regulation of mRNA processing	biological_process	11	1	529	5	5749	0.382958
GO:0004704	NF-kappaB-inducing kinase activity	molecular_function	10	1	529	5	5749	0.382958
GO:0070257	positive regulation of mucus secretion	biological_process	8	1	529	5	5749	0.382958
GO:0038061	NIK/NF-kappaB signaling	biological_process	8	1	529	5	5749	0.382958
GO:0043523	regulation of neuron apoptotic process	biological_process	10	1	529	5	5749	0.382958
GO:0005790	smooth endoplasmic reticulum	cellular_component	10	1	529	5	5749	0.382958
GO:0008233	peptidase activity	molecular_function	5	13	529	127	5749	0.385769
GO:0003774	motor activity	molecular_function	9	5	529	45	5749	0.399881
GO:0005739	mitochondrion	cellular_component	9	61	529	640	5749	0.402082
GO:0031966	mitochondrial membrane	cellular_component	12	4	529	35	5749	0.404408
GO:0001228	transcriptional activator activity, RNA polymerase II transcription regulatory region sequence-specific binding	molecular_function	6	4	529	35	5749	0.404408
GO:0031463	Cul3-RING ubiquitin ligase complex	cellular_component	9	4	529	35	5749	0.404408
GO:0005200	structural constituent of cytoskeleton	molecular_function	4	4	529	35	5749	0.404408
GO:0043123	positive regulation of I-kappaB kinase/NF-kappaB signaling	biological_process	10	7	529	66	5749	0.405867
GO:0004402	histone acetyltransferase activity	molecular_function	10	2	529	15	5749	0.407768
GO:0000723	telomere maintenance	biological_process	9	2	529	15	5749	0.407768
GO:0045596	negative regulation of cell differentiation	biological_process	8	2	529	15	5749	0.407768
GO:0043966	histone H3 acetylation	biological_process	10	2	529	15	5749	0.407768
GO:0001654	eye development	biological_process	9	2	529	15	5749	0.407768
GO:0009411	response to UV	biological_process	7	2	529	15	5749	0.407768
GO:0045171	intercellular bridge	cellular_component	5	2	529	15	5749	0.407768
GO:0031902	late endosome membrane	cellular_component	11	2	529	15	5749	0.407768
GO:0048706	embryonic skeletal system development	biological_process	9	2	529	15	5749	0.407768
GO:0072593	reactive oxygen species metabolic process	biological_process	5	2	529	15	5749	0.407768
GO:0008543	fibroblast growth factor receptor signaling pathway	biological_process	10	2	529	15	5749	0.407768
GO:0030141	secretory granule	cellular_component	11	2	529	15	5749	0.407768
GO:0005385	zinc ion transmembrane transporter activity	molecular_function	11	2	529	15	5749	0.407768
GO:2001237	negative regulation of extrinsic apoptotic signaling pathway	biological_process	10	2	529	15	5749	0.407768
GO:0005930	axoneme	cellular_component	9	2	529	15	5749	0.407768
GO:0010923	negative regulation of phosphatase activity	biological_process	10	2	529	15	5749	0.407768
GO:0043473	pigmentation	biological_process	4	2	529	15	5749	0.407768
GO:0043015	gamma-tubulin binding	molecular_function	7	2	529	15	5749	0.407768
GO:0007519	skeletal muscle tissue development	biological_process	10	2	529	15	5749	0.407768
GO:0010466	negative regulation of peptidase activity	biological_process	10	2	529	15	5749	0.407768
GO:0000793	condensed chromosome	cellular_component	10	2	529	15	5749	0.407768
GO:0008625	extrinsic apoptotic signaling pathway via death domain receptors	biological_process	9	2	529	15	5749	0.407768
GO:0000266	mitochondrial fission	biological_process	6	2	529	15	5749	0.407768
GO:0009749	response to glucose	biological_process	9	2	529	15	5749	0.407768
GO:0000045	autophagosome assembly	biological_process	8	2	529	15	5749	0.407768
GO:0008630	intrinsic apoptotic signaling pathway in response to DNA damage	biological_process	9	2	529	15	5749	0.407768
GO:0030017	sarcomere	cellular_component	11	2	529	15	5749	0.407768
GO:0015030	Cajal body	cellular_component	14	3	529	25	5749	0.407947
GO:0007030	Golgi organization	biological_process	5	3	529	25	5749	0.407947
GO:0051536	iron-sulfur cluster binding	molecular_function	5	3	529	25	5749	0.407947
GO:0016798	hydrolase activity, acting on glycosyl bonds	molecular_function	5	3	529	25	5749	0.407947
GO:0009791	post-embryonic development	biological_process	6	3	529	25	5749	0.407947
GO:0009887	animal organ morphogenesis	biological_process	8	3	529	25	5749	0.407947
GO:0000977	RNA polymerase II regulatory region sequence-specific DNA binding	molecular_function	10	8	529	77	5749	0.414488
GO:0005085	guanyl-nucleotide exchange factor activity	molecular_function	3	5	529	46	5749	0.418737
GO:0000398	mRNA splicing, via spliceosome	biological_process	11	5	529	46	5749	0.418737
GO:0043547	positive regulation of GTPase activity	biological_process	15	18	529	183	5749	0.419207
GO:0007267	cell-cell signaling	biological_process	6	4	529	36	5749	0.42585
GO:0007049	cell cycle	biological_process	5	6	529	57	5749	0.429051
GO:0045296	cadherin binding	molecular_function	6	11	529	110	5749	0.432881
GO:0048704	embryonic skeletal system morphogenesis	biological_process	10	3	529	26	5749	0.433389
GO:0030182	neuron differentiation	biological_process	9	3	529	26	5749	0.433389
GO:0003735	structural constituent of ribosome	molecular_function	4	12	529	121	5749	0.437469
GO:0005929	cilium	cellular_component	6	5	529	47	5749	0.437492
GO:0097225	sperm midpiece	cellular_component	9	1	529	6	5749	0.439786
GO:0004602	glutathione peroxidase activity	molecular_function	7	1	529	6	5749	0.439786
GO:0007413	axonal fasciculation	biological_process	7	1	529	6	5749	0.439786
GO:0031334	positive regulation of protein complex assembly	biological_process	7	1	529	6	5749	0.439786
GO:1901030	positive regulation of mitochondrial outer membrane permeabilization involved in apoptotic signaling pathway	biological_process	12	1	529	6	5749	0.439786
GO:1901981	phosphatidylinositol phosphate binding	molecular_function	7	1	529	6	5749	0.439786
GO:0031435	mitogen-activated protein kinase kinase kinase binding	molecular_function	8	1	529	6	5749	0.439786
GO:0071569	protein ufmylation	biological_process	10	1	529	6	5749	0.439786
GO:0001944	vasculature development	biological_process	7	1	529	6	5749	0.439786
GO:0019773	proteasome core complex, alpha-subunit complex	cellular_component	9	1	529	6	5749	0.439786
GO:1990226	histone methyltransferase binding	molecular_function	6	1	529	6	5749	0.439786
GO:0010742	macrophage derived foam cell differentiation	biological_process	8	1	529	6	5749	0.439786
GO:0016614	oxidoreductase activity, acting on CH-OH group of donors	molecular_function	5	1	529	6	5749	0.439786
GO:0032794	GTPase activating protein binding	molecular_function	5	1	529	6	5749	0.439786
GO:0008266	poly(U) RNA binding	molecular_function	9	1	529	6	5749	0.439786
GO:0051279	regulation of release of sequestered calcium ion into cytosol	biological_process	15	1	529	6	5749	0.439786
GO:0007088	regulation of mitotic nuclear division	biological_process	8	1	529	6	5749	0.439786
GO:0050901	leukocyte tethering or rolling	biological_process	6	1	529	6	5749	0.439786
GO:0005791	rough endoplasmic reticulum	cellular_component	10	1	529	6	5749	0.439786
GO:0008574	ATP-dependent microtubule motor activity, plus-end-directed	molecular_function	11	1	529	6	5749	0.439786
GO:0007611	learning or memory	biological_process	5	1	529	6	5749	0.439786
GO:0048103	somatic stem cell division	biological_process	7	1	529	6	5749	0.439786
GO:0048665	neuron fate specification	biological_process	7	1	529	6	5749	0.439786
GO:0030315	T-tubule	cellular_component	7	1	529	6	5749	0.439786
GO:0030169	low-density lipoprotein particle binding	molecular_function	7	1	529	6	5749	0.439786
GO:0010457	centriole-centriole cohesion	biological_process	9	1	529	6	5749	0.439786
GO:0015908	fatty acid transport	biological_process	10	1	529	6	5749	0.439786
GO:0015266	protein channel activity	molecular_function	7	1	529	6	5749	0.439786
GO:1990023	mitotic spindle midzone	cellular_component	11	1	529	6	5749	0.439786
GO:2000617	positive regulation of histone H3-K9 acetylation	biological_process	12	1	529	6	5749	0.439786
GO:1900181	negative regulation of protein localization to nucleus	biological_process	5	1	529	6	5749	0.439786
GO:0009888	tissue development	biological_process	5	1	529	6	5749	0.439786
GO:0097038	perinuclear endoplasmic reticulum	cellular_component	11	1	529	6	5749	0.439786
GO:0015937	coenzyme A biosynthetic process	biological_process	11	1	529	6	5749	0.439786
GO:0008544	epidermis development	biological_process	9	1	529	6	5749	0.439786
GO:0005088	Ras guanyl-nucleotide exchange factor activity	molecular_function	4	1	529	6	5749	0.439786
GO:0005549	odorant binding	molecular_function	4	1	529	6	5749	0.439786
GO:0048791	calcium ion-regulated exocytosis of neurotransmitter	biological_process	9	1	529	6	5749	0.439786
GO:0010369	chromocenter	cellular_component	12	1	529	6	5749	0.439786
GO:0070840	dynein complex binding	molecular_function	6	1	529	6	5749	0.439786
GO:0030285	integral component of synaptic vesicle membrane	cellular_component	11	1	529	6	5749	0.439786
GO:0015914	phospholipid transport	biological_process	8	2	529	16	5749	0.440698
GO:0008203	cholesterol metabolic process	biological_process	8	2	529	16	5749	0.440698
GO:0051287	NAD binding	molecular_function	6	2	529	16	5749	0.440698
GO:0043197	dendritic spine	cellular_component	8	2	529	16	5749	0.440698
GO:0005876	spindle microtubule	cellular_component	10	2	529	16	5749	0.440698
GO:0000070	mitotic sister chromatid segregation	biological_process	8	2	529	16	5749	0.440698
GO:0045666	positive regulation of neuron differentiation	biological_process	11	2	529	16	5749	0.440698
GO:0042383	sarcolemma	cellular_component	6	2	529	16	5749	0.440698
GO:0032755	positive regulation of interleukin-6 production	biological_process	8	2	529	16	5749	0.440698
GO:0019706	protein-cysteine S-palmitoyltransferase activity	molecular_function	8	2	529	16	5749	0.440698
GO:0043330	response to exogenous dsRNA	biological_process	8	2	529	16	5749	0.440698
GO:0048666	neuron development	biological_process	10	2	529	16	5749	0.440698
GO:0070301	cellular response to hydrogen peroxide	biological_process	8	2	529	16	5749	0.440698
GO:0046580	negative regulation of Ras protein signal transduction	biological_process	11	2	529	16	5749	0.440698
GO:0030992	intraciliary transport particle B	cellular_component	6	2	529	16	5749	0.440698
GO:0030218	erythrocyte differentiation	biological_process	6	2	529	16	5749	0.440698
GO:0070536	protein K63-linked deubiquitination	biological_process	11	2	529	16	5749	0.440698
GO:0051726	regulation of cell cycle	biological_process	6	6	529	58	5749	0.445932
GO:0005741	mitochondrial outer membrane	cellular_component	13	4	529	37	5749	0.447092
GO:0007050	cell cycle arrest	biological_process	7	4	529	37	5749	0.447092
GO:0007275	multicellular organism development	biological_process	5	9	529	90	5749	0.448719
GO:0006886	intracellular protein transport	biological_process	7	10	529	101	5749	0.453266
GO:0034220	ion transmembrane transport	biological_process	6	3	529	27	5749	0.458418
GO:0032088	negative regulation of NF-kappaB transcription factor activity	biological_process	14	3	529	27	5749	0.458418
GO:0005871	kinesin complex	cellular_component	12	3	529	27	5749	0.458418
GO:0031647	regulation of protein stability	biological_process	9	3	529	27	5749	0.458418
GO:0000287	magnesium ion binding	molecular_function	7	7	529	70	5749	0.46787
GO:0019904	protein domain specific binding	molecular_function	5	8	529	81	5749	0.472087
GO:0000027	ribosomal large subunit assembly	biological_process	7	2	529	17	5749	0.472594
GO:0042470	melanosome	cellular_component	12	2	529	17	5749	0.472594
GO:0045177	apical part of cell	cellular_component	5	2	529	17	5749	0.472594
GO:0090002	establishment of protein localization to plasma membrane	biological_process	7	2	529	17	5749	0.472594
GO:0010575	positive regulation of vascular endothelial growth factor production	biological_process	8	2	529	17	5749	0.472594
GO:0008144	drug binding	molecular_function	4	2	529	17	5749	0.472594
GO:0045071	negative regulation of viral genome replication	biological_process	9	2	529	17	5749	0.472594
GO:0051259	protein oligomerization	biological_process	8	2	529	17	5749	0.472594
GO:0005811	lipid particle	cellular_component	9	2	529	17	5749	0.472594
GO:0045214	sarcomere organization	biological_process	9	2	529	17	5749	0.472594
GO:0016616	oxidoreductase activity, acting on the CH-OH group of donors, NAD or NADP as acceptor	molecular_function	6	2	529	17	5749	0.472594
GO:0005484	SNAP receptor activity	molecular_function	5	2	529	17	5749	0.472594
GO:0071346	cellular response to interferon-gamma	biological_process	7	2	529	17	5749	0.472594
GO:0006890	retrograde vesicle-mediated transport, Golgi to ER	biological_process	7	2	529	17	5749	0.472594
GO:0005506	iron ion binding	molecular_function	8	5	529	49	5749	0.474548
GO:0006470	protein dephosphorylation	biological_process	8	9	529	92	5749	0.475645
GO:0006606	protein import into nucleus	biological_process	6	3	529	28	5749	0.482964
GO:0005819	spindle	cellular_component	9	3	529	28	5749	0.482964
GO:0090305	nucleic acid phosphodiester bond hydrolysis	biological_process	8	4	529	39	5749	0.488779
GO:0008134	transcription factor binding	molecular_function	5	10	529	104	5749	0.491355
GO:0048240	sperm capacitation	biological_process	10	1	529	7	5749	0.491388
GO:0045947	negative regulation of translational initiation	biological_process	10	1	529	7	5749	0.491388
GO:0017091	AU-rich element binding	molecular_function	7	1	529	7	5749	0.491388
GO:0070527	platelet aggregation	biological_process	7	1	529	7	5749	0.491388
GO:0010719	negative regulation of epithelial to mesenchymal transition	biological_process	12	1	529	7	5749	0.491388
GO:0031985	Golgi cisterna	cellular_component	12	1	529	7	5749	0.491388
GO:0090103	cochlea morphogenesis	biological_process	11	1	529	7	5749	0.491388
GO:0016043	cellular component organization	biological_process	4	1	529	7	5749	0.491388
GO:0008608	attachment of spindle microtubules to kinetochore	biological_process	8	1	529	7	5749	0.491388
GO:0006695	cholesterol biosynthetic process	biological_process	9	1	529	7	5749	0.491388
GO:0009409	response to cold	biological_process	5	1	529	7	5749	0.491388
GO:0070507	regulation of microtubule cytoskeleton organization	biological_process	7	1	529	7	5749	0.491388
GO:0010181	FMN binding	molecular_function	7	1	529	7	5749	0.491388
GO:0015075	ion transmembrane transporter activity	molecular_function	6	1	529	7	5749	0.491388
GO:0001164	RNA polymerase I CORE element sequence-specific DNA binding	molecular_function	11	1	529	7	5749	0.491388
GO:0006308	DNA catabolic process	biological_process	8	1	529	7	5749	0.491388
GO:0019216	regulation of lipid metabolic process	biological_process	6	1	529	7	5749	0.491388
GO:0016540	protein autoprocessing	biological_process	8	1	529	7	5749	0.491388
GO:0033598	mammary gland epithelial cell proliferation	biological_process	11	1	529	7	5749	0.491388
GO:0042734	presynaptic membrane	cellular_component	8	1	529	7	5749	0.491388
GO:1903861	positive regulation of dendrite extension	NA	NA	1	529	7	5749	0.491388
GO:0097228	sperm principal piece	cellular_component	9	1	529	7	5749	0.491388
GO:0044389	ubiquitin-like protein ligase binding	molecular_function	6	1	529	7	5749	0.491388
GO:1903363	negative regulation of cellular protein catabolic process	biological_process	9	1	529	7	5749	0.491388
GO:0061436	establishment of skin barrier	biological_process	9	1	529	7	5749	0.491388
GO:0031514	motile cilium	cellular_component	7	2	529	18	5749	0.503367
GO:0042552	myelination	biological_process	10	2	529	18	5749	0.503367
GO:0006950	response to stress	biological_process	4	2	529	18	5749	0.503367
GO:0006302	double-strand break repair	biological_process	10	2	529	18	5749	0.503367
GO:0007173	epidermal growth factor receptor signaling pathway	biological_process	11	2	529	18	5749	0.503367
GO:0010501	RNA secondary structure unwinding	biological_process	9	2	529	18	5749	0.503367
GO:0048013	ephrin receptor signaling pathway	biological_process	10	2	529	18	5749	0.503367
GO:0043086	negative regulation of catalytic activity	biological_process	5	2	529	18	5749	0.503367
GO:0000049	tRNA binding	molecular_function	7	2	529	18	5749	0.503367
GO:0060291	long-term synaptic potentiation	biological_process	10	2	529	18	5749	0.503367
GO:0032868	response to insulin	biological_process	7	2	529	18	5749	0.503367
GO:0070588	calcium ion transmembrane transport	biological_process	7	3	529	29	5749	0.506969
GO:0007018	microtubule-based movement	biological_process	6	4	529	40	5749	0.509138
GO:0072562	blood microparticle	cellular_component	6	4	529	40	5749	0.509138
GO:0005102	receptor binding	molecular_function	5	10	529	106	5749	0.516394
GO:0003682	chromatin binding	molecular_function	4	14	529	150	5749	0.519704
GO:0005096	GTPase activator activity	molecular_function	5	9	529	96	5749	0.528516
GO:0003777	microtubule motor activity	molecular_function	10	4	529	41	5749	0.529124
GO:0042593	glucose homeostasis	biological_process	8	4	529	41	5749	0.529124
GO:0032922	circadian regulation of gene expression	biological_process	8	3	529	30	5749	0.53038
GO:0061077	chaperone-mediated protein folding	biological_process	8	3	529	30	5749	0.53038
GO:0008236	serine-type peptidase activity	molecular_function	7	3	529	30	5749	0.53038
GO:0035264	multicellular organism growth	biological_process	5	3	529	30	5749	0.53038
GO:0031175	neuron projection development	biological_process	6	3	529	30	5749	0.53038
GO:0061025	membrane fusion	biological_process	6	2	529	19	5749	0.532955
GO:0006821	chloride transport	biological_process	8	2	529	19	5749	0.532955
[truncated: 361 more rows]
