# Supplementary material for: Genome-wide analysis of long non-coding RNA expression profile in porcine circovirus 2-infected intestinal porcine epithelial cell line by RNA sequencing
Source: PeerJ. 2019 Mar 6;7:e6577. doi: 10.7717/peerj.6577 (PMC6408913; doi:10.7717/peerj.6577)
Supplement: Supplemental Information 12 [file peerj-07-6577-s012.xlsx]

## Sheet: Sheet1
pathway_id	pathway_name	S gene number	TS gene number	B gene number	TB gene number	pvalue
ko04060	Cytokine-cytokine receptor interaction	31	181	92	1751	3.01634e-10
ko05146	Amoebiasis	20	181	53	1751	6.79114e-08
ko05132	Salmonella infection	19	181	52	1751	2.71659e-07
ko05144	Malaria	15	181	35	1751	4.76288e-07
ko05134	Legionellosis	16	181	42	1751	1.33027e-06
ko04668	TNF signaling pathway	20	181	70	1751	1.10159e-05
ko03430	Mismatch repair	8	181	15	1751	3.82271e-05
ko04010	MAPK signaling pathway	25	181	111	1751	7.90182e-05
ko05133	Pertussis	16	181	57	1751	0.000112645
ko04640	Hematopoietic cell lineage	16	181	57	1751	0.000112645
ko04932	Non-alcoholic fatty liver disease (NAFLD)	21	181	91	1751	0.000215956
ko05323	Rheumatoid arthritis	13	181	43	1751	0.000225735
ko05321	Inflammatiory bowel disease (IBD	11	181	35	1751	0.000481604
ko05020	Prion diseases	8	181	22	1751	0.00100055
ko05219	Bladder cancer	6	181	13	1751	0.00103825
ko04621	NOD-like receptor signaling pathway	10	181	33	1751	0.00120674
ko05332	Graft-versus-host disease	7	181	19	1751	0.00192433
ko04145	Phagosome	15	181	68	1751	0.00291756
ko05164	Influenza A	17	181	82	1751	0.00313821
ko05202	Transcriptional misregulation in cancers	16	181	80	1751	0.00602266
ko05143	African trypanosomiasis	7	181	23	1751	0.00653759
ko04068	FoxO signaling pathway	14	181	67	1751	0.00673034
ko04623	Cytosolic DNA-sensing pathway	8	181	31	1751	0.0109033
ko00480	Glutathione metabolism	6	181	20	1751	0.0126374
ko01230	Biosynthesis of amino acids	9	181	39	1751	0.0150052
ko05152	Tuberculosis	16	181	88	1751	0.0152681
ko04727	GABAergic synapse	7	181	27	1751	0.0165736
ko04630	Jak-STAT signaling pathway	14	181	75	1751	0.0182728
ko03410	Base excision repair	5	181	16	1751	0.018898
ko04721	Synaptic vesicle cycle	7	181	29	1751	0.0243917
ko05166	HTLV-I infection	20	181	125	1751	0.0272658
ko03060	Protein export	4	181	12	1751	0.0281255
ko00061	Fatty acid biosynthesis	2	181	3	1751	0.0297206
ko04012	ErbB signaling pathway	8	181	37	1751	0.0311182
ko04620	Toll-like receptor signaling pathway	10	181	52	1751	0.0360426
ko04974	Protein digestion and absorption	6	181	25	1751	0.0373364
ko04330	Notch signaling pathway	6	181	25	1751	0.0373364
ko04672	Intestinal immune network for IgA production	6	181	25	1751	0.0373364
ko05032	Morphine addiction	6	181	25	1751	0.0373364
ko03030	DNA replication	4	181	13	1751	0.0374246
ko00514	Other types of O-glycan biosynthesis	4	181	13	1751	0.0374246
ko05033	Nicotine addiction	3	181	8	1751	0.0411357
ko04612	Antigen processing and presentation	7	181	33	1751	0.0469068
ko04062	Chemokine signaling pathway	12	181	70	1751	0.0506956
ko00270	Cysteine and methionine metabolism	6	181	28	1751	0.0612957
ko04962	Vasopressin-regulated water reabsorption	5	181	22	1751	0.0685595
ko05410	Hypertrophic cardiomyopathy (HCM	7	181	36	1751	0.0704705
ko05215	Prostate cancer	8	181	44	1751	0.0766407
ko04151	PI3K-Akt signaling pathway	18	181	124	1751	0.0802418
ko04722	Neurotrophin signaling pathway	10	181	60	1751	0.0832688
ko00603	Glycosphingolipid biosynthesis - globo series	2	181	5	1751	0.0861771
ko02010	ABC transporters	4	181	17	1751	0.090022
ko05161	Hepatitis B	12	181	77	1751	0.0923154
ko04064	NF-kappa B signaling pathway	8	181	47	1751	0.104385
ko05210	Colorectal cancer	6	181	32	1751	0.104704
ko00330	Arginine and proline metabolism	6	181	32	1751	0.104704
ko04146	Peroxisome	6	181	32	1751	0.104704
ko00250	Alanine, aspartate and glutamate metabolism	4	181	18	1751	0.10681
ko04978	Mineral absorption	4	181	18	1751	0.10681
ko05416	Viral myocarditis	5	181	25	1751	0.107701
ko04650	Natural killer cell mediated cytotoxicity	7	181	40	1751	0.111159
ko04390	Hippo signaling pathway	9	181	56	1751	0.11642
ko00604	Glycosphingolipid biosynthesis - ganglio series	2	181	6	1751	0.120681
ko04360	Axon guidance	8	181	49	1751	0.125618
ko05010	Alzheimer's disease	12	181	84	1751	0.150369
ko00450	Selenocompound metabolism	2	181	7	1751	0.157838
ko00564	Glycerophospholipid metabolism	6	181	36	1751	0.160456
ko04142	Lysosome	8	181	52	1751	0.161348
ko05142	Chagas disease (American trypanosomiasis)	8	181	52	1751	0.161348
ko04720	Long-term potentiation	4	181	21	1751	0.164552
ko05223	Non-small cell lung cancer	4	181	21	1751	0.164552
ko03050	Proteasome	5	181	29	1751	0.173172
ko03015	mRNA surveillance pathway	7	181	45	1751	0.176019
ko04540	Gap junction	6	181	37	1751	0.176096
ko05200	Pathways in cancer	20	181	157	1751	0.182673
ko05203	Viral carcinogenesis	12	181	88	1751	0.19058
ko04510	Focal adhesion	9	181	63	1751	0.196297
ko04140	Regulation of autophagy	3	181	15	1751	0.196566
ko00020	Citrate cycle (TCA cycle	3	181	15	1751	0.196566
ko00561	Glycerolipid metabolism	4	181	23	1751	0.208054
ko04710	Circadian rhythm	4	181	23	1751	0.208054
ko03420	Nucleotide excision repair	4	181	23	1751	0.208054
ko05162	Measles	9	181	64	1751	0.209302
ko05012	Parkinson's disease	10	181	73	1751	0.215405
ko04910	Insulin signaling pathway	9	181	65	1751	0.222649
ko00260	Glycine, serine and threonine metabolism	3	181	16	1751	0.224706
ko05218	Melanoma	4	181	24	1751	0.23094
ko04726	Serotonergic synapse	4	181	24	1751	0.23094
ko04914	Progesterone-mediated oocyte maturation	6	181	41	1751	0.244142
ko04152	AMPK signaling pathway	7	181	51	1751	0.270152
ko00040	Pentose and glucuronate interconversions	2	181	10	1751	0.276899
ko01210	2-Oxocarboxylic acid metabolism	2	181	10	1751	0.276899
ko05213	Endometrial cancer	4	181	26	1751	0.278353
ko05212	Pancreatic cancer	4	181	26	1751	0.278353
ko04810	Regulation of actin cytoskeleton	11	181	87	1751	0.282837
ko04730	Long-term depression	3	181	18	1751	0.282918
ko05016	Huntington's disease	12	181	97	1751	0.296217
ko04666	Fc gamma R-mediated phagocytosis	6	181	44	1751	0.299513
ko04918	Thyroid hormone synthesis	4	181	27	1751	0.302638
ko04940	Type I diabetes mellitus	3	181	19	1751	0.312547
ko05014	Amyotrophic lateral sclerosis (ALS)	2	181	11	1751	0.31704
ko05034	Alcoholism	8	181	63	1751	0.323188
ko04066	HIF-1 signaling pathway	6	181	46	1751	0.337694
ko04723	Retrograde endocannabinoid signaling	3	181	20	1751	0.342258
ko05206	MicroRNAs in cancer	9	181	75	1751	0.369753
ko00640	Propanoate metabolism	3	181	21	1751	0.371876
ko04919	Thyroid hormone signaling pathway	6	181	48	1751	0.376397
ko04150	mTOR signaling pathway	4	181	30	1751	0.376447
ko04512	ECM-receptor interaction	4	181	30	1751	0.376447
ko05340	Primary immunodeficiency	2	181	13	1751	0.395419
ko05216	Thyroid cancer	2	181	13	1751	0.395419
ko04141	Protein processing in endoplasmic reticulum	10	181	87	1751	0.411088
ko04921	Oxytocin signaling pathway	7	181	60	1751	0.428076
ko00983	Drug metabolism - other enzymes	2	181	14	1751	0.433091
ko04115	p53 signaling pathway	4	181	33	1751	0.449596
ko00563	Glycosylphosphatidylinositol(GPI)-anchor biosynthesis	2	181	15	1751	0.469479
ko01212	Fatty acid metabolism	2	181	15	1751	0.469479
ko00360	Phenylalanine metabolism	1	181	6	1751	0.4809
ko03008	Ribosome biogenesis in eukaryotes	5	181	45	1751	0.504442
ko04210	Apoptosis	5	181	45	1751	0.504442
ko03022	Basal transcription factors	2	181	16	1751	0.504447
ko00970	Aminoacyl-tRNA biosynthesis	3	181	26	1751	0.513701
ko05211	Renal cell carcinoma	4	181	36	1751	0.519893
ko00830	Retinol metabolism	2	181	17	1751	0.537897
ko04976	Bile secretion	2	181	17	1751	0.537897
ko04922	Glucagon signaling pathway	5	181	47	1751	0.54475
ko04130	SNARE interactions in vesicular transport	2	181	18	1751	0.56977
ko05150	Staphylococcus aureus infection	2	181	18	1751	0.56977
ko00980	Metabolism of xenobiotics by cytochrome P450	2	181	18	1751	0.56977
ko05160	Hepatitis C	6	181	59	1751	0.582436
ko04912	GnRH signaling pathway	4	181	39	1751	0.585742
ko00410	beta-Alanine metabolism	2	181	19	1751	0.600031
ko00982	Drug metabolism - cytochrome P450	2	181	19	1751	0.600031
ko04961	Endocrine and other factor-regulated calcium reabsorption	2	181	19	1751	0.600031
ko00190	Oxidative phosphorylation	6	181	61	1751	0.616361
ko00511	Other glycan degradation	1	181	9	1751	0.62633
ko04520	Adherens junction	3	181	31	1751	0.636899
ko04380	Osteoclast differentiation	6	181	63	1751	0.648712
ko05214	Glioma	2	181	21	1751	0.655704
ko05221	Acute myeloid leukemia	2	181	21	1751	0.655704
ko00100	Steroid biosynthesis	1	181	10	1751	0.665155
ko05310	Asthma	1	181	10	1751	0.665155
ko03010	Ribosome	7	181	75	1751	0.672871
ko05412	Arrhythmogenic right ventricular cardiomyopathy (ARVC)	2	181	22	1751	0.68115
ko05030	Cocaine addiction	2	181	22	1751	0.68115
ko04610	Complement and coagulation cascades	2	181	22	1751	0.68115
ko05205	Proteoglycans in cancer	7	181	76	1751	0.686761
ko05320	Autoimmune thyroid disease	1	181	11	1751	0.699967
ko00770	Pantothenate and CoA biosynthesis	1	181	11	1751	0.699967
ko03320	PPAR signaling pathway	2	181	23	1751	0.705048
ko05204	Chemical carcinogenesis	2	181	23	1751	0.705048
ko04022	cGMP - PKG signaling pathway	6	181	67	1751	0.708285
ko04270	Vascular smooth muscle contraction	4	181	46	1751	0.717171
ko03013	RNA transport	7	181	79	1751	0.726156
ko04664	Fc epsilon RI signaling pathway	2	181	24	1751	0.727444
ko04911	Insulin secretion	2	181	24	1751	0.727444
ko04260	Cardiac muscle contraction	2	181	24	1751	0.727444
ko05168	Herpes simplex infection	9	181	101	1751	0.73557
ko04350	TGF-beta signaling pathway	3	181	36	1751	0.736732
ko04015	Rap1 signaling pathway	7	181	80	1751	0.738515
ko05031	Amphetamine addiction	2	181	25	1751	0.748392
ko01200	Carbon metabolism	4	181	48	1751	0.748563
ko04915	Estrogen signaling pathway	4	181	49	1751	0.763238
ko05140	Leishmaniasis	3	181	38	1751	0.770124
ko04971	Gastric acid secretion	1	181	14	1751	0.784239
ko04020	Calcium signaling pathway	4	181	51	1751	0.790593
ko05330	Allograft rejection	1	181	15	1751	0.806722
ko04622	RIG-I-like receptor signaling pathway	2	181	29	1751	0.818909
ko05230	Central carbon metabolism in cancer	2	181	29	1751	0.818909
ko05322	Systemic lupus erythematosus	3	181	42	1751	0.826578
ko04110	Cell cycle	4	181	54	1751	0.82685
ko00565	Ether lipid metabolism	1	181	16	1751	0.826874
ko04070	Phosphatidylinositol signaling system	2	181	30	1751	0.83354
ko05414	Dilated cardiomyopathy (DCM)	2	181	30	1751	0.83354
ko05220	Chronic myeloid leukemia	2	181	31	1751	0.847102
ko04530	Tight junction	4	181	56	1751	0.848034
ko05169	Epstein-Barr virus infection	7	181	91	1751	0.849238
ko04310	Wnt signaling pathway	4	181	58	1751	0.867002
ko04340	Hedgehog signaling pathway	1	181	19	1751	0.875626
ko00230	Purine metabolism	4	181	60	1751	0.883918
ko04611	Platelet activation	3	181	48	1751	0.88896
ko05145	Toxoplasmosis	3	181	48	1751	0.88896
ko04725	Cholinergic synapse	2	181	35	1751	0.891892
ko04930	Type II diabetes mellitus	1	181	22	1751	0.910704
ko05217	Basal cell carcinoma	1	181	22	1751	0.910704
ko04740	Olfactory transduction	1	181	22	1751	0.910704
ko04024	cAMP signaling pathway	4	181	64	1751	0.912239
ko04144	Endocytosis	6	181	89	1751	0.913895
ko00240	Pyrimidine metabolism	2	181	38	1751	0.917166
ko04713	Circadian entrainment	1	181	24	1751	0.928426
ko03040	Spliceosome	3	181	54	1751	0.93056
ko04670	Leukocyte transendothelial migration	2	181	41	1751	0.936832
ko04114	Oocyte meiosis	2	181	41	1751	0.936832
ko05231	Choline metabolism in cancer	2	181	42	1751	0.942345
ko04920	Adipocytokine signaling pathway	1	181	26	1751	0.942646
ko04728	Dopaminergic synapse	2	181	43	1751	0.9474
ko04080	Neuroactive ligand-receptor interaction	2	181	46	1751	0.960163
ko04750	Inflammatory mediator regulation of TRP channels	1	181	30	1751	0.963203
ko04014	Ras signaling pathway	3	181	62	1751	0.963983
ko03018	RNA degradation	1	181	31	1751	0.967073
ko04514	Cell adhesion molecules (CAMs	2	181	50	1751	0.972652
ko04724	Glutamatergic synapse	1	181	36	1751	0.981128
ko04261	Adrenergic signaling in cardiomyocytes	2	181	55	1751	0.983048
ko04120	Ubiquitin mediated proteolysis	2	181	56	1751	0.984609
ko04916	Melanogenesis	1	181	39	1751	0.986498
ko04660	T cell receptor signaling pathway	1	181	48	1751	0.995073
ko04071	Sphingolipid signaling pathway	1	181	50	1751	0.996065
ko04550	Signaling pathways regulating pluripotency of stem cells	1	181	50	1751	0.996065
