# Supplementary material for: Genome-wide analysis of long non-coding RNA expression profile in porcine circovirus 2-infected intestinal porcine epithelial cell line by RNA sequencing
Source: PeerJ. 2019 Mar 6;7:e6577. doi: 10.7717/peerj.6577 (PMC6408913; doi:10.7717/peerj.6577)
Supplement: Supplemental Information 13 [file peerj-07-6577-s013.xlsx]

## Sheet: Sheet1
mRNA							Differentiall expression						lncRNA			Differentiall expression		function
transcript_name	class_code	chr	start	end	gene_id	gene_name	Significant	GO	KEGG	KO_ENTRY	EC	Description	transcript_name	gene_id	gene_name	Significant	Known/novel	cis/trans	cis location	trans energy	Pearson Correlation Coefficient
ENSSSCT00000010298	0	chr11	19465520	19487745	MSTRG.4626	CYSLTR2	yes	GO:0016021(integral component of membrane);GO:0016020(membrane);GO:0061737(leukotriene signaling pathway);GO:0007186(G-protein coupled receptor signaling pathway);GO:0004974(leukotriene receptor activity);GO:0004930(G-protein coupled receptor activity);GO:0001631(cysteinyl leukotriene receptor activity)	NA	K04323	NA	cysteinyl leukotriene receptor 2 [Source:RefSeq peptide;Acc:NP_999295]	MSTRG.4625.3	MSTRG.4625	.	yes	novel	cis	100K	NA	0.997855
ENSSSCT00000031745	0	chr1	9475309	9487684	MSTRG.42	SOD2	yes	GO:0043209(myelin sheath);GO:0005743(mitochondrial inner membrane);GO:0005739(mitochondrion);GO:0055114(oxidation-reduction process);GO:0055093(response to hyperoxia);GO:0055072(iron ion homeostasis);GO:0051881(regulation of mitochondrial membrane potential);GO:0050790(regulation of catalytic activity);GO:0048773(erythrophore differentiation);GO:0048678(response to axon injury);GO:0048666(neuron …	04068(FoxO signaling pathway);04146(Peroxisome);05016(Huntington's disease)	K04564	EC:1.15.1.1	superoxide dismutase 2, mitochondrial [Source:HGNC Symbol;Acc:HGNC:11180]	MSTRG.4592.1	MSTRG.4592	.	yes	novel	trans	NA	-52.89	0.97892
ENSSSCT00000031745	0	chr1	9475309	9487684	MSTRG.42	SOD2	yes	GO:0043209(myelin sheath);GO:0005743(mitochondrial inner membrane);GO:0005739(mitochondrion);GO:0055114(oxidation-reduction process);GO:0055093(response to hyperoxia);GO:0055072(iron ion homeostasis);GO:0051881(regulation of mitochondrial membrane potential);GO:0050790(regulation of catalytic activity);GO:0048773(erythrophore differentiation);GO:0048678(response to axon injury);GO:0048666(neuron …	04068(FoxO signaling pathway);04146(Peroxisome);05016(Huntington's disease)	K04564	EC:1.15.1.1	superoxide dismutase 2, mitochondrial [Source:HGNC Symbol;Acc:HGNC:11180]	MSTRG.4625.3	MSTRG.4625	.	yes	novel	trans	NA	-45.22	0.997256
ENSSSCT00000031745	0	chr1	9475309	9487684	MSTRG.42	SOD2	yes	GO:0043209(myelin sheath);GO:0005743(mitochondrial inner membrane);GO:0005739(mitochondrion);GO:0055114(oxidation-reduction process);GO:0055093(response to hyperoxia);GO:0055072(iron ion homeostasis);GO:0051881(regulation of mitochondrial membrane potential);GO:0050790(regulation of catalytic activity);GO:0048773(erythrophore differentiation);GO:0048678(response to axon injury);GO:0048666(neuron …	04068(FoxO signaling pathway);04146(Peroxisome);05016(Huntington's disease)	K04564	EC:1.15.1.1	superoxide dismutase 2, mitochondrial [Source:HGNC Symbol;Acc:HGNC:11180]	MSTRG.5643.1	MSTRG.5643	MYL4	yes	novel	trans	NA	-35.91	-0.95929
ENSSSCT00000031745	0	chr1	9475309	9487684	MSTRG.42	SOD2	yes	GO:0043209(myelin sheath);GO:0005743(mitochondrial inner membrane);GO:0005739(mitochondrion);GO:0055114(oxidation-reduction process);GO:0055093(response to hyperoxia);GO:0055072(iron ion homeostasis);GO:0051881(regulation of mitochondrial membrane potential);GO:0050790(regulation of catalytic activity);GO:0048773(erythrophore differentiation);GO:0048678(response to axon injury);GO:0048666(neuron …	04068(FoxO signaling pathway);04146(Peroxisome);05016(Huntington's disease)	K04564	EC:1.15.1.1	superoxide dismutase 2, mitochondrial [Source:HGNC Symbol;Acc:HGNC:11180]	MSTRG.6301.1	MSTRG.6301	.	yes	novel	trans	NA	-37.98	0.952619
ENSSSCT00000031745	0	chr1	9475309	9487684	MSTRG.42	SOD2	yes	GO:0043209(myelin sheath);GO:0005743(mitochondrial inner membrane);GO:0005739(mitochondrion);GO:0055114(oxidation-reduction process);GO:0055093(response to hyperoxia);GO:0055072(iron ion homeostasis);GO:0051881(regulation of mitochondrial membrane potential);GO:0050790(regulation of catalytic activity);GO:0048773(erythrophore differentiation);GO:0048678(response to axon injury);GO:0048666(neuron …	04068(FoxO signaling pathway);04146(Peroxisome);05016(Huntington's disease)	K04564	EC:1.15.1.1	superoxide dismutase 2, mitochondrial [Source:HGNC Symbol;Acc:HGNC:11180]	MSTRG.6500.1	MSTRG.6500	.	yes	novel	trans	NA	-35.53	0.985396
ENSSSCT00000031745	0	chr1	9475309	9487684	MSTRG.42	SOD2	yes	GO:0043209(myelin sheath);GO:0005743(mitochondrial inner membrane);GO:0005739(mitochondrion);GO:0055114(oxidation-reduction process);GO:0055093(response to hyperoxia);GO:0055072(iron ion homeostasis);GO:0051881(regulation of mitochondrial membrane potential);GO:0050790(regulation of catalytic activity);GO:0048773(erythrophore differentiation);GO:0048678(response to axon injury);GO:0048666(neuron …	04068(FoxO signaling pathway);04146(Peroxisome);05016(Huntington's disease)	K04564	EC:1.15.1.1	superoxide dismutase 2, mitochondrial [Source:HGNC Symbol;Acc:HGNC:11180]	MSTRG.7277.1	MSTRG.7277	.	yes	novel	trans	NA	-45.37	-0.953987
ENSSSCT00000031745	0	chr1	9475309	9487684	MSTRG.42	SOD2	yes	GO:0043209(myelin sheath);GO:0005743(mitochondrial inner membrane);GO:0005739(mitochondrion);GO:0055114(oxidation-reduction process);GO:0055093(response to hyperoxia);GO:0055072(iron ion homeostasis);GO:0051881(regulation of mitochondrial membrane potential);GO:0050790(regulation of catalytic activity);GO:0048773(erythrophore differentiation);GO:0048678(response to axon injury);GO:0048666(neuron …	04068(FoxO signaling pathway);04146(Peroxisome);05016(Huntington's disease)	K04564	EC:1.15.1.1	superoxide dismutase 2, mitochondrial [Source:HGNC Symbol;Acc:HGNC:11180]	MSTRG.7456.1	MSTRG.7456	IL17RB	yes	novel	trans	NA	-40.73	-0.958331
ENSSSCT00000031745	0	chr1	9475309	9487684	MSTRG.42	SOD2	yes	GO:0043209(myelin sheath);GO:0005743(mitochondrial inner membrane);GO:0005739(mitochondrion);GO:0055114(oxidation-reduction process);GO:0055093(response to hyperoxia);GO:0055072(iron ion homeostasis);GO:0051881(regulation of mitochondrial membrane potential);GO:0050790(regulation of catalytic activity);GO:0048773(erythrophore differentiation);GO:0048678(response to axon injury);GO:0048666(neuron …	04068(FoxO signaling pathway);04146(Peroxisome);05016(Huntington's disease)	K04564	EC:1.15.1.1	superoxide dismutase 2, mitochondrial [Source:HGNC Symbol;Acc:HGNC:11180]	MSTRG.8436.1	MSTRG.8436	.	yes	novel	trans	NA	-25.95	0.961778
ENSSSCT00000031745	0	chr1	9475309	9487684	MSTRG.42	SOD2	yes	GO:0043209(myelin sheath);GO:0005743(mitochondrial inner membrane);GO:0005739(mitochondrion);GO:0055114(oxidation-reduction process);GO:0055093(response to hyperoxia);GO:0055072(iron ion homeostasis);GO:0051881(regulation of mitochondrial membrane potential);GO:0050790(regulation of catalytic activity);GO:0048773(erythrophore differentiation);GO:0048678(response to axon injury);GO:0048666(neuron …	04068(FoxO signaling pathway);04146(Peroxisome);05016(Huntington's disease)	K04564	EC:1.15.1.1	superoxide dismutase 2, mitochondrial [Source:HGNC Symbol;Acc:HGNC:11180]	MSTRG.8811.1	MSTRG.8811	.	yes	novel	trans	NA	-45.92	0.962972
ENSSSCT00000031745	0	chr1	9475309	9487684	MSTRG.42	SOD2	yes	GO:0043209(myelin sheath);GO:0005743(mitochondrial inner membrane);GO:0005739(mitochondrion);GO:0055114(oxidation-reduction process);GO:0055093(response to hyperoxia);GO:0055072(iron ion homeostasis);GO:0051881(regulation of mitochondrial membrane potential);GO:0050790(regulation of catalytic activity);GO:0048773(erythrophore differentiation);GO:0048678(response to axon injury);GO:0048666(neuron …	04068(FoxO signaling pathway);04146(Peroxisome);05016(Huntington's disease)	K04564	EC:1.15.1.1	superoxide dismutase 2, mitochondrial [Source:HGNC Symbol;Acc:HGNC:11180]	MSTRG.8882.1	MSTRG.8882	.	yes	novel	trans	NA	-24.48	-0.965308
ENSSSCT00000031745	0	chr1	9475309	9487684	MSTRG.42	SOD2	yes	GO:0043209(myelin sheath);GO:0005743(mitochondrial inner membrane);GO:0005739(mitochondrion);GO:0055114(oxidation-reduction process);GO:0055093(response to hyperoxia);GO:0055072(iron ion homeostasis);GO:0051881(regulation of mitochondrial membrane potential);GO:0050790(regulation of catalytic activity);GO:0048773(erythrophore differentiation);GO:0048678(response to axon injury);GO:0048666(neuron …	04068(FoxO signaling pathway);04146(Peroxisome);05016(Huntington's disease)	K04564	EC:1.15.1.1	superoxide dismutase 2, mitochondrial [Source:HGNC Symbol;Acc:HGNC:11180]	MSTRG.11081.1	MSTRG.11081	.	yes	novel	trans	NA	-27.62	-0.98537
ENSSSCT00000031745	0	chr1	9475309	9487684	MSTRG.42	SOD2	yes	GO:0043209(myelin sheath);GO:0005743(mitochondrial inner membrane);GO:0005739(mitochondrion);GO:0055114(oxidation-reduction process);GO:0055093(response to hyperoxia);GO:0055072(iron ion homeostasis);GO:0051881(regulation of mitochondrial membrane potential);GO:0050790(regulation of catalytic activity);GO:0048773(erythrophore differentiation);GO:0048678(response to axon injury);GO:0048666(neuron …	04068(FoxO signaling pathway);04146(Peroxisome);05016(Huntington's disease)	K04564	EC:1.15.1.1	superoxide dismutase 2, mitochondrial [Source:HGNC Symbol;Acc:HGNC:11180]	MSTRG.11777.1	MSTRG.11777	.	yes	novel	trans	NA	-49.50	0.976057
ENSSSCT00000031745	0	chr1	9475309	9487684	MSTRG.42	SOD2	yes	GO:0043209(myelin sheath);GO:0005743(mitochondrial inner membrane);GO:0005739(mitochondrion);GO:0055114(oxidation-reduction process);GO:0055093(response to hyperoxia);GO:0055072(iron ion homeostasis);GO:0051881(regulation of mitochondrial membrane potential);GO:0050790(regulation of catalytic activity);GO:0048773(erythrophore differentiation);GO:0048678(response to axon injury);GO:0048666(neuron …	04068(FoxO signaling pathway);04146(Peroxisome);05016(Huntington's disease)	K04564	EC:1.15.1.1	superoxide dismutase 2, mitochondrial [Source:HGNC Symbol;Acc:HGNC:11180]	MSTRG.12511.1	MSTRG.12511	.	yes	novel	trans	NA	-42.23	0.960298
ENSSSCT00000031745	0	chr1	9475309	9487684	MSTRG.42	SOD2	yes	GO:0043209(myelin sheath);GO:0005743(mitochondrial inner membrane);GO:0005739(mitochondrion);GO:0055114(oxidation-reduction process);GO:0055093(response to hyperoxia);GO:0055072(iron ion homeostasis);GO:0051881(regulation of mitochondrial membrane potential);GO:0050790(regulation of catalytic activity);GO:0048773(erythrophore differentiation);GO:0048678(response to axon injury);GO:0048666(neuron …	04068(FoxO signaling pathway);04146(Peroxisome);05016(Huntington's disease)	K04564	EC:1.15.1.1	superoxide dismutase 2, mitochondrial [Source:HGNC Symbol;Acc:HGNC:11180]	MSTRG.13663.1	MSTRG.13663	.	yes	novel	trans	NA	-49.05	0.960673
ENSSSCT00000031745	0	chr1	9475309	9487684	MSTRG.42	SOD2	yes	GO:0043209(myelin sheath);GO:0005743(mitochondrial inner membrane);GO:0005739(mitochondrion);GO:0055114(oxidation-reduction process);GO:0055093(response to hyperoxia);GO:0055072(iron ion homeostasis);GO:0051881(regulation of mitochondrial membrane potential);GO:0050790(regulation of catalytic activity);GO:0048773(erythrophore differentiation);GO:0048678(response to axon injury);GO:0048666(neuron …	04068(FoxO signaling pathway);04146(Peroxisome);05016(Huntington's disease)	K04564	EC:1.15.1.1	superoxide dismutase 2, mitochondrial [Source:HGNC Symbol;Acc:HGNC:11180]	MSTRG.13917.1	MSTRG.13917	.	yes	novel	trans	NA	-27.90	0.961513
ENSSSCT00000031745	0	chr1	9475309	9487684	MSTRG.42	SOD2	yes	GO:0043209(myelin sheath);GO:0005743(mitochondrial inner membrane);GO:0005739(mitochondrion);GO:0055114(oxidation-reduction process);GO:0055093(response to hyperoxia);GO:0055072(iron ion homeostasis);GO:0051881(regulation of mitochondrial membrane potential);GO:0050790(regulation of catalytic activity);GO:0048773(erythrophore differentiation);GO:0048678(response to axon injury);GO:0048666(neuron …	04068(FoxO signaling pathway);04146(Peroxisome);05016(Huntington's disease)	K04564	EC:1.15.1.1	superoxide dismutase 2, mitochondrial [Source:HGNC Symbol;Acc:HGNC:11180]	MSTRG.14046.1	MSTRG.14046	.	yes	novel	trans	NA	-34.16	0.968446
ENSSSCT00000031745	0	chr1	9475309	9487684	MSTRG.42	SOD2	yes	GO:0043209(myelin sheath);GO:0005743(mitochondrial inner membrane);GO:0005739(mitochondrion);GO:0055114(oxidation-reduction process);GO:0055093(response to hyperoxia);GO:0055072(iron ion homeostasis);GO:0051881(regulation of mitochondrial membrane potential);GO:0050790(regulation of catalytic activity);GO:0048773(erythrophore differentiation);GO:0048678(response to axon injury);GO:0048666(neuron …	04068(FoxO signaling pathway);04146(Peroxisome);05016(Huntington's disease)	K04564	EC:1.15.1.1	superoxide dismutase 2, mitochondrial [Source:HGNC Symbol;Acc:HGNC:11180]	MSTRG.14254.1	MSTRG.14254	.	yes	novel	trans	NA	-37.32	0.954177
ENSSSCT00000031745	0	chr1	9475309	9487684	MSTRG.42	SOD2	yes	GO:0043209(myelin sheath);GO:0005743(mitochondrial inner membrane);GO:0005739(mitochondrion);GO:0055114(oxidation-reduction process);GO:0055093(response to hyperoxia);GO:0055072(iron ion homeostasis);GO:0051881(regulation of mitochondrial membrane potential);GO:0050790(regulation of catalytic activity);GO:0048773(erythrophore differentiation);GO:0048678(response to axon injury);GO:0048666(neuron …	04068(FoxO signaling pathway);04146(Peroxisome);05016(Huntington's disease)	K04564	EC:1.15.1.1	superoxide dismutase 2, mitochondrial [Source:HGNC Symbol;Acc:HGNC:11180]	MSTRG.15022.1	MSTRG.15022	CEP250	yes	novel	trans	NA	-36.84	-0.965289
ENSSSCT00000031745	0	chr1	9475309	9487684	MSTRG.42	SOD2	yes	GO:0043209(myelin sheath);GO:0005743(mitochondrial inner membrane);GO:0005739(mitochondrion);GO:0055114(oxidation-reduction process);GO:0055093(response to hyperoxia);GO:0055072(iron ion homeostasis);GO:0051881(regulation of mitochondrial membrane potential);GO:0050790(regulation of catalytic activity);GO:0048773(erythrophore differentiation);GO:0048678(response to axon injury);GO:0048666(neuron …	04068(FoxO signaling pathway);04146(Peroxisome);05016(Huntington's disease)	K04564	EC:1.15.1.1	superoxide dismutase 2, mitochondrial [Source:HGNC Symbol;Acc:HGNC:11180]	MSTRG.15360.1	MSTRG.15360	.	yes	novel	trans	NA	-35.21	-0.959242
ENSSSCT00000031745	0	chr1	9475309	9487684	MSTRG.42	SOD2	yes	GO:0043209(myelin sheath);GO:0005743(mitochondrial inner membrane);GO:0005739(mitochondrion);GO:0055114(oxidation-reduction process);GO:0055093(response to hyperoxia);GO:0055072(iron ion homeostasis);GO:0051881(regulation of mitochondrial membrane potential);GO:0050790(regulation of catalytic activity);GO:0048773(erythrophore differentiation);GO:0048678(response to axon injury);GO:0048666(neuron …	04068(FoxO signaling pathway);04146(Peroxisome);05016(Huntington's disease)	K04564	EC:1.15.1.1	superoxide dismutase 2, mitochondrial [Source:HGNC Symbol;Acc:HGNC:11180]	MSTRG.16154.1	MSTRG.16154	.	yes	novel	trans	NA	-34.13	0.955426
ENSSSCT00000031745	0	chr1	9475309	9487684	MSTRG.42	SOD2	yes	GO:0043209(myelin sheath);GO:0005743(mitochondrial inner membrane);GO:0005739(mitochondrion);GO:0055114(oxidation-reduction process);GO:0055093(response to hyperoxia);GO:0055072(iron ion homeostasis);GO:0051881(regulation of mitochondrial membrane potential);GO:0050790(regulation of catalytic activity);GO:0048773(erythrophore differentiation);GO:0048678(response to axon injury);GO:0048666(neuron …	04068(FoxO signaling pathway);04146(Peroxisome);05016(Huntington's disease)	K04564	EC:1.15.1.1	superoxide dismutase 2, mitochondrial [Source:HGNC Symbol;Acc:HGNC:11180]	MSTRG.16431.1	MSTRG.16431	.	yes	novel	trans	NA	-20.30	-0.951516
ENSSSCT00000031745	0	chr1	9475309	9487684	MSTRG.42	SOD2	yes	GO:0043209(myelin sheath);GO:0005743(mitochondrial inner membrane);GO:0005739(mitochondrion);GO:0055114(oxidation-reduction process);GO:0055093(response to hyperoxia);GO:0055072(iron ion homeostasis);GO:0051881(regulation of mitochondrial membrane potential);GO:0050790(regulation of catalytic activity);GO:0048773(erythrophore differentiation);GO:0048678(response to axon injury);GO:0048666(neuron …	04068(FoxO signaling pathway);04146(Peroxisome);05016(Huntington's disease)	K04564	EC:1.15.1.1	superoxide dismutase 2, mitochondrial [Source:HGNC Symbol;Acc:HGNC:11180]	MSTRG.16577.1	MSTRG.16577	.	yes	novel	trans	NA	-48.89	0.959436
ENSSSCT00000031745	0	chr1	9475309	9487684	MSTRG.42	SOD2	yes	GO:0043209(myelin sheath);GO:0005743(mitochondrial inner membrane);GO:0005739(mitochondrion);GO:0055114(oxidation-reduction process);GO:0055093(response to hyperoxia);GO:0055072(iron ion homeostasis);GO:0051881(regulation of mitochondrial membrane potential);GO:0050790(regulation of catalytic activity);GO:0048773(erythrophore differentiation);GO:0048678(response to axon injury);GO:0048666(neuron …	04068(FoxO signaling pathway);04146(Peroxisome);05016(Huntington's disease)	K04564	EC:1.15.1.1	superoxide dismutase 2, mitochondrial [Source:HGNC Symbol;Acc:HGNC:11180]	MSTRG.16579.1	MSTRG.16579	.	yes	novel	trans	NA	-35.59	0.956933
ENSSSCT00000031745	0	chr1	9475309	9487684	MSTRG.42	SOD2	yes	GO:0043209(myelin sheath);GO:0005743(mitochondrial inner membrane);GO:0005739(mitochondrion);GO:0055114(oxidation-reduction process);GO:0055093(response to hyperoxia);GO:0055072(iron ion homeostasis);GO:0051881(regulation of mitochondrial membrane potential);GO:0050790(regulation of catalytic activity);GO:0048773(erythrophore differentiation);GO:0048678(response to axon injury);GO:0048666(neuron …	04068(FoxO signaling pathway);04146(Peroxisome);05016(Huntington's disease)	K04564	EC:1.15.1.1	superoxide dismutase 2, mitochondrial [Source:HGNC Symbol;Acc:HGNC:11180]	MSTRG.16579.2	MSTRG.16579	.	yes	novel	trans	NA	-37.42	0.97237
ENSSSCT00000031745	0	chr1	9475309	9487684	MSTRG.42	SOD2	yes	GO:0043209(myelin sheath);GO:0005743(mitochondrial inner membrane);GO:0005739(mitochondrion);GO:0055114(oxidation-reduction process);GO:0055093(response to hyperoxia);GO:0055072(iron ion homeostasis);GO:0051881(regulation of mitochondrial membrane potential);GO:0050790(regulation of catalytic activity);GO:0048773(erythrophore differentiation);GO:0048678(response to axon injury);GO:0048666(neuron …	04068(FoxO signaling pathway);04146(Peroxisome);05016(Huntington's disease)	K04564	EC:1.15.1.1	superoxide dismutase 2, mitochondrial [Source:HGNC Symbol;Acc:HGNC:11180]	MSTRG.19520.1	MSTRG.19520	.	yes	novel	trans	NA	-41.62	0.960339
ENSSSCT00000031745	0	chr1	9475309	9487684	MSTRG.42	SOD2	yes	GO:0043209(myelin sheath);GO:0005743(mitochondrial inner membrane);GO:0005739(mitochondrion);GO:0055114(oxidation-reduction process);GO:0055093(response to hyperoxia);GO:0055072(iron ion homeostasis);GO:0051881(regulation of mitochondrial membrane potential);GO:0050790(regulation of catalytic activity);GO:0048773(erythrophore differentiation);GO:0048678(response to axon injury);GO:0048666(neuron …	04068(FoxO signaling pathway);04146(Peroxisome);05016(Huntington's disease)	K04564	EC:1.15.1.1	superoxide dismutase 2, mitochondrial [Source:HGNC Symbol;Acc:HGNC:11180]	MSTRG.19762.1	MSTRG.19762	.	yes	novel	trans	NA	-43.30	0.985545
ENSSSCT00000031745	0	chr1	9475309	9487684	MSTRG.42	SOD2	yes	GO:0043209(myelin sheath);GO:0005743(mitochondrial inner membrane);GO:0005739(mitochondrion);GO:0055114(oxidation-reduction process);GO:0055093(response to hyperoxia);GO:0055072(iron ion homeostasis);GO:0051881(regulation of mitochondrial membrane potential);GO:0050790(regulation of catalytic activity);GO:0048773(erythrophore differentiation);GO:0048678(response to axon injury);GO:0048666(neuron …	04068(FoxO signaling pathway);04146(Peroxisome);05016(Huntington's disease)	K04564	EC:1.15.1.1	superoxide dismutase 2, mitochondrial [Source:HGNC Symbol;Acc:HGNC:11180]	MSTRG.21596.1	MSTRG.21596	.	yes	novel	trans	NA	-48.08	0.978894
ENSSSCT00000031745	0	chr1	9475309	9487684	MSTRG.42	SOD2	yes	GO:0043209(myelin sheath);GO:0005743(mitochondrial inner membrane);GO:0005739(mitochondrion);GO:0055114(oxidation-reduction process);GO:0055093(response to hyperoxia);GO:0055072(iron ion homeostasis);GO:0051881(regulation of mitochondrial membrane potential);GO:0050790(regulation of catalytic activity);GO:0048773(erythrophore differentiation);GO:0048678(response to axon injury);GO:0048666(neuron …	04068(FoxO signaling pathway);04146(Peroxisome);05016(Huntington's disease)	K04564	EC:1.15.1.1	superoxide dismutase 2, mitochondrial [Source:HGNC Symbol;Acc:HGNC:11180]	MSTRG.21860.1	MSTRG.21860	.	yes	novel	trans	NA	-45.51	0.997492
ENSSSCT00000031745	0	chr1	9475309	9487684	MSTRG.42	SOD2	yes	GO:0043209(myelin sheath);GO:0005743(mitochondrial inner membrane);GO:0005739(mitochondrion);GO:0055114(oxidation-reduction process);GO:0055093(response to hyperoxia);GO:0055072(iron ion homeostasis);GO:0051881(regulation of mitochondrial membrane potential);GO:0050790(regulation of catalytic activity);GO:0048773(erythrophore differentiation);GO:0048678(response to axon injury);GO:0048666(neuron …	04068(FoxO signaling pathway);04146(Peroxisome);05016(Huntington's disease)	K04564	EC:1.15.1.1	superoxide dismutase 2, mitochondrial [Source:HGNC Symbol;Acc:HGNC:11180]	MSTRG.22198.1	MSTRG.22198	.	yes	novel	trans	NA	-42.40	0.951116
ENSSSCT00000031745	0	chr1	9475309	9487684	MSTRG.42	SOD2	yes	GO:0043209(myelin sheath);GO:0005743(mitochondrial inner membrane);GO:0005739(mitochondrion);GO:0055114(oxidation-reduction process);GO:0055093(response to hyperoxia);GO:0055072(iron ion homeostasis);GO:0051881(regulation of mitochondrial membrane potential);GO:0050790(regulation of catalytic activity);GO:0048773(erythrophore differentiation);GO:0048678(response to axon injury);GO:0048666(neuron …	04068(FoxO signaling pathway);04146(Peroxisome);05016(Huntington's disease)	K04564	EC:1.15.1.1	superoxide dismutase 2, mitochondrial [Source:HGNC Symbol;Acc:HGNC:11180]	MSTRG.22782.1	MSTRG.22782	.	yes	novel	trans	NA	-32.32	0.978397
ENSSSCT00000031745	0	chr1	9475309	9487684	MSTRG.42	SOD2	yes	GO:0043209(myelin sheath);GO:0005743(mitochondrial inner membrane);GO:0005739(mitochondrion);GO:0055114(oxidation-reduction process);GO:0055093(response to hyperoxia);GO:0055072(iron ion homeostasis);GO:0051881(regulation of mitochondrial membrane potential);GO:0050790(regulation of catalytic activity);GO:0048773(erythrophore differentiation);GO:0048678(response to axon injury);GO:0048666(neuron …	04068(FoxO signaling pathway);04146(Peroxisome);05016(Huntington's disease)	K04564	EC:1.15.1.1	superoxide dismutase 2, mitochondrial [Source:HGNC Symbol;Acc:HGNC:11180]	MSTRG.23105.1	MSTRG.23105	.	yes	novel	trans	NA	-40.43	0.994085
ENSSSCT00000031745	0	chr1	9475309	9487684	MSTRG.42	SOD2	yes	GO:0043209(myelin sheath);GO:0005743(mitochondrial inner membrane);GO:0005739(mitochondrion);GO:0055114(oxidation-reduction process);GO:0055093(response to hyperoxia);GO:0055072(iron ion homeostasis);GO:0051881(regulation of mitochondrial membrane potential);GO:0050790(regulation of catalytic activity);GO:0048773(erythrophore differentiation);GO:0048678(response to axon injury);GO:0048666(neuron …	04068(FoxO signaling pathway);04146(Peroxisome);05016(Huntington's disease)	K04564	EC:1.15.1.1	superoxide dismutase 2, mitochondrial [Source:HGNC Symbol;Acc:HGNC:11180]	MSTRG.23310.1	MSTRG.23310	.	yes	novel	trans	NA	-56.53	-0.954271
ENSSSCT00000031745	0	chr1	9475309	9487684	MSTRG.42	SOD2	yes	GO:0043209(myelin sheath);GO:0005743(mitochondrial inner membrane);GO:0005739(mitochondrion);GO:0055114(oxidation-reduction process);GO:0055093(response to hyperoxia);GO:0055072(iron ion homeostasis);GO:0051881(regulation of mitochondrial membrane potential);GO:0050790(regulation of catalytic activity);GO:0048773(erythrophore differentiation);GO:0048678(response to axon injury);GO:0048666(neuron …	04068(FoxO signaling pathway);04146(Peroxisome);05016(Huntington's disease)	K04564	EC:1.15.1.1	superoxide dismutase 2, mitochondrial [Source:HGNC Symbol;Acc:HGNC:11180]	MSTRG.24277.1	MSTRG.24277	.	yes	novel	trans	NA	-32.38	0.983019
ENSSSCT00000031745	0	chr1	9475309	9487684	MSTRG.42	SOD2	yes	GO:0043209(myelin sheath);GO:0005743(mitochondrial inner membrane);GO:0005739(mitochondrion);GO:0055114(oxidation-reduction process);GO:0055093(response to hyperoxia);GO:0055072(iron ion homeostasis);GO:0051881(regulation of mitochondrial membrane potential);GO:0050790(regulation of catalytic activity);GO:0048773(erythrophore differentiation);GO:0048678(response to axon injury);GO:0048666(neuron …	04068(FoxO signaling pathway);04146(Peroxisome);05016(Huntington's disease)	K04564	EC:1.15.1.1	superoxide dismutase 2, mitochondrial [Source:HGNC Symbol;Acc:HGNC:11180]	MSTRG.24330.1	MSTRG.24330	.	yes	novel	trans	NA	-52.31	0.966873
ENSSSCT00000031745	0	chr1	9475309	9487684	MSTRG.42	SOD2	yes	GO:0043209(myelin sheath);GO:0005743(mitochondrial inner membrane);GO:0005739(mitochondrion);GO:0055114(oxidation-reduction process);GO:0055093(response to hyperoxia);GO:0055072(iron ion homeostasis);GO:0051881(regulation of mitochondrial membrane potential);GO:0050790(regulation of catalytic activity);GO:0048773(erythrophore differentiation);GO:0048678(response to axon injury);GO:0048666(neuron …	04068(FoxO signaling pathway);04146(Peroxisome);05016(Huntington's disease)	K04564	EC:1.15.1.1	superoxide dismutase 2, mitochondrial [Source:HGNC Symbol;Acc:HGNC:11180]	MSTRG.24605.1	MSTRG.24605	.	yes	novel	trans	NA	-32.94	0.954423
ENSSSCT00000031745	0	chr1	9475309	9487684	MSTRG.42	SOD2	yes	GO:0043209(myelin sheath);GO:0005743(mitochondrial inner membrane);GO:0005739(mitochondrion);GO:0055114(oxidation-reduction process);GO:0055093(response to hyperoxia);GO:0055072(iron ion homeostasis);GO:0051881(regulation of mitochondrial membrane potential);GO:0050790(regulation of catalytic activity);GO:0048773(erythrophore differentiation);GO:0048678(response to axon injury);GO:0048666(neuron …	04068(FoxO signaling pathway);04146(Peroxisome);05016(Huntington's disease)	K04564	EC:1.15.1.1	superoxide dismutase 2, mitochondrial [Source:HGNC Symbol;Acc:HGNC:11180]	MSTRG.24723.1	MSTRG.24723	.	yes	novel	trans	NA	-20.88	0.950909
ENSSSCT00000031745	0	chr1	9475309	9487684	MSTRG.42	SOD2	yes	GO:0043209(myelin sheath);GO:0005743(mitochondrial inner membrane);GO:0005739(mitochondrion);GO:0055114(oxidation-reduction process);GO:0055093(response to hyperoxia);GO:0055072(iron ion homeostasis);GO:0051881(regulation of mitochondrial membrane potential);GO:0050790(regulation of catalytic activity);GO:0048773(erythrophore differentiation);GO:0048678(response to axon injury);GO:0048666(neuron …	04068(FoxO signaling pathway);04146(Peroxisome);05016(Huntington's disease)	K04564	EC:1.15.1.1	superoxide dismutase 2, mitochondrial [Source:HGNC Symbol;Acc:HGNC:11180]	MSTRG.24799.1	MSTRG.24799	.	yes	novel	trans	NA	-42.89	0.989084
ENSSSCT00000031745	0	chr1	9475309	9487684	MSTRG.42	SOD2	yes	GO:0043209(myelin sheath);GO:0005743(mitochondrial inner membrane);GO:0005739(mitochondrion);GO:0055114(oxidation-reduction process);GO:0055093(response to hyperoxia);GO:0055072(iron ion homeostasis);GO:0051881(regulation of mitochondrial membrane potential);GO:0050790(regulation of catalytic activity);GO:0048773(erythrophore differentiation);GO:0048678(response to axon injury);GO:0048666(neuron …	04068(FoxO signaling pathway);04146(Peroxisome);05016(Huntington's disease)	K04564	EC:1.15.1.1	superoxide dismutase 2, mitochondrial [Source:HGNC Symbol;Acc:HGNC:11180]	MSTRG.25058.1	MSTRG.25058	.	yes	novel	trans	NA	-32.87	0.970169
ENSSSCT00000031745	0	chr1	9475309	9487684	MSTRG.42	SOD2	yes	GO:0043209(myelin sheath);GO:0005743(mitochondrial inner membrane);GO:0005739(mitochondrion);GO:0055114(oxidation-reduction process);GO:0055093(response to hyperoxia);GO:0055072(iron ion homeostasis);GO:0051881(regulation of mitochondrial membrane potential);GO:0050790(regulation of catalytic activity);GO:0048773(erythrophore differentiation);GO:0048678(response to axon injury);GO:0048666(neuron …	04068(FoxO signaling pathway);04146(Peroxisome);05016(Huntington's disease)	K04564	EC:1.15.1.1	superoxide dismutase 2, mitochondrial [Source:HGNC Symbol;Acc:HGNC:11180]	MSTRG.26559.1	MSTRG.26559	.	yes	novel	trans	NA	-40.94	0.99129
ENSSSCT00000031745	0	chr1	9475309	9487684	MSTRG.42	SOD2	yes	GO:0043209(myelin sheath);GO:0005743(mitochondrial inner membrane);GO:0005739(mitochondrion);GO:0055114(oxidation-reduction process);GO:0055093(response to hyperoxia);GO:0055072(iron ion homeostasis);GO:0051881(regulation of mitochondrial membrane potential);GO:0050790(regulation of catalytic activity);GO:0048773(erythrophore differentiation);GO:0048678(response to axon injury);GO:0048666(neuron …	04068(FoxO signaling pathway);04146(Peroxisome);05016(Huntington's disease)	K04564	EC:1.15.1.1	superoxide dismutase 2, mitochondrial [Source:HGNC Symbol;Acc:HGNC:11180]	MSTRG.27332.1	MSTRG.27332	.	yes	novel	trans	NA	-25.71	0.987614
ENSSSCT00000031745	0	chr1	9475309	9487684	MSTRG.42	SOD2	yes	GO:0043209(myelin sheath);GO:0005743(mitochondrial inner membrane);GO:0005739(mitochondrion);GO:0055114(oxidation-reduction process);GO:0055093(response to hyperoxia);GO:0055072(iron ion homeostasis);GO:0051881(regulation of mitochondrial membrane potential);GO:0050790(regulation of catalytic activity);GO:0048773(erythrophore differentiation);GO:0048678(response to axon injury);GO:0048666(neuron …	04068(FoxO signaling pathway);04146(Peroxisome);05016(Huntington's disease)	K04564	EC:1.15.1.1	superoxide dismutase 2, mitochondrial [Source:HGNC Symbol;Acc:HGNC:11180]	MSTRG.27711.1	MSTRG.27711	.	yes	novel	trans	NA	-49.12	-0.987839
ENSSSCT00000031745	0	chr1	9475309	9487684	MSTRG.42	SOD2	yes	GO:0043209(myelin sheath);GO:0005743(mitochondrial inner membrane);GO:0005739(mitochondrion);GO:0055114(oxidation-reduction process);GO:0055093(response to hyperoxia);GO:0055072(iron ion homeostasis);GO:0051881(regulation of mitochondrial membrane potential);GO:0050790(regulation of catalytic activity);GO:0048773(erythrophore differentiation);GO:0048678(response to axon injury);GO:0048666(neuron …	04068(FoxO signaling pathway);04146(Peroxisome);05016(Huntington's disease)	K04564	EC:1.15.1.1	superoxide dismutase 2, mitochondrial [Source:HGNC Symbol;Acc:HGNC:11180]	MSTRG.28025.1	MSTRG.28025	.	yes	novel	trans	NA	-20.49	0.978574
ENSSSCT00000031745	0	chr1	9475309	9487684	MSTRG.42	SOD2	yes	GO:0043209(myelin sheath);GO:0005743(mitochondrial inner membrane);GO:0005739(mitochondrion);GO:0055114(oxidation-reduction process);GO:0055093(response to hyperoxia);GO:0055072(iron ion homeostasis);GO:0051881(regulation of mitochondrial membrane potential);GO:0050790(regulation of catalytic activity);GO:0048773(erythrophore differentiation);GO:0048678(response to axon injury);GO:0048666(neuron …	04068(FoxO signaling pathway);04146(Peroxisome);05016(Huntington's disease)	K04564	EC:1.15.1.1	superoxide dismutase 2, mitochondrial [Source:HGNC Symbol;Acc:HGNC:11180]	MSTRG.28708.1	MSTRG.28708	.	yes	novel	trans	NA	-34.41	0.994823
ENSSSCT00000031745	0	chr1	9475309	9487684	MSTRG.42	SOD2	yes	GO:0043209(myelin sheath);GO:0005743(mitochondrial inner membrane);GO:0005739(mitochondrion);GO:0055114(oxidation-reduction process);GO:0055093(response to hyperoxia);GO:0055072(iron ion homeostasis);GO:0051881(regulation of mitochondrial membrane potential);GO:0050790(regulation of catalytic activity);GO:0048773(erythrophore differentiation);GO:0048678(response to axon injury);GO:0048666(neuron …	04068(FoxO signaling pathway);04146(Peroxisome);05016(Huntington's disease)	K04564	EC:1.15.1.1	superoxide dismutase 2, mitochondrial [Source:HGNC Symbol;Acc:HGNC:11180]	MSTRG.28976.1	MSTRG.28976	.	yes	novel	trans	NA	-50.28	0.973989
ENSSSCT00000031745	0	chr1	9475309	9487684	MSTRG.42	SOD2	yes	GO:0043209(myelin sheath);GO:0005743(mitochondrial inner membrane);GO:0005739(mitochondrion);GO:0055114(oxidation-reduction process);GO:0055093(response to hyperoxia);GO:0055072(iron ion homeostasis);GO:0051881(regulation of mitochondrial membrane potential);GO:0050790(regulation of catalytic activity);GO:0048773(erythrophore differentiation);GO:0048678(response to axon injury);GO:0048666(neuron …	04068(FoxO signaling pathway);04146(Peroxisome);05016(Huntington's disease)	K04564	EC:1.15.1.1	superoxide dismutase 2, mitochondrial [Source:HGNC Symbol;Acc:HGNC:11180]	MSTRG.30173.1	MSTRG.30173	CXCL2	yes	novel	trans	NA	-44.21	0.961737
ENSSSCT00000031745	0	chr1	9475309	9487684	MSTRG.42	SOD2	yes	GO:0043209(myelin sheath);GO:0005743(mitochondrial inner membrane);GO:0005739(mitochondrion);GO:0055114(oxidation-reduction process);GO:0055093(response to hyperoxia);GO:0055072(iron ion homeostasis);GO:0051881(regulation of mitochondrial membrane potential);GO:0050790(regulation of catalytic activity);GO:0048773(erythrophore differentiation);GO:0048678(response to axon injury);GO:0048666(neuron …	04068(FoxO signaling pathway);04146(Peroxisome);05016(Huntington's disease)	K04564	EC:1.15.1.1	superoxide dismutase 2, mitochondrial [Source:HGNC Symbol;Acc:HGNC:11180]	MSTRG.30360.1	MSTRG.30360	.	yes	novel	trans	NA	-24.26	0.992804
ENSSSCT00000031745	0	chr1	9475309	9487684	MSTRG.42	SOD2	yes	GO:0043209(myelin sheath);GO:0005743(mitochondrial inner membrane);GO:0005739(mitochondrion);GO:0055114(oxidation-reduction process);GO:0055093(response to hyperoxia);GO:0055072(iron ion homeostasis);GO:0051881(regulation of mitochondrial membrane potential);GO:0050790(regulation of catalytic activity);GO:0048773(erythrophore differentiation);GO:0048678(response to axon injury);GO:0048666(neuron …	04068(FoxO signaling pathway);04146(Peroxisome);05016(Huntington's disease)	K04564	EC:1.15.1.1	superoxide dismutase 2, mitochondrial [Source:HGNC Symbol;Acc:HGNC:11180]	MSTRG.30732.1	MSTRG.30732	.	yes	novel	trans	NA	-34.18	0.969683
ENSSSCT00000031745	0	chr1	9475309	9487684	MSTRG.42	SOD2	yes	GO:0043209(myelin sheath);GO:0005743(mitochondrial inner membrane);GO:0005739(mitochondrion);GO:0055114(oxidation-reduction process);GO:0055093(response to hyperoxia);GO:0055072(iron ion homeostasis);GO:0051881(regulation of mitochondrial membrane potential);GO:0050790(regulation of catalytic activity);GO:0048773(erythrophore differentiation);GO:0048678(response to axon injury);GO:0048666(neuron …	04068(FoxO signaling pathway);04146(Peroxisome);05016(Huntington's disease)	K04564	EC:1.15.1.1	superoxide dismutase 2, mitochondrial [Source:HGNC Symbol;Acc:HGNC:11180]	MSTRG.31992.1	MSTRG.31992	.	yes	novel	trans	NA	-22.28	0.985294
ENSSSCT00000004560	0	chr1	23480022	23510485	MSTRG.217	STX11	yes	GO:0031201(SNARE complex);GO:0016021(integral component of membrane);GO:0016020(membrane);GO:0008021(synaptic vesicle);GO:0005886(plasma membrane);GO:0005794(Golgi apparatus);GO:0048278(vesicle docking);GO:0031629(synaptic vesicle fusion to presynaptic active zone membrane);GO:0016192(vesicle-mediated transport);GO:0006886(intracellular protein transport);GO:0005484(SNAP receptor activity);GO:000…	04130(SNARE interactions in vesicular transport)	K08487	NA	syntaxin 11 [Source:HGNC Symbol;Acc:HGNC:11429]	MSTRG.5870.1	MSTRG.5870	.	yes	novel	trans	NA	-54.45	0.993265
ENSSSCT00000004560	0	chr1	23480022	23510485	MSTRG.217	STX11	yes	GO:0031201(SNARE complex);GO:0016021(integral component of membrane);GO:0016020(membrane);GO:0008021(synaptic vesicle);GO:0005886(plasma membrane);GO:0005794(Golgi apparatus);GO:0048278(vesicle docking);GO:0031629(synaptic vesicle fusion to presynaptic active zone membrane);GO:0016192(vesicle-mediated transport);GO:0006886(intracellular protein transport);GO:0005484(SNAP receptor activity);GO:000…	04130(SNARE interactions in vesicular transport)	K08487	NA	syntaxin 11 [Source:HGNC Symbol;Acc:HGNC:11429]	MSTRG.8811.1	MSTRG.8811	.	yes	novel	trans	NA	-38.83	0.958617
ENSSSCT00000004560	0	chr1	23480022	23510485	MSTRG.217	STX11	yes	GO:0031201(SNARE complex);GO:0016021(integral component of membrane);GO:0016020(membrane);GO:0008021(synaptic vesicle);GO:0005886(plasma membrane);GO:0005794(Golgi apparatus);GO:0048278(vesicle docking);GO:0031629(synaptic vesicle fusion to presynaptic active zone membrane);GO:0016192(vesicle-mediated transport);GO:0006886(intracellular protein transport);GO:0005484(SNAP receptor activity);GO:000…	04130(SNARE interactions in vesicular transport)	K08487	NA	syntaxin 11 [Source:HGNC Symbol;Acc:HGNC:11429]	MSTRG.9920.1	MSTRG.9920	.	yes	novel	trans	NA	-41.55	0.995725
ENSSSCT00000004560	0	chr1	23480022	23510485	MSTRG.217	STX11	yes	GO:0031201(SNARE complex);GO:0016021(integral component of membrane);GO:0016020(membrane);GO:0008021(synaptic vesicle);GO:0005886(plasma membrane);GO:0005794(Golgi apparatus);GO:0048278(vesicle docking);GO:0031629(synaptic vesicle fusion to presynaptic active zone membrane);GO:0016192(vesicle-mediated transport);GO:0006886(intracellular protein transport);GO:0005484(SNAP receptor activity);GO:000…	04130(SNARE interactions in vesicular transport)	K08487	NA	syntaxin 11 [Source:HGNC Symbol;Acc:HGNC:11429]	MSTRG.11550.1	MSTRG.11550	.	yes	novel	trans	NA	-36.28	0.974117
ENSSSCT00000004560	0	chr1	23480022	23510485	MSTRG.217	STX11	yes	GO:0031201(SNARE complex);GO:0016021(integral component of membrane);GO:0016020(membrane);GO:0008021(synaptic vesicle);GO:0005886(plasma membrane);GO:0005794(Golgi apparatus);GO:0048278(vesicle docking);GO:0031629(synaptic vesicle fusion to presynaptic active zone membrane);GO:0016192(vesicle-mediated transport);GO:0006886(intracellular protein transport);GO:0005484(SNAP receptor activity);GO:000…	04130(SNARE interactions in vesicular transport)	K08487	NA	syntaxin 11 [Source:HGNC Symbol;Acc:HGNC:11429]	MSTRG.12943.1	MSTRG.12943	.	yes	novel	trans	NA	-32.16	0.984678
ENSSSCT00000004560	0	chr1	23480022	23510485	MSTRG.217	STX11	yes	GO:0031201(SNARE complex);GO:0016021(integral component of membrane);GO:0016020(membrane);GO:0008021(synaptic vesicle);GO:0005886(plasma membrane);GO:0005794(Golgi apparatus);GO:0048278(vesicle docking);GO:0031629(synaptic vesicle fusion to presynaptic active zone membrane);GO:0016192(vesicle-mediated transport);GO:0006886(intracellular protein transport);GO:0005484(SNAP receptor activity);GO:000…	04130(SNARE interactions in vesicular transport)	K08487	NA	syntaxin 11 [Source:HGNC Symbol;Acc:HGNC:11429]	MSTRG.16577.1	MSTRG.16577	.	yes	novel	trans	NA	-56.82	0.984591
ENSSSCT00000004560	0	chr1	23480022	23510485	MSTRG.217	STX11	yes	GO:0031201(SNARE complex);GO:0016021(integral component of membrane);GO:0016020(membrane);GO:0008021(synaptic vesicle);GO:0005886(plasma membrane);GO:0005794(Golgi apparatus);GO:0048278(vesicle docking);GO:0031629(synaptic vesicle fusion to presynaptic active zone membrane);GO:0016192(vesicle-mediated transport);GO:0006886(intracellular protein transport);GO:0005484(SNAP receptor activity);GO:000…	04130(SNARE interactions in vesicular transport)	K08487	NA	syntaxin 11 [Source:HGNC Symbol;Acc:HGNC:11429]	MSTRG.16579.1	MSTRG.16579	.	yes	novel	trans	NA	-36.15	0.986375
ENSSSCT00000004560	0	chr1	23480022	23510485	MSTRG.217	STX11	yes	GO:0031201(SNARE complex);GO:0016021(integral component of membrane);GO:0016020(membrane);GO:0008021(synaptic vesicle);GO:0005886(plasma membrane);GO:0005794(Golgi apparatus);GO:0048278(vesicle docking);GO:0031629(synaptic vesicle fusion to presynaptic active zone membrane);GO:0016192(vesicle-mediated transport);GO:0006886(intracellular protein transport);GO:0005484(SNAP receptor activity);GO:000…	04130(SNARE interactions in vesicular transport)	K08487	NA	syntaxin 11 [Source:HGNC Symbol;Acc:HGNC:11429]	MSTRG.16579.2	MSTRG.16579	.	yes	novel	trans	NA	-36.63	0.97808
ENSSSCT00000004560	0	chr1	23480022	23510485	MSTRG.217	STX11	yes	GO:0031201(SNARE complex);GO:0016021(integral component of membrane);GO:0016020(membrane);GO:0008021(synaptic vesicle);GO:0005886(plasma membrane);GO:0005794(Golgi apparatus);GO:0048278(vesicle docking);GO:0031629(synaptic vesicle fusion to presynaptic active zone membrane);GO:0016192(vesicle-mediated transport);GO:0006886(intracellular protein transport);GO:0005484(SNAP receptor activity);GO:000…	04130(SNARE interactions in vesicular transport)	K08487	NA	syntaxin 11 [Source:HGNC Symbol;Acc:HGNC:11429]	MSTRG.19799.1	MSTRG.19799	.	yes	novel	trans	NA	-37.51	0.955302
ENSSSCT00000004560	0	chr1	23480022	23510485	MSTRG.217	STX11	yes	GO:0031201(SNARE complex);GO:0016021(integral component of membrane);GO:0016020(membrane);GO:0008021(synaptic vesicle);GO:0005886(plasma membrane);GO:0005794(Golgi apparatus);GO:0048278(vesicle docking);GO:0031629(synaptic vesicle fusion to presynaptic active zone membrane);GO:0016192(vesicle-mediated transport);GO:0006886(intracellular protein transport);GO:0005484(SNAP receptor activity);GO:000…	04130(SNARE interactions in vesicular transport)	K08487	NA	syntaxin 11 [Source:HGNC Symbol;Acc:HGNC:11429]	MSTRG.20222.1	MSTRG.20222	.	yes	novel	trans	NA	-43.27	0.97333
ENSSSCT00000004560	0	chr1	23480022	23510485	MSTRG.217	STX11	yes	GO:0031201(SNARE complex);GO:0016021(integral component of membrane);GO:0016020(membrane);GO:0008021(synaptic vesicle);GO:0005886(plasma membrane);GO:0005794(Golgi apparatus);GO:0048278(vesicle docking);GO:0031629(synaptic vesicle fusion to presynaptic active zone membrane);GO:0016192(vesicle-mediated transport);GO:0006886(intracellular protein transport);GO:0005484(SNAP receptor activity);GO:000…	04130(SNARE interactions in vesicular transport)	K08487	NA	syntaxin 11 [Source:HGNC Symbol;Acc:HGNC:11429]	MSTRG.21596.1	MSTRG.21596	.	yes	novel	trans	NA	-54.04	0.96124
ENSSSCT00000004560	0	chr1	23480022	23510485	MSTRG.217	STX11	yes	GO:0031201(SNARE complex);GO:0016021(integral component of membrane);GO:0016020(membrane);GO:0008021(synaptic vesicle);GO:0005886(plasma membrane);GO:0005794(Golgi apparatus);GO:0048278(vesicle docking);GO:0031629(synaptic vesicle fusion to presynaptic active zone membrane);GO:0016192(vesicle-mediated transport);GO:0006886(intracellular protein transport);GO:0005484(SNAP receptor activity);GO:000…	04130(SNARE interactions in vesicular transport)	K08487	NA	syntaxin 11 [Source:HGNC Symbol;Acc:HGNC:11429]	MSTRG.23105.1	MSTRG.23105	.	yes	novel	trans	NA	-45.69	0.96671
ENSSSCT00000004560	0	chr1	23480022	23510485	MSTRG.217	STX11	yes	GO:0031201(SNARE complex);GO:0016021(integral component of membrane);GO:0016020(membrane);GO:0008021(synaptic vesicle);GO:0005886(plasma membrane);GO:0005794(Golgi apparatus);GO:0048278(vesicle docking);GO:0031629(synaptic vesicle fusion to presynaptic active zone membrane);GO:0016192(vesicle-mediated transport);GO:0006886(intracellular protein transport);GO:0005484(SNAP receptor activity);GO:000…	04130(SNARE interactions in vesicular transport)	K08487	NA	syntaxin 11 [Source:HGNC Symbol;Acc:HGNC:11429]	MSTRG.24330.1	MSTRG.24330	.	yes	novel	trans	NA	-47.86	0.9817
ENSSSCT00000004560	0	chr1	23480022	23510485	MSTRG.217	STX11	yes	GO:0031201(SNARE complex);GO:0016021(integral component of membrane);GO:0016020(membrane);GO:0008021(synaptic vesicle);GO:0005886(plasma membrane);GO:0005794(Golgi apparatus);GO:0048278(vesicle docking);GO:0031629(synaptic vesicle fusion to presynaptic active zone membrane);GO:0016192(vesicle-mediated transport);GO:0006886(intracellular protein transport);GO:0005484(SNAP receptor activity);GO:000…	04130(SNARE interactions in vesicular transport)	K08487	NA	syntaxin 11 [Source:HGNC Symbol;Acc:HGNC:11429]	MSTRG.24654.1	MSTRG.24654	.	yes	novel	trans	NA	-38.69	0.972293
ENSSSCT00000004560	0	chr1	23480022	23510485	MSTRG.217	STX11	yes	GO:0031201(SNARE complex);GO:0016021(integral component of membrane);GO:0016020(membrane);GO:0008021(synaptic vesicle);GO:0005886(plasma membrane);GO:0005794(Golgi apparatus);GO:0048278(vesicle docking);GO:0031629(synaptic vesicle fusion to presynaptic active zone membrane);GO:0016192(vesicle-mediated transport);GO:0006886(intracellular protein transport);GO:0005484(SNAP receptor activity);GO:000…	04130(SNARE interactions in vesicular transport)	K08487	NA	syntaxin 11 [Source:HGNC Symbol;Acc:HGNC:11429]	MSTRG.25058.1	MSTRG.25058	.	yes	novel	trans	NA	-19.09	0.971828
ENSSSCT00000004560	0	chr1	23480022	23510485	MSTRG.217	STX11	yes	GO:0031201(SNARE complex);GO:0016021(integral component of membrane);GO:0016020(membrane);GO:0008021(synaptic vesicle);GO:0005886(plasma membrane);GO:0005794(Golgi apparatus);GO:0048278(vesicle docking);GO:0031629(synaptic vesicle fusion to presynaptic active zone membrane);GO:0016192(vesicle-mediated transport);GO:0006886(intracellular protein transport);GO:0005484(SNAP receptor activity);GO:000…	04130(SNARE interactions in vesicular transport)	K08487	NA	syntaxin 11 [Source:HGNC Symbol;Acc:HGNC:11429]	MSTRG.27099.1	MSTRG.27099	GIPC2	yes	novel	trans	NA	-48.69	0.975451
ENSSSCT00000004560	0	chr1	23480022	23510485	MSTRG.217	STX11	yes	GO:0031201(SNARE complex);GO:0016021(integral component of membrane);GO:0016020(membrane);GO:0008021(synaptic vesicle);GO:0005886(plasma membrane);GO:0005794(Golgi apparatus);GO:0048278(vesicle docking);GO:0031629(synaptic vesicle fusion to presynaptic active zone membrane);GO:0016192(vesicle-mediated transport);GO:0006886(intracellular protein transport);GO:0005484(SNAP receptor activity);GO:000…	04130(SNARE interactions in vesicular transport)	K08487	NA	syntaxin 11 [Source:HGNC Symbol;Acc:HGNC:11429]	MSTRG.28322.1	MSTRG.28322	ENSSSCG00000001692	yes	novel	trans	NA	-49.89	0.981917
ENSSSCT00000004580	0	chr1	28516798	28531132	MSTRG.288	HECA	yes	GO:0016020(membrane);GO:0005737(cytoplasm);GO:0005634(nucleus);GO:0045930(negative regulation of mitotic cell cycle)	NA	NA	NA	hdc homolog, cell cycle regulator [Source:HGNC Symbol;Acc:HGNC:21041]	MSTRG.4592.1	MSTRG.4592	.	yes	novel	trans	NA	-52.33	0.985824
ENSSSCT00000004580	0	chr1	28516798	28531132	MSTRG.288	HECA	yes	GO:0016020(membrane);GO:0005737(cytoplasm);GO:0005634(nucleus);GO:0045930(negative regulation of mitotic cell cycle)	NA	NA	NA	hdc homolog, cell cycle regulator [Source:HGNC Symbol;Acc:HGNC:21041]	MSTRG.4625.3	MSTRG.4625	.	yes	novel	trans	NA	-34.98	0.984086
ENSSSCT00000004580	0	chr1	28516798	28531132	MSTRG.288	HECA	yes	GO:0016020(membrane);GO:0005737(cytoplasm);GO:0005634(nucleus);GO:0045930(negative regulation of mitotic cell cycle)	NA	NA	NA	hdc homolog, cell cycle regulator [Source:HGNC Symbol;Acc:HGNC:21041]	MSTRG.5886.1	MSTRG.5886	.	yes	novel	trans	NA	-48.39	0.957982
ENSSSCT00000004580	0	chr1	28516798	28531132	MSTRG.288	HECA	yes	GO:0016020(membrane);GO:0005737(cytoplasm);GO:0005634(nucleus);GO:0045930(negative regulation of mitotic cell cycle)	NA	NA	NA	hdc homolog, cell cycle regulator [Source:HGNC Symbol;Acc:HGNC:21041]	MSTRG.5901.1	MSTRG.5901	.	yes	novel	trans	NA	-44.18	0.954628
ENSSSCT00000004580	0	chr1	28516798	28531132	MSTRG.288	HECA	yes	GO:0016020(membrane);GO:0005737(cytoplasm);GO:0005634(nucleus);GO:0045930(negative regulation of mitotic cell cycle)	NA	NA	NA	hdc homolog, cell cycle regulator [Source:HGNC Symbol;Acc:HGNC:21041]	MSTRG.8436.1	MSTRG.8436	.	yes	novel	trans	NA	-36.06	0.998736
ENSSSCT00000004580	0	chr1	28516798	28531132	MSTRG.288	HECA	yes	GO:0016020(membrane);GO:0005737(cytoplasm);GO:0005634(nucleus);GO:0045930(negative regulation of mitotic cell cycle)	NA	NA	NA	hdc homolog, cell cycle regulator [Source:HGNC Symbol;Acc:HGNC:21041]	MSTRG.8811.1	MSTRG.8811	.	yes	novel	trans	NA	-31.08	0.971
ENSSSCT00000004580	0	chr1	28516798	28531132	MSTRG.288	HECA	yes	GO:0016020(membrane);GO:0005737(cytoplasm);GO:0005634(nucleus);GO:0045930(negative regulation of mitotic cell cycle)	NA	NA	NA	hdc homolog, cell cycle regulator [Source:HGNC Symbol;Acc:HGNC:21041]	MSTRG.10446.1	MSTRG.10446	.	yes	novel	trans	NA	-28.73	0.968618
ENSSSCT00000004580	0	chr1	28516798	28531132	MSTRG.288	HECA	yes	GO:0016020(membrane);GO:0005737(cytoplasm);GO:0005634(nucleus);GO:0045930(negative regulation of mitotic cell cycle)	NA	NA	NA	hdc homolog, cell cycle regulator [Source:HGNC Symbol;Acc:HGNC:21041]	MSTRG.14046.1	MSTRG.14046	.	yes	novel	trans	NA	-38.87	0.960182
ENSSSCT00000004580	0	chr1	28516798	28531132	MSTRG.288	HECA	yes	GO:0016020(membrane);GO:0005737(cytoplasm);GO:0005634(nucleus);GO:0045930(negative regulation of mitotic cell cycle)	NA	NA	NA	hdc homolog, cell cycle regulator [Source:HGNC Symbol;Acc:HGNC:21041]	MSTRG.15022.1	MSTRG.15022	CEP250	yes	novel	trans	NA	-24.25	-0.961002
ENSSSCT00000004580	0	chr1	28516798	28531132	MSTRG.288	HECA	yes	GO:0016020(membrane);GO:0005737(cytoplasm);GO:0005634(nucleus);GO:0045930(negative regulation of mitotic cell cycle)	NA	NA	NA	hdc homolog, cell cycle regulator [Source:HGNC Symbol;Acc:HGNC:21041]	MSTRG.19762.1	MSTRG.19762	.	yes	novel	trans	NA	-54.68	0.994998
ENSSSCT00000004580	0	chr1	28516798	28531132	MSTRG.288	HECA	yes	GO:0016020(membrane);GO:0005737(cytoplasm);GO:0005634(nucleus);GO:0045930(negative regulation of mitotic cell cycle)	NA	NA	NA	hdc homolog, cell cycle regulator [Source:HGNC Symbol;Acc:HGNC:21041]	MSTRG.21596.1	MSTRG.21596	.	yes	novel	trans	NA	-34.87	0.973543
ENSSSCT00000004580	0	chr1	28516798	28531132	MSTRG.288	HECA	yes	GO:0016020(membrane);GO:0005737(cytoplasm);GO:0005634(nucleus);GO:0045930(negative regulation of mitotic cell cycle)	NA	NA	NA	hdc homolog, cell cycle regulator [Source:HGNC Symbol;Acc:HGNC:21041]	MSTRG.21860.1	MSTRG.21860	.	yes	novel	trans	NA	-48.56	0.968324
ENSSSCT00000004580	0	chr1	28516798	28531132	MSTRG.288	HECA	yes	GO:0016020(membrane);GO:0005737(cytoplasm);GO:0005634(nucleus);GO:0045930(negative regulation of mitotic cell cycle)	NA	NA	NA	hdc homolog, cell cycle regulator [Source:HGNC Symbol;Acc:HGNC:21041]	MSTRG.22657.1	MSTRG.22657	IGSF3	yes	novel	trans	NA	-32.20	0.953034
ENSSSCT00000004580	0	chr1	28516798	28531132	MSTRG.288	HECA	yes	GO:0016020(membrane);GO:0005737(cytoplasm);GO:0005634(nucleus);GO:0045930(negative regulation of mitotic cell cycle)	NA	NA	NA	hdc homolog, cell cycle regulator [Source:HGNC Symbol;Acc:HGNC:21041]	MSTRG.23105.1	MSTRG.23105	.	yes	novel	trans	NA	-44.74	0.962428
ENSSSCT00000004580	0	chr1	28516798	28531132	MSTRG.288	HECA	yes	GO:0016020(membrane);GO:0005737(cytoplasm);GO:0005634(nucleus);GO:0045930(negative regulation of mitotic cell cycle)	NA	NA	NA	hdc homolog, cell cycle regulator [Source:HGNC Symbol;Acc:HGNC:21041]	MSTRG.24277.1	MSTRG.24277	.	yes	novel	trans	NA	-19.21	0.957611
ENSSSCT00000004580	0	chr1	28516798	28531132	MSTRG.288	HECA	yes	GO:0016020(membrane);GO:0005737(cytoplasm);GO:0005634(nucleus);GO:0045930(negative regulation of mitotic cell cycle)	NA	NA	NA	hdc homolog, cell cycle regulator [Source:HGNC Symbol;Acc:HGNC:21041]	MSTRG.24765.1	MSTRG.24765	ACSS3	yes	novel	trans	NA	-45.65	0.972553
ENSSSCT00000004580	0	chr1	28516798	28531132	MSTRG.288	HECA	yes	GO:0016020(membrane);GO:0005737(cytoplasm);GO:0005634(nucleus);GO:0045930(negative regulation of mitotic cell cycle)	NA	NA	NA	hdc homolog, cell cycle regulator [Source:HGNC Symbol;Acc:HGNC:21041]	MSTRG.26559.1	MSTRG.26559	.	yes	novel	trans	NA	-34.85	0.956541
ENSSSCT00000004580	0	chr1	28516798	28531132	MSTRG.288	HECA	yes	GO:0016020(membrane);GO:0005737(cytoplasm);GO:0005634(nucleus);GO:0045930(negative regulation of mitotic cell cycle)	NA	NA	NA	hdc homolog, cell cycle regulator [Source:HGNC Symbol;Acc:HGNC:21041]	MSTRG.26918.1	MSTRG.26918	.	yes	novel	trans	NA	-51.66	0.963718
ENSSSCT00000004580	0	chr1	28516798	28531132	MSTRG.288	HECA	yes	GO:0016020(membrane);GO:0005737(cytoplasm);GO:0005634(nucleus);GO:0045930(negative regulation of mitotic cell cycle)	NA	NA	NA	hdc homolog, cell cycle regulator [Source:HGNC Symbol;Acc:HGNC:21041]	MSTRG.27332.1	MSTRG.27332	.	yes	novel	trans	NA	-18.29	0.989405
ENSSSCT00000004580	0	chr1	28516798	28531132	MSTRG.288	HECA	yes	GO:0016020(membrane);GO:0005737(cytoplasm);GO:0005634(nucleus);GO:0045930(negative regulation of mitotic cell cycle)	NA	NA	NA	hdc homolog, cell cycle regulator [Source:HGNC Symbol;Acc:HGNC:21041]	MSTRG.27711.1	MSTRG.27711	.	yes	novel	trans	NA	-42.24	-0.953988
ENSSSCT00000004580	0	chr1	28516798	28531132	MSTRG.288	HECA	yes	GO:0016020(membrane);GO:0005737(cytoplasm);GO:0005634(nucleus);GO:0045930(negative regulation of mitotic cell cycle)	NA	NA	NA	hdc homolog, cell cycle regulator [Source:HGNC Symbol;Acc:HGNC:21041]	MSTRG.28708.1	MSTRG.28708	.	yes	novel	trans	NA	-35.86	0.985429
ENSSSCT00000004580	0	chr1	28516798	28531132	MSTRG.288	HECA	yes	GO:0016020(membrane);GO:0005737(cytoplasm);GO:0005634(nucleus);GO:0045930(negative regulation of mitotic cell cycle)	NA	NA	NA	hdc homolog, cell cycle regulator [Source:HGNC Symbol;Acc:HGNC:21041]	MSTRG.28979.5	MSTRG.28979	SNORA79	yes	novel	trans	NA	-46.66	0.965805
ENSSSCT00000004580	0	chr1	28516798	28531132	MSTRG.288	HECA	yes	GO:0016020(membrane);GO:0005737(cytoplasm);GO:0005634(nucleus);GO:0045930(negative regulation of mitotic cell cycle)	NA	NA	NA	hdc homolog, cell cycle regulator [Source:HGNC Symbol;Acc:HGNC:21041]	MSTRG.30173.1	MSTRG.30173	CXCL2	yes	novel	trans	NA	-45.76	0.965339
ENSSSCT00000004580	0	chr1	28516798	28531132	MSTRG.288	HECA	yes	GO:0016020(membrane);GO:0005737(cytoplasm);GO:0005634(nucleus);GO:0045930(negative regulation of mitotic cell cycle)	NA	NA	NA	hdc homolog, cell cycle regulator [Source:HGNC Symbol;Acc:HGNC:21041]	MSTRG.31692.1	MSTRG.31692	.	yes	novel	trans	NA	-44.44	0.950926
ENSSSCT00000004580	0	chr1	28516798	28531132	MSTRG.288	HECA	yes	GO:0016020(membrane);GO:0005737(cytoplasm);GO:0005634(nucleus);GO:0045930(negative regulation of mitotic cell cycle)	NA	NA	NA	hdc homolog, cell cycle regulator [Source:HGNC Symbol;Acc:HGNC:21041]	MSTRG.31992.1	MSTRG.31992	.	yes	novel	trans	NA	-38.59	0.964398
ENSSSCT00000034426	0	chr1	29825892	29841626	MSTRG.319	TNFAIP3	yes	GO:0005737(cytoplasm);GO:0005634(nucleus);GO:0071947(protein deubiquitination involved in ubiquitin-dependent protein catabolic process);GO:0071108(protein K48-linked deubiquitination);GO:0070536(protein K63-linked deubiquitination);GO:0050727(regulation of inflammatory response);GO:0045088(regulation of innate immune response);GO:0043124(negative regulation of I-kappaB kinase/NF-kappaB signaling…	04064(NF-kappa B signaling pathway);04668(TNF signaling pathway);04621(NOD-like receptor signaling pathway);05162(Measles);05169(Epstein-Barr virus infection)	K11859	EC:3.4.19.12	TNF alpha induced protein 3 [Source:HGNC Symbol;Acc:HGNC:11896]	MSTRG.8436.1	MSTRG.8436	.	yes	novel	trans	NA	-26.68	0.984141
ENSSSCT00000034426	0	chr1	29825892	29841626	MSTRG.319	TNFAIP3	yes	GO:0005737(cytoplasm);GO:0005634(nucleus);GO:0071947(protein deubiquitination involved in ubiquitin-dependent protein catabolic process);GO:0071108(protein K48-linked deubiquitination);GO:0070536(protein K63-linked deubiquitination);GO:0050727(regulation of inflammatory response);GO:0045088(regulation of innate immune response);GO:0043124(negative regulation of I-kappaB kinase/NF-kappaB signaling…	04064(NF-kappa B signaling pathway);04668(TNF signaling pathway);04621(NOD-like receptor signaling pathway);05162(Measles);05169(Epstein-Barr virus infection)	K11859	EC:3.4.19.12	TNF alpha induced protein 3 [Source:HGNC Symbol;Acc:HGNC:11896]	MSTRG.8811.1	MSTRG.8811	.	yes	novel	trans	NA	-54.07	0.954836
ENSSSCT00000034426	0	chr1	29825892	29841626	MSTRG.319	TNFAIP3	yes	GO:0005737(cytoplasm);GO:0005634(nucleus);GO:0071947(protein deubiquitination involved in ubiquitin-dependent protein catabolic process);GO:0071108(protein K48-linked deubiquitination);GO:0070536(protein K63-linked deubiquitination);GO:0050727(regulation of inflammatory response);GO:0045088(regulation of innate immune response);GO:0043124(negative regulation of I-kappaB kinase/NF-kappaB signaling…	04064(NF-kappa B signaling pathway);04668(TNF signaling pathway);04621(NOD-like receptor signaling pathway);05162(Measles);05169(Epstein-Barr virus infection)	K11859	EC:3.4.19.12	TNF alpha induced protein 3 [Source:HGNC Symbol;Acc:HGNC:11896]	MSTRG.10446.1	MSTRG.10446	.	yes	novel	trans	NA	-38.14	0.955181
ENSSSCT00000034426	0	chr1	29825892	29841626	MSTRG.319	TNFAIP3	yes	GO:0005737(cytoplasm);GO:0005634(nucleus);GO:0071947(protein deubiquitination involved in ubiquitin-dependent protein catabolic process);GO:0071108(protein K48-linked deubiquitination);GO:0070536(protein K63-linked deubiquitination);GO:0050727(regulation of inflammatory response);GO:0045088(regulation of innate immune response);GO:0043124(negative regulation of I-kappaB kinase/NF-kappaB signaling…	04064(NF-kappa B signaling pathway);04668(TNF signaling pathway);04621(NOD-like receptor signaling pathway);05162(Measles);05169(Epstein-Barr virus infection)	K11859	EC:3.4.19.12	TNF alpha induced protein 3 [Source:HGNC Symbol;Acc:HGNC:11896]	MSTRG.19762.1	MSTRG.19762	.	yes	novel	trans	NA	-39.01	0.959411
ENSSSCT00000034426	0	chr1	29825892	29841626	MSTRG.319	TNFAIP3	yes	GO:0005737(cytoplasm);GO:0005634(nucleus);GO:0071947(protein deubiquitination involved in ubiquitin-dependent protein catabolic process);GO:0071108(protein K48-linked deubiquitination);GO:0070536(protein K63-linked deubiquitination);GO:0050727(regulation of inflammatory response);GO:0045088(regulation of innate immune response);GO:0043124(negative regulation of I-kappaB kinase/NF-kappaB signaling…	04064(NF-kappa B signaling pathway);04668(TNF signaling pathway);04621(NOD-like receptor signaling pathway);05162(Measles);05169(Epstein-Barr virus infection)	K11859	EC:3.4.19.12	TNF alpha induced protein 3 [Source:HGNC Symbol;Acc:HGNC:11896]	MSTRG.26918.1	MSTRG.26918	.	yes	novel	trans	NA	-22.81	0.991274
ENSSSCT00000027554	0	chr1	35463102	35466461	MSTRG.356	ARG1	yes	GO:0046872(metal ion binding);GO:0016813(hydrolase activity, acting on carbon-nitrogen (but not peptide) bonds, in linear amidines);GO:0016787(hydrolase activity)	NA	K01476	EC:3.5.3.1	NA	MSTRG.4146.1	MSTRG.4146	.	yes	novel	trans	NA	-35.97	0.955883
ENSSSCT00000027554	0	chr1	35463102	35466461	MSTRG.356	ARG1	yes	GO:0046872(metal ion binding);GO:0016813(hydrolase activity, acting on carbon-nitrogen (but not peptide) bonds, in linear amidines);GO:0016787(hydrolase activity)	NA	K01476	EC:3.5.3.1	NA	MSTRG.4592.1	MSTRG.4592	.	yes	novel	trans	NA	-43.34	0.951655
ENSSSCT00000027554	0	chr1	35463102	35466461	MSTRG.356	ARG1	yes	GO:0046872(metal ion binding);GO:0016813(hydrolase activity, acting on carbon-nitrogen (but not peptide) bonds, in linear amidines);GO:0016787(hydrolase activity)	NA	K01476	EC:3.5.3.1	NA	MSTRG.5643.1	MSTRG.5643	MYL4	yes	novel	trans	NA	-41.30	-0.9508
ENSSSCT00000027554	0	chr1	35463102	35466461	MSTRG.356	ARG1	yes	GO:0046872(metal ion binding);GO:0016813(hydrolase activity, acting on carbon-nitrogen (but not peptide) bonds, in linear amidines);GO:0016787(hydrolase activity)	NA	K01476	EC:3.5.3.1	NA	MSTRG.6301.1	MSTRG.6301	.	yes	novel	trans	NA	-55.86	0.99794
ENSSSCT00000027554	0	chr1	35463102	35466461	MSTRG.356	ARG1	yes	GO:0046872(metal ion binding);GO:0016813(hydrolase activity, acting on carbon-nitrogen (but not peptide) bonds, in linear amidines);GO:0016787(hydrolase activity)	NA	K01476	EC:3.5.3.1	NA	MSTRG.6500.1	MSTRG.6500	.	yes	novel	trans	NA	-39.14	0.959488
ENSSSCT00000027554	0	chr1	35463102	35466461	MSTRG.356	ARG1	yes	GO:0046872(metal ion binding);GO:0016813(hydrolase activity, acting on carbon-nitrogen (but not peptide) bonds, in linear amidines);GO:0016787(hydrolase activity)	NA	K01476	EC:3.5.3.1	NA	MSTRG.7456.1	MSTRG.7456	IL17RB	yes	novel	trans	NA	-65.06	-0.969469
ENSSSCT00000027554	0	chr1	35463102	35466461	MSTRG.356	ARG1	yes	GO:0046872(metal ion binding);GO:0016813(hydrolase activity, acting on carbon-nitrogen (but not peptide) bonds, in linear amidines);GO:0016787(hydrolase activity)	NA	K01476	EC:3.5.3.1	NA	MSTRG.9389.1	MSTRG.9389	ENSSSCG00000030480	yes	novel	trans	NA	-49.19	-0.95398
ENSSSCT00000027554	0	chr1	35463102	35466461	MSTRG.356	ARG1	yes	GO:0046872(metal ion binding);GO:0016813(hydrolase activity, acting on carbon-nitrogen (but not peptide) bonds, in linear amidines);GO:0016787(hydrolase activity)	NA	K01476	EC:3.5.3.1	NA	MSTRG.10360.1	MSTRG.10360	.	yes	novel	trans	NA	-50.41	0.990566
ENSSSCT00000027554	0	chr1	35463102	35466461	MSTRG.356	ARG1	yes	GO:0046872(metal ion binding);GO:0016813(hydrolase activity, acting on carbon-nitrogen (but not peptide) bonds, in linear amidines);GO:0016787(hydrolase activity)	NA	K01476	EC:3.5.3.1	NA	MSTRG.11036.1	MSTRG.11036	.	yes	novel	trans	NA	-30.51	0.988969
ENSSSCT00000027554	0	chr1	35463102	35466461	MSTRG.356	ARG1	yes	GO:0046872(metal ion binding);GO:0016813(hydrolase activity, acting on carbon-nitrogen (but not peptide) bonds, in linear amidines);GO:0016787(hydrolase activity)	NA	K01476	EC:3.5.3.1	NA	MSTRG.11081.1	MSTRG.11081	.	yes	novel	trans	NA	-44.11	-0.971105
ENSSSCT00000027554	0	chr1	35463102	35466461	MSTRG.356	ARG1	yes	GO:0046872(metal ion binding);GO:0016813(hydrolase activity, acting on carbon-nitrogen (but not peptide) bonds, in linear amidines);GO:0016787(hydrolase activity)	NA	K01476	EC:3.5.3.1	NA	MSTRG.13663.1	MSTRG.13663	.	yes	novel	trans	NA	-21.49	0.96483
ENSSSCT00000027554	0	chr1	35463102	35466461	MSTRG.356	ARG1	yes	GO:0046872(metal ion binding);GO:0016813(hydrolase activity, acting on carbon-nitrogen (but not peptide) bonds, in linear amidines);GO:0016787(hydrolase activity)	NA	K01476	EC:3.5.3.1	NA	MSTRG.14046.1	MSTRG.14046	.	yes	novel	trans	NA	-50.51	0.984129
ENSSSCT00000027554	0	chr1	35463102	35466461	MSTRG.356	ARG1	yes	GO:0046872(metal ion binding);GO:0016813(hydrolase activity, acting on carbon-nitrogen (but not peptide) bonds, in linear amidines);GO:0016787(hydrolase activity)	NA	K01476	EC:3.5.3.1	NA	MSTRG.14254.1	MSTRG.14254	.	yes	novel	trans	NA	-30.26	0.960163
ENSSSCT00000027554	0	chr1	35463102	35466461	MSTRG.356	ARG1	yes	GO:0046872(metal ion binding);GO:0016813(hydrolase activity, acting on carbon-nitrogen (but not peptide) bonds, in linear amidines);GO:0016787(hydrolase activity)	NA	K01476	EC:3.5.3.1	NA	MSTRG.14497.1	MSTRG.14497	.	yes	novel	trans	NA	-29.86	-0.959188
ENSSSCT00000027554	0	chr1	35463102	35466461	MSTRG.356	ARG1	yes	GO:0046872(metal ion binding);GO:0016813(hydrolase activity, acting on carbon-nitrogen (but not peptide) bonds, in linear amidines);GO:0016787(hydrolase activity)	NA	K01476	EC:3.5.3.1	NA	MSTRG.15900.1	MSTRG.15900	.	yes	novel	trans	NA	-50.15	0.961643
ENSSSCT00000027554	0	chr1	35463102	35466461	MSTRG.356	ARG1	yes	GO:0046872(metal ion binding);GO:0016813(hydrolase activity, acting on carbon-nitrogen (but not peptide) bonds, in linear amidines);GO:0016787(hydrolase activity)	NA	K01476	EC:3.5.3.1	NA	MSTRG.16154.1	MSTRG.16154	.	yes	novel	trans	NA	-46.47	0.951003
ENSSSCT00000027554	0	chr1	35463102	35466461	MSTRG.356	ARG1	yes	GO:0046872(metal ion binding);GO:0016813(hydrolase activity, acting on carbon-nitrogen (but not peptide) bonds, in linear amidines);GO:0016787(hydrolase activity)	NA	K01476	EC:3.5.3.1	NA	MSTRG.16956.1	MSTRG.16956	.	yes	novel	trans	NA	-38.26	0.977565
ENSSSCT00000027554	0	chr1	35463102	35466461	MSTRG.356	ARG1	yes	GO:0046872(metal ion binding);GO:0016813(hydrolase activity, acting on carbon-nitrogen (but not peptide) bonds, in linear amidines);GO:0016787(hydrolase activity)	NA	K01476	EC:3.5.3.1	NA	MSTRG.17206.1	MSTRG.17206	.	yes	novel	trans	NA	-39.29	-0.967597
ENSSSCT00000027554	0	chr1	35463102	35466461	MSTRG.356	ARG1	yes	GO:0046872(metal ion binding);GO:0016813(hydrolase activity, acting on carbon-nitrogen (but not peptide) bonds, in linear amidines);GO:0016787(hydrolase activity)	NA	K01476	EC:3.5.3.1	NA	MSTRG.19072.1	MSTRG.19072	.	yes	novel	trans	NA	-47.38	0.956181
ENSSSCT00000027554	0	chr1	35463102	35466461	MSTRG.356	ARG1	yes	GO:0046872(metal ion binding);GO:0016813(hydrolase activity, acting on carbon-nitrogen (but not peptide) bonds, in linear amidines);GO:0016787(hydrolase activity)	NA	K01476	EC:3.5.3.1	NA	MSTRG.20540.1	MSTRG.20540	.	yes	novel	trans	NA	-67.02	-0.967089
ENSSSCT00000027554	0	chr1	35463102	35466461	MSTRG.356	ARG1	yes	GO:0046872(metal ion binding);GO:0016813(hydrolase activity, acting on carbon-nitrogen (but not peptide) bonds, in linear amidines);GO:0016787(hydrolase activity)	NA	K01476	EC:3.5.3.1	NA	MSTRG.21494.1	MSTRG.21494	.	yes	novel	trans	NA	-29.11	-0.959099
ENSSSCT00000027554	0	chr1	35463102	35466461	MSTRG.356	ARG1	yes	GO:0046872(metal ion binding);GO:0016813(hydrolase activity, acting on carbon-nitrogen (but not peptide) bonds, in linear amidines);GO:0016787(hydrolase activity)	NA	K01476	EC:3.5.3.1	NA	MSTRG.22503.1	MSTRG.22503	CIART	yes	novel	trans	NA	-39.40	0.974058
ENSSSCT00000027554	0	chr1	35463102	35466461	MSTRG.356	ARG1	yes	GO:0046872(metal ion binding);GO:0016813(hydrolase activity, acting on carbon-nitrogen (but not peptide) bonds, in linear amidines);GO:0016787(hydrolase activity)	NA	K01476	EC:3.5.3.1	NA	MSTRG.23310.1	MSTRG.23310	.	yes	novel	trans	NA	-32.66	-0.958052
ENSSSCT00000027554	0	chr1	35463102	35466461	MSTRG.356	ARG1	yes	GO:0046872(metal ion binding);GO:0016813(hydrolase activity, acting on carbon-nitrogen (but not peptide) bonds, in linear amidines);GO:0016787(hydrolase activity)	NA	K01476	EC:3.5.3.1	NA	MSTRG.24277.1	MSTRG.24277	.	yes	novel	trans	NA	-36.78	0.989055
ENSSSCT00000027554	0	chr1	35463102	35466461	MSTRG.356	ARG1	yes	GO:0046872(metal ion binding);GO:0016813(hydrolase activity, acting on carbon-nitrogen (but not peptide) bonds, in linear amidines);GO:0016787(hydrolase activity)	NA	K01476	EC:3.5.3.1	NA	MSTRG.24765.1	MSTRG.24765	ACSS3	yes	novel	trans	NA	-37.29	0.951531
ENSSSCT00000027554	0	chr1	35463102	35466461	MSTRG.356	ARG1	yes	GO:0046872(metal ion binding);GO:0016813(hydrolase activity, acting on carbon-nitrogen (but not peptide) bonds, in linear amidines);GO:0016787(hydrolase activity)	NA	K01476	EC:3.5.3.1	NA	MSTRG.25871.1	MSTRG.25871	PIH1D1	yes	novel	trans	NA	-41.18	0.974344
ENSSSCT00000027554	0	chr1	35463102	35466461	MSTRG.356	ARG1	yes	GO:0046872(metal ion binding);GO:0016813(hydrolase activity, acting on carbon-nitrogen (but not peptide) bonds, in linear amidines);GO:0016787(hydrolase activity)	NA	K01476	EC:3.5.3.1	NA	MSTRG.26444.1	MSTRG.26444	.	yes	novel	trans	NA	-79.95	0.987993
ENSSSCT00000027554	0	chr1	35463102	35466461	MSTRG.356	ARG1	yes	GO:0046872(metal ion binding);GO:0016813(hydrolase activity, acting on carbon-nitrogen (but not peptide) bonds, in linear amidines);GO:0016787(hydrolase activity)	NA	K01476	EC:3.5.3.1	NA	MSTRG.26729.1	MSTRG.26729	.	yes	novel	trans	NA	-41.41	0.964108
ENSSSCT00000027554	0	chr1	35463102	35466461	MSTRG.356	ARG1	yes	GO:0046872(metal ion binding);GO:0016813(hydrolase activity, acting on carbon-nitrogen (but not peptide) bonds, in linear amidines);GO:0016787(hydrolase activity)	NA	K01476	EC:3.5.3.1	NA	MSTRG.26758.1	MSTRG.26758	ENSSSCG00000027352	yes	novel	trans	NA	-59.39	0.993419
ENSSSCT00000027554	0	chr1	35463102	35466461	MSTRG.356	ARG1	yes	GO:0046872(metal ion binding);GO:0016813(hydrolase activity, acting on carbon-nitrogen (but not peptide) bonds, in linear amidines);GO:0016787(hydrolase activity)	NA	K01476	EC:3.5.3.1	NA	MSTRG.27290.1	MSTRG.27290	.	yes	novel	trans	NA	-30.67	0.963869
ENSSSCT00000027554	0	chr1	35463102	35466461	MSTRG.356	ARG1	yes	GO:0046872(metal ion binding);GO:0016813(hydrolase activity, acting on carbon-nitrogen (but not peptide) bonds, in linear amidines);GO:0016787(hydrolase activity)	NA	K01476	EC:3.5.3.1	NA	MSTRG.27332.1	MSTRG.27332	.	yes	novel	trans	NA	-31.03	0.967092
ENSSSCT00000027554	0	chr1	35463102	35466461	MSTRG.356	ARG1	yes	GO:0046872(metal ion binding);GO:0016813(hydrolase activity, acting on carbon-nitrogen (but not peptide) bonds, in linear amidines);GO:0016787(hydrolase activity)	NA	K01476	EC:3.5.3.1	NA	MSTRG.27711.1	MSTRG.27711	.	yes	novel	trans	NA	-44.64	-0.974968
ENSSSCT00000027554	0	chr1	35463102	35466461	MSTRG.356	ARG1	yes	GO:0046872(metal ion binding);GO:0016813(hydrolase activity, acting on carbon-nitrogen (but not peptide) bonds, in linear amidines);GO:0016787(hydrolase activity)	NA	K01476	EC:3.5.3.1	NA	MSTRG.28025.1	MSTRG.28025	.	yes	novel	trans	NA	-85.34	0.977282
ENSSSCT00000027554	0	chr1	35463102	35466461	MSTRG.356	ARG1	yes	GO:0046872(metal ion binding);GO:0016813(hydrolase activity, acting on carbon-nitrogen (but not peptide) bonds, in linear amidines);GO:0016787(hydrolase activity)	NA	K01476	EC:3.5.3.1	NA	MSTRG.28708.1	MSTRG.28708	.	yes	novel	trans	NA	-39.93	0.962431
ENSSSCT00000027554	0	chr1	35463102	35466461	MSTRG.356	ARG1	yes	GO:0046872(metal ion binding);GO:0016813(hydrolase activity, acting on carbon-nitrogen (but not peptide) bonds, in linear amidines);GO:0016787(hydrolase activity)	NA	K01476	EC:3.5.3.1	NA	MSTRG.28979.5	MSTRG.28979	SNORA79	yes	novel	trans	NA	-42.67	0.969861
ENSSSCT00000027554	0	chr1	35463102	35466461	MSTRG.356	ARG1	yes	GO:0046872(metal ion binding);GO:0016813(hydrolase activity, acting on carbon-nitrogen (but not peptide) bonds, in linear amidines);GO:0016787(hydrolase activity)	NA	K01476	EC:3.5.3.1	NA	MSTRG.28976.1	MSTRG.28976	.	yes	novel	trans	NA	-37.25	0.972587
ENSSSCT00000027554	0	chr1	35463102	35466461	MSTRG.356	ARG1	yes	GO:0046872(metal ion binding);GO:0016813(hydrolase activity, acting on carbon-nitrogen (but not peptide) bonds, in linear amidines);GO:0016787(hydrolase activity)	NA	K01476	EC:3.5.3.1	NA	MSTRG.30173.1	MSTRG.30173	CXCL2	yes	novel	trans	NA	-73.91	0.983904
ENSSSCT00000027554	0	chr1	35463102	35466461	MSTRG.356	ARG1	yes	GO:0046872(metal ion binding);GO:0016813(hydrolase activity, acting on carbon-nitrogen (but not peptide) bonds, in linear amidines);GO:0016787(hydrolase activity)	NA	K01476	EC:3.5.3.1	NA	MSTRG.30209.1	MSTRG.30209	.	yes	novel	trans	NA	-33.55	0.978747
ENSSSCT00000027554	0	chr1	35463102	35466461	MSTRG.356	ARG1	yes	GO:0046872(metal ion binding);GO:0016813(hydrolase activity, acting on carbon-nitrogen (but not peptide) bonds, in linear amidines);GO:0016787(hydrolase activity)	NA	K01476	EC:3.5.3.1	NA	MSTRG.30732.1	MSTRG.30732	.	yes	novel	trans	NA	-41.92	0.987366
ENSSSCT00000027554	0	chr1	35463102	35466461	MSTRG.356	ARG1	yes	GO:0046872(metal ion binding);GO:0016813(hydrolase activity, acting on carbon-nitrogen (but not peptide) bonds, in linear amidines);GO:0016787(hydrolase activity)	NA	K01476	EC:3.5.3.1	NA	MSTRG.31692.1	MSTRG.31692	.	yes	novel	trans	NA	-44.24	0.971223
ENSSSCT00000027554	0	chr1	35463102	35466461	MSTRG.356	ARG1	yes	GO:0046872(metal ion binding);GO:0016813(hydrolase activity, acting on carbon-nitrogen (but not peptide) bonds, in linear amidines);GO:0016787(hydrolase activity)	NA	K01476	EC:3.5.3.1	NA	MSTRG.31992.1	MSTRG.31992	.	yes	novel	trans	NA	-52.18	0.95196
ENSSSCT00000033548	0	chr1	35463556	35465793	MSTRG.356	ARG1	yes	GO:0046872(metal ion binding);GO:0016813(hydrolase activity, acting on carbon-nitrogen (but not peptide) bonds, in linear amidines);GO:0016787(hydrolase activity)	NA	K01476	EC:3.5.3.1	NA	MSTRG.4146.1	MSTRG.4146	.	yes	novel	trans	NA	-26.73	0.978637
ENSSSCT00000033548	0	chr1	35463556	35465793	MSTRG.356	ARG1	yes	GO:0046872(metal ion binding);GO:0016813(hydrolase activity, acting on carbon-nitrogen (but not peptide) bonds, in linear amidines);GO:0016787(hydrolase activity)	NA	K01476	EC:3.5.3.1	NA	MSTRG.6301.1	MSTRG.6301	.	yes	novel	trans	NA	-29.43	0.991268
ENSSSCT00000033548	0	chr1	35463556	35465793	MSTRG.356	ARG1	yes	GO:0046872(metal ion binding);GO:0016813(hydrolase activity, acting on carbon-nitrogen (but not peptide) bonds, in linear amidines);GO:0016787(hydrolase activity)	NA	K01476	EC:3.5.3.1	NA	MSTRG.6500.1	MSTRG.6500	.	yes	novel	trans	NA	-33.98	0.951186
ENSSSCT00000033548	0	chr1	35463556	35465793	MSTRG.356	ARG1	yes	GO:0046872(metal ion binding);GO:0016813(hydrolase activity, acting on carbon-nitrogen (but not peptide) bonds, in linear amidines);GO:0016787(hydrolase activity)	NA	K01476	EC:3.5.3.1	NA	MSTRG.8882.1	MSTRG.8882	.	yes	novel	trans	NA	-26.10	-0.963166
ENSSSCT00000033548	0	chr1	35463556	35465793	MSTRG.356	ARG1	yes	GO:0046872(metal ion binding);GO:0016813(hydrolase activity, acting on carbon-nitrogen (but not peptide) bonds, in linear amidines);GO:0016787(hydrolase activity)	NA	K01476	EC:3.5.3.1	NA	MSTRG.10360.1	MSTRG.10360	.	yes	novel	trans	NA	-35.66	0.990011
ENSSSCT00000033548	0	chr1	35463556	35465793	MSTRG.356	ARG1	yes	GO:0046872(metal ion binding);GO:0016813(hydrolase activity, acting on carbon-nitrogen (but not peptide) bonds, in linear amidines);GO:0016787(hydrolase activity)	NA	K01476	EC:3.5.3.1	NA	MSTRG.11036.1	MSTRG.11036	.	yes	novel	trans	NA	-30.51	0.988443
ENSSSCT00000033548	0	chr1	35463556	35465793	MSTRG.356	ARG1	yes	GO:0046872(metal ion binding);GO:0016813(hydrolase activity, acting on carbon-nitrogen (but not peptide) bonds, in linear amidines);GO:0016787(hydrolase activity)	NA	K01476	EC:3.5.3.1	NA	MSTRG.11081.1	MSTRG.11081	.	yes	novel	trans	NA	-42.85	-0.959642
ENSSSCT00000033548	0	chr1	35463556	35465793	MSTRG.356	ARG1	yes	GO:0046872(metal ion binding);GO:0016813(hydrolase activity, acting on carbon-nitrogen (but not peptide) bonds, in linear amidines);GO:0016787(hydrolase activity)	NA	K01476	EC:3.5.3.1	NA	MSTRG.12278.1	MSTRG.12278	U6	yes	novel	trans	NA	-36.48	0.952335
ENSSSCT00000033548	0	chr1	35463556	35465793	MSTRG.356	ARG1	yes	GO:0046872(metal ion binding);GO:0016813(hydrolase activity, acting on carbon-nitrogen (but not peptide) bonds, in linear amidines);GO:0016787(hydrolase activity)	NA	K01476	EC:3.5.3.1	NA	MSTRG.13663.1	MSTRG.13663	.	yes	novel	trans	NA	-23.51	0.954691
ENSSSCT00000033548	0	chr1	35463556	35465793	MSTRG.356	ARG1	yes	GO:0046872(metal ion binding);GO:0016813(hydrolase activity, acting on carbon-nitrogen (but not peptide) bonds, in linear amidines);GO:0016787(hydrolase activity)	NA	K01476	EC:3.5.3.1	NA	MSTRG.14046.1	MSTRG.14046	.	yes	novel	trans	NA	-35.75	0.962991
ENSSSCT00000033548	0	chr1	35463556	35465793	MSTRG.356	ARG1	yes	GO:0046872(metal ion binding);GO:0016813(hydrolase activity, acting on carbon-nitrogen (but not peptide) bonds, in linear amidines);GO:0016787(hydrolase activity)	NA	K01476	EC:3.5.3.1	NA	MSTRG.15360.1	MSTRG.15360	.	yes	novel	trans	NA	-26.15	-0.958601
ENSSSCT00000033548	0	chr1	35463556	35465793	MSTRG.356	ARG1	yes	GO:0046872(metal ion binding);GO:0016813(hydrolase activity, acting on carbon-nitrogen (but not peptide) bonds, in linear amidines);GO:0016787(hydrolase activity)	NA	K01476	EC:3.5.3.1	NA	MSTRG.15900.1	MSTRG.15900	.	yes	novel	trans	NA	-27.69	0.972687
ENSSSCT00000033548	0	chr1	35463556	35465793	MSTRG.356	ARG1	yes	GO:0046872(metal ion binding);GO:0016813(hydrolase activity, acting on carbon-nitrogen (but not peptide) bonds, in linear amidines);GO:0016787(hydrolase activity)	NA	K01476	EC:3.5.3.1	NA	MSTRG.16154.1	MSTRG.16154	.	yes	novel	trans	NA	-17.36	0.961266
ENSSSCT00000033548	0	chr1	35463556	35465793	MSTRG.356	ARG1	yes	GO:0046872(metal ion binding);GO:0016813(hydrolase activity, acting on carbon-nitrogen (but not peptide) bonds, in linear amidines);GO:0016787(hydrolase activity)	NA	K01476	EC:3.5.3.1	NA	MSTRG.16681.1	MSTRG.16681	.	yes	novel	trans	NA	-41.21	0.965889
ENSSSCT00000033548	0	chr1	35463556	35465793	MSTRG.356	ARG1	yes	GO:0046872(metal ion binding);GO:0016813(hydrolase activity, acting on carbon-nitrogen (but not peptide) bonds, in linear amidines);GO:0016787(hydrolase activity)	NA	K01476	EC:3.5.3.1	NA	MSTRG.16956.1	MSTRG.16956	.	yes	novel	trans	NA	-21.31	0.954445
ENSSSCT00000033548	0	chr1	35463556	35465793	MSTRG.356	ARG1	yes	GO:0046872(metal ion binding);GO:0016813(hydrolase activity, acting on carbon-nitrogen (but not peptide) bonds, in linear amidines);GO:0016787(hydrolase activity)	NA	K01476	EC:3.5.3.1	NA	MSTRG.17629.1	MSTRG.17629	.	yes	novel	trans	NA	-30.88	0.961487
ENSSSCT00000033548	0	chr1	35463556	35465793	MSTRG.356	ARG1	yes	GO:0046872(metal ion binding);GO:0016813(hydrolase activity, acting on carbon-nitrogen (but not peptide) bonds, in linear amidines);GO:0016787(hydrolase activity)	NA	K01476	EC:3.5.3.1	NA	MSTRG.22503.1	MSTRG.22503	CIART	yes	novel	trans	NA	-41.12	0.979164
ENSSSCT00000033548	0	chr1	35463556	35465793	MSTRG.356	ARG1	yes	GO:0046872(metal ion binding);GO:0016813(hydrolase activity, acting on carbon-nitrogen (but not peptide) bonds, in linear amidines);GO:0016787(hydrolase activity)	NA	K01476	EC:3.5.3.1	NA	MSTRG.24277.1	MSTRG.24277	.	yes	novel	trans	NA	-33.00	0.976394
ENSSSCT00000033548	0	chr1	35463556	35465793	MSTRG.356	ARG1	yes	GO:0046872(metal ion binding);GO:0016813(hydrolase activity, acting on carbon-nitrogen (but not peptide) bonds, in linear amidines);GO:0016787(hydrolase activity)	NA	K01476	EC:3.5.3.1	NA	MSTRG.26444.1	MSTRG.26444	.	yes	novel	trans	NA	-41.20	0.982041
ENSSSCT00000033548	0	chr1	35463556	35465793	MSTRG.356	ARG1	yes	GO:0046872(metal ion binding);GO:0016813(hydrolase activity, acting on carbon-nitrogen (but not peptide) bonds, in linear amidines);GO:0016787(hydrolase activity)	NA	K01476	EC:3.5.3.1	NA	MSTRG.26758.1	MSTRG.26758	ENSSSCG00000027352	yes	novel	trans	NA	-39.31	0.987844
ENSSSCT00000033548	0	chr1	35463556	35465793	MSTRG.356	ARG1	yes	GO:0046872(metal ion binding);GO:0016813(hydrolase activity, acting on carbon-nitrogen (but not peptide) bonds, in linear amidines);GO:0016787(hydrolase activity)	NA	K01476	EC:3.5.3.1	NA	MSTRG.27332.1	MSTRG.27332	.	yes	novel	trans	NA	-23.86	0.950287
ENSSSCT00000033548	0	chr1	35463556	35465793	MSTRG.356	ARG1	yes	GO:0046872(metal ion binding);GO:0016813(hydrolase activity, acting on carbon-nitrogen (but not peptide) bonds, in linear amidines);GO:0016787(hydrolase activity)	NA	K01476	EC:3.5.3.1	NA	MSTRG.27711.1	MSTRG.27711	.	yes	novel	trans	NA	-31.90	-0.976483
ENSSSCT00000033548	0	chr1	35463556	35465793	MSTRG.356	ARG1	yes	GO:0046872(metal ion binding);GO:0016813(hydrolase activity, acting on carbon-nitrogen (but not peptide) bonds, in linear amidines);GO:0016787(hydrolase activity)	NA	K01476	EC:3.5.3.1	NA	MSTRG.28025.1	MSTRG.28025	.	yes	novel	trans	NA	-35.74	0.964074
ENSSSCT00000033548	0	chr1	35463556	35465793	MSTRG.356	ARG1	yes	GO:0046872(metal ion binding);GO:0016813(hydrolase activity, acting on carbon-nitrogen (but not peptide) bonds, in linear amidines);GO:0016787(hydrolase activity)	NA	K01476	EC:3.5.3.1	NA	MSTRG.28441.1	MSTRG.28441	.	yes	novel	trans	NA	-28.23	-0.952991
ENSSSCT00000033548	0	chr1	35463556	35465793	MSTRG.356	ARG1	yes	GO:0046872(metal ion binding);GO:0016813(hydrolase activity, acting on carbon-nitrogen (but not peptide) bonds, in linear amidines);GO:0016787(hydrolase activity)	NA	K01476	EC:3.5.3.1	NA	MSTRG.28979.5	MSTRG.28979	SNORA79	yes	novel	trans	NA	-32.97	0.957128
ENSSSCT00000033548	0	chr1	35463556	35465793	MSTRG.356	ARG1	yes	GO:0046872(metal ion binding);GO:0016813(hydrolase activity, acting on carbon-nitrogen (but not peptide) bonds, in linear amidines);GO:0016787(hydrolase activity)	NA	K01476	EC:3.5.3.1	NA	MSTRG.28976.1	MSTRG.28976	.	yes	novel	trans	NA	-23.83	0.976536
ENSSSCT00000033548	0	chr1	35463556	35465793	MSTRG.356	ARG1	yes	GO:0046872(metal ion binding);GO:0016813(hydrolase activity, acting on carbon-nitrogen (but not peptide) bonds, in linear amidines);GO:0016787(hydrolase activity)	NA	K01476	EC:3.5.3.1	NA	MSTRG.29455.1	MSTRG.29455	ENSSSCG00000002451	yes	novel	trans	NA	-43.66	0.972402
ENSSSCT00000033548	0	chr1	35463556	35465793	MSTRG.356	ARG1	yes	GO:0046872(metal ion binding);GO:0016813(hydrolase activity, acting on carbon-nitrogen (but not peptide) bonds, in linear amidines);GO:0016787(hydrolase activity)	NA	K01476	EC:3.5.3.1	NA	MSTRG.30173.1	MSTRG.30173	CXCL2	yes	novel	trans	NA	-17.98	0.979738
ENSSSCT00000033548	0	chr1	35463556	35465793	MSTRG.356	ARG1	yes	GO:0046872(metal ion binding);GO:0016813(hydrolase activity, acting on carbon-nitrogen (but not peptide) bonds, in linear amidines);GO:0016787(hydrolase activity)	NA	K01476	EC:3.5.3.1	NA	MSTRG.30209.1	MSTRG.30209	.	yes	novel	trans	NA	-33.55	0.978999
ENSSSCT00000033548	0	chr1	35463556	35465793	MSTRG.356	ARG1	yes	GO:0046872(metal ion binding);GO:0016813(hydrolase activity, acting on carbon-nitrogen (but not peptide) bonds, in linear amidines);GO:0016787(hydrolase activity)	NA	K01476	EC:3.5.3.1	NA	MSTRG.30732.1	MSTRG.30732	.	yes	novel	trans	NA	-20.21	0.976858
ENSSSCT00000033548	0	chr1	35463556	35465793	MSTRG.356	ARG1	yes	GO:0046872(metal ion binding);GO:0016813(hydrolase activity, acting on carbon-nitrogen (but not peptide) bonds, in linear amidines);GO:0016787(hydrolase activity)	NA	K01476	EC:3.5.3.1	NA	MSTRG.31692.1	MSTRG.31692	.	yes	novel	trans	NA	-34.64	0.965261
ENSSSCT00000035404	0	chr1	35463607	35464819	MSTRG.356	ARG1	yes	GO:0046872(metal ion binding);GO:0016813(hydrolase activity, acting on carbon-nitrogen (but not peptide) bonds, in linear amidines);GO:0016787(hydrolase activity)	NA	K01476	EC:3.5.3.1	NA	MSTRG.3988.1	MSTRG.3988	.	yes	novel	trans	NA	-40.32	-0.953899
ENSSSCT00000035404	0	chr1	35463607	35464819	MSTRG.356	ARG1	yes	GO:0046872(metal ion binding);GO:0016813(hydrolase activity, acting on carbon-nitrogen (but not peptide) bonds, in linear amidines);GO:0016787(hydrolase activity)	NA	K01476	EC:3.5.3.1	NA	MSTRG.5886.1	MSTRG.5886	.	yes	novel	trans	NA	-38.80	0.967494
ENSSSCT00000035404	0	chr1	35463607	35464819	MSTRG.356	ARG1	yes	GO:0046872(metal ion binding);GO:0016813(hydrolase activity, acting on carbon-nitrogen (but not peptide) bonds, in linear amidines);GO:0016787(hydrolase activity)	NA	K01476	EC:3.5.3.1	NA	MSTRG.6301.1	MSTRG.6301	.	yes	novel	trans	NA	-29.43	0.991828
ENSSSCT00000035404	0	chr1	35463607	35464819	MSTRG.356	ARG1	yes	GO:0046872(metal ion binding);GO:0016813(hydrolase activity, acting on carbon-nitrogen (but not peptide) bonds, in linear amidines);GO:0016787(hydrolase activity)	NA	K01476	EC:3.5.3.1	NA	MSTRG.7456.1	MSTRG.7456	IL17RB	yes	novel	trans	NA	-38.02	-0.960292
ENSSSCT00000035404	0	chr1	35463607	35464819	MSTRG.356	ARG1	yes	GO:0046872(metal ion binding);GO:0016813(hydrolase activity, acting on carbon-nitrogen (but not peptide) bonds, in linear amidines);GO:0016787(hydrolase activity)	NA	K01476	EC:3.5.3.1	NA	MSTRG.10360.1	MSTRG.10360	.	yes	novel	trans	NA	-35.66	0.98874
ENSSSCT00000035404	0	chr1	35463607	35464819	MSTRG.356	ARG1	yes	GO:0046872(metal ion binding);GO:0016813(hydrolase activity, acting on carbon-nitrogen (but not peptide) bonds, in linear amidines);GO:0016787(hydrolase activity)	NA	K01476	EC:3.5.3.1	NA	MSTRG.11036.1	MSTRG.11036	.	yes	novel	trans	NA	-30.51	0.981188
ENSSSCT00000035404	0	chr1	35463607	35464819	MSTRG.356	ARG1	yes	GO:0046872(metal ion binding);GO:0016813(hydrolase activity, acting on carbon-nitrogen (but not peptide) bonds, in linear amidines);GO:0016787(hydrolase activity)	NA	K01476	EC:3.5.3.1	NA	MSTRG.11081.1	MSTRG.11081	.	yes	novel	trans	NA	-42.85	-0.967906
ENSSSCT00000035404	0	chr1	35463607	35464819	MSTRG.356	ARG1	yes	GO:0046872(metal ion binding);GO:0016813(hydrolase activity, acting on carbon-nitrogen (but not peptide) bonds, in linear amidines);GO:0016787(hydrolase activity)	NA	K01476	EC:3.5.3.1	NA	MSTRG.12579.1	MSTRG.12579	.	yes	novel	trans	NA	-43.11	0.959507
ENSSSCT00000035404	0	chr1	35463607	35464819	MSTRG.356	ARG1	yes	GO:0046872(metal ion binding);GO:0016813(hydrolase activity, acting on carbon-nitrogen (but not peptide) bonds, in linear amidines);GO:0016787(hydrolase activity)	NA	K01476	EC:3.5.3.1	NA	MSTRG.13917.1	MSTRG.13917	.	yes	novel	trans	NA	-30.28	0.964904
ENSSSCT00000035404	0	chr1	35463607	35464819	MSTRG.356	ARG1	yes	GO:0046872(metal ion binding);GO:0016813(hydrolase activity, acting on carbon-nitrogen (but not peptide) bonds, in linear amidines);GO:0016787(hydrolase activity)	NA	K01476	EC:3.5.3.1	NA	MSTRG.14046.1	MSTRG.14046	.	yes	novel	trans	NA	-24.64	0.986881
ENSSSCT00000035404	0	chr1	35463607	35464819	MSTRG.356	ARG1	yes	GO:0046872(metal ion binding);GO:0016813(hydrolase activity, acting on carbon-nitrogen (but not peptide) bonds, in linear amidines);GO:0016787(hydrolase activity)	NA	K01476	EC:3.5.3.1	NA	MSTRG.14497.1	MSTRG.14497	.	yes	novel	trans	NA	-37.25	-0.96523
ENSSSCT00000035404	0	chr1	35463607	35464819	MSTRG.356	ARG1	yes	GO:0046872(metal ion binding);GO:0016813(hydrolase activity, acting on carbon-nitrogen (but not peptide) bonds, in linear amidines);GO:0016787(hydrolase activity)	NA	K01476	EC:3.5.3.1	NA	MSTRG.15900.1	MSTRG.15900	.	yes	novel	trans	NA	-27.69	0.96777
ENSSSCT00000035404	0	chr1	35463607	35464819	MSTRG.356	ARG1	yes	GO:0046872(metal ion binding);GO:0016813(hydrolase activity, acting on carbon-nitrogen (but not peptide) bonds, in linear amidines);GO:0016787(hydrolase activity)	NA	K01476	EC:3.5.3.1	NA	MSTRG.16154.1	MSTRG.16154	.	yes	novel	trans	NA	-23.74	0.958811
ENSSSCT00000035404	0	chr1	35463607	35464819	MSTRG.356	ARG1	yes	GO:0046872(metal ion binding);GO:0016813(hydrolase activity, acting on carbon-nitrogen (but not peptide) bonds, in linear amidines);GO:0016787(hydrolase activity)	NA	K01476	EC:3.5.3.1	NA	MSTRG.16956.1	MSTRG.16956	.	yes	novel	trans	NA	-21.31	0.975305
ENSSSCT00000035404	0	chr1	35463607	35464819	MSTRG.356	ARG1	yes	GO:0046872(metal ion binding);GO:0016813(hydrolase activity, acting on carbon-nitrogen (but not peptide) bonds, in linear amidines);GO:0016787(hydrolase activity)	NA	K01476	EC:3.5.3.1	NA	MSTRG.17629.1	MSTRG.17629	.	yes	novel	trans	NA	-30.88	0.969973
ENSSSCT00000035404	0	chr1	35463607	35464819	MSTRG.356	ARG1	yes	GO:0046872(metal ion binding);GO:0016813(hydrolase activity, acting on carbon-nitrogen (but not peptide) bonds, in linear amidines);GO:0016787(hydrolase activity)	NA	K01476	EC:3.5.3.1	NA	MSTRG.19072.1	MSTRG.19072	.	yes	novel	trans	NA	-35.53	0.953007
ENSSSCT00000035404	0	chr1	35463607	35464819	MSTRG.356	ARG1	yes	GO:0046872(metal ion binding);GO:0016813(hydrolase activity, acting on carbon-nitrogen (but not peptide) bonds, in linear amidines);GO:0016787(hydrolase activity)	NA	K01476	EC:3.5.3.1	NA	MSTRG.22503.1	MSTRG.22503	CIART	yes	novel	trans	NA	-41.12	0.963124
ENSSSCT00000035404	0	chr1	35463607	35464819	MSTRG.356	ARG1	yes	GO:0046872(metal ion binding);GO:0016813(hydrolase activity, acting on carbon-nitrogen (but not peptide) bonds, in linear amidines);GO:0016787(hydrolase activity)	NA	K01476	EC:3.5.3.1	NA	MSTRG.23310.1	MSTRG.23310	.	yes	novel	trans	NA	-32.66	-0.963245
ENSSSCT00000035404	0	chr1	35463607	35464819	MSTRG.356	ARG1	yes	GO:0046872(metal ion binding);GO:0016813(hydrolase activity, acting on carbon-nitrogen (but not peptide) bonds, in linear amidines);GO:0016787(hydrolase activity)	NA	K01476	EC:3.5.3.1	NA	MSTRG.24277.1	MSTRG.24277	.	yes	novel	trans	NA	-22.91	0.984342
ENSSSCT00000035404	0	chr1	35463607	35464819	MSTRG.356	ARG1	yes	GO:0046872(metal ion binding);GO:0016813(hydrolase activity, acting on carbon-nitrogen (but not peptide) bonds, in linear amidines);GO:0016787(hydrolase activity)	NA	K01476	EC:3.5.3.1	NA	MSTRG.24765.1	MSTRG.24765	ACSS3	yes	novel	trans	NA	-35.43	0.966051
ENSSSCT00000035404	0	chr1	35463607	35464819	MSTRG.356	ARG1	yes	GO:0046872(metal ion binding);GO:0016813(hydrolase activity, acting on carbon-nitrogen (but not peptide) bonds, in linear amidines);GO:0016787(hydrolase activity)	NA	K01476	EC:3.5.3.1	NA	MSTRG.26444.1	MSTRG.26444	.	yes	novel	trans	NA	-17.61	0.977022
ENSSSCT00000035404	0	chr1	35463607	35464819	MSTRG.356	ARG1	yes	GO:0046872(metal ion binding);GO:0016813(hydrolase activity, acting on carbon-nitrogen (but not peptide) bonds, in linear amidines);GO:0016787(hydrolase activity)	NA	K01476	EC:3.5.3.1	NA	MSTRG.26758.1	MSTRG.26758	ENSSSCG00000027352	yes	novel	trans	NA	-22.81	0.994055
ENSSSCT00000035404	0	chr1	35463607	35464819	MSTRG.356	ARG1	yes	GO:0046872(metal ion binding);GO:0016813(hydrolase activity, acting on carbon-nitrogen (but not peptide) bonds, in linear amidines);GO:0016787(hydrolase activity)	NA	K01476	EC:3.5.3.1	NA	MSTRG.27290.1	MSTRG.27290	.	yes	novel	trans	NA	-18.81	0.9581
ENSSSCT00000035404	0	chr1	35463607	35464819	MSTRG.356	ARG1	yes	GO:0046872(metal ion binding);GO:0016813(hydrolase activity, acting on carbon-nitrogen (but not peptide) bonds, in linear amidines);GO:0016787(hydrolase activity)	NA	K01476	EC:3.5.3.1	NA	MSTRG.27332.1	MSTRG.27332	.	yes	novel	trans	NA	-23.86	0.967833
ENSSSCT00000035404	0	chr1	35463607	35464819	MSTRG.356	ARG1	yes	GO:0046872(metal ion binding);GO:0016813(hydrolase activity, acting on carbon-nitrogen (but not peptide) bonds, in linear amidines);GO:0016787(hydrolase activity)	NA	K01476	EC:3.5.3.1	NA	MSTRG.27711.1	MSTRG.27711	.	yes	novel	trans	NA	-20.18	-0.97413
ENSSSCT00000035404	0	chr1	35463607	35464819	MSTRG.356	ARG1	yes	GO:0046872(metal ion binding);GO:0016813(hydrolase activity, acting on carbon-nitrogen (but not peptide) bonds, in linear amidines);GO:0016787(hydrolase activity)	NA	K01476	EC:3.5.3.1	NA	MSTRG.28025.1	MSTRG.28025	.	yes	novel	trans	NA	-35.74	0.96682
ENSSSCT00000035404	0	chr1	35463607	35464819	MSTRG.356	ARG1	yes	GO:0046872(metal ion binding);GO:0016813(hydrolase activity, acting on carbon-nitrogen (but not peptide) bonds, in linear amidines);GO:0016787(hydrolase activity)	NA	K01476	EC:3.5.3.1	NA	MSTRG.28441.1	MSTRG.28441	.	yes	novel	trans	NA	-16.90	-0.971694
ENSSSCT00000035404	0	chr1	35463607	35464819	MSTRG.356	ARG1	yes	GO:0046872(metal ion binding);GO:0016813(hydrolase activity, acting on carbon-nitrogen (but not peptide) bonds, in linear amidines);GO:0016787(hydrolase activity)	NA	K01476	EC:3.5.3.1	NA	MSTRG.28708.1	MSTRG.28708	.	yes	novel	trans	NA	-17.86	0.960722
ENSSSCT00000035404	0	chr1	35463607	35464819	MSTRG.356	ARG1	yes	GO:0046872(metal ion binding);GO:0016813(hydrolase activity, acting on carbon-nitrogen (but not peptide) bonds, in linear amidines);GO:0016787(hydrolase activity)	NA	K01476	EC:3.5.3.1	NA	MSTRG.28979.5	MSTRG.28979	SNORA79	yes	novel	trans	NA	-32.97	0.983687
ENSSSCT00000035404	0	chr1	35463607	35464819	MSTRG.356	ARG1	yes	GO:0046872(metal ion binding);GO:0016813(hydrolase activity, acting on carbon-nitrogen (but not peptide) bonds, in linear amidines);GO:0016787(hydrolase activity)	NA	K01476	EC:3.5.3.1	NA	MSTRG.28976.1	MSTRG.28976	.	yes	novel	trans	NA	-23.83	0.989834
ENSSSCT00000035404	0	chr1	35463607	35464819	MSTRG.356	ARG1	yes	GO:0046872(metal ion binding);GO:0016813(hydrolase activity, acting on carbon-nitrogen (but not peptide) bonds, in linear amidines);GO:0016787(hydrolase activity)	NA	K01476	EC:3.5.3.1	NA	MSTRG.30173.1	MSTRG.30173	CXCL2	yes	novel	trans	NA	-17.98	0.981005
ENSSSCT00000035404	0	chr1	35463607	35464819	MSTRG.356	ARG1	yes	GO:0046872(metal ion binding);GO:0016813(hydrolase activity, acting on carbon-nitrogen (but not peptide) bonds, in linear amidines);GO:0016787(hydrolase activity)	NA	K01476	EC:3.5.3.1	NA	MSTRG.30209.1	MSTRG.30209	.	yes	novel	trans	NA	-33.55	0.964571
ENSSSCT00000035404	0	chr1	35463607	35464819	MSTRG.356	ARG1	yes	GO:0046872(metal ion binding);GO:0016813(hydrolase activity, acting on carbon-nitrogen (but not peptide) bonds, in linear amidines);GO:0016787(hydrolase activity)	NA	K01476	EC:3.5.3.1	NA	MSTRG.30732.1	MSTRG.30732	.	yes	novel	trans	NA	-20.21	0.977792
ENSSSCT00000035404	0	chr1	35463607	35464819	MSTRG.356	ARG1	yes	GO:0046872(metal ion binding);GO:0016813(hydrolase activity, acting on carbon-nitrogen (but not peptide) bonds, in linear amidines);GO:0016787(hydrolase activity)	NA	K01476	EC:3.5.3.1	NA	MSTRG.31692.1	MSTRG.31692	.	yes	novel	trans	NA	-34.64	0.98002
ENSSSCT00000004636	0	chr1	35580461	35594611	MSTRG.361	ENSSSCG00000004195	yes	GO:0005737(cytoplasm);GO:0006525(arginine metabolic process);GO:0000050(urea cycle);GO:0046872(metal ion binding);GO:0016813(hydrolase activity, acting on carbon-nitrogen (but not peptide) bonds, in linear amidines);GO:0016787(hydrolase activity);GO:0004053(arginase activity)	01230(Biosynthesis of amino acids);00330(Arginine and proline metabolism);05146(Amoebiasis)	NA	NA	Arginase-1 [Source:UniProtKB/Swiss-Prot;Acc:Q95JC8]	MSTRG.4146.1	MSTRG.4146	.	yes	novel	trans	NA	-48.32	0.954693
ENSSSCT00000004636	0	chr1	35580461	35594611	MSTRG.361	ENSSSCG00000004195	yes	GO:0005737(cytoplasm);GO:0006525(arginine metabolic process);GO:0000050(urea cycle);GO:0046872(metal ion binding);GO:0016813(hydrolase activity, acting on carbon-nitrogen (but not peptide) bonds, in linear amidines);GO:0016787(hydrolase activity);GO:0004053(arginase activity)	01230(Biosynthesis of amino acids);00330(Arginine and proline metabolism);05146(Amoebiasis)	NA	NA	Arginase-1 [Source:UniProtKB/Swiss-Prot;Acc:Q95JC8]	MSTRG.4592.1	MSTRG.4592	.	yes	novel	trans	NA	-28.23	0.955263
ENSSSCT00000004636	0	chr1	35580461	35594611	MSTRG.361	ENSSSCG00000004195	yes	GO:0005737(cytoplasm);GO:0006525(arginine metabolic process);GO:0000050(urea cycle);GO:0046872(metal ion binding);GO:0016813(hydrolase activity, acting on carbon-nitrogen (but not peptide) bonds, in linear amidines);GO:0016787(hydrolase activity);GO:0004053(arginase activity)	01230(Biosynthesis of amino acids);00330(Arginine and proline metabolism);05146(Amoebiasis)	NA	NA	Arginase-1 [Source:UniProtKB/Swiss-Prot;Acc:Q95JC8]	MSTRG.4625.3	MSTRG.4625	.	yes	novel	trans	NA	-37.48	0.956931
ENSSSCT00000004636	0	chr1	35580461	35594611	MSTRG.361	ENSSSCG00000004195	yes	GO:0005737(cytoplasm);GO:0006525(arginine metabolic process);GO:0000050(urea cycle);GO:0046872(metal ion binding);GO:0016813(hydrolase activity, acting on carbon-nitrogen (but not peptide) bonds, in linear amidines);GO:0016787(hydrolase activity);GO:0004053(arginase activity)	01230(Biosynthesis of amino acids);00330(Arginine and proline metabolism);05146(Amoebiasis)	NA	NA	Arginase-1 [Source:UniProtKB/Swiss-Prot;Acc:Q95JC8]	MSTRG.5886.1	MSTRG.5886	.	yes	novel	trans	NA	-17.29	0.955332
ENSSSCT00000004636	0	chr1	35580461	35594611	MSTRG.361	ENSSSCG00000004195	yes	GO:0005737(cytoplasm);GO:0006525(arginine metabolic process);GO:0000050(urea cycle);GO:0046872(metal ion binding);GO:0016813(hydrolase activity, acting on carbon-nitrogen (but not peptide) bonds, in linear amidines);GO:0016787(hydrolase activity);GO:0004053(arginase activity)	01230(Biosynthesis of amino acids);00330(Arginine and proline metabolism);05146(Amoebiasis)	NA	NA	Arginase-1 [Source:UniProtKB/Swiss-Prot;Acc:Q95JC8]	MSTRG.6301.1	MSTRG.6301	.	yes	novel	trans	NA	-31.06	0.997581
ENSSSCT00000004636	0	chr1	35580461	35594611	MSTRG.361	ENSSSCG00000004195	yes	GO:0005737(cytoplasm);GO:0006525(arginine metabolic process);GO:0000050(urea cycle);GO:0046872(metal ion binding);GO:0016813(hydrolase activity, acting on carbon-nitrogen (but not peptide) bonds, in linear amidines);GO:0016787(hydrolase activity);GO:0004053(arginase activity)	01230(Biosynthesis of amino acids);00330(Arginine and proline metabolism);05146(Amoebiasis)	NA	NA	Arginase-1 [Source:UniProtKB/Swiss-Prot;Acc:Q95JC8]	MSTRG.6500.1	MSTRG.6500	.	yes	novel	trans	NA	-33.98	0.964872
ENSSSCT00000004636	0	chr1	35580461	35594611	MSTRG.361	ENSSSCG00000004195	yes	GO:0005737(cytoplasm);GO:0006525(arginine metabolic process);GO:0000050(urea cycle);GO:0046872(metal ion binding);GO:0016813(hydrolase activity, acting on carbon-nitrogen (but not peptide) bonds, in linear amidines);GO:0016787(hydrolase activity);GO:0004053(arginase activity)	01230(Biosynthesis of amino acids);00330(Arginine and proline metabolism);05146(Amoebiasis)	NA	NA	Arginase-1 [Source:UniProtKB/Swiss-Prot;Acc:Q95JC8]	MSTRG.7456.1	MSTRG.7456	IL17RB	yes	novel	trans	NA	-22.06	-0.965217
ENSSSCT00000004636	0	chr1	35580461	35594611	MSTRG.361	ENSSSCG00000004195	yes	GO:0005737(cytoplasm);GO:0006525(arginine metabolic process);GO:0000050(urea cycle);GO:0046872(metal ion binding);GO:0016813(hydrolase activity, acting on carbon-nitrogen (but not peptide) bonds, in linear amidines);GO:0016787(hydrolase activity);GO:0004053(arginase activity)	01230(Biosynthesis of amino acids);00330(Arginine and proline metabolism);05146(Amoebiasis)	NA	NA	Arginase-1 [Source:UniProtKB/Swiss-Prot;Acc:Q95JC8]	MSTRG.8882.1	MSTRG.8882	.	yes	novel	trans	NA	-38.57	-0.956327
ENSSSCT00000004636	0	chr1	35580461	35594611	MSTRG.361	ENSSSCG00000004195	yes	GO:0005737(cytoplasm);GO:0006525(arginine metabolic process);GO:0000050(urea cycle);GO:0046872(metal ion binding);GO:0016813(hydrolase activity, acting on carbon-nitrogen (but not peptide) bonds, in linear amidines);GO:0016787(hydrolase activity);GO:0004053(arginase activity)	01230(Biosynthesis of amino acids);00330(Arginine and proline metabolism);05146(Amoebiasis)	NA	NA	Arginase-1 [Source:UniProtKB/Swiss-Prot;Acc:Q95JC8]	MSTRG.10360.1	MSTRG.10360	.	yes	novel	trans	NA	-47.43	0.988485
ENSSSCT00000004636	0	chr1	35580461	35594611	MSTRG.361	ENSSSCG00000004195	yes	GO:0005737(cytoplasm);GO:0006525(arginine metabolic process);GO:0000050(urea cycle);GO:0046872(metal ion binding);GO:0016813(hydrolase activity, acting on carbon-nitrogen (but not peptide) bonds, in linear amidines);GO:0016787(hydrolase activity);GO:0004053(arginase activity)	01230(Biosynthesis of amino acids);00330(Arginine and proline metabolism);05146(Amoebiasis)	NA	NA	Arginase-1 [Source:UniProtKB/Swiss-Prot;Acc:Q95JC8]	MSTRG.11036.1	MSTRG.11036	.	yes	novel	trans	NA	-32.83	0.984114
ENSSSCT00000004636	0	chr1	35580461	35594611	MSTRG.361	ENSSSCG00000004195	yes	GO:0005737(cytoplasm);GO:0006525(arginine metabolic process);GO:0000050(urea cycle);GO:0046872(metal ion binding);GO:0016813(hydrolase activity, acting on carbon-nitrogen (but not peptide) bonds, in linear amidines);GO:0016787(hydrolase activity);GO:0004053(arginase activity)	01230(Biosynthesis of amino acids);00330(Arginine and proline metabolism);05146(Amoebiasis)	NA	NA	Arginase-1 [Source:UniProtKB/Swiss-Prot;Acc:Q95JC8]	MSTRG.11081.1	MSTRG.11081	.	yes	novel	trans	NA	-43.31	-0.976044
ENSSSCT00000004636	0	chr1	35580461	35594611	MSTRG.361	ENSSSCG00000004195	yes	GO:0005737(cytoplasm);GO:0006525(arginine metabolic process);GO:0000050(urea cycle);GO:0046872(metal ion binding);GO:0016813(hydrolase activity, acting on carbon-nitrogen (but not peptide) bonds, in linear amidines);GO:0016787(hydrolase activity);GO:0004053(arginase activity)	01230(Biosynthesis of amino acids);00330(Arginine and proline metabolism);05146(Amoebiasis)	NA	NA	Arginase-1 [Source:UniProtKB/Swiss-Prot;Acc:Q95JC8]	MSTRG.13663.1	MSTRG.13663	.	yes	novel	trans	NA	-17.48	0.963683
ENSSSCT00000004636	0	chr1	35580461	35594611	MSTRG.361	ENSSSCG00000004195	yes	GO:0005737(cytoplasm);GO:0006525(arginine metabolic process);GO:0000050(urea cycle);GO:0046872(metal ion binding);GO:0016813(hydrolase activity, acting on carbon-nitrogen (but not peptide) bonds, in linear amidines);GO:0016787(hydrolase activity);GO:0004053(arginase activity)	01230(Biosynthesis of amino acids);00330(Arginine and proline metabolism);05146(Amoebiasis)	NA	NA	Arginase-1 [Source:UniProtKB/Swiss-Prot;Acc:Q95JC8]	MSTRG.13917.1	MSTRG.13917	.	yes	novel	trans	NA	-33.51	0.95228
ENSSSCT00000004636	0	chr1	35580461	35594611	MSTRG.361	ENSSSCG00000004195	yes	GO:0005737(cytoplasm);GO:0006525(arginine metabolic process);GO:0000050(urea cycle);GO:0046872(metal ion binding);GO:0016813(hydrolase activity, acting on carbon-nitrogen (but not peptide) bonds, in linear amidines);GO:0016787(hydrolase activity);GO:0004053(arginase activity)	01230(Biosynthesis of amino acids);00330(Arginine and proline metabolism);05146(Amoebiasis)	NA	NA	Arginase-1 [Source:UniProtKB/Swiss-Prot;Acc:Q95JC8]	MSTRG.14046.1	MSTRG.14046	.	yes	novel	trans	NA	-41.58	0.986867
ENSSSCT00000004636	0	chr1	35580461	35594611	MSTRG.361	ENSSSCG00000004195	yes	GO:0005737(cytoplasm);GO:0006525(arginine metabolic process);GO:0000050(urea cycle);GO:0046872(metal ion binding);GO:0016813(hydrolase activity, acting on carbon-nitrogen (but not peptide) bonds, in linear amidines);GO:0016787(hydrolase activity);GO:0004053(arginase activity)	01230(Biosynthesis of amino acids);00330(Arginine and proline metabolism);05146(Amoebiasis)	NA	NA	Arginase-1 [Source:UniProtKB/Swiss-Prot;Acc:Q95JC8]	MSTRG.14254.1	MSTRG.14254	.	yes	novel	trans	NA	-29.96	0.958457
ENSSSCT00000004636	0	chr1	35580461	35594611	MSTRG.361	ENSSSCG00000004195	yes	GO:0005737(cytoplasm);GO:0006525(arginine metabolic process);GO:0000050(urea cycle);GO:0046872(metal ion binding);GO:0016813(hydrolase activity, acting on carbon-nitrogen (but not peptide) bonds, in linear amidines);GO:0016787(hydrolase activity);GO:0004053(arginase activity)	01230(Biosynthesis of amino acids);00330(Arginine and proline metabolism);05146(Amoebiasis)	NA	NA	Arginase-1 [Source:UniProtKB/Swiss-Prot;Acc:Q95JC8]	MSTRG.14497.1	MSTRG.14497	.	yes	novel	trans	NA	-42.21	-0.951454
ENSSSCT00000004636	0	chr1	35580461	35594611	MSTRG.361	ENSSSCG00000004195	yes	GO:0005737(cytoplasm);GO:0006525(arginine metabolic process);GO:0000050(urea cycle);GO:0046872(metal ion binding);GO:0016813(hydrolase activity, acting on carbon-nitrogen (but not peptide) bonds, in linear amidines);GO:0016787(hydrolase activity);GO:0004053(arginase activity)	01230(Biosynthesis of amino acids);00330(Arginine and proline metabolism);05146(Amoebiasis)	NA	NA	Arginase-1 [Source:UniProtKB/Swiss-Prot;Acc:Q95JC8]	MSTRG.15360.1	MSTRG.15360	.	yes	novel	trans	NA	-14.26	-0.952334
ENSSSCT00000004636	0	chr1	35580461	35594611	MSTRG.361	ENSSSCG00000004195	yes	GO:0005737(cytoplasm);GO:0006525(arginine metabolic process);GO:0000050(urea cycle);GO:0046872(metal ion binding);GO:0016813(hydrolase activity, acting on carbon-nitrogen (but not peptide) bonds, in linear amidines);GO:0016787(hydrolase activity);GO:0004053(arginase activity)	01230(Biosynthesis of amino acids);00330(Arginine and proline metabolism);05146(Amoebiasis)	NA	NA	Arginase-1 [Source:UniProtKB/Swiss-Prot;Acc:Q95JC8]	MSTRG.15900.1	MSTRG.15900	.	yes	novel	trans	NA	-43.55	0.958295
ENSSSCT00000004636	0	chr1	35580461	35594611	MSTRG.361	ENSSSCG00000004195	yes	GO:0005737(cytoplasm);GO:0006525(arginine metabolic process);GO:0000050(urea cycle);GO:0046872(metal ion binding);GO:0016813(hydrolase activity, acting on carbon-nitrogen (but not peptide) bonds, in linear amidines);GO:0016787(hydrolase activity);GO:0004053(arginase activity)	01230(Biosynthesis of amino acids);00330(Arginine and proline metabolism);05146(Amoebiasis)	NA	NA	Arginase-1 [Source:UniProtKB/Swiss-Prot;Acc:Q95JC8]	MSTRG.16154.1	MSTRG.16154	.	yes	novel	trans	NA	-37.95	0.959695
ENSSSCT00000004636	0	chr1	35580461	35594611	MSTRG.361	ENSSSCG00000004195	yes	GO:0005737(cytoplasm);GO:0006525(arginine metabolic process);GO:0000050(urea cycle);GO:0046872(metal ion binding);GO:0016813(hydrolase activity, acting on carbon-nitrogen (but not peptide) bonds, in linear amidines);GO:0016787(hydrolase activity);GO:0004053(arginase activity)	01230(Biosynthesis of amino acids);00330(Arginine and proline metabolism);05146(Amoebiasis)	NA	NA	Arginase-1 [Source:UniProtKB/Swiss-Prot;Acc:Q95JC8]	MSTRG.16956.1	MSTRG.16956	.	yes	novel	trans	NA	-43.71	0.973533
ENSSSCT00000004636	0	chr1	35580461	35594611	MSTRG.361	ENSSSCG00000004195	yes	GO:0005737(cytoplasm);GO:0006525(arginine metabolic process);GO:0000050(urea cycle);GO:0046872(metal ion binding);GO:0016813(hydrolase activity, acting on carbon-nitrogen (but not peptide) bonds, in linear amidines);GO:0016787(hydrolase activity);GO:0004053(arginase activity)	01230(Biosynthesis of amino acids);00330(Arginine and proline metabolism);05146(Amoebiasis)	NA	NA	Arginase-1 [Source:UniProtKB/Swiss-Prot;Acc:Q95JC8]	MSTRG.17206.1	MSTRG.17206	.	yes	novel	trans	NA	-33.55	-0.959316
ENSSSCT00000004636	0	chr1	35580461	35594611	MSTRG.361	ENSSSCG00000004195	yes	GO:0005737(cytoplasm);GO:0006525(arginine metabolic process);GO:0000050(urea cycle);GO:0046872(metal ion binding);GO:0016813(hydrolase activity, acting on carbon-nitrogen (but not peptide) bonds, in linear amidines);GO:0016787(hydrolase activity);GO:0004053(arginase activity)	01230(Biosynthesis of amino acids);00330(Arginine and proline metabolism);05146(Amoebiasis)	NA	NA	Arginase-1 [Source:UniProtKB/Swiss-Prot;Acc:Q95JC8]	MSTRG.17629.1	MSTRG.17629	.	yes	novel	trans	NA	-28.92	0.9551
ENSSSCT00000004636	0	chr1	35580461	35594611	MSTRG.361	ENSSSCG00000004195	yes	GO:0005737(cytoplasm);GO:0006525(arginine metabolic process);GO:0000050(urea cycle);GO:0046872(metal ion binding);GO:0016813(hydrolase activity, acting on carbon-nitrogen (but not peptide) bonds, in linear amidines);GO:0016787(hydrolase activity);GO:0004053(arginase activity)	01230(Biosynthesis of amino acids);00330(Arginine and proline metabolism);05146(Amoebiasis)	NA	NA	Arginase-1 [Source:UniProtKB/Swiss-Prot;Acc:Q95JC8]	MSTRG.19762.1	MSTRG.19762	.	yes	novel	trans	NA	-49.63	0.950871
ENSSSCT00000004636	0	chr1	35580461	35594611	MSTRG.361	ENSSSCG00000004195	yes	GO:0005737(cytoplasm);GO:0006525(arginine metabolic process);GO:0000050(urea cycle);GO:0046872(metal ion binding);GO:0016813(hydrolase activity, acting on carbon-nitrogen (but not peptide) bonds, in linear amidines);GO:0016787(hydrolase activity);GO:0004053(arginase activity)	01230(Biosynthesis of amino acids);00330(Arginine and proline metabolism);05146(Amoebiasis)	NA	NA	Arginase-1 [Source:UniProtKB/Swiss-Prot;Acc:Q95JC8]	MSTRG.20540.1	MSTRG.20540	.	yes	novel	trans	NA	-22.83	-0.958484
ENSSSCT00000004636	0	chr1	35580461	35594611	MSTRG.361	ENSSSCG00000004195	yes	GO:0005737(cytoplasm);GO:0006525(arginine metabolic process);GO:0000050(urea cycle);GO:0046872(metal ion binding);GO:0016813(hydrolase activity, acting on carbon-nitrogen (but not peptide) bonds, in linear amidines);GO:0016787(hydrolase activity);GO:0004053(arginase activity)	01230(Biosynthesis of amino acids);00330(Arginine and proline metabolism);05146(Amoebiasis)	NA	NA	Arginase-1 [Source:UniProtKB/Swiss-Prot;Acc:Q95JC8]	MSTRG.21860.1	MSTRG.21860	.	yes	novel	trans	NA	-31.31	0.951215
ENSSSCT00000004636	0	chr1	35580461	35594611	MSTRG.361	ENSSSCG00000004195	yes	GO:0005737(cytoplasm);GO:0006525(arginine metabolic process);GO:0000050(urea cycle);GO:0046872(metal ion binding);GO:0016813(hydrolase activity, acting on carbon-nitrogen (but not peptide) bonds, in linear amidines);GO:0016787(hydrolase activity);GO:0004053(arginase activity)	01230(Biosynthesis of amino acids);00330(Arginine and proline metabolism);05146(Amoebiasis)	NA	NA	Arginase-1 [Source:UniProtKB/Swiss-Prot;Acc:Q95JC8]	MSTRG.22503.1	MSTRG.22503	CIART	yes	novel	trans	NA	-48.39	0.97473
ENSSSCT00000004636	0	chr1	35580461	35594611	MSTRG.361	ENSSSCG00000004195	yes	GO:0005737(cytoplasm);GO:0006525(arginine metabolic process);GO:0000050(urea cycle);GO:0046872(metal ion binding);GO:0016813(hydrolase activity, acting on carbon-nitrogen (but not peptide) bonds, in linear amidines);GO:0016787(hydrolase activity);GO:0004053(arginase activity)	01230(Biosynthesis of amino acids);00330(Arginine and proline metabolism);05146(Amoebiasis)	NA	NA	Arginase-1 [Source:UniProtKB/Swiss-Prot;Acc:Q95JC8]	MSTRG.23310.1	MSTRG.23310	.	yes	novel	trans	NA	-32.66	-0.958066
ENSSSCT00000004636	0	chr1	35580461	35594611	MSTRG.361	ENSSSCG00000004195	yes	GO:0005737(cytoplasm);GO:0006525(arginine metabolic process);GO:0000050(urea cycle);GO:0046872(metal ion binding);GO:0016813(hydrolase activity, acting on carbon-nitrogen (but not peptide) bonds, in linear amidines);GO:0016787(hydrolase activity);GO:0004053(arginase activity)	01230(Biosynthesis of amino acids);00330(Arginine and proline metabolism);05146(Amoebiasis)	NA	NA	Arginase-1 [Source:UniProtKB/Swiss-Prot;Acc:Q95JC8]	MSTRG.24277.1	MSTRG.24277	.	yes	novel	trans	NA	-21.43	0.993001
ENSSSCT00000004636	0	chr1	35580461	35594611	MSTRG.361	ENSSSCG00000004195	yes	GO:0005737(cytoplasm);GO:0006525(arginine metabolic process);GO:0000050(urea cycle);GO:0046872(metal ion binding);GO:0016813(hydrolase activity, acting on carbon-nitrogen (but not peptide) bonds, in linear amidines);GO:0016787(hydrolase activity);GO:0004053(arginase activity)	01230(Biosynthesis of amino acids);00330(Arginine and proline metabolism);05146(Amoebiasis)	NA	NA	Arginase-1 [Source:UniProtKB/Swiss-Prot;Acc:Q95JC8]	MSTRG.24765.1	MSTRG.24765	ACSS3	yes	novel	trans	NA	-28.10	0.962691
ENSSSCT00000004636	0	chr1	35580461	35594611	MSTRG.361	ENSSSCG00000004195	yes	GO:0005737(cytoplasm);GO:0006525(arginine metabolic process);GO:0000050(urea cycle);GO:0046872(metal ion binding);GO:0016813(hydrolase activity, acting on carbon-nitrogen (but not peptide) bonds, in linear amidines);GO:0016787(hydrolase activity);GO:0004053(arginase activity)	01230(Biosynthesis of amino acids);00330(Arginine and proline metabolism);05146(Amoebiasis)	NA	NA	Arginase-1 [Source:UniProtKB/Swiss-Prot;Acc:Q95JC8]	MSTRG.25871.1	MSTRG.25871	PIH1D1	yes	novel	trans	NA	-36.19	0.958452
ENSSSCT00000004636	0	chr1	35580461	35594611	MSTRG.361	ENSSSCG00000004195	yes	GO:0005737(cytoplasm);GO:0006525(arginine metabolic process);GO:0000050(urea cycle);GO:0046872(metal ion binding);GO:0016813(hydrolase activity, acting on carbon-nitrogen (but not peptide) bonds, in linear amidines);GO:0016787(hydrolase activity);GO:0004053(arginase activity)	01230(Biosynthesis of amino acids);00330(Arginine and proline metabolism);05146(Amoebiasis)	NA	NA	Arginase-1 [Source:UniProtKB/Swiss-Prot;Acc:Q95JC8]	MSTRG.26444.1	MSTRG.26444	.	yes	novel	trans	NA	-31.52	0.984961
ENSSSCT00000004636	0	chr1	35580461	35594611	MSTRG.361	ENSSSCG00000004195	yes	GO:0005737(cytoplasm);GO:0006525(arginine metabolic process);GO:0000050(urea cycle);GO:0046872(metal ion binding);GO:0016813(hydrolase activity, acting on carbon-nitrogen (but not peptide) bonds, in linear amidines);GO:0016787(hydrolase activity);GO:0004053(arginase activity)	01230(Biosynthesis of amino acids);00330(Arginine and proline metabolism);05146(Amoebiasis)	NA	NA	Arginase-1 [Source:UniProtKB/Swiss-Prot;Acc:Q95JC8]	MSTRG.26758.1	MSTRG.26758	ENSSSCG00000027352	yes	novel	trans	NA	-45.80	0.995527
ENSSSCT00000004636	0	chr1	35580461	35594611	MSTRG.361	ENSSSCG00000004195	yes	GO:0005737(cytoplasm);GO:0006525(arginine metabolic process);GO:0000050(urea cycle);GO:0046872(metal ion binding);GO:0016813(hydrolase activity, acting on carbon-nitrogen (but not peptide) bonds, in linear amidines);GO:0016787(hydrolase activity);GO:0004053(arginase activity)	01230(Biosynthesis of amino acids);00330(Arginine and proline metabolism);05146(Amoebiasis)	NA	NA	Arginase-1 [Source:UniProtKB/Swiss-Prot;Acc:Q95JC8]	MSTRG.27290.1	MSTRG.27290	.	yes	novel	trans	NA	-44.20	0.950556
ENSSSCT00000004636	0	chr1	35580461	35594611	MSTRG.361	ENSSSCG00000004195	yes	GO:0005737(cytoplasm);GO:0006525(arginine metabolic process);GO:0000050(urea cycle);GO:0046872(metal ion binding);GO:0016813(hydrolase activity, acting on carbon-nitrogen (but not peptide) bonds, in linear amidines);GO:0016787(hydrolase activity);GO:0004053(arginase activity)	01230(Biosynthesis of amino acids);00330(Arginine and proline metabolism);05146(Amoebiasis)	NA	NA	Arginase-1 [Source:UniProtKB/Swiss-Prot;Acc:Q95JC8]	MSTRG.27332.1	MSTRG.27332	.	yes	novel	trans	NA	-49.02	0.976119
ENSSSCT00000004636	0	chr1	35580461	35594611	MSTRG.361	ENSSSCG00000004195	yes	GO:0005737(cytoplasm);GO:0006525(arginine metabolic process);GO:0000050(urea cycle);GO:0046872(metal ion binding);GO:0016813(hydrolase activity, acting on carbon-nitrogen (but not peptide) bonds, in linear amidines);GO:0016787(hydrolase activity);GO:0004053(arginase activity)	01230(Biosynthesis of amino acids);00330(Arginine and proline metabolism);05146(Amoebiasis)	NA	NA	Arginase-1 [Source:UniProtKB/Swiss-Prot;Acc:Q95JC8]	MSTRG.27711.1	MSTRG.27711	.	yes	novel	trans	NA	-37.62	-0.984883
ENSSSCT00000004636	0	chr1	35580461	35594611	MSTRG.361	ENSSSCG00000004195	yes	GO:0005737(cytoplasm);GO:0006525(arginine metabolic process);GO:0000050(urea cycle);GO:0046872(metal ion binding);GO:0016813(hydrolase activity, acting on carbon-nitrogen (but not peptide) bonds, in linear amidines);GO:0016787(hydrolase activity);GO:0004053(arginase activity)	01230(Biosynthesis of amino acids);00330(Arginine and proline metabolism);05146(Amoebiasis)	NA	NA	Arginase-1 [Source:UniProtKB/Swiss-Prot;Acc:Q95JC8]	MSTRG.28025.1	MSTRG.28025	.	yes	novel	trans	NA	-37.43	0.978915
ENSSSCT00000004636	0	chr1	35580461	35594611	MSTRG.361	ENSSSCG00000004195	yes	GO:0005737(cytoplasm);GO:0006525(arginine metabolic process);GO:0000050(urea cycle);GO:0046872(metal ion binding);GO:0016813(hydrolase activity, acting on carbon-nitrogen (but not peptide) bonds, in linear amidines);GO:0016787(hydrolase activity);GO:0004053(arginase activity)	01230(Biosynthesis of amino acids);00330(Arginine and proline metabolism);05146(Amoebiasis)	NA	NA	Arginase-1 [Source:UniProtKB/Swiss-Prot;Acc:Q95JC8]	MSTRG.28441.1	MSTRG.28441	.	yes	novel	trans	NA	-38.73	-0.951933
ENSSSCT00000004636	0	chr1	35580461	35594611	MSTRG.361	ENSSSCG00000004195	yes	GO:0005737(cytoplasm);GO:0006525(arginine metabolic process);GO:0000050(urea cycle);GO:0046872(metal ion binding);GO:0016813(hydrolase activity, acting on carbon-nitrogen (but not peptide) bonds, in linear amidines);GO:0016787(hydrolase activity);GO:0004053(arginase activity)	01230(Biosynthesis of amino acids);00330(Arginine and proline metabolism);05146(Amoebiasis)	NA	NA	Arginase-1 [Source:UniProtKB/Swiss-Prot;Acc:Q95JC8]	MSTRG.28708.1	MSTRG.28708	.	yes	novel	trans	NA	-29.06	0.97129
ENSSSCT00000004636	0	chr1	35580461	35594611	MSTRG.361	ENSSSCG00000004195	yes	GO:0005737(cytoplasm);GO:0006525(arginine metabolic process);GO:0000050(urea cycle);GO:0046872(metal ion binding);GO:0016813(hydrolase activity, acting on carbon-nitrogen (but not peptide) bonds, in linear amidines);GO:0016787(hydrolase activity);GO:0004053(arginase activity)	01230(Biosynthesis of amino acids);00330(Arginine and proline metabolism);05146(Amoebiasis)	NA	NA	Arginase-1 [Source:UniProtKB/Swiss-Prot;Acc:Q95JC8]	MSTRG.28979.5	MSTRG.28979	SNORA79	yes	novel	trans	NA	-37.48	0.977481
ENSSSCT00000004636	0	chr1	35580461	35594611	MSTRG.361	ENSSSCG00000004195	yes	GO:0005737(cytoplasm);GO:0006525(arginine metabolic process);GO:0000050(urea cycle);GO:0046872(metal ion binding);GO:0016813(hydrolase activity, acting on carbon-nitrogen (but not peptide) bonds, in linear amidines);GO:0016787(hydrolase activity);GO:0004053(arginase activity)	01230(Biosynthesis of amino acids);00330(Arginine and proline metabolism);05146(Amoebiasis)	NA	NA	Arginase-1 [Source:UniProtKB/Swiss-Prot;Acc:Q95JC8]	MSTRG.28976.1	MSTRG.28976	.	yes	novel	trans	NA	-36.64	0.984625
ENSSSCT00000004636	0	chr1	35580461	35594611	MSTRG.361	ENSSSCG00000004195	yes	GO:0005737(cytoplasm);GO:0006525(arginine metabolic process);GO:0000050(urea cycle);GO:0046872(metal ion binding);GO:0016813(hydrolase activity, acting on carbon-nitrogen (but not peptide) bonds, in linear amidines);GO:0016787(hydrolase activity);GO:0004053(arginase activity)	01230(Biosynthesis of amino acids);00330(Arginine and proline metabolism);05146(Amoebiasis)	NA	NA	Arginase-1 [Source:UniProtKB/Swiss-Prot;Acc:Q95JC8]	MSTRG.29455.1	MSTRG.29455	ENSSSCG00000002451	yes	novel	trans	NA	-43.63	0.95898
ENSSSCT00000004636	0	chr1	35580461	35594611	MSTRG.361	ENSSSCG00000004195	yes	GO:0005737(cytoplasm);GO:0006525(arginine metabolic process);GO:0000050(urea cycle);GO:0046872(metal ion binding);GO:0016813(hydrolase activity, acting on carbon-nitrogen (but not peptide) bonds, in linear amidines);GO:0016787(hydrolase activity);GO:0004053(arginase activity)	01230(Biosynthesis of amino acids);00330(Arginine and proline metabolism);05146(Amoebiasis)	NA	NA	Arginase-1 [Source:UniProtKB/Swiss-Prot;Acc:Q95JC8]	MSTRG.30173.1	MSTRG.30173	CXCL2	yes	novel	trans	NA	-17.98	0.990606
ENSSSCT00000004636	0	chr1	35580461	35594611	MSTRG.361	ENSSSCG00000004195	yes	GO:0005737(cytoplasm);GO:0006525(arginine metabolic process);GO:0000050(urea cycle);GO:0046872(metal ion binding);GO:0016813(hydrolase activity, acting on carbon-nitrogen (but not peptide) bonds, in linear amidines);GO:0016787(hydrolase activity);GO:0004053(arginase activity)	01230(Biosynthesis of amino acids);00330(Arginine and proline metabolism);05146(Amoebiasis)	NA	NA	Arginase-1 [Source:UniProtKB/Swiss-Prot;Acc:Q95JC8]	MSTRG.30209.1	MSTRG.30209	.	yes	novel	trans	NA	-33.55	0.974361
ENSSSCT00000004636	0	chr1	35580461	35594611	MSTRG.361	ENSSSCG00000004195	yes	GO:0005737(cytoplasm);GO:0006525(arginine metabolic process);GO:0000050(urea cycle);GO:0046872(metal ion binding);GO:0016813(hydrolase activity, acting on carbon-nitrogen (but not peptide) bonds, in linear amidines);GO:0016787(hydrolase activity);GO:0004053(arginase activity)	01230(Biosynthesis of amino acids);00330(Arginine and proline metabolism);05146(Amoebiasis)	NA	NA	Arginase-1 [Source:UniProtKB/Swiss-Prot;Acc:Q95JC8]	MSTRG.30732.1	MSTRG.30732	.	yes	novel	trans	NA	-32.21	0.987753
ENSSSCT00000004636	0	chr1	35580461	35594611	MSTRG.361	ENSSSCG00000004195	yes	GO:0005737(cytoplasm);GO:0006525(arginine metabolic process);GO:0000050(urea cycle);GO:0046872(metal ion binding);GO:0016813(hydrolase activity, acting on carbon-nitrogen (but not peptide) bonds, in linear amidines);GO:0016787(hydrolase activity);GO:0004053(arginase activity)	01230(Biosynthesis of amino acids);00330(Arginine and proline metabolism);05146(Amoebiasis)	NA	NA	Arginase-1 [Source:UniProtKB/Swiss-Prot;Acc:Q95JC8]	MSTRG.31692.1	MSTRG.31692	.	yes	novel	trans	NA	-37.28	0.977518
ENSSSCT00000004636	0	chr1	35580461	35594611	MSTRG.361	ENSSSCG00000004195	yes	GO:0005737(cytoplasm);GO:0006525(arginine metabolic process);GO:0000050(urea cycle);GO:0046872(metal ion binding);GO:0016813(hydrolase activity, acting on carbon-nitrogen (but not peptide) bonds, in linear amidines);GO:0016787(hydrolase activity);GO:0004053(arginase activity)	01230(Biosynthesis of amino acids);00330(Arginine and proline metabolism);05146(Amoebiasis)	NA	NA	Arginase-1 [Source:UniProtKB/Swiss-Prot;Acc:Q95JC8]	MSTRG.31992.1	MSTRG.31992	.	yes	novel	trans	NA	-32.23	0.955246
ENSSSCT00000004646	0	chr1	37112971	37147471	MSTRG.380	ENSSSCG00000004205	yes	GO:0007165(signal transduction)	NA	NA	NA	NA	MSTRG.5076.1	MSTRG.5076	.	yes	novel	trans	NA	-26.01	0.95083
ENSSSCT00000004646	0	chr1	37112971	37147471	MSTRG.380	ENSSSCG00000004205	yes	GO:0007165(signal transduction)	NA	NA	NA	NA	MSTRG.5090.1	MSTRG.5090	ssc-mir-18a	yes	novel	trans	NA	-54.82	0.976757
ENSSSCT00000004647	0	chr1	37339067	37361360	MSTRG.383	ENSSSCG00000004206	yes	GO:0007165(signal transduction)	NA	NA	NA	NA	MSTRG.5643.1	MSTRG.5643	MYL4	yes	novel	trans	NA	-30.06	0.963579
ENSSSCT00000004647	0	chr1	37339067	37361360	MSTRG.383	ENSSSCG00000004206	yes	GO:0007165(signal transduction)	NA	NA	NA	NA	MSTRG.5813.1	MSTRG.5813	.	yes	novel	trans	NA	-41.88	0.974154
ENSSSCT00000004647	0	chr1	37339067	37361360	MSTRG.383	ENSSSCG00000004206	yes	GO:0007165(signal transduction)	NA	NA	NA	NA	MSTRG.6500.1	MSTRG.6500	.	yes	novel	trans	NA	-32.57	-0.958866
ENSSSCT00000004647	0	chr1	37339067	37361360	MSTRG.383	ENSSSCG00000004206	yes	GO:0007165(signal transduction)	NA	NA	NA	NA	MSTRG.7277.1	MSTRG.7277	.	yes	novel	trans	NA	-35.88	0.966408
ENSSSCT00000004647	0	chr1	37339067	37361360	MSTRG.383	ENSSSCG00000004206	yes	GO:0007165(signal transduction)	NA	NA	NA	NA	MSTRG.7456.1	MSTRG.7456	IL17RB	yes	novel	trans	NA	-25.55	0.955897
ENSSSCT00000004647	0	chr1	37339067	37361360	MSTRG.383	ENSSSCG00000004206	yes	GO:0007165(signal transduction)	NA	NA	NA	NA	MSTRG.9930.1	MSTRG.9930	.	yes	novel	trans	NA	-25.21	0.969291
ENSSSCT00000004647	0	chr1	37339067	37361360	MSTRG.383	ENSSSCG00000004206	yes	GO:0007165(signal transduction)	NA	NA	NA	NA	MSTRG.11081.1	MSTRG.11081	.	yes	novel	trans	NA	-29.41	0.963896
ENSSSCT00000004647	0	chr1	37339067	37361360	MSTRG.383	ENSSSCG00000004206	yes	GO:0007165(signal transduction)	NA	NA	NA	NA	MSTRG.12511.1	MSTRG.12511	.	yes	novel	trans	NA	-39.58	-0.983666
ENSSSCT00000004647	0	chr1	37339067	37361360	MSTRG.383	ENSSSCG00000004206	yes	GO:0007165(signal transduction)	NA	NA	NA	NA	MSTRG.13663.1	MSTRG.13663	.	yes	novel	trans	NA	-20.26	-0.951486
ENSSSCT00000004647	0	chr1	37339067	37361360	MSTRG.383	ENSSSCG00000004206	yes	GO:0007165(signal transduction)	NA	NA	NA	NA	MSTRG.13921.1	MSTRG.13921	.	yes	novel	trans	NA	-28.22	-0.970461
ENSSSCT00000004647	0	chr1	37339067	37361360	MSTRG.383	ENSSSCG00000004206	yes	GO:0007165(signal transduction)	NA	NA	NA	NA	MSTRG.14254.1	MSTRG.14254	.	yes	novel	trans	NA	-32.87	-0.972325
ENSSSCT00000004647	0	chr1	37339067	37361360	MSTRG.383	ENSSSCG00000004206	yes	GO:0007165(signal transduction)	NA	NA	NA	NA	MSTRG.15403.1	MSTRG.15403	.	yes	novel	trans	NA	-24.91	0.966613
ENSSSCT00000004647	0	chr1	37339067	37361360	MSTRG.383	ENSSSCG00000004206	yes	GO:0007165(signal transduction)	NA	NA	NA	NA	MSTRG.16057.1	MSTRG.16057	.	yes	novel	trans	NA	-24.21	0.983215
ENSSSCT00000004647	0	chr1	37339067	37361360	MSTRG.383	ENSSSCG00000004206	yes	GO:0007165(signal transduction)	NA	NA	NA	NA	MSTRG.16431.1	MSTRG.16431	.	yes	novel	trans	NA	-46.39	0.969112
ENSSSCT00000004647	0	chr1	37339067	37361360	MSTRG.383	ENSSSCG00000004206	yes	GO:0007165(signal transduction)	NA	NA	NA	NA	MSTRG.16579.2	MSTRG.16579	.	yes	novel	trans	NA	-46.42	-0.954919
ENSSSCT00000004647	0	chr1	37339067	37361360	MSTRG.383	ENSSSCG00000004206	yes	GO:0007165(signal transduction)	NA	NA	NA	NA	MSTRG.17206.1	MSTRG.17206	.	yes	novel	trans	NA	-22.16	0.956304
ENSSSCT00000004647	0	chr1	37339067	37361360	MSTRG.383	ENSSSCG00000004206	yes	GO:0007165(signal transduction)	NA	NA	NA	NA	MSTRG.18731.1	MSTRG.18731	ENSSSCG00000014368	yes	novel	trans	NA	-33.86	-0.990215
ENSSSCT00000004647	0	chr1	37339067	37361360	MSTRG.383	ENSSSCG00000004206	yes	GO:0007165(signal transduction)	NA	NA	NA	NA	MSTRG.19520.1	MSTRG.19520	.	yes	novel	trans	NA	-19.71	-0.991607
ENSSSCT00000004647	0	chr1	37339067	37361360	MSTRG.383	ENSSSCG00000004206	yes	GO:0007165(signal transduction)	NA	NA	NA	NA	MSTRG.19547.1	MSTRG.19547	.	yes	novel	trans	NA	-41.47	-0.971203
ENSSSCT00000004647	0	chr1	37339067	37361360	MSTRG.383	ENSSSCG00000004206	yes	GO:0007165(signal transduction)	NA	NA	NA	NA	MSTRG.19799.1	MSTRG.19799	.	yes	novel	trans	NA	-43.13	-0.974516
ENSSSCT00000004647	0	chr1	37339067	37361360	MSTRG.383	ENSSSCG00000004206	yes	GO:0007165(signal transduction)	NA	NA	NA	NA	MSTRG.21494.1	MSTRG.21494	.	yes	novel	trans	NA	-23.31	0.952839
ENSSSCT00000004647	0	chr1	37339067	37361360	MSTRG.383	ENSSSCG00000004206	yes	GO:0007165(signal transduction)	NA	NA	NA	NA	MSTRG.21860.1	MSTRG.21860	.	yes	novel	trans	NA	-23.51	-0.95942
ENSSSCT00000004647	0	chr1	37339067	37361360	MSTRG.383	ENSSSCG00000004206	yes	GO:0007165(signal transduction)	NA	NA	NA	NA	MSTRG.22198.1	MSTRG.22198	.	yes	novel	trans	NA	-23.41	-0.961627
ENSSSCT00000004647	0	chr1	37339067	37361360	MSTRG.383	ENSSSCG00000004206	yes	GO:0007165(signal transduction)	NA	NA	NA	NA	MSTRG.22576.1	MSTRG.22576	.	yes	novel	trans	NA	-33.44	-0.974231
ENSSSCT00000004647	0	chr1	37339067	37361360	MSTRG.383	ENSSSCG00000004206	yes	GO:0007165(signal transduction)	NA	NA	NA	NA	MSTRG.22782.1	MSTRG.22782	.	yes	novel	trans	NA	-31.54	-0.983783
ENSSSCT00000004647	0	chr1	37339067	37361360	MSTRG.383	ENSSSCG00000004206	yes	GO:0007165(signal transduction)	NA	NA	NA	NA	MSTRG.23177.1	MSTRG.23177	.	yes	novel	trans	NA	-33.11	-0.951441
ENSSSCT00000004647	0	chr1	37339067	37361360	MSTRG.383	ENSSSCG00000004206	yes	GO:0007165(signal transduction)	NA	NA	NA	NA	MSTRG.23881.1	MSTRG.23881	.	yes	novel	trans	NA	-22.48	-0.992864
ENSSSCT00000004647	0	chr1	37339067	37361360	MSTRG.383	ENSSSCG00000004206	yes	GO:0007165(signal transduction)	NA	NA	NA	NA	MSTRG.23953.1	MSTRG.23953	.	yes	novel	trans	NA	-34.51	-0.975801
ENSSSCT00000004647	0	chr1	37339067	37361360	MSTRG.383	ENSSSCG00000004206	yes	GO:0007165(signal transduction)	NA	NA	NA	NA	MSTRG.24330.1	MSTRG.24330	.	yes	novel	trans	NA	-27.05	-0.962398
ENSSSCT00000004647	0	chr1	37339067	37361360	MSTRG.383	ENSSSCG00000004206	yes	GO:0007165(signal transduction)	NA	NA	NA	NA	MSTRG.24605.1	MSTRG.24605	.	yes	novel	trans	NA	-32.75	-0.969608
ENSSSCT00000004647	0	chr1	37339067	37361360	MSTRG.383	ENSSSCG00000004206	yes	GO:0007165(signal transduction)	NA	NA	NA	NA	MSTRG.24654.1	MSTRG.24654	.	yes	novel	trans	NA	-37.99	-0.958989
ENSSSCT00000004647	0	chr1	37339067	37361360	MSTRG.383	ENSSSCG00000004206	yes	GO:0007165(signal transduction)	NA	NA	NA	NA	MSTRG.24723.1	MSTRG.24723	.	yes	novel	trans	NA	-22.16	-0.976575
ENSSSCT00000004647	0	chr1	37339067	37361360	MSTRG.383	ENSSSCG00000004206	yes	GO:0007165(signal transduction)	NA	NA	NA	NA	MSTRG.24850.1	MSTRG.24850	.	yes	novel	trans	NA	-23.33	-0.975596
ENSSSCT00000004647	0	chr1	37339067	37361360	MSTRG.383	ENSSSCG00000004206	yes	GO:0007165(signal transduction)	NA	NA	NA	NA	MSTRG.25058.1	MSTRG.25058	.	yes	novel	trans	NA	-33.47	-0.977994
ENSSSCT00000004647	0	chr1	37339067	37361360	MSTRG.383	ENSSSCG00000004206	yes	GO:0007165(signal transduction)	NA	NA	NA	NA	MSTRG.26049.1	MSTRG.26049	.	yes	novel	trans	NA	-18.71	0.969298
ENSSSCT00000004647	0	chr1	37339067	37361360	MSTRG.383	ENSSSCG00000004206	yes	GO:0007165(signal transduction)	NA	NA	NA	NA	MSTRG.26467.1	MSTRG.26467	.	yes	novel	trans	NA	-22.31	-0.960072
ENSSSCT00000004647	0	chr1	37339067	37361360	MSTRG.383	ENSSSCG00000004206	yes	GO:0007165(signal transduction)	NA	NA	NA	NA	MSTRG.28025.1	MSTRG.28025	.	yes	novel	trans	NA	-29.21	-0.966242
ENSSSCT00000004647	0	chr1	37339067	37361360	MSTRG.383	ENSSSCG00000004206	yes	GO:0007165(signal transduction)	NA	NA	NA	NA	MSTRG.30360.1	MSTRG.30360	.	yes	novel	trans	NA	-17.96	-0.974489
ENSSSCT00000004647	0	chr1	37339067	37361360	MSTRG.383	ENSSSCG00000004206	yes	GO:0007165(signal transduction)	NA	NA	NA	NA	MSTRG.30732.1	MSTRG.30732	.	yes	novel	trans	NA	-21.56	-0.952588
ENSSSCT00000004659	0	chr1	39565183	39593566	MSTRG.391	ENSSSCG00000004216	yes	GO:0005829(cytosol);GO:0005739(mitochondrion);GO:0008152(metabolic process);GO:0006635(fatty acid beta-oxidation);GO:0004300(enoyl-CoA hydratase activity);GO:0003824(catalytic activity)	00640(Propanoate metabolism)	NA	NA	NA	MSTRG.4146.1	MSTRG.4146	.	yes	novel	trans	NA	-42.02	0.97588
ENSSSCT00000004659	0	chr1	39565183	39593566	MSTRG.391	ENSSSCG00000004216	yes	GO:0005829(cytosol);GO:0005739(mitochondrion);GO:0008152(metabolic process);GO:0006635(fatty acid beta-oxidation);GO:0004300(enoyl-CoA hydratase activity);GO:0003824(catalytic activity)	00640(Propanoate metabolism)	NA	NA	NA	MSTRG.5643.1	MSTRG.5643	MYL4	yes	novel	trans	NA	-39.10	-0.967322
ENSSSCT00000004659	0	chr1	39565183	39593566	MSTRG.391	ENSSSCG00000004216	yes	GO:0005829(cytosol);GO:0005739(mitochondrion);GO:0008152(metabolic process);GO:0006635(fatty acid beta-oxidation);GO:0004300(enoyl-CoA hydratase activity);GO:0003824(catalytic activity)	00640(Propanoate metabolism)	NA	NA	NA	MSTRG.6301.1	MSTRG.6301	.	yes	novel	trans	NA	-72.71	0.9707
ENSSSCT00000004659	0	chr1	39565183	39593566	MSTRG.391	ENSSSCG00000004216	yes	GO:0005829(cytosol);GO:0005739(mitochondrion);GO:0008152(metabolic process);GO:0006635(fatty acid beta-oxidation);GO:0004300(enoyl-CoA hydratase activity);GO:0003824(catalytic activity)	00640(Propanoate metabolism)	NA	NA	NA	MSTRG.6500.1	MSTRG.6500	.	yes	novel	trans	NA	-44.45	0.977972
ENSSSCT00000004659	0	chr1	39565183	39593566	MSTRG.391	ENSSSCG00000004216	yes	GO:0005829(cytosol);GO:0005739(mitochondrion);GO:0008152(metabolic process);GO:0006635(fatty acid beta-oxidation);GO:0004300(enoyl-CoA hydratase activity);GO:0003824(catalytic activity)	00640(Propanoate metabolism)	NA	NA	NA	MSTRG.8882.1	MSTRG.8882	.	yes	novel	trans	NA	-46.36	-0.964256
ENSSSCT00000004659	0	chr1	39565183	39593566	MSTRG.391	ENSSSCG00000004216	yes	GO:0005829(cytosol);GO:0005739(mitochondrion);GO:0008152(metabolic process);GO:0006635(fatty acid beta-oxidation);GO:0004300(enoyl-CoA hydratase activity);GO:0003824(catalytic activity)	00640(Propanoate metabolism)	NA	NA	NA	MSTRG.9553.1	MSTRG.9553	XPO7	yes	novel	trans	NA	-25.36	-0.953659
ENSSSCT00000004659	0	chr1	39565183	39593566	MSTRG.391	ENSSSCG00000004216	yes	GO:0005829(cytosol);GO:0005739(mitochondrion);GO:0008152(metabolic process);GO:0006635(fatty acid beta-oxidation);GO:0004300(enoyl-CoA hydratase activity);GO:0003824(catalytic activity)	00640(Propanoate metabolism)	NA	NA	NA	MSTRG.11036.1	MSTRG.11036	.	yes	novel	trans	NA	-39.74	0.963253
ENSSSCT00000004659	0	chr1	39565183	39593566	MSTRG.391	ENSSSCG00000004216	yes	GO:0005829(cytosol);GO:0005739(mitochondrion);GO:0008152(metabolic process);GO:0006635(fatty acid beta-oxidation);GO:0004300(enoyl-CoA hydratase activity);GO:0003824(catalytic activity)	00640(Propanoate metabolism)	NA	NA	NA	MSTRG.11081.1	MSTRG.11081	.	yes	novel	trans	NA	-73.05	-0.961996
ENSSSCT00000004659	0	chr1	39565183	39593566	MSTRG.391	ENSSSCG00000004216	yes	GO:0005829(cytosol);GO:0005739(mitochondrion);GO:0008152(metabolic process);GO:0006635(fatty acid beta-oxidation);GO:0004300(enoyl-CoA hydratase activity);GO:0003824(catalytic activity)	00640(Propanoate metabolism)	NA	NA	NA	MSTRG.12278.1	MSTRG.12278	U6	yes	novel	trans	NA	-57.51	0.985777
ENSSSCT00000004659	0	chr1	39565183	39593566	MSTRG.391	ENSSSCG00000004216	yes	GO:0005829(cytosol);GO:0005739(mitochondrion);GO:0008152(metabolic process);GO:0006635(fatty acid beta-oxidation);GO:0004300(enoyl-CoA hydratase activity);GO:0003824(catalytic activity)	00640(Propanoate metabolism)	NA	NA	NA	MSTRG.12511.1	MSTRG.12511	.	yes	novel	trans	NA	-28.17	0.958492
ENSSSCT00000004659	0	chr1	39565183	39593566	MSTRG.391	ENSSSCG00000004216	yes	GO:0005829(cytosol);GO:0005739(mitochondrion);GO:0008152(metabolic process);GO:0006635(fatty acid beta-oxidation);GO:0004300(enoyl-CoA hydratase activity);GO:0003824(catalytic activity)	00640(Propanoate metabolism)	NA	NA	NA	MSTRG.13663.1	MSTRG.13663	.	yes	novel	trans	NA	-29.76	0.991203
ENSSSCT00000004659	0	chr1	39565183	39593566	MSTRG.391	ENSSSCG00000004216	yes	GO:0005829(cytosol);GO:0005739(mitochondrion);GO:0008152(metabolic process);GO:0006635(fatty acid beta-oxidation);GO:0004300(enoyl-CoA hydratase activity);GO:0003824(catalytic activity)	00640(Propanoate metabolism)	NA	NA	NA	MSTRG.14254.1	MSTRG.14254	.	yes	novel	trans	NA	-24.25	0.974196
ENSSSCT00000004659	0	chr1	39565183	39593566	MSTRG.391	ENSSSCG00000004216	yes	GO:0005829(cytosol);GO:0005739(mitochondrion);GO:0008152(metabolic process);GO:0006635(fatty acid beta-oxidation);GO:0004300(enoyl-CoA hydratase activity);GO:0003824(catalytic activity)	00640(Propanoate metabolism)	NA	NA	NA	MSTRG.15360.1	MSTRG.15360	.	yes	novel	trans	NA	-16.61	-0.972349
ENSSSCT00000004659	0	chr1	39565183	39593566	MSTRG.391	ENSSSCG00000004216	yes	GO:0005829(cytosol);GO:0005739(mitochondrion);GO:0008152(metabolic process);GO:0006635(fatty acid beta-oxidation);GO:0004300(enoyl-CoA hydratase activity);GO:0003824(catalytic activity)	00640(Propanoate metabolism)	NA	NA	NA	MSTRG.16154.1	MSTRG.16154	.	yes	novel	trans	NA	-25.86	0.963089
ENSSSCT00000004659	0	chr1	39565183	39593566	MSTRG.391	ENSSSCG00000004216	yes	GO:0005829(cytosol);GO:0005739(mitochondrion);GO:0008152(metabolic process);GO:0006635(fatty acid beta-oxidation);GO:0004300(enoyl-CoA hydratase activity);GO:0003824(catalytic activity)	00640(Propanoate metabolism)	NA	NA	NA	MSTRG.21582.1	MSTRG.21582	.	yes	novel	trans	NA	-31.46	0.952675
ENSSSCT00000004659	0	chr1	39565183	39593566	MSTRG.391	ENSSSCG00000004216	yes	GO:0005829(cytosol);GO:0005739(mitochondrion);GO:0008152(metabolic process);GO:0006635(fatty acid beta-oxidation);GO:0004300(enoyl-CoA hydratase activity);GO:0003824(catalytic activity)	00640(Propanoate metabolism)	NA	NA	NA	MSTRG.22198.1	MSTRG.22198	.	yes	novel	trans	NA	-42.91	0.951601
ENSSSCT00000004659	0	chr1	39565183	39593566	MSTRG.391	ENSSSCG00000004216	yes	GO:0005829(cytosol);GO:0005739(mitochondrion);GO:0008152(metabolic process);GO:0006635(fatty acid beta-oxidation);GO:0004300(enoyl-CoA hydratase activity);GO:0003824(catalytic activity)	00640(Propanoate metabolism)	NA	NA	NA	MSTRG.22503.1	MSTRG.22503	CIART	yes	novel	trans	NA	-12.61	0.990856
ENSSSCT00000004659	0	chr1	39565183	39593566	MSTRG.391	ENSSSCG00000004216	yes	GO:0005829(cytosol);GO:0005739(mitochondrion);GO:0008152(metabolic process);GO:0006635(fatty acid beta-oxidation);GO:0004300(enoyl-CoA hydratase activity);GO:0003824(catalytic activity)	00640(Propanoate metabolism)	NA	NA	NA	MSTRG.22782.1	MSTRG.22782	.	yes	novel	trans	NA	-38.80	0.958581
ENSSSCT00000004659	0	chr1	39565183	39593566	MSTRG.391	ENSSSCG00000004216	yes	GO:0005829(cytosol);GO:0005739(mitochondrion);GO:0008152(metabolic process);GO:0006635(fatty acid beta-oxidation);GO:0004300(enoyl-CoA hydratase activity);GO:0003824(catalytic activity)	00640(Propanoate metabolism)	NA	NA	NA	MSTRG.23881.1	MSTRG.23881	.	yes	novel	trans	NA	-37.07	0.951894
ENSSSCT00000004659	0	chr1	39565183	39593566	MSTRG.391	ENSSSCG00000004216	yes	GO:0005829(cytosol);GO:0005739(mitochondrion);GO:0008152(metabolic process);GO:0006635(fatty acid beta-oxidation);GO:0004300(enoyl-CoA hydratase activity);GO:0003824(catalytic activity)	00640(Propanoate metabolism)	NA	NA	NA	MSTRG.24277.1	MSTRG.24277	.	yes	novel	trans	NA	-54.82	0.962166
ENSSSCT00000004659	0	chr1	39565183	39593566	MSTRG.391	ENSSSCG00000004216	yes	GO:0005829(cytosol);GO:0005739(mitochondrion);GO:0008152(metabolic process);GO:0006635(fatty acid beta-oxidation);GO:0004300(enoyl-CoA hydratase activity);GO:0003824(catalytic activity)	00640(Propanoate metabolism)	NA	NA	NA	MSTRG.24605.1	MSTRG.24605	.	yes	novel	trans	NA	-43.49	0.950553
ENSSSCT00000004659	0	chr1	39565183	39593566	MSTRG.391	ENSSSCG00000004216	yes	GO:0005829(cytosol);GO:0005739(mitochondrion);GO:0008152(metabolic process);GO:0006635(fatty acid beta-oxidation);GO:0004300(enoyl-CoA hydratase activity);GO:0003824(catalytic activity)	00640(Propanoate metabolism)	NA	NA	NA	MSTRG.24799.1	MSTRG.24799	.	yes	novel	trans	NA	-47.73	0.958729
ENSSSCT00000004659	0	chr1	39565183	39593566	MSTRG.391	ENSSSCG00000004216	yes	GO:0005829(cytosol);GO:0005739(mitochondrion);GO:0008152(metabolic process);GO:0006635(fatty acid beta-oxidation);GO:0004300(enoyl-CoA hydratase activity);GO:0003824(catalytic activity)	00640(Propanoate metabolism)	NA	NA	NA	MSTRG.24850.1	MSTRG.24850	.	yes	novel	trans	NA	-34.53	0.963238
ENSSSCT00000004659	0	chr1	39565183	39593566	MSTRG.391	ENSSSCG00000004216	yes	GO:0005829(cytosol);GO:0005739(mitochondrion);GO:0008152(metabolic process);GO:0006635(fatty acid beta-oxidation);GO:0004300(enoyl-CoA hydratase activity);GO:0003824(catalytic activity)	00640(Propanoate metabolism)	NA	NA	NA	MSTRG.25871.1	MSTRG.25871	PIH1D1	yes	novel	trans	NA	-16.90	0.95195
ENSSSCT00000004659	0	chr1	39565183	39593566	MSTRG.391	ENSSSCG00000004216	yes	GO:0005829(cytosol);GO:0005739(mitochondrion);GO:0008152(metabolic process);GO:0006635(fatty acid beta-oxidation);GO:0004300(enoyl-CoA hydratase activity);GO:0003824(catalytic activity)	00640(Propanoate metabolism)	NA	NA	NA	MSTRG.26444.1	MSTRG.26444	.	yes	novel	trans	NA	-34.31	0.978886
ENSSSCT00000004659	0	chr1	39565183	39593566	MSTRG.391	ENSSSCG00000004216	yes	GO:0005829(cytosol);GO:0005739(mitochondrion);GO:0008152(metabolic process);GO:0006635(fatty acid beta-oxidation);GO:0004300(enoyl-CoA hydratase activity);GO:0003824(catalytic activity)	00640(Propanoate metabolism)	NA	NA	NA	MSTRG.27711.1	MSTRG.27711	.	yes	novel	trans	NA	-22.78	-0.972276
ENSSSCT00000004659	0	chr1	39565183	39593566	MSTRG.391	ENSSSCG00000004216	yes	GO:0005829(cytosol);GO:0005739(mitochondrion);GO:0008152(metabolic process);GO:0006635(fatty acid beta-oxidation);GO:0004300(enoyl-CoA hydratase activity);GO:0003824(catalytic activity)	00640(Propanoate metabolism)	NA	NA	NA	MSTRG.28025.1	MSTRG.28025	.	yes	novel	trans	NA	-59.68	0.973033
ENSSSCT00000004659	0	chr1	39565183	39593566	MSTRG.391	ENSSSCG00000004216	yes	GO:0005829(cytosol);GO:0005739(mitochondrion);GO:0008152(metabolic process);GO:0006635(fatty acid beta-oxidation);GO:0004300(enoyl-CoA hydratase activity);GO:0003824(catalytic activity)	00640(Propanoate metabolism)	NA	NA	NA	MSTRG.28740.1	MSTRG.28740	.	yes	novel	trans	NA	-41.36	-0.956617
ENSSSCT00000004659	0	chr1	39565183	39593566	MSTRG.391	ENSSSCG00000004216	yes	GO:0005829(cytosol);GO:0005739(mitochondrion);GO:0008152(metabolic process);GO:0006635(fatty acid beta-oxidation);GO:0004300(enoyl-CoA hydratase activity);GO:0003824(catalytic activity)	00640(Propanoate metabolism)	NA	NA	NA	MSTRG.29455.1	MSTRG.29455	ENSSSCG00000002451	yes	novel	trans	NA	-35.18	0.985122
ENSSSCT00000004659	0	chr1	39565183	39593566	MSTRG.391	ENSSSCG00000004216	yes	GO:0005829(cytosol);GO:0005739(mitochondrion);GO:0008152(metabolic process);GO:0006635(fatty acid beta-oxidation);GO:0004300(enoyl-CoA hydratase activity);GO:0003824(catalytic activity)	00640(Propanoate metabolism)	NA	NA	NA	MSTRG.30209.1	MSTRG.30209	.	yes	novel	trans	NA	-20.15	0.983073
ENSSSCT00000004659	0	chr1	39565183	39593566	MSTRG.391	ENSSSCG00000004216	yes	GO:0005829(cytosol);GO:0005739(mitochondrion);GO:0008152(metabolic process);GO:0006635(fatty acid beta-oxidation);GO:0004300(enoyl-CoA hydratase activity);GO:0003824(catalytic activity)	00640(Propanoate metabolism)	NA	NA	NA	MSTRG.30732.1	MSTRG.30732	.	yes	novel	trans	NA	-24.36	0.976936
ENSSSCT00000004702	0	chr1	49645872	49695083	MSTRG.440	DCBLD1	yes	GO:0016021(integral component of membrane);GO:0016020(membrane);GO:0070492(oligosaccharide binding)	NA	NA	NA	discoidin, CUB and LCCL domain containing 1 [Source:HGNC Symbol;Acc:HGNC:21479]	MSTRG.4625.3	MSTRG.4625	.	yes	novel	trans	NA	-40.47	-0.966249
ENSSSCT00000004702	0	chr1	49645872	49695083	MSTRG.440	DCBLD1	yes	GO:0016021(integral component of membrane);GO:0016020(membrane);GO:0070492(oligosaccharide binding)	NA	NA	NA	discoidin, CUB and LCCL domain containing 1 [Source:HGNC Symbol;Acc:HGNC:21479]	MSTRG.6500.1	MSTRG.6500	.	yes	novel	trans	NA	-21.91	-0.963532
ENSSSCT00000004702	0	chr1	49645872	49695083	MSTRG.440	DCBLD1	yes	GO:0016021(integral component of membrane);GO:0016020(membrane);GO:0070492(oligosaccharide binding)	NA	NA	NA	discoidin, CUB and LCCL domain containing 1 [Source:HGNC Symbol;Acc:HGNC:21479]	MSTRG.8436.1	MSTRG.8436	.	yes	novel	trans	NA	-27.77	-0.951642
ENSSSCT00000004702	0	chr1	49645872	49695083	MSTRG.440	DCBLD1	yes	GO:0016021(integral component of membrane);GO:0016020(membrane);GO:0070492(oligosaccharide binding)	NA	NA	NA	discoidin, CUB and LCCL domain containing 1 [Source:HGNC Symbol;Acc:HGNC:21479]	MSTRG.8882.1	MSTRG.8882	.	yes	novel	trans	NA	-36.26	0.989249
ENSSSCT00000004702	0	chr1	49645872	49695083	MSTRG.440	DCBLD1	yes	GO:0016021(integral component of membrane);GO:0016020(membrane);GO:0070492(oligosaccharide binding)	NA	NA	NA	discoidin, CUB and LCCL domain containing 1 [Source:HGNC Symbol;Acc:HGNC:21479]	MSTRG.9080.1	MSTRG.9080	.	yes	novel	trans	NA	-20.21	-0.983652
ENSSSCT00000004702	0	chr1	49645872	49695083	MSTRG.440	DCBLD1	yes	GO:0016021(integral component of membrane);GO:0016020(membrane);GO:0070492(oligosaccharide binding)	NA	NA	NA	discoidin, CUB and LCCL domain containing 1 [Source:HGNC Symbol;Acc:HGNC:21479]	MSTRG.11250.1	MSTRG.11250	.	yes	novel	trans	NA	-41.06	0.955783
ENSSSCT00000004702	0	chr1	49645872	49695083	MSTRG.440	DCBLD1	yes	GO:0016021(integral component of membrane);GO:0016020(membrane);GO:0070492(oligosaccharide binding)	NA	NA	NA	discoidin, CUB and LCCL domain containing 1 [Source:HGNC Symbol;Acc:HGNC:21479]	MSTRG.11777.1	MSTRG.11777	.	yes	novel	trans	NA	-43.04	-0.977101
ENSSSCT00000004702	0	chr1	49645872	49695083	MSTRG.440	DCBLD1	yes	GO:0016021(integral component of membrane);GO:0016020(membrane);GO:0070492(oligosaccharide binding)	NA	NA	NA	discoidin, CUB and LCCL domain containing 1 [Source:HGNC Symbol;Acc:HGNC:21479]	MSTRG.13917.1	MSTRG.13917	.	yes	novel	trans	NA	-47.31	-0.954597
ENSSSCT00000004702	0	chr1	49645872	49695083	MSTRG.440	DCBLD1	yes	GO:0016021(integral component of membrane);GO:0016020(membrane);GO:0070492(oligosaccharide binding)	NA	NA	NA	discoidin, CUB and LCCL domain containing 1 [Source:HGNC Symbol;Acc:HGNC:21479]	MSTRG.15360.1	MSTRG.15360	.	yes	novel	trans	NA	-45.44	0.989513
ENSSSCT00000004702	0	chr1	49645872	49695083	MSTRG.440	DCBLD1	yes	GO:0016021(integral component of membrane);GO:0016020(membrane);GO:0070492(oligosaccharide binding)	NA	NA	NA	discoidin, CUB and LCCL domain containing 1 [Source:HGNC Symbol;Acc:HGNC:21479]	MSTRG.16681.1	MSTRG.16681	.	yes	novel	trans	NA	-17.11	-0.95694
ENSSSCT00000004702	0	chr1	49645872	49695083	MSTRG.440	DCBLD1	yes	GO:0016021(integral component of membrane);GO:0016020(membrane);GO:0070492(oligosaccharide binding)	NA	NA	NA	discoidin, CUB and LCCL domain containing 1 [Source:HGNC Symbol;Acc:HGNC:21479]	MSTRG.19762.1	MSTRG.19762	.	yes	novel	trans	NA	-44.68	-0.959702
ENSSSCT00000004702	0	chr1	49645872	49695083	MSTRG.440	DCBLD1	yes	GO:0016021(integral component of membrane);GO:0016020(membrane);GO:0070492(oligosaccharide binding)	NA	NA	NA	discoidin, CUB and LCCL domain containing 1 [Source:HGNC Symbol;Acc:HGNC:21479]	MSTRG.21596.1	MSTRG.21596	.	yes	novel	trans	NA	-41.54	-0.970908
ENSSSCT00000004702	0	chr1	49645872	49695083	MSTRG.440	DCBLD1	yes	GO:0016021(integral component of membrane);GO:0016020(membrane);GO:0070492(oligosaccharide binding)	NA	NA	NA	discoidin, CUB and LCCL domain containing 1 [Source:HGNC Symbol;Acc:HGNC:21479]	MSTRG.21860.1	MSTRG.21860	.	yes	novel	trans	NA	-38.24	-0.958347
ENSSSCT00000004702	0	chr1	49645872	49695083	MSTRG.440	DCBLD1	yes	GO:0016021(integral component of membrane);GO:0016020(membrane);GO:0070492(oligosaccharide binding)	NA	NA	NA	discoidin, CUB and LCCL domain containing 1 [Source:HGNC Symbol;Acc:HGNC:21479]	MSTRG.22657.1	MSTRG.22657	IGSF3	yes	novel	trans	NA	-52.33	-0.96522
ENSSSCT00000004702	0	chr1	49645872	49695083	MSTRG.440	DCBLD1	yes	GO:0016021(integral component of membrane);GO:0016020(membrane);GO:0070492(oligosaccharide binding)	NA	NA	NA	discoidin, CUB and LCCL domain containing 1 [Source:HGNC Symbol;Acc:HGNC:21479]	MSTRG.24277.1	MSTRG.24277	.	yes	novel	trans	NA	-27.96	-0.959998
ENSSSCT00000004702	0	chr1	49645872	49695083	MSTRG.440	DCBLD1	yes	GO:0016021(integral component of membrane);GO:0016020(membrane);GO:0070492(oligosaccharide binding)	NA	NA	NA	discoidin, CUB and LCCL domain containing 1 [Source:HGNC Symbol;Acc:HGNC:21479]	MSTRG.24799.1	MSTRG.24799	.	yes	novel	trans	NA	-43.49	-0.98483
ENSSSCT00000004702	0	chr1	49645872	49695083	MSTRG.440	DCBLD1	yes	GO:0016021(integral component of membrane);GO:0016020(membrane);GO:0070492(oligosaccharide binding)	NA	NA	NA	discoidin, CUB and LCCL domain containing 1 [Source:HGNC Symbol;Acc:HGNC:21479]	MSTRG.26559.1	MSTRG.26559	.	yes	novel	trans	NA	-50.80	-0.975519
ENSSSCT00000004702	0	chr1	49645872	49695083	MSTRG.440	DCBLD1	yes	GO:0016021(integral component of membrane);GO:0016020(membrane);GO:0070492(oligosaccharide binding)	NA	NA	NA	discoidin, CUB and LCCL domain containing 1 [Source:HGNC Symbol;Acc:HGNC:21479]	MSTRG.27332.1	MSTRG.27332	.	yes	novel	trans	NA	-41.63	-0.969531
ENSSSCT00000004702	0	chr1	49645872	49695083	MSTRG.440	DCBLD1	yes	GO:0016021(integral component of membrane);GO:0016020(membrane);GO:0070492(oligosaccharide binding)	NA	NA	NA	discoidin, CUB and LCCL domain containing 1 [Source:HGNC Symbol;Acc:HGNC:21479]	MSTRG.27711.1	MSTRG.27711	.	yes	novel	trans	NA	-37.44	0.98129
ENSSSCT00000004702	0	chr1	49645872	49695083	MSTRG.440	DCBLD1	yes	GO:0016021(integral component of membrane);GO:0016020(membrane);GO:0070492(oligosaccharide binding)	NA	NA	NA	discoidin, CUB and LCCL domain containing 1 [Source:HGNC Symbol;Acc:HGNC:21479]	MSTRG.28708.1	MSTRG.28708	.	yes	novel	trans	NA	-38.32	-0.969208
ENSSSCT00000004702	0	chr1	49645872	49695083	MSTRG.440	DCBLD1	yes	GO:0016021(integral component of membrane);GO:0016020(membrane);GO:0070492(oligosaccharide binding)	NA	NA	NA	discoidin, CUB and LCCL domain containing 1 [Source:HGNC Symbol;Acc:HGNC:21479]	MSTRG.28976.1	MSTRG.28976	.	yes	novel	trans	NA	-38.65	-0.958794
ENSSSCT00000004702	0	chr1	49645872	49695083	MSTRG.440	DCBLD1	yes	GO:0016021(integral component of membrane);GO:0016020(membrane);GO:0070492(oligosaccharide binding)	NA	NA	NA	discoidin, CUB and LCCL domain containing 1 [Source:HGNC Symbol;Acc:HGNC:21479]	MSTRG.29455.1	MSTRG.29455	ENSSSCG00000002451	yes	novel	trans	NA	-28.73	-0.967451
ENSSSCT00000004702	0	chr1	49645872	49695083	MSTRG.440	DCBLD1	yes	GO:0016021(integral component of membrane);GO:0016020(membrane);GO:0070492(oligosaccharide binding)	NA	NA	NA	discoidin, CUB and LCCL domain containing 1 [Source:HGNC Symbol;Acc:HGNC:21479]	MSTRG.30173.1	MSTRG.30173	CXCL2	yes	novel	trans	NA	-31.67	-0.970607
ENSSSCT00000004702	0	chr1	49645872	49695083	MSTRG.440	DCBLD1	yes	GO:0016021(integral component of membrane);GO:0016020(membrane);GO:0070492(oligosaccharide binding)	NA	NA	NA	discoidin, CUB and LCCL domain containing 1 [Source:HGNC Symbol;Acc:HGNC:21479]	MSTRG.31992.1	MSTRG.31992	.	yes	novel	trans	NA	-32.79	-0.960691
ENSSSCT00000004702	0	chr1	49645872	49695083	MSTRG.440	DCBLD1	yes	GO:0016021(integral component of membrane);GO:0016020(membrane);GO:0070492(oligosaccharide binding)	NA	NA	NA	discoidin, CUB and LCCL domain containing 1 [Source:HGNC Symbol;Acc:HGNC:21479]	MSTRG.32294.1	MSTRG.32294	.	yes	novel	trans	NA	-38.69	-0.953637
ENSSSCT00000020730	0	chr1	61061228	61061297	MSTRG.508	SNORD50	yes	NA	NA	NA	NA	Small nucleolar RNA SNORD50 [Source:RFAM;Acc:RF00278]	MSTRG.9930.1	MSTRG.9930	.	yes	novel	trans	NA	-16.01	0.957557
ENSSSCT00000020730	0	chr1	61061228	61061297	MSTRG.508	SNORD50	yes	NA	NA	NA	NA	Small nucleolar RNA SNORD50 [Source:RFAM;Acc:RF00278]	MSTRG.13921.1	MSTRG.13921	.	yes	novel	trans	NA	-14.36	-0.961759
ENSSSCT00000020730	0	chr1	61061228	61061297	MSTRG.508	SNORD50	yes	NA	NA	NA	NA	Small nucleolar RNA SNORD50 [Source:RFAM;Acc:RF00278]	MSTRG.15403.1	MSTRG.15403	.	yes	novel	trans	NA	-13.06	0.97334
ENSSSCT00000020730	0	chr1	61061228	61061297	MSTRG.508	SNORD50	yes	NA	NA	NA	NA	Small nucleolar RNA SNORD50 [Source:RFAM;Acc:RF00278]	MSTRG.15649.1	MSTRG.15649	.	yes	novel	trans	NA	-14.41	0.963091
ENSSSCT00000020730	0	chr1	61061228	61061297	MSTRG.508	SNORD50	yes	NA	NA	NA	NA	Small nucleolar RNA SNORD50 [Source:RFAM;Acc:RF00278]	MSTRG.25014.1	MSTRG.25014	ADAT1	yes	novel	trans	NA	-13.36	0.955175
ENSSSCT00000020730	0	chr1	61061228	61061297	MSTRG.508	SNORD50	yes	NA	NA	NA	NA	Small nucleolar RNA SNORD50 [Source:RFAM;Acc:RF00278]	MSTRG.32620.1	MSTRG.32620	.	yes	novel	trans	NA	-12.21	0.971447
ENSSSCT00000004805	0	chr1	74938600	74948564	MSTRG.589	ENSSSCG00000004348	yes	NA	NA	NA	NA	NA	MSTRG.4842.1	MSTRG.4842	.	yes	novel	trans	NA	-36.23	-0.961182
ENSSSCT00000004805	0	chr1	74938600	74948564	MSTRG.589	ENSSSCG00000004348	yes	NA	NA	NA	NA	NA	MSTRG.5484.1	MSTRG.5484	.	yes	novel	trans	NA	-48.45	0.965658
ENSSSCT00000004805	0	chr1	74938600	74948564	MSTRG.589	ENSSSCG00000004348	yes	NA	NA	NA	NA	NA	MSTRG.5619.1	MSTRG.5619	.	yes	novel	trans	NA	-43.36	-0.974553
ENSSSCT00000004805	0	chr1	74938600	74948564	MSTRG.589	ENSSSCG00000004348	yes	NA	NA	NA	NA	NA	MSTRG.6091.1	MSTRG.6091	U3	yes	novel	trans	NA	-18.39	0.993403
ENSSSCT00000004805	0	chr1	74938600	74948564	MSTRG.589	ENSSSCG00000004348	yes	NA	NA	NA	NA	NA	MSTRG.7078.1	MSTRG.7078	.	yes	novel	trans	NA	-48.99	0.968695
ENSSSCT00000004805	0	chr1	74938600	74948564	MSTRG.589	ENSSSCG00000004348	yes	NA	NA	NA	NA	NA	MSTRG.8889.1	MSTRG.8889	.	yes	novel	trans	NA	-29.26	0.954053
ENSSSCT00000004805	0	chr1	74938600	74948564	MSTRG.589	ENSSSCG00000004348	yes	NA	NA	NA	NA	NA	MSTRG.10833.1	MSTRG.10833	.	yes	novel	trans	NA	-44.38	-0.987
ENSSSCT00000004805	0	chr1	74938600	74948564	MSTRG.589	ENSSSCG00000004348	yes	NA	NA	NA	NA	NA	MSTRG.13953.1	MSTRG.13953	.	yes	novel	trans	NA	-38.73	-0.995565
ENSSSCT00000004805	0	chr1	74938600	74948564	MSTRG.589	ENSSSCG00000004348	yes	NA	NA	NA	NA	NA	MSTRG.18208.1	MSTRG.18208	.	yes	novel	trans	NA	-42.15	-0.966823
ENSSSCT00000004805	0	chr1	74938600	74948564	MSTRG.589	ENSSSCG00000004348	yes	NA	NA	NA	NA	NA	MSTRG.20904.1	MSTRG.20904	.	yes	novel	trans	NA	-35.37	0.969919
ENSSSCT00000004805	0	chr1	74938600	74948564	MSTRG.589	ENSSSCG00000004348	yes	NA	NA	NA	NA	NA	MSTRG.21416.1	MSTRG.21416	MTSS1	yes	novel	trans	NA	-28.17	0.986678
ENSSSCT00000004805	0	chr1	74938600	74948564	MSTRG.589	ENSSSCG00000004348	yes	NA	NA	NA	NA	NA	MSTRG.21803.1	MSTRG.21803	.	yes	novel	trans	NA	-25.59	-0.950659
ENSSSCT00000004805	0	chr1	74938600	74948564	MSTRG.589	ENSSSCG00000004348	yes	NA	NA	NA	NA	NA	MSTRG.24958.1	MSTRG.24958	.	yes	novel	trans	NA	-32.86	-0.955402
ENSSSCT00000004805	0	chr1	74938600	74948564	MSTRG.589	ENSSSCG00000004348	yes	NA	NA	NA	NA	NA	MSTRG.25252.1	MSTRG.25252	.	yes	novel	trans	NA	-41.27	0.994911
ENSSSCT00000004805	0	chr1	74938600	74948564	MSTRG.589	ENSSSCG00000004348	yes	NA	NA	NA	NA	NA	MSTRG.29060.1	MSTRG.29060	.	yes	novel	trans	NA	-33.33	0.996752
ENSSSCT00000004805	0	chr1	74938600	74948564	MSTRG.589	ENSSSCG00000004348	yes	NA	NA	NA	NA	NA	MSTRG.29634.1	MSTRG.29634	.	yes	novel	trans	NA	-39.21	0.991454
ENSSSCT00000004805	0	chr1	74938600	74948564	MSTRG.589	ENSSSCG00000004348	yes	NA	NA	NA	NA	NA	MSTRG.32294.1	MSTRG.32294	.	yes	novel	trans	NA	-28.76	-0.960637
ENSSSCT00000036499	0	chr1	82268709	82273291	MSTRG.641	ENSSSCG00000031023	yes	GO:0060170(ciliary membrane);GO:0045202(synapse);GO:0045121(membrane raft);GO:0031528(microvillus membrane);GO:0031362(anchored component of external side of plasma membrane);GO:0016020(membrane);GO:0009986(cell surface);GO:0009897(external side of plasma membrane);GO:0005886(plasma membrane);GO:0005622(intracellular);GO:0097190(apoptotic signaling pathway);GO:0050850(positive regulation of calci…	NA	NA	NA	NA	MSTRG.4344.1	MSTRG.4344	.	yes	novel	trans	NA	-40.31	0.961631
ENSSSCT00000036499	0	chr1	82268709	82273291	MSTRG.641	ENSSSCG00000031023	yes	GO:0060170(ciliary membrane);GO:0045202(synapse);GO:0045121(membrane raft);GO:0031528(microvillus membrane);GO:0031362(anchored component of external side of plasma membrane);GO:0016020(membrane);GO:0009986(cell surface);GO:0009897(external side of plasma membrane);GO:0005886(plasma membrane);GO:0005622(intracellular);GO:0097190(apoptotic signaling pathway);GO:0050850(positive regulation of calci…	NA	NA	NA	NA	MSTRG.5076.1	MSTRG.5076	.	yes	novel	trans	NA	-23.66	0.992988
ENSSSCT00000036499	0	chr1	82268709	82273291	MSTRG.641	ENSSSCG00000031023	yes	GO:0060170(ciliary membrane);GO:0045202(synapse);GO:0045121(membrane raft);GO:0031528(microvillus membrane);GO:0031362(anchored component of external side of plasma membrane);GO:0016020(membrane);GO:0009986(cell surface);GO:0009897(external side of plasma membrane);GO:0005886(plasma membrane);GO:0005622(intracellular);GO:0097190(apoptotic signaling pathway);GO:0050850(positive regulation of calci…	NA	NA	NA	NA	MSTRG.7277.1	MSTRG.7277	.	yes	novel	trans	NA	-38.51	0.957357
ENSSSCT00000036499	0	chr1	82268709	82273291	MSTRG.641	ENSSSCG00000031023	yes	GO:0060170(ciliary membrane);GO:0045202(synapse);GO:0045121(membrane raft);GO:0031528(microvillus membrane);GO:0031362(anchored component of external side of plasma membrane);GO:0016020(membrane);GO:0009986(cell surface);GO:0009897(external side of plasma membrane);GO:0005886(plasma membrane);GO:0005622(intracellular);GO:0097190(apoptotic signaling pathway);GO:0050850(positive regulation of calci…	NA	NA	NA	NA	MSTRG.7456.1	MSTRG.7456	IL17RB	yes	novel	trans	NA	-41.75	0.950826
ENSSSCT00000036499	0	chr1	82268709	82273291	MSTRG.641	ENSSSCG00000031023	yes	GO:0060170(ciliary membrane);GO:0045202(synapse);GO:0045121(membrane raft);GO:0031528(microvillus membrane);GO:0031362(anchored component of external side of plasma membrane);GO:0016020(membrane);GO:0009986(cell surface);GO:0009897(external side of plasma membrane);GO:0005886(plasma membrane);GO:0005622(intracellular);GO:0097190(apoptotic signaling pathway);GO:0050850(positive regulation of calci…	NA	NA	NA	NA	MSTRG.8860.1	MSTRG.8860	LRCH3	yes	novel	trans	NA	-38.87	0.979364
ENSSSCT00000036499	0	chr1	82268709	82273291	MSTRG.641	ENSSSCG00000031023	yes	GO:0060170(ciliary membrane);GO:0045202(synapse);GO:0045121(membrane raft);GO:0031528(microvillus membrane);GO:0031362(anchored component of external side of plasma membrane);GO:0016020(membrane);GO:0009986(cell surface);GO:0009897(external side of plasma membrane);GO:0005886(plasma membrane);GO:0005622(intracellular);GO:0097190(apoptotic signaling pathway);GO:0050850(positive regulation of calci…	NA	NA	NA	NA	MSTRG.9166.1	MSTRG.9166	ENSSSCG00000011977	yes	novel	trans	NA	-33.95	0.984965
ENSSSCT00000036499	0	chr1	82268709	82273291	MSTRG.641	ENSSSCG00000031023	yes	GO:0060170(ciliary membrane);GO:0045202(synapse);GO:0045121(membrane raft);GO:0031528(microvillus membrane);GO:0031362(anchored component of external side of plasma membrane);GO:0016020(membrane);GO:0009986(cell surface);GO:0009897(external side of plasma membrane);GO:0005886(plasma membrane);GO:0005622(intracellular);GO:0097190(apoptotic signaling pathway);GO:0050850(positive regulation of calci…	NA	NA	NA	NA	MSTRG.11883.1	MSTRG.11883	ENSSSCG00000015692	yes	novel	trans	NA	-35.50	0.969821
ENSSSCT00000036499	0	chr1	82268709	82273291	MSTRG.641	ENSSSCG00000031023	yes	GO:0060170(ciliary membrane);GO:0045202(synapse);GO:0045121(membrane raft);GO:0031528(microvillus membrane);GO:0031362(anchored component of external side of plasma membrane);GO:0016020(membrane);GO:0009986(cell surface);GO:0009897(external side of plasma membrane);GO:0005886(plasma membrane);GO:0005622(intracellular);GO:0097190(apoptotic signaling pathway);GO:0050850(positive regulation of calci…	NA	NA	NA	NA	MSTRG.12429.1	MSTRG.12429	ENSSSCG00000015878	yes	novel	trans	NA	-32.34	0.986482
ENSSSCT00000036499	0	chr1	82268709	82273291	MSTRG.641	ENSSSCG00000031023	yes	GO:0060170(ciliary membrane);GO:0045202(synapse);GO:0045121(membrane raft);GO:0031528(microvillus membrane);GO:0031362(anchored component of external side of plasma membrane);GO:0016020(membrane);GO:0009986(cell surface);GO:0009897(external side of plasma membrane);GO:0005886(plasma membrane);GO:0005622(intracellular);GO:0097190(apoptotic signaling pathway);GO:0050850(positive regulation of calci…	NA	NA	NA	NA	MSTRG.15649.1	MSTRG.15649	.	yes	novel	trans	NA	-38.82	0.988912
ENSSSCT00000036499	0	chr1	82268709	82273291	MSTRG.641	ENSSSCG00000031023	yes	GO:0060170(ciliary membrane);GO:0045202(synapse);GO:0045121(membrane raft);GO:0031528(microvillus membrane);GO:0031362(anchored component of external side of plasma membrane);GO:0016020(membrane);GO:0009986(cell surface);GO:0009897(external side of plasma membrane);GO:0005886(plasma membrane);GO:0005622(intracellular);GO:0097190(apoptotic signaling pathway);GO:0050850(positive regulation of calci…	NA	NA	NA	NA	MSTRG.15971.1	MSTRG.15971	.	yes	novel	trans	NA	-28.98	0.992169
ENSSSCT00000036499	0	chr1	82268709	82273291	MSTRG.641	ENSSSCG00000031023	yes	GO:0060170(ciliary membrane);GO:0045202(synapse);GO:0045121(membrane raft);GO:0031528(microvillus membrane);GO:0031362(anchored component of external side of plasma membrane);GO:0016020(membrane);GO:0009986(cell surface);GO:0009897(external side of plasma membrane);GO:0005886(plasma membrane);GO:0005622(intracellular);GO:0097190(apoptotic signaling pathway);GO:0050850(positive regulation of calci…	NA	NA	NA	NA	MSTRG.17488.1	MSTRG.17488	ZNF791	yes	novel	trans	NA	-14.49	0.987465
ENSSSCT00000036499	0	chr1	82268709	82273291	MSTRG.641	ENSSSCG00000031023	yes	GO:0060170(ciliary membrane);GO:0045202(synapse);GO:0045121(membrane raft);GO:0031528(microvillus membrane);GO:0031362(anchored component of external side of plasma membrane);GO:0016020(membrane);GO:0009986(cell surface);GO:0009897(external side of plasma membrane);GO:0005886(plasma membrane);GO:0005622(intracellular);GO:0097190(apoptotic signaling pathway);GO:0050850(positive regulation of calci…	NA	NA	NA	NA	MSTRG.20655.1	MSTRG.20655	.	yes	novel	trans	NA	-28.55	0.995564
ENSSSCT00000036499	0	chr1	82268709	82273291	MSTRG.641	ENSSSCG00000031023	yes	GO:0060170(ciliary membrane);GO:0045202(synapse);GO:0045121(membrane raft);GO:0031528(microvillus membrane);GO:0031362(anchored component of external side of plasma membrane);GO:0016020(membrane);GO:0009986(cell surface);GO:0009897(external side of plasma membrane);GO:0005886(plasma membrane);GO:0005622(intracellular);GO:0097190(apoptotic signaling pathway);GO:0050850(positive regulation of calci…	NA	NA	NA	NA	MSTRG.21494.1	MSTRG.21494	.	yes	novel	trans	NA	-30.86	0.956272
ENSSSCT00000036499	0	chr1	82268709	82273291	MSTRG.641	ENSSSCG00000031023	yes	GO:0060170(ciliary membrane);GO:0045202(synapse);GO:0045121(membrane raft);GO:0031528(microvillus membrane);GO:0031362(anchored component of external side of plasma membrane);GO:0016020(membrane);GO:0009986(cell surface);GO:0009897(external side of plasma membrane);GO:0005886(plasma membrane);GO:0005622(intracellular);GO:0097190(apoptotic signaling pathway);GO:0050850(positive regulation of calci…	NA	NA	NA	NA	MSTRG.23310.1	MSTRG.23310	.	yes	novel	trans	NA	-26.56	0.952169
ENSSSCT00000036499	0	chr1	82268709	82273291	MSTRG.641	ENSSSCG00000031023	yes	GO:0060170(ciliary membrane);GO:0045202(synapse);GO:0045121(membrane raft);GO:0031528(microvillus membrane);GO:0031362(anchored component of external side of plasma membrane);GO:0016020(membrane);GO:0009986(cell surface);GO:0009897(external side of plasma membrane);GO:0005886(plasma membrane);GO:0005622(intracellular);GO:0097190(apoptotic signaling pathway);GO:0050850(positive regulation of calci…	NA	NA	NA	NA	MSTRG.25014.1	MSTRG.25014	ADAT1	yes	novel	trans	NA	-49.38	0.990912
ENSSSCT00000036499	0	chr1	82268709	82273291	MSTRG.641	ENSSSCG00000031023	yes	GO:0060170(ciliary membrane);GO:0045202(synapse);GO:0045121(membrane raft);GO:0031528(microvillus membrane);GO:0031362(anchored component of external side of plasma membrane);GO:0016020(membrane);GO:0009986(cell surface);GO:0009897(external side of plasma membrane);GO:0005886(plasma membrane);GO:0005622(intracellular);GO:0097190(apoptotic signaling pathway);GO:0050850(positive regulation of calci…	NA	NA	NA	NA	MSTRG.26042.1	MSTRG.26042	.	yes	novel	trans	NA	-31.64	0.958292
ENSSSCT00000036499	0	chr1	82268709	82273291	MSTRG.641	ENSSSCG00000031023	yes	GO:0060170(ciliary membrane);GO:0045202(synapse);GO:0045121(membrane raft);GO:0031528(microvillus membrane);GO:0031362(anchored component of external side of plasma membrane);GO:0016020(membrane);GO:0009986(cell surface);GO:0009897(external side of plasma membrane);GO:0005886(plasma membrane);GO:0005622(intracellular);GO:0097190(apoptotic signaling pathway);GO:0050850(positive regulation of calci…	NA	NA	NA	NA	MSTRG.32620.1	MSTRG.32620	.	yes	novel	trans	NA	-31.17	0.990662
ENSSSCT00000004877	0	chr1	84719535	84735860	MSTRG.695	CD164	yes	GO:0016021(integral component of membrane);GO:0016020(membrane);GO:0005886(plasma membrane);GO:0005768(endosome);GO:0005764(lysosome);GO:0007157(heterophilic cell-cell adhesion via plasma membrane cell adhesion molecules);GO:0007155(cell adhesion)	04142(Lysosome)	K06546	NA	CD164 molecule [Source:HGNC Symbol;Acc:HGNC:1632]	MSTRG.4146.1	MSTRG.4146	.	yes	novel	trans	NA	-42.41	0.961557
ENSSSCT00000004877	0	chr1	84719535	84735860	MSTRG.695	CD164	yes	GO:0016021(integral component of membrane);GO:0016020(membrane);GO:0005886(plasma membrane);GO:0005768(endosome);GO:0005764(lysosome);GO:0007157(heterophilic cell-cell adhesion via plasma membrane cell adhesion molecules);GO:0007155(cell adhesion)	04142(Lysosome)	K06546	NA	CD164 molecule [Source:HGNC Symbol;Acc:HGNC:1632]	MSTRG.4625.3	MSTRG.4625	.	yes	novel	trans	NA	-49.39	0.952767
ENSSSCT00000004877	0	chr1	84719535	84735860	MSTRG.695	CD164	yes	GO:0016021(integral component of membrane);GO:0016020(membrane);GO:0005886(plasma membrane);GO:0005768(endosome);GO:0005764(lysosome);GO:0007157(heterophilic cell-cell adhesion via plasma membrane cell adhesion molecules);GO:0007155(cell adhesion)	04142(Lysosome)	K06546	NA	CD164 molecule [Source:HGNC Symbol;Acc:HGNC:1632]	MSTRG.5643.1	MSTRG.5643	MYL4	yes	novel	trans	NA	-25.93	-0.98195
ENSSSCT00000004877	0	chr1	84719535	84735860	MSTRG.695	CD164	yes	GO:0016021(integral component of membrane);GO:0016020(membrane);GO:0005886(plasma membrane);GO:0005768(endosome);GO:0005764(lysosome);GO:0007157(heterophilic cell-cell adhesion via plasma membrane cell adhesion molecules);GO:0007155(cell adhesion)	04142(Lysosome)	K06546	NA	CD164 molecule [Source:HGNC Symbol;Acc:HGNC:1632]	MSTRG.6301.1	MSTRG.6301	.	yes	novel	trans	NA	-43.78	0.98104
ENSSSCT00000004877	0	chr1	84719535	84735860	MSTRG.695	CD164	yes	GO:0016021(integral component of membrane);GO:0016020(membrane);GO:0005886(plasma membrane);GO:0005768(endosome);GO:0005764(lysosome);GO:0007157(heterophilic cell-cell adhesion via plasma membrane cell adhesion molecules);GO:0007155(cell adhesion)	04142(Lysosome)	K06546	NA	CD164 molecule [Source:HGNC Symbol;Acc:HGNC:1632]	MSTRG.6500.1	MSTRG.6500	.	yes	novel	trans	NA	-24.65	0.988332
ENSSSCT00000004877	0	chr1	84719535	84735860	MSTRG.695	CD164	yes	GO:0016021(integral component of membrane);GO:0016020(membrane);GO:0005886(plasma membrane);GO:0005768(endosome);GO:0005764(lysosome);GO:0007157(heterophilic cell-cell adhesion via plasma membrane cell adhesion molecules);GO:0007155(cell adhesion)	04142(Lysosome)	K06546	NA	CD164 molecule [Source:HGNC Symbol;Acc:HGNC:1632]	MSTRG.8882.1	MSTRG.8882	.	yes	novel	trans	NA	-31.21	-0.968204
ENSSSCT00000004877	0	chr1	84719535	84735860	MSTRG.695	CD164	yes	GO:0016021(integral component of membrane);GO:0016020(membrane);GO:0005886(plasma membrane);GO:0005768(endosome);GO:0005764(lysosome);GO:0007157(heterophilic cell-cell adhesion via plasma membrane cell adhesion molecules);GO:0007155(cell adhesion)	04142(Lysosome)	K06546	NA	CD164 molecule [Source:HGNC Symbol;Acc:HGNC:1632]	MSTRG.9389.1	MSTRG.9389	ENSSSCG00000030480	yes	novel	trans	NA	-36.42	-0.961529
ENSSSCT00000004877	0	chr1	84719535	84735860	MSTRG.695	CD164	yes	GO:0016021(integral component of membrane);GO:0016020(membrane);GO:0005886(plasma membrane);GO:0005768(endosome);GO:0005764(lysosome);GO:0007157(heterophilic cell-cell adhesion via plasma membrane cell adhesion molecules);GO:0007155(cell adhesion)	04142(Lysosome)	K06546	NA	CD164 molecule [Source:HGNC Symbol;Acc:HGNC:1632]	MSTRG.10360.1	MSTRG.10360	.	yes	novel	trans	NA	-20.05	0.952527
ENSSSCT00000004877	0	chr1	84719535	84735860	MSTRG.695	CD164	yes	GO:0016021(integral component of membrane);GO:0016020(membrane);GO:0005886(plasma membrane);GO:0005768(endosome);GO:0005764(lysosome);GO:0007157(heterophilic cell-cell adhesion via plasma membrane cell adhesion molecules);GO:0007155(cell adhesion)	04142(Lysosome)	K06546	NA	CD164 molecule [Source:HGNC Symbol;Acc:HGNC:1632]	MSTRG.11036.1	MSTRG.11036	.	yes	novel	trans	NA	-26.59	0.963908
ENSSSCT00000004877	0	chr1	84719535	84735860	MSTRG.695	CD164	yes	GO:0016021(integral component of membrane);GO:0016020(membrane);GO:0005886(plasma membrane);GO:0005768(endosome);GO:0005764(lysosome);GO:0007157(heterophilic cell-cell adhesion via plasma membrane cell adhesion molecules);GO:0007155(cell adhesion)	04142(Lysosome)	K06546	NA	CD164 molecule [Source:HGNC Symbol;Acc:HGNC:1632]	MSTRG.11081.1	MSTRG.11081	.	yes	novel	trans	NA	-33.86	-0.975106
ENSSSCT00000004877	0	chr1	84719535	84735860	MSTRG.695	CD164	yes	GO:0016021(integral component of membrane);GO:0016020(membrane);GO:0005886(plasma membrane);GO:0005768(endosome);GO:0005764(lysosome);GO:0007157(heterophilic cell-cell adhesion via plasma membrane cell adhesion molecules);GO:0007155(cell adhesion)	04142(Lysosome)	K06546	NA	CD164 molecule [Source:HGNC Symbol;Acc:HGNC:1632]	MSTRG.11777.1	MSTRG.11777	.	yes	novel	trans	NA	-38.04	0.958544
ENSSSCT00000004877	0	chr1	84719535	84735860	MSTRG.695	CD164	yes	GO:0016021(integral component of membrane);GO:0016020(membrane);GO:0005886(plasma membrane);GO:0005768(endosome);GO:0005764(lysosome);GO:0007157(heterophilic cell-cell adhesion via plasma membrane cell adhesion molecules);GO:0007155(cell adhesion)	04142(Lysosome)	K06546	NA	CD164 molecule [Source:HGNC Symbol;Acc:HGNC:1632]	MSTRG.12278.1	MSTRG.12278	U6	yes	novel	trans	NA	-34.89	0.966318
ENSSSCT00000004877	0	chr1	84719535	84735860	MSTRG.695	CD164	yes	GO:0016021(integral component of membrane);GO:0016020(membrane);GO:0005886(plasma membrane);GO:0005768(endosome);GO:0005764(lysosome);GO:0007157(heterophilic cell-cell adhesion via plasma membrane cell adhesion molecules);GO:0007155(cell adhesion)	04142(Lysosome)	K06546	NA	CD164 molecule [Source:HGNC Symbol;Acc:HGNC:1632]	MSTRG.12511.1	MSTRG.12511	.	yes	novel	trans	NA	-34.37	0.961679
ENSSSCT00000004877	0	chr1	84719535	84735860	MSTRG.695	CD164	yes	GO:0016021(integral component of membrane);GO:0016020(membrane);GO:0005886(plasma membrane);GO:0005768(endosome);GO:0005764(lysosome);GO:0007157(heterophilic cell-cell adhesion via plasma membrane cell adhesion molecules);GO:0007155(cell adhesion)	04142(Lysosome)	K06546	NA	CD164 molecule [Source:HGNC Symbol;Acc:HGNC:1632]	MSTRG.13663.1	MSTRG.13663	.	yes	novel	trans	NA	-32.21	0.99576
ENSSSCT00000004877	0	chr1	84719535	84735860	MSTRG.695	CD164	yes	GO:0016021(integral component of membrane);GO:0016020(membrane);GO:0005886(plasma membrane);GO:0005768(endosome);GO:0005764(lysosome);GO:0007157(heterophilic cell-cell adhesion via plasma membrane cell adhesion molecules);GO:0007155(cell adhesion)	04142(Lysosome)	K06546	NA	CD164 molecule [Source:HGNC Symbol;Acc:HGNC:1632]	MSTRG.14046.1	MSTRG.14046	.	yes	novel	trans	NA	-47.15	0.951673
ENSSSCT00000004877	0	chr1	84719535	84735860	MSTRG.695	CD164	yes	GO:0016021(integral component of membrane);GO:0016020(membrane);GO:0005886(plasma membrane);GO:0005768(endosome);GO:0005764(lysosome);GO:0007157(heterophilic cell-cell adhesion via plasma membrane cell adhesion molecules);GO:0007155(cell adhesion)	04142(Lysosome)	K06546	NA	CD164 molecule [Source:HGNC Symbol;Acc:HGNC:1632]	MSTRG.14254.1	MSTRG.14254	.	yes	novel	trans	NA	-20.55	0.974884
ENSSSCT00000004877	0	chr1	84719535	84735860	MSTRG.695	CD164	yes	GO:0016021(integral component of membrane);GO:0016020(membrane);GO:0005886(plasma membrane);GO:0005768(endosome);GO:0005764(lysosome);GO:0007157(heterophilic cell-cell adhesion via plasma membrane cell adhesion molecules);GO:0007155(cell adhesion)	04142(Lysosome)	K06546	NA	CD164 molecule [Source:HGNC Symbol;Acc:HGNC:1632]	MSTRG.15360.1	MSTRG.15360	.	yes	novel	trans	NA	-33.87	-0.976299
ENSSSCT00000004877	0	chr1	84719535	84735860	MSTRG.695	CD164	yes	GO:0016021(integral component of membrane);GO:0016020(membrane);GO:0005886(plasma membrane);GO:0005768(endosome);GO:0005764(lysosome);GO:0007157(heterophilic cell-cell adhesion via plasma membrane cell adhesion molecules);GO:0007155(cell adhesion)	04142(Lysosome)	K06546	NA	CD164 molecule [Source:HGNC Symbol;Acc:HGNC:1632]	MSTRG.16154.1	MSTRG.16154	.	yes	novel	trans	NA	-42.82	0.960175
ENSSSCT00000004877	0	chr1	84719535	84735860	MSTRG.695	CD164	yes	GO:0016021(integral component of membrane);GO:0016020(membrane);GO:0005886(plasma membrane);GO:0005768(endosome);GO:0005764(lysosome);GO:0007157(heterophilic cell-cell adhesion via plasma membrane cell adhesion molecules);GO:0007155(cell adhesion)	04142(Lysosome)	K06546	NA	CD164 molecule [Source:HGNC Symbol;Acc:HGNC:1632]	MSTRG.19520.1	MSTRG.19520	.	yes	novel	trans	NA	-29.02	0.955233
ENSSSCT00000004877	0	chr1	84719535	84735860	MSTRG.695	CD164	yes	GO:0016021(integral component of membrane);GO:0016020(membrane);GO:0005886(plasma membrane);GO:0005768(endosome);GO:0005764(lysosome);GO:0007157(heterophilic cell-cell adhesion via plasma membrane cell adhesion molecules);GO:0007155(cell adhesion)	04142(Lysosome)	K06546	NA	CD164 molecule [Source:HGNC Symbol;Acc:HGNC:1632]	MSTRG.20540.1	MSTRG.20540	.	yes	novel	trans	NA	-37.51	-0.97093
ENSSSCT00000004877	0	chr1	84719535	84735860	MSTRG.695	CD164	yes	GO:0016021(integral component of membrane);GO:0016020(membrane);GO:0005886(plasma membrane);GO:0005768(endosome);GO:0005764(lysosome);GO:0007157(heterophilic cell-cell adhesion via plasma membrane cell adhesion molecules);GO:0007155(cell adhesion)	04142(Lysosome)	K06546	NA	CD164 molecule [Source:HGNC Symbol;Acc:HGNC:1632]	MSTRG.21860.1	MSTRG.21860	.	yes	novel	trans	NA	-36.94	0.956886
ENSSSCT00000004877	0	chr1	84719535	84735860	MSTRG.695	CD164	yes	GO:0016021(integral component of membrane);GO:0016020(membrane);GO:0005886(plasma membrane);GO:0005768(endosome);GO:0005764(lysosome);GO:0007157(heterophilic cell-cell adhesion via plasma membrane cell adhesion molecules);GO:0007155(cell adhesion)	04142(Lysosome)	K06546	NA	CD164 molecule [Source:HGNC Symbol;Acc:HGNC:1632]	MSTRG.22198.1	MSTRG.22198	.	yes	novel	trans	NA	-21.86	0.951514
ENSSSCT00000004877	0	chr1	84719535	84735860	MSTRG.695	CD164	yes	GO:0016021(integral component of membrane);GO:0016020(membrane);GO:0005886(plasma membrane);GO:0005768(endosome);GO:0005764(lysosome);GO:0007157(heterophilic cell-cell adhesion via plasma membrane cell adhesion molecules);GO:0007155(cell adhesion)	04142(Lysosome)	K06546	NA	CD164 molecule [Source:HGNC Symbol;Acc:HGNC:1632]	MSTRG.22503.1	MSTRG.22503	CIART	yes	novel	trans	NA	-50.04	0.985677
ENSSSCT00000004877	0	chr1	84719535	84735860	MSTRG.695	CD164	yes	GO:0016021(integral component of membrane);GO:0016020(membrane);GO:0005886(plasma membrane);GO:0005768(endosome);GO:0005764(lysosome);GO:0007157(heterophilic cell-cell adhesion via plasma membrane cell adhesion molecules);GO:0007155(cell adhesion)	04142(Lysosome)	K06546	NA	CD164 molecule [Source:HGNC Symbol;Acc:HGNC:1632]	MSTRG.22782.1	MSTRG.22782	.	yes	novel	trans	NA	-34.16	0.968787
ENSSSCT00000004877	0	chr1	84719535	84735860	MSTRG.695	CD164	yes	GO:0016021(integral component of membrane);GO:0016020(membrane);GO:0005886(plasma membrane);GO:0005768(endosome);GO:0005764(lysosome);GO:0007157(heterophilic cell-cell adhesion via plasma membrane cell adhesion molecules);GO:0007155(cell adhesion)	04142(Lysosome)	K06546	NA	CD164 molecule [Source:HGNC Symbol;Acc:HGNC:1632]	MSTRG.23881.1	MSTRG.23881	.	yes	novel	trans	NA	-44.09	0.95746
ENSSSCT00000004877	0	chr1	84719535	84735860	MSTRG.695	CD164	yes	GO:0016021(integral component of membrane);GO:0016020(membrane);GO:0005886(plasma membrane);GO:0005768(endosome);GO:0005764(lysosome);GO:0007157(heterophilic cell-cell adhesion via plasma membrane cell adhesion molecules);GO:0007155(cell adhesion)	04142(Lysosome)	K06546	NA	CD164 molecule [Source:HGNC Symbol;Acc:HGNC:1632]	MSTRG.24277.1	MSTRG.24277	.	yes	novel	trans	NA	-46.23	0.981369
ENSSSCT00000004877	0	chr1	84719535	84735860	MSTRG.695	CD164	yes	GO:0016021(integral component of membrane);GO:0016020(membrane);GO:0005886(plasma membrane);GO:0005768(endosome);GO:0005764(lysosome);GO:0007157(heterophilic cell-cell adhesion via plasma membrane cell adhesion molecules);GO:0007155(cell adhesion)	04142(Lysosome)	K06546	NA	CD164 molecule [Source:HGNC Symbol;Acc:HGNC:1632]	MSTRG.24605.1	MSTRG.24605	.	yes	novel	trans	NA	-19.89	0.953218
ENSSSCT00000004877	0	chr1	84719535	84735860	MSTRG.695	CD164	yes	GO:0016021(integral component of membrane);GO:0016020(membrane);GO:0005886(plasma membrane);GO:0005768(endosome);GO:0005764(lysosome);GO:0007157(heterophilic cell-cell adhesion via plasma membrane cell adhesion molecules);GO:0007155(cell adhesion)	04142(Lysosome)	K06546	NA	CD164 molecule [Source:HGNC Symbol;Acc:HGNC:1632]	MSTRG.24799.1	MSTRG.24799	.	yes	novel	trans	NA	-36.75	0.972584
ENSSSCT00000004877	0	chr1	84719535	84735860	MSTRG.695	CD164	yes	GO:0016021(integral component of membrane);GO:0016020(membrane);GO:0005886(plasma membrane);GO:0005768(endosome);GO:0005764(lysosome);GO:0007157(heterophilic cell-cell adhesion via plasma membrane cell adhesion molecules);GO:0007155(cell adhesion)	04142(Lysosome)	K06546	NA	CD164 molecule [Source:HGNC Symbol;Acc:HGNC:1632]	MSTRG.24850.1	MSTRG.24850	.	yes	novel	trans	NA	-44.35	0.95854
ENSSSCT00000004877	0	chr1	84719535	84735860	MSTRG.695	CD164	yes	GO:0016021(integral component of membrane);GO:0016020(membrane);GO:0005886(plasma membrane);GO:0005768(endosome);GO:0005764(lysosome);GO:0007157(heterophilic cell-cell adhesion via plasma membrane cell adhesion molecules);GO:0007155(cell adhesion)	04142(Lysosome)	K06546	NA	CD164 molecule [Source:HGNC Symbol;Acc:HGNC:1632]	MSTRG.25871.1	MSTRG.25871	PIH1D1	yes	novel	trans	NA	-12.81	0.955552
ENSSSCT00000004877	0	chr1	84719535	84735860	MSTRG.695	CD164	yes	GO:0016021(integral component of membrane);GO:0016020(membrane);GO:0005886(plasma membrane);GO:0005768(endosome);GO:0005764(lysosome);GO:0007157(heterophilic cell-cell adhesion via plasma membrane cell adhesion molecules);GO:0007155(cell adhesion)	04142(Lysosome)	K06546	NA	CD164 molecule [Source:HGNC Symbol;Acc:HGNC:1632]	MSTRG.26444.1	MSTRG.26444	.	yes	novel	trans	NA	-34.36	0.980687
ENSSSCT00000004877	0	chr1	84719535	84735860	MSTRG.695	CD164	yes	GO:0016021(integral component of membrane);GO:0016020(membrane);GO:0005886(plasma membrane);GO:0005768(endosome);GO:0005764(lysosome);GO:0007157(heterophilic cell-cell adhesion via plasma membrane cell adhesion molecules);GO:0007155(cell adhesion)	04142(Lysosome)	K06546	NA	CD164 molecule [Source:HGNC Symbol;Acc:HGNC:1632]	MSTRG.26758.1	MSTRG.26758	ENSSSCG00000027352	yes	novel	trans	NA	-28.79	0.959841
ENSSSCT00000004877	0	chr1	84719535	84735860	MSTRG.695	CD164	yes	GO:0016021(integral component of membrane);GO:0016020(membrane);GO:0005886(plasma membrane);GO:0005768(endosome);GO:0005764(lysosome);GO:0007157(heterophilic cell-cell adhesion via plasma membrane cell adhesion molecules);GO:0007155(cell adhesion)	04142(Lysosome)	K06546	NA	CD164 molecule [Source:HGNC Symbol;Acc:HGNC:1632]	MSTRG.27332.1	MSTRG.27332	.	yes	novel	trans	NA	-31.66	0.956699
ENSSSCT00000004877	0	chr1	84719535	84735860	MSTRG.695	CD164	yes	GO:0016021(integral component of membrane);GO:0016020(membrane);GO:0005886(plasma membrane);GO:0005768(endosome);GO:0005764(lysosome);GO:0007157(heterophilic cell-cell adhesion via plasma membrane cell adhesion molecules);GO:0007155(cell adhesion)	04142(Lysosome)	K06546	NA	CD164 molecule [Source:HGNC Symbol;Acc:HGNC:1632]	MSTRG.27711.1	MSTRG.27711	.	yes	novel	trans	NA	-17.26	-0.98556
ENSSSCT00000004877	0	chr1	84719535	84735860	MSTRG.695	CD164	yes	GO:0016021(integral component of membrane);GO:0016020(membrane);GO:0005886(plasma membrane);GO:0005768(endosome);GO:0005764(lysosome);GO:0007157(heterophilic cell-cell adhesion via plasma membrane cell adhesion molecules);GO:0007155(cell adhesion)	04142(Lysosome)	K06546	NA	CD164 molecule [Source:HGNC Symbol;Acc:HGNC:1632]	MSTRG.28025.1	MSTRG.28025	.	yes	novel	trans	NA	-36.56	0.983719
ENSSSCT00000004877	0	chr1	84719535	84735860	MSTRG.695	CD164	yes	GO:0016021(integral component of membrane);GO:0016020(membrane);GO:0005886(plasma membrane);GO:0005768(endosome);GO:0005764(lysosome);GO:0007157(heterophilic cell-cell adhesion via plasma membrane cell adhesion molecules);GO:0007155(cell adhesion)	04142(Lysosome)	K06546	NA	CD164 molecule [Source:HGNC Symbol;Acc:HGNC:1632]	MSTRG.28708.1	MSTRG.28708	.	yes	novel	trans	NA	-24.39	0.960707
ENSSSCT00000004877	0	chr1	84719535	84735860	MSTRG.695	CD164	yes	GO:0016021(integral component of membrane);GO:0016020(membrane);GO:0005886(plasma membrane);GO:0005768(endosome);GO:0005764(lysosome);GO:0007157(heterophilic cell-cell adhesion via plasma membrane cell adhesion molecules);GO:0007155(cell adhesion)	04142(Lysosome)	K06546	NA	CD164 molecule [Source:HGNC Symbol;Acc:HGNC:1632]	MSTRG.28976.1	MSTRG.28976	.	yes	novel	trans	NA	-20.41	0.955266
ENSSSCT00000004877	0	chr1	84719535	84735860	MSTRG.695	CD164	yes	GO:0016021(integral component of membrane);GO:0016020(membrane);GO:0005886(plasma membrane);GO:0005768(endosome);GO:0005764(lysosome);GO:0007157(heterophilic cell-cell adhesion via plasma membrane cell adhesion molecules);GO:0007155(cell adhesion)	04142(Lysosome)	K06546	NA	CD164 molecule [Source:HGNC Symbol;Acc:HGNC:1632]	MSTRG.29455.1	MSTRG.29455	ENSSSCG00000002451	yes	novel	trans	NA	-48.01	0.979121
ENSSSCT00000004877	0	chr1	84719535	84735860	MSTRG.695	CD164	yes	GO:0016021(integral component of membrane);GO:0016020(membrane);GO:0005886(plasma membrane);GO:0005768(endosome);GO:0005764(lysosome);GO:0007157(heterophilic cell-cell adhesion via plasma membrane cell adhesion molecules);GO:0007155(cell adhesion)	04142(Lysosome)	K06546	NA	CD164 molecule [Source:HGNC Symbol;Acc:HGNC:1632]	MSTRG.30173.1	MSTRG.30173	CXCL2	yes	novel	trans	NA	-51.17	0.970742
ENSSSCT00000004877	0	chr1	84719535	84735860	MSTRG.695	CD164	yes	GO:0016021(integral component of membrane);GO:0016020(membrane);GO:0005886(plasma membrane);GO:0005768(endosome);GO:0005764(lysosome);GO:0007157(heterophilic cell-cell adhesion via plasma membrane cell adhesion molecules);GO:0007155(cell adhesion)	04142(Lysosome)	K06546	NA	CD164 molecule [Source:HGNC Symbol;Acc:HGNC:1632]	MSTRG.30209.1	MSTRG.30209	.	yes	novel	trans	NA	-26.23	0.977336
ENSSSCT00000004877	0	chr1	84719535	84735860	MSTRG.695	CD164	yes	GO:0016021(integral component of membrane);GO:0016020(membrane);GO:0005886(plasma membrane);GO:0005768(endosome);GO:0005764(lysosome);GO:0007157(heterophilic cell-cell adhesion via plasma membrane cell adhesion molecules);GO:0007155(cell adhesion)	04142(Lysosome)	K06546	NA	CD164 molecule [Source:HGNC Symbol;Acc:HGNC:1632]	MSTRG.30360.1	MSTRG.30360	.	yes	novel	trans	NA	-21.46	0.9611
ENSSSCT00000004877	0	chr1	84719535	84735860	MSTRG.695	CD164	yes	GO:0016021(integral component of membrane);GO:0016020(membrane);GO:0005886(plasma membrane);GO:0005768(endosome);GO:0005764(lysosome);GO:0007157(heterophilic cell-cell adhesion via plasma membrane cell adhesion molecules);GO:0007155(cell adhesion)	04142(Lysosome)	K06546	NA	CD164 molecule [Source:HGNC Symbol;Acc:HGNC:1632]	MSTRG.30732.1	MSTRG.30732	.	yes	novel	trans	NA	-29.21	0.986076
ENSSSCT00000004877	0	chr1	84719535	84735860	MSTRG.695	CD164	yes	GO:0016021(integral component of membrane);GO:0016020(membrane);GO:0005886(plasma membrane);GO:0005768(endosome);GO:0005764(lysosome);GO:0007157(heterophilic cell-cell adhesion via plasma membrane cell adhesion molecules);GO:0007155(cell adhesion)	04142(Lysosome)	K06546	NA	CD164 molecule [Source:HGNC Symbol;Acc:HGNC:1632]	MSTRG.31992.1	MSTRG.31992	.	yes	novel	trans	NA	-38.99	0.9741
ENSSSCT00000004864	0	chr1	85867147	85892926	MSTRG.708	DDO	yes	GO:0055114(oxidation-reduction process);GO:0046416(D-amino acid metabolic process);GO:0042445(hormone metabolic process);GO:0019478(D-amino acid catabolic process);GO:0007625(grooming behavior);GO:0007320(insemination);GO:0006531(aspartate metabolic process);GO:0071949(FAD binding);GO:0048037(cofactor binding);GO:0016491(oxidoreductase activity);GO:0008445(D-aspartate oxidase activity);GO:0005102…	00250(Alanine, aspartate and glutamate metabolism);04146(Peroxisome)	K00272	EC:1.4.3.1	D-aspartate oxidase [Source:RefSeq peptide;Acc:NP_001090895]	MSTRG.5813.1	MSTRG.5813	.	yes	novel	trans	NA	-22.21	-0.978313
ENSSSCT00000004864	0	chr1	85867147	85892926	MSTRG.708	DDO	yes	GO:0055114(oxidation-reduction process);GO:0046416(D-amino acid metabolic process);GO:0042445(hormone metabolic process);GO:0019478(D-amino acid catabolic process);GO:0007625(grooming behavior);GO:0007320(insemination);GO:0006531(aspartate metabolic process);GO:0071949(FAD binding);GO:0048037(cofactor binding);GO:0016491(oxidoreductase activity);GO:0008445(D-aspartate oxidase activity);GO:0005102…	00250(Alanine, aspartate and glutamate metabolism);04146(Peroxisome)	K00272	EC:1.4.3.1	D-aspartate oxidase [Source:RefSeq peptide;Acc:NP_001090895]	MSTRG.7277.1	MSTRG.7277	.	yes	novel	trans	NA	-26.13	-0.960518
ENSSSCT00000004864	0	chr1	85867147	85892926	MSTRG.708	DDO	yes	GO:0055114(oxidation-reduction process);GO:0046416(D-amino acid metabolic process);GO:0042445(hormone metabolic process);GO:0019478(D-amino acid catabolic process);GO:0007625(grooming behavior);GO:0007320(insemination);GO:0006531(aspartate metabolic process);GO:0071949(FAD binding);GO:0048037(cofactor binding);GO:0016491(oxidoreductase activity);GO:0008445(D-aspartate oxidase activity);GO:0005102…	00250(Alanine, aspartate and glutamate metabolism);04146(Peroxisome)	K00272	EC:1.4.3.1	D-aspartate oxidase [Source:RefSeq peptide;Acc:NP_001090895]	MSTRG.8860.1	MSTRG.8860	LRCH3	yes	novel	trans	NA	-30.40	-0.950114
ENSSSCT00000004864	0	chr1	85867147	85892926	MSTRG.708	DDO	yes	GO:0055114(oxidation-reduction process);GO:0046416(D-amino acid metabolic process);GO:0042445(hormone metabolic process);GO:0019478(D-amino acid catabolic process);GO:0007625(grooming behavior);GO:0007320(insemination);GO:0006531(aspartate metabolic process);GO:0071949(FAD binding);GO:0048037(cofactor binding);GO:0016491(oxidoreductase activity);GO:0008445(D-aspartate oxidase activity);GO:0005102…	00250(Alanine, aspartate and glutamate metabolism);04146(Peroxisome)	K00272	EC:1.4.3.1	D-aspartate oxidase [Source:RefSeq peptide;Acc:NP_001090895]	MSTRG.9930.1	MSTRG.9930	.	yes	novel	trans	NA	-37.77	-0.960279
ENSSSCT00000004864	0	chr1	85867147	85892926	MSTRG.708	DDO	yes	GO:0055114(oxidation-reduction process);GO:0046416(D-amino acid metabolic process);GO:0042445(hormone metabolic process);GO:0019478(D-amino acid catabolic process);GO:0007625(grooming behavior);GO:0007320(insemination);GO:0006531(aspartate metabolic process);GO:0071949(FAD binding);GO:0048037(cofactor binding);GO:0016491(oxidoreductase activity);GO:0008445(D-aspartate oxidase activity);GO:0005102…	00250(Alanine, aspartate and glutamate metabolism);04146(Peroxisome)	K00272	EC:1.4.3.1	D-aspartate oxidase [Source:RefSeq peptide;Acc:NP_001090895]	MSTRG.11883.1	MSTRG.11883	ENSSSCG00000015692	yes	novel	trans	NA	-24.41	-0.981783
ENSSSCT00000004864	0	chr1	85867147	85892926	MSTRG.708	DDO	yes	GO:0055114(oxidation-reduction process);GO:0046416(D-amino acid metabolic process);GO:0042445(hormone metabolic process);GO:0019478(D-amino acid catabolic process);GO:0007625(grooming behavior);GO:0007320(insemination);GO:0006531(aspartate metabolic process);GO:0071949(FAD binding);GO:0048037(cofactor binding);GO:0016491(oxidoreductase activity);GO:0008445(D-aspartate oxidase activity);GO:0005102…	00250(Alanine, aspartate and glutamate metabolism);04146(Peroxisome)	K00272	EC:1.4.3.1	D-aspartate oxidase [Source:RefSeq peptide;Acc:NP_001090895]	MSTRG.16057.1	MSTRG.16057	.	yes	novel	trans	NA	-49.28	-0.987121
ENSSSCT00000004864	0	chr1	85867147	85892926	MSTRG.708	DDO	yes	GO:0055114(oxidation-reduction process);GO:0046416(D-amino acid metabolic process);GO:0042445(hormone metabolic process);GO:0019478(D-amino acid catabolic process);GO:0007625(grooming behavior);GO:0007320(insemination);GO:0006531(aspartate metabolic process);GO:0071949(FAD binding);GO:0048037(cofactor binding);GO:0016491(oxidoreductase activity);GO:0008445(D-aspartate oxidase activity);GO:0005102…	00250(Alanine, aspartate and glutamate metabolism);04146(Peroxisome)	K00272	EC:1.4.3.1	D-aspartate oxidase [Source:RefSeq peptide;Acc:NP_001090895]	MSTRG.16431.1	MSTRG.16431	.	yes	novel	trans	NA	-46.20	-0.957311
ENSSSCT00000004864	0	chr1	85867147	85892926	MSTRG.708	DDO	yes	GO:0055114(oxidation-reduction process);GO:0046416(D-amino acid metabolic process);GO:0042445(hormone metabolic process);GO:0019478(D-amino acid catabolic process);GO:0007625(grooming behavior);GO:0007320(insemination);GO:0006531(aspartate metabolic process);GO:0071949(FAD binding);GO:0048037(cofactor binding);GO:0016491(oxidoreductase activity);GO:0008445(D-aspartate oxidase activity);GO:0005102…	00250(Alanine, aspartate and glutamate metabolism);04146(Peroxisome)	K00272	EC:1.4.3.1	D-aspartate oxidase [Source:RefSeq peptide;Acc:NP_001090895]	MSTRG.17488.1	MSTRG.17488	ZNF791	yes	novel	trans	NA	-46.84	-0.953367
ENSSSCT00000004864	0	chr1	85867147	85892926	MSTRG.708	DDO	yes	GO:0055114(oxidation-reduction process);GO:0046416(D-amino acid metabolic process);GO:0042445(hormone metabolic process);GO:0019478(D-amino acid catabolic process);GO:0007625(grooming behavior);GO:0007320(insemination);GO:0006531(aspartate metabolic process);GO:0071949(FAD binding);GO:0048037(cofactor binding);GO:0016491(oxidoreductase activity);GO:0008445(D-aspartate oxidase activity);GO:0005102…	00250(Alanine, aspartate and glutamate metabolism);04146(Peroxisome)	K00272	EC:1.4.3.1	D-aspartate oxidase [Source:RefSeq peptide;Acc:NP_001090895]	MSTRG.19547.1	MSTRG.19547	.	yes	novel	trans	NA	-47.59	0.955531
ENSSSCT00000004864	0	chr1	85867147	85892926	MSTRG.708	DDO	yes	GO:0055114(oxidation-reduction process);GO:0046416(D-amino acid metabolic process);GO:0042445(hormone metabolic process);GO:0019478(D-amino acid catabolic process);GO:0007625(grooming behavior);GO:0007320(insemination);GO:0006531(aspartate metabolic process);GO:0071949(FAD binding);GO:0048037(cofactor binding);GO:0016491(oxidoreductase activity);GO:0008445(D-aspartate oxidase activity);GO:0005102…	00250(Alanine, aspartate and glutamate metabolism);04146(Peroxisome)	K00272	EC:1.4.3.1	D-aspartate oxidase [Source:RefSeq peptide;Acc:NP_001090895]	MSTRG.24723.1	MSTRG.24723	.	yes	novel	trans	NA	-22.71	0.957133
ENSSSCT00000004864	0	chr1	85867147	85892926	MSTRG.708	DDO	yes	GO:0055114(oxidation-reduction process);GO:0046416(D-amino acid metabolic process);GO:0042445(hormone metabolic process);GO:0019478(D-amino acid catabolic process);GO:0007625(grooming behavior);GO:0007320(insemination);GO:0006531(aspartate metabolic process);GO:0071949(FAD binding);GO:0048037(cofactor binding);GO:0016491(oxidoreductase activity);GO:0008445(D-aspartate oxidase activity);GO:0005102…	00250(Alanine, aspartate and glutamate metabolism);04146(Peroxisome)	K00272	EC:1.4.3.1	D-aspartate oxidase [Source:RefSeq peptide;Acc:NP_001090895]	MSTRG.26467.1	MSTRG.26467	.	yes	novel	trans	NA	-43.81	0.954386
ENSSSCT00000004893	0	chr1	87822314	88044744	MSTRG.748	ENSSSCG00000004428	yes	NA	NA	NA	NA	NA	MSTRG.4592.1	MSTRG.4592	.	yes	novel	trans	NA	-26.68	0.977777
ENSSSCT00000004893	0	chr1	87822314	88044744	MSTRG.748	ENSSSCG00000004428	yes	NA	NA	NA	NA	NA	MSTRG.4625.3	MSTRG.4625	.	yes	novel	trans	NA	-34.62	0.961064
ENSSSCT00000004893	0	chr1	87822314	88044744	MSTRG.748	ENSSSCG00000004428	yes	NA	NA	NA	NA	NA	MSTRG.8811.1	MSTRG.8811	.	yes	novel	trans	NA	-35.63	0.969407
ENSSSCT00000004893	0	chr1	87822314	88044744	MSTRG.748	ENSSSCG00000004428	yes	NA	NA	NA	NA	NA	MSTRG.10446.1	MSTRG.10446	.	yes	novel	trans	NA	-35.03	0.984149
ENSSSCT00000004893	0	chr1	87822314	88044744	MSTRG.748	ENSSSCG00000004428	yes	NA	NA	NA	NA	NA	MSTRG.13419.1	MSTRG.13419	.	yes	novel	trans	NA	-26.00	-0.96911
ENSSSCT00000004893	0	chr1	87822314	88044744	MSTRG.748	ENSSSCG00000004428	yes	NA	NA	NA	NA	NA	MSTRG.13921.1	MSTRG.13921	.	yes	novel	trans	NA	-46.19	0.951259
ENSSSCT00000004893	0	chr1	87822314	88044744	MSTRG.748	ENSSSCG00000004428	yes	NA	NA	NA	NA	NA	MSTRG.15022.1	MSTRG.15022	CEP250	yes	novel	trans	NA	-45.88	-0.96466
ENSSSCT00000004893	0	chr1	87822314	88044744	MSTRG.748	ENSSSCG00000004428	yes	NA	NA	NA	NA	NA	MSTRG.15649.1	MSTRG.15649	.	yes	novel	trans	NA	-41.27	-0.95513
ENSSSCT00000004893	0	chr1	87822314	88044744	MSTRG.748	ENSSSCG00000004428	yes	NA	NA	NA	NA	NA	MSTRG.16431.1	MSTRG.16431	.	yes	novel	trans	NA	-37.01	-0.96122
ENSSSCT00000004893	0	chr1	87822314	88044744	MSTRG.748	ENSSSCG00000004428	yes	NA	NA	NA	NA	NA	MSTRG.16579.1	MSTRG.16579	.	yes	novel	trans	NA	-46.24	0.972442
ENSSSCT00000004893	0	chr1	87822314	88044744	MSTRG.748	ENSSSCG00000004428	yes	NA	NA	NA	NA	NA	MSTRG.16579.2	MSTRG.16579	.	yes	novel	trans	NA	-55.86	0.963503
ENSSSCT00000004893	0	chr1	87822314	88044744	MSTRG.748	ENSSSCG00000004428	yes	NA	NA	NA	NA	NA	MSTRG.17206.1	MSTRG.17206	.	yes	novel	trans	NA	-33.73	-0.955766
ENSSSCT00000004893	0	chr1	87822314	88044744	MSTRG.748	ENSSSCG00000004428	yes	NA	NA	NA	NA	NA	MSTRG.19762.1	MSTRG.19762	.	yes	novel	trans	NA	-44.42	0.95575
ENSSSCT00000004893	0	chr1	87822314	88044744	MSTRG.748	ENSSSCG00000004428	yes	NA	NA	NA	NA	NA	MSTRG.21494.1	MSTRG.21494	.	yes	novel	trans	NA	-54.64	-0.95588
ENSSSCT00000004893	0	chr1	87822314	88044744	MSTRG.748	ENSSSCG00000004428	yes	NA	NA	NA	NA	NA	MSTRG.21860.1	MSTRG.21860	.	yes	novel	trans	NA	-27.58	0.957258
ENSSSCT00000004893	0	chr1	87822314	88044744	MSTRG.748	ENSSSCG00000004428	yes	NA	NA	NA	NA	NA	MSTRG.28708.1	MSTRG.28708	.	yes	novel	trans	NA	-39.73	0.953799
ENSSSCT00000004893	0	chr1	87822314	88044744	MSTRG.748	ENSSSCG00000004428	yes	NA	NA	NA	NA	NA	MSTRG.31992.1	MSTRG.31992	.	yes	novel	trans	NA	-35.08	0.956585
ENSSSCT00000004956	0	chr1	103136948	103292012	MSTRG.896	CD109	yes	GO:0016021(integral component of membrane);GO:0016020(membrane);GO:0005615(extracellular space);GO:0005576(extracellular region);GO:0010951(negative regulation of endopeptidase activity);GO:0004866(endopeptidase inhibitor activity);GO:0009986(cell surface);GO:0072675(osteoclast fusion);GO:0061045(negative regulation of wound healing);GO:0045616(regulation of keratinocyte differentiation);GO:00305…	NA	NA	NA	CD109 molecule [Source:HGNC Symbol;Acc:HGNC:21685]	MSTRG.5484.1	MSTRG.5484	.	yes	novel	trans	NA	-49.19	0.9735
ENSSSCT00000004956	0	chr1	103136948	103292012	MSTRG.896	CD109	yes	GO:0016021(integral component of membrane);GO:0016020(membrane);GO:0005615(extracellular space);GO:0005576(extracellular region);GO:0010951(negative regulation of endopeptidase activity);GO:0004866(endopeptidase inhibitor activity);GO:0009986(cell surface);GO:0072675(osteoclast fusion);GO:0061045(negative regulation of wound healing);GO:0045616(regulation of keratinocyte differentiation);GO:00305…	NA	NA	NA	CD109 molecule [Source:HGNC Symbol;Acc:HGNC:21685]	MSTRG.7078.1	MSTRG.7078	.	yes	novel	trans	NA	-38.85	0.968999
ENSSSCT00000004956	0	chr1	103136948	103292012	MSTRG.896	CD109	yes	GO:0016021(integral component of membrane);GO:0016020(membrane);GO:0005615(extracellular space);GO:0005576(extracellular region);GO:0010951(negative regulation of endopeptidase activity);GO:0004866(endopeptidase inhibitor activity);GO:0009986(cell surface);GO:0072675(osteoclast fusion);GO:0061045(negative regulation of wound healing);GO:0045616(regulation of keratinocyte differentiation);GO:00305…	NA	NA	NA	CD109 molecule [Source:HGNC Symbol;Acc:HGNC:21685]	MSTRG.22913.1	MSTRG.22913	.	yes	novel	trans	NA	-30.21	0.962316
ENSSSCT00000023900	0	chr1	108638412	108667299	MSTRG.966	LIPG	yes	GO:0009986(cell surface);GO:0005794(Golgi apparatus);GO:0005769(early endosome);GO:0005615(extracellular space);GO:0005576(extracellular region);GO:0055091(phospholipid homeostasis);GO:0050746(regulation of lipoprotein metabolic process);GO:0043691(reverse cholesterol transport);GO:0042632(cholesterol homeostasis);GO:0034375(high-density lipoprotein particle remodeling);GO:0032376(positive regula…	00561(Glycerolipid metabolism)	K01046	EC:3.1.1.3	lipase G, endothelial type [Source:HGNC Symbol;Acc:HGNC:6623]	MSTRG.5671.1	MSTRG.5671	.	yes	novel	trans	NA	-36.23	0.95015
ENSSSCT00000023900	0	chr1	108638412	108667299	MSTRG.966	LIPG	yes	GO:0009986(cell surface);GO:0005794(Golgi apparatus);GO:0005769(early endosome);GO:0005615(extracellular space);GO:0005576(extracellular region);GO:0055091(phospholipid homeostasis);GO:0050746(regulation of lipoprotein metabolic process);GO:0043691(reverse cholesterol transport);GO:0042632(cholesterol homeostasis);GO:0034375(high-density lipoprotein particle remodeling);GO:0032376(positive regula…	00561(Glycerolipid metabolism)	K01046	EC:3.1.1.3	lipase G, endothelial type [Source:HGNC Symbol;Acc:HGNC:6623]	MSTRG.5870.1	MSTRG.5870	.	yes	novel	trans	NA	-65.76	0.989886
ENSSSCT00000023900	0	chr1	108638412	108667299	MSTRG.966	LIPG	yes	GO:0009986(cell surface);GO:0005794(Golgi apparatus);GO:0005769(early endosome);GO:0005615(extracellular space);GO:0005576(extracellular region);GO:0055091(phospholipid homeostasis);GO:0050746(regulation of lipoprotein metabolic process);GO:0043691(reverse cholesterol transport);GO:0042632(cholesterol homeostasis);GO:0034375(high-density lipoprotein particle remodeling);GO:0032376(positive regula…	00561(Glycerolipid metabolism)	K01046	EC:3.1.1.3	lipase G, endothelial type [Source:HGNC Symbol;Acc:HGNC:6623]	MSTRG.9920.1	MSTRG.9920	.	yes	novel	trans	NA	-32.15	0.991678
ENSSSCT00000023900	0	chr1	108638412	108667299	MSTRG.966	LIPG	yes	GO:0009986(cell surface);GO:0005794(Golgi apparatus);GO:0005769(early endosome);GO:0005615(extracellular space);GO:0005576(extracellular region);GO:0055091(phospholipid homeostasis);GO:0050746(regulation of lipoprotein metabolic process);GO:0043691(reverse cholesterol transport);GO:0042632(cholesterol homeostasis);GO:0034375(high-density lipoprotein particle remodeling);GO:0032376(positive regula…	00561(Glycerolipid metabolism)	K01046	EC:3.1.1.3	lipase G, endothelial type [Source:HGNC Symbol;Acc:HGNC:6623]	MSTRG.11550.1	MSTRG.11550	.	yes	novel	trans	NA	-14.11	0.953166
ENSSSCT00000023900	0	chr1	108638412	108667299	MSTRG.966	LIPG	yes	GO:0009986(cell surface);GO:0005794(Golgi apparatus);GO:0005769(early endosome);GO:0005615(extracellular space);GO:0005576(extracellular region);GO:0055091(phospholipid homeostasis);GO:0050746(regulation of lipoprotein metabolic process);GO:0043691(reverse cholesterol transport);GO:0042632(cholesterol homeostasis);GO:0034375(high-density lipoprotein particle remodeling);GO:0032376(positive regula…	00561(Glycerolipid metabolism)	K01046	EC:3.1.1.3	lipase G, endothelial type [Source:HGNC Symbol;Acc:HGNC:6623]	MSTRG.12943.1	MSTRG.12943	.	yes	novel	trans	NA	-44.11	0.995375
ENSSSCT00000023900	0	chr1	108638412	108667299	MSTRG.966	LIPG	yes	GO:0009986(cell surface);GO:0005794(Golgi apparatus);GO:0005769(early endosome);GO:0005615(extracellular space);GO:0005576(extracellular region);GO:0055091(phospholipid homeostasis);GO:0050746(regulation of lipoprotein metabolic process);GO:0043691(reverse cholesterol transport);GO:0042632(cholesterol homeostasis);GO:0034375(high-density lipoprotein particle remodeling);GO:0032376(positive regula…	00561(Glycerolipid metabolism)	K01046	EC:3.1.1.3	lipase G, endothelial type [Source:HGNC Symbol;Acc:HGNC:6623]	MSTRG.16577.1	MSTRG.16577	.	yes	novel	trans	NA	-55.62	0.964641
ENSSSCT00000023900	0	chr1	108638412	108667299	MSTRG.966	LIPG	yes	GO:0009986(cell surface);GO:0005794(Golgi apparatus);GO:0005769(early endosome);GO:0005615(extracellular space);GO:0005576(extracellular region);GO:0055091(phospholipid homeostasis);GO:0050746(regulation of lipoprotein metabolic process);GO:0043691(reverse cholesterol transport);GO:0042632(cholesterol homeostasis);GO:0034375(high-density lipoprotein particle remodeling);GO:0032376(positive regula…	00561(Glycerolipid metabolism)	K01046	EC:3.1.1.3	lipase G, endothelial type [Source:HGNC Symbol;Acc:HGNC:6623]	MSTRG.16579.1	MSTRG.16579	.	yes	novel	trans	NA	-23.85	0.956985
ENSSSCT00000023900	0	chr1	108638412	108667299	MSTRG.966	LIPG	yes	GO:0009986(cell surface);GO:0005794(Golgi apparatus);GO:0005769(early endosome);GO:0005615(extracellular space);GO:0005576(extracellular region);GO:0055091(phospholipid homeostasis);GO:0050746(regulation of lipoprotein metabolic process);GO:0043691(reverse cholesterol transport);GO:0042632(cholesterol homeostasis);GO:0034375(high-density lipoprotein particle remodeling);GO:0032376(positive regula…	00561(Glycerolipid metabolism)	K01046	EC:3.1.1.3	lipase G, endothelial type [Source:HGNC Symbol;Acc:HGNC:6623]	MSTRG.20222.1	MSTRG.20222	.	yes	novel	trans	NA	-33.55	0.971462
ENSSSCT00000023900	0	chr1	108638412	108667299	MSTRG.966	LIPG	yes	GO:0009986(cell surface);GO:0005794(Golgi apparatus);GO:0005769(early endosome);GO:0005615(extracellular space);GO:0005576(extracellular region);GO:0055091(phospholipid homeostasis);GO:0050746(regulation of lipoprotein metabolic process);GO:0043691(reverse cholesterol transport);GO:0042632(cholesterol homeostasis);GO:0034375(high-density lipoprotein particle remodeling);GO:0032376(positive regula…	00561(Glycerolipid metabolism)	K01046	EC:3.1.1.3	lipase G, endothelial type [Source:HGNC Symbol;Acc:HGNC:6623]	MSTRG.23177.1	MSTRG.23177	.	yes	novel	trans	NA	-52.14	0.958682
ENSSSCT00000023900	0	chr1	108638412	108667299	MSTRG.966	LIPG	yes	GO:0009986(cell surface);GO:0005794(Golgi apparatus);GO:0005769(early endosome);GO:0005615(extracellular space);GO:0005576(extracellular region);GO:0055091(phospholipid homeostasis);GO:0050746(regulation of lipoprotein metabolic process);GO:0043691(reverse cholesterol transport);GO:0042632(cholesterol homeostasis);GO:0034375(high-density lipoprotein particle remodeling);GO:0032376(positive regula…	00561(Glycerolipid metabolism)	K01046	EC:3.1.1.3	lipase G, endothelial type [Source:HGNC Symbol;Acc:HGNC:6623]	MSTRG.24330.1	MSTRG.24330	.	yes	novel	trans	NA	-43.56	0.962012
ENSSSCT00000023900	0	chr1	108638412	108667299	MSTRG.966	LIPG	yes	GO:0009986(cell surface);GO:0005794(Golgi apparatus);GO:0005769(early endosome);GO:0005615(extracellular space);GO:0005576(extracellular region);GO:0055091(phospholipid homeostasis);GO:0050746(regulation of lipoprotein metabolic process);GO:0043691(reverse cholesterol transport);GO:0042632(cholesterol homeostasis);GO:0034375(high-density lipoprotein particle remodeling);GO:0032376(positive regula…	00561(Glycerolipid metabolism)	K01046	EC:3.1.1.3	lipase G, endothelial type [Source:HGNC Symbol;Acc:HGNC:6623]	MSTRG.27099.1	MSTRG.27099	GIPC2	yes	novel	trans	NA	-15.38	0.977179
ENSSSCT00000023900	0	chr1	108638412	108667299	MSTRG.966	LIPG	yes	GO:0009986(cell surface);GO:0005794(Golgi apparatus);GO:0005769(early endosome);GO:0005615(extracellular space);GO:0005576(extracellular region);GO:0055091(phospholipid homeostasis);GO:0050746(regulation of lipoprotein metabolic process);GO:0043691(reverse cholesterol transport);GO:0042632(cholesterol homeostasis);GO:0034375(high-density lipoprotein particle remodeling);GO:0032376(positive regula…	00561(Glycerolipid metabolism)	K01046	EC:3.1.1.3	lipase G, endothelial type [Source:HGNC Symbol;Acc:HGNC:6623]	MSTRG.28322.1	MSTRG.28322	ENSSSCG00000001692	yes	novel	trans	NA	-41.86	0.997123
ENSSSCT00000026411	0	chr1	129149990	129169275	MSTRG.1261	RSL24D1	yes	GO:0022625(cytosolic large ribosomal subunit);GO:0005840(ribosome);GO:0005730(nucleolus);GO:0005634(nucleus);GO:0005622(intracellular);GO:1902626(assembly of large subunit precursor of preribosome);GO:0006412(translation);GO:0000027(ribosomal large subunit assembly);GO:0003735(structural constituent of ribosome)	03010(Ribosome)	K02896	NA	ribosomal L24 domain containing 1 [Source:HGNC Symbol;Acc:HGNC:18479]	MSTRG.5076.1	MSTRG.5076	.	yes	novel	trans	NA	-28.94	0.981868
ENSSSCT00000026411	0	chr1	129149990	129169275	MSTRG.1261	RSL24D1	yes	GO:0022625(cytosolic large ribosomal subunit);GO:0005840(ribosome);GO:0005730(nucleolus);GO:0005634(nucleus);GO:0005622(intracellular);GO:1902626(assembly of large subunit precursor of preribosome);GO:0006412(translation);GO:0000027(ribosomal large subunit assembly);GO:0003735(structural constituent of ribosome)	03010(Ribosome)	K02896	NA	ribosomal L24 domain containing 1 [Source:HGNC Symbol;Acc:HGNC:18479]	MSTRG.7277.1	MSTRG.7277	.	yes	novel	trans	NA	-48.03	0.957853
ENSSSCT00000026411	0	chr1	129149990	129169275	MSTRG.1261	RSL24D1	yes	GO:0022625(cytosolic large ribosomal subunit);GO:0005840(ribosome);GO:0005730(nucleolus);GO:0005634(nucleus);GO:0005622(intracellular);GO:1902626(assembly of large subunit precursor of preribosome);GO:0006412(translation);GO:0000027(ribosomal large subunit assembly);GO:0003735(structural constituent of ribosome)	03010(Ribosome)	K02896	NA	ribosomal L24 domain containing 1 [Source:HGNC Symbol;Acc:HGNC:18479]	MSTRG.7456.1	MSTRG.7456	IL17RB	yes	novel	trans	NA	-62.26	0.966701
ENSSSCT00000026411	0	chr1	129149990	129169275	MSTRG.1261	RSL24D1	yes	GO:0022625(cytosolic large ribosomal subunit);GO:0005840(ribosome);GO:0005730(nucleolus);GO:0005634(nucleus);GO:0005622(intracellular);GO:1902626(assembly of large subunit precursor of preribosome);GO:0006412(translation);GO:0000027(ribosomal large subunit assembly);GO:0003735(structural constituent of ribosome)	03010(Ribosome)	K02896	NA	ribosomal L24 domain containing 1 [Source:HGNC Symbol;Acc:HGNC:18479]	MSTRG.8860.1	MSTRG.8860	LRCH3	yes	novel	trans	NA	-28.66	0.982838
ENSSSCT00000026411	0	chr1	129149990	129169275	MSTRG.1261	RSL24D1	yes	GO:0022625(cytosolic large ribosomal subunit);GO:0005840(ribosome);GO:0005730(nucleolus);GO:0005634(nucleus);GO:0005622(intracellular);GO:1902626(assembly of large subunit precursor of preribosome);GO:0006412(translation);GO:0000027(ribosomal large subunit assembly);GO:0003735(structural constituent of ribosome)	03010(Ribosome)	K02896	NA	ribosomal L24 domain containing 1 [Source:HGNC Symbol;Acc:HGNC:18479]	MSTRG.9166.1	MSTRG.9166	ENSSSCG00000011977	yes	novel	trans	NA	-41.68	0.99192
ENSSSCT00000026411	0	chr1	129149990	129169275	MSTRG.1261	RSL24D1	yes	GO:0022625(cytosolic large ribosomal subunit);GO:0005840(ribosome);GO:0005730(nucleolus);GO:0005634(nucleus);GO:0005622(intracellular);GO:1902626(assembly of large subunit precursor of preribosome);GO:0006412(translation);GO:0000027(ribosomal large subunit assembly);GO:0003735(structural constituent of ribosome)	03010(Ribosome)	K02896	NA	ribosomal L24 domain containing 1 [Source:HGNC Symbol;Acc:HGNC:18479]	MSTRG.11883.1	MSTRG.11883	ENSSSCG00000015692	yes	novel	trans	NA	-41.23	0.95525
ENSSSCT00000026411	0	chr1	129149990	129169275	MSTRG.1261	RSL24D1	yes	GO:0022625(cytosolic large ribosomal subunit);GO:0005840(ribosome);GO:0005730(nucleolus);GO:0005634(nucleus);GO:0005622(intracellular);GO:1902626(assembly of large subunit precursor of preribosome);GO:0006412(translation);GO:0000027(ribosomal large subunit assembly);GO:0003735(structural constituent of ribosome)	03010(Ribosome)	K02896	NA	ribosomal L24 domain containing 1 [Source:HGNC Symbol;Acc:HGNC:18479]	MSTRG.12429.1	MSTRG.12429	ENSSSCG00000015878	yes	novel	trans	NA	-53.72	0.988984
ENSSSCT00000026411	0	chr1	129149990	129169275	MSTRG.1261	RSL24D1	yes	GO:0022625(cytosolic large ribosomal subunit);GO:0005840(ribosome);GO:0005730(nucleolus);GO:0005634(nucleus);GO:0005622(intracellular);GO:1902626(assembly of large subunit precursor of preribosome);GO:0006412(translation);GO:0000027(ribosomal large subunit assembly);GO:0003735(structural constituent of ribosome)	03010(Ribosome)	K02896	NA	ribosomal L24 domain containing 1 [Source:HGNC Symbol;Acc:HGNC:18479]	MSTRG.13419.1	MSTRG.13419	.	yes	novel	trans	NA	-18.64	0.963358
ENSSSCT00000026411	0	chr1	129149990	129169275	MSTRG.1261	RSL24D1	yes	GO:0022625(cytosolic large ribosomal subunit);GO:0005840(ribosome);GO:0005730(nucleolus);GO:0005634(nucleus);GO:0005622(intracellular);GO:1902626(assembly of large subunit precursor of preribosome);GO:0006412(translation);GO:0000027(ribosomal large subunit assembly);GO:0003735(structural constituent of ribosome)	03010(Ribosome)	K02896	NA	ribosomal L24 domain containing 1 [Source:HGNC Symbol;Acc:HGNC:18479]	MSTRG.14497.1	MSTRG.14497	.	yes	novel	trans	NA	-39.19	0.963572
ENSSSCT00000026411	0	chr1	129149990	129169275	MSTRG.1261	RSL24D1	yes	GO:0022625(cytosolic large ribosomal subunit);GO:0005840(ribosome);GO:0005730(nucleolus);GO:0005634(nucleus);GO:0005622(intracellular);GO:1902626(assembly of large subunit precursor of preribosome);GO:0006412(translation);GO:0000027(ribosomal large subunit assembly);GO:0003735(structural constituent of ribosome)	03010(Ribosome)	K02896	NA	ribosomal L24 domain containing 1 [Source:HGNC Symbol;Acc:HGNC:18479]	MSTRG.15649.1	MSTRG.15649	.	yes	novel	trans	NA	-32.51	0.99348
ENSSSCT00000026411	0	chr1	129149990	129169275	MSTRG.1261	RSL24D1	yes	GO:0022625(cytosolic large ribosomal subunit);GO:0005840(ribosome);GO:0005730(nucleolus);GO:0005634(nucleus);GO:0005622(intracellular);GO:1902626(assembly of large subunit precursor of preribosome);GO:0006412(translation);GO:0000027(ribosomal large subunit assembly);GO:0003735(structural constituent of ribosome)	03010(Ribosome)	K02896	NA	ribosomal L24 domain containing 1 [Source:HGNC Symbol;Acc:HGNC:18479]	MSTRG.15971.1	MSTRG.15971	.	yes	novel	trans	NA	-35.42	0.99267
ENSSSCT00000026411	0	chr1	129149990	129169275	MSTRG.1261	RSL24D1	yes	GO:0022625(cytosolic large ribosomal subunit);GO:0005840(ribosome);GO:0005730(nucleolus);GO:0005634(nucleus);GO:0005622(intracellular);GO:1902626(assembly of large subunit precursor of preribosome);GO:0006412(translation);GO:0000027(ribosomal large subunit assembly);GO:0003735(structural constituent of ribosome)	03010(Ribosome)	K02896	NA	ribosomal L24 domain containing 1 [Source:HGNC Symbol;Acc:HGNC:18479]	MSTRG.17206.1	MSTRG.17206	.	yes	novel	trans	NA	-40.14	0.966085
ENSSSCT00000026411	0	chr1	129149990	129169275	MSTRG.1261	RSL24D1	yes	GO:0022625(cytosolic large ribosomal subunit);GO:0005840(ribosome);GO:0005730(nucleolus);GO:0005634(nucleus);GO:0005622(intracellular);GO:1902626(assembly of large subunit precursor of preribosome);GO:0006412(translation);GO:0000027(ribosomal large subunit assembly);GO:0003735(structural constituent of ribosome)	03010(Ribosome)	K02896	NA	ribosomal L24 domain containing 1 [Source:HGNC Symbol;Acc:HGNC:18479]	MSTRG.17488.1	MSTRG.17488	ZNF791	yes	novel	trans	NA	-64.73	0.984499
ENSSSCT00000026411	0	chr1	129149990	129169275	MSTRG.1261	RSL24D1	yes	GO:0022625(cytosolic large ribosomal subunit);GO:0005840(ribosome);GO:0005730(nucleolus);GO:0005634(nucleus);GO:0005622(intracellular);GO:1902626(assembly of large subunit precursor of preribosome);GO:0006412(translation);GO:0000027(ribosomal large subunit assembly);GO:0003735(structural constituent of ribosome)	03010(Ribosome)	K02896	NA	ribosomal L24 domain containing 1 [Source:HGNC Symbol;Acc:HGNC:18479]	MSTRG.20655.1	MSTRG.20655	.	yes	novel	trans	NA	-21.36	0.983871
ENSSSCT00000026411	0	chr1	129149990	129169275	MSTRG.1261	RSL24D1	yes	GO:0022625(cytosolic large ribosomal subunit);GO:0005840(ribosome);GO:0005730(nucleolus);GO:0005634(nucleus);GO:0005622(intracellular);GO:1902626(assembly of large subunit precursor of preribosome);GO:0006412(translation);GO:0000027(ribosomal large subunit assembly);GO:0003735(structural constituent of ribosome)	03010(Ribosome)	K02896	NA	ribosomal L24 domain containing 1 [Source:HGNC Symbol;Acc:HGNC:18479]	MSTRG.21494.1	MSTRG.21494	.	yes	novel	trans	NA	-49.89	0.973129
ENSSSCT00000026411	0	chr1	129149990	129169275	MSTRG.1261	RSL24D1	yes	GO:0022625(cytosolic large ribosomal subunit);GO:0005840(ribosome);GO:0005730(nucleolus);GO:0005634(nucleus);GO:0005622(intracellular);GO:1902626(assembly of large subunit precursor of preribosome);GO:0006412(translation);GO:0000027(ribosomal large subunit assembly);GO:0003735(structural constituent of ribosome)	03010(Ribosome)	K02896	NA	ribosomal L24 domain containing 1 [Source:HGNC Symbol;Acc:HGNC:18479]	MSTRG.23310.1	MSTRG.23310	.	yes	novel	trans	NA	-27.89	0.962753
ENSSSCT00000026411	0	chr1	129149990	129169275	MSTRG.1261	RSL24D1	yes	GO:0022625(cytosolic large ribosomal subunit);GO:0005840(ribosome);GO:0005730(nucleolus);GO:0005634(nucleus);GO:0005622(intracellular);GO:1902626(assembly of large subunit precursor of preribosome);GO:0006412(translation);GO:0000027(ribosomal large subunit assembly);GO:0003735(structural constituent of ribosome)	03010(Ribosome)	K02896	NA	ribosomal L24 domain containing 1 [Source:HGNC Symbol;Acc:HGNC:18479]	MSTRG.25014.1	MSTRG.25014	ADAT1	yes	novel	trans	NA	-49.49	0.994939
ENSSSCT00000026411	0	chr1	129149990	129169275	MSTRG.1261	RSL24D1	yes	GO:0022625(cytosolic large ribosomal subunit);GO:0005840(ribosome);GO:0005730(nucleolus);GO:0005634(nucleus);GO:0005622(intracellular);GO:1902626(assembly of large subunit precursor of preribosome);GO:0006412(translation);GO:0000027(ribosomal large subunit assembly);GO:0003735(structural constituent of ribosome)	03010(Ribosome)	K02896	NA	ribosomal L24 domain containing 1 [Source:HGNC Symbol;Acc:HGNC:18479]	MSTRG.26042.1	MSTRG.26042	.	yes	novel	trans	NA	-45.37	0.961558
ENSSSCT00000026411	0	chr1	129149990	129169275	MSTRG.1261	RSL24D1	yes	GO:0022625(cytosolic large ribosomal subunit);GO:0005840(ribosome);GO:0005730(nucleolus);GO:0005634(nucleus);GO:0005622(intracellular);GO:1902626(assembly of large subunit precursor of preribosome);GO:0006412(translation);GO:0000027(ribosomal large subunit assembly);GO:0003735(structural constituent of ribosome)	03010(Ribosome)	K02896	NA	ribosomal L24 domain containing 1 [Source:HGNC Symbol;Acc:HGNC:18479]	MSTRG.32620.1	MSTRG.32620	.	yes	novel	trans	NA	-27.06	0.987961
ENSSSCT00000005252	0	chr1	145394743	145504961	MSTRG.1466	INO80	yes	GO:0045111(intermediate filament cytoskeleton);GO:0031011(Ino80 complex);GO:0016604(nuclear body);GO:0005886(plasma membrane);GO:0005654(nucleoplasm);GO:0005634(nucleus);GO:2000045(regulation of G1/S transition of mitotic cell cycle);GO:0071479(cellular response to ionizing radiation);GO:0070914(UV-damage excision repair);GO:0051225(spindle assembly);GO:0045944(positive regulation of transcriptio…	NA	NA	NA	INO80 complex subunit [Source:HGNC Symbol;Acc:HGNC:26956]	MSTRG.5733.2	MSTRG.5733	U2	yes	novel	trans	NA	-38.48	0.974152
ENSSSCT00000005252	0	chr1	145394743	145504961	MSTRG.1466	INO80	yes	GO:0045111(intermediate filament cytoskeleton);GO:0031011(Ino80 complex);GO:0016604(nuclear body);GO:0005886(plasma membrane);GO:0005654(nucleoplasm);GO:0005634(nucleus);GO:2000045(regulation of G1/S transition of mitotic cell cycle);GO:0071479(cellular response to ionizing radiation);GO:0070914(UV-damage excision repair);GO:0051225(spindle assembly);GO:0045944(positive regulation of transcriptio…	NA	NA	NA	INO80 complex subunit [Source:HGNC Symbol;Acc:HGNC:26956]	MSTRG.21803.1	MSTRG.21803	.	yes	novel	trans	NA	-38.45	0.960524
ENSSSCT00000005281	0	chr1	146236241	146249502	MSTRG.1500	ENSSSCG00000004782	yes	GO:0000778(condensed nuclear chromosome kinetochore);GO:0051754(meiotic sister chromatid cohesion, centromeric);GO:0007094(mitotic spindle assembly checkpoint);GO:0006468(protein phosphorylation);GO:0004672(protein kinase activity)	NA	NA	NA	NA	MSTRG.4344.1	MSTRG.4344	.	yes	novel	trans	NA	-36.57	0.983694
ENSSSCT00000005281	0	chr1	146236241	146249502	MSTRG.1500	ENSSSCG00000004782	yes	GO:0000778(condensed nuclear chromosome kinetochore);GO:0051754(meiotic sister chromatid cohesion, centromeric);GO:0007094(mitotic spindle assembly checkpoint);GO:0006468(protein phosphorylation);GO:0004672(protein kinase activity)	NA	NA	NA	NA	MSTRG.5076.1	MSTRG.5076	.	yes	novel	trans	NA	-23.51	0.982229
ENSSSCT00000005281	0	chr1	146236241	146249502	MSTRG.1500	ENSSSCG00000004782	yes	GO:0000778(condensed nuclear chromosome kinetochore);GO:0051754(meiotic sister chromatid cohesion, centromeric);GO:0007094(mitotic spindle assembly checkpoint);GO:0006468(protein phosphorylation);GO:0004672(protein kinase activity)	NA	NA	NA	NA	MSTRG.7277.1	MSTRG.7277	.	yes	novel	trans	NA	-39.76	0.964329
ENSSSCT00000005281	0	chr1	146236241	146249502	MSTRG.1500	ENSSSCG00000004782	yes	GO:0000778(condensed nuclear chromosome kinetochore);GO:0051754(meiotic sister chromatid cohesion, centromeric);GO:0007094(mitotic spindle assembly checkpoint);GO:0006468(protein phosphorylation);GO:0004672(protein kinase activity)	NA	NA	NA	NA	MSTRG.7456.1	MSTRG.7456	IL17RB	yes	novel	trans	NA	-36.19	0.950953
ENSSSCT00000005281	0	chr1	146236241	146249502	MSTRG.1500	ENSSSCG00000004782	yes	GO:0000778(condensed nuclear chromosome kinetochore);GO:0051754(meiotic sister chromatid cohesion, centromeric);GO:0007094(mitotic spindle assembly checkpoint);GO:0006468(protein phosphorylation);GO:0004672(protein kinase activity)	NA	NA	NA	NA	MSTRG.8860.1	MSTRG.8860	LRCH3	yes	novel	trans	NA	-21.74	0.986105
ENSSSCT00000005281	0	chr1	146236241	146249502	MSTRG.1500	ENSSSCG00000004782	yes	GO:0000778(condensed nuclear chromosome kinetochore);GO:0051754(meiotic sister chromatid cohesion, centromeric);GO:0007094(mitotic spindle assembly checkpoint);GO:0006468(protein phosphorylation);GO:0004672(protein kinase activity)	NA	NA	NA	NA	MSTRG.9166.1	MSTRG.9166	ENSSSCG00000011977	yes	novel	trans	NA	-32.75	0.979027
ENSSSCT00000005281	0	chr1	146236241	146249502	MSTRG.1500	ENSSSCG00000004782	yes	GO:0000778(condensed nuclear chromosome kinetochore);GO:0051754(meiotic sister chromatid cohesion, centromeric);GO:0007094(mitotic spindle assembly checkpoint);GO:0006468(protein phosphorylation);GO:0004672(protein kinase activity)	NA	NA	NA	NA	MSTRG.11883.1	MSTRG.11883	ENSSSCG00000015692	yes	novel	trans	NA	-32.91	0.987021
ENSSSCT00000005281	0	chr1	146236241	146249502	MSTRG.1500	ENSSSCG00000004782	yes	GO:0000778(condensed nuclear chromosome kinetochore);GO:0051754(meiotic sister chromatid cohesion, centromeric);GO:0007094(mitotic spindle assembly checkpoint);GO:0006468(protein phosphorylation);GO:0004672(protein kinase activity)	NA	NA	NA	NA	MSTRG.12429.1	MSTRG.12429	ENSSSCG00000015878	yes	novel	trans	NA	-39.03	0.989813
ENSSSCT00000005281	0	chr1	146236241	146249502	MSTRG.1500	ENSSSCG00000004782	yes	GO:0000778(condensed nuclear chromosome kinetochore);GO:0051754(meiotic sister chromatid cohesion, centromeric);GO:0007094(mitotic spindle assembly checkpoint);GO:0006468(protein phosphorylation);GO:0004672(protein kinase activity)	NA	NA	NA	NA	MSTRG.15649.1	MSTRG.15649	.	yes	novel	trans	NA	-37.43	0.976578
ENSSSCT00000005281	0	chr1	146236241	146249502	MSTRG.1500	ENSSSCG00000004782	yes	GO:0000778(condensed nuclear chromosome kinetochore);GO:0051754(meiotic sister chromatid cohesion, centromeric);GO:0007094(mitotic spindle assembly checkpoint);GO:0006468(protein phosphorylation);GO:0004672(protein kinase activity)	NA	NA	NA	NA	MSTRG.15971.1	MSTRG.15971	.	yes	novel	trans	NA	-33.79	0.993343
ENSSSCT00000005281	0	chr1	146236241	146249502	MSTRG.1500	ENSSSCG00000004782	yes	GO:0000778(condensed nuclear chromosome kinetochore);GO:0051754(meiotic sister chromatid cohesion, centromeric);GO:0007094(mitotic spindle assembly checkpoint);GO:0006468(protein phosphorylation);GO:0004672(protein kinase activity)	NA	NA	NA	NA	MSTRG.17488.1	MSTRG.17488	ZNF791	yes	novel	trans	NA	-18.48	0.995784
ENSSSCT00000005281	0	chr1	146236241	146249502	MSTRG.1500	ENSSSCG00000004782	yes	GO:0000778(condensed nuclear chromosome kinetochore);GO:0051754(meiotic sister chromatid cohesion, centromeric);GO:0007094(mitotic spindle assembly checkpoint);GO:0006468(protein phosphorylation);GO:0004672(protein kinase activity)	NA	NA	NA	NA	MSTRG.20655.1	MSTRG.20655	.	yes	novel	trans	NA	-29.68	0.988749
ENSSSCT00000005281	0	chr1	146236241	146249502	MSTRG.1500	ENSSSCG00000004782	yes	GO:0000778(condensed nuclear chromosome kinetochore);GO:0051754(meiotic sister chromatid cohesion, centromeric);GO:0007094(mitotic spindle assembly checkpoint);GO:0006468(protein phosphorylation);GO:0004672(protein kinase activity)	NA	NA	NA	NA	MSTRG.23310.1	MSTRG.23310	.	yes	novel	trans	NA	-37.56	0.962008
ENSSSCT00000005281	0	chr1	146236241	146249502	MSTRG.1500	ENSSSCG00000004782	yes	GO:0000778(condensed nuclear chromosome kinetochore);GO:0051754(meiotic sister chromatid cohesion, centromeric);GO:0007094(mitotic spindle assembly checkpoint);GO:0006468(protein phosphorylation);GO:0004672(protein kinase activity)	NA	NA	NA	NA	MSTRG.25014.1	MSTRG.25014	ADAT1	yes	novel	trans	NA	-28.35	0.98434
ENSSSCT00000005281	0	chr1	146236241	146249502	MSTRG.1500	ENSSSCG00000004782	yes	GO:0000778(condensed nuclear chromosome kinetochore);GO:0051754(meiotic sister chromatid cohesion, centromeric);GO:0007094(mitotic spindle assembly checkpoint);GO:0006468(protein phosphorylation);GO:0004672(protein kinase activity)	NA	NA	NA	NA	MSTRG.26042.1	MSTRG.26042	.	yes	novel	trans	NA	-26.14	0.974411
ENSSSCT00000005281	0	chr1	146236241	146249502	MSTRG.1500	ENSSSCG00000004782	yes	GO:0000778(condensed nuclear chromosome kinetochore);GO:0051754(meiotic sister chromatid cohesion, centromeric);GO:0007094(mitotic spindle assembly checkpoint);GO:0006468(protein phosphorylation);GO:0004672(protein kinase activity)	NA	NA	NA	NA	MSTRG.32620.1	MSTRG.32620	.	yes	novel	trans	NA	-31.70	0.97619
ENSSSCT00000005396	0	chr1	175502733	175517283	MSTRG.1751	SERPINB2	yes	GO:0005615(extracellular space);GO:0043066(negative regulation of apoptotic process);GO:0010951(negative regulation of endopeptidase activity);GO:0004867(serine-type endopeptidase inhibitor activity)	05146(Amoebiasis)	K19821	NA	serpin family B member 2 [Source:HGNC Symbol;Acc:HGNC:8584]	MSTRG.5886.1	MSTRG.5886	.	yes	novel	trans	NA	-24.04	0.965306
ENSSSCT00000005396	0	chr1	175502733	175517283	MSTRG.1751	SERPINB2	yes	GO:0005615(extracellular space);GO:0043066(negative regulation of apoptotic process);GO:0010951(negative regulation of endopeptidase activity);GO:0004867(serine-type endopeptidase inhibitor activity)	05146(Amoebiasis)	K19821	NA	serpin family B member 2 [Source:HGNC Symbol;Acc:HGNC:8584]	MSTRG.8807.1	MSTRG.8807	.	yes	novel	trans	NA	-37.69	0.987499
ENSSSCT00000005396	0	chr1	175502733	175517283	MSTRG.1751	SERPINB2	yes	GO:0005615(extracellular space);GO:0043066(negative regulation of apoptotic process);GO:0010951(negative regulation of endopeptidase activity);GO:0004867(serine-type endopeptidase inhibitor activity)	05146(Amoebiasis)	K19821	NA	serpin family B member 2 [Source:HGNC Symbol;Acc:HGNC:8584]	MSTRG.10360.1	MSTRG.10360	.	yes	novel	trans	NA	-30.98	0.981493
ENSSSCT00000005396	0	chr1	175502733	175517283	MSTRG.1751	SERPINB2	yes	GO:0005615(extracellular space);GO:0043066(negative regulation of apoptotic process);GO:0010951(negative regulation of endopeptidase activity);GO:0004867(serine-type endopeptidase inhibitor activity)	05146(Amoebiasis)	K19821	NA	serpin family B member 2 [Source:HGNC Symbol;Acc:HGNC:8584]	MSTRG.15900.1	MSTRG.15900	.	yes	novel	trans	NA	-31.90	0.967367
ENSSSCT00000005396	0	chr1	175502733	175517283	MSTRG.1751	SERPINB2	yes	GO:0005615(extracellular space);GO:0043066(negative regulation of apoptotic process);GO:0010951(negative regulation of endopeptidase activity);GO:0004867(serine-type endopeptidase inhibitor activity)	05146(Amoebiasis)	K19821	NA	serpin family B member 2 [Source:HGNC Symbol;Acc:HGNC:8584]	MSTRG.16954.1	MSTRG.16954	.	yes	novel	trans	NA	-45.55	0.967885
ENSSSCT00000005396	0	chr1	175502733	175517283	MSTRG.1751	SERPINB2	yes	GO:0005615(extracellular space);GO:0043066(negative regulation of apoptotic process);GO:0010951(negative regulation of endopeptidase activity);GO:0004867(serine-type endopeptidase inhibitor activity)	05146(Amoebiasis)	K19821	NA	serpin family B member 2 [Source:HGNC Symbol;Acc:HGNC:8584]	MSTRG.16956.1	MSTRG.16956	.	yes	novel	trans	NA	-42.98	0.98286
ENSSSCT00000005396	0	chr1	175502733	175517283	MSTRG.1751	SERPINB2	yes	GO:0005615(extracellular space);GO:0043066(negative regulation of apoptotic process);GO:0010951(negative regulation of endopeptidase activity);GO:0004867(serine-type endopeptidase inhibitor activity)	05146(Amoebiasis)	K19821	NA	serpin family B member 2 [Source:HGNC Symbol;Acc:HGNC:8584]	MSTRG.18734.1	MSTRG.18734	PCDHA3	yes	novel	trans	NA	-45.67	0.950553
ENSSSCT00000005396	0	chr1	175502733	175517283	MSTRG.1751	SERPINB2	yes	GO:0005615(extracellular space);GO:0043066(negative regulation of apoptotic process);GO:0010951(negative regulation of endopeptidase activity);GO:0004867(serine-type endopeptidase inhibitor activity)	05146(Amoebiasis)	K19821	NA	serpin family B member 2 [Source:HGNC Symbol;Acc:HGNC:8584]	MSTRG.19072.1	MSTRG.19072	.	yes	novel	trans	NA	-33.49	0.965318
ENSSSCT00000005396	0	chr1	175502733	175517283	MSTRG.1751	SERPINB2	yes	GO:0005615(extracellular space);GO:0043066(negative regulation of apoptotic process);GO:0010951(negative regulation of endopeptidase activity);GO:0004867(serine-type endopeptidase inhibitor activity)	05146(Amoebiasis)	K19821	NA	serpin family B member 2 [Source:HGNC Symbol;Acc:HGNC:8584]	MSTRG.22657.1	MSTRG.22657	IGSF3	yes	novel	trans	NA	-43.75	0.959546
ENSSSCT00000005396	0	chr1	175502733	175517283	MSTRG.1751	SERPINB2	yes	GO:0005615(extracellular space);GO:0043066(negative regulation of apoptotic process);GO:0010951(negative regulation of endopeptidase activity);GO:0004867(serine-type endopeptidase inhibitor activity)	05146(Amoebiasis)	K19821	NA	serpin family B member 2 [Source:HGNC Symbol;Acc:HGNC:8584]	MSTRG.24765.1	MSTRG.24765	ACSS3	yes	novel	trans	NA	-48.82	0.969649
ENSSSCT00000005396	0	chr1	175502733	175517283	MSTRG.1751	SERPINB2	yes	GO:0005615(extracellular space);GO:0043066(negative regulation of apoptotic process);GO:0010951(negative regulation of endopeptidase activity);GO:0004867(serine-type endopeptidase inhibitor activity)	05146(Amoebiasis)	K19821	NA	serpin family B member 2 [Source:HGNC Symbol;Acc:HGNC:8584]	MSTRG.26758.1	MSTRG.26758	ENSSSCG00000027352	yes	novel	trans	NA	-46.28	0.983196
ENSSSCT00000005396	0	chr1	175502733	175517283	MSTRG.1751	SERPINB2	yes	GO:0005615(extracellular space);GO:0043066(negative regulation of apoptotic process);GO:0010951(negative regulation of endopeptidase activity);GO:0004867(serine-type endopeptidase inhibitor activity)	05146(Amoebiasis)	K19821	NA	serpin family B member 2 [Source:HGNC Symbol;Acc:HGNC:8584]	MSTRG.28979.5	MSTRG.28979	SNORA79	yes	novel	trans	NA	-22.36	0.967909
ENSSSCT00000005396	0	chr1	175502733	175517283	MSTRG.1751	SERPINB2	yes	GO:0005615(extracellular space);GO:0043066(negative regulation of apoptotic process);GO:0010951(negative regulation of endopeptidase activity);GO:0004867(serine-type endopeptidase inhibitor activity)	05146(Amoebiasis)	K19821	NA	serpin family B member 2 [Source:HGNC Symbol;Acc:HGNC:8584]	MSTRG.30173.1	MSTRG.30173	CXCL2	yes	novel	trans	NA	-52.75	0.967574
ENSSSCT00000005396	0	chr1	175502733	175517283	MSTRG.1751	SERPINB2	yes	GO:0005615(extracellular space);GO:0043066(negative regulation of apoptotic process);GO:0010951(negative regulation of endopeptidase activity);GO:0004867(serine-type endopeptidase inhibitor activity)	05146(Amoebiasis)	K19821	NA	serpin family B member 2 [Source:HGNC Symbol;Acc:HGNC:8584]	MSTRG.31692.1	MSTRG.31692	.	yes	novel	trans	NA	-40.24	0.988801
ENSSSCT00000022347	0	chr1	178852779	178857414	MSTRG.1765	ENSSSCG00000026454	yes	GO:0005739(mitochondrion);GO:0006974(cellular response to DNA damage stimulus);GO:0006919(activation of cysteine-type endopeptidase activity involved in apoptotic process);GO:0006915(apoptotic process);GO:0001836(release of cytochrome c from mitochondria)	NA	NA	NA	NA	MSTRG.5870.1	MSTRG.5870	.	yes	novel	trans	NA	-31.59	0.995562
ENSSSCT00000022347	0	chr1	178852779	178857414	MSTRG.1765	ENSSSCG00000026454	yes	GO:0005739(mitochondrion);GO:0006974(cellular response to DNA damage stimulus);GO:0006919(activation of cysteine-type endopeptidase activity involved in apoptotic process);GO:0006915(apoptotic process);GO:0001836(release of cytochrome c from mitochondria)	NA	NA	NA	NA	MSTRG.8811.1	MSTRG.8811	.	yes	novel	trans	NA	-47.27	0.951575
ENSSSCT00000022347	0	chr1	178852779	178857414	MSTRG.1765	ENSSSCG00000026454	yes	GO:0005739(mitochondrion);GO:0006974(cellular response to DNA damage stimulus);GO:0006919(activation of cysteine-type endopeptidase activity involved in apoptotic process);GO:0006915(apoptotic process);GO:0001836(release of cytochrome c from mitochondria)	NA	NA	NA	NA	MSTRG.9920.1	MSTRG.9920	.	yes	novel	trans	NA	-50.57	0.997617
ENSSSCT00000022347	0	chr1	178852779	178857414	MSTRG.1765	ENSSSCG00000026454	yes	GO:0005739(mitochondrion);GO:0006974(cellular response to DNA damage stimulus);GO:0006919(activation of cysteine-type endopeptidase activity involved in apoptotic process);GO:0006915(apoptotic process);GO:0001836(release of cytochrome c from mitochondria)	NA	NA	NA	NA	MSTRG.11550.1	MSTRG.11550	.	yes	novel	trans	NA	-35.65	0.965082
ENSSSCT00000022347	0	chr1	178852779	178857414	MSTRG.1765	ENSSSCG00000026454	yes	GO:0005739(mitochondrion);GO:0006974(cellular response to DNA damage stimulus);GO:0006919(activation of cysteine-type endopeptidase activity involved in apoptotic process);GO:0006915(apoptotic process);GO:0001836(release of cytochrome c from mitochondria)	NA	NA	NA	NA	MSTRG.11777.1	MSTRG.11777	.	yes	novel	trans	NA	-22.56	0.951413
ENSSSCT00000022347	0	chr1	178852779	178857414	MSTRG.1765	ENSSSCG00000026454	yes	GO:0005739(mitochondrion);GO:0006974(cellular response to DNA damage stimulus);GO:0006919(activation of cysteine-type endopeptidase activity involved in apoptotic process);GO:0006915(apoptotic process);GO:0001836(release of cytochrome c from mitochondria)	NA	NA	NA	NA	MSTRG.12943.1	MSTRG.12943	.	yes	novel	trans	NA	-47.74	0.982895
ENSSSCT00000022347	0	chr1	178852779	178857414	MSTRG.1765	ENSSSCG00000026454	yes	GO:0005739(mitochondrion);GO:0006974(cellular response to DNA damage stimulus);GO:0006919(activation of cysteine-type endopeptidase activity involved in apoptotic process);GO:0006915(apoptotic process);GO:0001836(release of cytochrome c from mitochondria)	NA	NA	NA	NA	MSTRG.16577.1	MSTRG.16577	.	yes	novel	trans	NA	-50.55	0.994078
ENSSSCT00000022347	0	chr1	178852779	178857414	MSTRG.1765	ENSSSCG00000026454	yes	GO:0005739(mitochondrion);GO:0006974(cellular response to DNA damage stimulus);GO:0006919(activation of cysteine-type endopeptidase activity involved in apoptotic process);GO:0006915(apoptotic process);GO:0001836(release of cytochrome c from mitochondria)	NA	NA	NA	NA	MSTRG.16579.1	MSTRG.16579	.	yes	novel	trans	NA	-41.47	0.979125
ENSSSCT00000022347	0	chr1	178852779	178857414	MSTRG.1765	ENSSSCG00000026454	yes	GO:0005739(mitochondrion);GO:0006974(cellular response to DNA damage stimulus);GO:0006919(activation of cysteine-type endopeptidase activity involved in apoptotic process);GO:0006915(apoptotic process);GO:0001836(release of cytochrome c from mitochondria)	NA	NA	NA	NA	MSTRG.16579.2	MSTRG.16579	.	yes	novel	trans	NA	-11.61	0.97933
ENSSSCT00000022347	0	chr1	178852779	178857414	MSTRG.1765	ENSSSCG00000026454	yes	GO:0005739(mitochondrion);GO:0006974(cellular response to DNA damage stimulus);GO:0006919(activation of cysteine-type endopeptidase activity involved in apoptotic process);GO:0006915(apoptotic process);GO:0001836(release of cytochrome c from mitochondria)	NA	NA	NA	NA	MSTRG.19799.1	MSTRG.19799	.	yes	novel	trans	NA	-38.12	0.966408
ENSSSCT00000022347	0	chr1	178852779	178857414	MSTRG.1765	ENSSSCG00000026454	yes	GO:0005739(mitochondrion);GO:0006974(cellular response to DNA damage stimulus);GO:0006919(activation of cysteine-type endopeptidase activity involved in apoptotic process);GO:0006915(apoptotic process);GO:0001836(release of cytochrome c from mitochondria)	NA	NA	NA	NA	MSTRG.20222.1	MSTRG.20222	.	yes	novel	trans	NA	-39.81	0.991916
ENSSSCT00000022347	0	chr1	178852779	178857414	MSTRG.1765	ENSSSCG00000026454	yes	GO:0005739(mitochondrion);GO:0006974(cellular response to DNA damage stimulus);GO:0006919(activation of cysteine-type endopeptidase activity involved in apoptotic process);GO:0006915(apoptotic process);GO:0001836(release of cytochrome c from mitochondria)	NA	NA	NA	NA	MSTRG.21596.1	MSTRG.21596	.	yes	novel	trans	NA	-40.35	0.967107
ENSSSCT00000022347	0	chr1	178852779	178857414	MSTRG.1765	ENSSSCG00000026454	yes	GO:0005739(mitochondrion);GO:0006974(cellular response to DNA damage stimulus);GO:0006919(activation of cysteine-type endopeptidase activity involved in apoptotic process);GO:0006915(apoptotic process);GO:0001836(release of cytochrome c from mitochondria)	NA	NA	NA	NA	MSTRG.21860.1	MSTRG.21860	.	yes	novel	trans	NA	-43.89	0.958416
ENSSSCT00000022347	0	chr1	178852779	178857414	MSTRG.1765	ENSSSCG00000026454	yes	GO:0005739(mitochondrion);GO:0006974(cellular response to DNA damage stimulus);GO:0006919(activation of cysteine-type endopeptidase activity involved in apoptotic process);GO:0006915(apoptotic process);GO:0001836(release of cytochrome c from mitochondria)	NA	NA	NA	NA	MSTRG.22576.1	MSTRG.22576	.	yes	novel	trans	NA	-39.21	0.954928
ENSSSCT00000022347	0	chr1	178852779	178857414	MSTRG.1765	ENSSSCG00000026454	yes	GO:0005739(mitochondrion);GO:0006974(cellular response to DNA damage stimulus);GO:0006919(activation of cysteine-type endopeptidase activity involved in apoptotic process);GO:0006915(apoptotic process);GO:0001836(release of cytochrome c from mitochondria)	NA	NA	NA	NA	MSTRG.23105.1	MSTRG.23105	.	yes	novel	trans	NA	-28.56	0.97689
ENSSSCT00000022347	0	chr1	178852779	178857414	MSTRG.1765	ENSSSCG00000026454	yes	GO:0005739(mitochondrion);GO:0006974(cellular response to DNA damage stimulus);GO:0006919(activation of cysteine-type endopeptidase activity involved in apoptotic process);GO:0006915(apoptotic process);GO:0001836(release of cytochrome c from mitochondria)	NA	NA	NA	NA	MSTRG.23177.1	MSTRG.23177	.	yes	novel	trans	NA	-41.25	0.952883
ENSSSCT00000022347	0	chr1	178852779	178857414	MSTRG.1765	ENSSSCG00000026454	yes	GO:0005739(mitochondrion);GO:0006974(cellular response to DNA damage stimulus);GO:0006919(activation of cysteine-type endopeptidase activity involved in apoptotic process);GO:0006915(apoptotic process);GO:0001836(release of cytochrome c from mitochondria)	NA	NA	NA	NA	MSTRG.24330.1	MSTRG.24330	.	yes	novel	trans	NA	-43.85	0.992346
ENSSSCT00000022347	0	chr1	178852779	178857414	MSTRG.1765	ENSSSCG00000026454	yes	GO:0005739(mitochondrion);GO:0006974(cellular response to DNA damage stimulus);GO:0006919(activation of cysteine-type endopeptidase activity involved in apoptotic process);GO:0006915(apoptotic process);GO:0001836(release of cytochrome c from mitochondria)	NA	NA	NA	NA	MSTRG.24654.1	MSTRG.24654	.	yes	novel	trans	NA	-44.19	0.9713
ENSSSCT00000022347	0	chr1	178852779	178857414	MSTRG.1765	ENSSSCG00000026454	yes	GO:0005739(mitochondrion);GO:0006974(cellular response to DNA damage stimulus);GO:0006919(activation of cysteine-type endopeptidase activity involved in apoptotic process);GO:0006915(apoptotic process);GO:0001836(release of cytochrome c from mitochondria)	NA	NA	NA	NA	MSTRG.25058.1	MSTRG.25058	.	yes	novel	trans	NA	-45.90	0.982247
ENSSSCT00000022347	0	chr1	178852779	178857414	MSTRG.1765	ENSSSCG00000026454	yes	GO:0005739(mitochondrion);GO:0006974(cellular response to DNA damage stimulus);GO:0006919(activation of cysteine-type endopeptidase activity involved in apoptotic process);GO:0006915(apoptotic process);GO:0001836(release of cytochrome c from mitochondria)	NA	NA	NA	NA	MSTRG.25553.1	MSTRG.25553	.	yes	novel	trans	NA	-42.65	0.97701
ENSSSCT00000022347	0	chr1	178852779	178857414	MSTRG.1765	ENSSSCG00000026454	yes	GO:0005739(mitochondrion);GO:0006974(cellular response to DNA damage stimulus);GO:0006919(activation of cysteine-type endopeptidase activity involved in apoptotic process);GO:0006915(apoptotic process);GO:0001836(release of cytochrome c from mitochondria)	NA	NA	NA	NA	MSTRG.26559.1	MSTRG.26559	.	yes	novel	trans	NA	-34.62	0.969388
ENSSSCT00000022347	0	chr1	178852779	178857414	MSTRG.1765	ENSSSCG00000026454	yes	GO:0005739(mitochondrion);GO:0006974(cellular response to DNA damage stimulus);GO:0006919(activation of cysteine-type endopeptidase activity involved in apoptotic process);GO:0006915(apoptotic process);GO:0001836(release of cytochrome c from mitochondria)	NA	NA	NA	NA	MSTRG.27099.1	MSTRG.27099	GIPC2	yes	novel	trans	NA	-40.64	0.980356
ENSSSCT00000022347	0	chr1	178852779	178857414	MSTRG.1765	ENSSSCG00000026454	yes	GO:0005739(mitochondrion);GO:0006974(cellular response to DNA damage stimulus);GO:0006919(activation of cysteine-type endopeptidase activity involved in apoptotic process);GO:0006915(apoptotic process);GO:0001836(release of cytochrome c from mitochondria)	NA	NA	NA	NA	MSTRG.28322.1	MSTRG.28322	ENSSSCG00000001692	yes	novel	trans	NA	-25.43	0.976213
ENSSSCT00000022347	0	chr1	178852779	178857414	MSTRG.1765	ENSSSCG00000026454	yes	GO:0005739(mitochondrion);GO:0006974(cellular response to DNA damage stimulus);GO:0006919(activation of cysteine-type endopeptidase activity involved in apoptotic process);GO:0006915(apoptotic process);GO:0001836(release of cytochrome c from mitochondria)	NA	NA	NA	NA	MSTRG.30360.1	MSTRG.30360	.	yes	novel	trans	NA	-24.50	0.958956
ENSSSCT00000024115	0	chr1	183329683	183410471	MSTRG.1865	ENSSSCG00000025135	yes	GO:0005737(cytoplasm);GO:0023014(signal transduction by protein phosphorylation);GO:0006468(protein phosphorylation);GO:0005524(ATP binding);GO:0004702(signal transducer, downstream of receptor, with serine/threonine kinase activity);GO:0004672(protein kinase activity)	04010(MAPK signaling pathway);04540(Gap junction);04921(Oxytocin signaling pathway);04722(Neurotrophin signaling pathway)	NA	NA	NA	MSTRG.4531.1	MSTRG.4531	.	yes	novel	trans	NA	-37.00	0.958388
ENSSSCT00000024115	0	chr1	183329683	183410471	MSTRG.1865	ENSSSCG00000025135	yes	GO:0005737(cytoplasm);GO:0023014(signal transduction by protein phosphorylation);GO:0006468(protein phosphorylation);GO:0005524(ATP binding);GO:0004702(signal transducer, downstream of receptor, with serine/threonine kinase activity);GO:0004672(protein kinase activity)	04010(MAPK signaling pathway);04540(Gap junction);04921(Oxytocin signaling pathway);04722(Neurotrophin signaling pathway)	NA	NA	NA	MSTRG.4842.1	MSTRG.4842	.	yes	novel	trans	NA	-27.69	0.987036
ENSSSCT00000024115	0	chr1	183329683	183410471	MSTRG.1865	ENSSSCG00000025135	yes	GO:0005737(cytoplasm);GO:0023014(signal transduction by protein phosphorylation);GO:0006468(protein phosphorylation);GO:0005524(ATP binding);GO:0004702(signal transducer, downstream of receptor, with serine/threonine kinase activity);GO:0004672(protein kinase activity)	04010(MAPK signaling pathway);04540(Gap junction);04921(Oxytocin signaling pathway);04722(Neurotrophin signaling pathway)	NA	NA	NA	MSTRG.6447.1	MSTRG.6447	.	yes	novel	trans	NA	-31.82	0.974422
ENSSSCT00000024115	0	chr1	183329683	183410471	MSTRG.1865	ENSSSCG00000025135	yes	GO:0005737(cytoplasm);GO:0023014(signal transduction by protein phosphorylation);GO:0006468(protein phosphorylation);GO:0005524(ATP binding);GO:0004702(signal transducer, downstream of receptor, with serine/threonine kinase activity);GO:0004672(protein kinase activity)	04010(MAPK signaling pathway);04540(Gap junction);04921(Oxytocin signaling pathway);04722(Neurotrophin signaling pathway)	NA	NA	NA	MSTRG.9553.1	MSTRG.9553	XPO7	yes	novel	trans	NA	-14.61	-0.955387
ENSSSCT00000024115	0	chr1	183329683	183410471	MSTRG.1865	ENSSSCG00000025135	yes	GO:0005737(cytoplasm);GO:0023014(signal transduction by protein phosphorylation);GO:0006468(protein phosphorylation);GO:0005524(ATP binding);GO:0004702(signal transducer, downstream of receptor, with serine/threonine kinase activity);GO:0004672(protein kinase activity)	04010(MAPK signaling pathway);04540(Gap junction);04921(Oxytocin signaling pathway);04722(Neurotrophin signaling pathway)	NA	NA	NA	MSTRG.10833.1	MSTRG.10833	.	yes	novel	trans	NA	-16.86	0.953905
ENSSSCT00000024115	0	chr1	183329683	183410471	MSTRG.1865	ENSSSCG00000025135	yes	GO:0005737(cytoplasm);GO:0023014(signal transduction by protein phosphorylation);GO:0006468(protein phosphorylation);GO:0005524(ATP binding);GO:0004702(signal transducer, downstream of receptor, with serine/threonine kinase activity);GO:0004672(protein kinase activity)	04010(MAPK signaling pathway);04540(Gap junction);04921(Oxytocin signaling pathway);04722(Neurotrophin signaling pathway)	NA	NA	NA	MSTRG.11777.1	MSTRG.11777	.	yes	novel	trans	NA	-29.91	0.950692
ENSSSCT00000024115	0	chr1	183329683	183410471	MSTRG.1865	ENSSSCG00000025135	yes	GO:0005737(cytoplasm);GO:0023014(signal transduction by protein phosphorylation);GO:0006468(protein phosphorylation);GO:0005524(ATP binding);GO:0004702(signal transducer, downstream of receptor, with serine/threonine kinase activity);GO:0004672(protein kinase activity)	04010(MAPK signaling pathway);04540(Gap junction);04921(Oxytocin signaling pathway);04722(Neurotrophin signaling pathway)	NA	NA	NA	MSTRG.13394.1	MSTRG.13394	.	yes	novel	trans	NA	-29.73	-0.984745
ENSSSCT00000024115	0	chr1	183329683	183410471	MSTRG.1865	ENSSSCG00000025135	yes	GO:0005737(cytoplasm);GO:0023014(signal transduction by protein phosphorylation);GO:0006468(protein phosphorylation);GO:0005524(ATP binding);GO:0004702(signal transducer, downstream of receptor, with serine/threonine kinase activity);GO:0004672(protein kinase activity)	04010(MAPK signaling pathway);04540(Gap junction);04921(Oxytocin signaling pathway);04722(Neurotrophin signaling pathway)	NA	NA	NA	MSTRG.15360.1	MSTRG.15360	.	yes	novel	trans	NA	-26.61	-0.952568
ENSSSCT00000024115	0	chr1	183329683	183410471	MSTRG.1865	ENSSSCG00000025135	yes	GO:0005737(cytoplasm);GO:0023014(signal transduction by protein phosphorylation);GO:0006468(protein phosphorylation);GO:0005524(ATP binding);GO:0004702(signal transducer, downstream of receptor, with serine/threonine kinase activity);GO:0004672(protein kinase activity)	04010(MAPK signaling pathway);04540(Gap junction);04921(Oxytocin signaling pathway);04722(Neurotrophin signaling pathway)	NA	NA	NA	MSTRG.24958.1	MSTRG.24958	.	yes	novel	trans	NA	-35.80	0.967217
ENSSSCT00000024115	0	chr1	183329683	183410471	MSTRG.1865	ENSSSCG00000025135	yes	GO:0005737(cytoplasm);GO:0023014(signal transduction by protein phosphorylation);GO:0006468(protein phosphorylation);GO:0005524(ATP binding);GO:0004702(signal transducer, downstream of receptor, with serine/threonine kinase activity);GO:0004672(protein kinase activity)	04010(MAPK signaling pathway);04540(Gap junction);04921(Oxytocin signaling pathway);04722(Neurotrophin signaling pathway)	NA	NA	NA	MSTRG.28525.1	MSTRG.28525	.	yes	novel	trans	NA	-42.03	0.989839
ENSSSCT00000024115	0	chr1	183329683	183410471	MSTRG.1865	ENSSSCG00000025135	yes	GO:0005737(cytoplasm);GO:0023014(signal transduction by protein phosphorylation);GO:0006468(protein phosphorylation);GO:0005524(ATP binding);GO:0004702(signal transducer, downstream of receptor, with serine/threonine kinase activity);GO:0004672(protein kinase activity)	04010(MAPK signaling pathway);04540(Gap junction);04921(Oxytocin signaling pathway);04722(Neurotrophin signaling pathway)	NA	NA	NA	MSTRG.28740.1	MSTRG.28740	.	yes	novel	trans	NA	-29.57	-0.973192
ENSSSCT00000024115	0	chr1	183329683	183410471	MSTRG.1865	ENSSSCG00000025135	yes	GO:0005737(cytoplasm);GO:0023014(signal transduction by protein phosphorylation);GO:0006468(protein phosphorylation);GO:0005524(ATP binding);GO:0004702(signal transducer, downstream of receptor, with serine/threonine kinase activity);GO:0004672(protein kinase activity)	04010(MAPK signaling pathway);04540(Gap junction);04921(Oxytocin signaling pathway);04722(Neurotrophin signaling pathway)	NA	NA	NA	MSTRG.29455.1	MSTRG.29455	ENSSSCG00000002451	yes	novel	trans	NA	-15.91	0.954066
ENSSSCT00000024115	0	chr1	183329683	183410471	MSTRG.1865	ENSSSCG00000025135	yes	GO:0005737(cytoplasm);GO:0023014(signal transduction by protein phosphorylation);GO:0006468(protein phosphorylation);GO:0005524(ATP binding);GO:0004702(signal transducer, downstream of receptor, with serine/threonine kinase activity);GO:0004672(protein kinase activity)	04010(MAPK signaling pathway);04540(Gap junction);04921(Oxytocin signaling pathway);04722(Neurotrophin signaling pathway)	NA	NA	NA	MSTRG.32294.1	MSTRG.32294	.	yes	novel	trans	NA	-29.95	0.986098
ENSSSCT00000036194	0	chr1	183329729	183510087	MSTRG.1865	ENSSSCG00000025135	yes	GO:0005737(cytoplasm);GO:0023014(signal transduction by protein phosphorylation);GO:0006468(protein phosphorylation);GO:0005524(ATP binding);GO:0004702(signal transducer, downstream of receptor, with serine/threonine kinase activity);GO:0004672(protein kinase activity)	04010(MAPK signaling pathway);04540(Gap junction);04921(Oxytocin signaling pathway);04722(Neurotrophin signaling pathway)	NA	NA	NA	MSTRG.4592.1	MSTRG.4592	.	yes	novel	trans	NA	-52.64	-0.971091
ENSSSCT00000036194	0	chr1	183329729	183510087	MSTRG.1865	ENSSSCG00000025135	yes	GO:0005737(cytoplasm);GO:0023014(signal transduction by protein phosphorylation);GO:0006468(protein phosphorylation);GO:0005524(ATP binding);GO:0004702(signal transducer, downstream of receptor, with serine/threonine kinase activity);GO:0004672(protein kinase activity)	04010(MAPK signaling pathway);04540(Gap junction);04921(Oxytocin signaling pathway);04722(Neurotrophin signaling pathway)	NA	NA	NA	MSTRG.4625.3	MSTRG.4625	.	yes	novel	trans	NA	-35.19	-0.973101
ENSSSCT00000036194	0	chr1	183329729	183510087	MSTRG.1865	ENSSSCG00000025135	yes	GO:0005737(cytoplasm);GO:0023014(signal transduction by protein phosphorylation);GO:0006468(protein phosphorylation);GO:0005524(ATP binding);GO:0004702(signal transducer, downstream of receptor, with serine/threonine kinase activity);GO:0004672(protein kinase activity)	04010(MAPK signaling pathway);04540(Gap junction);04921(Oxytocin signaling pathway);04722(Neurotrophin signaling pathway)	NA	NA	NA	MSTRG.5643.1	MSTRG.5643	MYL4	yes	novel	trans	NA	-42.42	0.987623
ENSSSCT00000036194	0	chr1	183329729	183510087	MSTRG.1865	ENSSSCG00000025135	yes	GO:0005737(cytoplasm);GO:0023014(signal transduction by protein phosphorylation);GO:0006468(protein phosphorylation);GO:0005524(ATP binding);GO:0004702(signal transducer, downstream of receptor, with serine/threonine kinase activity);GO:0004672(protein kinase activity)	04010(MAPK signaling pathway);04540(Gap junction);04921(Oxytocin signaling pathway);04722(Neurotrophin signaling pathway)	NA	NA	NA	MSTRG.6301.1	MSTRG.6301	.	yes	novel	trans	NA	-42.87	-0.974433
ENSSSCT00000036194	0	chr1	183329729	183510087	MSTRG.1865	ENSSSCG00000025135	yes	GO:0005737(cytoplasm);GO:0023014(signal transduction by protein phosphorylation);GO:0006468(protein phosphorylation);GO:0005524(ATP binding);GO:0004702(signal transducer, downstream of receptor, with serine/threonine kinase activity);GO:0004672(protein kinase activity)	04010(MAPK signaling pathway);04540(Gap junction);04921(Oxytocin signaling pathway);04722(Neurotrophin signaling pathway)	NA	NA	NA	MSTRG.6500.1	MSTRG.6500	.	yes	novel	trans	NA	-34.14	-0.988892
ENSSSCT00000036194	0	chr1	183329729	183510087	MSTRG.1865	ENSSSCG00000025135	yes	GO:0005737(cytoplasm);GO:0023014(signal transduction by protein phosphorylation);GO:0006468(protein phosphorylation);GO:0005524(ATP binding);GO:0004702(signal transducer, downstream of receptor, with serine/threonine kinase activity);GO:0004672(protein kinase activity)	04010(MAPK signaling pathway);04540(Gap junction);04921(Oxytocin signaling pathway);04722(Neurotrophin signaling pathway)	NA	NA	NA	MSTRG.7456.1	MSTRG.7456	IL17RB	yes	novel	trans	NA	-45.86	0.95192
ENSSSCT00000036194	0	chr1	183329729	183510087	MSTRG.1865	ENSSSCG00000025135	yes	GO:0005737(cytoplasm);GO:0023014(signal transduction by protein phosphorylation);GO:0006468(protein phosphorylation);GO:0005524(ATP binding);GO:0004702(signal transducer, downstream of receptor, with serine/threonine kinase activity);GO:0004672(protein kinase activity)	04010(MAPK signaling pathway);04540(Gap junction);04921(Oxytocin signaling pathway);04722(Neurotrophin signaling pathway)	NA	NA	NA	MSTRG.8882.1	MSTRG.8882	.	yes	novel	trans	NA	-37.56	0.962579
ENSSSCT00000036194	0	chr1	183329729	183510087	MSTRG.1865	ENSSSCG00000025135	yes	GO:0005737(cytoplasm);GO:0023014(signal transduction by protein phosphorylation);GO:0006468(protein phosphorylation);GO:0005524(ATP binding);GO:0004702(signal transducer, downstream of receptor, with serine/threonine kinase activity);GO:0004672(protein kinase activity)	04010(MAPK signaling pathway);04540(Gap junction);04921(Oxytocin signaling pathway);04722(Neurotrophin signaling pathway)	NA	NA	NA	MSTRG.9389.1	MSTRG.9389	ENSSSCG00000030480	yes	novel	trans	NA	-43.94	0.976287
ENSSSCT00000036194	0	chr1	183329729	183510087	MSTRG.1865	ENSSSCG00000025135	yes	GO:0005737(cytoplasm);GO:0023014(signal transduction by protein phosphorylation);GO:0006468(protein phosphorylation);GO:0005524(ATP binding);GO:0004702(signal transducer, downstream of receptor, with serine/threonine kinase activity);GO:0004672(protein kinase activity)	04010(MAPK signaling pathway);04540(Gap junction);04921(Oxytocin signaling pathway);04722(Neurotrophin signaling pathway)	NA	NA	NA	MSTRG.11081.1	MSTRG.11081	.	yes	novel	trans	NA	-43.81	0.974825
ENSSSCT00000036194	0	chr1	183329729	183510087	MSTRG.1865	ENSSSCG00000025135	yes	GO:0005737(cytoplasm);GO:0023014(signal transduction by protein phosphorylation);GO:0006468(protein phosphorylation);GO:0005524(ATP binding);GO:0004702(signal transducer, downstream of receptor, with serine/threonine kinase activity);GO:0004672(protein kinase activity)	04010(MAPK signaling pathway);04540(Gap junction);04921(Oxytocin signaling pathway);04722(Neurotrophin signaling pathway)	NA	NA	NA	MSTRG.11777.1	MSTRG.11777	.	yes	novel	trans	NA	-41.43	-0.962974
ENSSSCT00000036194	0	chr1	183329729	183510087	MSTRG.1865	ENSSSCG00000025135	yes	GO:0005737(cytoplasm);GO:0023014(signal transduction by protein phosphorylation);GO:0006468(protein phosphorylation);GO:0005524(ATP binding);GO:0004702(signal transducer, downstream of receptor, with serine/threonine kinase activity);GO:0004672(protein kinase activity)	04010(MAPK signaling pathway);04540(Gap junction);04921(Oxytocin signaling pathway);04722(Neurotrophin signaling pathway)	NA	NA	NA	MSTRG.12511.1	MSTRG.12511	.	yes	novel	trans	NA	-30.66	-0.953295
ENSSSCT00000036194	0	chr1	183329729	183510087	MSTRG.1865	ENSSSCG00000025135	yes	GO:0005737(cytoplasm);GO:0023014(signal transduction by protein phosphorylation);GO:0006468(protein phosphorylation);GO:0005524(ATP binding);GO:0004702(signal transducer, downstream of receptor, with serine/threonine kinase activity);GO:0004672(protein kinase activity)	04010(MAPK signaling pathway);04540(Gap junction);04921(Oxytocin signaling pathway);04722(Neurotrophin signaling pathway)	NA	NA	NA	MSTRG.13663.1	MSTRG.13663	.	yes	novel	trans	NA	-33.81	-0.990137
ENSSSCT00000036194	0	chr1	183329729	183510087	MSTRG.1865	ENSSSCG00000025135	yes	GO:0005737(cytoplasm);GO:0023014(signal transduction by protein phosphorylation);GO:0006468(protein phosphorylation);GO:0005524(ATP binding);GO:0004702(signal transducer, downstream of receptor, with serine/threonine kinase activity);GO:0004672(protein kinase activity)	04010(MAPK signaling pathway);04540(Gap junction);04921(Oxytocin signaling pathway);04722(Neurotrophin signaling pathway)	NA	NA	NA	MSTRG.14046.1	MSTRG.14046	.	yes	novel	trans	NA	-19.16	-0.962157
ENSSSCT00000036194	0	chr1	183329729	183510087	MSTRG.1865	ENSSSCG00000025135	yes	GO:0005737(cytoplasm);GO:0023014(signal transduction by protein phosphorylation);GO:0006468(protein phosphorylation);GO:0005524(ATP binding);GO:0004702(signal transducer, downstream of receptor, with serine/threonine kinase activity);GO:0004672(protein kinase activity)	04010(MAPK signaling pathway);04540(Gap junction);04921(Oxytocin signaling pathway);04722(Neurotrophin signaling pathway)	NA	NA	NA	MSTRG.14254.1	MSTRG.14254	.	yes	novel	trans	NA	-13.71	-0.962478
ENSSSCT00000036194	0	chr1	183329729	183510087	MSTRG.1865	ENSSSCG00000025135	yes	GO:0005737(cytoplasm);GO:0023014(signal transduction by protein phosphorylation);GO:0006468(protein phosphorylation);GO:0005524(ATP binding);GO:0004702(signal transducer, downstream of receptor, with serine/threonine kinase activity);GO:0004672(protein kinase activity)	04010(MAPK signaling pathway);04540(Gap junction);04921(Oxytocin signaling pathway);04722(Neurotrophin signaling pathway)	NA	NA	NA	MSTRG.15360.1	MSTRG.15360	.	yes	novel	trans	NA	-38.29	0.972068
ENSSSCT00000036194	0	chr1	183329729	183510087	MSTRG.1865	ENSSSCG00000025135	yes	GO:0005737(cytoplasm);GO:0023014(signal transduction by protein phosphorylation);GO:0006468(protein phosphorylation);GO:0005524(ATP binding);GO:0004702(signal transducer, downstream of receptor, with serine/threonine kinase activity);GO:0004672(protein kinase activity)	04010(MAPK signaling pathway);04540(Gap junction);04921(Oxytocin signaling pathway);04722(Neurotrophin signaling pathway)	NA	NA	NA	MSTRG.17183.1	MSTRG.17183	.	yes	novel	trans	NA	-38.87	0.952115
ENSSSCT00000036194	0	chr1	183329729	183510087	MSTRG.1865	ENSSSCG00000025135	yes	GO:0005737(cytoplasm);GO:0023014(signal transduction by protein phosphorylation);GO:0006468(protein phosphorylation);GO:0005524(ATP binding);GO:0004702(signal transducer, downstream of receptor, with serine/threonine kinase activity);GO:0004672(protein kinase activity)	04010(MAPK signaling pathway);04540(Gap junction);04921(Oxytocin signaling pathway);04722(Neurotrophin signaling pathway)	NA	NA	NA	MSTRG.17206.1	MSTRG.17206	.	yes	novel	trans	NA	-37.31	0.957182
ENSSSCT00000036194	0	chr1	183329729	183510087	MSTRG.1865	ENSSSCG00000025135	yes	GO:0005737(cytoplasm);GO:0023014(signal transduction by protein phosphorylation);GO:0006468(protein phosphorylation);GO:0005524(ATP binding);GO:0004702(signal transducer, downstream of receptor, with serine/threonine kinase activity);GO:0004672(protein kinase activity)	04010(MAPK signaling pathway);04540(Gap junction);04921(Oxytocin signaling pathway);04722(Neurotrophin signaling pathway)	NA	NA	NA	MSTRG.19520.1	MSTRG.19520	.	yes	novel	trans	NA	-37.39	-0.964348
ENSSSCT00000036194	0	chr1	183329729	183510087	MSTRG.1865	ENSSSCG00000025135	yes	GO:0005737(cytoplasm);GO:0023014(signal transduction by protein phosphorylation);GO:0006468(protein phosphorylation);GO:0005524(ATP binding);GO:0004702(signal transducer, downstream of receptor, with serine/threonine kinase activity);GO:0004672(protein kinase activity)	04010(MAPK signaling pathway);04540(Gap junction);04921(Oxytocin signaling pathway);04722(Neurotrophin signaling pathway)	NA	NA	NA	MSTRG.19762.1	MSTRG.19762	.	yes	novel	trans	NA	-40.55	-0.951678
ENSSSCT00000036194	0	chr1	183329729	183510087	MSTRG.1865	ENSSSCG00000025135	yes	GO:0005737(cytoplasm);GO:0023014(signal transduction by protein phosphorylation);GO:0006468(protein phosphorylation);GO:0005524(ATP binding);GO:0004702(signal transducer, downstream of receptor, with serine/threonine kinase activity);GO:0004672(protein kinase activity)	04010(MAPK signaling pathway);04540(Gap junction);04921(Oxytocin signaling pathway);04722(Neurotrophin signaling pathway)	NA	NA	NA	MSTRG.20540.1	MSTRG.20540	.	yes	novel	trans	NA	-30.38	0.984189
ENSSSCT00000036194	0	chr1	183329729	183510087	MSTRG.1865	ENSSSCG00000025135	yes	GO:0005737(cytoplasm);GO:0023014(signal transduction by protein phosphorylation);GO:0006468(protein phosphorylation);GO:0005524(ATP binding);GO:0004702(signal transducer, downstream of receptor, with serine/threonine kinase activity);GO:0004672(protein kinase activity)	04010(MAPK signaling pathway);04540(Gap junction);04921(Oxytocin signaling pathway);04722(Neurotrophin signaling pathway)	NA	NA	NA	MSTRG.21860.1	MSTRG.21860	.	yes	novel	trans	NA	-42.78	-0.973084
ENSSSCT00000036194	0	chr1	183329729	183510087	MSTRG.1865	ENSSSCG00000025135	yes	GO:0005737(cytoplasm);GO:0023014(signal transduction by protein phosphorylation);GO:0006468(protein phosphorylation);GO:0005524(ATP binding);GO:0004702(signal transducer, downstream of receptor, with serine/threonine kinase activity);GO:0004672(protein kinase activity)	04010(MAPK signaling pathway);04540(Gap junction);04921(Oxytocin signaling pathway);04722(Neurotrophin signaling pathway)	NA	NA	NA	MSTRG.22503.1	MSTRG.22503	CIART	yes	novel	trans	NA	-50.00	-0.966354
ENSSSCT00000036194	0	chr1	183329729	183510087	MSTRG.1865	ENSSSCG00000025135	yes	GO:0005737(cytoplasm);GO:0023014(signal transduction by protein phosphorylation);GO:0006468(protein phosphorylation);GO:0005524(ATP binding);GO:0004702(signal transducer, downstream of receptor, with serine/threonine kinase activity);GO:0004672(protein kinase activity)	04010(MAPK signaling pathway);04540(Gap junction);04921(Oxytocin signaling pathway);04722(Neurotrophin signaling pathway)	NA	NA	NA	MSTRG.22782.1	MSTRG.22782	.	yes	novel	trans	NA	-21.77	-0.968211
ENSSSCT00000036194	0	chr1	183329729	183510087	MSTRG.1865	ENSSSCG00000025135	yes	GO:0005737(cytoplasm);GO:0023014(signal transduction by protein phosphorylation);GO:0006468(protein phosphorylation);GO:0005524(ATP binding);GO:0004702(signal transducer, downstream of receptor, with serine/threonine kinase activity);GO:0004672(protein kinase activity)	04010(MAPK signaling pathway);04540(Gap junction);04921(Oxytocin signaling pathway);04722(Neurotrophin signaling pathway)	NA	NA	NA	MSTRG.23105.1	MSTRG.23105	.	yes	novel	trans	NA	-34.32	-0.964291
ENSSSCT00000036194	0	chr1	183329729	183510087	MSTRG.1865	ENSSSCG00000025135	yes	GO:0005737(cytoplasm);GO:0023014(signal transduction by protein phosphorylation);GO:0006468(protein phosphorylation);GO:0005524(ATP binding);GO:0004702(signal transducer, downstream of receptor, with serine/threonine kinase activity);GO:0004672(protein kinase activity)	04010(MAPK signaling pathway);04540(Gap junction);04921(Oxytocin signaling pathway);04722(Neurotrophin signaling pathway)	NA	NA	NA	MSTRG.23881.1	MSTRG.23881	.	yes	novel	trans	NA	-37.13	-0.952506
ENSSSCT00000036194	0	chr1	183329729	183510087	MSTRG.1865	ENSSSCG00000025135	yes	GO:0005737(cytoplasm);GO:0023014(signal transduction by protein phosphorylation);GO:0006468(protein phosphorylation);GO:0005524(ATP binding);GO:0004702(signal transducer, downstream of receptor, with serine/threonine kinase activity);GO:0004672(protein kinase activity)	04010(MAPK signaling pathway);04540(Gap junction);04921(Oxytocin signaling pathway);04722(Neurotrophin signaling pathway)	NA	NA	NA	MSTRG.24277.1	MSTRG.24277	.	yes	novel	trans	NA	-47.67	-0.98601
ENSSSCT00000036194	0	chr1	183329729	183510087	MSTRG.1865	ENSSSCG00000025135	yes	GO:0005737(cytoplasm);GO:0023014(signal transduction by protein phosphorylation);GO:0006468(protein phosphorylation);GO:0005524(ATP binding);GO:0004702(signal transducer, downstream of receptor, with serine/threonine kinase activity);GO:0004672(protein kinase activity)	04010(MAPK signaling pathway);04540(Gap junction);04921(Oxytocin signaling pathway);04722(Neurotrophin signaling pathway)	NA	NA	NA	MSTRG.24605.1	MSTRG.24605	.	yes	novel	trans	NA	-43.22	-0.950338
ENSSSCT00000036194	0	chr1	183329729	183510087	MSTRG.1865	ENSSSCG00000025135	yes	GO:0005737(cytoplasm);GO:0023014(signal transduction by protein phosphorylation);GO:0006468(protein phosphorylation);GO:0005524(ATP binding);GO:0004702(signal transducer, downstream of receptor, with serine/threonine kinase activity);GO:0004672(protein kinase activity)	04010(MAPK signaling pathway);04540(Gap junction);04921(Oxytocin signaling pathway);04722(Neurotrophin signaling pathway)	NA	NA	NA	MSTRG.24799.1	MSTRG.24799	.	yes	novel	trans	NA	-16.38	-0.979209
ENSSSCT00000036194	0	chr1	183329729	183510087	MSTRG.1865	ENSSSCG00000025135	yes	GO:0005737(cytoplasm);GO:0023014(signal transduction by protein phosphorylation);GO:0006468(protein phosphorylation);GO:0005524(ATP binding);GO:0004702(signal transducer, downstream of receptor, with serine/threonine kinase activity);GO:0004672(protein kinase activity)	04010(MAPK signaling pathway);04540(Gap junction);04921(Oxytocin signaling pathway);04722(Neurotrophin signaling pathway)	NA	NA	NA	MSTRG.26444.1	MSTRG.26444	.	yes	novel	trans	NA	-38.39	-0.966064
ENSSSCT00000036194	0	chr1	183329729	183510087	MSTRG.1865	ENSSSCG00000025135	yes	GO:0005737(cytoplasm);GO:0023014(signal transduction by protein phosphorylation);GO:0006468(protein phosphorylation);GO:0005524(ATP binding);GO:0004702(signal transducer, downstream of receptor, with serine/threonine kinase activity);GO:0004672(protein kinase activity)	04010(MAPK signaling pathway);04540(Gap junction);04921(Oxytocin signaling pathway);04722(Neurotrophin signaling pathway)	NA	NA	NA	MSTRG.26559.1	MSTRG.26559	.	yes	novel	trans	NA	-45.53	-0.952193
ENSSSCT00000036194	0	chr1	183329729	183510087	MSTRG.1865	ENSSSCG00000025135	yes	GO:0005737(cytoplasm);GO:0023014(signal transduction by protein phosphorylation);GO:0006468(protein phosphorylation);GO:0005524(ATP binding);GO:0004702(signal transducer, downstream of receptor, with serine/threonine kinase activity);GO:0004672(protein kinase activity)	04010(MAPK signaling pathway);04540(Gap junction);04921(Oxytocin signaling pathway);04722(Neurotrophin signaling pathway)	NA	NA	NA	MSTRG.26758.1	MSTRG.26758	ENSSSCG00000027352	yes	novel	trans	NA	-47.99	-0.961304
ENSSSCT00000036194	0	chr1	183329729	183510087	MSTRG.1865	ENSSSCG00000025135	yes	GO:0005737(cytoplasm);GO:0023014(signal transduction by protein phosphorylation);GO:0006468(protein phosphorylation);GO:0005524(ATP binding);GO:0004702(signal transducer, downstream of receptor, with serine/threonine kinase activity);GO:0004672(protein kinase activity)	04010(MAPK signaling pathway);04540(Gap junction);04921(Oxytocin signaling pathway);04722(Neurotrophin signaling pathway)	NA	NA	NA	MSTRG.27332.1	MSTRG.27332	.	yes	novel	trans	NA	-41.60	-0.975708
ENSSSCT00000036194	0	chr1	183329729	183510087	MSTRG.1865	ENSSSCG00000025135	yes	GO:0005737(cytoplasm);GO:0023014(signal transduction by protein phosphorylation);GO:0006468(protein phosphorylation);GO:0005524(ATP binding);GO:0004702(signal transducer, downstream of receptor, with serine/threonine kinase activity);GO:0004672(protein kinase activity)	04010(MAPK signaling pathway);04540(Gap junction);04921(Oxytocin signaling pathway);04722(Neurotrophin signaling pathway)	NA	NA	NA	MSTRG.27711.1	MSTRG.27711	.	yes	novel	trans	NA	-37.19	0.986629
ENSSSCT00000036194	0	chr1	183329729	183510087	MSTRG.1865	ENSSSCG00000025135	yes	GO:0005737(cytoplasm);GO:0023014(signal transduction by protein phosphorylation);GO:0006468(protein phosphorylation);GO:0005524(ATP binding);GO:0004702(signal transducer, downstream of receptor, with serine/threonine kinase activity);GO:0004672(protein kinase activity)	04010(MAPK signaling pathway);04540(Gap junction);04921(Oxytocin signaling pathway);04722(Neurotrophin signaling pathway)	NA	NA	NA	MSTRG.28025.1	MSTRG.28025	.	yes	novel	trans	NA	-39.89	-0.981018
ENSSSCT00000036194	0	chr1	183329729	183510087	MSTRG.1865	ENSSSCG00000025135	yes	GO:0005737(cytoplasm);GO:0023014(signal transduction by protein phosphorylation);GO:0006468(protein phosphorylation);GO:0005524(ATP binding);GO:0004702(signal transducer, downstream of receptor, with serine/threonine kinase activity);GO:0004672(protein kinase activity)	04010(MAPK signaling pathway);04540(Gap junction);04921(Oxytocin signaling pathway);04722(Neurotrophin signaling pathway)	NA	NA	NA	MSTRG.28708.1	MSTRG.28708	.	yes	novel	trans	NA	-36.30	-0.97864
ENSSSCT00000036194	0	chr1	183329729	183510087	MSTRG.1865	ENSSSCG00000025135	yes	GO:0005737(cytoplasm);GO:0023014(signal transduction by protein phosphorylation);GO:0006468(protein phosphorylation);GO:0005524(ATP binding);GO:0004702(signal transducer, downstream of receptor, with serine/threonine kinase activity);GO:0004672(protein kinase activity)	04010(MAPK signaling pathway);04540(Gap junction);04921(Oxytocin signaling pathway);04722(Neurotrophin signaling pathway)	NA	NA	NA	MSTRG.28976.1	MSTRG.28976	.	yes	novel	trans	NA	-32.26	-0.95519
ENSSSCT00000036194	0	chr1	183329729	183510087	MSTRG.1865	ENSSSCG00000025135	yes	GO:0005737(cytoplasm);GO:0023014(signal transduction by protein phosphorylation);GO:0006468(protein phosphorylation);GO:0005524(ATP binding);GO:0004702(signal transducer, downstream of receptor, with serine/threonine kinase activity);GO:0004672(protein kinase activity)	04010(MAPK signaling pathway);04540(Gap junction);04921(Oxytocin signaling pathway);04722(Neurotrophin signaling pathway)	NA	NA	NA	MSTRG.29455.1	MSTRG.29455	ENSSSCG00000002451	yes	novel	trans	NA	-51.06	-0.96261
ENSSSCT00000036194	0	chr1	183329729	183510087	MSTRG.1865	ENSSSCG00000025135	yes	GO:0005737(cytoplasm);GO:0023014(signal transduction by protein phosphorylation);GO:0006468(protein phosphorylation);GO:0005524(ATP binding);GO:0004702(signal transducer, downstream of receptor, with serine/threonine kinase activity);GO:0004672(protein kinase activity)	04010(MAPK signaling pathway);04540(Gap junction);04921(Oxytocin signaling pathway);04722(Neurotrophin signaling pathway)	NA	NA	NA	MSTRG.30173.1	MSTRG.30173	CXCL2	yes	novel	trans	NA	-44.83	-0.97962
ENSSSCT00000036194	0	chr1	183329729	183510087	MSTRG.1865	ENSSSCG00000025135	yes	GO:0005737(cytoplasm);GO:0023014(signal transduction by protein phosphorylation);GO:0006468(protein phosphorylation);GO:0005524(ATP binding);GO:0004702(signal transducer, downstream of receptor, with serine/threonine kinase activity);GO:0004672(protein kinase activity)	04010(MAPK signaling pathway);04540(Gap junction);04921(Oxytocin signaling pathway);04722(Neurotrophin signaling pathway)	NA	NA	NA	MSTRG.30209.1	MSTRG.30209	.	yes	novel	trans	NA	-43.69	-0.955403
ENSSSCT00000036194	0	chr1	183329729	183510087	MSTRG.1865	ENSSSCG00000025135	yes	GO:0005737(cytoplasm);GO:0023014(signal transduction by protein phosphorylation);GO:0006468(protein phosphorylation);GO:0005524(ATP binding);GO:0004702(signal transducer, downstream of receptor, with serine/threonine kinase activity);GO:0004672(protein kinase activity)	04010(MAPK signaling pathway);04540(Gap junction);04921(Oxytocin signaling pathway);04722(Neurotrophin signaling pathway)	NA	NA	NA	MSTRG.30360.1	MSTRG.30360	.	yes	novel	trans	NA	-41.85	-0.971363
ENSSSCT00000036194	0	chr1	183329729	183510087	MSTRG.1865	ENSSSCG00000025135	yes	GO:0005737(cytoplasm);GO:0023014(signal transduction by protein phosphorylation);GO:0006468(protein phosphorylation);GO:0005524(ATP binding);GO:0004702(signal transducer, downstream of receptor, with serine/threonine kinase activity);GO:0004672(protein kinase activity)	04010(MAPK signaling pathway);04540(Gap junction);04921(Oxytocin signaling pathway);04722(Neurotrophin signaling pathway)	NA	NA	NA	MSTRG.30732.1	MSTRG.30732	.	yes	novel	trans	NA	-22.56	-0.980441
ENSSSCT00000036194	0	chr1	183329729	183510087	MSTRG.1865	ENSSSCG00000025135	yes	GO:0005737(cytoplasm);GO:0023014(signal transduction by protein phosphorylation);GO:0006468(protein phosphorylation);GO:0005524(ATP binding);GO:0004702(signal transducer, downstream of receptor, with serine/threonine kinase activity);GO:0004672(protein kinase activity)	04010(MAPK signaling pathway);04540(Gap junction);04921(Oxytocin signaling pathway);04722(Neurotrophin signaling pathway)	NA	NA	NA	MSTRG.31992.1	MSTRG.31992	.	yes	novel	trans	NA	-37.07	-0.991074
ENSSSCT00000027967	0	chr1	204424044	204425633	MSTRG.2056	ENSSSCG00000021451	yes	GO:0008270(zinc ion binding)	NA	NA	NA	NA	MSTRG.4592.1	MSTRG.4592	.	yes	novel	trans	NA	-38.67	0.971039
ENSSSCT00000027967	0	chr1	204424044	204425633	MSTRG.2056	ENSSSCG00000021451	yes	GO:0008270(zinc ion binding)	NA	NA	NA	NA	MSTRG.4625.3	MSTRG.4625	.	yes	novel	trans	NA	-33.91	0.983692
ENSSSCT00000027967	0	chr1	204424044	204425633	MSTRG.2056	ENSSSCG00000021451	yes	GO:0008270(zinc ion binding)	NA	NA	NA	NA	MSTRG.5643.1	MSTRG.5643	MYL4	yes	novel	trans	NA	-28.59	-0.970218
ENSSSCT00000027967	0	chr1	204424044	204425633	MSTRG.2056	ENSSSCG00000021451	yes	GO:0008270(zinc ion binding)	NA	NA	NA	NA	MSTRG.5813.1	MSTRG.5813	.	yes	novel	trans	NA	-34.84	-0.959955
ENSSSCT00000027967	0	chr1	204424044	204425633	MSTRG.2056	ENSSSCG00000021451	yes	GO:0008270(zinc ion binding)	NA	NA	NA	NA	MSTRG.6500.1	MSTRG.6500	.	yes	novel	trans	NA	-36.37	0.978047
ENSSSCT00000027967	0	chr1	204424044	204425633	MSTRG.2056	ENSSSCG00000021451	yes	GO:0008270(zinc ion binding)	NA	NA	NA	NA	MSTRG.7277.1	MSTRG.7277	.	yes	novel	trans	NA	-23.11	-0.978995
ENSSSCT00000027967	0	chr1	204424044	204425633	MSTRG.2056	ENSSSCG00000021451	yes	GO:0008270(zinc ion binding)	NA	NA	NA	NA	MSTRG.7456.1	MSTRG.7456	IL17RB	yes	novel	trans	NA	-35.85	-0.972804
ENSSSCT00000027967	0	chr1	204424044	204425633	MSTRG.2056	ENSSSCG00000021451	yes	GO:0008270(zinc ion binding)	NA	NA	NA	NA	MSTRG.8811.1	MSTRG.8811	.	yes	novel	trans	NA	-34.69	0.956575
ENSSSCT00000027967	0	chr1	204424044	204425633	MSTRG.2056	ENSSSCG00000021451	yes	GO:0008270(zinc ion binding)	NA	NA	NA	NA	MSTRG.11081.1	MSTRG.11081	.	yes	novel	trans	NA	-36.77	-0.982226
ENSSSCT00000027967	0	chr1	204424044	204425633	MSTRG.2056	ENSSSCG00000021451	yes	GO:0008270(zinc ion binding)	NA	NA	NA	NA	MSTRG.12511.1	MSTRG.12511	.	yes	novel	trans	NA	-36.80	0.9775
ENSSSCT00000027967	0	chr1	204424044	204425633	MSTRG.2056	ENSSSCG00000021451	yes	GO:0008270(zinc ion binding)	NA	NA	NA	NA	MSTRG.13663.1	MSTRG.13663	.	yes	novel	trans	NA	-18.56	0.958641
ENSSSCT00000027967	0	chr1	204424044	204425633	MSTRG.2056	ENSSSCG00000021451	yes	GO:0008270(zinc ion binding)	NA	NA	NA	NA	MSTRG.13921.1	MSTRG.13921	.	yes	novel	trans	NA	-35.27	0.957566
ENSSSCT00000027967	0	chr1	204424044	204425633	MSTRG.2056	ENSSSCG00000021451	yes	GO:0008270(zinc ion binding)	NA	NA	NA	NA	MSTRG.14046.1	MSTRG.14046	.	yes	novel	trans	NA	-33.10	0.956128
ENSSSCT00000027967	0	chr1	204424044	204425633	MSTRG.2056	ENSSSCG00000021451	yes	GO:0008270(zinc ion binding)	NA	NA	NA	NA	MSTRG.14254.1	MSTRG.14254	.	yes	novel	trans	NA	-30.15	0.966048
ENSSSCT00000027967	0	chr1	204424044	204425633	MSTRG.2056	ENSSSCG00000021451	yes	GO:0008270(zinc ion binding)	NA	NA	NA	NA	MSTRG.15022.1	MSTRG.15022	CEP250	yes	novel	trans	NA	-33.03	-0.970262
ENSSSCT00000027967	0	chr1	204424044	204425633	MSTRG.2056	ENSSSCG00000021451	yes	GO:0008270(zinc ion binding)	NA	NA	NA	NA	MSTRG.16057.1	MSTRG.16057	.	yes	novel	trans	NA	-33.71	-0.97135
ENSSSCT00000027967	0	chr1	204424044	204425633	MSTRG.2056	ENSSSCG00000021451	yes	GO:0008270(zinc ion binding)	NA	NA	NA	NA	MSTRG.16431.1	MSTRG.16431	.	yes	novel	trans	NA	-35.30	-0.983083
ENSSSCT00000027967	0	chr1	204424044	204425633	MSTRG.2056	ENSSSCG00000021451	yes	GO:0008270(zinc ion binding)	NA	NA	NA	NA	MSTRG.16579.1	MSTRG.16579	.	yes	novel	trans	NA	-43.19	0.971926
ENSSSCT00000027967	0	chr1	204424044	204425633	MSTRG.2056	ENSSSCG00000021451	yes	GO:0008270(zinc ion binding)	NA	NA	NA	NA	MSTRG.16579.2	MSTRG.16579	.	yes	novel	trans	NA	-42.91	0.98567
ENSSSCT00000027967	0	chr1	204424044	204425633	MSTRG.2056	ENSSSCG00000021451	yes	GO:0008270(zinc ion binding)	NA	NA	NA	NA	MSTRG.17206.1	MSTRG.17206	.	yes	novel	trans	NA	-34.34	-0.96936
ENSSSCT00000027967	0	chr1	204424044	204425633	MSTRG.2056	ENSSSCG00000021451	yes	GO:0008270(zinc ion binding)	NA	NA	NA	NA	MSTRG.18731.1	MSTRG.18731	ENSSSCG00000014368	yes	novel	trans	NA	-24.84	0.965814
ENSSSCT00000027967	0	chr1	204424044	204425633	MSTRG.2056	ENSSSCG00000021451	yes	GO:0008270(zinc ion binding)	NA	NA	NA	NA	MSTRG.19520.1	MSTRG.19520	.	yes	novel	trans	NA	-30.02	0.989786
ENSSSCT00000027967	0	chr1	204424044	204425633	MSTRG.2056	ENSSSCG00000021451	yes	GO:0008270(zinc ion binding)	NA	NA	NA	NA	MSTRG.19547.1	MSTRG.19547	.	yes	novel	trans	NA	-21.36	0.958923
ENSSSCT00000027967	0	chr1	204424044	204425633	MSTRG.2056	ENSSSCG00000021451	yes	GO:0008270(zinc ion binding)	NA	NA	NA	NA	MSTRG.19762.1	MSTRG.19762	.	yes	novel	trans	NA	-38.32	0.960489
ENSSSCT00000027967	0	chr1	204424044	204425633	MSTRG.2056	ENSSSCG00000021451	yes	GO:0008270(zinc ion binding)	NA	NA	NA	NA	MSTRG.19799.1	MSTRG.19799	.	yes	novel	trans	NA	-18.53	0.962222
ENSSSCT00000027967	0	chr1	204424044	204425633	MSTRG.2056	ENSSSCG00000021451	yes	GO:0008270(zinc ion binding)	NA	NA	NA	NA	MSTRG.20540.1	MSTRG.20540	.	yes	novel	trans	NA	-14.06	-0.95739
ENSSSCT00000027967	0	chr1	204424044	204425633	MSTRG.2056	ENSSSCG00000021451	yes	GO:0008270(zinc ion binding)	NA	NA	NA	NA	MSTRG.21494.1	MSTRG.21494	.	yes	novel	trans	NA	-37.25	-0.962791
ENSSSCT00000027967	0	chr1	204424044	204425633	MSTRG.2056	ENSSSCG00000021451	yes	GO:0008270(zinc ion binding)	NA	NA	NA	NA	MSTRG.21860.1	MSTRG.21860	.	yes	novel	trans	NA	-15.71	0.99307
ENSSSCT00000027967	0	chr1	204424044	204425633	MSTRG.2056	ENSSSCG00000021451	yes	GO:0008270(zinc ion binding)	NA	NA	NA	NA	MSTRG.22198.1	MSTRG.22198	.	yes	novel	trans	NA	-20.16	0.960609
ENSSSCT00000027967	0	chr1	204424044	204425633	MSTRG.2056	ENSSSCG00000021451	yes	GO:0008270(zinc ion binding)	NA	NA	NA	NA	MSTRG.22576.1	MSTRG.22576	.	yes	novel	trans	NA	-22.01	0.957684
ENSSSCT00000027967	0	chr1	204424044	204425633	MSTRG.2056	ENSSSCG00000021451	yes	GO:0008270(zinc ion binding)	NA	NA	NA	NA	MSTRG.22782.1	MSTRG.22782	.	yes	novel	trans	NA	-28.32	0.989413
ENSSSCT00000027967	0	chr1	204424044	204425633	MSTRG.2056	ENSSSCG00000021451	yes	GO:0008270(zinc ion binding)	NA	NA	NA	NA	MSTRG.23105.1	MSTRG.23105	.	yes	novel	trans	NA	-32.61	0.984254
ENSSSCT00000027967	0	chr1	204424044	204425633	MSTRG.2056	ENSSSCG00000021451	yes	GO:0008270(zinc ion binding)	NA	NA	NA	NA	MSTRG.23310.1	MSTRG.23310	.	yes	novel	trans	NA	-21.71	-0.96467
ENSSSCT00000027967	0	chr1	204424044	204425633	MSTRG.2056	ENSSSCG00000021451	yes	GO:0008270(zinc ion binding)	NA	NA	NA	NA	MSTRG.23881.1	MSTRG.23881	.	yes	novel	trans	NA	-22.90	0.97871
ENSSSCT00000027967	0	chr1	204424044	204425633	MSTRG.2056	ENSSSCG00000021451	yes	GO:0008270(zinc ion binding)	NA	NA	NA	NA	MSTRG.24277.1	MSTRG.24277	.	yes	novel	trans	NA	-35.09	0.968297
ENSSSCT00000027967	0	chr1	204424044	204425633	MSTRG.2056	ENSSSCG00000021451	yes	GO:0008270(zinc ion binding)	NA	NA	NA	NA	MSTRG.24330.1	MSTRG.24330	.	yes	novel	trans	NA	-24.44	0.9814
ENSSSCT00000027967	0	chr1	204424044	204425633	MSTRG.2056	ENSSSCG00000021451	yes	GO:0008270(zinc ion binding)	NA	NA	NA	NA	MSTRG.24605.1	MSTRG.24605	.	yes	novel	trans	NA	-16.16	0.967831
ENSSSCT00000027967	0	chr1	204424044	204425633	MSTRG.2056	ENSSSCG00000021451	yes	GO:0008270(zinc ion binding)	NA	NA	NA	NA	MSTRG.24654.1	MSTRG.24654	.	yes	novel	trans	NA	-29.20	0.967768
ENSSSCT00000027967	0	chr1	204424044	204425633	MSTRG.2056	ENSSSCG00000021451	yes	GO:0008270(zinc ion binding)	NA	NA	NA	NA	MSTRG.24723.1	MSTRG.24723	.	yes	novel	trans	NA	-21.16	0.971575
ENSSSCT00000027967	0	chr1	204424044	204425633	MSTRG.2056	ENSSSCG00000021451	yes	GO:0008270(zinc ion binding)	NA	NA	NA	NA	MSTRG.24799.1	MSTRG.24799	.	yes	novel	trans	NA	-19.55	0.964074
ENSSSCT00000027967	0	chr1	204424044	204425633	MSTRG.2056	ENSSSCG00000021451	yes	GO:0008270(zinc ion binding)	NA	NA	NA	NA	MSTRG.24850.1	MSTRG.24850	.	yes	novel	trans	NA	-32.17	0.957153
ENSSSCT00000027967	0	chr1	204424044	204425633	MSTRG.2056	ENSSSCG00000021451	yes	GO:0008270(zinc ion binding)	NA	NA	NA	NA	MSTRG.25058.1	MSTRG.25058	.	yes	novel	trans	NA	-38.52	0.9903
ENSSSCT00000027967	0	chr1	204424044	204425633	MSTRG.2056	ENSSSCG00000021451	yes	GO:0008270(zinc ion binding)	NA	NA	NA	NA	MSTRG.26049.1	MSTRG.26049	.	yes	novel	trans	NA	-17.11	-0.953911
ENSSSCT00000027967	0	chr1	204424044	204425633	MSTRG.2056	ENSSSCG00000021451	yes	GO:0008270(zinc ion binding)	NA	NA	NA	NA	MSTRG.26559.1	MSTRG.26559	.	yes	novel	trans	NA	-45.23	0.966224
ENSSSCT00000027967	0	chr1	204424044	204425633	MSTRG.2056	ENSSSCG00000021451	yes	GO:0008270(zinc ion binding)	NA	NA	NA	NA	MSTRG.27332.1	MSTRG.27332	.	yes	novel	trans	NA	-29.98	0.962926
ENSSSCT00000027967	0	chr1	204424044	204425633	MSTRG.2056	ENSSSCG00000021451	yes	GO:0008270(zinc ion binding)	NA	NA	NA	NA	MSTRG.27711.1	MSTRG.27711	.	yes	novel	trans	NA	-11.86	-0.960976
ENSSSCT00000027967	0	chr1	204424044	204425633	MSTRG.2056	ENSSSCG00000021451	yes	GO:0008270(zinc ion binding)	NA	NA	NA	NA	MSTRG.28025.1	MSTRG.28025	.	yes	novel	trans	NA	-25.74	0.97866
ENSSSCT00000027967	0	chr1	204424044	204425633	MSTRG.2056	ENSSSCG00000021451	yes	GO:0008270(zinc ion binding)	NA	NA	NA	NA	MSTRG.28708.1	MSTRG.28708	.	yes	novel	trans	NA	-21.51	0.977279
ENSSSCT00000027967	0	chr1	204424044	204425633	MSTRG.2056	ENSSSCG00000021451	yes	GO:0008270(zinc ion binding)	NA	NA	NA	NA	MSTRG.30360.1	MSTRG.30360	.	yes	novel	trans	NA	-26.60	0.996296
ENSSSCT00000027967	0	chr1	204424044	204425633	MSTRG.2056	ENSSSCG00000021451	yes	GO:0008270(zinc ion binding)	NA	NA	NA	NA	MSTRG.30732.1	MSTRG.30732	.	yes	novel	trans	NA	-24.24	0.96555
ENSSSCT00000027967	0	chr1	204424044	204425633	MSTRG.2056	ENSSSCG00000021451	yes	GO:0008270(zinc ion binding)	NA	NA	NA	NA	MSTRG.31992.1	MSTRG.31992	.	yes	novel	trans	NA	-18.01	0.979573
ENSSSCT00000005603	0	chr1	210274464	210293196	MSTRG.2146	DHRS7	yes	GO:0016020(membrane);GO:0055114(oxidation-reduction process);GO:0016491(oxidoreductase activity)	NA	NA	NA	dehydrogenase/reductase (SDR family) member 7 [Source:HGNC Symbol;Acc:HGNC:21524]	MSTRG.4592.1	MSTRG.4592	.	yes	novel	trans	NA	-41.98	0.963084
ENSSSCT00000005603	0	chr1	210274464	210293196	MSTRG.2146	DHRS7	yes	GO:0016020(membrane);GO:0055114(oxidation-reduction process);GO:0016491(oxidoreductase activity)	NA	NA	NA	dehydrogenase/reductase (SDR family) member 7 [Source:HGNC Symbol;Acc:HGNC:21524]	MSTRG.5886.1	MSTRG.5886	.	yes	novel	trans	NA	-69.54	0.957699
ENSSSCT00000005603	0	chr1	210274464	210293196	MSTRG.2146	DHRS7	yes	GO:0016020(membrane);GO:0055114(oxidation-reduction process);GO:0016491(oxidoreductase activity)	NA	NA	NA	dehydrogenase/reductase (SDR family) member 7 [Source:HGNC Symbol;Acc:HGNC:21524]	MSTRG.5901.1	MSTRG.5901	.	yes	novel	trans	NA	-60.92	0.976216
ENSSSCT00000005603	0	chr1	210274464	210293196	MSTRG.2146	DHRS7	yes	GO:0016020(membrane);GO:0055114(oxidation-reduction process);GO:0016491(oxidoreductase activity)	NA	NA	NA	dehydrogenase/reductase (SDR family) member 7 [Source:HGNC Symbol;Acc:HGNC:21524]	MSTRG.8436.1	MSTRG.8436	.	yes	novel	trans	NA	-55.41	0.995299
ENSSSCT00000005603	0	chr1	210274464	210293196	MSTRG.2146	DHRS7	yes	GO:0016020(membrane);GO:0055114(oxidation-reduction process);GO:0016491(oxidoreductase activity)	NA	NA	NA	dehydrogenase/reductase (SDR family) member 7 [Source:HGNC Symbol;Acc:HGNC:21524]	MSTRG.8811.1	MSTRG.8811	.	yes	novel	trans	NA	-54.53	0.955531
ENSSSCT00000005603	0	chr1	210274464	210293196	MSTRG.2146	DHRS7	yes	GO:0016020(membrane);GO:0055114(oxidation-reduction process);GO:0016491(oxidoreductase activity)	NA	NA	NA	dehydrogenase/reductase (SDR family) member 7 [Source:HGNC Symbol;Acc:HGNC:21524]	MSTRG.10446.1	MSTRG.10446	.	yes	novel	trans	NA	-72.49	0.970783
ENSSSCT00000005603	0	chr1	210274464	210293196	MSTRG.2146	DHRS7	yes	GO:0016020(membrane);GO:0055114(oxidation-reduction process);GO:0016491(oxidoreductase activity)	NA	NA	NA	dehydrogenase/reductase (SDR family) member 7 [Source:HGNC Symbol;Acc:HGNC:21524]	MSTRG.19762.1	MSTRG.19762	.	yes	novel	trans	NA	-47.91	0.975953
ENSSSCT00000005603	0	chr1	210274464	210293196	MSTRG.2146	DHRS7	yes	GO:0016020(membrane);GO:0055114(oxidation-reduction process);GO:0016491(oxidoreductase activity)	NA	NA	NA	dehydrogenase/reductase (SDR family) member 7 [Source:HGNC Symbol;Acc:HGNC:21524]	MSTRG.24765.1	MSTRG.24765	ACSS3	yes	novel	trans	NA	-39.47	0.969272
ENSSSCT00000005603	0	chr1	210274464	210293196	MSTRG.2146	DHRS7	yes	GO:0016020(membrane);GO:0055114(oxidation-reduction process);GO:0016491(oxidoreductase activity)	NA	NA	NA	dehydrogenase/reductase (SDR family) member 7 [Source:HGNC Symbol;Acc:HGNC:21524]	MSTRG.26918.1	MSTRG.26918	.	yes	novel	trans	NA	-47.84	0.972746
ENSSSCT00000005603	0	chr1	210274464	210293196	MSTRG.2146	DHRS7	yes	GO:0016020(membrane);GO:0055114(oxidation-reduction process);GO:0016491(oxidoreductase activity)	NA	NA	NA	dehydrogenase/reductase (SDR family) member 7 [Source:HGNC Symbol;Acc:HGNC:21524]	MSTRG.27332.1	MSTRG.27332	.	yes	novel	trans	NA	-57.34	0.963396
ENSSSCT00000005603	0	chr1	210274464	210293196	MSTRG.2146	DHRS7	yes	GO:0016020(membrane);GO:0055114(oxidation-reduction process);GO:0016491(oxidoreductase activity)	NA	NA	NA	dehydrogenase/reductase (SDR family) member 7 [Source:HGNC Symbol;Acc:HGNC:21524]	MSTRG.28708.1	MSTRG.28708	.	yes	novel	trans	NA	-57.11	0.952776
ENSSSCT00000005603	0	chr1	210274464	210293196	MSTRG.2146	DHRS7	yes	GO:0016020(membrane);GO:0055114(oxidation-reduction process);GO:0016491(oxidoreductase activity)	NA	NA	NA	dehydrogenase/reductase (SDR family) member 7 [Source:HGNC Symbol;Acc:HGNC:21524]	MSTRG.28979.5	MSTRG.28979	SNORA79	yes	novel	trans	NA	-42.06	0.953015
ENSSSCT00000005703	0	chr1	227367650	227414111	MSTRG.2294	ENSSSCG00000005173	yes	GO:0070652(HAUS complex);GO:0051225(spindle assembly)	NA	NA	NA	NA	MSTRG.5076.1	MSTRG.5076	.	yes	novel	trans	NA	-26.51	0.975129
ENSSSCT00000005703	0	chr1	227367650	227414111	MSTRG.2294	ENSSSCG00000005173	yes	GO:0070652(HAUS complex);GO:0051225(spindle assembly)	NA	NA	NA	NA	MSTRG.8860.1	MSTRG.8860	LRCH3	yes	novel	trans	NA	-37.82	0.953717
ENSSSCT00000005703	0	chr1	227367650	227414111	MSTRG.2294	ENSSSCG00000005173	yes	GO:0070652(HAUS complex);GO:0051225(spindle assembly)	NA	NA	NA	NA	MSTRG.9166.1	MSTRG.9166	ENSSSCG00000011977	yes	novel	trans	NA	-46.41	0.969091
ENSSSCT00000005703	0	chr1	227367650	227414111	MSTRG.2294	ENSSSCG00000005173	yes	GO:0070652(HAUS complex);GO:0051225(spindle assembly)	NA	NA	NA	NA	MSTRG.12429.1	MSTRG.12429	ENSSSCG00000015878	yes	novel	trans	NA	-18.05	0.96279
ENSSSCT00000005703	0	chr1	227367650	227414111	MSTRG.2294	ENSSSCG00000005173	yes	GO:0070652(HAUS complex);GO:0051225(spindle assembly)	NA	NA	NA	NA	MSTRG.14497.1	MSTRG.14497	.	yes	novel	trans	NA	-25.91	0.959487
ENSSSCT00000005703	0	chr1	227367650	227414111	MSTRG.2294	ENSSSCG00000005173	yes	GO:0070652(HAUS complex);GO:0051225(spindle assembly)	NA	NA	NA	NA	MSTRG.15649.1	MSTRG.15649	.	yes	novel	trans	NA	-41.24	0.974848
ENSSSCT00000005703	0	chr1	227367650	227414111	MSTRG.2294	ENSSSCG00000005173	yes	GO:0070652(HAUS complex);GO:0051225(spindle assembly)	NA	NA	NA	NA	MSTRG.15971.1	MSTRG.15971	.	yes	novel	trans	NA	-40.23	0.969289
ENSSSCT00000005703	0	chr1	227367650	227414111	MSTRG.2294	ENSSSCG00000005173	yes	GO:0070652(HAUS complex);GO:0051225(spindle assembly)	NA	NA	NA	NA	MSTRG.17488.1	MSTRG.17488	ZNF791	yes	novel	trans	NA	-39.80	0.958682
ENSSSCT00000005703	0	chr1	227367650	227414111	MSTRG.2294	ENSSSCG00000005173	yes	GO:0070652(HAUS complex);GO:0051225(spindle assembly)	NA	NA	NA	NA	MSTRG.19072.1	MSTRG.19072	.	yes	novel	trans	NA	-39.71	-0.951726
ENSSSCT00000005703	0	chr1	227367650	227414111	MSTRG.2294	ENSSSCG00000005173	yes	GO:0070652(HAUS complex);GO:0051225(spindle assembly)	NA	NA	NA	NA	MSTRG.20655.1	MSTRG.20655	.	yes	novel	trans	NA	-33.28	0.974715
ENSSSCT00000005703	0	chr1	227367650	227414111	MSTRG.2294	ENSSSCG00000005173	yes	GO:0070652(HAUS complex);GO:0051225(spindle assembly)	NA	NA	NA	NA	MSTRG.25014.1	MSTRG.25014	ADAT1	yes	novel	trans	NA	-49.18	0.974508
ENSSSCT00000005703	0	chr1	227367650	227414111	MSTRG.2294	ENSSSCG00000005173	yes	GO:0070652(HAUS complex);GO:0051225(spindle assembly)	NA	NA	NA	NA	MSTRG.27290.1	MSTRG.27290	.	yes	novel	trans	NA	-28.86	-0.950524
ENSSSCT00000005703	0	chr1	227367650	227414111	MSTRG.2294	ENSSSCG00000005173	yes	GO:0070652(HAUS complex);GO:0051225(spindle assembly)	NA	NA	NA	NA	MSTRG.32620.1	MSTRG.32620	.	yes	novel	trans	NA	-40.08	0.973045
ENSSSCT00000005763	0	chr1	245001214	245032893	MSTRG.2412	VLDLR	yes	GO:0043235(receptor complex);GO:0016021(integral component of membrane);GO:0016020(membrane);GO:0005615(extracellular space);GO:1900006(positive regulation of dendrite development);GO:0048813(dendrite morphogenesis);GO:0045860(positive regulation of protein kinase activity);GO:0038026(reelin-mediated signaling pathway);GO:0034447(very-low-density lipoprotein particle clearance);GO:0034436(glycopr…	NA	NA	NA	very low density lipoprotein receptor [Source:HGNC Symbol;Acc:HGNC:12698]	MSTRG.5870.1	MSTRG.5870	.	yes	novel	trans	NA	-46.06	0.995954
ENSSSCT00000005763	0	chr1	245001214	245032893	MSTRG.2412	VLDLR	yes	GO:0043235(receptor complex);GO:0016021(integral component of membrane);GO:0016020(membrane);GO:0005615(extracellular space);GO:1900006(positive regulation of dendrite development);GO:0048813(dendrite morphogenesis);GO:0045860(positive regulation of protein kinase activity);GO:0038026(reelin-mediated signaling pathway);GO:0034447(very-low-density lipoprotein particle clearance);GO:0034436(glycopr…	NA	NA	NA	very low density lipoprotein receptor [Source:HGNC Symbol;Acc:HGNC:12698]	MSTRG.8811.1	MSTRG.8811	.	yes	novel	trans	NA	-37.74	0.955884
ENSSSCT00000005763	0	chr1	245001214	245032893	MSTRG.2412	VLDLR	yes	GO:0043235(receptor complex);GO:0016021(integral component of membrane);GO:0016020(membrane);GO:0005615(extracellular space);GO:1900006(positive regulation of dendrite development);GO:0048813(dendrite morphogenesis);GO:0045860(positive regulation of protein kinase activity);GO:0038026(reelin-mediated signaling pathway);GO:0034447(very-low-density lipoprotein particle clearance);GO:0034436(glycopr…	NA	NA	NA	very low density lipoprotein receptor [Source:HGNC Symbol;Acc:HGNC:12698]	MSTRG.9920.1	MSTRG.9920	.	yes	novel	trans	NA	-57.67	0.99593
ENSSSCT00000005763	0	chr1	245001214	245032893	MSTRG.2412	VLDLR	yes	GO:0043235(receptor complex);GO:0016021(integral component of membrane);GO:0016020(membrane);GO:0005615(extracellular space);GO:1900006(positive regulation of dendrite development);GO:0048813(dendrite morphogenesis);GO:0045860(positive regulation of protein kinase activity);GO:0038026(reelin-mediated signaling pathway);GO:0034447(very-low-density lipoprotein particle clearance);GO:0034436(glycopr…	NA	NA	NA	very low density lipoprotein receptor [Source:HGNC Symbol;Acc:HGNC:12698]	MSTRG.11550.1	MSTRG.11550	.	yes	novel	trans	NA	-25.91	0.976654
ENSSSCT00000005763	0	chr1	245001214	245032893	MSTRG.2412	VLDLR	yes	GO:0043235(receptor complex);GO:0016021(integral component of membrane);GO:0016020(membrane);GO:0005615(extracellular space);GO:1900006(positive regulation of dendrite development);GO:0048813(dendrite morphogenesis);GO:0045860(positive regulation of protein kinase activity);GO:0038026(reelin-mediated signaling pathway);GO:0034447(very-low-density lipoprotein particle clearance);GO:0034436(glycopr…	NA	NA	NA	very low density lipoprotein receptor [Source:HGNC Symbol;Acc:HGNC:12698]	MSTRG.12943.1	MSTRG.12943	.	yes	novel	trans	NA	-44.75	0.990232
ENSSSCT00000005763	0	chr1	245001214	245032893	MSTRG.2412	VLDLR	yes	GO:0043235(receptor complex);GO:0016021(integral component of membrane);GO:0016020(membrane);GO:0005615(extracellular space);GO:1900006(positive regulation of dendrite development);GO:0048813(dendrite morphogenesis);GO:0045860(positive regulation of protein kinase activity);GO:0038026(reelin-mediated signaling pathway);GO:0034447(very-low-density lipoprotein particle clearance);GO:0034436(glycopr…	NA	NA	NA	very low density lipoprotein receptor [Source:HGNC Symbol;Acc:HGNC:12698]	MSTRG.16577.1	MSTRG.16577	.	yes	novel	trans	NA	-47.20	0.979125
ENSSSCT00000005763	0	chr1	245001214	245032893	MSTRG.2412	VLDLR	yes	GO:0043235(receptor complex);GO:0016021(integral component of membrane);GO:0016020(membrane);GO:0005615(extracellular space);GO:1900006(positive regulation of dendrite development);GO:0048813(dendrite morphogenesis);GO:0045860(positive regulation of protein kinase activity);GO:0038026(reelin-mediated signaling pathway);GO:0034447(very-low-density lipoprotein particle clearance);GO:0034436(glycopr…	NA	NA	NA	very low density lipoprotein receptor [Source:HGNC Symbol;Acc:HGNC:12698]	MSTRG.16579.1	MSTRG.16579	.	yes	novel	trans	NA	-17.96	0.983557
ENSSSCT00000005763	0	chr1	245001214	245032893	MSTRG.2412	VLDLR	yes	GO:0043235(receptor complex);GO:0016021(integral component of membrane);GO:0016020(membrane);GO:0005615(extracellular space);GO:1900006(positive regulation of dendrite development);GO:0048813(dendrite morphogenesis);GO:0045860(positive regulation of protein kinase activity);GO:0038026(reelin-mediated signaling pathway);GO:0034447(very-low-density lipoprotein particle clearance);GO:0034436(glycopr…	NA	NA	NA	very low density lipoprotein receptor [Source:HGNC Symbol;Acc:HGNC:12698]	MSTRG.16579.2	MSTRG.16579	.	yes	novel	trans	NA	-21.33	0.975651
ENSSSCT00000005763	0	chr1	245001214	245032893	MSTRG.2412	VLDLR	yes	GO:0043235(receptor complex);GO:0016021(integral component of membrane);GO:0016020(membrane);GO:0005615(extracellular space);GO:1900006(positive regulation of dendrite development);GO:0048813(dendrite morphogenesis);GO:0045860(positive regulation of protein kinase activity);GO:0038026(reelin-mediated signaling pathway);GO:0034447(very-low-density lipoprotein particle clearance);GO:0034436(glycopr…	NA	NA	NA	very low density lipoprotein receptor [Source:HGNC Symbol;Acc:HGNC:12698]	MSTRG.19799.1	MSTRG.19799	.	yes	novel	trans	NA	-18.03	0.950815
ENSSSCT00000005763	0	chr1	245001214	245032893	MSTRG.2412	VLDLR	yes	GO:0043235(receptor complex);GO:0016021(integral component of membrane);GO:0016020(membrane);GO:0005615(extracellular space);GO:1900006(positive regulation of dendrite development);GO:0048813(dendrite morphogenesis);GO:0045860(positive regulation of protein kinase activity);GO:0038026(reelin-mediated signaling pathway);GO:0034447(very-low-density lipoprotein particle clearance);GO:0034436(glycopr…	NA	NA	NA	very low density lipoprotein receptor [Source:HGNC Symbol;Acc:HGNC:12698]	MSTRG.20222.1	MSTRG.20222	.	yes	novel	trans	NA	-38.19	0.97768
ENSSSCT00000005763	0	chr1	245001214	245032893	MSTRG.2412	VLDLR	yes	GO:0043235(receptor complex);GO:0016021(integral component of membrane);GO:0016020(membrane);GO:0005615(extracellular space);GO:1900006(positive regulation of dendrite development);GO:0048813(dendrite morphogenesis);GO:0045860(positive regulation of protein kinase activity);GO:0038026(reelin-mediated signaling pathway);GO:0034447(very-low-density lipoprotein particle clearance);GO:0034436(glycopr…	NA	NA	NA	very low density lipoprotein receptor [Source:HGNC Symbol;Acc:HGNC:12698]	MSTRG.23105.1	MSTRG.23105	.	yes	novel	trans	NA	-32.21	0.953908
ENSSSCT00000005763	0	chr1	245001214	245032893	MSTRG.2412	VLDLR	yes	GO:0043235(receptor complex);GO:0016021(integral component of membrane);GO:0016020(membrane);GO:0005615(extracellular space);GO:1900006(positive regulation of dendrite development);GO:0048813(dendrite morphogenesis);GO:0045860(positive regulation of protein kinase activity);GO:0038026(reelin-mediated signaling pathway);GO:0034447(very-low-density lipoprotein particle clearance);GO:0034436(glycopr…	NA	NA	NA	very low density lipoprotein receptor [Source:HGNC Symbol;Acc:HGNC:12698]	MSTRG.24330.1	MSTRG.24330	.	yes	novel	trans	NA	-33.41	0.978826
ENSSSCT00000005763	0	chr1	245001214	245032893	MSTRG.2412	VLDLR	yes	GO:0043235(receptor complex);GO:0016021(integral component of membrane);GO:0016020(membrane);GO:0005615(extracellular space);GO:1900006(positive regulation of dendrite development);GO:0048813(dendrite morphogenesis);GO:0045860(positive regulation of protein kinase activity);GO:0038026(reelin-mediated signaling pathway);GO:0034447(very-low-density lipoprotein particle clearance);GO:0034436(glycopr…	NA	NA	NA	very low density lipoprotein receptor [Source:HGNC Symbol;Acc:HGNC:12698]	MSTRG.24654.1	MSTRG.24654	.	yes	novel	trans	NA	-45.56	0.951562
ENSSSCT00000005763	0	chr1	245001214	245032893	MSTRG.2412	VLDLR	yes	GO:0043235(receptor complex);GO:0016021(integral component of membrane);GO:0016020(membrane);GO:0005615(extracellular space);GO:1900006(positive regulation of dendrite development);GO:0048813(dendrite morphogenesis);GO:0045860(positive regulation of protein kinase activity);GO:0038026(reelin-mediated signaling pathway);GO:0034447(very-low-density lipoprotein particle clearance);GO:0034436(glycopr…	NA	NA	NA	very low density lipoprotein receptor [Source:HGNC Symbol;Acc:HGNC:12698]	MSTRG.25058.1	MSTRG.25058	.	yes	novel	trans	NA	-44.36	0.966404
ENSSSCT00000005763	0	chr1	245001214	245032893	MSTRG.2412	VLDLR	yes	GO:0043235(receptor complex);GO:0016021(integral component of membrane);GO:0016020(membrane);GO:0005615(extracellular space);GO:1900006(positive regulation of dendrite development);GO:0048813(dendrite morphogenesis);GO:0045860(positive regulation of protein kinase activity);GO:0038026(reelin-mediated signaling pathway);GO:0034447(very-low-density lipoprotein particle clearance);GO:0034436(glycopr…	NA	NA	NA	very low density lipoprotein receptor [Source:HGNC Symbol;Acc:HGNC:12698]	MSTRG.25553.1	MSTRG.25553	.	yes	novel	trans	NA	-44.97	0.954651
ENSSSCT00000005763	0	chr1	245001214	245032893	MSTRG.2412	VLDLR	yes	GO:0043235(receptor complex);GO:0016021(integral component of membrane);GO:0016020(membrane);GO:0005615(extracellular space);GO:1900006(positive regulation of dendrite development);GO:0048813(dendrite morphogenesis);GO:0045860(positive regulation of protein kinase activity);GO:0038026(reelin-mediated signaling pathway);GO:0034447(very-low-density lipoprotein particle clearance);GO:0034436(glycopr…	NA	NA	NA	very low density lipoprotein receptor [Source:HGNC Symbol;Acc:HGNC:12698]	MSTRG.27099.1	MSTRG.27099	GIPC2	yes	novel	trans	NA	-47.26	0.969247
ENSSSCT00000005763	0	chr1	245001214	245032893	MSTRG.2412	VLDLR	yes	GO:0043235(receptor complex);GO:0016021(integral component of membrane);GO:0016020(membrane);GO:0005615(extracellular space);GO:1900006(positive regulation of dendrite development);GO:0048813(dendrite morphogenesis);GO:0045860(positive regulation of protein kinase activity);GO:0038026(reelin-mediated signaling pathway);GO:0034447(very-low-density lipoprotein particle clearance);GO:0034436(glycopr…	NA	NA	NA	very low density lipoprotein receptor [Source:HGNC Symbol;Acc:HGNC:12698]	MSTRG.28322.1	MSTRG.28322	ENSSSCG00000001692	yes	novel	trans	NA	-42.37	0.991454
ENSSSCT00000029937	0	chr1	268964060	268973843	MSTRG.2611	ENSSSCG00000029421	yes	NA	NA	NA	NA	NA	MSTRG.4592.1	MSTRG.4592	.	yes	novel	trans	NA	-34.80	0.968942
ENSSSCT00000029937	0	chr1	268964060	268973843	MSTRG.2611	ENSSSCG00000029421	yes	NA	NA	NA	NA	NA	MSTRG.4625.3	MSTRG.4625	.	yes	novel	trans	NA	-40.44	0.959972
ENSSSCT00000029937	0	chr1	268964060	268973843	MSTRG.2611	ENSSSCG00000029421	yes	NA	NA	NA	NA	NA	MSTRG.5886.1	MSTRG.5886	.	yes	novel	trans	NA	-38.61	0.995226
ENSSSCT00000029937	0	chr1	268964060	268973843	MSTRG.2611	ENSSSCG00000029421	yes	NA	NA	NA	NA	NA	MSTRG.5901.1	MSTRG.5901	.	yes	novel	trans	NA	-33.90	0.977051
ENSSSCT00000029937	0	chr1	268964060	268973843	MSTRG.2611	ENSSSCG00000029421	yes	NA	NA	NA	NA	NA	MSTRG.6301.1	MSTRG.6301	.	yes	novel	trans	NA	-45.27	0.950362
ENSSSCT00000029937	0	chr1	268964060	268973843	MSTRG.2611	ENSSSCG00000029421	yes	NA	NA	NA	NA	NA	MSTRG.8436.1	MSTRG.8436	.	yes	novel	trans	NA	-52.99	0.97976
ENSSSCT00000029937	0	chr1	268964060	268973843	MSTRG.2611	ENSSSCG00000029421	yes	NA	NA	NA	NA	NA	MSTRG.12579.1	MSTRG.12579	.	yes	novel	trans	NA	-42.77	0.97931
ENSSSCT00000029937	0	chr1	268964060	268973843	MSTRG.2611	ENSSSCG00000029421	yes	NA	NA	NA	NA	NA	MSTRG.13419.1	MSTRG.13419	.	yes	novel	trans	NA	-49.91	-0.95176
ENSSSCT00000029937	0	chr1	268964060	268973843	MSTRG.2611	ENSSSCG00000029421	yes	NA	NA	NA	NA	NA	MSTRG.14046.1	MSTRG.14046	.	yes	novel	trans	NA	-34.23	0.981227
ENSSSCT00000029937	0	chr1	268964060	268973843	MSTRG.2611	ENSSSCG00000029421	yes	NA	NA	NA	NA	NA	MSTRG.15022.1	MSTRG.15022	CEP250	yes	novel	trans	NA	-37.38	-0.953052
ENSSSCT00000029937	0	chr1	268964060	268973843	MSTRG.2611	ENSSSCG00000029421	yes	NA	NA	NA	NA	NA	MSTRG.16956.1	MSTRG.16956	.	yes	novel	trans	NA	-32.08	0.97437
ENSSSCT00000029937	0	chr1	268964060	268973843	MSTRG.2611	ENSSSCG00000029421	yes	NA	NA	NA	NA	NA	MSTRG.19762.1	MSTRG.19762	.	yes	novel	trans	NA	-30.73	0.980018
ENSSSCT00000029937	0	chr1	268964060	268973843	MSTRG.2611	ENSSSCG00000029421	yes	NA	NA	NA	NA	NA	MSTRG.22657.1	MSTRG.22657	IGSF3	yes	novel	trans	NA	-35.47	0.968787
ENSSSCT00000029937	0	chr1	268964060	268973843	MSTRG.2611	ENSSSCG00000029421	yes	NA	NA	NA	NA	NA	MSTRG.24277.1	MSTRG.24277	.	yes	novel	trans	NA	-17.15	0.966299
ENSSSCT00000029937	0	chr1	268964060	268973843	MSTRG.2611	ENSSSCG00000029421	yes	NA	NA	NA	NA	NA	MSTRG.24765.1	MSTRG.24765	ACSS3	yes	novel	trans	NA	-48.79	0.998142
ENSSSCT00000029937	0	chr1	268964060	268973843	MSTRG.2611	ENSSSCG00000029421	yes	NA	NA	NA	NA	NA	MSTRG.26758.1	MSTRG.26758	ENSSSCG00000027352	yes	novel	trans	NA	-24.25	0.977116
ENSSSCT00000029937	0	chr1	268964060	268973843	MSTRG.2611	ENSSSCG00000029421	yes	NA	NA	NA	NA	NA	MSTRG.27332.1	MSTRG.27332	.	yes	novel	trans	NA	-52.14	0.98488
ENSSSCT00000029937	0	chr1	268964060	268973843	MSTRG.2611	ENSSSCG00000029421	yes	NA	NA	NA	NA	NA	MSTRG.27711.1	MSTRG.27711	.	yes	novel	trans	NA	-38.31	-0.952258
ENSSSCT00000029937	0	chr1	268964060	268973843	MSTRG.2611	ENSSSCG00000029421	yes	NA	NA	NA	NA	NA	MSTRG.28708.1	MSTRG.28708	.	yes	novel	trans	NA	-42.67	0.972514
ENSSSCT00000029937	0	chr1	268964060	268973843	MSTRG.2611	ENSSSCG00000029421	yes	NA	NA	NA	NA	NA	MSTRG.28979.5	MSTRG.28979	SNORA79	yes	novel	trans	NA	-21.46	0.997001
ENSSSCT00000029937	0	chr1	268964060	268973843	MSTRG.2611	ENSSSCG00000029421	yes	NA	NA	NA	NA	NA	MSTRG.28976.1	MSTRG.28976	.	yes	novel	trans	NA	-42.37	0.966736
ENSSSCT00000029937	0	chr1	268964060	268973843	MSTRG.2611	ENSSSCG00000029421	yes	NA	NA	NA	NA	NA	MSTRG.30173.1	MSTRG.30173	CXCL2	yes	novel	trans	NA	-50.04	0.982159
ENSSSCT00000029937	0	chr1	268964060	268973843	MSTRG.2611	ENSSSCG00000029421	yes	NA	NA	NA	NA	NA	MSTRG.31692.1	MSTRG.31692	.	yes	novel	trans	NA	-22.51	0.991225
ENSSSCT00000005921	0	chr1	269014797	269023294	MSTRG.2613	ENSSSCG00000005381	yes	GO:0031012(extracellular matrix);GO:0007155(cell adhesion);GO:0005198(structural molecule activity)	04974(Protein digestion and absorption)	NA	NA	NA	MSTRG.4592.1	MSTRG.4592	.	yes	novel	trans	NA	-32.49	0.964383
ENSSSCT00000005921	0	chr1	269014797	269023294	MSTRG.2613	ENSSSCG00000005381	yes	GO:0031012(extracellular matrix);GO:0007155(cell adhesion);GO:0005198(structural molecule activity)	04974(Protein digestion and absorption)	NA	NA	NA	MSTRG.4625.3	MSTRG.4625	.	yes	novel	trans	NA	-49.61	0.964508
ENSSSCT00000005921	0	chr1	269014797	269023294	MSTRG.2613	ENSSSCG00000005381	yes	GO:0031012(extracellular matrix);GO:0007155(cell adhesion);GO:0005198(structural molecule activity)	04974(Protein digestion and absorption)	NA	NA	NA	MSTRG.5886.1	MSTRG.5886	.	yes	novel	trans	NA	-35.76	0.956311
ENSSSCT00000005921	0	chr1	269014797	269023294	MSTRG.2613	ENSSSCG00000005381	yes	GO:0031012(extracellular matrix);GO:0007155(cell adhesion);GO:0005198(structural molecule activity)	04974(Protein digestion and absorption)	NA	NA	NA	MSTRG.6301.1	MSTRG.6301	.	yes	novel	trans	NA	-28.81	0.986727
ENSSSCT00000005921	0	chr1	269014797	269023294	MSTRG.2613	ENSSSCG00000005381	yes	GO:0031012(extracellular matrix);GO:0007155(cell adhesion);GO:0005198(structural molecule activity)	04974(Protein digestion and absorption)	NA	NA	NA	MSTRG.6500.1	MSTRG.6500	.	yes	novel	trans	NA	-21.79	0.96632
ENSSSCT00000005921	0	chr1	269014797	269023294	MSTRG.2613	ENSSSCG00000005381	yes	GO:0031012(extracellular matrix);GO:0007155(cell adhesion);GO:0005198(structural molecule activity)	04974(Protein digestion and absorption)	NA	NA	NA	MSTRG.7456.1	MSTRG.7456	IL17RB	yes	novel	trans	NA	-38.62	-0.951082
ENSSSCT00000005921	0	chr1	269014797	269023294	MSTRG.2613	ENSSSCG00000005381	yes	GO:0031012(extracellular matrix);GO:0007155(cell adhesion);GO:0005198(structural molecule activity)	04974(Protein digestion and absorption)	NA	NA	NA	MSTRG.8882.1	MSTRG.8882	.	yes	novel	trans	NA	-24.01	-0.966538
ENSSSCT00000005921	0	chr1	269014797	269023294	MSTRG.2613	ENSSSCG00000005381	yes	GO:0031012(extracellular matrix);GO:0007155(cell adhesion);GO:0005198(structural molecule activity)	04974(Protein digestion and absorption)	NA	NA	NA	MSTRG.10360.1	MSTRG.10360	.	yes	novel	trans	NA	-32.27	0.976745
ENSSSCT00000005921	0	chr1	269014797	269023294	MSTRG.2613	ENSSSCG00000005381	yes	GO:0031012(extracellular matrix);GO:0007155(cell adhesion);GO:0005198(structural molecule activity)	04974(Protein digestion and absorption)	NA	NA	NA	MSTRG.11036.1	MSTRG.11036	.	yes	novel	trans	NA	-32.46	0.965399
ENSSSCT00000005921	0	chr1	269014797	269023294	MSTRG.2613	ENSSSCG00000005381	yes	GO:0031012(extracellular matrix);GO:0007155(cell adhesion);GO:0005198(structural molecule activity)	04974(Protein digestion and absorption)	NA	NA	NA	MSTRG.11081.1	MSTRG.11081	.	yes	novel	trans	NA	-22.88	-0.967071
ENSSSCT00000005921	0	chr1	269014797	269023294	MSTRG.2613	ENSSSCG00000005381	yes	GO:0031012(extracellular matrix);GO:0007155(cell adhesion);GO:0005198(structural molecule activity)	04974(Protein digestion and absorption)	NA	NA	NA	MSTRG.13663.1	MSTRG.13663	.	yes	novel	trans	NA	-33.91	0.963144
ENSSSCT00000005921	0	chr1	269014797	269023294	MSTRG.2613	ENSSSCG00000005381	yes	GO:0031012(extracellular matrix);GO:0007155(cell adhesion);GO:0005198(structural molecule activity)	04974(Protein digestion and absorption)	NA	NA	NA	MSTRG.14046.1	MSTRG.14046	.	yes	novel	trans	NA	-11.46	0.97921
ENSSSCT00000005921	0	chr1	269014797	269023294	MSTRG.2613	ENSSSCG00000005381	yes	GO:0031012(extracellular matrix);GO:0007155(cell adhesion);GO:0005198(structural molecule activity)	04974(Protein digestion and absorption)	NA	NA	NA	MSTRG.15360.1	MSTRG.15360	.	yes	novel	trans	NA	-26.16	-0.967542
ENSSSCT00000005921	0	chr1	269014797	269023294	MSTRG.2613	ENSSSCG00000005381	yes	GO:0031012(extracellular matrix);GO:0007155(cell adhesion);GO:0005198(structural molecule activity)	04974(Protein digestion and absorption)	NA	NA	NA	MSTRG.16956.1	MSTRG.16956	.	yes	novel	trans	NA	-30.11	0.966082
ENSSSCT00000005921	0	chr1	269014797	269023294	MSTRG.2613	ENSSSCG00000005381	yes	GO:0031012(extracellular matrix);GO:0007155(cell adhesion);GO:0005198(structural molecule activity)	04974(Protein digestion and absorption)	NA	NA	NA	MSTRG.19762.1	MSTRG.19762	.	yes	novel	trans	NA	-43.54	0.960362
ENSSSCT00000005921	0	chr1	269014797	269023294	MSTRG.2613	ENSSSCG00000005381	yes	GO:0031012(extracellular matrix);GO:0007155(cell adhesion);GO:0005198(structural molecule activity)	04974(Protein digestion and absorption)	NA	NA	NA	MSTRG.20540.1	MSTRG.20540	.	yes	novel	trans	NA	-42.46	-0.961349
ENSSSCT00000005921	0	chr1	269014797	269023294	MSTRG.2613	ENSSSCG00000005381	yes	GO:0031012(extracellular matrix);GO:0007155(cell adhesion);GO:0005198(structural molecule activity)	04974(Protein digestion and absorption)	NA	NA	NA	MSTRG.21860.1	MSTRG.21860	.	yes	novel	trans	NA	-36.80	0.955207
ENSSSCT00000005921	0	chr1	269014797	269023294	MSTRG.2613	ENSSSCG00000005381	yes	GO:0031012(extracellular matrix);GO:0007155(cell adhesion);GO:0005198(structural molecule activity)	04974(Protein digestion and absorption)	NA	NA	NA	MSTRG.22503.1	MSTRG.22503	CIART	yes	novel	trans	NA	-48.02	0.961405
ENSSSCT00000005921	0	chr1	269014797	269023294	MSTRG.2613	ENSSSCG00000005381	yes	GO:0031012(extracellular matrix);GO:0007155(cell adhesion);GO:0005198(structural molecule activity)	04974(Protein digestion and absorption)	NA	NA	NA	MSTRG.22657.1	MSTRG.22657	IGSF3	yes	novel	trans	NA	-23.60	0.970264
ENSSSCT00000005921	0	chr1	269014797	269023294	MSTRG.2613	ENSSSCG00000005381	yes	GO:0031012(extracellular matrix);GO:0007155(cell adhesion);GO:0005198(structural molecule activity)	04974(Protein digestion and absorption)	NA	NA	NA	MSTRG.24277.1	MSTRG.24277	.	yes	novel	trans	NA	-42.52	0.98972
ENSSSCT00000005921	0	chr1	269014797	269023294	MSTRG.2613	ENSSSCG00000005381	yes	GO:0031012(extracellular matrix);GO:0007155(cell adhesion);GO:0005198(structural molecule activity)	04974(Protein digestion and absorption)	NA	NA	NA	MSTRG.24765.1	MSTRG.24765	ACSS3	yes	novel	trans	NA	-29.84	0.972241
ENSSSCT00000005921	0	chr1	269014797	269023294	MSTRG.2613	ENSSSCG00000005381	yes	GO:0031012(extracellular matrix);GO:0007155(cell adhesion);GO:0005198(structural molecule activity)	04974(Protein digestion and absorption)	NA	NA	NA	MSTRG.24799.1	MSTRG.24799	.	yes	novel	trans	NA	-33.05	0.958963
ENSSSCT00000005921	0	chr1	269014797	269023294	MSTRG.2613	ENSSSCG00000005381	yes	GO:0031012(extracellular matrix);GO:0007155(cell adhesion);GO:0005198(structural molecule activity)	04974(Protein digestion and absorption)	NA	NA	NA	MSTRG.26444.1	MSTRG.26444	.	yes	novel	trans	NA	-42.26	0.967822
ENSSSCT00000005921	0	chr1	269014797	269023294	MSTRG.2613	ENSSSCG00000005381	yes	GO:0031012(extracellular matrix);GO:0007155(cell adhesion);GO:0005198(structural molecule activity)	04974(Protein digestion and absorption)	NA	NA	NA	MSTRG.26758.1	MSTRG.26758	ENSSSCG00000027352	yes	novel	trans	NA	-38.80	0.991538
ENSSSCT00000005921	0	chr1	269014797	269023294	MSTRG.2613	ENSSSCG00000005381	yes	GO:0031012(extracellular matrix);GO:0007155(cell adhesion);GO:0005198(structural molecule activity)	04974(Protein digestion and absorption)	NA	NA	NA	MSTRG.27332.1	MSTRG.27332	.	yes	novel	trans	NA	-30.37	0.983487
ENSSSCT00000005921	0	chr1	269014797	269023294	MSTRG.2613	ENSSSCG00000005381	yes	GO:0031012(extracellular matrix);GO:0007155(cell adhesion);GO:0005198(structural molecule activity)	04974(Protein digestion and absorption)	NA	NA	NA	MSTRG.27711.1	MSTRG.27711	.	yes	novel	trans	NA	-24.26	-0.987307
ENSSSCT00000005921	0	chr1	269014797	269023294	MSTRG.2613	ENSSSCG00000005381	yes	GO:0031012(extracellular matrix);GO:0007155(cell adhesion);GO:0005198(structural molecule activity)	04974(Protein digestion and absorption)	NA	NA	NA	MSTRG.28025.1	MSTRG.28025	.	yes	novel	trans	NA	-33.87	0.969566
ENSSSCT00000005921	0	chr1	269014797	269023294	MSTRG.2613	ENSSSCG00000005381	yes	GO:0031012(extracellular matrix);GO:0007155(cell adhesion);GO:0005198(structural molecule activity)	04974(Protein digestion and absorption)	NA	NA	NA	MSTRG.28708.1	MSTRG.28708	.	yes	novel	trans	NA	-46.43	0.97738
ENSSSCT00000005921	0	chr1	269014797	269023294	MSTRG.2613	ENSSSCG00000005381	yes	GO:0031012(extracellular matrix);GO:0007155(cell adhesion);GO:0005198(structural molecule activity)	04974(Protein digestion and absorption)	NA	NA	NA	MSTRG.28979.5	MSTRG.28979	SNORA79	yes	novel	trans	NA	-45.22	0.976492
ENSSSCT00000005921	0	chr1	269014797	269023294	MSTRG.2613	ENSSSCG00000005381	yes	GO:0031012(extracellular matrix);GO:0007155(cell adhesion);GO:0005198(structural molecule activity)	04974(Protein digestion and absorption)	NA	NA	NA	MSTRG.28976.1	MSTRG.28976	.	yes	novel	trans	NA	-27.06	0.977765
ENSSSCT00000005921	0	chr1	269014797	269023294	MSTRG.2613	ENSSSCG00000005381	yes	GO:0031012(extracellular matrix);GO:0007155(cell adhesion);GO:0005198(structural molecule activity)	04974(Protein digestion and absorption)	NA	NA	NA	MSTRG.29455.1	MSTRG.29455	ENSSSCG00000002451	yes	novel	trans	NA	-26.03	0.961397
ENSSSCT00000005921	0	chr1	269014797	269023294	MSTRG.2613	ENSSSCG00000005381	yes	GO:0031012(extracellular matrix);GO:0007155(cell adhesion);GO:0005198(structural molecule activity)	04974(Protein digestion and absorption)	NA	NA	NA	MSTRG.30173.1	MSTRG.30173	CXCL2	yes	novel	trans	NA	-19.68	0.998654
ENSSSCT00000005921	0	chr1	269014797	269023294	MSTRG.2613	ENSSSCG00000005381	yes	GO:0031012(extracellular matrix);GO:0007155(cell adhesion);GO:0005198(structural molecule activity)	04974(Protein digestion and absorption)	NA	NA	NA	MSTRG.30209.1	MSTRG.30209	.	yes	novel	trans	NA	-31.20	0.955555
ENSSSCT00000005921	0	chr1	269014797	269023294	MSTRG.2613	ENSSSCG00000005381	yes	GO:0031012(extracellular matrix);GO:0007155(cell adhesion);GO:0005198(structural molecule activity)	04974(Protein digestion and absorption)	NA	NA	NA	MSTRG.30732.1	MSTRG.30732	.	yes	novel	trans	NA	-32.36	0.976703
ENSSSCT00000005921	0	chr1	269014797	269023294	MSTRG.2613	ENSSSCG00000005381	yes	GO:0031012(extracellular matrix);GO:0007155(cell adhesion);GO:0005198(structural molecule activity)	04974(Protein digestion and absorption)	NA	NA	NA	MSTRG.31692.1	MSTRG.31692	.	yes	novel	trans	NA	-23.66	0.981098
ENSSSCT00000005921	0	chr1	269014797	269023294	MSTRG.2613	ENSSSCG00000005381	yes	GO:0031012(extracellular matrix);GO:0007155(cell adhesion);GO:0005198(structural molecule activity)	04974(Protein digestion and absorption)	NA	NA	NA	MSTRG.31992.1	MSTRG.31992	.	yes	novel	trans	NA	-29.33	0.96623
ENSSSCT00000006045	0	chr1	287904367	288136642	MSTRG.2776	PAPPA	yes	GO:0005615(extracellular space);GO:0005576(extracellular region);GO:0006508(proteolysis);GO:0008237(metallopeptidase activity);GO:0004222(metalloendopeptidase activity);GO:0004175(endopeptidase activity)	NA	NA	NA	pappalysin 1 [Source:HGNC Symbol;Acc:HGNC:8602]	MSTRG.4592.1	MSTRG.4592	.	yes	novel	trans	NA	-40.46	0.970405
ENSSSCT00000006045	0	chr1	287904367	288136642	MSTRG.2776	PAPPA	yes	GO:0005615(extracellular space);GO:0005576(extracellular region);GO:0006508(proteolysis);GO:0008237(metallopeptidase activity);GO:0004222(metalloendopeptidase activity);GO:0004175(endopeptidase activity)	NA	NA	NA	pappalysin 1 [Source:HGNC Symbol;Acc:HGNC:8602]	MSTRG.4625.3	MSTRG.4625	.	yes	novel	trans	NA	-48.04	0.96605
ENSSSCT00000006045	0	chr1	287904367	288136642	MSTRG.2776	PAPPA	yes	GO:0005615(extracellular space);GO:0005576(extracellular region);GO:0006508(proteolysis);GO:0008237(metallopeptidase activity);GO:0004222(metalloendopeptidase activity);GO:0004175(endopeptidase activity)	NA	NA	NA	pappalysin 1 [Source:HGNC Symbol;Acc:HGNC:8602]	MSTRG.5886.1	MSTRG.5886	.	yes	novel	trans	NA	-34.44	0.971796
ENSSSCT00000006045	0	chr1	287904367	288136642	MSTRG.2776	PAPPA	yes	GO:0005615(extracellular space);GO:0005576(extracellular region);GO:0006508(proteolysis);GO:0008237(metallopeptidase activity);GO:0004222(metalloendopeptidase activity);GO:0004175(endopeptidase activity)	NA	NA	NA	pappalysin 1 [Source:HGNC Symbol;Acc:HGNC:8602]	MSTRG.6301.1	MSTRG.6301	.	yes	novel	trans	NA	-47.32	0.991671
ENSSSCT00000006045	0	chr1	287904367	288136642	MSTRG.2776	PAPPA	yes	GO:0005615(extracellular space);GO:0005576(extracellular region);GO:0006508(proteolysis);GO:0008237(metallopeptidase activity);GO:0004222(metalloendopeptidase activity);GO:0004175(endopeptidase activity)	NA	NA	NA	pappalysin 1 [Source:HGNC Symbol;Acc:HGNC:8602]	MSTRG.6500.1	MSTRG.6500	.	yes	novel	trans	NA	-45.04	0.95743
ENSSSCT00000006045	0	chr1	287904367	288136642	MSTRG.2776	PAPPA	yes	GO:0005615(extracellular space);GO:0005576(extracellular region);GO:0006508(proteolysis);GO:0008237(metallopeptidase activity);GO:0004222(metalloendopeptidase activity);GO:0004175(endopeptidase activity)	NA	NA	NA	pappalysin 1 [Source:HGNC Symbol;Acc:HGNC:8602]	MSTRG.7456.1	MSTRG.7456	IL17RB	yes	novel	trans	NA	-20.28	-0.976933
ENSSSCT00000006045	0	chr1	287904367	288136642	MSTRG.2776	PAPPA	yes	GO:0005615(extracellular space);GO:0005576(extracellular region);GO:0006508(proteolysis);GO:0008237(metallopeptidase activity);GO:0004222(metalloendopeptidase activity);GO:0004175(endopeptidase activity)	NA	NA	NA	pappalysin 1 [Source:HGNC Symbol;Acc:HGNC:8602]	MSTRG.10360.1	MSTRG.10360	.	yes	novel	trans	NA	-30.06	0.982058
ENSSSCT00000006045	0	chr1	287904367	288136642	MSTRG.2776	PAPPA	yes	GO:0005615(extracellular space);GO:0005576(extracellular region);GO:0006508(proteolysis);GO:0008237(metallopeptidase activity);GO:0004222(metalloendopeptidase activity);GO:0004175(endopeptidase activity)	NA	NA	NA	pappalysin 1 [Source:HGNC Symbol;Acc:HGNC:8602]	MSTRG.11036.1	MSTRG.11036	.	yes	novel	trans	NA	-35.26	0.971621
ENSSSCT00000006045	0	chr1	287904367	288136642	MSTRG.2776	PAPPA	yes	GO:0005615(extracellular space);GO:0005576(extracellular region);GO:0006508(proteolysis);GO:0008237(metallopeptidase activity);GO:0004222(metalloendopeptidase activity);GO:0004175(endopeptidase activity)	NA	NA	NA	pappalysin 1 [Source:HGNC Symbol;Acc:HGNC:8602]	MSTRG.11081.1	MSTRG.11081	.	yes	novel	trans	NA	-25.38	-0.973315
ENSSSCT00000006045	0	chr1	287904367	288136642	MSTRG.2776	PAPPA	yes	GO:0005615(extracellular space);GO:0005576(extracellular region);GO:0006508(proteolysis);GO:0008237(metallopeptidase activity);GO:0004222(metalloendopeptidase activity);GO:0004175(endopeptidase activity)	NA	NA	NA	pappalysin 1 [Source:HGNC Symbol;Acc:HGNC:8602]	MSTRG.12579.1	MSTRG.12579	.	yes	novel	trans	NA	-51.29	0.951617
ENSSSCT00000006045	0	chr1	287904367	288136642	MSTRG.2776	PAPPA	yes	GO:0005615(extracellular space);GO:0005576(extracellular region);GO:0006508(proteolysis);GO:0008237(metallopeptidase activity);GO:0004222(metalloendopeptidase activity);GO:0004175(endopeptidase activity)	NA	NA	NA	pappalysin 1 [Source:HGNC Symbol;Acc:HGNC:8602]	MSTRG.13419.1	MSTRG.13419	.	yes	novel	trans	NA	-27.35	-0.956021
ENSSSCT00000006045	0	chr1	287904367	288136642	MSTRG.2776	PAPPA	yes	GO:0005615(extracellular space);GO:0005576(extracellular region);GO:0006508(proteolysis);GO:0008237(metallopeptidase activity);GO:0004222(metalloendopeptidase activity);GO:0004175(endopeptidase activity)	NA	NA	NA	pappalysin 1 [Source:HGNC Symbol;Acc:HGNC:8602]	MSTRG.13663.1	MSTRG.13663	.	yes	novel	trans	NA	-51.33	0.951306
ENSSSCT00000006045	0	chr1	287904367	288136642	MSTRG.2776	PAPPA	yes	GO:0005615(extracellular space);GO:0005576(extracellular region);GO:0006508(proteolysis);GO:0008237(metallopeptidase activity);GO:0004222(metalloendopeptidase activity);GO:0004175(endopeptidase activity)	NA	NA	NA	pappalysin 1 [Source:HGNC Symbol;Acc:HGNC:8602]	MSTRG.13917.1	MSTRG.13917	.	yes	novel	trans	NA	-25.95	0.95008
ENSSSCT00000006045	0	chr1	287904367	288136642	MSTRG.2776	PAPPA	yes	GO:0005615(extracellular space);GO:0005576(extracellular region);GO:0006508(proteolysis);GO:0008237(metallopeptidase activity);GO:0004222(metalloendopeptidase activity);GO:0004175(endopeptidase activity)	NA	NA	NA	pappalysin 1 [Source:HGNC Symbol;Acc:HGNC:8602]	MSTRG.14046.1	MSTRG.14046	.	yes	novel	trans	NA	-45.23	0.99556
ENSSSCT00000006045	0	chr1	287904367	288136642	MSTRG.2776	PAPPA	yes	GO:0005615(extracellular space);GO:0005576(extracellular region);GO:0006508(proteolysis);GO:0008237(metallopeptidase activity);GO:0004222(metalloendopeptidase activity);GO:0004175(endopeptidase activity)	NA	NA	NA	pappalysin 1 [Source:HGNC Symbol;Acc:HGNC:8602]	MSTRG.14497.1	MSTRG.14497	.	yes	novel	trans	NA	-42.82	-0.962392
ENSSSCT00000006045	0	chr1	287904367	288136642	MSTRG.2776	PAPPA	yes	GO:0005615(extracellular space);GO:0005576(extracellular region);GO:0006508(proteolysis);GO:0008237(metallopeptidase activity);GO:0004222(metalloendopeptidase activity);GO:0004175(endopeptidase activity)	NA	NA	NA	pappalysin 1 [Source:HGNC Symbol;Acc:HGNC:8602]	MSTRG.15022.1	MSTRG.15022	CEP250	yes	novel	trans	NA	-35.50	-0.950274
ENSSSCT00000006045	0	chr1	287904367	288136642	MSTRG.2776	PAPPA	yes	GO:0005615(extracellular space);GO:0005576(extracellular region);GO:0006508(proteolysis);GO:0008237(metallopeptidase activity);GO:0004222(metalloendopeptidase activity);GO:0004175(endopeptidase activity)	NA	NA	NA	pappalysin 1 [Source:HGNC Symbol;Acc:HGNC:8602]	MSTRG.16956.1	MSTRG.16956	.	yes	novel	trans	NA	-42.72	0.983561
ENSSSCT00000006045	0	chr1	287904367	288136642	MSTRG.2776	PAPPA	yes	GO:0005615(extracellular space);GO:0005576(extracellular region);GO:0006508(proteolysis);GO:0008237(metallopeptidase activity);GO:0004222(metalloendopeptidase activity);GO:0004175(endopeptidase activity)	NA	NA	NA	pappalysin 1 [Source:HGNC Symbol;Acc:HGNC:8602]	MSTRG.17206.1	MSTRG.17206	.	yes	novel	trans	NA	-40.21	-0.971392
ENSSSCT00000006045	0	chr1	287904367	288136642	MSTRG.2776	PAPPA	yes	GO:0005615(extracellular space);GO:0005576(extracellular region);GO:0006508(proteolysis);GO:0008237(metallopeptidase activity);GO:0004222(metalloendopeptidase activity);GO:0004175(endopeptidase activity)	NA	NA	NA	pappalysin 1 [Source:HGNC Symbol;Acc:HGNC:8602]	MSTRG.19072.1	MSTRG.19072	.	yes	novel	trans	NA	-46.35	0.954296
ENSSSCT00000006045	0	chr1	287904367	288136642	MSTRG.2776	PAPPA	yes	GO:0005615(extracellular space);GO:0005576(extracellular region);GO:0006508(proteolysis);GO:0008237(metallopeptidase activity);GO:0004222(metalloendopeptidase activity);GO:0004175(endopeptidase activity)	NA	NA	NA	pappalysin 1 [Source:HGNC Symbol;Acc:HGNC:8602]	MSTRG.19762.1	MSTRG.19762	.	yes	novel	trans	NA	-50.23	0.966198
ENSSSCT00000006045	0	chr1	287904367	288136642	MSTRG.2776	PAPPA	yes	GO:0005615(extracellular space);GO:0005576(extracellular region);GO:0006508(proteolysis);GO:0008237(metallopeptidase activity);GO:0004222(metalloendopeptidase activity);GO:0004175(endopeptidase activity)	NA	NA	NA	pappalysin 1 [Source:HGNC Symbol;Acc:HGNC:8602]	MSTRG.20540.1	MSTRG.20540	.	yes	novel	trans	NA	-43.29	-0.962593
ENSSSCT00000006045	0	chr1	287904367	288136642	MSTRG.2776	PAPPA	yes	GO:0005615(extracellular space);GO:0005576(extracellular region);GO:0006508(proteolysis);GO:0008237(metallopeptidase activity);GO:0004222(metalloendopeptidase activity);GO:0004175(endopeptidase activity)	NA	NA	NA	pappalysin 1 [Source:HGNC Symbol;Acc:HGNC:8602]	MSTRG.21494.1	MSTRG.21494	.	yes	novel	trans	NA	-38.63	-0.962741
ENSSSCT00000006045	0	chr1	287904367	288136642	MSTRG.2776	PAPPA	yes	GO:0005615(extracellular space);GO:0005576(extracellular region);GO:0006508(proteolysis);GO:0008237(metallopeptidase activity);GO:0004222(metalloendopeptidase activity);GO:0004175(endopeptidase activity)	NA	NA	NA	pappalysin 1 [Source:HGNC Symbol;Acc:HGNC:8602]	MSTRG.21860.1	MSTRG.21860	.	yes	novel	trans	NA	-38.45	0.957325
ENSSSCT00000006045	0	chr1	287904367	288136642	MSTRG.2776	PAPPA	yes	GO:0005615(extracellular space);GO:0005576(extracellular region);GO:0006508(proteolysis);GO:0008237(metallopeptidase activity);GO:0004222(metalloendopeptidase activity);GO:0004175(endopeptidase activity)	NA	NA	NA	pappalysin 1 [Source:HGNC Symbol;Acc:HGNC:8602]	MSTRG.22503.1	MSTRG.22503	CIART	yes	novel	trans	NA	-22.88	0.956852
ENSSSCT00000006045	0	chr1	287904367	288136642	MSTRG.2776	PAPPA	yes	GO:0005615(extracellular space);GO:0005576(extracellular region);GO:0006508(proteolysis);GO:0008237(metallopeptidase activity);GO:0004222(metalloendopeptidase activity);GO:0004175(endopeptidase activity)	NA	NA	NA	pappalysin 1 [Source:HGNC Symbol;Acc:HGNC:8602]	MSTRG.23310.1	MSTRG.23310	.	yes	novel	trans	NA	-27.76	-0.970435
ENSSSCT00000006045	0	chr1	287904367	288136642	MSTRG.2776	PAPPA	yes	GO:0005615(extracellular space);GO:0005576(extracellular region);GO:0006508(proteolysis);GO:0008237(metallopeptidase activity);GO:0004222(metalloendopeptidase activity);GO:0004175(endopeptidase activity)	NA	NA	NA	pappalysin 1 [Source:HGNC Symbol;Acc:HGNC:8602]	MSTRG.24277.1	MSTRG.24277	.	yes	novel	trans	NA	-33.75	0.993363
ENSSSCT00000006045	0	chr1	287904367	288136642	MSTRG.2776	PAPPA	yes	GO:0005615(extracellular space);GO:0005576(extracellular region);GO:0006508(proteolysis);GO:0008237(metallopeptidase activity);GO:0004222(metalloendopeptidase activity);GO:0004175(endopeptidase activity)	NA	NA	NA	pappalysin 1 [Source:HGNC Symbol;Acc:HGNC:8602]	MSTRG.24765.1	MSTRG.24765	ACSS3	yes	novel	trans	NA	-38.40	0.975778
ENSSSCT00000006045	0	chr1	287904367	288136642	MSTRG.2776	PAPPA	yes	GO:0005615(extracellular space);GO:0005576(extracellular region);GO:0006508(proteolysis);GO:0008237(metallopeptidase activity);GO:0004222(metalloendopeptidase activity);GO:0004175(endopeptidase activity)	NA	NA	NA	pappalysin 1 [Source:HGNC Symbol;Acc:HGNC:8602]	MSTRG.26444.1	MSTRG.26444	.	yes	novel	trans	NA	-45.07	0.973585
ENSSSCT00000006045	0	chr1	287904367	288136642	MSTRG.2776	PAPPA	yes	GO:0005615(extracellular space);GO:0005576(extracellular region);GO:0006508(proteolysis);GO:0008237(metallopeptidase activity);GO:0004222(metalloendopeptidase activity);GO:0004175(endopeptidase activity)	NA	NA	NA	pappalysin 1 [Source:HGNC Symbol;Acc:HGNC:8602]	MSTRG.26758.1	MSTRG.26758	ENSSSCG00000027352	yes	novel	trans	NA	-38.48	0.995616
ENSSSCT00000006045	0	chr1	287904367	288136642	MSTRG.2776	PAPPA	yes	GO:0005615(extracellular space);GO:0005576(extracellular region);GO:0006508(proteolysis);GO:0008237(metallopeptidase activity);GO:0004222(metalloendopeptidase activity);GO:0004175(endopeptidase activity)	NA	NA	NA	pappalysin 1 [Source:HGNC Symbol;Acc:HGNC:8602]	MSTRG.27290.1	MSTRG.27290	.	yes	novel	trans	NA	-25.06	0.955396
ENSSSCT00000006045	0	chr1	287904367	288136642	MSTRG.2776	PAPPA	yes	GO:0005615(extracellular space);GO:0005576(extracellular region);GO:0006508(proteolysis);GO:0008237(metallopeptidase activity);GO:0004222(metalloendopeptidase activity);GO:0004175(endopeptidase activity)	NA	NA	NA	pappalysin 1 [Source:HGNC Symbol;Acc:HGNC:8602]	MSTRG.27332.1	MSTRG.27332	.	yes	novel	trans	NA	-28.94	0.98546
ENSSSCT00000006045	0	chr1	287904367	288136642	MSTRG.2776	PAPPA	yes	GO:0005615(extracellular space);GO:0005576(extracellular region);GO:0006508(proteolysis);GO:0008237(metallopeptidase activity);GO:0004222(metalloendopeptidase activity);GO:0004175(endopeptidase activity)	NA	NA	NA	pappalysin 1 [Source:HGNC Symbol;Acc:HGNC:8602]	MSTRG.27711.1	MSTRG.27711	.	yes	novel	trans	NA	-41.59	-0.979211
ENSSSCT00000006045	0	chr1	287904367	288136642	MSTRG.2776	PAPPA	yes	GO:0005615(extracellular space);GO:0005576(extracellular region);GO:0006508(proteolysis);GO:0008237(metallopeptidase activity);GO:0004222(metalloendopeptidase activity);GO:0004175(endopeptidase activity)	NA	NA	NA	pappalysin 1 [Source:HGNC Symbol;Acc:HGNC:8602]	MSTRG.28025.1	MSTRG.28025	.	yes	novel	trans	NA	-29.27	0.973934
ENSSSCT00000006045	0	chr1	287904367	288136642	MSTRG.2776	PAPPA	yes	GO:0005615(extracellular space);GO:0005576(extracellular region);GO:0006508(proteolysis);GO:0008237(metallopeptidase activity);GO:0004222(metalloendopeptidase activity);GO:0004175(endopeptidase activity)	NA	NA	NA	pappalysin 1 [Source:HGNC Symbol;Acc:HGNC:8602]	MSTRG.28708.1	MSTRG.28708	.	yes	novel	trans	NA	-30.77	0.97943
ENSSSCT00000006045	0	chr1	287904367	288136642	MSTRG.2776	PAPPA	yes	GO:0005615(extracellular space);GO:0005576(extracellular region);GO:0006508(proteolysis);GO:0008237(metallopeptidase activity);GO:0004222(metalloendopeptidase activity);GO:0004175(endopeptidase activity)	NA	NA	NA	pappalysin 1 [Source:HGNC Symbol;Acc:HGNC:8602]	MSTRG.28979.5	MSTRG.28979	SNORA79	yes	novel	trans	NA	-46.81	0.989308
ENSSSCT00000006045	0	chr1	287904367	288136642	MSTRG.2776	PAPPA	yes	GO:0005615(extracellular space);GO:0005576(extracellular region);GO:0006508(proteolysis);GO:0008237(metallopeptidase activity);GO:0004222(metalloendopeptidase activity);GO:0004175(endopeptidase activity)	NA	NA	NA	pappalysin 1 [Source:HGNC Symbol;Acc:HGNC:8602]	MSTRG.28976.1	MSTRG.28976	.	yes	novel	trans	NA	-22.34	0.983493
ENSSSCT00000006045	0	chr1	287904367	288136642	MSTRG.2776	PAPPA	yes	GO:0005615(extracellular space);GO:0005576(extracellular region);GO:0006508(proteolysis);GO:0008237(metallopeptidase activity);GO:0004222(metalloendopeptidase activity);GO:0004175(endopeptidase activity)	NA	NA	NA	pappalysin 1 [Source:HGNC Symbol;Acc:HGNC:8602]	MSTRG.30173.1	MSTRG.30173	CXCL2	yes	novel	trans	NA	-16.41	0.991422
ENSSSCT00000006045	0	chr1	287904367	288136642	MSTRG.2776	PAPPA	yes	GO:0005615(extracellular space);GO:0005576(extracellular region);GO:0006508(proteolysis);GO:0008237(metallopeptidase activity);GO:0004222(metalloendopeptidase activity);GO:0004175(endopeptidase activity)	NA	NA	NA	pappalysin 1 [Source:HGNC Symbol;Acc:HGNC:8602]	MSTRG.30209.1	MSTRG.30209	.	yes	novel	trans	NA	-45.53	0.956982
ENSSSCT00000006045	0	chr1	287904367	288136642	MSTRG.2776	PAPPA	yes	GO:0005615(extracellular space);GO:0005576(extracellular region);GO:0006508(proteolysis);GO:0008237(metallopeptidase activity);GO:0004222(metalloendopeptidase activity);GO:0004175(endopeptidase activity)	NA	NA	NA	pappalysin 1 [Source:HGNC Symbol;Acc:HGNC:8602]	MSTRG.30732.1	MSTRG.30732	.	yes	novel	trans	NA	-32.14	0.981456
ENSSSCT00000006045	0	chr1	287904367	288136642	MSTRG.2776	PAPPA	yes	GO:0005615(extracellular space);GO:0005576(extracellular region);GO:0006508(proteolysis);GO:0008237(metallopeptidase activity);GO:0004222(metalloendopeptidase activity);GO:0004175(endopeptidase activity)	NA	NA	NA	pappalysin 1 [Source:HGNC Symbol;Acc:HGNC:8602]	MSTRG.31692.1	MSTRG.31692	.	yes	novel	trans	NA	-43.16	0.984951
ENSSSCT00000006045	0	chr1	287904367	288136642	MSTRG.2776	PAPPA	yes	GO:0005615(extracellular space);GO:0005576(extracellular region);GO:0006508(proteolysis);GO:0008237(metallopeptidase activity);GO:0004222(metalloendopeptidase activity);GO:0004175(endopeptidase activity)	NA	NA	NA	pappalysin 1 [Source:HGNC Symbol;Acc:HGNC:8602]	MSTRG.31992.1	MSTRG.31992	.	yes	novel	trans	NA	-28.77	0.958801
ENSSSCT00000006060	0	chr1	293001771	293012545	MSTRG.2788	ENSSSCG00000005510	yes	GO:0046872(metal ion binding);GO:0008270(zinc ion binding)	NA	NA	NA	NA	MSTRG.5886.1	MSTRG.5886	.	yes	novel	trans	NA	-28.03	-0.980246
ENSSSCT00000006060	0	chr1	293001771	293012545	MSTRG.2788	ENSSSCG00000005510	yes	GO:0046872(metal ion binding);GO:0008270(zinc ion binding)	NA	NA	NA	NA	MSTRG.6301.1	MSTRG.6301	.	yes	novel	trans	NA	-44.07	-0.951663
ENSSSCT00000006060	0	chr1	293001771	293012545	MSTRG.2788	ENSSSCG00000005510	yes	GO:0046872(metal ion binding);GO:0008270(zinc ion binding)	NA	NA	NA	NA	MSTRG.8436.1	MSTRG.8436	.	yes	novel	trans	NA	-31.93	-0.959219
ENSSSCT00000006060	0	chr1	293001771	293012545	MSTRG.2788	ENSSSCG00000005510	yes	GO:0046872(metal ion binding);GO:0008270(zinc ion binding)	NA	NA	NA	NA	MSTRG.8882.1	MSTRG.8882	.	yes	novel	trans	NA	-45.80	0.955249
ENSSSCT00000006060	0	chr1	293001771	293012545	MSTRG.2788	ENSSSCG00000005510	yes	GO:0046872(metal ion binding);GO:0008270(zinc ion binding)	NA	NA	NA	NA	MSTRG.10360.1	MSTRG.10360	.	yes	novel	trans	NA	-26.54	-0.951779
ENSSSCT00000006060	0	chr1	293001771	293012545	MSTRG.2788	ENSSSCG00000005510	yes	GO:0046872(metal ion binding);GO:0008270(zinc ion binding)	NA	NA	NA	NA	MSTRG.12579.1	MSTRG.12579	.	yes	novel	trans	NA	-49.76	-0.973154
ENSSSCT00000006060	0	chr1	293001771	293012545	MSTRG.2788	ENSSSCG00000005510	yes	GO:0046872(metal ion binding);GO:0008270(zinc ion binding)	NA	NA	NA	NA	MSTRG.13917.1	MSTRG.13917	.	yes	novel	trans	NA	-51.41	-0.969307
ENSSSCT00000006060	0	chr1	293001771	293012545	MSTRG.2788	ENSSSCG00000005510	yes	GO:0046872(metal ion binding);GO:0008270(zinc ion binding)	NA	NA	NA	NA	MSTRG.14046.1	MSTRG.14046	.	yes	novel	trans	NA	-49.24	-0.963177
ENSSSCT00000006060	0	chr1	293001771	293012545	MSTRG.2788	ENSSSCG00000005510	yes	GO:0046872(metal ion binding);GO:0008270(zinc ion binding)	NA	NA	NA	NA	MSTRG.16681.1	MSTRG.16681	.	yes	novel	trans	NA	-43.26	-0.954411
ENSSSCT00000006060	0	chr1	293001771	293012545	MSTRG.2788	ENSSSCG00000005510	yes	GO:0046872(metal ion binding);GO:0008270(zinc ion binding)	NA	NA	NA	NA	MSTRG.16956.1	MSTRG.16956	.	yes	novel	trans	NA	-30.60	-0.950687
ENSSSCT00000006060	0	chr1	293001771	293012545	MSTRG.2788	ENSSSCG00000005510	yes	GO:0046872(metal ion binding);GO:0008270(zinc ion binding)	NA	NA	NA	NA	MSTRG.19762.1	MSTRG.19762	.	yes	novel	trans	NA	-43.97	-0.963288
ENSSSCT00000006060	0	chr1	293001771	293012545	MSTRG.2788	ENSSSCG00000005510	yes	GO:0046872(metal ion binding);GO:0008270(zinc ion binding)	NA	NA	NA	NA	MSTRG.22657.1	MSTRG.22657	IGSF3	yes	novel	trans	NA	-46.09	-0.984731
ENSSSCT00000006060	0	chr1	293001771	293012545	MSTRG.2788	ENSSSCG00000005510	yes	GO:0046872(metal ion binding);GO:0008270(zinc ion binding)	NA	NA	NA	NA	MSTRG.24277.1	MSTRG.24277	.	yes	novel	trans	NA	-33.72	-0.96116
ENSSSCT00000006060	0	chr1	293001771	293012545	MSTRG.2788	ENSSSCG00000005510	yes	GO:0046872(metal ion binding);GO:0008270(zinc ion binding)	NA	NA	NA	NA	MSTRG.24765.1	MSTRG.24765	ACSS3	yes	novel	trans	NA	-41.36	-0.989094
ENSSSCT00000006060	0	chr1	293001771	293012545	MSTRG.2788	ENSSSCG00000005510	yes	GO:0046872(metal ion binding);GO:0008270(zinc ion binding)	NA	NA	NA	NA	MSTRG.26758.1	MSTRG.26758	ENSSSCG00000027352	yes	novel	trans	NA	-40.24	-0.975523
ENSSSCT00000006060	0	chr1	293001771	293012545	MSTRG.2788	ENSSSCG00000005510	yes	GO:0046872(metal ion binding);GO:0008270(zinc ion binding)	NA	NA	NA	NA	MSTRG.27332.1	MSTRG.27332	.	yes	novel	trans	NA	-46.55	-0.972629
ENSSSCT00000006060	0	chr1	293001771	293012545	MSTRG.2788	ENSSSCG00000005510	yes	GO:0046872(metal ion binding);GO:0008270(zinc ion binding)	NA	NA	NA	NA	MSTRG.27711.1	MSTRG.27711	.	yes	novel	trans	NA	-35.49	0.963881
ENSSSCT00000006060	0	chr1	293001771	293012545	MSTRG.2788	ENSSSCG00000005510	yes	GO:0046872(metal ion binding);GO:0008270(zinc ion binding)	NA	NA	NA	NA	MSTRG.28441.1	MSTRG.28441	.	yes	novel	trans	NA	-37.69	0.951493
ENSSSCT00000006060	0	chr1	293001771	293012545	MSTRG.2788	ENSSSCG00000005510	yes	GO:0046872(metal ion binding);GO:0008270(zinc ion binding)	NA	NA	NA	NA	MSTRG.28708.1	MSTRG.28708	.	yes	novel	trans	NA	-49.79	-0.960186
ENSSSCT00000006060	0	chr1	293001771	293012545	MSTRG.2788	ENSSSCG00000005510	yes	GO:0046872(metal ion binding);GO:0008270(zinc ion binding)	NA	NA	NA	NA	MSTRG.28979.5	MSTRG.28979	SNORA79	yes	novel	trans	NA	-45.36	-0.984022
ENSSSCT00000006060	0	chr1	293001771	293012545	MSTRG.2788	ENSSSCG00000005510	yes	GO:0046872(metal ion binding);GO:0008270(zinc ion binding)	NA	NA	NA	NA	MSTRG.28976.1	MSTRG.28976	.	yes	novel	trans	NA	-35.70	-0.9766
ENSSSCT00000006060	0	chr1	293001771	293012545	MSTRG.2788	ENSSSCG00000005510	yes	GO:0046872(metal ion binding);GO:0008270(zinc ion binding)	NA	NA	NA	NA	MSTRG.30173.1	MSTRG.30173	CXCL2	yes	novel	trans	NA	-40.84	-0.983586
ENSSSCT00000006060	0	chr1	293001771	293012545	MSTRG.2788	ENSSSCG00000005510	yes	GO:0046872(metal ion binding);GO:0008270(zinc ion binding)	NA	NA	NA	NA	MSTRG.31692.1	MSTRG.31692	.	yes	novel	trans	NA	-42.19	-0.985572
ENSSSCT00000006067	0	chr1	293510864	293528679	MSTRG.2802	STOM	yes	GO:0072562(blood microparticle);GO:0070062(extracellular exosome);GO:0048471(perinuclear region of cytoplasm);GO:0045121(membrane raft);GO:0031982(vesicle);GO:0016021(integral component of membrane);GO:0016020(membrane);GO:0005887(integral component of plasma membrane);GO:0005856(cytoskeleton);GO:0005829(cytosol);GO:0005783(endoplasmic reticulum);GO:0005739(mitochondrion);GO:0005737(cytoplasm);GO…	NA	NA	NA	stomatin [Source:HGNC Symbol;Acc:HGNC:3383]	MSTRG.3988.1	MSTRG.3988	.	yes	novel	trans	NA	-43.32	-0.956565
ENSSSCT00000006067	0	chr1	293510864	293528679	MSTRG.2802	STOM	yes	GO:0072562(blood microparticle);GO:0070062(extracellular exosome);GO:0048471(perinuclear region of cytoplasm);GO:0045121(membrane raft);GO:0031982(vesicle);GO:0016021(integral component of membrane);GO:0016020(membrane);GO:0005887(integral component of plasma membrane);GO:0005856(cytoskeleton);GO:0005829(cytosol);GO:0005783(endoplasmic reticulum);GO:0005739(mitochondrion);GO:0005737(cytoplasm);GO…	NA	NA	NA	stomatin [Source:HGNC Symbol;Acc:HGNC:3383]	MSTRG.4592.1	MSTRG.4592	.	yes	novel	trans	NA	-53.86	0.969961
ENSSSCT00000006067	0	chr1	293510864	293528679	MSTRG.2802	STOM	yes	GO:0072562(blood microparticle);GO:0070062(extracellular exosome);GO:0048471(perinuclear region of cytoplasm);GO:0045121(membrane raft);GO:0031982(vesicle);GO:0016021(integral component of membrane);GO:0016020(membrane);GO:0005887(integral component of plasma membrane);GO:0005856(cytoskeleton);GO:0005829(cytosol);GO:0005783(endoplasmic reticulum);GO:0005739(mitochondrion);GO:0005737(cytoplasm);GO…	NA	NA	NA	stomatin [Source:HGNC Symbol;Acc:HGNC:3383]	MSTRG.4625.3	MSTRG.4625	.	yes	novel	trans	NA	-24.04	0.98653
ENSSSCT00000006067	0	chr1	293510864	293528679	MSTRG.2802	STOM	yes	GO:0072562(blood microparticle);GO:0070062(extracellular exosome);GO:0048471(perinuclear region of cytoplasm);GO:0045121(membrane raft);GO:0031982(vesicle);GO:0016021(integral component of membrane);GO:0016020(membrane);GO:0005887(integral component of plasma membrane);GO:0005856(cytoskeleton);GO:0005829(cytosol);GO:0005783(endoplasmic reticulum);GO:0005739(mitochondrion);GO:0005737(cytoplasm);GO…	NA	NA	NA	stomatin [Source:HGNC Symbol;Acc:HGNC:3383]	MSTRG.5886.1	MSTRG.5886	.	yes	novel	trans	NA	-37.41	0.951995
ENSSSCT00000006067	0	chr1	293510864	293528679	MSTRG.2802	STOM	yes	GO:0072562(blood microparticle);GO:0070062(extracellular exosome);GO:0048471(perinuclear region of cytoplasm);GO:0045121(membrane raft);GO:0031982(vesicle);GO:0016021(integral component of membrane);GO:0016020(membrane);GO:0005887(integral component of plasma membrane);GO:0005856(cytoskeleton);GO:0005829(cytosol);GO:0005783(endoplasmic reticulum);GO:0005739(mitochondrion);GO:0005737(cytoplasm);GO…	NA	NA	NA	stomatin [Source:HGNC Symbol;Acc:HGNC:3383]	MSTRG.6301.1	MSTRG.6301	.	yes	novel	trans	NA	-50.33	0.96996
ENSSSCT00000006067	0	chr1	293510864	293528679	MSTRG.2802	STOM	yes	GO:0072562(blood microparticle);GO:0070062(extracellular exosome);GO:0048471(perinuclear region of cytoplasm);GO:0045121(membrane raft);GO:0031982(vesicle);GO:0016021(integral component of membrane);GO:0016020(membrane);GO:0005887(integral component of plasma membrane);GO:0005856(cytoskeleton);GO:0005829(cytosol);GO:0005783(endoplasmic reticulum);GO:0005739(mitochondrion);GO:0005737(cytoplasm);GO…	NA	NA	NA	stomatin [Source:HGNC Symbol;Acc:HGNC:3383]	MSTRG.6500.1	MSTRG.6500	.	yes	novel	trans	NA	-18.83	0.976186
ENSSSCT00000006067	0	chr1	293510864	293528679	MSTRG.2802	STOM	yes	GO:0072562(blood microparticle);GO:0070062(extracellular exosome);GO:0048471(perinuclear region of cytoplasm);GO:0045121(membrane raft);GO:0031982(vesicle);GO:0016021(integral component of membrane);GO:0016020(membrane);GO:0005887(integral component of plasma membrane);GO:0005856(cytoskeleton);GO:0005829(cytosol);GO:0005783(endoplasmic reticulum);GO:0005739(mitochondrion);GO:0005737(cytoplasm);GO…	NA	NA	NA	stomatin [Source:HGNC Symbol;Acc:HGNC:3383]	MSTRG.7456.1	MSTRG.7456	IL17RB	yes	novel	trans	NA	-38.98	-0.950552
ENSSSCT00000006067	0	chr1	293510864	293528679	MSTRG.2802	STOM	yes	GO:0072562(blood microparticle);GO:0070062(extracellular exosome);GO:0048471(perinuclear region of cytoplasm);GO:0045121(membrane raft);GO:0031982(vesicle);GO:0016021(integral component of membrane);GO:0016020(membrane);GO:0005887(integral component of plasma membrane);GO:0005856(cytoskeleton);GO:0005829(cytosol);GO:0005783(endoplasmic reticulum);GO:0005739(mitochondrion);GO:0005737(cytoplasm);GO…	NA	NA	NA	stomatin [Source:HGNC Symbol;Acc:HGNC:3383]	MSTRG.8436.1	MSTRG.8436	.	yes	novel	trans	NA	-40.76	0.964724
ENSSSCT00000006067	0	chr1	293510864	293528679	MSTRG.2802	STOM	yes	GO:0072562(blood microparticle);GO:0070062(extracellular exosome);GO:0048471(perinuclear region of cytoplasm);GO:0045121(membrane raft);GO:0031982(vesicle);GO:0016021(integral component of membrane);GO:0016020(membrane);GO:0005887(integral component of plasma membrane);GO:0005856(cytoskeleton);GO:0005829(cytosol);GO:0005783(endoplasmic reticulum);GO:0005739(mitochondrion);GO:0005737(cytoplasm);GO…	NA	NA	NA	stomatin [Source:HGNC Symbol;Acc:HGNC:3383]	MSTRG.8882.1	MSTRG.8882	.	yes	novel	trans	NA	-53.76	-0.980954
ENSSSCT00000006067	0	chr1	293510864	293528679	MSTRG.2802	STOM	yes	GO:0072562(blood microparticle);GO:0070062(extracellular exosome);GO:0048471(perinuclear region of cytoplasm);GO:0045121(membrane raft);GO:0031982(vesicle);GO:0016021(integral component of membrane);GO:0016020(membrane);GO:0005887(integral component of plasma membrane);GO:0005856(cytoskeleton);GO:0005829(cytosol);GO:0005783(endoplasmic reticulum);GO:0005739(mitochondrion);GO:0005737(cytoplasm);GO…	NA	NA	NA	stomatin [Source:HGNC Symbol;Acc:HGNC:3383]	MSTRG.11081.1	MSTRG.11081	.	yes	novel	trans	NA	-25.80	-0.980109
ENSSSCT00000006067	0	chr1	293510864	293528679	MSTRG.2802	STOM	yes	GO:0072562(blood microparticle);GO:0070062(extracellular exosome);GO:0048471(perinuclear region of cytoplasm);GO:0045121(membrane raft);GO:0031982(vesicle);GO:0016021(integral component of membrane);GO:0016020(membrane);GO:0005887(integral component of plasma membrane);GO:0005856(cytoskeleton);GO:0005829(cytosol);GO:0005783(endoplasmic reticulum);GO:0005739(mitochondrion);GO:0005737(cytoplasm);GO…	NA	NA	NA	stomatin [Source:HGNC Symbol;Acc:HGNC:3383]	MSTRG.11777.1	MSTRG.11777	.	yes	novel	trans	NA	-39.89	0.963916
ENSSSCT00000006067	0	chr1	293510864	293528679	MSTRG.2802	STOM	yes	GO:0072562(blood microparticle);GO:0070062(extracellular exosome);GO:0048471(perinuclear region of cytoplasm);GO:0045121(membrane raft);GO:0031982(vesicle);GO:0016021(integral component of membrane);GO:0016020(membrane);GO:0005887(integral component of plasma membrane);GO:0005856(cytoskeleton);GO:0005829(cytosol);GO:0005783(endoplasmic reticulum);GO:0005739(mitochondrion);GO:0005737(cytoplasm);GO…	NA	NA	NA	stomatin [Source:HGNC Symbol;Acc:HGNC:3383]	MSTRG.13663.1	MSTRG.13663	.	yes	novel	trans	NA	-50.86	0.954974
ENSSSCT00000006067	0	chr1	293510864	293528679	MSTRG.2802	STOM	yes	GO:0072562(blood microparticle);GO:0070062(extracellular exosome);GO:0048471(perinuclear region of cytoplasm);GO:0045121(membrane raft);GO:0031982(vesicle);GO:0016021(integral component of membrane);GO:0016020(membrane);GO:0005887(integral component of plasma membrane);GO:0005856(cytoskeleton);GO:0005829(cytosol);GO:0005783(endoplasmic reticulum);GO:0005739(mitochondrion);GO:0005737(cytoplasm);GO…	NA	NA	NA	stomatin [Source:HGNC Symbol;Acc:HGNC:3383]	MSTRG.13917.1	MSTRG.13917	.	yes	novel	trans	NA	-52.44	0.979316
ENSSSCT00000006067	0	chr1	293510864	293528679	MSTRG.2802	STOM	yes	GO:0072562(blood microparticle);GO:0070062(extracellular exosome);GO:0048471(perinuclear region of cytoplasm);GO:0045121(membrane raft);GO:0031982(vesicle);GO:0016021(integral component of membrane);GO:0016020(membrane);GO:0005887(integral component of plasma membrane);GO:0005856(cytoskeleton);GO:0005829(cytosol);GO:0005783(endoplasmic reticulum);GO:0005739(mitochondrion);GO:0005737(cytoplasm);GO…	NA	NA	NA	stomatin [Source:HGNC Symbol;Acc:HGNC:3383]	MSTRG.14046.1	MSTRG.14046	.	yes	novel	trans	NA	-60.81	0.977457
ENSSSCT00000006067	0	chr1	293510864	293528679	MSTRG.2802	STOM	yes	GO:0072562(blood microparticle);GO:0070062(extracellular exosome);GO:0048471(perinuclear region of cytoplasm);GO:0045121(membrane raft);GO:0031982(vesicle);GO:0016021(integral component of membrane);GO:0016020(membrane);GO:0005887(integral component of plasma membrane);GO:0005856(cytoskeleton);GO:0005829(cytosol);GO:0005783(endoplasmic reticulum);GO:0005739(mitochondrion);GO:0005737(cytoplasm);GO…	NA	NA	NA	stomatin [Source:HGNC Symbol;Acc:HGNC:3383]	MSTRG.15022.1	MSTRG.15022	CEP250	yes	novel	trans	NA	-46.78	-0.950266
ENSSSCT00000006067	0	chr1	293510864	293528679	MSTRG.2802	STOM	yes	GO:0072562(blood microparticle);GO:0070062(extracellular exosome);GO:0048471(perinuclear region of cytoplasm);GO:0045121(membrane raft);GO:0031982(vesicle);GO:0016021(integral component of membrane);GO:0016020(membrane);GO:0005887(integral component of plasma membrane);GO:0005856(cytoskeleton);GO:0005829(cytosol);GO:0005783(endoplasmic reticulum);GO:0005739(mitochondrion);GO:0005737(cytoplasm);GO…	NA	NA	NA	stomatin [Source:HGNC Symbol;Acc:HGNC:3383]	MSTRG.15360.1	MSTRG.15360	.	yes	novel	trans	NA	-52.36	-0.973131
ENSSSCT00000006067	0	chr1	293510864	293528679	MSTRG.2802	STOM	yes	GO:0072562(blood microparticle);GO:0070062(extracellular exosome);GO:0048471(perinuclear region of cytoplasm);GO:0045121(membrane raft);GO:0031982(vesicle);GO:0016021(integral component of membrane);GO:0016020(membrane);GO:0005887(integral component of plasma membrane);GO:0005856(cytoskeleton);GO:0005829(cytosol);GO:0005783(endoplasmic reticulum);GO:0005739(mitochondrion);GO:0005737(cytoplasm);GO…	NA	NA	NA	stomatin [Source:HGNC Symbol;Acc:HGNC:3383]	MSTRG.16154.1	MSTRG.16154	.	yes	novel	trans	NA	-53.10	0.959934
ENSSSCT00000006067	0	chr1	293510864	293528679	MSTRG.2802	STOM	yes	GO:0072562(blood microparticle);GO:0070062(extracellular exosome);GO:0048471(perinuclear region of cytoplasm);GO:0045121(membrane raft);GO:0031982(vesicle);GO:0016021(integral component of membrane);GO:0016020(membrane);GO:0005887(integral component of plasma membrane);GO:0005856(cytoskeleton);GO:0005829(cytosol);GO:0005783(endoplasmic reticulum);GO:0005739(mitochondrion);GO:0005737(cytoplasm);GO…	NA	NA	NA	stomatin [Source:HGNC Symbol;Acc:HGNC:3383]	MSTRG.19762.1	MSTRG.19762	.	yes	novel	trans	NA	-40.46	0.983469
ENSSSCT00000006067	0	chr1	293510864	293528679	MSTRG.2802	STOM	yes	GO:0072562(blood microparticle);GO:0070062(extracellular exosome);GO:0048471(perinuclear region of cytoplasm);GO:0045121(membrane raft);GO:0031982(vesicle);GO:0016021(integral component of membrane);GO:0016020(membrane);GO:0005887(integral component of plasma membrane);GO:0005856(cytoskeleton);GO:0005829(cytosol);GO:0005783(endoplasmic reticulum);GO:0005739(mitochondrion);GO:0005737(cytoplasm);GO…	NA	NA	NA	stomatin [Source:HGNC Symbol;Acc:HGNC:3383]	MSTRG.21596.1	MSTRG.21596	.	yes	novel	trans	NA	-31.65	0.961794
ENSSSCT00000006067	0	chr1	293510864	293528679	MSTRG.2802	STOM	yes	GO:0072562(blood microparticle);GO:0070062(extracellular exosome);GO:0048471(perinuclear region of cytoplasm);GO:0045121(membrane raft);GO:0031982(vesicle);GO:0016021(integral component of membrane);GO:0016020(membrane);GO:0005887(integral component of plasma membrane);GO:0005856(cytoskeleton);GO:0005829(cytosol);GO:0005783(endoplasmic reticulum);GO:0005739(mitochondrion);GO:0005737(cytoplasm);GO…	NA	NA	NA	stomatin [Source:HGNC Symbol;Acc:HGNC:3383]	MSTRG.21860.1	MSTRG.21860	.	yes	novel	trans	NA	-20.99	0.980315
ENSSSCT00000006067	0	chr1	293510864	293528679	MSTRG.2802	STOM	yes	GO:0072562(blood microparticle);GO:0070062(extracellular exosome);GO:0048471(perinuclear region of cytoplasm);GO:0045121(membrane raft);GO:0031982(vesicle);GO:0016021(integral component of membrane);GO:0016020(membrane);GO:0005887(integral component of plasma membrane);GO:0005856(cytoskeleton);GO:0005829(cytosol);GO:0005783(endoplasmic reticulum);GO:0005739(mitochondrion);GO:0005737(cytoplasm);GO…	NA	NA	NA	stomatin [Source:HGNC Symbol;Acc:HGNC:3383]	MSTRG.22503.1	MSTRG.22503	CIART	yes	novel	trans	NA	-38.43	0.951852
ENSSSCT00000006067	0	chr1	293510864	293528679	MSTRG.2802	STOM	yes	GO:0072562(blood microparticle);GO:0070062(extracellular exosome);GO:0048471(perinuclear region of cytoplasm);GO:0045121(membrane raft);GO:0031982(vesicle);GO:0016021(integral component of membrane);GO:0016020(membrane);GO:0005887(integral component of plasma membrane);GO:0005856(cytoskeleton);GO:0005829(cytosol);GO:0005783(endoplasmic reticulum);GO:0005739(mitochondrion);GO:0005737(cytoplasm);GO…	NA	NA	NA	stomatin [Source:HGNC Symbol;Acc:HGNC:3383]	MSTRG.22657.1	MSTRG.22657	IGSF3	yes	novel	trans	NA	-15.56	0.956821
ENSSSCT00000006067	0	chr1	293510864	293528679	MSTRG.2802	STOM	yes	GO:0072562(blood microparticle);GO:0070062(extracellular exosome);GO:0048471(perinuclear region of cytoplasm);GO:0045121(membrane raft);GO:0031982(vesicle);GO:0016021(integral component of membrane);GO:0016020(membrane);GO:0005887(integral component of plasma membrane);GO:0005856(cytoskeleton);GO:0005829(cytosol);GO:0005783(endoplasmic reticulum);GO:0005739(mitochondrion);GO:0005737(cytoplasm);GO…	NA	NA	NA	stomatin [Source:HGNC Symbol;Acc:HGNC:3383]	MSTRG.22782.1	MSTRG.22782	.	yes	novel	trans	NA	-23.26	0.959022
ENSSSCT00000006067	0	chr1	293510864	293528679	MSTRG.2802	STOM	yes	GO:0072562(blood microparticle);GO:0070062(extracellular exosome);GO:0048471(perinuclear region of cytoplasm);GO:0045121(membrane raft);GO:0031982(vesicle);GO:0016021(integral component of membrane);GO:0016020(membrane);GO:0005887(integral component of plasma membrane);GO:0005856(cytoskeleton);GO:0005829(cytosol);GO:0005783(endoplasmic reticulum);GO:0005739(mitochondrion);GO:0005737(cytoplasm);GO…	NA	NA	NA	stomatin [Source:HGNC Symbol;Acc:HGNC:3383]	MSTRG.23105.1	MSTRG.23105	.	yes	novel	trans	NA	-14.86	0.971933
ENSSSCT00000006067	0	chr1	293510864	293528679	MSTRG.2802	STOM	yes	GO:0072562(blood microparticle);GO:0070062(extracellular exosome);GO:0048471(perinuclear region of cytoplasm);GO:0045121(membrane raft);GO:0031982(vesicle);GO:0016021(integral component of membrane);GO:0016020(membrane);GO:0005887(integral component of plasma membrane);GO:0005856(cytoskeleton);GO:0005829(cytosol);GO:0005783(endoplasmic reticulum);GO:0005739(mitochondrion);GO:0005737(cytoplasm);GO…	NA	NA	NA	stomatin [Source:HGNC Symbol;Acc:HGNC:3383]	MSTRG.24277.1	MSTRG.24277	.	yes	novel	trans	NA	-48.21	0.988831
ENSSSCT00000006067	0	chr1	293510864	293528679	MSTRG.2802	STOM	yes	GO:0072562(blood microparticle);GO:0070062(extracellular exosome);GO:0048471(perinuclear region of cytoplasm);GO:0045121(membrane raft);GO:0031982(vesicle);GO:0016021(integral component of membrane);GO:0016020(membrane);GO:0005887(integral component of plasma membrane);GO:0005856(cytoskeleton);GO:0005829(cytosol);GO:0005783(endoplasmic reticulum);GO:0005739(mitochondrion);GO:0005737(cytoplasm);GO…	NA	NA	NA	stomatin [Source:HGNC Symbol;Acc:HGNC:3383]	MSTRG.24765.1	MSTRG.24765	ACSS3	yes	novel	trans	NA	-37.26	0.965064
ENSSSCT00000006067	0	chr1	293510864	293528679	MSTRG.2802	STOM	yes	GO:0072562(blood microparticle);GO:0070062(extracellular exosome);GO:0048471(perinuclear region of cytoplasm);GO:0045121(membrane raft);GO:0031982(vesicle);GO:0016021(integral component of membrane);GO:0016020(membrane);GO:0005887(integral component of plasma membrane);GO:0005856(cytoskeleton);GO:0005829(cytosol);GO:0005783(endoplasmic reticulum);GO:0005739(mitochondrion);GO:0005737(cytoplasm);GO…	NA	NA	NA	stomatin [Source:HGNC Symbol;Acc:HGNC:3383]	MSTRG.24799.1	MSTRG.24799	.	yes	novel	trans	NA	-47.63	0.981201
ENSSSCT00000006067	0	chr1	293510864	293528679	MSTRG.2802	STOM	yes	GO:0072562(blood microparticle);GO:0070062(extracellular exosome);GO:0048471(perinuclear region of cytoplasm);GO:0045121(membrane raft);GO:0031982(vesicle);GO:0016021(integral component of membrane);GO:0016020(membrane);GO:0005887(integral component of plasma membrane);GO:0005856(cytoskeleton);GO:0005829(cytosol);GO:0005783(endoplasmic reticulum);GO:0005739(mitochondrion);GO:0005737(cytoplasm);GO…	NA	NA	NA	stomatin [Source:HGNC Symbol;Acc:HGNC:3383]	MSTRG.26444.1	MSTRG.26444	.	yes	novel	trans	NA	-46.19	0.952308
ENSSSCT00000006067	0	chr1	293510864	293528679	MSTRG.2802	STOM	yes	GO:0072562(blood microparticle);GO:0070062(extracellular exosome);GO:0048471(perinuclear region of cytoplasm);GO:0045121(membrane raft);GO:0031982(vesicle);GO:0016021(integral component of membrane);GO:0016020(membrane);GO:0005887(integral component of plasma membrane);GO:0005856(cytoskeleton);GO:0005829(cytosol);GO:0005783(endoplasmic reticulum);GO:0005739(mitochondrion);GO:0005737(cytoplasm);GO…	NA	NA	NA	stomatin [Source:HGNC Symbol;Acc:HGNC:3383]	MSTRG.26559.1	MSTRG.26559	.	yes	novel	trans	NA	-14.85	0.976975
ENSSSCT00000006067	0	chr1	293510864	293528679	MSTRG.2802	STOM	yes	GO:0072562(blood microparticle);GO:0070062(extracellular exosome);GO:0048471(perinuclear region of cytoplasm);GO:0045121(membrane raft);GO:0031982(vesicle);GO:0016021(integral component of membrane);GO:0016020(membrane);GO:0005887(integral component of plasma membrane);GO:0005856(cytoskeleton);GO:0005829(cytosol);GO:0005783(endoplasmic reticulum);GO:0005739(mitochondrion);GO:0005737(cytoplasm);GO…	NA	NA	NA	stomatin [Source:HGNC Symbol;Acc:HGNC:3383]	MSTRG.26758.1	MSTRG.26758	ENSSSCG00000027352	yes	novel	trans	NA	-40.82	0.968018
ENSSSCT00000006067	0	chr1	293510864	293528679	MSTRG.2802	STOM	yes	GO:0072562(blood microparticle);GO:0070062(extracellular exosome);GO:0048471(perinuclear region of cytoplasm);GO:0045121(membrane raft);GO:0031982(vesicle);GO:0016021(integral component of membrane);GO:0016020(membrane);GO:0005887(integral component of plasma membrane);GO:0005856(cytoskeleton);GO:0005829(cytosol);GO:0005783(endoplasmic reticulum);GO:0005739(mitochondrion);GO:0005737(cytoplasm);GO…	NA	NA	NA	stomatin [Source:HGNC Symbol;Acc:HGNC:3383]	MSTRG.27332.1	MSTRG.27332	.	yes	novel	trans	NA	-41.72	0.991582
ENSSSCT00000006067	0	chr1	293510864	293528679	MSTRG.2802	STOM	yes	GO:0072562(blood microparticle);GO:0070062(extracellular exosome);GO:0048471(perinuclear region of cytoplasm);GO:0045121(membrane raft);GO:0031982(vesicle);GO:0016021(integral component of membrane);GO:0016020(membrane);GO:0005887(integral component of plasma membrane);GO:0005856(cytoskeleton);GO:0005829(cytosol);GO:0005783(endoplasmic reticulum);GO:0005739(mitochondrion);GO:0005737(cytoplasm);GO…	NA	NA	NA	stomatin [Source:HGNC Symbol;Acc:HGNC:3383]	MSTRG.27711.1	MSTRG.27711	.	yes	novel	trans	NA	-39.78	-0.994905
ENSSSCT00000006067	0	chr1	293510864	293528679	MSTRG.2802	STOM	yes	GO:0072562(blood microparticle);GO:0070062(extracellular exosome);GO:0048471(perinuclear region of cytoplasm);GO:0045121(membrane raft);GO:0031982(vesicle);GO:0016021(integral component of membrane);GO:0016020(membrane);GO:0005887(integral component of plasma membrane);GO:0005856(cytoskeleton);GO:0005829(cytosol);GO:0005783(endoplasmic reticulum);GO:0005739(mitochondrion);GO:0005737(cytoplasm);GO…	NA	NA	NA	stomatin [Source:HGNC Symbol;Acc:HGNC:3383]	MSTRG.28025.1	MSTRG.28025	.	yes	novel	trans	NA	-53.57	0.973977
ENSSSCT00000006067	0	chr1	293510864	293528679	MSTRG.2802	STOM	yes	GO:0072562(blood microparticle);GO:0070062(extracellular exosome);GO:0048471(perinuclear region of cytoplasm);GO:0045121(membrane raft);GO:0031982(vesicle);GO:0016021(integral component of membrane);GO:0016020(membrane);GO:0005887(integral component of plasma membrane);GO:0005856(cytoskeleton);GO:0005829(cytosol);GO:0005783(endoplasmic reticulum);GO:0005739(mitochondrion);GO:0005737(cytoplasm);GO…	NA	NA	NA	stomatin [Source:HGNC Symbol;Acc:HGNC:3383]	MSTRG.28441.1	MSTRG.28441	.	yes	novel	trans	NA	-38.74	-0.957644
ENSSSCT00000006067	0	chr1	293510864	293528679	MSTRG.2802	STOM	yes	GO:0072562(blood microparticle);GO:0070062(extracellular exosome);GO:0048471(perinuclear region of cytoplasm);GO:0045121(membrane raft);GO:0031982(vesicle);GO:0016021(integral component of membrane);GO:0016020(membrane);GO:0005887(integral component of plasma membrane);GO:0005856(cytoskeleton);GO:0005829(cytosol);GO:0005783(endoplasmic reticulum);GO:0005739(mitochondrion);GO:0005737(cytoplasm);GO…	NA	NA	NA	stomatin [Source:HGNC Symbol;Acc:HGNC:3383]	MSTRG.28708.1	MSTRG.28708	.	yes	novel	trans	NA	-40.96	0.991389
ENSSSCT00000006067	0	chr1	293510864	293528679	MSTRG.2802	STOM	yes	GO:0072562(blood microparticle);GO:0070062(extracellular exosome);GO:0048471(perinuclear region of cytoplasm);GO:0045121(membrane raft);GO:0031982(vesicle);GO:0016021(integral component of membrane);GO:0016020(membrane);GO:0005887(integral component of plasma membrane);GO:0005856(cytoskeleton);GO:0005829(cytosol);GO:0005783(endoplasmic reticulum);GO:0005739(mitochondrion);GO:0005737(cytoplasm);GO…	NA	NA	NA	stomatin [Source:HGNC Symbol;Acc:HGNC:3383]	MSTRG.28979.5	MSTRG.28979	SNORA79	yes	novel	trans	NA	-33.51	0.971283
ENSSSCT00000006067	0	chr1	293510864	293528679	MSTRG.2802	STOM	yes	GO:0072562(blood microparticle);GO:0070062(extracellular exosome);GO:0048471(perinuclear region of cytoplasm);GO:0045121(membrane raft);GO:0031982(vesicle);GO:0016021(integral component of membrane);GO:0016020(membrane);GO:0005887(integral component of plasma membrane);GO:0005856(cytoskeleton);GO:0005829(cytosol);GO:0005783(endoplasmic reticulum);GO:0005739(mitochondrion);GO:0005737(cytoplasm);GO…	NA	NA	NA	stomatin [Source:HGNC Symbol;Acc:HGNC:3383]	MSTRG.28976.1	MSTRG.28976	.	yes	novel	trans	NA	-44.34	0.99006
ENSSSCT00000006067	0	chr1	293510864	293528679	MSTRG.2802	STOM	yes	GO:0072562(blood microparticle);GO:0070062(extracellular exosome);GO:0048471(perinuclear region of cytoplasm);GO:0045121(membrane raft);GO:0031982(vesicle);GO:0016021(integral component of membrane);GO:0016020(membrane);GO:0005887(integral component of plasma membrane);GO:0005856(cytoskeleton);GO:0005829(cytosol);GO:0005783(endoplasmic reticulum);GO:0005739(mitochondrion);GO:0005737(cytoplasm);GO…	NA	NA	NA	stomatin [Source:HGNC Symbol;Acc:HGNC:3383]	MSTRG.29455.1	MSTRG.29455	ENSSSCG00000002451	yes	novel	trans	NA	-42.97	0.963833
ENSSSCT00000006067	0	chr1	293510864	293528679	MSTRG.2802	STOM	yes	GO:0072562(blood microparticle);GO:0070062(extracellular exosome);GO:0048471(perinuclear region of cytoplasm);GO:0045121(membrane raft);GO:0031982(vesicle);GO:0016021(integral component of membrane);GO:0016020(membrane);GO:0005887(integral component of plasma membrane);GO:0005856(cytoskeleton);GO:0005829(cytosol);GO:0005783(endoplasmic reticulum);GO:0005739(mitochondrion);GO:0005737(cytoplasm);GO…	NA	NA	NA	stomatin [Source:HGNC Symbol;Acc:HGNC:3383]	MSTRG.30173.1	MSTRG.30173	CXCL2	yes	novel	trans	NA	-54.96	0.984394
ENSSSCT00000006067	0	chr1	293510864	293528679	MSTRG.2802	STOM	yes	GO:0072562(blood microparticle);GO:0070062(extracellular exosome);GO:0048471(perinuclear region of cytoplasm);GO:0045121(membrane raft);GO:0031982(vesicle);GO:0016021(integral component of membrane);GO:0016020(membrane);GO:0005887(integral component of plasma membrane);GO:0005856(cytoskeleton);GO:0005829(cytosol);GO:0005783(endoplasmic reticulum);GO:0005739(mitochondrion);GO:0005737(cytoplasm);GO…	NA	NA	NA	stomatin [Source:HGNC Symbol;Acc:HGNC:3383]	MSTRG.30360.1	MSTRG.30360	.	yes	novel	trans	NA	-44.18	0.971966
ENSSSCT00000006067	0	chr1	293510864	293528679	MSTRG.2802	STOM	yes	GO:0072562(blood microparticle);GO:0070062(extracellular exosome);GO:0048471(perinuclear region of cytoplasm);GO:0045121(membrane raft);GO:0031982(vesicle);GO:0016021(integral component of membrane);GO:0016020(membrane);GO:0005887(integral component of plasma membrane);GO:0005856(cytoskeleton);GO:0005829(cytosol);GO:0005783(endoplasmic reticulum);GO:0005739(mitochondrion);GO:0005737(cytoplasm);GO…	NA	NA	NA	stomatin [Source:HGNC Symbol;Acc:HGNC:3383]	MSTRG.30732.1	MSTRG.30732	.	yes	novel	trans	NA	-32.21	0.972836
ENSSSCT00000006067	0	chr1	293510864	293528679	MSTRG.2802	STOM	yes	GO:0072562(blood microparticle);GO:0070062(extracellular exosome);GO:0048471(perinuclear region of cytoplasm);GO:0045121(membrane raft);GO:0031982(vesicle);GO:0016021(integral component of membrane);GO:0016020(membrane);GO:0005887(integral component of plasma membrane);GO:0005856(cytoskeleton);GO:0005829(cytosol);GO:0005783(endoplasmic reticulum);GO:0005739(mitochondrion);GO:0005737(cytoplasm);GO…	NA	NA	NA	stomatin [Source:HGNC Symbol;Acc:HGNC:3383]	MSTRG.31692.1	MSTRG.31692	.	yes	novel	trans	NA	-44.10	0.96013
ENSSSCT00000006067	0	chr1	293510864	293528679	MSTRG.2802	STOM	yes	GO:0072562(blood microparticle);GO:0070062(extracellular exosome);GO:0048471(perinuclear region of cytoplasm);GO:0045121(membrane raft);GO:0031982(vesicle);GO:0016021(integral component of membrane);GO:0016020(membrane);GO:0005887(integral component of plasma membrane);GO:0005856(cytoskeleton);GO:0005829(cytosol);GO:0005783(endoplasmic reticulum);GO:0005739(mitochondrion);GO:0005737(cytoplasm);GO…	NA	NA	NA	stomatin [Source:HGNC Symbol;Acc:HGNC:3383]	MSTRG.31992.1	MSTRG.31992	.	yes	novel	trans	NA	-52.06	0.971339
ENSSSCT00000006159	0	chr1	299754095	299758545	MSTRG.2925	HSPA5	yes	GO:0070062(extracellular exosome);GO:0043209(myelin sheath);GO:0034663(endoplasmic reticulum chaperone complex);GO:0031012(extracellular matrix);GO:0030496(midbody);GO:0030176(integral component of endoplasmic reticulum membrane);GO:0016020(membrane);GO:0009986(cell surface);GO:0008180(COP9 signalosome);GO:0005925(focal adhesion);GO:0005886(plasma membrane);GO:0005793(endoplasmic reticulum-Golgi …	03060(Protein export);04141(Protein processing in endoplasmic reticulum);04918(Thyroid hormone synthesis);05020(Prion diseases)	K09490	NA	heat shock protein family A (Hsp70) member 5 [Source:HGNC Symbol;Acc:HGNC:5238]	MSTRG.4146.1	MSTRG.4146	.	yes	novel	trans	NA	-36.73	0.979612
ENSSSCT00000006159	0	chr1	299754095	299758545	MSTRG.2925	HSPA5	yes	GO:0070062(extracellular exosome);GO:0043209(myelin sheath);GO:0034663(endoplasmic reticulum chaperone complex);GO:0031012(extracellular matrix);GO:0030496(midbody);GO:0030176(integral component of endoplasmic reticulum membrane);GO:0016020(membrane);GO:0009986(cell surface);GO:0008180(COP9 signalosome);GO:0005925(focal adhesion);GO:0005886(plasma membrane);GO:0005793(endoplasmic reticulum-Golgi …	03060(Protein export);04141(Protein processing in endoplasmic reticulum);04918(Thyroid hormone synthesis);05020(Prion diseases)	K09490	NA	heat shock protein family A (Hsp70) member 5 [Source:HGNC Symbol;Acc:HGNC:5238]	MSTRG.6301.1	MSTRG.6301	.	yes	novel	trans	NA	-42.29	0.996352
ENSSSCT00000006159	0	chr1	299754095	299758545	MSTRG.2925	HSPA5	yes	GO:0070062(extracellular exosome);GO:0043209(myelin sheath);GO:0034663(endoplasmic reticulum chaperone complex);GO:0031012(extracellular matrix);GO:0030496(midbody);GO:0030176(integral component of endoplasmic reticulum membrane);GO:0016020(membrane);GO:0009986(cell surface);GO:0008180(COP9 signalosome);GO:0005925(focal adhesion);GO:0005886(plasma membrane);GO:0005793(endoplasmic reticulum-Golgi …	03060(Protein export);04141(Protein processing in endoplasmic reticulum);04918(Thyroid hormone synthesis);05020(Prion diseases)	K09490	NA	heat shock protein family A (Hsp70) member 5 [Source:HGNC Symbol;Acc:HGNC:5238]	MSTRG.6500.1	MSTRG.6500	.	yes	novel	trans	NA	-35.25	0.96024
ENSSSCT00000006159	0	chr1	299754095	299758545	MSTRG.2925	HSPA5	yes	GO:0070062(extracellular exosome);GO:0043209(myelin sheath);GO:0034663(endoplasmic reticulum chaperone complex);GO:0031012(extracellular matrix);GO:0030496(midbody);GO:0030176(integral component of endoplasmic reticulum membrane);GO:0016020(membrane);GO:0009986(cell surface);GO:0008180(COP9 signalosome);GO:0005925(focal adhesion);GO:0005886(plasma membrane);GO:0005793(endoplasmic reticulum-Golgi …	03060(Protein export);04141(Protein processing in endoplasmic reticulum);04918(Thyroid hormone synthesis);05020(Prion diseases)	K09490	NA	heat shock protein family A (Hsp70) member 5 [Source:HGNC Symbol;Acc:HGNC:5238]	MSTRG.8882.1	MSTRG.8882	.	yes	novel	trans	NA	-29.31	-0.952418
ENSSSCT00000006159	0	chr1	299754095	299758545	MSTRG.2925	HSPA5	yes	GO:0070062(extracellular exosome);GO:0043209(myelin sheath);GO:0034663(endoplasmic reticulum chaperone complex);GO:0031012(extracellular matrix);GO:0030496(midbody);GO:0030176(integral component of endoplasmic reticulum membrane);GO:0016020(membrane);GO:0009986(cell surface);GO:0008180(COP9 signalosome);GO:0005925(focal adhesion);GO:0005886(plasma membrane);GO:0005793(endoplasmic reticulum-Golgi …	03060(Protein export);04141(Protein processing in endoplasmic reticulum);04918(Thyroid hormone synthesis);05020(Prion diseases)	K09490	NA	heat shock protein family A (Hsp70) member 5 [Source:HGNC Symbol;Acc:HGNC:5238]	MSTRG.10360.1	MSTRG.10360	.	yes	novel	trans	NA	-35.32	0.987697
ENSSSCT00000006159	0	chr1	299754095	299758545	MSTRG.2925	HSPA5	yes	GO:0070062(extracellular exosome);GO:0043209(myelin sheath);GO:0034663(endoplasmic reticulum chaperone complex);GO:0031012(extracellular matrix);GO:0030496(midbody);GO:0030176(integral component of endoplasmic reticulum membrane);GO:0016020(membrane);GO:0009986(cell surface);GO:0008180(COP9 signalosome);GO:0005925(focal adhesion);GO:0005886(plasma membrane);GO:0005793(endoplasmic reticulum-Golgi …	03060(Protein export);04141(Protein processing in endoplasmic reticulum);04918(Thyroid hormone synthesis);05020(Prion diseases)	K09490	NA	heat shock protein family A (Hsp70) member 5 [Source:HGNC Symbol;Acc:HGNC:5238]	MSTRG.11036.1	MSTRG.11036	.	yes	novel	trans	NA	-27.85	0.995804
ENSSSCT00000006159	0	chr1	299754095	299758545	MSTRG.2925	HSPA5	yes	GO:0070062(extracellular exosome);GO:0043209(myelin sheath);GO:0034663(endoplasmic reticulum chaperone complex);GO:0031012(extracellular matrix);GO:0030496(midbody);GO:0030176(integral component of endoplasmic reticulum membrane);GO:0016020(membrane);GO:0009986(cell surface);GO:0008180(COP9 signalosome);GO:0005925(focal adhesion);GO:0005886(plasma membrane);GO:0005793(endoplasmic reticulum-Golgi …	03060(Protein export);04141(Protein processing in endoplasmic reticulum);04918(Thyroid hormone synthesis);05020(Prion diseases)	K09490	NA	heat shock protein family A (Hsp70) member 5 [Source:HGNC Symbol;Acc:HGNC:5238]	MSTRG.11081.1	MSTRG.11081	.	yes	novel	trans	NA	-53.63	-0.970182
ENSSSCT00000006159	0	chr1	299754095	299758545	MSTRG.2925	HSPA5	yes	GO:0070062(extracellular exosome);GO:0043209(myelin sheath);GO:0034663(endoplasmic reticulum chaperone complex);GO:0031012(extracellular matrix);GO:0030496(midbody);GO:0030176(integral component of endoplasmic reticulum membrane);GO:0016020(membrane);GO:0009986(cell surface);GO:0008180(COP9 signalosome);GO:0005925(focal adhesion);GO:0005886(plasma membrane);GO:0005793(endoplasmic reticulum-Golgi …	03060(Protein export);04141(Protein processing in endoplasmic reticulum);04918(Thyroid hormone synthesis);05020(Prion diseases)	K09490	NA	heat shock protein family A (Hsp70) member 5 [Source:HGNC Symbol;Acc:HGNC:5238]	MSTRG.12278.1	MSTRG.12278	U6	yes	novel	trans	NA	-28.64	0.965697
ENSSSCT00000006159	0	chr1	299754095	299758545	MSTRG.2925	HSPA5	yes	GO:0070062(extracellular exosome);GO:0043209(myelin sheath);GO:0034663(endoplasmic reticulum chaperone complex);GO:0031012(extracellular matrix);GO:0030496(midbody);GO:0030176(integral component of endoplasmic reticulum membrane);GO:0016020(membrane);GO:0009986(cell surface);GO:0008180(COP9 signalosome);GO:0005925(focal adhesion);GO:0005886(plasma membrane);GO:0005793(endoplasmic reticulum-Golgi …	03060(Protein export);04141(Protein processing in endoplasmic reticulum);04918(Thyroid hormone synthesis);05020(Prion diseases)	K09490	NA	heat shock protein family A (Hsp70) member 5 [Source:HGNC Symbol;Acc:HGNC:5238]	MSTRG.13663.1	MSTRG.13663	.	yes	novel	trans	NA	-35.44	0.967738
ENSSSCT00000006159	0	chr1	299754095	299758545	MSTRG.2925	HSPA5	yes	GO:0070062(extracellular exosome);GO:0043209(myelin sheath);GO:0034663(endoplasmic reticulum chaperone complex);GO:0031012(extracellular matrix);GO:0030496(midbody);GO:0030176(integral component of endoplasmic reticulum membrane);GO:0016020(membrane);GO:0009986(cell surface);GO:0008180(COP9 signalosome);GO:0005925(focal adhesion);GO:0005886(plasma membrane);GO:0005793(endoplasmic reticulum-Golgi …	03060(Protein export);04141(Protein processing in endoplasmic reticulum);04918(Thyroid hormone synthesis);05020(Prion diseases)	K09490	NA	heat shock protein family A (Hsp70) member 5 [Source:HGNC Symbol;Acc:HGNC:5238]	MSTRG.14046.1	MSTRG.14046	.	yes	novel	trans	NA	-32.03	0.965207
ENSSSCT00000006159	0	chr1	299754095	299758545	MSTRG.2925	HSPA5	yes	GO:0070062(extracellular exosome);GO:0043209(myelin sheath);GO:0034663(endoplasmic reticulum chaperone complex);GO:0031012(extracellular matrix);GO:0030496(midbody);GO:0030176(integral component of endoplasmic reticulum membrane);GO:0016020(membrane);GO:0009986(cell surface);GO:0008180(COP9 signalosome);GO:0005925(focal adhesion);GO:0005886(plasma membrane);GO:0005793(endoplasmic reticulum-Golgi …	03060(Protein export);04141(Protein processing in endoplasmic reticulum);04918(Thyroid hormone synthesis);05020(Prion diseases)	K09490	NA	heat shock protein family A (Hsp70) member 5 [Source:HGNC Symbol;Acc:HGNC:5238]	MSTRG.14254.1	MSTRG.14254	.	yes	novel	trans	NA	-26.60	0.969547
ENSSSCT00000006159	0	chr1	299754095	299758545	MSTRG.2925	HSPA5	yes	GO:0070062(extracellular exosome);GO:0043209(myelin sheath);GO:0034663(endoplasmic reticulum chaperone complex);GO:0031012(extracellular matrix);GO:0030496(midbody);GO:0030176(integral component of endoplasmic reticulum membrane);GO:0016020(membrane);GO:0009986(cell surface);GO:0008180(COP9 signalosome);GO:0005925(focal adhesion);GO:0005886(plasma membrane);GO:0005793(endoplasmic reticulum-Golgi …	03060(Protein export);04141(Protein processing in endoplasmic reticulum);04918(Thyroid hormone synthesis);05020(Prion diseases)	K09490	NA	heat shock protein family A (Hsp70) member 5 [Source:HGNC Symbol;Acc:HGNC:5238]	MSTRG.15900.1	MSTRG.15900	.	yes	novel	trans	NA	-42.30	0.96999
ENSSSCT00000006159	0	chr1	299754095	299758545	MSTRG.2925	HSPA5	yes	GO:0070062(extracellular exosome);GO:0043209(myelin sheath);GO:0034663(endoplasmic reticulum chaperone complex);GO:0031012(extracellular matrix);GO:0030496(midbody);GO:0030176(integral component of endoplasmic reticulum membrane);GO:0016020(membrane);GO:0009986(cell surface);GO:0008180(COP9 signalosome);GO:0005925(focal adhesion);GO:0005886(plasma membrane);GO:0005793(endoplasmic reticulum-Golgi …	03060(Protein export);04141(Protein processing in endoplasmic reticulum);04918(Thyroid hormone synthesis);05020(Prion diseases)	K09490	NA	heat shock protein family A (Hsp70) member 5 [Source:HGNC Symbol;Acc:HGNC:5238]	MSTRG.16154.1	MSTRG.16154	.	yes	novel	trans	NA	-31.48	0.970966
ENSSSCT00000006159	0	chr1	299754095	299758545	MSTRG.2925	HSPA5	yes	GO:0070062(extracellular exosome);GO:0043209(myelin sheath);GO:0034663(endoplasmic reticulum chaperone complex);GO:0031012(extracellular matrix);GO:0030496(midbody);GO:0030176(integral component of endoplasmic reticulum membrane);GO:0016020(membrane);GO:0009986(cell surface);GO:0008180(COP9 signalosome);GO:0005925(focal adhesion);GO:0005886(plasma membrane);GO:0005793(endoplasmic reticulum-Golgi …	03060(Protein export);04141(Protein processing in endoplasmic reticulum);04918(Thyroid hormone synthesis);05020(Prion diseases)	K09490	NA	heat shock protein family A (Hsp70) member 5 [Source:HGNC Symbol;Acc:HGNC:5238]	MSTRG.16956.1	MSTRG.16956	.	yes	novel	trans	NA	-45.18	0.950594
ENSSSCT00000006159	0	chr1	299754095	299758545	MSTRG.2925	HSPA5	yes	GO:0070062(extracellular exosome);GO:0043209(myelin sheath);GO:0034663(endoplasmic reticulum chaperone complex);GO:0031012(extracellular matrix);GO:0030496(midbody);GO:0030176(integral component of endoplasmic reticulum membrane);GO:0016020(membrane);GO:0009986(cell surface);GO:0008180(COP9 signalosome);GO:0005925(focal adhesion);GO:0005886(plasma membrane);GO:0005793(endoplasmic reticulum-Golgi …	03060(Protein export);04141(Protein processing in endoplasmic reticulum);04918(Thyroid hormone synthesis);05020(Prion diseases)	K09490	NA	heat shock protein family A (Hsp70) member 5 [Source:HGNC Symbol;Acc:HGNC:5238]	MSTRG.17629.1	MSTRG.17629	.	yes	novel	trans	NA	-35.62	0.967391
ENSSSCT00000006159	0	chr1	299754095	299758545	MSTRG.2925	HSPA5	yes	GO:0070062(extracellular exosome);GO:0043209(myelin sheath);GO:0034663(endoplasmic reticulum chaperone complex);GO:0031012(extracellular matrix);GO:0030496(midbody);GO:0030176(integral component of endoplasmic reticulum membrane);GO:0016020(membrane);GO:0009986(cell surface);GO:0008180(COP9 signalosome);GO:0005925(focal adhesion);GO:0005886(plasma membrane);GO:0005793(endoplasmic reticulum-Golgi …	03060(Protein export);04141(Protein processing in endoplasmic reticulum);04918(Thyroid hormone synthesis);05020(Prion diseases)	K09490	NA	heat shock protein family A (Hsp70) member 5 [Source:HGNC Symbol;Acc:HGNC:5238]	MSTRG.19205.1	MSTRG.19205	.	yes	novel	trans	NA	-23.57	0.951998
ENSSSCT00000006159	0	chr1	299754095	299758545	MSTRG.2925	HSPA5	yes	GO:0070062(extracellular exosome);GO:0043209(myelin sheath);GO:0034663(endoplasmic reticulum chaperone complex);GO:0031012(extracellular matrix);GO:0030496(midbody);GO:0030176(integral component of endoplasmic reticulum membrane);GO:0016020(membrane);GO:0009986(cell surface);GO:0008180(COP9 signalosome);GO:0005925(focal adhesion);GO:0005886(plasma membrane);GO:0005793(endoplasmic reticulum-Golgi …	03060(Protein export);04141(Protein processing in endoplasmic reticulum);04918(Thyroid hormone synthesis);05020(Prion diseases)	K09490	NA	heat shock protein family A (Hsp70) member 5 [Source:HGNC Symbol;Acc:HGNC:5238]	MSTRG.21582.1	MSTRG.21582	.	yes	novel	trans	NA	-35.91	0.964765
ENSSSCT00000006159	0	chr1	299754095	299758545	MSTRG.2925	HSPA5	yes	GO:0070062(extracellular exosome);GO:0043209(myelin sheath);GO:0034663(endoplasmic reticulum chaperone complex);GO:0031012(extracellular matrix);GO:0030496(midbody);GO:0030176(integral component of endoplasmic reticulum membrane);GO:0016020(membrane);GO:0009986(cell surface);GO:0008180(COP9 signalosome);GO:0005925(focal adhesion);GO:0005886(plasma membrane);GO:0005793(endoplasmic reticulum-Golgi …	03060(Protein export);04141(Protein processing in endoplasmic reticulum);04918(Thyroid hormone synthesis);05020(Prion diseases)	K09490	NA	heat shock protein family A (Hsp70) member 5 [Source:HGNC Symbol;Acc:HGNC:5238]	MSTRG.22503.1	MSTRG.22503	CIART	yes	novel	trans	NA	-21.51	0.990578
ENSSSCT00000006159	0	chr1	299754095	299758545	MSTRG.2925	HSPA5	yes	GO:0070062(extracellular exosome);GO:0043209(myelin sheath);GO:0034663(endoplasmic reticulum chaperone complex);GO:0031012(extracellular matrix);GO:0030496(midbody);GO:0030176(integral component of endoplasmic reticulum membrane);GO:0016020(membrane);GO:0009986(cell surface);GO:0008180(COP9 signalosome);GO:0005925(focal adhesion);GO:0005886(plasma membrane);GO:0005793(endoplasmic reticulum-Golgi …	03060(Protein export);04141(Protein processing in endoplasmic reticulum);04918(Thyroid hormone synthesis);05020(Prion diseases)	K09490	NA	heat shock protein family A (Hsp70) member 5 [Source:HGNC Symbol;Acc:HGNC:5238]	MSTRG.24277.1	MSTRG.24277	.	yes	novel	trans	NA	-28.86	0.979724
ENSSSCT00000006159	0	chr1	299754095	299758545	MSTRG.2925	HSPA5	yes	GO:0070062(extracellular exosome);GO:0043209(myelin sheath);GO:0034663(endoplasmic reticulum chaperone complex);GO:0031012(extracellular matrix);GO:0030496(midbody);GO:0030176(integral component of endoplasmic reticulum membrane);GO:0016020(membrane);GO:0009986(cell surface);GO:0008180(COP9 signalosome);GO:0005925(focal adhesion);GO:0005886(plasma membrane);GO:0005793(endoplasmic reticulum-Golgi …	03060(Protein export);04141(Protein processing in endoplasmic reticulum);04918(Thyroid hormone synthesis);05020(Prion diseases)	K09490	NA	heat shock protein family A (Hsp70) member 5 [Source:HGNC Symbol;Acc:HGNC:5238]	MSTRG.25871.1	MSTRG.25871	PIH1D1	yes	novel	trans	NA	-33.40	0.971545
ENSSSCT00000006159	0	chr1	299754095	299758545	MSTRG.2925	HSPA5	yes	GO:0070062(extracellular exosome);GO:0043209(myelin sheath);GO:0034663(endoplasmic reticulum chaperone complex);GO:0031012(extracellular matrix);GO:0030496(midbody);GO:0030176(integral component of endoplasmic reticulum membrane);GO:0016020(membrane);GO:0009986(cell surface);GO:0008180(COP9 signalosome);GO:0005925(focal adhesion);GO:0005886(plasma membrane);GO:0005793(endoplasmic reticulum-Golgi …	03060(Protein export);04141(Protein processing in endoplasmic reticulum);04918(Thyroid hormone synthesis);05020(Prion diseases)	K09490	NA	heat shock protein family A (Hsp70) member 5 [Source:HGNC Symbol;Acc:HGNC:5238]	MSTRG.26444.1	MSTRG.26444	.	yes	novel	trans	NA	-28.30	0.995015
ENSSSCT00000006159	0	chr1	299754095	299758545	MSTRG.2925	HSPA5	yes	GO:0070062(extracellular exosome);GO:0043209(myelin sheath);GO:0034663(endoplasmic reticulum chaperone complex);GO:0031012(extracellular matrix);GO:0030496(midbody);GO:0030176(integral component of endoplasmic reticulum membrane);GO:0016020(membrane);GO:0009986(cell surface);GO:0008180(COP9 signalosome);GO:0005925(focal adhesion);GO:0005886(plasma membrane);GO:0005793(endoplasmic reticulum-Golgi …	03060(Protein export);04141(Protein processing in endoplasmic reticulum);04918(Thyroid hormone synthesis);05020(Prion diseases)	K09490	NA	heat shock protein family A (Hsp70) member 5 [Source:HGNC Symbol;Acc:HGNC:5238]	MSTRG.26729.1	MSTRG.26729	.	yes	novel	trans	NA	-35.81	0.96551
ENSSSCT00000006159	0	chr1	299754095	299758545	MSTRG.2925	HSPA5	yes	GO:0070062(extracellular exosome);GO:0043209(myelin sheath);GO:0034663(endoplasmic reticulum chaperone complex);GO:0031012(extracellular matrix);GO:0030496(midbody);GO:0030176(integral component of endoplasmic reticulum membrane);GO:0016020(membrane);GO:0009986(cell surface);GO:0008180(COP9 signalosome);GO:0005925(focal adhesion);GO:0005886(plasma membrane);GO:0005793(endoplasmic reticulum-Golgi …	03060(Protein export);04141(Protein processing in endoplasmic reticulum);04918(Thyroid hormone synthesis);05020(Prion diseases)	K09490	NA	heat shock protein family A (Hsp70) member 5 [Source:HGNC Symbol;Acc:HGNC:5238]	MSTRG.26758.1	MSTRG.26758	ENSSSCG00000027352	yes	novel	trans	NA	-34.76	0.981909
ENSSSCT00000006159	0	chr1	299754095	299758545	MSTRG.2925	HSPA5	yes	GO:0070062(extracellular exosome);GO:0043209(myelin sheath);GO:0034663(endoplasmic reticulum chaperone complex);GO:0031012(extracellular matrix);GO:0030496(midbody);GO:0030176(integral component of endoplasmic reticulum membrane);GO:0016020(membrane);GO:0009986(cell surface);GO:0008180(COP9 signalosome);GO:0005925(focal adhesion);GO:0005886(plasma membrane);GO:0005793(endoplasmic reticulum-Golgi …	03060(Protein export);04141(Protein processing in endoplasmic reticulum);04918(Thyroid hormone synthesis);05020(Prion diseases)	K09490	NA	heat shock protein family A (Hsp70) member 5 [Source:HGNC Symbol;Acc:HGNC:5238]	MSTRG.27711.1	MSTRG.27711	.	yes	novel	trans	NA	-42.16	-0.975163
ENSSSCT00000006159	0	chr1	299754095	299758545	MSTRG.2925	HSPA5	yes	GO:0070062(extracellular exosome);GO:0043209(myelin sheath);GO:0034663(endoplasmic reticulum chaperone complex);GO:0031012(extracellular matrix);GO:0030496(midbody);GO:0030176(integral component of endoplasmic reticulum membrane);GO:0016020(membrane);GO:0009986(cell surface);GO:0008180(COP9 signalosome);GO:0005925(focal adhesion);GO:0005886(plasma membrane);GO:0005793(endoplasmic reticulum-Golgi …	03060(Protein export);04141(Protein processing in endoplasmic reticulum);04918(Thyroid hormone synthesis);05020(Prion diseases)	K09490	NA	heat shock protein family A (Hsp70) member 5 [Source:HGNC Symbol;Acc:HGNC:5238]	MSTRG.28025.1	MSTRG.28025	.	yes	novel	trans	NA	-31.20	0.976848
ENSSSCT00000006159	0	chr1	299754095	299758545	MSTRG.2925	HSPA5	yes	GO:0070062(extracellular exosome);GO:0043209(myelin sheath);GO:0034663(endoplasmic reticulum chaperone complex);GO:0031012(extracellular matrix);GO:0030496(midbody);GO:0030176(integral component of endoplasmic reticulum membrane);GO:0016020(membrane);GO:0009986(cell surface);GO:0008180(COP9 signalosome);GO:0005925(focal adhesion);GO:0005886(plasma membrane);GO:0005793(endoplasmic reticulum-Golgi …	03060(Protein export);04141(Protein processing in endoplasmic reticulum);04918(Thyroid hormone synthesis);05020(Prion diseases)	K09490	NA	heat shock protein family A (Hsp70) member 5 [Source:HGNC Symbol;Acc:HGNC:5238]	MSTRG.28976.1	MSTRG.28976	.	yes	novel	trans	NA	-35.59	0.97257
ENSSSCT00000006159	0	chr1	299754095	299758545	MSTRG.2925	HSPA5	yes	GO:0070062(extracellular exosome);GO:0043209(myelin sheath);GO:0034663(endoplasmic reticulum chaperone complex);GO:0031012(extracellular matrix);GO:0030496(midbody);GO:0030176(integral component of endoplasmic reticulum membrane);GO:0016020(membrane);GO:0009986(cell surface);GO:0008180(COP9 signalosome);GO:0005925(focal adhesion);GO:0005886(plasma membrane);GO:0005793(endoplasmic reticulum-Golgi …	03060(Protein export);04141(Protein processing in endoplasmic reticulum);04918(Thyroid hormone synthesis);05020(Prion diseases)	K09490	NA	heat shock protein family A (Hsp70) member 5 [Source:HGNC Symbol;Acc:HGNC:5238]	MSTRG.29455.1	MSTRG.29455	ENSSSCG00000002451	yes	novel	trans	NA	-50.97	0.969162
ENSSSCT00000006159	0	chr1	299754095	299758545	MSTRG.2925	HSPA5	yes	GO:0070062(extracellular exosome);GO:0043209(myelin sheath);GO:0034663(endoplasmic reticulum chaperone complex);GO:0031012(extracellular matrix);GO:0030496(midbody);GO:0030176(integral component of endoplasmic reticulum membrane);GO:0016020(membrane);GO:0009986(cell surface);GO:0008180(COP9 signalosome);GO:0005925(focal adhesion);GO:0005886(plasma membrane);GO:0005793(endoplasmic reticulum-Golgi …	03060(Protein export);04141(Protein processing in endoplasmic reticulum);04918(Thyroid hormone synthesis);05020(Prion diseases)	K09490	NA	heat shock protein family A (Hsp70) member 5 [Source:HGNC Symbol;Acc:HGNC:5238]	MSTRG.30173.1	MSTRG.30173	CXCL2	yes	novel	trans	NA	-36.55	0.969551
ENSSSCT00000006159	0	chr1	299754095	299758545	MSTRG.2925	HSPA5	yes	GO:0070062(extracellular exosome);GO:0043209(myelin sheath);GO:0034663(endoplasmic reticulum chaperone complex);GO:0031012(extracellular matrix);GO:0030496(midbody);GO:0030176(integral component of endoplasmic reticulum membrane);GO:0016020(membrane);GO:0009986(cell surface);GO:0008180(COP9 signalosome);GO:0005925(focal adhesion);GO:0005886(plasma membrane);GO:0005793(endoplasmic reticulum-Golgi …	03060(Protein export);04141(Protein processing in endoplasmic reticulum);04918(Thyroid hormone synthesis);05020(Prion diseases)	K09490	NA	heat shock protein family A (Hsp70) member 5 [Source:HGNC Symbol;Acc:HGNC:5238]	MSTRG.30209.1	MSTRG.30209	.	yes	novel	trans	NA	-32.35	0.993201
ENSSSCT00000006159	0	chr1	299754095	299758545	MSTRG.2925	HSPA5	yes	GO:0070062(extracellular exosome);GO:0043209(myelin sheath);GO:0034663(endoplasmic reticulum chaperone complex);GO:0031012(extracellular matrix);GO:0030496(midbody);GO:0030176(integral component of endoplasmic reticulum membrane);GO:0016020(membrane);GO:0009986(cell surface);GO:0008180(COP9 signalosome);GO:0005925(focal adhesion);GO:0005886(plasma membrane);GO:0005793(endoplasmic reticulum-Golgi …	03060(Protein export);04141(Protein processing in endoplasmic reticulum);04918(Thyroid hormone synthesis);05020(Prion diseases)	K09490	NA	heat shock protein family A (Hsp70) member 5 [Source:HGNC Symbol;Acc:HGNC:5238]	MSTRG.30732.1	MSTRG.30732	.	yes	novel	trans	NA	-42.22	0.987924
ENSSSCT00000020953	0	chr1	299756995	299757130	MSTRG.2926	SNORA21	yes	NA	NA	NA	NA	Small nucleolar RNA SNORA21 [Source:RFAM;Acc:RF00412]	MSTRG.4146.1	MSTRG.4146	.	yes	novel	trans	NA	-22.96	0.976219
ENSSSCT00000020953	0	chr1	299756995	299757130	MSTRG.2926	SNORA21	yes	NA	NA	NA	NA	Small nucleolar RNA SNORA21 [Source:RFAM;Acc:RF00412]	MSTRG.6301.1	MSTRG.6301	.	yes	novel	trans	NA	-15.21	0.972243
ENSSSCT00000020953	0	chr1	299756995	299757130	MSTRG.2926	SNORA21	yes	NA	NA	NA	NA	Small nucleolar RNA SNORA21 [Source:RFAM;Acc:RF00412]	MSTRG.10360.1	MSTRG.10360	.	yes	novel	trans	NA	-34.51	0.954689
ENSSSCT00000020953	0	chr1	299756995	299757130	MSTRG.2926	SNORA21	yes	NA	NA	NA	NA	Small nucleolar RNA SNORA21 [Source:RFAM;Acc:RF00412]	MSTRG.11036.1	MSTRG.11036	.	yes	novel	trans	NA	-12.36	0.984488
ENSSSCT00000020953	0	chr1	299756995	299757130	MSTRG.2926	SNORA21	yes	NA	NA	NA	NA	Small nucleolar RNA SNORA21 [Source:RFAM;Acc:RF00412]	MSTRG.11230.1	MSTRG.11230	.	yes	novel	trans	NA	-14.26	0.966758
ENSSSCT00000020953	0	chr1	299756995	299757130	MSTRG.2926	SNORA21	yes	NA	NA	NA	NA	Small nucleolar RNA SNORA21 [Source:RFAM;Acc:RF00412]	MSTRG.12000.1	MSTRG.12000	STEAP3	yes	novel	trans	NA	-34.51	0.958243
ENSSSCT00000020953	0	chr1	299756995	299757130	MSTRG.2926	SNORA21	yes	NA	NA	NA	NA	Small nucleolar RNA SNORA21 [Source:RFAM;Acc:RF00412]	MSTRG.12278.1	MSTRG.12278	U6	yes	novel	trans	NA	-35.85	0.984749
ENSSSCT00000020953	0	chr1	299756995	299757130	MSTRG.2926	SNORA21	yes	NA	NA	NA	NA	Small nucleolar RNA SNORA21 [Source:RFAM;Acc:RF00412]	MSTRG.12511.1	MSTRG.12511	.	yes	novel	trans	NA	-34.51	0.954378
ENSSSCT00000020953	0	chr1	299756995	299757130	MSTRG.2926	SNORA21	yes	NA	NA	NA	NA	Small nucleolar RNA SNORA21 [Source:RFAM;Acc:RF00412]	MSTRG.13663.1	MSTRG.13663	.	yes	novel	trans	NA	-19.86	0.962189
ENSSSCT00000020953	0	chr1	299756995	299757130	MSTRG.2926	SNORA21	yes	NA	NA	NA	NA	Small nucleolar RNA SNORA21 [Source:RFAM;Acc:RF00412]	MSTRG.16154.1	MSTRG.16154	.	yes	novel	trans	NA	-34.51	0.964081
ENSSSCT00000020953	0	chr1	299756995	299757130	MSTRG.2926	SNORA21	yes	NA	NA	NA	NA	Small nucleolar RNA SNORA21 [Source:RFAM;Acc:RF00412]	MSTRG.19205.1	MSTRG.19205	.	yes	novel	trans	NA	-22.96	0.986041
ENSSSCT00000020953	0	chr1	299756995	299757130	MSTRG.2926	SNORA21	yes	NA	NA	NA	NA	Small nucleolar RNA SNORA21 [Source:RFAM;Acc:RF00412]	MSTRG.19376.1	MSTRG.19376	.	yes	novel	trans	NA	-34.51	0.9867
ENSSSCT00000020953	0	chr1	299756995	299757130	MSTRG.2926	SNORA21	yes	NA	NA	NA	NA	Small nucleolar RNA SNORA21 [Source:RFAM;Acc:RF00412]	MSTRG.21063.1	MSTRG.21063	.	yes	novel	trans	NA	-11.76	0.950689
ENSSSCT00000020953	0	chr1	299756995	299757130	MSTRG.2926	SNORA21	yes	NA	NA	NA	NA	Small nucleolar RNA SNORA21 [Source:RFAM;Acc:RF00412]	MSTRG.21582.1	MSTRG.21582	.	yes	novel	trans	NA	-27.21	0.995166
ENSSSCT00000020953	0	chr1	299756995	299757130	MSTRG.2926	SNORA21	yes	NA	NA	NA	NA	Small nucleolar RNA SNORA21 [Source:RFAM;Acc:RF00412]	MSTRG.22503.1	MSTRG.22503	CIART	yes	novel	trans	NA	-29.50	0.990171
ENSSSCT00000020953	0	chr1	299756995	299757130	MSTRG.2926	SNORA21	yes	NA	NA	NA	NA	Small nucleolar RNA SNORA21 [Source:RFAM;Acc:RF00412]	MSTRG.24850.1	MSTRG.24850	.	yes	novel	trans	NA	-33.11	0.968667
ENSSSCT00000020953	0	chr1	299756995	299757130	MSTRG.2926	SNORA21	yes	NA	NA	NA	NA	Small nucleolar RNA SNORA21 [Source:RFAM;Acc:RF00412]	MSTRG.25871.1	MSTRG.25871	PIH1D1	yes	novel	trans	NA	-20.56	0.980415
ENSSSCT00000020953	0	chr1	299756995	299757130	MSTRG.2926	SNORA21	yes	NA	NA	NA	NA	Small nucleolar RNA SNORA21 [Source:RFAM;Acc:RF00412]	MSTRG.26444.1	MSTRG.26444	.	yes	novel	trans	NA	-17.01	0.989677
ENSSSCT00000020953	0	chr1	299756995	299757130	MSTRG.2926	SNORA21	yes	NA	NA	NA	NA	Small nucleolar RNA SNORA21 [Source:RFAM;Acc:RF00412]	MSTRG.26729.1	MSTRG.26729	.	yes	novel	trans	NA	-22.96	0.980572
ENSSSCT00000020953	0	chr1	299756995	299757130	MSTRG.2926	SNORA21	yes	NA	NA	NA	NA	Small nucleolar RNA SNORA21 [Source:RFAM;Acc:RF00412]	MSTRG.27618.1	MSTRG.27618	.	yes	novel	trans	NA	-30.55	0.954008
ENSSSCT00000020953	0	chr1	299756995	299757130	MSTRG.2926	SNORA21	yes	NA	NA	NA	NA	Small nucleolar RNA SNORA21 [Source:RFAM;Acc:RF00412]	MSTRG.28025.1	MSTRG.28025	.	yes	novel	trans	NA	-34.51	0.962545
ENSSSCT00000020953	0	chr1	299756995	299757130	MSTRG.2926	SNORA21	yes	NA	NA	NA	NA	Small nucleolar RNA SNORA21 [Source:RFAM;Acc:RF00412]	MSTRG.29455.1	MSTRG.29455	ENSSSCG00000002451	yes	novel	trans	NA	-29.04	0.95054
ENSSSCT00000020953	0	chr1	299756995	299757130	MSTRG.2926	SNORA21	yes	NA	NA	NA	NA	Small nucleolar RNA SNORA21 [Source:RFAM;Acc:RF00412]	MSTRG.30209.1	MSTRG.30209	.	yes	novel	trans	NA	-43.09	0.997304
ENSSSCT00000020953	0	chr1	299756995	299757130	MSTRG.2926	SNORA21	yes	NA	NA	NA	NA	Small nucleolar RNA SNORA21 [Source:RFAM;Acc:RF00412]	MSTRG.30732.1	MSTRG.30732	.	yes	novel	trans	NA	-14.61	0.972807
ENSSSCT00000020175	0	chr1	301872754	301872883	MSTRG.2969	SNORA65	yes	NA	NA	NA	NA	Small nucleolar RNA SNORA65 [Source:RFAM;Acc:RF00302]	MSTRG.5484.1	MSTRG.5484	.	yes	novel	trans	NA	-47.31	0.977322
ENSSSCT00000020175	0	chr1	301872754	301872883	MSTRG.2969	SNORA65	yes	NA	NA	NA	NA	Small nucleolar RNA SNORA65 [Source:RFAM;Acc:RF00302]	MSTRG.10833.1	MSTRG.10833	.	yes	novel	trans	NA	-29.95	-0.951837
ENSSSCT00000020175	0	chr1	301872754	301872883	MSTRG.2969	SNORA65	yes	NA	NA	NA	NA	Small nucleolar RNA SNORA65 [Source:RFAM;Acc:RF00302]	MSTRG.18208.1	MSTRG.18208	.	yes	novel	trans	NA	-50.95	-0.958203
ENSSSCT00000020175	0	chr1	301872754	301872883	MSTRG.2969	SNORA65	yes	NA	NA	NA	NA	Small nucleolar RNA SNORA65 [Source:RFAM;Acc:RF00302]	MSTRG.20904.1	MSTRG.20904	.	yes	novel	trans	NA	-38.44	0.957684
ENSSSCT00000020175	0	chr1	301872754	301872883	MSTRG.2969	SNORA65	yes	NA	NA	NA	NA	Small nucleolar RNA SNORA65 [Source:RFAM;Acc:RF00302]	MSTRG.21416.1	MSTRG.21416	MTSS1	yes	novel	trans	NA	-32.10	0.962101
ENSSSCT00000020175	0	chr1	301872754	301872883	MSTRG.2969	SNORA65	yes	NA	NA	NA	NA	Small nucleolar RNA SNORA65 [Source:RFAM;Acc:RF00302]	MSTRG.21803.1	MSTRG.21803	.	yes	novel	trans	NA	-21.65	-0.964914
ENSSSCT00000020175	0	chr1	301872754	301872883	MSTRG.2969	SNORA65	yes	NA	NA	NA	NA	Small nucleolar RNA SNORA65 [Source:RFAM;Acc:RF00302]	MSTRG.25252.1	MSTRG.25252	.	yes	novel	trans	NA	-31.48	0.964494
ENSSSCT00000020175	0	chr1	301872754	301872883	MSTRG.2969	SNORA65	yes	NA	NA	NA	NA	Small nucleolar RNA SNORA65 [Source:RFAM;Acc:RF00302]	MSTRG.29060.1	MSTRG.29060	.	yes	novel	trans	NA	-15.86	0.973008
ENSSSCT00000020175	0	chr1	301872754	301872883	MSTRG.2969	SNORA65	yes	NA	NA	NA	NA	Small nucleolar RNA SNORA65 [Source:RFAM;Acc:RF00302]	MSTRG.29634.1	MSTRG.29634	.	yes	novel	trans	NA	-21.00	0.981388
ENSSSCT00000006200	0	chr1	302600679	302605199	MSTRG.2998	LCN2	yes	GO:0070062(extracellular exosome);GO:0005615(extracellular space);GO:0005576(extracellular region);GO:0097192(extrinsic apoptotic signaling pathway in absence of ligand);GO:0045087(innate immune response);GO:0015891(siderophore transport);GO:0009615(response to virus);GO:0006810(transport);GO:0036094(small molecule binding);GO:0005506(iron ion binding);GO:0005215(transporter activity)	NA	NA	NA	lipocalin 2 [Source:HGNC Symbol;Acc:HGNC:6526]	MSTRG.4592.1	MSTRG.4592	.	yes	novel	trans	NA	-33.83	0.983885
ENSSSCT00000006200	0	chr1	302600679	302605199	MSTRG.2998	LCN2	yes	GO:0070062(extracellular exosome);GO:0005615(extracellular space);GO:0005576(extracellular region);GO:0097192(extrinsic apoptotic signaling pathway in absence of ligand);GO:0045087(innate immune response);GO:0015891(siderophore transport);GO:0009615(response to virus);GO:0006810(transport);GO:0036094(small molecule binding);GO:0005506(iron ion binding);GO:0005215(transporter activity)	NA	NA	NA	lipocalin 2 [Source:HGNC Symbol;Acc:HGNC:6526]	MSTRG.4625.3	MSTRG.4625	.	yes	novel	trans	NA	-36.69	0.98725
ENSSSCT00000006200	0	chr1	302600679	302605199	MSTRG.2998	LCN2	yes	GO:0070062(extracellular exosome);GO:0005615(extracellular space);GO:0005576(extracellular region);GO:0097192(extrinsic apoptotic signaling pathway in absence of ligand);GO:0045087(innate immune response);GO:0015891(siderophore transport);GO:0009615(response to virus);GO:0006810(transport);GO:0036094(small molecule binding);GO:0005506(iron ion binding);GO:0005215(transporter activity)	NA	NA	NA	lipocalin 2 [Source:HGNC Symbol;Acc:HGNC:6526]	MSTRG.5643.1	MSTRG.5643	MYL4	yes	novel	trans	NA	-41.00	-0.960994
ENSSSCT00000006200	0	chr1	302600679	302605199	MSTRG.2998	LCN2	yes	GO:0070062(extracellular exosome);GO:0005615(extracellular space);GO:0005576(extracellular region);GO:0097192(extrinsic apoptotic signaling pathway in absence of ligand);GO:0045087(innate immune response);GO:0015891(siderophore transport);GO:0009615(response to virus);GO:0006810(transport);GO:0036094(small molecule binding);GO:0005506(iron ion binding);GO:0005215(transporter activity)	NA	NA	NA	lipocalin 2 [Source:HGNC Symbol;Acc:HGNC:6526]	MSTRG.5886.1	MSTRG.5886	.	yes	novel	trans	NA	-45.58	0.958373
ENSSSCT00000006200	0	chr1	302600679	302605199	MSTRG.2998	LCN2	yes	GO:0070062(extracellular exosome);GO:0005615(extracellular space);GO:0005576(extracellular region);GO:0097192(extrinsic apoptotic signaling pathway in absence of ligand);GO:0045087(innate immune response);GO:0015891(siderophore transport);GO:0009615(response to virus);GO:0006810(transport);GO:0036094(small molecule binding);GO:0005506(iron ion binding);GO:0005215(transporter activity)	NA	NA	NA	lipocalin 2 [Source:HGNC Symbol;Acc:HGNC:6526]	MSTRG.6301.1	MSTRG.6301	.	yes	novel	trans	NA	-33.36	0.986105
ENSSSCT00000006200	0	chr1	302600679	302605199	MSTRG.2998	LCN2	yes	GO:0070062(extracellular exosome);GO:0005615(extracellular space);GO:0005576(extracellular region);GO:0097192(extrinsic apoptotic signaling pathway in absence of ligand);GO:0045087(innate immune response);GO:0015891(siderophore transport);GO:0009615(response to virus);GO:0006810(transport);GO:0036094(small molecule binding);GO:0005506(iron ion binding);GO:0005215(transporter activity)	NA	NA	NA	lipocalin 2 [Source:HGNC Symbol;Acc:HGNC:6526]	MSTRG.6500.1	MSTRG.6500	.	yes	novel	trans	NA	-44.71	0.978394
ENSSSCT00000006200	0	chr1	302600679	302605199	MSTRG.2998	LCN2	yes	GO:0070062(extracellular exosome);GO:0005615(extracellular space);GO:0005576(extracellular region);GO:0097192(extrinsic apoptotic signaling pathway in absence of ligand);GO:0045087(innate immune response);GO:0015891(siderophore transport);GO:0009615(response to virus);GO:0006810(transport);GO:0036094(small molecule binding);GO:0005506(iron ion binding);GO:0005215(transporter activity)	NA	NA	NA	lipocalin 2 [Source:HGNC Symbol;Acc:HGNC:6526]	MSTRG.7277.1	MSTRG.7277	.	yes	novel	trans	NA	-29.31	-0.960187
ENSSSCT00000006200	0	chr1	302600679	302605199	MSTRG.2998	LCN2	yes	GO:0070062(extracellular exosome);GO:0005615(extracellular space);GO:0005576(extracellular region);GO:0097192(extrinsic apoptotic signaling pathway in absence of ligand);GO:0045087(innate immune response);GO:0015891(siderophore transport);GO:0009615(response to virus);GO:0006810(transport);GO:0036094(small molecule binding);GO:0005506(iron ion binding);GO:0005215(transporter activity)	NA	NA	NA	lipocalin 2 [Source:HGNC Symbol;Acc:HGNC:6526]	MSTRG.7456.1	MSTRG.7456	IL17RB	yes	novel	trans	NA	-49.86	-0.981246
ENSSSCT00000006200	0	chr1	302600679	302605199	MSTRG.2998	LCN2	yes	GO:0070062(extracellular exosome);GO:0005615(extracellular space);GO:0005576(extracellular region);GO:0097192(extrinsic apoptotic signaling pathway in absence of ligand);GO:0045087(innate immune response);GO:0015891(siderophore transport);GO:0009615(response to virus);GO:0006810(transport);GO:0036094(small molecule binding);GO:0005506(iron ion binding);GO:0005215(transporter activity)	NA	NA	NA	lipocalin 2 [Source:HGNC Symbol;Acc:HGNC:6526]	MSTRG.8436.1	MSTRG.8436	.	yes	novel	trans	NA	-45.74	0.959512
ENSSSCT00000006200	0	chr1	302600679	302605199	MSTRG.2998	LCN2	yes	GO:0070062(extracellular exosome);GO:0005615(extracellular space);GO:0005576(extracellular region);GO:0097192(extrinsic apoptotic signaling pathway in absence of ligand);GO:0045087(innate immune response);GO:0015891(siderophore transport);GO:0009615(response to virus);GO:0006810(transport);GO:0036094(small molecule binding);GO:0005506(iron ion binding);GO:0005215(transporter activity)	NA	NA	NA	lipocalin 2 [Source:HGNC Symbol;Acc:HGNC:6526]	MSTRG.8882.1	MSTRG.8882	.	yes	novel	trans	NA	-29.76	-0.956645
ENSSSCT00000006200	0	chr1	302600679	302605199	MSTRG.2998	LCN2	yes	GO:0070062(extracellular exosome);GO:0005615(extracellular space);GO:0005576(extracellular region);GO:0097192(extrinsic apoptotic signaling pathway in absence of ligand);GO:0045087(innate immune response);GO:0015891(siderophore transport);GO:0009615(response to virus);GO:0006810(transport);GO:0036094(small molecule binding);GO:0005506(iron ion binding);GO:0005215(transporter activity)	NA	NA	NA	lipocalin 2 [Source:HGNC Symbol;Acc:HGNC:6526]	MSTRG.9389.1	MSTRG.9389	ENSSSCG00000030480	yes	novel	trans	NA	-29.53	-0.953726
ENSSSCT00000006200	0	chr1	302600679	302605199	MSTRG.2998	LCN2	yes	GO:0070062(extracellular exosome);GO:0005615(extracellular space);GO:0005576(extracellular region);GO:0097192(extrinsic apoptotic signaling pathway in absence of ligand);GO:0045087(innate immune response);GO:0015891(siderophore transport);GO:0009615(response to virus);GO:0006810(transport);GO:0036094(small molecule binding);GO:0005506(iron ion binding);GO:0005215(transporter activity)	NA	NA	NA	lipocalin 2 [Source:HGNC Symbol;Acc:HGNC:6526]	MSTRG.10360.1	MSTRG.10360	.	yes	novel	trans	NA	-34.15	0.960206
ENSSSCT00000006200	0	chr1	302600679	302605199	MSTRG.2998	LCN2	yes	GO:0070062(extracellular exosome);GO:0005615(extracellular space);GO:0005576(extracellular region);GO:0097192(extrinsic apoptotic signaling pathway in absence of ligand);GO:0045087(innate immune response);GO:0015891(siderophore transport);GO:0009615(response to virus);GO:0006810(transport);GO:0036094(small molecule binding);GO:0005506(iron ion binding);GO:0005215(transporter activity)	NA	NA	NA	lipocalin 2 [Source:HGNC Symbol;Acc:HGNC:6526]	MSTRG.11036.1	MSTRG.11036	.	yes	novel	trans	NA	-37.82	0.955371
ENSSSCT00000006200	0	chr1	302600679	302605199	MSTRG.2998	LCN2	yes	GO:0070062(extracellular exosome);GO:0005615(extracellular space);GO:0005576(extracellular region);GO:0097192(extrinsic apoptotic signaling pathway in absence of ligand);GO:0045087(innate immune response);GO:0015891(siderophore transport);GO:0009615(response to virus);GO:0006810(transport);GO:0036094(small molecule binding);GO:0005506(iron ion binding);GO:0005215(transporter activity)	NA	NA	NA	lipocalin 2 [Source:HGNC Symbol;Acc:HGNC:6526]	MSTRG.11081.1	MSTRG.11081	.	yes	novel	trans	NA	-26.40	-0.987873
ENSSSCT00000006200	0	chr1	302600679	302605199	MSTRG.2998	LCN2	yes	GO:0070062(extracellular exosome);GO:0005615(extracellular space);GO:0005576(extracellular region);GO:0097192(extrinsic apoptotic signaling pathway in absence of ligand);GO:0045087(innate immune response);GO:0015891(siderophore transport);GO:0009615(response to virus);GO:0006810(transport);GO:0036094(small molecule binding);GO:0005506(iron ion binding);GO:0005215(transporter activity)	NA	NA	NA	lipocalin 2 [Source:HGNC Symbol;Acc:HGNC:6526]	MSTRG.12511.1	MSTRG.12511	.	yes	novel	trans	NA	-39.80	0.954106
ENSSSCT00000006200	0	chr1	302600679	302605199	MSTRG.2998	LCN2	yes	GO:0070062(extracellular exosome);GO:0005615(extracellular space);GO:0005576(extracellular region);GO:0097192(extrinsic apoptotic signaling pathway in absence of ligand);GO:0045087(innate immune response);GO:0015891(siderophore transport);GO:0009615(response to virus);GO:0006810(transport);GO:0036094(small molecule binding);GO:0005506(iron ion binding);GO:0005215(transporter activity)	NA	NA	NA	lipocalin 2 [Source:HGNC Symbol;Acc:HGNC:6526]	MSTRG.13419.1	MSTRG.13419	.	yes	novel	trans	NA	-47.61	-0.955703
ENSSSCT00000006200	0	chr1	302600679	302605199	MSTRG.2998	LCN2	yes	GO:0070062(extracellular exosome);GO:0005615(extracellular space);GO:0005576(extracellular region);GO:0097192(extrinsic apoptotic signaling pathway in absence of ligand);GO:0045087(innate immune response);GO:0015891(siderophore transport);GO:0009615(response to virus);GO:0006810(transport);GO:0036094(small molecule binding);GO:0005506(iron ion binding);GO:0005215(transporter activity)	NA	NA	NA	lipocalin 2 [Source:HGNC Symbol;Acc:HGNC:6526]	MSTRG.13663.1	MSTRG.13663	.	yes	novel	trans	NA	-38.36	0.966109
ENSSSCT00000006200	0	chr1	302600679	302605199	MSTRG.2998	LCN2	yes	GO:0070062(extracellular exosome);GO:0005615(extracellular space);GO:0005576(extracellular region);GO:0097192(extrinsic apoptotic signaling pathway in absence of ligand);GO:0045087(innate immune response);GO:0015891(siderophore transport);GO:0009615(response to virus);GO:0006810(transport);GO:0036094(small molecule binding);GO:0005506(iron ion binding);GO:0005215(transporter activity)	NA	NA	NA	lipocalin 2 [Source:HGNC Symbol;Acc:HGNC:6526]	MSTRG.13917.1	MSTRG.13917	.	yes	novel	trans	NA	-37.95	0.959357
ENSSSCT00000006200	0	chr1	302600679	302605199	MSTRG.2998	LCN2	yes	GO:0070062(extracellular exosome);GO:0005615(extracellular space);GO:0005576(extracellular region);GO:0097192(extrinsic apoptotic signaling pathway in absence of ligand);GO:0045087(innate immune response);GO:0015891(siderophore transport);GO:0009615(response to virus);GO:0006810(transport);GO:0036094(small molecule binding);GO:0005506(iron ion binding);GO:0005215(transporter activity)	NA	NA	NA	lipocalin 2 [Source:HGNC Symbol;Acc:HGNC:6526]	MSTRG.14046.1	MSTRG.14046	.	yes	novel	trans	NA	-33.88	0.99436
ENSSSCT00000006200	0	chr1	302600679	302605199	MSTRG.2998	LCN2	yes	GO:0070062(extracellular exosome);GO:0005615(extracellular space);GO:0005576(extracellular region);GO:0097192(extrinsic apoptotic signaling pathway in absence of ligand);GO:0045087(innate immune response);GO:0015891(siderophore transport);GO:0009615(response to virus);GO:0006810(transport);GO:0036094(small molecule binding);GO:0005506(iron ion binding);GO:0005215(transporter activity)	NA	NA	NA	lipocalin 2 [Source:HGNC Symbol;Acc:HGNC:6526]	MSTRG.14254.1	MSTRG.14254	.	yes	novel	trans	NA	-33.36	0.961114
ENSSSCT00000006200	0	chr1	302600679	302605199	MSTRG.2998	LCN2	yes	GO:0070062(extracellular exosome);GO:0005615(extracellular space);GO:0005576(extracellular region);GO:0097192(extrinsic apoptotic signaling pathway in absence of ligand);GO:0045087(innate immune response);GO:0015891(siderophore transport);GO:0009615(response to virus);GO:0006810(transport);GO:0036094(small molecule binding);GO:0005506(iron ion binding);GO:0005215(transporter activity)	NA	NA	NA	lipocalin 2 [Source:HGNC Symbol;Acc:HGNC:6526]	MSTRG.15022.1	MSTRG.15022	CEP250	yes	novel	trans	NA	-40.01	-0.965628
ENSSSCT00000006200	0	chr1	302600679	302605199	MSTRG.2998	LCN2	yes	GO:0070062(extracellular exosome);GO:0005615(extracellular space);GO:0005576(extracellular region);GO:0097192(extrinsic apoptotic signaling pathway in absence of ligand);GO:0045087(innate immune response);GO:0015891(siderophore transport);GO:0009615(response to virus);GO:0006810(transport);GO:0036094(small molecule binding);GO:0005506(iron ion binding);GO:0005215(transporter activity)	NA	NA	NA	lipocalin 2 [Source:HGNC Symbol;Acc:HGNC:6526]	MSTRG.15360.1	MSTRG.15360	.	yes	novel	trans	NA	-25.90	-0.951732
ENSSSCT00000006200	0	chr1	302600679	302605199	MSTRG.2998	LCN2	yes	GO:0070062(extracellular exosome);GO:0005615(extracellular space);GO:0005576(extracellular region);GO:0097192(extrinsic apoptotic signaling pathway in absence of ligand);GO:0045087(innate immune response);GO:0015891(siderophore transport);GO:0009615(response to virus);GO:0006810(transport);GO:0036094(small molecule binding);GO:0005506(iron ion binding);GO:0005215(transporter activity)	NA	NA	NA	lipocalin 2 [Source:HGNC Symbol;Acc:HGNC:6526]	MSTRG.16154.1	MSTRG.16154	.	yes	novel	trans	NA	-41.52	0.957654
ENSSSCT00000006200	0	chr1	302600679	302605199	MSTRG.2998	LCN2	yes	GO:0070062(extracellular exosome);GO:0005615(extracellular space);GO:0005576(extracellular region);GO:0097192(extrinsic apoptotic signaling pathway in absence of ligand);GO:0045087(innate immune response);GO:0015891(siderophore transport);GO:0009615(response to virus);GO:0006810(transport);GO:0036094(small molecule binding);GO:0005506(iron ion binding);GO:0005215(transporter activity)	NA	NA	NA	lipocalin 2 [Source:HGNC Symbol;Acc:HGNC:6526]	MSTRG.16956.1	MSTRG.16956	.	yes	novel	trans	NA	-41.92	0.961051
ENSSSCT00000006200	0	chr1	302600679	302605199	MSTRG.2998	LCN2	yes	GO:0070062(extracellular exosome);GO:0005615(extracellular space);GO:0005576(extracellular region);GO:0097192(extrinsic apoptotic signaling pathway in absence of ligand);GO:0045087(innate immune response);GO:0015891(siderophore transport);GO:0009615(response to virus);GO:0006810(transport);GO:0036094(small molecule binding);GO:0005506(iron ion binding);GO:0005215(transporter activity)	NA	NA	NA	lipocalin 2 [Source:HGNC Symbol;Acc:HGNC:6526]	MSTRG.17206.1	MSTRG.17206	.	yes	novel	trans	NA	-23.35	-0.975426
ENSSSCT00000006200	0	chr1	302600679	302605199	MSTRG.2998	LCN2	yes	GO:0070062(extracellular exosome);GO:0005615(extracellular space);GO:0005576(extracellular region);GO:0097192(extrinsic apoptotic signaling pathway in absence of ligand);GO:0045087(innate immune response);GO:0015891(siderophore transport);GO:0009615(response to virus);GO:0006810(transport);GO:0036094(small molecule binding);GO:0005506(iron ion binding);GO:0005215(transporter activity)	NA	NA	NA	lipocalin 2 [Source:HGNC Symbol;Acc:HGNC:6526]	MSTRG.19520.1	MSTRG.19520	.	yes	novel	trans	NA	-38.25	0.956208
ENSSSCT00000006200	0	chr1	302600679	302605199	MSTRG.2998	LCN2	yes	GO:0070062(extracellular exosome);GO:0005615(extracellular space);GO:0005576(extracellular region);GO:0097192(extrinsic apoptotic signaling pathway in absence of ligand);GO:0045087(innate immune response);GO:0015891(siderophore transport);GO:0009615(response to virus);GO:0006810(transport);GO:0036094(small molecule binding);GO:0005506(iron ion binding);GO:0005215(transporter activity)	NA	NA	NA	lipocalin 2 [Source:HGNC Symbol;Acc:HGNC:6526]	MSTRG.19762.1	MSTRG.19762	.	yes	novel	trans	NA	-54.07	0.981449
ENSSSCT00000006200	0	chr1	302600679	302605199	MSTRG.2998	LCN2	yes	GO:0070062(extracellular exosome);GO:0005615(extracellular space);GO:0005576(extracellular region);GO:0097192(extrinsic apoptotic signaling pathway in absence of ligand);GO:0045087(innate immune response);GO:0015891(siderophore transport);GO:0009615(response to virus);GO:0006810(transport);GO:0036094(small molecule binding);GO:0005506(iron ion binding);GO:0005215(transporter activity)	NA	NA	NA	lipocalin 2 [Source:HGNC Symbol;Acc:HGNC:6526]	MSTRG.20540.1	MSTRG.20540	.	yes	novel	trans	NA	-44.35	-0.969753
ENSSSCT00000006200	0	chr1	302600679	302605199	MSTRG.2998	LCN2	yes	GO:0070062(extracellular exosome);GO:0005615(extracellular space);GO:0005576(extracellular region);GO:0097192(extrinsic apoptotic signaling pathway in absence of ligand);GO:0045087(innate immune response);GO:0015891(siderophore transport);GO:0009615(response to virus);GO:0006810(transport);GO:0036094(small molecule binding);GO:0005506(iron ion binding);GO:0005215(transporter activity)	NA	NA	NA	lipocalin 2 [Source:HGNC Symbol;Acc:HGNC:6526]	MSTRG.21494.1	MSTRG.21494	.	yes	novel	trans	NA	-47.94	-0.965786
ENSSSCT00000006200	0	chr1	302600679	302605199	MSTRG.2998	LCN2	yes	GO:0070062(extracellular exosome);GO:0005615(extracellular space);GO:0005576(extracellular region);GO:0097192(extrinsic apoptotic signaling pathway in absence of ligand);GO:0045087(innate immune response);GO:0015891(siderophore transport);GO:0009615(response to virus);GO:0006810(transport);GO:0036094(small molecule binding);GO:0005506(iron ion binding);GO:0005215(transporter activity)	NA	NA	NA	lipocalin 2 [Source:HGNC Symbol;Acc:HGNC:6526]	MSTRG.21860.1	MSTRG.21860	.	yes	novel	trans	NA	-44.58	0.982678
ENSSSCT00000006200	0	chr1	302600679	302605199	MSTRG.2998	LCN2	yes	GO:0070062(extracellular exosome);GO:0005615(extracellular space);GO:0005576(extracellular region);GO:0097192(extrinsic apoptotic signaling pathway in absence of ligand);GO:0045087(innate immune response);GO:0015891(siderophore transport);GO:0009615(response to virus);GO:0006810(transport);GO:0036094(small molecule binding);GO:0005506(iron ion binding);GO:0005215(transporter activity)	NA	NA	NA	lipocalin 2 [Source:HGNC Symbol;Acc:HGNC:6526]	MSTRG.22503.1	MSTRG.22503	CIART	yes	novel	trans	NA	-38.97	0.960722
ENSSSCT00000006200	0	chr1	302600679	302605199	MSTRG.2998	LCN2	yes	GO:0070062(extracellular exosome);GO:0005615(extracellular space);GO:0005576(extracellular region);GO:0097192(extrinsic apoptotic signaling pathway in absence of ligand);GO:0045087(innate immune response);GO:0015891(siderophore transport);GO:0009615(response to virus);GO:0006810(transport);GO:0036094(small molecule binding);GO:0005506(iron ion binding);GO:0005215(transporter activity)	NA	NA	NA	lipocalin 2 [Source:HGNC Symbol;Acc:HGNC:6526]	MSTRG.22782.1	MSTRG.22782	.	yes	novel	trans	NA	-35.79	0.968744
ENSSSCT00000006200	0	chr1	302600679	302605199	MSTRG.2998	LCN2	yes	GO:0070062(extracellular exosome);GO:0005615(extracellular space);GO:0005576(extracellular region);GO:0097192(extrinsic apoptotic signaling pathway in absence of ligand);GO:0045087(innate immune response);GO:0015891(siderophore transport);GO:0009615(response to virus);GO:0006810(transport);GO:0036094(small molecule binding);GO:0005506(iron ion binding);GO:0005215(transporter activity)	NA	NA	NA	lipocalin 2 [Source:HGNC Symbol;Acc:HGNC:6526]	MSTRG.23105.1	MSTRG.23105	.	yes	novel	trans	NA	-24.15	0.964276
ENSSSCT00000006200	0	chr1	302600679	302605199	MSTRG.2998	LCN2	yes	GO:0070062(extracellular exosome);GO:0005615(extracellular space);GO:0005576(extracellular region);GO:0097192(extrinsic apoptotic signaling pathway in absence of ligand);GO:0045087(innate immune response);GO:0015891(siderophore transport);GO:0009615(response to virus);GO:0006810(transport);GO:0036094(small molecule binding);GO:0005506(iron ion binding);GO:0005215(transporter activity)	NA	NA	NA	lipocalin 2 [Source:HGNC Symbol;Acc:HGNC:6526]	MSTRG.23310.1	MSTRG.23310	.	yes	novel	trans	NA	-39.84	-0.97451
ENSSSCT00000006200	0	chr1	302600679	302605199	MSTRG.2998	LCN2	yes	GO:0070062(extracellular exosome);GO:0005615(extracellular space);GO:0005576(extracellular region);GO:0097192(extrinsic apoptotic signaling pathway in absence of ligand);GO:0045087(innate immune response);GO:0015891(siderophore transport);GO:0009615(response to virus);GO:0006810(transport);GO:0036094(small molecule binding);GO:0005506(iron ion binding);GO:0005215(transporter activity)	NA	NA	NA	lipocalin 2 [Source:HGNC Symbol;Acc:HGNC:6526]	MSTRG.24277.1	MSTRG.24277	.	yes	novel	trans	NA	-55.55	0.998861
ENSSSCT00000006200	0	chr1	302600679	302605199	MSTRG.2998	LCN2	yes	GO:0070062(extracellular exosome);GO:0005615(extracellular space);GO:0005576(extracellular region);GO:0097192(extrinsic apoptotic signaling pathway in absence of ligand);GO:0045087(innate immune response);GO:0015891(siderophore transport);GO:0009615(response to virus);GO:0006810(transport);GO:0036094(small molecule binding);GO:0005506(iron ion binding);GO:0005215(transporter activity)	NA	NA	NA	lipocalin 2 [Source:HGNC Symbol;Acc:HGNC:6526]	MSTRG.24765.1	MSTRG.24765	ACSS3	yes	novel	trans	NA	-42.92	0.966246
[truncated: 7,651 more rows]
